# Supplementary material for: Conserved Disease Modules Extracted From Multilayer Heterogeneous Disease and Gene Networks for Understanding Disease Mechanisms and Predicting Disease Treatments
Source: Front Genet. 2019 Jan 18;9:745. doi: 10.3389/fgene.2018.00745 (PMC6346701; doi:10.3389/fgene.2018.00745)
Supplement: Table S1 — Disease-gene data combining GWAS and OMIM databases. [file Table_1.XLSX]

## Sheet: Sheet1
MeSH id	Disease name	Gene id
D002288	Adenocarcinoma, Mucinous	10801 10164 3860
D006482	Hemorrhagic fevers, Viral	3383 3569 6347 3690 3384 3661
D019693	Hepatitis, Autoimmune	2952 1629 383
D006976	Hypertension, Pulmonary	57190 3371 2022 6532 3091 3725 6376 2152 7225 655 26585 650 3741 659 7222 658 9459 384 7223
D007248	Infertility, Male	1617 4552 4524 1080 57491 1390 338 283629 367 675 5428 3306 9985 1618 1589 2099 3640 29118 11004 6664 2944 676 79582 4282
D007683	Kidney tubular necrosis, acute	142 7301 558 3897 3570 10461
D007752	Labor, Premature	1668 9536 3553 1392 6279 671 1667 3698 387 3557 5972 6280 6401 3383 6347
D009165	Mycobacterium infection, Atypical	29851 3659 6556 6347 3458 3431 3576 64127 6583
D020191	Myoclonic epilepsies, Progressive	6046 378884 1476
D020190	Myoclonic epilepsy, Juvenile	6323 3786 1139 57369 6046 80258
D017696	Myopathies, Nemaline	7169 58 7170 6261 70 4703
D010391	Pemphigoid, Bullous	6402 6401 4282 667 3655 3688 3690 3383 3691 2214
D016066	Pleural effusion, Malignant	3685 6347 6356 6373 6367 1956 7490 3688 919 4318 794
D011470	Prostatic hypertrophy, Benign	3565 3557 1906 1471 2252 2 4489 1118 1462 4100 56999 4504 5916 11096 4103 1446 7316 8822
D016553	Purpura, Thrombocytopenic, Idiopathic	3952 4049 1524 3674 10673 3676 3690 3565 9103 349565 3688 3557 931 3458
D018233	Rhabdomyosarcoma, Embryonal	6302
D012873	skin diseases, genetic	5781 3858 9342 5894 3728 3861 242 387264 3848 11322 3486 488 6356 2235 3484 1634 9429 1544 7431 3918 26277 3691 2006 871 11285 5352 3909 3852 10516 224 3914
D015419	spastic paraplegia, hereditary	6683 80208 3798 3329 6687 3336
D013313	Stress disorder, post-traumatic	3576 2289 6531 348 4129 1392 1621 3558
D013494	Supranuclear palsy, progressive	1394 1128 1132
D013920	Thrombocythemia, Hemorrhagic	3939 7297 3948
D000386	AIDS	841 10095 8996 10092 847 26276 3638
D000028	Abortion	4524 3586 2147 3557 28 185 3458 1493 5054 123 3569 3105 64127 811 3565 356 7097 3683 10392 2153 2214 350 3717 940 4582 4160 581 2572 5443 52 4311 4012 9429 444 675 3949 7298 430 1081 3643 672 7216 2150 643 1082 4593 7253 6404 3802 1410 5069 10578 10376 1901 10155 9948 6643 6194 4477 3588 1830 100144632 3207 2649
D000037	Abruption placentae	4524 635 2152 183 2153 4522 6573 4552
D004931	Achalasia and cardiospasm	26191 5350 488 811 844
D000152	Acne	3934 290 4313 6278 4311 10392
D000172	Acromegaly	3630 3479 9049 2692 2688 2690 3486 3483 9370
D055623	Actinic keratosis	3265 6392 7220 1029 1030 2944 4321
D000230	adenocarcinoma	185 8795 183 5967 1548 7099 3875 7432 2246 360 847 136 1113 109 8858 7247 7479 26579 101 8935 64766 2043 689 9149 3198 368 3363 2161 112 7122 1180 3827 27074 489 5757 427 2289 5834 64784 10986 200504 10276 56287 7123 10003 10981 113
D003528	Adenoid cystic cancer	5300 1540 41 6659
D000236	Adenoma	3630 185 3569 623 3593 3586 4282 4314 2052 217 133 3290 2690 27035 4088 6414 1081 2137 10849 4361 2172 4118 9351 1902 7516 1082 3753 4158 11318 9146 63892 7296 7201 11284
D013964	Thyroid Neoplasms	9457 5933
D000257	Adenoviridae infections	3576 1027 5879 6019 4193 8856 842 2159 1981 1234 57634 10111 3360 466 27178 9021 207 598 1445 708 338 942 3596 8797 355 847 472 351 11100 4361 7307 5925 4179 4609 859 1525 595 5080 728931 8837 941 25942 1956 4057 11060 259230 9439 11009 332 6647 4683 1029 335 1977 5747 57019 581 5430 3716
D000308	Adrenocortical Hyperfunction	1029 6403 5443 354 6597 4158 1844
D000309	Adrenal Insufficiency	65057 26191 190
D000310	Adrenal Gland Neoplasms	37 231 1588 6595 185 186 3569 3291 3290 10911 3973
D000326	Adrenoleukodystrophy	65057 215 4591 10134 301 7082 133 7274 302 5340 5826 225 5825 406994
	Advanced cancer	9370 3479 3593 3952 2246 3654 586 597 4477 9185
D010022	Osteopetrosis	9842 10312 1186 4041 54 28962 1435 1180
D008108	Liver Diseases, Alcoholic	7124 3557 6352 1493 217 929
D004066	digestive system diseases	3553 2641 3569 3576 4583 1045 5967 3558 3586 3606 929 7097 6690 1080 3651 4582 9314 4585 7431 1048 1521
D000505	Alopecia	2697 10161 200879 1041 3383 3458 26191 6347 4276 2209 3557 3603 10673 26525 326 11168 2210 3106 3479 3569 3105 3572 3117 4763 5008 4306 5443 3688 3976 1489
D016301	Alveolar bone loss	4322 5028 6678 3553 414062 6348 6349
D000544	alzheimer disease	5300 6667 3316 3320 8851 2011 156 10273 5936 3576 10 4314 596 351 581 10763 2150 215 57338 10020 8878 6507 1103 25978 9445 27344 246744 3552 3553 3383 3630 4524 6648 3479 3458 7124 3569 7249 1509 3586 1234 355 3606 6347 356 7099 6283 1080 4552 7076 1401 4023 1636 1027 4548 1499 1471 341 2099 2246 718 5320 347 2100 5743 6653 5058 5328 6348 4353 3339 7077 1435 2 10399 6198 590 2688 5105 9619 19 335…
C536600	Amaurosis congenita of leber I	57096 1406 9227 7287 80184 6121 3614 5132
D002821	Chorioamnionitis	1906 3553 3569 4049 2952 4318 1543 133 155 3579 55894 650 302
D000686	Amyloidosis	4210 4150 3375 7276 351 4311 325 6288 4099 811 6622 6289 4153 3385 335 344 7124 4314 6406 567 11315 26353 1471 6647 2243 4069 929 643387
D000690	amyotrophic lateral sclerosis	6683 6647 1437 25978 142 80173 7076 3483 57679 6506 1639 4233 283 2022 25897 643387 57142 4015 3791 3350 9217 26287 4747 4137 7425 351 328 11127 6606 2950 3709 718 11315 779 3508 5868 27063 4087 367 4088 4318 4744 348 6607 3596 3915 1471 836 1432 259173 6347 627 1508 5034 9973
D000740	anemia	2168 7099 2056 760 57817 356 3593 2247 7124 3586 3458 1636 360 3952 11093 213 759 3569 5777 6352 6556 48
D018207	Angiomyolipoma	7249 3458 4241 1956 1464 10752 673
D013167	spondylitis, ankylosing	6648 3105 1401 1636 3952 3811 4488
D000844	ankylosis	650 9241 655
D000856	Anorexia nervosa	3953 627 3358 9575 6532 4128 3952 6530 4159 56729 421 181 3569 3356 7124 6462 9370 7352 3625 3458 7351 2641 6285 3352
D016736	Antiphospholipid Syndrome	350 5055 3479 5327 4524 8858 2212 302 3484
D001008	Anxiety Disorders	2571 2572 41
D001014	Aortic Aneurysm	3315 1215 3688 4317 3678 57142 59 7078 3586 1234 1524 4282 7076 3952 3117 4319 6376 10855 64131 3514 5104 368
C563178	Aortic valve disease	4153 10747 3315 338 718 335 5111 2006 727
D000741	anemia, aplastic	356 3586 6023 3117 2624 2952 3674 1543 3690 3119 7124 2950 1604 2944 7490 2625 2623 4773 6229 6223 28982 6165 6218
	Arteriopathy	4524 3630 1471 3569 4629 56729 4318 2006 6335
D001168	arthritis	1234 3606 6283 201294 9047 3552 3553 5307 1636 1902 10216 4313 6347 929 4318 3589 154 3439 3456 655 6351 1999 56172 445341 10135 56729 6648 3458 7124 64127 3600 26191 9536 2247 7097 3577 4282 5133 3604 7432 6556 10392 1401 3605 10563 1543 5008 4319 6387 9365 59340 1508 3251 3579 7434 4586 332 8840 682 6288 6368 57876 4584 353 11240
D010020	Osteonecrosis	302 1499 2147 2153 5054 4524 654 1387 9365 3091
D001249	asthma	1493 796 3586 7082 3603 5048 8797 1215 6362 3911 1495 6404 27159 1122 3702 3553 3383 4524 6648 4313 3371 3458 5054 7124 627 3576 623 4049 2944 3315 2952 2950 1956 56477 3565 1234 3627 3620 3606 1524 2247 7099 3659 7098 7097 1230 4153 3304 11213 6556 7076 3557 3119 942 1401 1906 3605 6369 1636 3567 8807 374 3566 3952 3117 2212 10803 596 3176 240 1958 6376 5743 598 1991 5328 6647 1179 135 847 3303 …
D001260	Ataxia telangiectasia	3251 4361 5976 5378 6197
D050197	Atherosclerosis	1234 2157 3383 7097 3683 3673 3091 4318 4323 682 3458 4314 6376 1435 3931 4162 10267 241 199 10290 65997 7292 185 4023 3484 338 1909 19 6649 4205 1910 6310 522 7273 80149 3553 3486 2204 3627 1524 10392 3557 10068 337 4548 2052 341 154 4256 3767 7450 345 1535 5360 5444 3949 1191 255738 79001 6404 221458 344 6402 627 3576 4049 2944 3315 2952 6356 3565 3586 6373 3304 2162 1839 941 1471 3952 1543 209…
D065631	Rhinitis, Allergic	2625 3383 9370 623 1956 1524 1906 3605 6376 7349 3274 3269 2150 6278 2302
D001289	Attention deficit hyperactivity disorder	9415 4524 3557 64324 412 150 3360 6507 55885 6616 2774 3352
D001321	Autistic disorder	2131 7472 26958 79083 4232 4340 64324 2020 22829 6532 2670 1139 3198 8828 2571 26960 9968 3105 27185 1950 7337 5307 4152 57502 552 80258 7166 4204 348 2697 5021 18 3211 3690 7248 26047 1589 721 627 438 1644 221035 9037 6263 7249 5864 3356 2739 4233 361 11069 9378 158 1141 596 6326 2944 154 412 100 6343 3952 6323 4128 6328 1137 7328 221037
D001327	autoimmune diseases	3738 26191 3112 3663 4124 59067 1594 4318 3570 598 2952 2215 871 721 1493 6367 3559 4153 6279 5133 356 720 8870 387082 596 3716 841 7466 10673 3565 634 581 3777 29126 3586 7099 6699 355 6280 7124 868 6556 578 2956 1621 6361 9235 3861 3576 3569 4650 10279 4261 2213 3627 4283 3428 7297 3117 3184 64135 3111 6366 6349 3674 326 4276 177 3106 6347 4282 3557 3119 3566 2212 846 100132285 5788 3456 2625 1…
D013967	Thyroiditis, Autoimmune	3630 3105
D053713	Azoospermia	1617 367 2067 29118 5906 190 1080 419 1618 66037 2678 3624 7077 7515 7076 675 3119 2068 2952 4254 268 1191 5940 2768
D001424	bacterial infections	5321 58191 5008 4582 25 6622 2152 7450 7184 11093 3594 639 64411 11117
D016585	Vaginosis, Bacterial	3553 4153 3576 4317 7097 3557
D020788	Bardet-Biedl Syndrome	583 79738 79140 27241 582 585 80184
D001471	Barrett's esophagus	864 7515 10643 4085 2944 699 6498 2068 324 6422 4583 3315 1045 57016 9971 3091 11197 2952 2950 3569 5967 1029 1956 8824 1646 890 1509 6497 5307 6648
D002280	Carcinoma, Basal Cell	6352 7124 3569 3576 1906 434 6280 26585 4437 7507 4694 2736 10961
D001506	Beckwith-Wiedemann Syndrome	10984 283120 64324
D001526	Behavioral Symptoms	7466 627 6532 3356 3350 6622 6285 4137 6530 9575 6531 1139 4204 1621 4128 1129 3351 3358 255239 2166 1137 7166 4129 26047 1141 6535 2670 6571 246744 4211 5142 10652 10611 267012 27185 9722 10814 10815 27184 2020 10042 10043
D001528	behcet syndrome	3605 3106 3565 10563 9370 350 4210 3576 3659 2944 3558 1234 2952 4276 2153 3952 7294 3606 6295 1543 7450 26191 1636 2023 2147 3458 4313 7099 64127 4153 7124 6648 104 6402 3552 3383 3593 6387 3821 3959 4318 6556 3673 3824 6366 2950 3553 8858 407
D001656	Biliary Atresia	3383 1490 6696 55997 4599 7076 929 4316
D001661	Biliary Tract Neoplasms	885 3217 348 338 3949
D001714	Bipolar disorder	627 2099 1139 63826 104 9152 267012 11113 6531 5992 4684 239 157 3351 3358 2774 27185 4729 6532 3612 5116 3356 1610 22809 3309 3337 4552 9341 6530 4128 7166 5015 116 262 6570 1848 3485 7226 282706 319100 7184 6482 8867 1493 3628 6285 468 9248 7494 7257 5074 815 5999 27201 3613 2195 10611 291 57142 9145 1393 3553 2670 4524 22854 6347 1129 9575 2643 6571 8863 4161 9722 56147 1644 2571 115 8864
D001749	Urinary Bladder Neoplasms	4103 11045 4193 857 2255 1129 285782 2167 1942 9581 6242 838 7348 3383 3683 4437 6659 6671 6670 7204 28 29126 356 5133 4763 1843 80381 916 79370 7111 3885 29766 29767 3552 7124 3105 3576 4049 811 1646 3659 1906 3953 4548 688 1440 9788 80705 2114 1191 4249 283120 1082 5080 3438 11076 79844 1441 64478 652995
D001847	bone diseases	3589 654 56975 4352 6452 2261 4313 3479 8838 5745 860 2131 7249 4763 5310 6608 6612 2200 2201 10683 3955 9098 3605 249 7430 4041 632 4094 6277 1116 1186 54 27179 7480
D001855	bone marrow diseases	1524 2120 861 4602 3718 25 613 56896 5155 2623 4352 3107 3662 57126 10320
D001856	Bone metastases	3569 3565 1906 7431 3678 9241 79109 2253
D001927	brain diseases	351 5300 3416 10935 8878 25978 6571 27344 246744 6622 6285 4137 6531 6623 358 6323 2629 27165 10560 4661 429 8851 94 9211 10215 4656 6598 29103 57534 1600 10810
D002545	Brain ischemia	596 4192 3776 2056 185
D001932	Brain Neoplasms	10135 3181 56666 4155 28996 5764 29103 57534 7249 11093 2014 10389 396 9588 5803 1910 64098 55966 3630 64101 575 9334 63827 6447 1936 11162 2290 6620 56034 6156 3945 5015 6224 2251 3383 3569 9536 4314 4763 3456 104 842 140 5338 5029 1520 103 26524 9113 5337 56105 10161 754 1620 6539 3225 351 847 8862 43 4145 643 187 412 10401 4735 11095 10991 1641 5880 2250 2734 366 379 1600 1514 3576 6347 7098 4…
D001943	breast neoplasms	5054 3383 3569 3576 7076 2214 1906 4772 10628 632 1116 712 406903 1452 3856 2152 6279 1445 685 9314 6280 81 1848 333932 8996 7227 9703 244 7466 65018 6531 5071 64699 668 4128 4537 3360 1589 6311 80198 3199 79776 284654 3479 4276 1436 2052 1909 2688 8862 3624 10553 2625 5361 1191 1874 2689 1910 3198 1588 1410 3313 3760 10863 5931 199974 5304 57646 1981 11095 4691 6009 6360 57708 11073 6385 6401 47…
D001982	bronchial diseases	6352 929 1910 6037 3779 7078 57016 6356 1612 154 6280 2729 1525 56171 25911 1232 6189
D016535	Bronchial hyperreactivity	1116 80332 2099 3596 3586 387129 1401 3567
D001987	Bronchiectasis	3458 6338 7097 3577 6340 4317
D001988	Bronchiolitis	3429 6348 3383 1178 6347 1493 627 6352
D001989	Bronchiolitis obliterans	64127 4317 7076 3569 653509 3605 4318 3576 3458
D001997	Bronchopulmonary dysplasia	7076 3557 2150 4313 1636 2252 7077 4318 3586 3371 3553
D002006	Brucellosis	6402 3586 3565 4210 7099 3458 3557 3569 6556 1234 2212
D002032	Bulimia	9370 4160
D008223	CNS lymphoma	462
D009362	CNS metastases	5071 2643 6347 7077 3423 4313 1608 26471
D009369	neoplasms	4524 928 7515 10643 2944 699 2068 1509 301 10 2235 1543 125 8797 6198 19 4092 283 100133941 3309 1591 3575 2191 1030 8848 4192 8842 5947 6425 4144 9787 664 126 9836 6657 7184 5420 4070 2719 200734 2021 7517 406991 11009 780 10987 4102 64754 5037 290 9839 5295 900 7482 1048 2067 247 2017 4035 8828 1630 9156 10848 7508 9075 1545 7083 572 3185 26018 2048 9610 79661 2627 10402 329 474 3741 10188 5786…
D002196	Capillaries disease	7422 4313 1401 1906 929 1909 2022 4089 2157 659
D002277	carcinoma	10643 3682 6446 7184 10232 64073 5883 6418 10857 10017 3636 540 1893 4489 3394 5435 27250 3399 7253 7514 3912 7170 10210 10961 63892 9656 9448 4175 7205 479 22846 6146 60485 9557 256646
D002318	cardiovascular diseases	6401 9370 177 185 4524 4313 183 3569 2153 2147 1401 1636 348 6403 3990 4018 186 10911 1535 284 118 2155 522 2946 270 5144 94 3479 5054 2244 4256 5045 19 335 2303 5360 5806 1071 3791 302 9342 10928 2266
D002446	celiac disease	26 4153 7099 3117 4650 6285 6401 3240 4276 2212 3586 3593 1493 317782 3553 10803 355 4282 3558 142 3119 3460 3659 9231 940 26191 59067 3383 578 553128 4295 356 3458 8807 7124 596 3176
D002493	central nervous system diseases	6622 351 4137 836 7298 4747 6323 6683 1129 9211 497231 3423 2700 246744 10215 57534
D002526	cerebellar diseases	4233 4150 773 5978 4287
D002547	Cerebral palsy	4153 3576 3569 3479 5354 3606 2153 3486
D002561	cerebrovascular disorders	2944 4524 1535 2153 351 4056 338 3557 348 9370 2243 613 2099 337 2952 2162 3558 9575 4574 4661 6506
D002583	Uterine Cervical Neoplasms	6590 3630 7124 6515 2625 3280 10901 871 10904 388585 259230 2083 1493 3569 488 7098 7076 9021 3572 5317 1440 1437 6480 3429 815 253738 6206 9902 489 11005 9886 57018 79192 3428 3552 3553 3106 3479 3458 57016 3105 3586 1234 356 3659 4276 3557 940 3329 4353 4321 6495 29102 7079 4654 771 6522 6548 29071 3678 4513 3385 8809 3451 10495 27074 11202 57864 3226 2041 4714 2059 2188 29947
D002607	charcot-marie-tooth disease	10397 2705 2617 2013 4747 4000 1959 2064 9927 9516 4359 2065 57716 5376 4534 10112 3315 3236 8898
D018281	Cholangiocarcinoma	356 4314 4276 9021 7276 10635 6294
D002761	Cholangitis	355 7098 3875 58191
D002769	Cholelithiasis	2099 4043 64241 64240 3953 885 341 348 10062 7434 3952 338 335 367 2100 4586 345 1956 9971 4276 4295 5320 7432 155 339
D002779	cholestasis	4599 356 836 4586 9076 6657 9971 10257 2688 4311 72 10062 200931
D002813	Chondrosarcoma	177 3371 4314 3624 6608 10342 6496
D002817	Chordoma	652799
D002822	Choriocarcinoma	3717 4012 430 3643 7078 3481 3458 2114 3952 283 6095 3356
D002825	Chorioretinitis	3576 8837
D015673	Fatigue Syndrome, Chronic	3356 5743 1636 4092 7465 6041 6532 866
D029424	Pulmonary Disease, Chronic Obstructive	133 2638 3553 2950 3596 4318 9446 3569 10663 925 154 1544 6590 488 6692 10 3684 2052 847 3576 4312 3586 820 246778 142 3627 4586 719 487 135 2952 260431 9122 5328 7099 26279 3952 6517 6648 3791 3587 6373 2944 3383 1234 3606 3557 1432 2056 3683 1636 9370 6441 728 4153 2260 5141 7097 7076 720 5144 6532 6439 2729 1159 3689 6649 7422 1179 6356 4321 6352 1543 653509 2006 11318 11315 6556 1401 4323
D017246	Ophthalmoplegia, Chronic Progressive External	291 5428 56652 5442 4550 4565
	Chronic rejection of renal transplant	80310 6352 1490 2621 943 183 1234 1026 655 2011 4283 1636 4313 4524 3627 29851
D005901	Chronic simple glaucoma	355 1545 10133 4653 29110 1636 2944 4016 399564 356 26254 348 3557 4524 1026 2952 2056 8904 5054 2006 9542 2723
D008103	liver cirrhosis	3479 5950 9158 348 1401 7490 3630 2247 6648 655 11093 9370 3856 350 2671 3875 4524 3952 3484 6403 4314 1890 6517 56729 359 4193 5947 79602 3486 183 2152 2157 943 1950 1029
D018262	Adenocarcinoma, Clear Cell	123 7071 3624 916 4286 466 10061
D002972	Cleft palate	3664 2260 4487 2304 2246 652 4548 9915 6259 5818 2571 4522 9 4524
D003057	Cockayne syndrome	2074 328 2073 4000 1161 2068
D003110	Colonic Neoplasms	10861 2583 430 9340 4049 6532 3356 3359 3357 7099 1048 811 590 335 6521 2182 308 5376 57460 3960 4314 9122 1668 1667 5414 7345 11254 9194 2242 3565 1401 27035 9965 80351 28514 794 1152 2192 6288 2678 6402 7124 356 4772 6403 3329 846 1179 4000 2033 6383 839 10562 9604 57531 3957 643 7114 3718 11184 26574 1949 10415 1487 4773 27330 6401 3383 3479 231 1493 3673 3105 3600 5321 488 10392 7076 1906 205…
D016511	Severe Combined Immunodeficiency	3718 64421 3717 100 916 915
D003139	Common cold	10901 6329 3579 673 6403 1180 142 231 6093 79054 3763 152 3303 4023
D017074	Common variable immunodeficiency	4068 10673 695 943 29851 930 942 3574
D014860	Warts	3119 27429 1956 9113 3117
D003141	Communicable disease	3458 3593 3596 1234 7099 929 7098 7097 4153 6504 2212 3459 10062 3594 4360 5897 5896 3929 5003 767558 79132
D019955	Conduct disorder	1080 217 1187 10804 9132 64699 4640 552 406874
D000013	congenital abnormalities	2641 540 7078 64127 6331 4292 6469 4255 324 3091 5967 1029 3586 7099 3577 5925 3304 1948 4314 1499 2056 3572 249 6622 1490 4487 2304 596 595 4763 1958 10673 5048 6439 3375 3291 5968 208 3290 5788 7450 7430 5055 2303 5962 65018 100133941 7276 4478 2033 3575 2690 1030 10855 2706 24 332 2272 6657 10653 5071 3911 182 9839 5915 1028 10666 10984 467 1545 2048 8945 919 3741 7428 3816 25 11006 5340 55997…
	Congenital heart disease	2626 70 6532 5781 659 5021 8912 1482 438
D003240	connective tissue diseases	2200 4312 1636 6625 94 10491 1051 4583 1991 7431 682 7074 5324 4669 6448 3425
	Copper metabolism disorder	331 540
D003316	Corneal disease	6667 6649 332 4070 3859 4166 5308
D018352	Coronavirus infection	59272 290 57532 9727
D003398	Craniosynostosis	2261 7291 2260 2263 3725 4745
D007562	Creutzfeldt-Jakob syndrome	1509 1113 102 199
D003480	Cushing syndrome	2696 3291 3606 3557 3569 5443 3576 3290 3973 2688 2695
D018219	Histiocytoma, Benign Fibrous	6439 6435 871
D003550	Cystic fibrosis	154 1445 1080 671 3586 1179 135 7100 3553 3552 2638 7099 3576 2950 4538 57120 4582 6340 7097 4318 6348 10399 1649 2212 411 7439 10365 6439 3383 9341 9368 6361 6441 820 5328 22802 59341 6565 6667 6338 6435 5045 3557 6590 3605 3606 5320 7295 10747
D003556	Cystitis	3700
D003586	Cytomegalovirus infection	567 7097 4218 6590 1950 6376 1956 5371 9308 1524 7298 240 1981 9118 7099
D003638	Deafness	2153 379003 5795 259236 1428 11078 10083 4647 246213 791116 285381 353347 71 2944 2952 2950 5781 2056 4538 847 5962 2706 182 4549 2625 5376 4574 57369 494513 9381 64072 2070 1187 10804 9132 64699 3784 4508 10723 4646 4627 4640 57167 1188 448962 65217 3198 3753
D055959	Intervertebral Disc Degeneration	6515 56606 6513 176 3554 4313
D003711	demyelinating diseases	57165 6285 3676 5803 3485
D003744	Dental enamel hypoplasia	4763 9622 10117 9313 265 10970
D003773	Dental plaque	351 9370 1524 356 1401 29851 2697 5008 6403 3569 718 4137 12 3553 5054 5320 3630 4319 347 596 3952 10544 3606 578 4312 627 7076 285 3329 2100 2060 6622 240 5317 1958 6326 6376 3383 5743 9536 6489 64924 6653 3315 5300 2099 3586 355 4048 598 6696 2152 5058 7082 6401 4318 1991 3576 2147 348 29933 9332
D003863	Depression	727 6622 5806 183 627 3350 6531 6281 6532 1499 10611 8910 3480 3351 2289 2670 408 27185 348 1109 816 5027 3688 718 3576 7166 4543 4524 1394 5136 815 7276 57142 6347 1843 9370 9530 1129 4128 9575 3356 3776 5020 135 3673 6403 2099 5142 9518 11076 185 367 4137 317 5443 7466 337 1636
D003872	Dermatitis	3553 7124 3350 10 1636 3603 3091 3557 3119 1499 581 3791 6256 2101 2104 6258 6401 3106 3569 64127 10344 3315 29126 6366 1432 9308 4650 3572 348 5008 3329 4057 6362 11009 3976 6404 1489 29949 6346 6363 27179 386653 339345 1514 6352 3458 1493 627 3600 3593 796 6532 3356 2944 2952 2950 3596 3565 3606 1524 929 7097 4153 7432 4283 7076 3567 3566 341 154 6403 6376 5328 836 360 6361 1215 1437 4088 26762…
D003919	Diabetes insipidus	551
D003920	diabetes mellitus	2247 2056 1490 233 57125 7422 231 387082 5970 5327 142 7295 3767 7351 2673 359 1234 942 3484 1471 1950 3115 2572 186 2088 3401 7450 9451 57818 2087 4760 3630 10135 177 6517 3240 4023 3172 2695 2645 3375 11132 7350 3725 1432 348 2697 4353 7077 6513 7220 8848 655 4317 6559 1668 9844 2168 1667 26585 27063 5444 64132 10855 64131 27035 4162 72 4192 6383 1634 6401 3383 2678 7466 4524 6402 1493 5054 712…
	Disseminated cancer	8826 5967 3339 4317 3590 1116 2683 56924 7454 7456
D004211	Disseminated intravascular coagulation	350 1991
D004314	Down syndrome	2623 10776 4524 351 9588 1859 10935 9980 7179 836 9782 6347 6573 4552 361 2029 5936 2170 3718 348 1139 3559 4137 820 5978 4548 861 6285 3772 571 2670 760 3856 875 3925 3623 4666 6453 6647 2665 4684 9619 6493 4128 9796 2099 3763 266743 1137 3952 1141 2166 4722 5052 3094 3329 3569 2077 10570 755 410 10399 3181 9510 5058 25902 1910 3717 1136 2078 5981 10578 7124 6616 10989 5316 2173
D019966	Substance-Related Disorders	217 2944 2950 627 3357 1139 3673 3688 1667 3685 886 3308 4158 9956 8863 9951 2668 596 5294 6531 9607 255239 4286 9497 3553 796 3304 3557 348 1622 125 2572 5443 216 126 1392 4684 1850 8910 127 6257 11343 8811 2567 9369 374879 2587 57001 5368 5972 6331 6532 4292 6469 3091 1956 1234 929 7097 3481 2056 4363 4068 1490 1950 940 595 154 718 5320 2152 3265 920 3297 567 335 345 7351 6530 7220 6528 2064 19…
D004409	Drug-Induced dyskinesia	2944 2950 255239 1544 3356 6648 348
D004370	Duane retraction syndrome	1123 3232 57167 27319 668
D056912	Binge-Eating Disorder	3953 3952 2693 3630 3576 3600 3359 2950 1029 6696 2247 4193 3683 596 351 6279 3265 3375 2688 9138 4088 1462 3320 27032 3698 79923 134 11214 5906 9177 5122 55885 6492
D004476	ectodermal dysplasia	80326 3861 5317 7189 7187 60401 3891 2706 3248
D018236	Carcinoma, Embryonal	3552 4760 1514 9370 2678 3636 185 3371 3479 3458 183 843 5054 7124 3569 3105 3576 3600 10096 6566 3359 8824 5307 3565 3558 3586 3620 3606 29126 356 7099 3659 3856 3875 6690 6556 2153 4276 2147 7076 10747 59067 1401 1906 1636 4277 1893 4548 3572 3484 2052 1471 348 3952 939 1490 2212 727897 5320 5300 2152 5058 6364 10673 3559 920 3297 116 10399 6590 6446 4160 567 847 2688 685 186 2088 688 6464 3439…
D004646	Emphysema	2012 9315 4312 3458 8797 1029 4318 10296 2052 4321 4313 581 1520 2013 2263 5111 2252 1958 2950 3694 8795 4233 4323 5906
D004660	Encephalitis	2149 7098 351 3456 6348 2026 5010 3557 1234 4340 4155 348 9024
D001927	brain diseases	6517 540 4015 4017 475 5368 4552 7494 348 338 1629 9409 5830 2746 4535 4567 4547 3251 1118 2023 5009 875 2200 4204 56652 2731 1967 4729 22854 2744 2184 445 10165 2582 2592 5053 4129 593 594 2720 57679 4553 353 79158 57192 10956 538 6609 29881 10577 4580
D006043	Goiter, Endemic	1906 595 3763
D004701	endocrine gland neoplasms	5961
D004700	endocrine system diseases	4221 3479 6462 641 5979 6261 779
D016889	Endometrial Neoplasms	3659 1191 87 727897 4321 5027 1394 3623 27086 4590 2101 2104 9370 3569 7249 1401 1636 6279 2688 5055 2033 4440 10468 3336 2150 190 3206 255082 57535 219681 11167 3177 27043
D004715	Endometriosis	3569 3576 1029 4193 595 1437 1026 3811 3804 3552 3553 3383 9370 3106 6352 405 3240 3371 2022 3479 3458 3486 4312 7124 3105 3600 4049 26191 7515 2944 2952 2950 1956 3565 9536 3586 3606 6347 2247 356 3821 3824 1230 3577 4282 5925 4318 4486 10 4314 2147 7076 1432 3557 3605 3953 1636 5970 3589 4316 1499 2056 3484 1543 2099 2246 1950 718 285 2100 5743 4322 5328 3603 10673 7077 4321 4057 3845 2638 847 …
D016889	Endometrial Neoplasms	155 3624 221895 3552 57016 8856 3953 1594 1462 3996 3292 3783 4512 3973 2119 255082 57535
D004751	Enteritis	248 56244 64127 3604 7099 3683 6583 6283 6352 4210 4049 4153 1080 3304 7100 2162 7432 3620 345611 3596 11213 6556 10392 6584 3651 3383 1948 4486 3576 58191 3565 6696 1524 396 8856 3606 10 4552 929 1045 6372 4283 7097 4314 3458 26191 219771 3569 9231 2153 3780 4276 3856 2147 4312 3586 7076 1432 7124 7291 3563 2209 3557 3119 7494 942 1436 9308 10747 9966 59067 7433 4650 4680 10068 80209 2214 337 14…
D004802	Eosinophilia	6361 64806 2120 3559 3567 25 26511 330 4582 332 904
D004806	Ependymoma	2035
D004820	Epidermolysis bullosa	3875 5339
D004827	epilepsy	6046 4694 627 1137 1141 1135 1958 8913 5955 4512 3553 6532 3350 4193 1612 57142 1965 11332 9568 4524 3565 8856 1471 4363 846 7351 477 1181 2752 7428 3312 4593 4204 401 1621 22854 3778 10928 2018 5816 6324 9211 10947 56172 8912 378884 1203 26047 2055 57526
D020031	Epstein-Barr virus infection	3553 4068 3586 581 6361 256646 2633 4609 1965 3925 332 6347 10170 1880 7097 7187 596 10673 6367 10148 2272
D004935	esophageal diseases	10344 4255 864 7515 1646 5052
D004938	Esophageal Neoplasms	29126 6556 2252 217 6280 27030 7103 339967 255313 56999 80196 26986 4502 3266 5052 2125 728461 10023 80380 2071 65117
D004941	Esophagitis	6356 3569 3553 9971 3596
D004938	Esophageal Neoplasms	9370 57016 9971 79400 11162 1604 6347 4314 10146 1936 4179 3479 1636 339967 80196 26986 2125 65117 29102 6401 5054 6497 1401 858 6279 5087 1113 3624 27076 6596 4504 5914 2114 1191 6707 5333 26579 5918 100126794 10982 3235 1387 3676 4118 9659
D004948	Esotropia	1956 3292 596 4320 412 4318 183 3479 3949 10855 185 867
D012512	Sarcoma, Ewing	3315 4314 142 885 5338 56888 190 2078 56034
D010145	Paget Disease, Extramammary	4327
D005134	Eye Neoplasms	5925 596
D005128	eye diseases	24 6295 387715 10133 6017 4016 4653 7466 2121 493856 1400 9663 5961 4694 56896 5782 1121 1195 6426 1415 1409 80207 664780 60506 594832 401 8929 57165 692222
D010505	Familial Mediterranean fever	4210 6348 6288 7124 3606 929 4010 3592 3952 6289 4276 1636 368 3458 7422
D005199	Fanconi's anemia	142 545 2176 6709 2177 641 29089 7161 472 675 7514 3280 1111 2175 2189 4683 79728 2178 2187 7124 3320 2122 2072 581 3458
D005234	Fatty liver	635 213 4233 79602 9370 3586 355 341 1622 2678 3952 338
	Female reproductive cancer	11253 269 4436 580 6560 9990 10723 10481
	Female reproductive system disorder	3952 6462 3991 268 5047
D005315	Fetal diseases	1668 1667 6279 2733 671 6280 1234 3291 5788 4556
D018226	Fibroadenoma	3624 6009
D007889	Leiomyoma	6462 5021 3479 1636 1490 578 7075 2192 10152 56034 10979
D005350	Fibroma	283120
D005356	Fibromyalgia	4129 627 3586 4128 3479 3486 3576 6532
D005354	Fibrosarcoma	1215 7177 1836 27236
D005368	Filariasis	1906 3558
D005494	Folic acid deficiency	7298 4524 3479 6573 2151 25902
	Gallbaldder cancer	1490 2947 356 9308 5371
	Gallbladder disease	335 338 581 9429 7434
D005756	Gastritis	6469 355 356 3557 374 3566 1044 1612 3552 6401 6402 3593 4292 7099 4282 5925 4318 1906 3953 2252 6364 6590 567 7349 55894 1398 495 4436
D005770	gastrointestinal neoplasms	4261 9314 6692 2274 11107
D005759	gastroenteritis	56477
D046152	Gastrointestinal stromal tumors	3479 79602 4763 3196 7075 9836
D005770	gastrointestinal neoplasms	1956 3815 58 3672 6391 3655 1943 4277 2272 10 9314 7184 1495
D001008	Generalized anxiety disorder	9402 2572 9370 1493 6532 2571 4128 3937 3569 26191 27040 940
D009373	neoplasms, germ cell and embryonal	79923 7503 7258 29122 442918 9656 442917 373863
D016640	Diabetes, Gestational	3486 2247 4153 3484 257313 2030 9388 5077
D031901	Gestational Trophoblastic Disease	3484 3283
D005877	Gigantism	2597
D005879	Tourette Syndrome	64221 8910 6531 9177 3359 26047 5315
D019214	Gingival overgrowth	6678 3339 1906 1493 3600 2252 4312
D005901	Glaucoma	348 2099 2100 1909 153 7299 7306 3552 3553 4524 6648 6422 1956 1646 4318 5830 578 596 154 2697 598 823 581 7276 1645 1545 771 2200 5308 4016 4653 2296 10896 2723 10218 338917
D005921	glomerulonephritis	5054 2204 3816 1991 6446 4353 4313 3727 7076 1493 2215 5027 4179 3569 348 4318
D018149	Glucose intolerance	6447 6401 4760 3383 3630 1514 2641 10135 10891 64102 9370 79068 177 2678 5950 56729 844 6517 3636
D006008	Glycogen storage disease	178 7450 3576 57818 3768 2632
D006059	Gonadal dysgenesis	2254
D006073	gout	56606 1490 3565 650 7097 4150 4314 3553 654 2191 3251 5321 5743
D016905	Gram-Negative bacterial infection	1080 4276 4057 6521 55894 572 634 10018 4615 10971 4598 729
D006105	Granulomatous Disease, Chronic	4297 1536 7124 1535 79400 4688 1666 26040 27035 4197 63976 654817
D006111	graves disease	1493 2260 896 3107 3553 6401 3383 9370 6352 3105 3596 1234 943 29126 3659 3604 1906 941 596 154 3603 2638 581 7293 3480 6480 7253 909 944 10663 911 6482
D005317	Fetal Growth Retardation	3481 1471 348 3952 10272 4153 3291 9370 3479 355 476 1906 1950 5743 3484 6347 183 4318 1082 6285 2022 308 5806 6533 29124 3486 4313
D017359	HELLP syndrome	356 4179
D015658	HIV infections	598 4478 1487 3576 9332 5111 6011 4292 355 943 356 6373 596 581 1535 4208 4311 6362 4035 641 10663 2237 1025 7251 3914 1642 3383 9370 56729 6648 6402 7124 3105 3600 3315 6696 29126 6347 6366 5133 1432 7433 3689 3953 941 10563 3952 940 6376 3603 6348 6349 3559 920 567 6387 2688 5788 3439 7293 1051 3309 3575 2030 60489 332 947 5329 2149 10666 1869 6351 1495 643 5764 9154 2010 4747 2720 8809 3702 35…
D015490	HTLV-I infections	355 917 3569 4318 8837 7295 6352 3570 3586
D011658	Pulmonary Fibrosis	6469 3566 2294 3552 177 185 4313 3486 183 7078 4312 57016 3569 1029 6366 301 3589 595 5328 4582 1215 6649 387 10988 79187 3488 255520
D006331	heart diseases	3557 217 6331 3383 3569 185 1636 347 4000 4205 270
D006333	Heart failure	7078 7124 1234 6347 4318 3484 1909 135 4306 2170 5423 3736 1910 3784 3753 79902 1489 874 9815 56729 6517 4015 3106 3479 4312 623 6532 5350 3606 6696 2247 7099 1080 7076 1432 1906 3572 142 154 2697 3329 2152 7082 4322 1511 834 133 6513 2303 1113 6649 27063 359 9429 1843 79400 3757 8996 5744 10411 2296 270 57142 11188 153 112 817 3752 4625 26471 27086 6262 4607 2281 3910 406904 9759 4624 7122 6271 …
D006349	Heart valve diseases	11061 58191
D016481	Helicobacter infections	3458 4313 29126 4440 3576 4353 7099 3606 9173 3952 4090 3459 4092 6364 4318 836 3586 3553 57379 5111
D006373	Helminthiasis	3565 3567 6361 1118
D006391	Hemangioma	199
D006413	Hematopoietic system disease	3717 9076 861 11093 2623 4352 26511 80324 10320
D006453	Hemoglobinopathies	6521 64162 910 911
D000743	anemia, hemolytic	3458 1493 6566 2068 3586 9563 6513 5313 6521 2067 4556 286 2038 2595 64162 546
D006463	Hemolytic-Uremic Syndrome	4179 1026 3574 4173 6376 10911 3559 1996 11093 4763 1993 9982 3566 3600 629 2152 3190
D006467	Hemophilia A	1234 4609 2157
D006474	hemorrhagic disorders	5781 2153 5327 7450 11093 5340 2155 2266 2243 3818 5345 2158 2162 2147 2244 10257 3426 3690 3674 4043 302 2192 2157 2161 2160 4352 2159 3257 388552 65082 1130 57101
D011695	Purpura, Schoenlein-Henoch	3569 133 183 3553 3105 847 4318 26191 721 3106
D006505	Hepatitis	3553 3998 60489 3554 2678 2944 2952 4055 3577 301 10875 58191 5133 3725 351
D006509	Hepatitis B	3105 1230 4282 3440 4261 4313 183 7124 29126 6347 356 4318 7076 285 7077 335 1116
D006526	Hepatitis C	1234 2204 4524 3586 4599 3558 3627 3620 355 1493 3606 6696 943 29126 3913 3479 3350 6347 1524 5950 2247 356 3821 3552 7099 4288 3659 2022 929 7098 3824 254958 3458 7097 9370 1230 79602 6352 3553 3856 3875 3569 4193 6373 6366 3576
D018197	Hepatoblastoma	4353 2033 28514
D030342	genetic diseases, inborn	4629 6622 860 5048 4683 351 2707 445341 27035 2237 6597 7436 1121 7273 2623 2619 4000 1834 29851 57379 2071 10111
D003123	Colorectal Neoplasms, Hereditary Nonpolyposis	834
	Herpes	9669 3552 5781 351 5894 3383 1604 2572 3685 3694 942 941 6667 9451 3456 3312 3337 3105 3586 348 2099 5047 421 284359 3600 6532 3359 2950 1029 6696 2247 4193 3683 596 6279 3265 3375 9138 4088 1462 3320 27032 3698 79923 134 11214 5906 6531 9177
D015614	Histiocytosis	7124 3557 3605 1435 348 6609 29881 10577 57556
D006689	Hodgkin disease	3553 6401 3383 6402 3105 3576 3596 3565 3586 943 29126 5133 7076 3557 3119 350 2030 104 1540 80380 4361 3590 10111 1965 5966 4065 3535 602 3726 3219 9936 3902
D006816	Huntington disease	57338 627 3952 9322 9869 135 28964 2668 6446 4487 4313 2166 4129 2597 10915 246744 4524 9001 3300 7077 207
D006828	Hydatidiform mole	100 199713
D006849	Hydrocephalus	355 4774 836 117 3897 356 2683 4137 27130
D006929	Hyperaldosteronism	2768 4221 185 57786 5395 1187 1188 5997 3758 6557
D006937	Hypercholesterolemia	183 1956 6647 4547 6401 5346 185 3569 3576 6347 356 7099 1401 3953 6403 19 7450 1535 64241 64240 1191 255738 55911 4565 29881 10842 26119
D006943	Hyperglycemia	1535 207 7225 6352 4023 2695 2645 3569 3576 653361 3479 10135 2731 5054 208 6446 183 6649 3767 9588 3091 2641 6608 3552 3643 80309 3565 11132 2739 6464 6093 5296 5972 3630 2650 4524 345 3339 6647
D020138	Hyperhomocysteinemia	4524 2153 875 467 4548 635 4552 2147 7172 6347 1636 348
D006946	hyperinsulinism	3767 3630 3667 6566 6446 6401 57104 3952 9370 3991 1401 2746 10135 133 3172 6347 4160 338 3383 2695 5972 5054 1906 2645 4023 6517 6198
D006949	Hyperlipidemias	2169 10628 3667 6319 336 6258 6352 5972 1234 337 348 341 2099 5008 718 2152 4353 3990 335 345 3931 4323 2181 6555 2155 5069
D006956	Hyperopia	6657 5080 2261 7291 4153 60489 919 9241 2741
D006961	Hyperparathyroidism	595 79577 846 9247 3570 7490 4221 1027 1026
D006973	Hypertension	3553 3630 652 3356 1029 1234 7076 3953 2099 2100 7077 207 65125 65266 10699 340024 27302 506 56670 3827 3600 3593 3586 4318 7432 1471 338 5327 135 847 155 100 134 3643 239 3741 1191 6546 6582 659 10203 6541 1491 5409 148 552 1588 1514 10891 56729 3636 185 3240 5972 796 4049 3359 3357 488 2952 943 3350 4153 1080 3557 1906 4023 1636 6340 6338 857 1490 257313 154 6403 285 217 6446 133 4306 3375 1113…
D006980	hyperthyroidism	7253 6515 6517 1493 56729 3484 3458 3479 5054
D033461	Hyperuricemia	4524 335 55867
D000361	Agammaglobulinemia	3586 930
D007003	Hypoglycemia	6566 1636 348 6513 4306 6515
D007006	Hypogonadism	7258 9397 2567 268 367
D007018	Hypopituitarism	6658 8820 2736 9095
D007037	Hypothyroidism	3484 5795 3630 3952 3627 7173 389434 3486 210 4043 6347 3479 6528 56729 3565 1401 7124 2304
D005922	Glomerulonephritis, IGA	3439 1906 3458 941 3105 387 185 4282 133 10673 1234 3586 5800 186 6402 183 6401 5806 4210 1490 6375 1950 1636 6296 3565 4318 6347 3934 3508 1535 3569 942 2215 3568
D007057	Ichthyoses	57104 9333 26276 3849 224
D007105	Immune Complex Diseases	2209 10673
D007153	immunologic deficiency syndromes	7070 4683 5133 5897 841 472 6387 5896 10673 3431 4261 3578 3981 1075 326 4297 79840 331 27035 4300 3683 3605 335 10659 5909 3574 3501 695 3561 5994 647275
D013036	Spasms, Infantile	7248 7249 6323 3767 4693 4160 10015
D007239	Infection	10135 28 3106 5346 6352 3458 864 3091 3565 3558 3586 4599 3627 3606 3659 254958 3577 3998 5781 4153 10392 9308 59067 6369 4363 858 5818 1950 6285 9260 2060 6441 3595 6435 7430 5443 3416 5962 3394 4478 55937 2191 1667 3459 7434 174 1026 9076 2272 3655 3949 7184 11186 3455 290 6382 842 3911 80380 11107 4179 2017 6374 467 472 3716 8841 3312 1487 25 6041 2013 7173 721 28982 6440 7436 6404 3431 3594 1…
D003453	Cryptococcosis	6402 2214 2215
	Infectious lung disease	1540 717 3553 5054 3576 796 10747 1636 3572 348 1958 1991 2252 6590 7295 3291 4586 3551 2266 1147
D007246	Infertility	405 7216 1589 57491 735 4538 718 66037 1081 4524 3269 3624 3976 3952 2153 7124 3274 3552 4276 3480 2592 367 6347 3553 57055 3991 3589 268 11036 5047 3569 2944 3570 4282 56648 332 4000 1080 355 6446 1618 3306 7180 133 1617 196 928 3426 6376 2099 6352 727 3972
D016246	Infiltrating cancer	177 5054 7076 1445 3373 7079 2592 1588 9261 26994 3838 3641 4232 5966
D002494	Central Nervous System Infections	3383 3576 6696 7097 4153 6374 2026 2633
D007251	Influenza, Human	6352 4153 6348 5054 4599 7292 3802 9970 3458 9648 7098 10859 3495 79571 1399 6356 7099 3383 10898 3586 3439 325 1398 7097 6347
D000789	Angina, Unstable	183 7099 7124 929 1401 3606 3690 5806 3952
D007410	intestinal diseases	4540 28 7100 7442 5325 6566 796 6331 7249 6356 3176 48 8976 24 1048 317
D002532	Intracranial aneurysm	2246 2006 4015 2022 2201 3569 836 7076 7077 1462 7078
D019586	Intracranial hypertension	841 2261
D000069279	Drug Resistant Epilepsy	22822 358 6323 6347 2737 6326 2944 79663
C536494	Uveal melanoma	4261 3383 3458 6285 4763 5058 1910 11315 11178 378708
D019190	Iron overload	7321
D007511	Ischemia	4240 4137 134 8996 3091 213 6285 1432 22854 598 3336 355 3308 7515 142 6647 3776 186 1906 9370 7224 331 576 660 4353 5327 2056 4323 308 133 6622 6546 4099 3778 6548 6331 6403 10131 356 1401 284 2081 596 140 3557 222962 4318 348 1440 270 3576 41 231 5743 9131 6093 7428 3976 185 4205 522
D012514	Sarcoma, Kaposi	3383 3576 942 142 5008 1909 3516 8932 5076 571 4067 5093 1910
D007638	Keratoconjunctivitis Sicca	2706 3569 356 4318 6647 6361 362 103 3178
D007640	Keratoconus	6273 2014 6649 6590 1178 6667 362
D007642	keratosis	1514 2261 1509 1950 596 595 7220 1026 9342
D007680	kidney neoplasms	4584 916 6421
D007674	kidney diseases	185 183 3991 10911 5076 5311 7124 1029 4153 7076 4311 26585 1191 10087 3384 4627 199 1497 9370 5950 7466 2121 493856 1400 2169 3576 4583 29126 1524 5133 1839 1906 1636 6338 249 3952 1490 9409 5830 2212 718 6446 4036 1535 59272 359 624 4586 5747 6495 2255 3623 6510 7173 11136 6519 9581 6524 189 9380 9982 6337 4010 9356 9376 3987 6092 462 3758 54
D051437	Renal Insufficiency	3586 1401 3303 3251 10525 5972 1471 348 6279 217 135 6280 4162 4609 11093 6314 259 554 393 6401 3383 56729 7422 7099 2152 9332 4353 9365 5806 6521 57817 3385 6359 3569 79602 213 3689 595 846 6513 9619 19 3684 5444 5745 29949 1610 860 3552 3553 4524 6352 2944 2952 2950 3565 1234 6696 6347 7097 3557 2056 338 2099 1950 2215 6464 5820 1113 118 100 3816 27130 522 148 146 6573 147
	Kuhnt-Junius degeneration	2952 2944 387715 1471 6648 2950
D007822	Laryngeal Neoplasms	3106 3569 3576 5045 1191 406960 79893 2052 11132 4257
	Late pregnancy	3767 2100 10060 5327 3630 3764 5328 9370 5950 3479 2099 1401
D007859	Learning disorders	348 9801 11192
D007888	Leigh disease	374291 6427 4719 4537 4508 4724 522 4536
D007890	Leiomyosarcoma	9332 800 6302
D007918	leprosy	7124 3105 4049 7097 910 6556 6504 4276 3586 5071 6356 3593 4153 56244
D007938	leukemia	3576 10006 22807 1482 3559 5819 3207 60468 5817 3552 356 3577 8871 3687 399 943 196 2026 10401 57142 3727 1233 1154 4277 10644 861 4602 4297 5777 3662 25925 10320 3492 22806 2120 5078 55872 1050 728695 7088 862 257144 1043 3195 9021 1991 8835 3439 9141 2122 4067 1399 3206 8863 5004 5026 59335 405 5054 796 3586 6347 3115 80705 3716 10411 3574 3899 3981 4299 27125 440 6402 3569 64127 3565 3558 4552…
D007966	Leukodystrophy, Metachromatic	8890 4358 3329 8892 8893 411 1118 410
D056784	Leukoencephalopathies	7422 6387 8893 2639 1977 3569 1436 2152 1991 8797 332 4609 5371 11200 641 4361 5914 1387 4773 5074 7161 4069 4331 902 6688 11073 1452 28996 7323 1660 6672 1613 2000 1053 7318 6304
D007970	Leukopenia	28234 1050
D020961	Lewy body disease	10376
D008010	Lichen planus	55894 7124 3458 4318 596 4314 3620 4313
D008060	Lipodystrophy	3177 9370 4000 2688 9154 3952 2030 64078 355 56729 9153 7124 6347
D008064	lipidoses	6620 5867 57104 1893
D008113	Liver Neoplasms	7124 5321 9368 26354 5940 4494 4440 216 55876 2182 10272 3679 63970 56984 6401 3383 2678 3106 3479 3458 5054 123 3105 3315 3565 9536 1234 6347 1524 356 1230 213 3604 4153 4314 4276 2147 7076 3119 1401 1636 941 27232 3484 2052 348 3952 6462 1997 3117 1490 142 3329 5300 6364 6348 3559 217 6647 2688 4018 3303 335 4547 345 6464 3570 434 4208 210 654 48 6558 2705 5887 27343 3516 1843 10224 2181 2947 5…
D008107	liver diseases	3458 3875 2056 2235 27232 3489 5322 3572 3627 3484 5314 2950 3606 4358 3315 1234 249 7097 3856 3486 9370 3479 2052 5062 2244 2678 3485 3481 9563 1471 3569 540 348 4524 5054 6356 6347 2153 2147 5327 1490 257313
D017093	Liver failure	355 211 34 2638 3606 9104 5428
	Liver metastases	3552 10097 7076 2152 7082 6364 7295 1113 3456 5126 10163 5122 383
	Liver tumor	8795 123 3315 9021 3484 3329 2688 4018 335 4547 345 3570 434 210 654 48 6558 57586 652799 2705 10635 5923 229 5887 27343 3516 9965 1843 3625 10224 2181 10468
D008133	Long QT syndrome	3784 3757 6331 3753 287 3751 6640 6262 3752 6330 859 10142
D008175	lung neoplasms	3371 213 1054 3959 3646 246100 4103 9947 7076 360 4361 5074 659 259 5921 7084 9988 3699 3364 10863 3383 2668 3576 796 4521 3373 9254 9940 11162 6303 5957 2026 9024 3587 65108 5910 10181 5834 6656 11145 1832 177 5054 3673 3558 4153 5327 5008 4319 4353 4321 3559 6647 1476 10016 11334 11082 1475 6405 31 57007 32 27436 1140 1400 6352 3569 3565 1234 4023 3572 1490 154 267 1917 196 2170 64866 80279 198…
D008171	lung diseases	1668 3676 627 64127 3682 3630 3600 3593 6356 5133 727897 6441 6439 6361 6435 3932 780 2729 2187 6440 4613 3784 6436 729238 1039 21 904 2054 276 4026 5890 6189
D008178	Lupus Erythematosus, Cutaneous	185 6352 183 6696 7076 1401 1636 1997 2099 939 29851 3603 1113 5027 919 8870 7167 720 1390 3500 6625 1038 3501 3553 6401 3383 56729 7100 3106 4261 6648 6402 3458 1493 7124 3105 796 26191 1956 3565 3558 3586 1234 355 3606 943 29126 356 4282 5133 3725 56244 4153 10 2147 2209 3557 3119 9308 4650 2214 3605 9 4548 3566 348 1543 6285 2212 3460 940 596 6403 718 10544 1991 2215 10673 836 3559 920 6647 84…
D008177	Lupus vulgaris	2099 2212 939 7076 355 8870 6352 3500 1390 3569 183 6625 356 7167 5027 5133 1038 4318 1401 1636 185 6347 1997 6696 919 3603 3501 4282
D008193	Lyme disease	2026 3329 6373 3569 6347 4312 7097 3553 4322
D008207	Lymphatic metastasis	4314 2152
D008223	lymphoma	1493 840 3586 59067 567 6660 257144 327657 3455 55872 4773 11201 27434 2120 10673 4306 1437 861 10018 2623 4297 3107 639 6688 862 63976 10320 286530 3492 22806 4330 3110 6566 3565 3606 943 1524 6373 4314 3559 2650 3932 3394 5126 6708 7247 3592 2625 196 7185 5122 6046 64421 5981 2026 57142 27086 3661 10051 10592 6573 3738 5800 8864 5753 3916 1233 921 22807 3601 9962 3665 9963 602 5134 2262 3726
D008231	Lymphopenia	598 355 6375 940 3574 3600 3558
D008232	lymphoproliferative disorders	10803 2303 10659 7096 10320 5781 4283 10563 4068 6361 604 6624 6375 4065 695
D016464	lysosomal storage diseases	7345 57192 1200 6622
D008268	macular degeneration	7439 2202 6401 3383 3240 7422 7078 6347 1524 7099 1401 1636 4316 1471 348 718 688 4040 59338 10878 7436 717 2074
D008288	Malaria	3557 6376 7422 4312 1490 3454 26762 3383 3240 7124 4282 348 4233 154 5028 360 823 197 5313 1181 6521 57817 824 8876 259197 6362 1536 3251 6708
	Malignant childhood tumor	2162 2157
D051677	Histiocytoma, Malignant Fibrous	1839 685
D005910	glioma	5054 7124 811 3565 29126 356 4552 2147 3566 3572 5008 6364 4321 5045 1634 182 3678 7341 11315 3597 3925 6670 55859 1032 9806 10124 10963 65065 9294
D044342	Malnutrition	7274 6343 254428 3569 3557 1471 4160 847
D008415	Mastocytosis	7177 64499
D008545	Melanoma	7124 4049 4322 267 3383 1234 7076 1906 941 3572 840 3622 7114 9947 1908 3553 177 6352 5054 3673 3105 3576 811 6498 6497 3558 3586 3606 6347 356 7099 6366 4055 3577 4314 4276 942 3689 9021 10803 142 578 29851 2152 7082 834 10399 1649 567 5443 64135 3684 434 7293 728642 3456 5027 4162 5077 1462 3579 10468 10253 4100 80705 10861 2583 5366 3996 3716 8945 3592 6548 1191 3676 29071 3936 3274 3718 9500 …
D008579	Meningioma	1514 3105 4552 7076 4548 249 6285 2152 875 5981 412 2035 3912 6098 200895
D008607	intellectual disability	2688 186 2182 401 9968 10084 64219 378484 6594 641339 5063 266678 5978 65267 55998 10075 5355 2245 340533 6611 5879 3913 4763 100 477 359 1915 9126 6493 64324 7080 6197 10642 3198 6683 6658 773 2731 8851 546 79147 3908 29954 80208 6405 11279 1641 22829 5864 9980 11141 64220 10445 1218 57545 7102 266743 406874 9856 9901
D008654	Mesothelioma	3852 57099 10121 3673 5443 1207
D024821	metabolic syndrome x	9370 1401 3486 3586 1489 345 1636 197
	Metabolism disease	9370 2244 1636 155 1401 10891 208 617 158 2641 5054 4318 5770 3569 4314 154 3091 10165 5837 3630 10135 6517 231 387082 4023 338 3767 3172 2695 2645 567 3375 197 4000 48 7507 10599 445341 288
D011127	Polyps	634 5743 673 6422 1030 4292 3630 1026 4588
D008198	Lymph Nodes	3576 7076 9021 1490 12 3329 4322 1435 920 133 6515 567 4478 4317 1462 463 56999 10146 1936 3996 3336 9770 2172 11004 310 1830
	Metastatic cancer to brain	3240 335 7276
D008881	Migraine Disorders	4224 2099 6005 3350 1636 6532 3569 4524 3358 7124 367 3383 6531 3689 3552 3683 796 1493 4049 773 627 477 3782 3949 6323 10267 7166 3643 358
D028361	mitochondrial diseases	4558 4519 5428 9997 617 4151
D017237	Mitochondrial encephalomyopathies	4513 29078 1890 6046
	Mitral valve disease	5328 3559 100133941 3554 2200
D008949	Adenoma, Pleomorphic	79187
D009069	movement disorders	540 4015 4017 475 5368 6622 2571 125 2572 5071 4204 8910 3778 57338 1861 64342 2112 80025 7337 10479 1474 10886 6311
D009072	Moyamoya disease	4524 7077 7276 3091 2022 836
D009080	Mucocutaneous lymph node syndrome	4314 1401 1636 3107 3105 6556 6349 4318 4153 185 3586 3791 7076 1234 6283 4322 80271 7124 7422 3565 3106
D009083	Mucopolysaccharidoses	2588 1387 6232
D009377	Multiple endocrine neoplasia	4221 6530 5979 269 1113 6571 6570 6118 1027
D016609	Neoplasms, Second Primary	1493 463 9770 57531 26154
D009101	Multiple myeloma	3572 3553 4261 3458 7124 627 3105 4049 3315 1234 356 4153 4552 4276 7076 3557 7494 374 940 5008 6364 3603 6348 3595 846 5788 3570 632 259197 3454 1540 3455 10666 5366 4094 6351 3590 1116 4067 9437 259 7518 54 799 1513 9947 25937 9846 728695 7468 55959 3981 57823 608 9802 7187 3535 3507
D009103	multiple sclerosis	3553 3383 4540 6352 3458 5054 7124 627 3105 3576 64127 623 3593 6469 2944 3596 3558 1234 4599 3620 3606 6696 1524 7099 3659 929 56244 4486 4314 7076 2214 3605 3953 5970 4277 330 941 3952 5327 940 29851 6376 598 4353 7077 4321 834 920 2 6387 4567 7351 100133941 7293 3575 3579 7434 3672 331 4179 329 794 2150 4508 4340 4155 6506 7167 57142 5409 6404 2739 3568 7177 925 5816 3738 11240 3107 27189 5819…
D019578	Multiple system atrophy	3383 3576 1621
D009133	Muscular atrophy	9774 4574 7169 2273 831 3600 2308 4593 6647 2010 367 4000 868
D009136	muscular dystrophies	4000 79147 7273 3908 57190 6606 6473 1490 10468 302 2010 3679 301 825 859 7124 3643 9126 3181 9774 10020 272 3178 3301 9578 10658
	Muscular dystrophy	8837 6443 29954 6445 4313 7076 3339 7077 824 8842 2660 25891 9672
D009157	Myasthenia Gravis	3593 10563 2099 2100 1515 4593 80381 246750
D011019	Pneumonia, Mycoplasma	7096 10333
D009181	Mycoses	3439 348 7124 796 7099
D009182	Mycosis fungoides	1493 7099 7097 3115 55894 3385 10850 1036 26052 6366 59067 10563 920 2043 3802 10859 3804 6363 5358 3812
D055728	Primary Myelofibrosis	3576 3577 4322 654 4317 3579 267 2200 9759 2289 649
D055728	Myeloid metaplasia	3576 3577 3579
D009196	myeloproliferative disorders	3563 3717 5781 2623 2260 3718 613 2033 2057 9241 11083 4602 57126 4352
D009135	muscular diseases	6401 475 7494 673 6622 2571 4137 6326 2182 5979 4747 6323 6334 10558 378465 6683 255239 2720 57679 80025 285489 5913 1134 3785 6606 8878 4671 246744 4287 26580 4741 6607 9997 7317 10956 538 488 3589 154 6647 57104 823 3679 2273 2010 6709 3920 4684 773 4625 6329 4556 859 7084 4620 4514 4550 1145 10599 4566 2110 4621 6261 1410 79147 3759 7314 5081
D020967	Myotonic disorders	3339 1180 4535 773 4537 2643 478 7167 60 2644 6697
D009290	Narcolepsy	3952 9575 727699 3119 4600 3438 7124
D009303	Nasopharyngeal Neoplasms	3106 3458 7124 3569 3105 3576 3586 6347 7099 7098 3304 4276 942 941 4057 9940 56999 586 9770 64946 5074 283120 1910 3965 7187 10383 344967
D006258	head and neck neoplasms	6402 1026 27113 5979 1543 595 598 3373 7517 6273
D020345	Enterocolitis, Necrotizing	1950 7099 4314 7124 3566 4282
D009362	Neoplasm metastasis	3553 6401 3383 1514 10891 79068 177 3636 1400 3458 843 5054 7249 9536 3586 3606 356 1230 3651 6372 2147 1436 10747 6369 3953 1636 1893 1471 5783 6285 10803 5008 6403 5320 6489 6348 5045 6590 7450 2303 3570 4041 654 57125 6383 5077 3959 2705 10468 267 4325 6093 9788 10553 4059 3308 182 3692 7103 27076 4437 1512 467 5338 4094 9423 5310 6277 3592 6035 2047 11093 10988 64866 1902 3934 2150 3694 5961 …
D009393	nephritis	6347 3815 27063 4254 7490
D009396	Wilms Tumor	467 27241 4591 5936 10664 11281 9589
D009401	Nephrosis	3606 5970 4094 3913 3953 29094 3340 6357 3263 3553 7124 2153 337 673 348 2152 1071 100 1191 3554
D009422	nervous system diseases	356 3383 355 4204 26353 2683 361 6622 351 4137 6323 5428 317682 286751 150
D009423	Nervous System Neoplasms	5764 29103 57534 3630 64101 575 9334 63827 3371 2185 2670 4601
D009442	Neurilemmoma	58191 7075 10663 20 9146
D009443	Neuritis	1234 355 356 7077 5414 8877 10801 6242
D009447	Neuroblastoma	7466 2668 6347 7099 3952 10257 5300 116 6647 1644 1131 7276 52 7220 1843 5371 842 5366 27101 1387 1072 1139 5074 1996 2035 2026 8929 241 1128 80381 1025 11013 7323 5127 378708 3645 10691 481 1653 663 9118 401237 1995 4605 5293 407040 1660 6672 26038 55885 11230 257 1613
D019636	neurodegenerative diseases	6622 351 4137 5300 4747 643387 11315 8878 156 6311 25978 246744 10273 2668 348 197 65018 841 824 6343 4254 7471 5414 43 7341 3778 2597 1859 3748 6432 65055 10084 9627 1201 1627 642 11076
D018358	neuroendocrine tumors	3569 6530 1113 8836 27087 1082 79054 333
D017253	Neurofibromatoses	4763 4254 3815 4771 2026 2668 339 3799 4192 338
	Neuropathy	4036 1152 9990 9896 57716 378465 9517 4137 6326 4000 9927 4359 6323 79628 4665 9499 10558 4664 5428 56652 6606 246744 6607 177 7442 213 6622 2571 4535 9516 8898 494513 9381 909 9342 710 56896 5354 4541
D009497	Neurotic disorders	6532 255239 7494 267012 4128 4153 60489 919 2741 4158
D009503	Neutropenia	1991 3458 10747 1440 9401 1441
D009508	Nevus, Pigmented	434 2147 3484 6596 2720 6006 6007 2159
D009765	obesity	6401 3383 7124 151 6447 64102 79068 2678 5950 56729 9415 5346 185 4524 2169 4313 7422 5972 3479 3486 183 5054 627 3569 3576 7442 6566 796 6532 3356 3091 3586 355 3606 6696 6347 79602 4282 4318 3304 4552 4314 3557 337 1401 3689 1906 3953 3481 1636 9021 4548 3489 3572 3952 6462 2099 595 154 351 2 2638 3667 57104 3991 133 4160 6513 11132 3291 590 2688 3990 208 4018 19 5087 3290 7350 2572 4547 7351 3…
D009771	Obsessive-Compulsive Disorder	5315 3569 6532 26047 3356 6581 3359 627 8910 6505 1861
D009845	Oligospermia	675 367 1617 29118 442867 283120 133 1618 2952 442868 1080 5428 2678 3623 9083
D009896	Optic atrophy	778 80207 1956 2052 4541
D009062	Mouth Neoplasms	1956 3821 5133 5743 2064 7428 3553 3371 3673 3576 4255 7515 2944 2952 2950 1029 3565 3586 1548 3606 7099 4318 4314 3481 1027 4316 1499 648 857 595 4322 5328 6387 1030 1634 79923 3480 4609 1026 2272 2947 7517 682 6615 1890 10631 7516 5745 7518 3965 5094 4133 2195 220064
D010001	Osteitis deformans	8878 595 1906 2194 2064 10020
D010019	Osteomyelitis	3459 2159 4297 5894 7100 861 1186 581 1843
D010024	osteoporosis	4524 796 249 4057 655 1471 246 3815 3952 3381 4041 3655 2099 3479 3383 650 4322 6696 3552 2100 2688 7189 197 860 2185 6462 2638 1543 5443 3480 176 3640 3290 55867 1594 632 799 1588 3672 367
D012516	Osteosarcoma	3576 4276 1490 65059 9184 3479 8856 3615 1634 5923 1947 3676 308 2224 7341 59 6573 4543 815 2197 10210 9401
D010033	Otitis media	80204 6435 3553 7124 2070 604 3576 727897 4585
D010051	ovarian neoplasms	8826 10023 1191 4174 10891 2678 3117 4162 2071 7516 874 4615 814 5893 3552 3553 540 185 3458 5054 3569 796 3565 3606 29126 356 4282 4314 3557 1401 1906 2052 348 5327 1490 2246 5058 1909 6590 133 3291 3698 9940 5071 6093 182 1917 6303 4437 3643 861 1495 43 3678 9170 6041 2175 3976 1394 26135 1392 3640 4513 3574 2592 2621 1588 7448 6036 56648 4052 538 2101 56946 9846 11279 11202 2041 2188 7251 2253…
D010049	ovarian diseases	2719 2626 1028 2006 3586 4318 3855 2099 2100 2688 81 407008 2067 7507 268 6662 269 2271
	Ovarian failure	2661 431707 4438 2592 79983 3623 9210 594 668 268 3625 2304 4439 4254 344018 283120 2099 342977 11144
D010051	ovarian neoplasms	7124 3576 3600 3596 7076 2252 834 820 5045 1843 3934 837 3364 64073 10406 5883 6418 10857 26271 56413
D044343	overnutrition	3484 338 1071 477 229 3949 5295 3676 3763 3760 1043 178 3768 2632 686
D054973	Perivascular Epithelioid Cell Neoplasms	7249 909
D007645	Keratoderma, Palmoplantar	2697 9342 284654 1832 3857
D010190	Pancreatic Neoplasms	5327 8839 9154 5054 3856 6277 633 886 3181 5074 6286 3458 3105 59340 6608 10057 3976 10411 7307 2665 10136 10983 3977 11255 3552 177 2668 3673 7124 7249 3565 356 58191 4552 9231 760 4772 10628 3566 341 1490 2152 2252 4353 1435 3559 133 3570 2740 632 7071 3454 3455 1848 6093 9002 6477 9775 2625 11054 3934 2150 7114 10678 11282 7516 9500 3549 4217 101 5378 6041 1431 4099 10112 6695 10755 128 5909 4…
D010182	pancreatic diseases	3630 9370 6648 231 387082 3651 5802 3952 834 3265 6181 217 1649 3767 2746 3172 2645 1644 3375 1990 81 64399 79679
D010195	Pancreatitis	6347 3304 1056 125 1029 3627 6696 5970 4233 8797 10321 3845 116 2022 3458 1493 2944 2950 3856 760 1543 3559 846 11330 23 920 217 3297 6401 7124 4049 2952 7099 4282 4153 1906 4023 6403 1909 2 6647
D016584	Panic disorder	1395 3350 6532 1392 3359 267012 885 2099 2006 3356 4128 886 135 887 2739 1390 6530 3939 706 282706 387129
D000231	Adenocarcinoma, Papillary	2150 1956 9435
	Papillary cancer	9780 5076 1965 4103 10142 7227 5933 6281
D030361	Papillomavirus Infections	2064 1026 1029
D010272	Parasitic diseases	210 3459 332 6318
D010300	parkinson disease	4540 7076 350 65018 7345 1139 2629 11315 1137 478 1103 4287 3658 10211 1863 3553 3630 4524 3240 3458 3576 7249 2944 1029 3586 355 6696 5925 10 3481 1636 9 2052 1543 2099 142 347 2100 5743 598 885 126 6477 842 887 26281 1869 3269 27429 4345 886 4217 4694 1996 4536 64342 2643 6697 2053 5816 9627 6315 25897 5072 4739 26994 3313 79705 391634 347902 2674 793 6620 441549 7299 442890 8880 4025 219402 40…
D000292	Pelvic inflammatory disease	643387 9219 6622 11253 3458
D010409	Penile diseases	6347 1401 3265 3845 3690 2272 3672 3732
D004942	Esophagitis, Peptic	7515 2068 2944 3577 3579 2950 2952 3576 26525 6347
D010437	Peptic Ulcer	623 3593 10392 3176 100 3939 6343 1478 624 6401 7422 6402 4049 3557 5328 9254 60489 354
D010510	Periodontal diseases	3557 3589 1471 4353 5054 10 1401 3605 249 4322 5328 2252 6364 2215 3603 671 1075 4256
D010518	Periodontitis	10673 3552 6441 836 2212 3589 7077 3586 3565 929 3106 4321 3605 2944 7099 7124 3553 64127 3458 3595 4313 1543 360 1075 4318 3105 4314 4057 1435 2952 5327 7097 2214 3596 840 4312 5743 4353 3603 1511 3559 6279 5048
D018317	Nerve Sheath Neoplasms	4322 10663 653 651
D018317	Nerve Sheath Neoplasms	4763
D014917	Whooping Cough	3689 5294 3383 3684 710 3678
D002659	Child Development Disorders, Pervasive	57502 57526 552 267012 3198 387573 6532 438 4233 4282 4139 5020 1610 2020 324
D010698	Phobic Disorders	135 367 5027 10645
D020774	Pick Disease of the Brain	246744 9588 134 4440 5052
D018296	Pilomatrixoma	3886 3881
D010911	Pituitary Neoplasms	4760 3953 3291 10647 10590 3569 796 7099 142 2688 2690 10912 9049
D010922	Placenta diseases	285 1028
D011009	Pneumoconiosis	2064 4314
D001168	arthritis	4153 3115 721 9370 652 3371 5054 4312 3576 7442 5321 3091 6356 9536 4599 7099 7097 3577 7432 4314 1906 3605 5970 9021 10563 3952 2099 5743 598 4322 5328 567 6387 1535 1113 2191 10855 4088 7434 1026 2034 8838 3551 4616 2274 6282 919 1994 3934 3678 3574 176 4150 7167 9572 1588 7177 1147 7072 282618 9507 4148 8974 653 11096 10457 388 80213 1555 282616 2588 1513 6662 9641 6574 5033 801
D007690	Polycystic Kidney Diseases	5310 4750 7249 5314 27130 3479 1080 348 118 3579 6558 3934 1910 10537
D011085	Polycystic Ovary Syndrome	672 668 4312 4057 3630 10135 5054 3569 4160 2688 3643 3283 1589 10580 3552 10891 79068 56729 6517 4524 4313 7124 2944 2952 79602 2153 7076 3557 1401 9021 3484 5327 1543 154 3845 3767 3667 11132 151 207 354 885 3625 10468 5329 3491 2627 3294 412 3292 3206 726 9882 1551 9210 5921 6654
D011086	Polycythemia	7428 1636 3717 2056 2057 3091 4352 1906 3479
D017285	Polymyositis	3600 10578 10438 3553 1234 7098 6366 9308 3605 6279 1520 1158 26280 6363 322
D011115	polyneuropathies	7276 9927 4358 4771 11315 5428 4099 2584 7422 6283 19 335 1959 215
D019318	Porcine reproductive and respiratory syndrome	7097 654817 7099 10392 4688 1535
D011225	Pre-Eclampsia	3383 6648 7422 2022 6402 3458 64127 3600 811 2944 3091 2950 3565 3586 3627 355 2247 7099 7097 4282 4318 10 1432 3481 3484 2052 3460 3603 1435 1909 6647 155 5443 8862 100133941 2167 100 72 1634 1118 1462 8858 3625 10468 947 11186 9166 3491 3624 1942 1191 1116 633 3976 10761 2689 391533 1394 187 6581 29124 3626 7162 11346 26135 6510 1392 1082 3640 666 5837 219736
D047928	Premature birth	3553 4049 2149 1392 1543 2056 3557 154 1636 185 4153 2952 29124 7099 5972 2944 1401
D008105	liver cirrhosis, biliary	3383 3683 1493 3105 26191 2950 3627 3620 355 7099 2162 4283 3952 3717 1543 4363 1997 3117 4064 2120 858 6504 4068 6622 2099 648 250 1629 939 857 5783
D049950	Hyperparathyroidism, Primary	133 846 3784 5979 1956 3688 5747
D009382	Neoplasms, Unknown Primary	3479 3856 6690 7076 1906 2152 1909 3932 2191 5071 267 467 5793 56937 10755 79728 412 5076 909 8900 9241 3587 7258 799 7447 406960 6405 1025 9134 7168 7112 4175
D017096	Prion diseases	351 4137 3329 5743 10971 2
D011471	prostatic neoplasms	3708 10499 10036 7124 367 354 675 2067 487 1618 1617 490 29118 1234 7494 154 10321 6319 8878 2078 64478 7316 6134 2950 3485 1958 5328 283518 2065 6335 5104 10498 2115 414059 3600 2246 12 6279 3303 6280 4325 3938 1387 3623 1082 407007 10893 9897 407006 4326 283651 4324 5885 3479 7076 1436 6019 4502 467 5335 4549 3678 2150 4513 4508 148 27086 3587 7258 799 653 4733 59351 11140 7251 26136 1102 57728…
D011488	Protein deficiency	2038 8858 215
D011502	Protein-Energy Malnutrition	4171 1029 928 1462 5108 3479 3953 3952 6462
D011507	proteinuria	10855 5806 3240 2152 7490 11346 183 3263 81 1490 6347 1184 1636 4306 4018 133 9370 59272 6550 1027
D011528	Protozoan infections	3567 1508
D011561	Pseudoxanthoma elasticum	3383 6402 4363 64131 368
D011565	psoriasis	6280 3107 4276 1543 64127 3806 3106 26191 3105 6283 1636 7124 2022 4049 3553 374 6279 3566
D011618	Psychotic disorders	3356 255239 6311 348 27087 6532 6536 267012 27185 6285 627 12 207 9463 4129 6648 2950 3782 2571 351 6531 10935 1139 5074 1621 1137 1861 1114 3362 1610 1141 8878 25978 6571 27344 246744 5999 10611 553
D001763	Blepharoptosis	2100 668 7291 2261 4313 2006 4312 1634 3915
D011649	Pulmonary alveolar proteinosis	1512 6435 3586 1471 6441 9476 1437 9619
D011655	Pulmonary embolism	2162 1401 64805 5345 213 2153
D011658	Pulmonary fibrosis	6347 356 6362 2149 6435 4313 4316 3567 3479 857 1906 6352 2064 1435 7124 2065 6356 374 9353 3574 6446 355 6317 3481 2147 6387 627 2054
D006976	Hypertension, Pulmonary	6532 7432 3741 659
D011704	Pyelonephritis	943
D011818	Rabies	2157 10891 4040 659 311 26002 1409 6646 350 1200 3489 284217 498 3784 6548 6439 6006 4598 123 4207 79001 554 2266 1512 5308 22820 6007 777 672 28983 2006 2099 6440 7253 351 10226 3484 2661 1421 912 820 5045 2158 2155 1180 9094 1667 6035 2651 58155 3679 7428 7433 4069 1548 831 6252 367 1906 2040 4316 6622 10016 7220 4088 1121 462 587 598 836 857 811 5824 50 7073 3375 6324 9734 10933 1604 64078
D012004	Rectal Neoplasms	5961
D012004	Rectal Neoplasms	348 2152
D002292	carcinoma, renal cell	5058 3932 4012 919 27101 11082 1909 6596 201163 2739 79960 9227 3479 1493 7124 3569 3315 3558 7098 58191 4314 1401 3489 2215 4057 4306 567 3291 26762 2705 1843 3455 10459 3308 7345 1191 10825 27429 8996 1082 1910 445 5104 659 3910 6271 7223 3587 80381 26287 6646 1523 2173 10991 3795 5901 7481 11170 10053 79814 80333 55845 39 5364 4495 307 442459 6484 4286 79109 4105 3249 1602 4108
D000141	Acidosis, Renal Tubular	3516 3569 6597 6521 7341 2099 9968 142 9063
D012128	Respiratory Distress Syndrome, Adult	4282 6439 3291 1636 3553 2152 5054 3569 356 3576 6441 1906 355
D012131	Respiratory Insufficiency	4628 6442 3586 3303 6337 3371 2150 387129
D012140	respiratory tract diseases	3596 6285 6441 6439 820 6435 6440 6436 10568 4318 1080 347 3456 134 201163 56171 25911 6257 3661 57506 10051 10592
D008228	lymphoma, non-hodgkin	3578 238 842 57714 833 3718 836 10894
D012164	retinal diseases	6422 6295 2192 5961 6011 6017 5959 6121 10461 6314 2668 494513 10002 6103 10692 9600 7287 3614 27031 582 9129 5995 4016 4653 6247 3091 213 2153 1839 3117 1535 5444 24 3480 8842 3791 1910 343035 25946 64218 4693 28976 3920 57096 6010 5957 778 80155 6310 4356 1527
D012174	retinitis pigmentosa	6101 10692 6010 10594 9129 6295 6103 3614 375298 27130 26121 762 57096 6017 5961 6121 585 6100 9126 58538 692221 64072 6102 5132 24
D012175	Retinoblastoma	3553 3856 8900
D015518	Rett syndrome	4204 3398 3397 627 22854 3399 3400 5348 4152 3952 2290
D012208	Rhabdomyosarcoma	177 2169 8795 3489 10673 5077 4654 9241 26287 8850 4656
D012213	Rheumatic fever	3383 4586 5329 3119 10747 3117 2215 3106 3586 1432 1843 6005 6006 6007 4052
D012216	rheumatic diseases	387082 4210 7291 4137 6326 2152 1387 5745 6323 660 3822 4615 871 2219 3184 6606 246744 6607
D001172	arthritis, rheumatoid	3552 3553 6401 3383 9370 56729 652 185 4524 928 6352 4313 843 7078 5054 4312 7124 3576 64127 7442 3600 5321 5879 3593 4049 3356 7515 2944 2952 6356 3565 9536 3558 6696 943 29126 1524 929 7097 4193 301 5925 58191 3725 56244 3604 6583 4153 7432 6584 10 4552 4314 1432 942 9308 9966 59067 7433 2214 3689 1906 3605 3953 3481 4772 941 10563 1471 348 5327 3717 5783 1950 142 940 596 154 29851 5008 6403 28…
D012480	Salmonella infections	5879 6048 10096 71 10097 7100 3593 8826
D012507	Sarcoidosis	59272 6362 6374 3553 6401 3371 7124 64127 4049 3606 56244 10392 942 1636 941 6348 1215 1118 1026 3440 1116 3305 3514 8809 7297 3500
D012509	sarcoma	7431 4157 2162 1649 7486 10644 6277 2242 3549 2157 2073 6297 7480 466 10342 6496 79058
D012555	Schistosomiasis mansoni	3383 1432 6348
D012552	Schistosomiasis	1437 596 3586 4193
D012559	Schizophrenia	3552 3553 3383 4540 3106 4524 6648 3479 2668 7124 3105 5321 3593 4049 3359 2944 324 2950 1956 3565 3558 3586 1234 3606 6347 3725 4552 3563 3557 3119 7494 4650 3953 3481 1636 4277 1622 3952 2099 4522 1950 5320 347 2100 116 6647 135 6667 133 1644 4535 367 335 2572 688 7351 5443 207 9826 7276 1113 3674 5444 1544 1848 780 4090 5414 2065 2066 329 27121 3269 3554 1116 886 4099 10371 57369 5354 7436 150…
D012595	Scleroderma, Systemic	3552 5394 6498 10438 5393 9354 2022 4092 6317 5055 100132285 3806 9475 57154 3803 6093 857 4282 6497 4088 2033 1490
	Sella turcica tumor	5443 5122 3976 4158 9049 9146 10590
D018239	Seminoma	1594 356 1082 199713 6660 56286 3940
D018805	Sepsis	3569 1401 3480 10468 923
	Serous cancer	3458 10023 1191 10011
D045169	Severe acute respiratory syndrome	3569 3105 5925 1432 1636 598 947 896 3385 1999
D004405	Dysentery, Bacillary	3688 3553 1991 9844 2706 3576
D012859	Sjogren's Syndrome	5133 3553 10673 3586 6709 7295 10321 3456 355 3933 3439 4283 10892 6416 3605 10563 10750 29126 7498 356 350 3708 6366 3725 57379 3383
D000755	Anemia, Sickle Cell	6006 4353 3606 384 6319 3783 5743 383 3688 4059 4524 1437 909 3386 3486 3952 6403 3676 79966 154 3480 4057 911 910 2153 28981 3479
D012829	Silicosis	355 2950 7124 6441 3119 3593 356
D012852	Sinusitis	820 727897 4590 3593 1182 10673 1181 58985 6439 1080 3592 4317 4313 4056 3567 3576 4318 3596 4586 3565
D012878	Skin Neoplasms	4313 4157 6648 7076 4087 7515 1432 6318 7077 6278 1956 4318 3958 3586 5781 6285 643 6608 10810
D012871	skin diseases	10850 3606 2707 4282 11005 4318 2706 10804 199 56477 3552 4174 368 27179 3620 9971 2162 4023 858 5313 389 6502 6615 7248 672 6612 1593 3560 7299 7306 4157 9068 200315 9582
D012878	Skin Neoplasms	4059 6278 27040 4103 4157 4327 5429
	Solid tumor	3479 3458 3565 5781 3557 2045 2159 2073 2188 28444 9255 10085
D013118	spinal cord diseases	647859 5358 6434 11218 3383 1524 6285 2572 6303 4771 3107 7317 3630 3479 3315 2688 6687 4744 1639 10908
D016135	Spinal dysraphism	4524 4552 3098 1592 5130 5077 9 6573 7351 652 6513 1119 4522 3953 5110 3720 1072 672 4548
D020754	spinocerebellar ataxias	4287 3708 6310 10273 6315 773 56652 6314 25894 7274 2259 6311
D013158	Splenic diseases	55997
D025242	spondylarthropathies	3106 64127 6556 1543 9332 9365 1462 8840 11240
D018307	Neoplasms, Squamous Cell	5789 79370 653499 6278 5966 1855 9338 3553 1514 177 2678 4017 28 3458 57016 7249 3315 3565 9536 6347 1230 3875 4314 4276 1906 941 374 2052 1490 578 10970 5300 4322 6348 1435 3559 920 217 6647 133 847 3373 4478 6280 79923 5906 55894 6294 10103 4100 3858 10146 7507 9770 252969 3678 3694 1116 7341 3280 1910 7122 1999 10901 5345 7084 9641 3925 1103 3820 1138 284654 4103 3965 3852 66004 5753 4738 3872…
D013274	Stomach Neoplasms	3557 1649 9141 771 6138 3383 7100 3673 29126 3589 727897 834 641 80177 5361 2170 6351 5423 11124 64753 10562 6548 3590 3887 10892 4504 2047 656 9994 2045 10111 3552 6401 9370 177 185 6352 6402 183 1493 5054 7124 623 3593 4049 5307 6347 356 7099 79602 4282 4153 7076 3119 1839 3953 1636 941 3952 3117 1490 3460 578 5320 4319 5300 2152 2252 840 6361 6590 3426 3654 3710 4088 3959 624 26354 1843 57019 …
D013272	Stomach diseases	3576 5967 4277 4353 6647 7498 643834 604
D020521	Stroke	4353 187 3383 2169 3486 7124 2944 2247 5970 1543 125 2168 4192 3957 6098 3553 5346 5972 3673 627 4049 6532 3356 7515 2068 3091 1956 3565 355 3606 3350 1524 7099 929 4318 3557 3689 1906 338 5327 3717 2099 596 718 12 5320 10544 5743 4322 9365 3690 3570 7274 3674 2690 55829 10855 8858 3949 328 6093 2149 4320 9927 875 412 3292 867 41 2165 241 2053 9446 727 2621 255738 2157 10166
D013344	Subacute sclerosing panencephalitis	3569 4318 7076 1636
D013345	Subarachnoid Hemorrhage	358 3690 154 348 153 6093 1906 627 2670 2006 361
D013398	Sudden Infant Death	6550 6023 3569 6532 9992 6331 3759 3753 9132 6262 3785 859 3784 8929 3586 836 3757 10011 3350 3786 4128
D013584	Sarcoma, Synovial	3553 7088 26039 6297
D013585	Synovitis	2150 1890 6352 4609 2099 9332 4312 1435
D018805	Sepsis	3569 1906 4210 133 2153 3586 4353 3827 11318 7474 284 3684 6441 6609 7076 7124 796 820 7096 64127 3589 27202 2149 5327 3559 7097 3659 4057 3688 5054 7099 7077 3606 341 3676 9332 201501 4638 1401 2244 2209 285 4318 3627 2152 7422 4313 3329 3383 11093 9423 3557 929 1440 671 7450 2155 1636 155 1524 4153 2147 5971 6648 9173 5788 3458 2150 4282 1991 920 79931 10544 207 5138 5837
D012595	Scleroderma, Systemic	836 100132285 6327 1432 6354 1490 3557 1493 6498 355 9354 3552 7076 5366 841 6497 1636 6347 6403 2200 199 5062 1499 2022 4313 5155 4692 930 26191 4092 9475 5104 3553 6439 3598 2159 102 4088 10456 2153 3806 3803 3565 2147 2033 207 5393 28514 6647 4312 3558 3586 6317 185 5394 286204 7471 57154 4282 857 10438 6614 9043 5055 7077 1906 26762 5328 6362 325 5792 3605 1401 5788 4318 2247 308 671 6556 609…
D013625	Takayasu Arteritis	3106 3674 3690 4314 3105 4313 6403 4318 4276 4524
D013700	Giant Cell Arteritis	3565 2100 3690 100133941 6374
	Testicular dysfunction	642559 3845 1080 1027 4439 7258 449520 9604 920 10942 2944 4170 57554 1956 4436 1234 3815 79444 2100 1636 898 2249 442867 7515 442868 2064 204474 7341 9043 2950 332 673 4158 5940 1485 3479 4292 442918 29122 2597 355 6462 2272 79923 9656 442917 9083 7503 894
D013736	Testicular Neoplasms	2072 79084 10419 7507 2271 9479 2693 2067
D013789	Thalassemia	3630 4524 4582 9518 57492 7259 3479 3569 3576 3119 3688 6708 1118 3811 3676 3934 7166 287
D013919	Thromboangiitis obliterans	929 1435 3383 4314 6401 3673
D013921	Thrombocytopenia	861 11093 355 3674 4352 2215 7454 6352 4153 4627 2623 3690 7456 3589 3576 3569
D013922	Thrombocytosis	3569 135 3439 7173 4352
D019851	Thrombophilia	2147 2153 10544 2266 1401 1636 2158 2152 4524 2160 3717 7124 5054 2157 3684 3689 462 5049
D013924	Thrombophlebitis	7083 1890 58488 1956 4040 4626 664 6667 7298 55856 5077
D013945	Thymoma	4065 2099 26191 2597 326 3593 8875 27 1493 4276
D013964	Thyroid Neoplasms	5933 9768 78986 79921 3640 6013 26471 2674 5027 1965 2597 754 7076 80155 3872 4495 406938 9249 3565 3586 7082 5028 5029 63892 7124 942 6019 1634 2200 11315 5795 3107 6258
D013959	thyroid diseases	3640 4036 3958 6352 596 581 598 3956 3627 5743 3815 7173 578 673 6528 5979 7253 7080 389434
D013966	Thyroiditis	941 3383
D013981	Tic disorders	3329 672
D014076	Tooth diseases	727897 4589 9260
D046110	Hypertension, Pregnancy-Induced	4318 3991 3990 1636 7076 3952 7077 4313 345 183
D015493	Paraparesis, Tropical Spastic	4276 4318 3569 207 176 9869 4277
D014376	Tuberculosis	6556 6590 6347 5970 6348 5806 919 6351 3438 3552 3553 3383 3240 3371 4312 7124 3576 64127 26191 2944 3683 4282 56244 1432 9021 941 3117 4068 596 718 240 5028 1511 3559 2638 186 4159 52 5027 1118 7431 4170 5071 2200 2098 7337 9437 9363 10960 653509 1522 597 2739 3578 58190
D014402	Tuberous sclerosis	4363 6347 7249 5111 7248 3551 5310 57521 6198 6194 7124 5928 3383 6009 3667
D014412	Tumor virus infections	355
D014424	Turner Syndrome	2261 5335 6473
D003093	colitis, ulcerative	2169 929 64127 3605 673 6369 7124 3953 4282 1493 3383 8856 3627 4023 9966 7099 5802 3304 4650 3481 7494 1636 3856 64170 4276 3105 80209 7076 5970 3683 3589 3780 3553 4277 6696 760 3557 4292 4524 4312 3569 7097 6584 4772 4314 890 6340 337 1893 3458 4210 10135 6583 11213 248 7291 9021 10392 10344 8924 343 6338 1604 9 3576 3567 56244 396 79589 219771 1027 330 942 324 6532 4486 8807 3620 4548 5771 63…
D014552	Urinary tract infections	3383 6590
D014564	urogenital abnormalities	627 5314 6462 2260 367 7490 3624 190 1588 6092 3730 26012 445815 3973
D014594	Uterine Neoplasms	3627 378938
D014591	Uterine diseases	378938 4313 1499 2099 412 1588 5016
D007889	Leiomyoma	405 3569 142 7450 216 196 3912 1523
D014605	uveitis	133 64127 28951 2098 1152 355 3458 3605 3305 6017 1524 9021 407 4586 9655 9436
D014607	Uveomeningoencephalitic Syndrome	7299 7306 1638
D014615	Vaccinia	387 3821 7443 1845 581 3458 10018 578 3725 2597 7444
D014648	varicose veins	5023 4256 4318 4314 2944 3625 3306
D015140	Dementia, Vascular	348 5320 183 177 551 1636 728 9446 1471
D014652	vascular diseases	56729 2944 1432 2697 133 3625 551 3306 2678 26191 1524 3484 2215 7295 1634 358 4089 1191 7428 2150 2157 64805 79001 659 7177 11285 5352 4671 64499 2717
D014657	vasculitis	4313 4353 3383 3091 10563 4210 710 177 6280 780 6037
D006525	Hepatitis, Viral, Human	9536 1548
D014766	Viremia	5133 10663 1234 60489 3106 60468
D014777	virus diseases	3106 3458 796 10344 4599 3821 59067 3567 3566 5322 939 5058 4000 64135 3491 5366 3676 6041 3594 57506 1147 103 282618 282616 5868 29110 3838 5932 1616 3665 10219 3837 57062 10010 4001 3609
D014804	Vitamin B deficiency	4522 406906 10560 2643 2110 1033 2108
D014808	Vitamin D deficiency	846 1843 861 2159 4297 5894
D014820	Vitiligo	4644 79083 2944 2952 1906 2099 5045 847 590 5443 207 43 3107 326 6490 260402 4482 60314
D006623	Von Hippel-Lindau syndrome	1191 79960
D014845	Vulvar diseases	3371 1401 5743 836 768
D014898	Werner syndrome	27339 7486 4609 142 9370 5423 4683
D014923	Wiskott-Aldrich syndrome	7456 7454 10097 9564 3558 6387 4690 5747 10096 8936
D015009	Yersinia infectionz	60489 7345 3384 100133171 26609 3481 2052 11200 4276 478 6670 266 3117 728461 815 6667 1050 2033 200316 4261 38 27040 2956 7450 3551 3784 1956 653509 57491 3214 3786 3925 335 196 79068 7433 367 5989 9133 11201 7258 4436 1859 3569 6338 3937 2567 6664 7490 1513 6247 1051 3713 10308 1647 3329 6658 5429 919 28 10365 3684 9056 348 5338 3586 3383 19 2064 28996 56654
D000015	abnormalities, multiple	374654 1302 8626 2657 5190 2138 10083 5077 5824 5828 7050 80144 57514 64093 10743 3481 7399 673 7046 64072 128178 4239 3643 7048 2261 2314 4647 2068 79738 55997 10804 80326 1387 6591 136647 6901 57194 9496 79809 4281 4286 6663 5317 4487 6496 2071 64840 2074 8517 585 582 583 80184 124590 65217 129880 7020 3265 4626 1837 137814 51057 79955 4750 5573 1723 641 55636 4952 7546 7547 8504 9126 117581 38…
D000193	actinomycetales infections	3593 8517 3594 3459 6772 3460 1536
D000291	adnexal diseases	668 79983 5290 10232 23405 5889 5071 1730 207 675 999 672 135935 22800 5892 1499 9210 344018 2332 2492 4978 2516 2064
D000307	adrenal gland diseases	2778 3758 8086 1589 1188 7157 51 6557 6770 190 1584 1585 1187 7809 215 3762 5573 1586 2516 3284
D000419	albuminuria
D000592	amino acid metabolism, inborn errors	593 2639 2731 2653 10165 5095 3141 275 6898 8546 5053 1738 4286 79783 875 4948 5096 3257 1373 28976 26258 84343 51151 3081 5860 388552 10157 3815 7299 5009 445 34 2110 383 2184 7306 11234 594 435 55065 4935 5184 79803 89781 3242 1629 37 36 35 27034 1585 2109 2108 84062 686 5092
D000783	aneurysm	1281 4088 59 7046 4629 4638 7048
D001145	arrhythmias, cardiac	3759 10060 10142 3753 10008 3757 9992 10021 6640 859 23171 287 775 3762 3741 6324 55800 4624 2702 1804 3784 783 4878 51422 6330 6331
D001157	arterial occlusive diseases	4040 23209 8997 84159 59 7015 4205
D001161	arteriosclerosis	4040 23209 8997 84159 7015 4205
D001259	ataxia	5173 56652 747 8622 56997 23345 5521 3736 6908 85300 5582 4287 146057 472 10939 146227 2259 3748 255928 785 10528 3708 773 6712 9640 55129 5428 343641 5080 6507 23064 6310 6311 55775 6314 25814
D020274	autoimmune diseases of the nervous system	4803 5428 1145 3575 4914 5376 2743 8518 1134 2741 9517 547 100133941 1786 5788 65125 10558 51062
D001423	bacterial infections and mycoses	3593 8517 64581 3460 55851 23765 3459 112744 6772 5663 1536 23385 3594 64170
D001480	basal ganglia diseases	55737 7345 23400 3064 23636 6622 11315 5071 1981 540 7054 26058 80025 8398 2629 1861 83943 80704 27429 120892 9627 25793 114798 4137 65018 55145 2512
D001649	bile duct diseases	5244 10165 1723 3930 182 5205 8647 4853
D001660	biliary tract diseases	5244 10165 1723 3930 182 5205 8647 4853
D001778	blood coagulation disorders	3717 11093 8546 3674 7454 7450 5627 79803 5624 90411 3257 2155 2157 26258 84343 2153 2244 1675 2266 2159 388552 2815 2812 3998 462 3075 11234 2158 948 89781 7066 2147 3690 2677 2165 84062 2243 2161 2160 2162
D025861	blood coagulation disorders, inherited	8546 3674 7454 7450 3690 79803 5624 90411 3257 2155 2157 26258 84343 2153 2244 1675 2266 2159 388552 2815 2812 3998 462 3075 23218 11234 948 89781 2158 2147 2165 84062 2243 2161 2160 2162
D001791	blood platelet disorders	3717 11093 629 4179 8546 3674 7454 3690 84930 79803 2812 7056 3257 26258 84343 388552 2815 718 54205 23218 3075 11234 948 89781 7066 3426 84062 81494
D001796	blood protein disorders	959 958 974 973 695 5627 5624 3662 7374 56262 83417 462 7468 4094 595 4598 2261 3543 29760 57379
D001835	body weight	8431 4160 5443 3952 181 7352 5468
D001848	bone diseases, developmental	5176 760 8022 23592 5745 7227 60681 8540 5479 1836 4148 1299 28962 1311 121340 50964 7040 10682 10683 3339 2260 6399 7253 2316 415 1387 4488 2778 1278 169792 8600 1482 6452 8443 7038 4041 1513 2263 64175 64840 9469 2074 8200 9842 2254 4750 6777 2261 50506 9241 9533 79659 2200 8820 9401 2688 405753 7291 10312 6528 7080 59341 1186 860 2697 2693 2692 10491 2690 2737 132884 1161 139285 9451 64327 694…
D001851	bone diseases, metabolic	4758 2778 5251 4041 5167 120227 1184 84572 8074 1277 1594 79158 8675 1758 57192 7421 142680
D001928	brain diseases, metabolic	215 2717 2653 5476 285362 5824 5828 540 348 4864 2998 5264 5261 3242 51 2997 410 411 538 593 594 57192 275 6389 2542 5256 4728 5255 5091 5092 2548 4723 51204 427 443 5009 2760 445 383 4541 4540 4758 2670 3251 4952 435 8504 2592 6834 5660 6609 10020 1738 4538 4535 4537 1373 5236 1585 9409 5860 9131 2584 10157 2581 1352 2629 1355 3073 3074 340024 2184 95 5428 1629 5189 5224 51128 2517 2731 10165 68…
D020739	brain diseases, metabolic, inborn	215 2717 2653 5476 285362 5824 5828 540 348 4864 2998 5264 5261 3242 51 2997 410 411 538 593 594 57192 275 6389 2542 5256 4728 5255 5091 5092 2548 4723 51204 427 443 5009 2760 445 383 4541 4540 4758 2670 3251 4952 435 8504 2592 6834 5660 6609 10020 1738 4538 4535 4537 1373 5236 1585 9409 5860 2584 10157 2581 1352 2629 1355 3073 3074 340024 2184 95 5428 1629 5189 5224 51128 2517 2731 10165 6898 10…
D001941	breast diseases	84952 1588 150094 4683 207 208 672 79728 5892 5290 7517 11200 2192 81847 83990 9833 5889 5888 675
D002239	carbohydrate metabolism, inborn errors	3920 55343 4723 5373 1798 6448 2998 10195 5261 22845 2997 2990 2799 411 56052 3141 6389 2542 9380 4728 9382 5255 5091 2548 4126 4125 51204 9526 4540 4351 4758 51422 8813 29929 79053 2592 6834 178 10559 2203 4537 5236 84342 189 2683 2584 2582 112817 1352 84572 1355 2588 374291 229 2632 7841 138050 5428 57192 3373 5224 2517 91869 79796 4247 91949 5213 2539 85365 5160 5162 2720 10466 79087 5256 4508…
D006332	cardiomegaly	10060 9531 7139 7112 88 5664 131118 6389 7134 7137 11155 5350 4000 7414 1674 1756 2070 7273 8048 6444 4624 4625 70 5663 7168 1829 2218 282996 6331 8557 91624
D009202	cardiomyopathies	6442 3920 4634 10060 9531 4633 7112 88 85366 6901 5664 131118 6389 7134 7137 1832 5318 6262 5350 6261 4000 859 7414 79188 1756 7139 2070 51778 11155 7273 8048 1674 6444 4624 4625 70 4607 1837 5663 7168 1829 125972 1824 2218 4646 282996 51422 6331 57158 3728 8557 91624
D002311	cardiomyopathy, dilated	10060 9531 7139 7112 88 5664 131118 6389 7134 7137 11155 5350 4000 7414 1674 1756 2070 7273 8048 6444 4624 4625 70 5663 7168 1829 2218 282996 6331 8557 91624
D002312	cardiomyopathy, hypertrophic	7139 4634 7134 7137 5350 859 7414 85366 7273 8048 51778 4624 4625 70 4607 4633 7168 125972 4646 51422 57158 8557 91624
D024741	cardiomyopathy, hypertrophic, familial	7139 4634 7134 7137 5350 859 7414 85366 7273 8048 51778 4624 4625 70 4607 4633 7168 125972 51422 57158 91624 8557
D018376	cardiovascular abnormalities	3759 10142 4893 4089 3753 70 54880 6331 3757 859 1482 6901 6899 9992 78987 2200 55172 92579 6262 1837 79188 6640 137814 5894 11235 182 64446 5921 55036 83544 287 5781 775 1832 3762 2626 2022 51314 2657 673 2697 7021 5318 4624 6736 123872 1829 27063 94 339829 4838 7092 27019 221421 3784 23414 1824 345895 6654 1723 51422 7405 8701 3845 57057 55997 6330 23389 3728 83605 4853 1767 7547
D002340	carotid artery diseases	59
D002524	cerebellar ataxia	5173 56652 747 8622 56997 23345 5521 3736 6908 85300 5582 4287 146057 472 10939 146227 2259 3748 255928 785 10528 3708 773 6712 9640 55129 5428 343641 5080 6507 23064 6310 6311 55775 6314 25814
D002780	cholestasis, intrahepatic	5244 10165 1723 3930 182 5205 8647 4853
D025063	chromosome disorders	3827 6495 2736 6496 6736 9126 2657 147912 64324 57194 6899 4204 7050 5727 2138 4487 2033 10743 137814 3481 7020 4239 8243 7337 6469 2332 2334 2314 1028 8481 25836 55997 1387 7546 50937
D003092	colitis
D003095	collagen diseases	5176 60681 5479 4920 5352 5351 871 64175 11285 1294 1278 9509 121340 113189 1277 4627 1290 4041 1285 1287 1286 1281 1289 10491
D003108	colonic diseases	2778 862 5395 4088 4089 5290 79695 4763 5606 1908 1910 4072 4512 657 324 4595 8929 4092 207 673 7486 5157 8313 1499 2956 7048 2042 27030 4522 4292 5979 4436 2668
D015179	colorectal neoplasms	2778 27030 5395 4088 4089 5290 79695 4763 5606 4072 4512 657 324 4595 4092 207 673 7486 5157 8313 1499 2956 7048 2042 862 4522 4292 5979 4436
D018981	congenital disorders of glycosylation	91869 79796 4247 56052 55343 10559 9382 5373 84342 85365 2683 1798 9526 79087 10466 91949 7841 4351 10195 440138 22845 8813 29929 25839 79053
D009358	congenital, hereditary, and neonatal diseases and abnormalities	374654 3920 593 10564 116519 55343 27286 4023 54840 10516 4306 285362 2652 7306 5824 4000 64446 5828 145226 668 26503 3257 344 3857 3854 23171 3852 3853 54507 3998 8905 919 348 3858 51062 1798 142680 255928 79053 710 7045 146227 7046 114798 7040 1497 6094 6794 10195 5261 6658 2316 2314 6654 2312 5307 2294 1258 55997 10804 2074 5913 6591 81839 594 1080 120227 1121 56052 190 28976 11136 3679 275 46…
D003324	coronary artery disease	84159 7015 4040 8997 4205
D003327	coronary disease	4040 948 8997 84159 7015 4205
D003389	cranial nerve diseases	56652 668 50484 1123 57094 4519 4538 4539 6261 80207 4535 4536 4514 57167 9150 55605 493856 4771 4541 4540 11232 4508 5428 4935 5080 64221 4137 90167 4512 84233 4976 7466 291
D019465	craniofacial abnormalities	2736 6496 1302 4088 9533 6949 6452 6899 5728 7050 5727 4893 9401 2033 5781 2263 2260 51082 7291 50945 2657 673 7046 3265 10683 8241 3643 7048 23314 137814 6469 3481 860 6654 8481 4487 3845 55997 2697 5894 1387 4488 7546 50937
D003424	crohn disease	64127
D003643	death	3764 7259 54738 859 23171 11216 6331
D003643	death, sudden	3764 7259 54738 859 23171 11216 6331
D016757	death, sudden, cardiac	11216
D003704	dementia	54664 23209 5664 5663 3064 5071 6622 7305 4535 4536 5621 348 54209 9445 2629 23435 5654 9627 55103 25978 2896 4137 351 4854 4973
D020278	demyelinating autoimmune diseases, cns	3575 100133941 5788 5428
D003922	diabetes mellitus, type 1	1234 493856 346171 55315 64135 7466 10019 1493 3559 3630 6927 3172 5078
D003924	diabetes mellitus, type 2	6833 9479 3636 23101 3630 8462 4760 5078 11132 5506 6927 3651 4535 6517 57104 3667 5167 9370 6934 3172 3643 640 6928
D004067	digestive system neoplasms	2778 6391 5395 1316 4088 4089 11178 5290 79695 4763 5606 3659 6927 4072 4512 862 79728 5979 657 843 324 4595 1033 6049 51201 4092 207 3815 675 999 672 673 7486 5157 8312 8313 1499 2956 5156 4233 7048 2042 2272 6392 6390 27030 4522 4293 4292 7157 9940 4436 3845 57509 23022 2064 51741
D012734	disorders of sex development	4214 190 3295 3730 1589 6662 7490 1586 1584 50846 84733 367 2260 3293 284654 3284 60675 6736 6716 269 268 2492 6770 55636 128674 2516 2253
D049914	dna repair-deficiency disorders	4261 5896 5395 8625 472 6891 6890 4436 4072 2189 1161 2068 79840 7157 79728 9401 2176 2177 2175 2073 2072 2178 2074 64421 204 2071 55215 5994 7486 2187 5993 5897 2956 7048 10111 5429 4683 1643 11200 55120 1029 4292 641 7507 7508 3981
D004392	dwarfism	1161 169792 1482 7253 7038 2200 389434 8820 4591 2688 2260 2261 7474 405753 2074 3481 8200 81794 8022 6528 7080 1280 59341 6777 50506 2693 2692 2690
D020820	dyskinesias	5173 56652 6513 747 3778 8622 56997 23345 5521 3064 3736 6872 6908 85300 5582 4287 1813 146057 472 6310 255928 10939 146227 2259 3748 785 2643 10528 1861 8575 3708 773 23230 6712 9640 7080 55129 5428 343641 5080 6507 23064 8910 6311 55775 6314 25814 25953 478 55145 112476
D004413	dysostoses	2737 9241 9533 64327 6949 3239 9401 2033 51082 2263 2260 64840 7291 8200 392255 10683 2254 5447 8481 2697 1387 4488
D020920	dyssomnias	8864 15 114781 2562 5621 3060 2668 1453 627 4211 8929 4340
D005094	exophthalmos	1493 115352 7253
D015785	eye diseases, hereditary	1302 668 762 2652 1261 6121 10210 8546 24 79147 7306 4901 3257 10585 3850 4867 3859 5148 5146 3769 5145 7399 5995 1292 64072 343035 8842 6010 84140 6017 89781 4647 1406 84233 10594 4976 5158 24148 9094 1121 1123 3679 83959 493856 4286 346007 80207 79803 1634 22999 8754 26258 29914 5961 7439 1258 1259 3815 80184 124590 65217 4117 6935 4541 4540 23418 64218 130557 79955 5080 83394 2979 167691 3614 …
D052776	female urogenital diseases	5310 4306 668 50617 760 79983 6557 6559 7225 5071 5076 8542 3557 268 6648 5824 5828 7056 8671 4868 23512 23607 3939 142680 718 7809 675 999 672 135935 84733 6716 1499 269 6092 4233 116093 6569 4643 2492 23405 4978 2064 988 120227 65266 190 7030 11136 81 6519 5251 9380 79663 6662 5311 51196 6514 5314 525 4968 11281 367 2260 2261 4214 64423 3265 4627 2271 6421 1729 2253 6770 4292 55636 7422 7421 49…
D005261	female urogenital diseases and pregnancy complications	5310 4306 668 50617 760 79983 6557 6559 7225 3040 5071 5076 8542 3557 2321 268 6648 5824 5828 7056 8671 4868 23512 23607 3939 142680 718 7809 675 999 672 135935 84733 6716 1499 269 6092 4233 116093 6569 3039 2990 4643 2492 23405 4978 2064 988 120227 65266 190 7030 11136 81 6519 5251 9380 79663 6662 5311 51196 6514 5314 525 4968 11281 367 2260 2261 4214 64423 3265 4627 2271 6421 1729 2253 6770 429…
D005767	gastrointestinal diseases	2778 1493 6391 345611 5395 1316 4088 4089 11178 5290 79695 115908 4763 5606 4650 1908 1910 4613 4072 1890 3663 51008 4512 6392 3587 55054 5979 2668 657 843 324 4595 6657 6049 8929 4092 207 3815 3588 999 862 673 5243 10019 7486 5157 8313 4436 1499 2956 5156 4233 7048 6794 2042 149233 2316 6390 27030 4522 4293 4292 7157 9940 64127 3845 4481 2064 51741 3659
D040181	genetic diseases, x-linked	3920 55505 2717 9203 2719 27286 215 7454 1837 3251 7592 26277 4983 546 8905 2245 2158 2010 142680 5063 6448 3561 7319 6658 6567 51 412 538 6855 120227 1121 6901 2892 4204 3476 4281 3028 55135 51114 2664 6197 919 367 64840 8517 5009 57477 4625 8450 254065 23096 1641 2273 51422 1536 57502 7421 4952 9968 54820 2290 6535 641339 7015 116442 347344 1736 186 653361 7552 10159 23133 65109 6611 8573 7846 …
D005831	genital diseases, female	668 23512 79983 5290 10232 4437 4436 5889 5071 2956 5728 1730 221895 2261 207 675 999 672 135935 22800 5892 1499 9210 344018 2332 2492 4292 23405 4978 2516 2064
D005832	genital diseases, male	122042 57135 60528 11200 23405 6928 23301 4477 5728 1617 117155 3973 6041 367 8653 4601 1316 8287 3640 117144 161497 2048 4481 57054 57055
D005833	genital neoplasms, female	23512 5290 10232 4437 4436 5889 5071 5728 221895 2261 207 675 999 672 22800 5892 1499 2956 4292 23405 4978 2064
D005834	genital neoplasms, male	1316 5728 60528 2048 11200 3973 6041 6928 4481 23301 367 23405 4477 4601
D044882	glucose metabolism disorders	6833 9479 3636 23101 3630 8462 4760 5078 11132 5506 6927 3651 493856 4535 3559 6517 57104 55315 1234 3667 346171 5167 9370 64135 10019 1493 6524 6934 3172 3643 256297 640 7466 6928
D006042	goiter	5172 1493 115352 7253
D006058	gonadal disorders	128674 122042 668 79983 190 5290 10232 23405 3295 5889 5071 269 3293 268 1589 6662 1730 7490 1586 55636 1584 50846 26012 84733 367 2260 3730 3973 284654 207 675 999 84634 135935 22800 5892 60675 6736 6716 1499 9210 3284 672 3640 344018 2332 2253 4214 2492 6770 2798 4978 2516 2064
D016908	gram-positive bacterial infections	3593 8517 3594 3459 6772 3460 1536
D006201	hair diseases	9119 1041 3889 147409 10161 3892 121391 55806 200879 3887 147495 538
D006323	heart arrest	11216
D006330	heart defects, congenital	3759 10142 4893 3753 70 54880 3757 859 1482 6901 6899 9992 78987 2200 55172 92579 6262 1837 79188 6640 137814 5894 182 64446 5781 55036 83544 287 6331 775 1832 3762 2626 2657 673 2697 7021 5318 4624 6736 123872 1829 6330 339829 4838 7092 27019 221421 3784 23414 1824 345895 6654 1723 51422 7405 8701 3845 57057 55997 23389 3728 51314 4853 1767 7547
D006402	hematologic diseases	3717 212 6125 3040 3043 8546 25 7454 5277 146059 7450 695 5627 5624 7056 23092 11116 2155 4869 546 10661 3998 2244 26258 2158 2159 2243 7390 718 54205 3930 8029 2178 6710 171023 10483 3039 2990 11285 92521 81704 2147 89781 3845 80324 2038 55752 7468 5159 595 4893 4891 4179 3092 6708 3273 9659 2821 3674 7015 26127 1719 79728 10600 2176 2177 368 2175 2260 2261 2266 3662 1130 50943 973 23218 81693 2…
D006425	hemic and lymphatic diseases	4303 4302 3717 4300 212 23048 1536 2657 10215 5079 8301 28992 3040 3043 8546 25 7454 5277 146059 7450 695 5627 5624 7056 23092 26503 11116 2155 84159 2120 546 10661 3998 2244 26258 348 2159 4864 2243 1991 7390 718 348801 54205 3930 1675 8028 8029 3131 285527 2178 6710 10962 171023 6125 10483 3039 2990 2266 79803 92521 29760 2147 89781 3845 55997 80324 2038 56244 55752 7468 5159 595 6988 4893 1002…
D020141	hemostatic disorders	595 4089 889 5351 4094 94 368 1290 2261 11285 1278 9509 3662 113189 1277 11235 1281 83417 1289 7468 2022 83605
D015417	hereditary sensory and motor neuropathy	2617 5191 22948 1785 65055 5631 59341 26353 23095 8139 123606 54332 3329 3735 121512 8988 5354 3236 3798 80208 4000 3315 5376 4747 1778 7879 118813 9896 9897 81846 547 57165 9420 51324 6683 3897 6687 79628 2705 23503 23111 4359 9197 10397 1959 7840 26580 9907 5264 57716 16 8898 8565 9516 81857 79152 51062 10908 9927
D020271	heredodegenerative disorders, nervous system	5173 215 9203 10397 1785 8622 7957 27286 4514 123606 3329 121512 8988 5582 3798 3251 146057 1778 5621 4983 546 547 8905 2245 80025 51062 5063 255928 2705 10528 4803 83943 1786 56997 1959 64374 6448 9907 7443 5264 7319 6658 54840 343641 6567 11141 51 6310 9570 84233 6314 25814 5521 4976 80331 538 6855 4000 8139 54332 55775 7879 4204 6908 3476 493856 4287 8565 80208 80207 7249 7248 51114 2664 2395 …
D006967	hypersensitivity	3596 94103 2302 2312 30009 80332 4589 7941 710 2161 57628
D006969	hypersensitivity, immediate	3596 94103 2302 2312 30009 80332 4589 7941 710 2161 57628
D017496	hypopigmentation	4286 4935 388552 3815 89781 7299 79803 4948 3257 26258 84343 51151 84062 8546 11234 22861 7306
D007027	hypothalamic diseases	2778 374654 2737 79809 27241 123016 8195 5626 22954 80184 8820 2688 585 582 583 55212 9049 8022 166379 51057 6658 84100 79738 91147 129880 2692 54903
D007039	hypotrichosis	9119 1041 147409 10161 55806 200879 147495 121391
D007154	immune system diseases	4303 4302 4300 23048 1145 8625 4609 1786 55343 10215 5078 5079 8301 28992 3040 7454 115761 694 695 5376 3559 3558 83737 84159 4869 547 930 51062 2719 7390 348801 673 5994 8028 11277 23569 5993 285527 65125 10962 3561 3039 7253 2990 4277 100293534 3569 2312 29760 29851 83706 2060 55024 1380 5159 6583 595 6988 100272147 147409 3309 399 4689 10125 2309 4281 3663 3575 2302 7249 89795 80184 919 89884 …
D007160	immunoproliferative disorders	4303 4302 4300 23048 10215 5079 8301 28992 115761 694 3558 84159 4869 348801 673 8028 3131 285527 10962 2060 5159 595 6988 100272147 399 2309 7249 89795 89884 2261 1656 9258 3662 80184 843 4298 841 83417 4297 5087 200942 29844 154215 331 57569 6929 8115 4066 4068 596 27086 79184 50515 27125 6886 6887 4609 4299 2213 3195 4683 861 254065 605 604 10006 6491 10272 602 8178 608 238 5450 4928 4004 4005…
D007232	infant, newborn, diseases	4261 5896 1080 8625 242 2294 6891 6890 6535 59344 4653 204 1545 79840 7051 643418 6439 6326 9401 919 2261 6440 3858 2719 64421 4281 126410 8322 54658 50943 1277 5994 26154 5993 5897 224 1280 653509 7080 3561 3786 4935 11005 3785 50964 90167 3988 1244 412 28956 3849 3848 3981
D015212	inflammatory bowel diseases	345611 149233 3663 3587 3588 55054 5243 64127
D007333	insulin resistance	3630
D007414	intestinal neoplasms	2778 27030 5395 4088 4089 5290 79695 4763 5606 4072 4512 657 324 4595 4092 207 673 7486 5157 8313 1499 2956 7048 2042 862 4522 4292 5979 4436
D007592	joint diseases	4010 3309 9496 4282 7369 4148 2487 4049 115352 56606 6583 4277 3663 56172 8200 23569 4626 4795 7124 3248 100507436 6775 3569 54829
D015448	leukemia, b-cell	604 115761 10272 694 602 5450 596 57569 472 4609 254065 50515
D015451	leukemia, lymphocytic, chronic, b-cell	115761 10272 694 602 596 57569 472 4609 254065 50515
D007945	leukemia, lymphoid	4303 604 10006 4300 6491 10272 23048 6988 8178 100272147 608 57569 10215 5079 6929 28992 3558 596 8115 2309 472 115761 4066 694 5450 602 4004 4005 4515 27086 84159 79184 25925 89884 50515 27125 4302 2120 348801 4928 6886 6887 8028 3131 4609 285527 4791 4298 4683 5159 4299 10962 861 4297 5087 29844 3195 2060 254065
D007951	leukemia, myeloid	5159 3717 64783 4893 865 4026 4763 7913 8522 124540 9321 23305 26511 25 23092 2521 79142 4928 5371 57591 84936 10600 2078 2033 5781 3815 63976 613 7704 4330 4869 2122 2322 153090 57082 4629 8021 2120 3205 54904 861 862 92521 64324 867 3092 2000 3845 10499 7994 5914 1387 10801 8833
D015470	leukemia, myeloid, acute	5159 3717 64783 4026 64324 7913 8522 9321 23305 26511 2322 2521 79142 4928 5371 57591 84936 2078 2033 3815 63976 7704 4330 4869 2122 153090 57082 4629 8021 2120 3205 54904 861 862 865 2000 3845 10499 7994 5914 1387 10801 8833
D017880	limb deformities, congenital	57539 374654 5728 2737 1280 207 7291 4750 3239 81839 8200 5307 64327 4920 2697 2263 2260 2261 157570 7476 79659
D052439	lipid metabolism disorders	3949 2717 54982 335 1201 1200 1203 5476 256471 4023 6609 10577 338 285362 344 4281 1717 4000 857 255738 3988 80331 10555 51128 27329 1509 348 5538 411 2629 7391 116519 2581 2720 2760 3931 4864 284119 3073 84823 149998 1593 2055 5468 224 26119 4547 26580 5346 19 5660 410 427 3074
D008052	lipid metabolism, inborn errors	3949 2717 54982 335 1201 1200 1203 5476 256471 4023 6901 6609 10577 338 285362 344 4281 1717 857 255738 3988 80331 10555 51128 27329 1509 348 5538 411 2629 7391 116519 2581 2720 2760 3931 4864 284119 3073 3074 149998 1593 2055 224 26119 4547 26580 19 5660 410 427
D008173	lung diseases, obstructive	80332 94103 4589 7941 57628
D008180	lupus erythematosus, systemic	2213 1493 3663 1773 6775 26191 7292 3684 7100 11277 720 5133 721 55024 1380 100293534 10125
D008206	lymphatic diseases	4303 4302 4300 23048 2657 10215 5079 8301 28992 115761 694 695 3558 84159 4869 348 4864 348801 673 8028 3131 285527 10962 55997 2060 56244 5159 595 6988 100272147 399 2309 2303 7249 89795 89884 1656 9258 80184 4066 137814 4299 4298 841 83417 4297 2324 5087 200942 29844 5873 7547 154215 331 57569 6929 6609 8115 974 973 4068 596 27086 79184 50515 27125 3195 6886 6887 5551 4609 843 2213 4838 4683 86…
D020140	lysosomal storage diseases, nervous system	2717 5476 57192 5224 5660 6609 10577 10020 285362 2542 5256 5257 5255 2548 5236 5836 51128 348 427 2998 84572 2581 2720 2760 4864 3073 3074 26503 4758 5261 2629 2997 79158 410 411 2517
D008286	malabsorption syndromes	10019 1493 4650
D052801	male urogenital diseases	5310 4306 57135 50617 760 6557 6559 7225 5076 4477 8542 3557 268 6648 5824 5828 7056 8671 79058 8653 1316 23607 3939 142680 718 7809 84733 6716 117144 269 6092 4233 116093 3640 6569 4643 2492 128674 4481 2253 988 120227 65266 190 7030 11136 23301 81 6519 5251 9380 79663 6662 117155 51196 6514 5314 525 4968 11281 367 2260 2261 4214 64423 8287 3265 4627 2271 6421 1729 161497 6770 2048 55636 7422 57…
D054220	malformations of cortical development	5048 5649 3679 5728 79147 9289 79840 347733 7249 7248 2018 1292 1293 170302 10564 7846 9215 1291 1641 2316 2218 57190 54820
D038901	mental retardation, x-linked	6855 3920 215 9459 9203 3373 5048 5631 27286 6535 2245 641339 51422 10479 4204 3476 1641 24140 3028 10084 3251 7592 5456 51114 4983 546 8905 186 65109 7552 8573 170302 5160 5162 57477 10075 5063 2664 10159 23133 2182 6611 347344 8450 8242 2334 7846 84061 6448 23096 138050 2332 7319 6658 3423 158866 6567 11141 51 7102 3425 2892 57502 6197 26260 116442 2290 254065 9968 1741 54820 538
D008659	metabolic diseases	3920 1200 55343 4023 285362 7306 5824 5828 3559 3257 344 80331 348 1798 142680 1493 1497 5468 7048 4935 10195 5261 84233 291 593 594 120227 140803 56052 11136 275 4072 6389 2542 493856 80207 2548 79728 3651 525 26258 2263 1234 64421 443 5009 2760 445 6934 4351 25978 37 36 35 34 23064 640 57505 3251 4952 435 338 335 8462 64221 3291 10020 51021 255738 857 7415 2683 346171 116519 112817 55277 84823 …
D008661	metabolism, inborn errors	3920 57817 212 2717 210 2653 22845 760 3077 116519 55343 5476 7391 215 1355 4023 3373 4125 8546 8540 79158 285362 3284 7306 5824 7841 5373 3257 344 1340 540 26580 5009 348 6329 2243 493753 1798 3939 142680 7369 65125 3931 6901 5096 2632 10195 1497 10555 1738 6448 5428 2998 6337 5264 6569 5261 2990 3242 51 2997 89781 2799 410 411 412 10128 1184 80331 538 2778 3949 593 594 120227 1589 65266 56052 2…
D008664	metal metabolism, inborn errors	2778 57817 5167 5251 8675 1594 120227 779 1184 3077 148738 8074 30061 540 6329 7036 1758 7421 249 142680 538
D016472	motor neuron disease	2617 57679 2733 57449 113278 59341 6606 6607 2521 1639 6647 203228 4744 9896 7415 367 283 29978 3508 10133 55277 23435 9217 26580 7443 23064 6311 54822 538
D009059	mouth diseases	50945 1075 6654 4487 23314
D020966	muscular disorders, atrophic	23345 9499 8557 5213 5339 10020 79147 4000 859 22954 9782 10585 23224 1292 1756 1291 2010 7555 8106 7273 29954 55624 6444 6445 6442 6443 1293 8291 2273 2318 4154 2218 203859 825 1760 4625
D009139	musculoskeletal abnormalities	374654 2736 2737 79659 1302 9241 9533 81839 64327 6949 6452 6899 5728 4920 3481 4488 6662 7050 3239 5727 4088 9401 2033 5781 2263 2260 2261 7476 51082 57539 7291 4313 207 50945 2657 8200 673 7046 3265 4626 392255 10683 8241 3643 7048 23314 6496 137814 6469 2254 1280 4750 860 4893 6654 5447 5307 8481 4487 3845 55997 2697 5894 1387 4853 157570 7546 50937
D009140	musculoskeletal diseases	374654 5176 1302 50484 760 4703 2657 1785 7138 8022 23592 5745 7227 6528 5213 22954 60681 8540 5479 7058 79147 1836 4148 2487 7050 1073 7048 4982 10585 3977 28962 2010 6329 8481 142680 1311 121340 3481 55624 6444 7046 23569 7040 1293 10682 10683 3339 3643 64175 5428 6445 2261 58 2318 7253 2316 8878 6654 5307 415 203859 3845 55997 825 1387 4488 291 2778 57539 81839 3569 169792 4893 8600 1482 6452 …
D009164	mycobacterium infections	3593 8517 3594 3459 6772 3460 1536
D009203	myocardial infarction	23022 241 7804 4973
D017202	myocardial ischemia	7015 4040 7804 948 8997 84159 241 23022 4205 4973
D009370	neoplasms by histologic type	4303 4302 3717 64783 23048 596 23512 4609 4005 4026 3417 5079 7249 8301 28992 10342 221895 8013 5077 25 115761 2521 694 2324 1029 79142 3791 5987 3558 7517 84159 4869 84936 5890 11146 3977 25925 675 348801 4330 3932 6098 8028 3131 51684 5468 8021 4233 116093 10962 10215 6794 51592 6793 6392 2317 6390 6391 92521 2313 4841 3845 2060 5914 1387 2064 10801 2778 8031 8030 6988 4893 100272147 5155 6757 …
D009371	neoplasms by site	374654 8626 3659 5071 4221 4477 150094 9833 7517 1316 83990 675 999 672 673 1956 1499 4233 7048 116093 6794 4437 23405 3845 4481 51079 2064 2778 27030 595 5395 5157 7030 11200 5606 23301 4072 79728 4968 11281 367 2261 51201 5002 79663 3265 4626 972 2271 6421 2272 5573 79695 2048 4292 5979 79058 57509 51741 7428 4978 60528 79577 2192 4436 6928 6927 27241 6288 6289 7157 7490 5546 657 6041 843 1033 …
D018204	neoplasms, connective and soft tissue	5573 23512 5155 6757 4026 11200 1649 727837 6760 8013 5077 2308 2521 8091 2131 7490 7249 221895 5925 2078 324 2115 5002 79058 3815 466 54738 1277 5890 4626 2132 5156 7030 2130 6392 2317 6390 6391 6756 2313 8648 1385 5081
D009372	neoplasms, connective tissue	5573 23512 5155 6757 11200 727837 6760 8013 2521 2130 2131 221895 5925 2078 324 2115 3815 466 54738 1277 4626 2132 5156 6392 2317 6390 6391 6756 2313 1385
D009375	neoplasms, glandular and epithelial	2778 8031 8030 5324 54556 4089 55717 5290 5727 7030 3417 238 1499 3977 10342 6927 201163 657 23085 79145 57670 8805 7157 23095 7490 5546 5987 5925 84925 116093 324 4595 1033 1755 51592 51201 9950 8929 162967 79663 3621 675 55193 4968 5728 57120 673 8314 6098 5108 3265 51684 8312 4771 5468 4233 8795 11236 7175 4841 2271 6421 6392 4914 9049 4292 473 5979 9516 79058 8915 57509 2064 8643 7428
D009380	neoplasms, nerve tissue	6598 55717 3417 4763 238 5468 6389 57670 473 7517 5925 1019 324 1755 8929 162967 675 5728 57120 673 6098 51684 4771 1499 23095 4157 6392 6390 6391 1029 54949 5979 55654 2064 8643 7428
D018302	neoplasms, neuroepithelial	57670 473 162967 6098 675 2064 3417 55717 5728 57120 673 5925 238 51684 324 1499 5468 1755 23095 8643 8929
D009386	neoplastic syndromes, hereditary	5395 4089 11200 4763 4436 5889 4292 4221 27241 5728 2132 2131 7157 7490 5727 7249 7248 657 324 4595 11281 57531 675 1027 672 5892 4072 4771 2956 7048 6794 1029 201163 5979
D009421	nervous system malformations	374654 83605 10397 1785 1786 123606 3329 121512 8988 79147 9289 3798 347733 7050 5376 1778 11235 547 51062 2705 1293 1959 65125 9907 5264 2316 4488 81839 2218 3679 8139 54332 9990 4552 8320 3476 4803 8565 80208 7249 7248 8518 4548 144165 4359 23095 1641 8898 10908 54820 2617 2018 65055 10558 3315 4747 55640 8820 6683 3897 6687 10564 7846 7840 16 4524 4522 57190 81857 2736 6496 5631 5649 59341 263…
D019954	neurobehavioral manifestations	3920 215 9203 84623 51473 27286 3251 161582 7592 8492 4983 546 547 8905 2245 5063 6448 7319 6658 6567 9901 51 55998 1387 84239 3827 2902 2904 9856 4204 1859 3476 3028 3479 51114 2664 1013 9524 57477 84295 8450 254065 23096 8831 51185 51422 57502 538 9968 6855 9126 2290 6535 641339 116442 2055 347344 186 65109 7552 10159 23133 2182 6611 8573 6487 138050 2898 11141 3373 2892 7991 6197 9439 84061 15…
D017599	neuroectodermal tumors	6598 55717 3417 238 5468 6389 57670 473 7517 5925 1019 324 1755 8929 162967 675 5728 57120 673 6098 51684 4771 1499 23095 4157 6392 6390 6391 1029 54949 5979 55654 2064 8643 7428
D009461	neurologic manifestations	5173 3920 215 1302 50484 2652 84623 8622 51473 27286 6872 85300 5582 9203 3251 161582 7592 8492 4983 546 547 8905 2245 1261 54714 5063 255928 5146 5428 7399 10528 2780 7401 6712 6448 7080 7319 6658 343641 6567 9901 51 4647 4137 6310 6311 6314 25814 25953 1387 538 3827 2902 2904 140803 3778 9856 4204 6908 1859 3476 493856 4287 6261 6663 6513 3479 51114 2664 146227 1013 2643 2259 3748 9524 57477 12…
D009468	neuromuscular diseases	1140 1144 1145 50484 10397 57449 1785 1786 285489 3329 121512 8988 2741 79147 2521 3798 6647 1778 4703 10585 547 283 29978 2010 6329 51062 2705 65125 55624 6444 6445 6442 6443 9420 1959 203228 9907 7443 5264 58 2318 16 203859 825 10801 5913 538 123606 6598 113278 9499 274 8139 54332 7879 4803 8565 6261 9782 6311 10558 367 10133 779 8518 1134 4620 4359 4541 4540 3315 3508 7273 7276 2273 8898 23064…
D018326	nevi and melanomas	3868 4157 1029 7517 1019 2261
D009748	nutrition disorders	8431 5251 142680 7274 4160 5443 3952 1184 5167 8074 1594 181 7352 7421 1758 5468 120227 53630
D009750	nutritional and metabolic diseases	3920 1200 55343 4023 285362 7306 5824 5828 3559 3257 344 80331 348 1798 142680 1493 1497 5468 7048 4935 10195 5261 84233 291 593 594 120227 140803 56052 11136 275 4072 6389 2542 493856 80207 2548 79728 3651 525 26258 2263 1234 64421 443 5009 2760 445 6934 4351 25978 37 36 35 34 23064 640 57505 3251 4952 435 338 335 8462 64221 3291 10020 51021 255738 857 7415 2683 346171 116519 112817 55277 84823 …
D015835	ocular motility disorders	56652 4935 6261 50484 1123 57094 4137 90167 55605 64221 57167 5428 668 11232 291
D009916	orbital diseases	1493 115352 7253
D010009	osteochondrodysplasias	2778 57539 132884 5176 8600 9451 59341 23592 6452 5745 7227 8443 79659 60681 8540 5479 8792 1836 4148 2131 5191 871 1186 1298 1299 3977 4750 64175 2261 9469 760 1278 1311 121340 10312 1277 9842 7040 10682 2132 3339 50964 28962 4041 5352 2121 6399 1280 2316 860 139285 1297 415 1513 4488 10491
D010038	otorhinolaryngologic diseases	3596 1302 83544 55172 493856 6663 2302 10083 5784 64446 84059 55036 123872 25861 7399 124590 65217 64072 4771 80975 339829 27019 221421 79955 1729 345895 4647 7466 8701 7401 1767 51314
D050177	overweight	8431 4160 5443 3952 181 7352 5468
D015864	panuveitis
D020734	parkinsonian disorders	8398 1981 9627 55737 2629 7054 26058 7345 23400 65018 27429 120892 5071 6622 11315 25793
D010335	pathologic processes	3759 2778 10060 10142 558 11093 3753 60529 3757 4878 4208 9992 10021 5728 6261 6662 6640 859 3856 657 23171 287 6331 775 256076 3762 3764 6468 5167 779 3875 54738 3741 1804 4624 2702 1285 5265 1286 1280 3784 79813 7259 54658 6330 644 11216
D020763	pathological conditions, anatomical	9119 3476 170302 8320 23414 2660 9990 4613 80781 4488 3897
D013568	pathological conditions, signs and symptoms	10060 54862 1302 50484 2652 84623 51473 3040 6872 85300 161582 6640 3856 8492 6323 547 1261 287 8431 3762 3764 7390 5146 7399 54738 2702 64072 10653 5468 5428 5265 50674 3039 9901 2990 7401 7259 4137 4647 25953 4488 291 2778 9119 2904 140803 3778 7991 4878 4208 9856 9990 9992 8320 1859 3476 2780 6261 6662 6663 6513 3479 54714 23171 3048 2660 1013 11093 2643 9524 3952 124590 65217 3741 84295 4624 …
D010523	peripheral nervous system diseases	2617 6598 5191 4771 22948 1785 65055 5631 59341 4763 23095 8139 123606 3736 54332 3329 3735 121512 8988 10558 5354 3236 3798 8565 80208 4000 3315 5376 4747 1778 65125 118813 335 9896 9897 81846 547 57165 9420 51324 6683 3897 6687 79628 2705 7879 23503 23111 8518 4803 4359 9197 10397 1786 1959 7840 26580 9907 5264 7276 57716 16 19 4914 8898 26353 10908 6335 9517 9516 81857 79152 51062 10801 9927
D018901	peroxisomal disorders	847 51 5264 8504 5830 5195 5194 5189 5191 5190 5193 5192 215 5828 4598 8443 55670 9409 8540 5824
D010859	pigmentation disorders	2073 8546 4286 11234 79803 4948 3257 26258 5781 84343 2072 2071 2261 388552 8517 3815 7299 4254 673 51151 5894 7306 3643 6794 5429 4935 1643 89781 22861 2068 7507 84062 7508
D054198	precursor cell lymphoblastic leukemia-lymphoma	4303 4302 10006 4300 6491 23048 6988 8178 608 285527 10215 5079 6929 28992 2309 4066 4928 4004 4005 3558 27086 84159 25925 89884 27125 4298 348801 6886 6887 8028 3131 10962 2120 4299 4683 861 4297 5087 29844 3195 2060 5159
D011469	prostatic diseases	1316 5728 60528 2048 11200 6041 6928 4481 23301 367 4477 4601
D057165	proteostasis deficiencies	6647 54664 5663 9180 2521 1639 57679 203228 4744 335 9896 6311 7415 283 29978 2934 2243 10133 4069 9445 55277 567 23435 9217 7276 25978 2896 4137 23064 1471 351 54822
D011686	purine-pyrimidine metabolism, inborn errors	1807 1806 3251 56606 7369
D012002	rectal diseases	2778 4092 862 2042 207 4512 4089 27030 4522 5290 673 4088 4763 7486 5157 8313 1499 5979 79695
D015499	renal tubular transport, inborn errors	3758 4306 120227 65266 8074 11136 6519 5251 1636 183 5167 6514 6559 525 8671 185 65125 760 3939 142680 6340 7809 10312 1758 6521 1594 6557 6524 6569 1188 1729 1187 1184 50617 6337 7421 4952 5972 6338 340024
D012130	respiratory hypersensitivity	3596 94103 2302 30009 80332 4589 7941 57628
D012142	respiratory tract neoplasms	5002 6794 6288 6289 7157 673 9940 1956 54904 10568 2064 972
D012162	retinal degeneration	1302 762 2652 6121 10210 6100 10516 24 4901 6247 5148 5149 5146 5145 7399 5995 64072 6094 6010 84140 6017 4647 1406 169522 10594 346007 2074 5158 9094 6785 6261 22999 1524 54714 5961 7439 1258 1259 8754 124590 65217 4117 23418 64218 130557 114902 79955 83394 83552 1001 3614 9129 93589 83872 3000 55812 79947 7099 388939 84059 25861 375298 728458 3075 25794 5654 84100 6295 26121 92211 7401 387715 7…
D058499	retinal dystrophies	5158 3614 1302 24148 762 9129 57096 93589 23418 6121 10210 55975 768206 84839 10083 145226 55812 24 123016 10002 6261 4901 79947 6103 6102 22999 6094 5146 388939 84059 7287 5961 8842 25861 7439 1258 1259 375298 5148 5149 8754 169522 728458 5145 7399 124590 65217 778 5995 4117 2978 2979 64072 6100 10461 25794 84140 9094 26504 4508 64218 130557 6010 6101 2652 6017 79955 84100 6295 3420 83394 4647 1…
D012678	sensation disorders	1302 2652 1261 493856 10002 6663 10083 54714 84059 25861 5146 728458 611 7399 124590 65217 64072 80975 2780 79955 1729 5956 4647 7401 7466
D012816	signs and symptoms	1302 50484 2652 84623 51473 3040 6872 85300 161582 8492 6323 547 1261 8431 7390 5146 7399 64072 5468 5428 50674 3039 9901 2990 4647 4137 55998 84239 2902 2904 140803 3778 7991 9856 1859 2780 6261 6663 6513 3479 54714 3048 1013 611 9524 3952 124590 65217 84295 4359 25953 79955 1729 8831 51185 644 291 112476 11093 10653 64221 6530 2055 181 84059 25861 26580 728458 2629 1861 8575 7352 11232 80975 64…
D012868	skin abnormalities	55505 132884 2312 8626 1308 3909 3868 59344 57514 5339 3655 1896 7015 1832 2068 26154 5351 3691 55135 7051 5317 643418 1736 26277 9401 7507 3852 3853 368 117581 2073 2072 2071 404672 11285 3861 3858 10913 1278 8517 9509 126410 1294 113189 3872 3914 1277 3849 3918 128178 4626 242 136647 5429 224 1290 4792 2121 1643 64840 1281 11005 5184 7508 1289 5818 55651 5573 412 10804 3848 80326 3854
D017437	skin and connective tissue diseases	55851 55505 212 5176 210 114548 8626 1308 112744 23592 7389 3655 8546 10516 5479 1832 150094 7306 1773 9833 7051 3257 1371 26277 643418 3852 3853 10555 3858 3848 147138 7390 126410 121340 675 2707 2706 3887 672 673 11277 23569 128178 5468 7124 3643 2071 6448 4935 6794 2261 1828 149233 2990 100293534 6654 2312 10758 89781 2799 3845 411 412 10804 55024 80326 1380 5317 538 9119 3569 4893 136647 1474…
D017444	skin diseases, papulosquamous	3593 100507436 149233 4049 10758 7124
D017445	skin diseases, vascular	710 2161 80271
D012893	sleep disorders	8864 15 114781 2562 5621 3060 2668 1453 627 4211 8929 4340
D013122	spinal diseases	7058 100507436 5167 4318 4049 1298 1299 54829 7124 8483
D013132	spinocerebellar degenerations	5173 56652 747 8622 56997 23345 5521 3736 6908 5582 4287 146057 255928 6311 10939 146227 2259 3748 785 10528 3708 773 6712 64374 55129 9640 5428 54840 343641 6507 23064 6310 2395 55775 6314 25814
D025241	spondylarthritis	7124 100507436 4049
D013166	spondylitis	7124 100507436 4049
D009057	stomatognathic diseases	286077 1747 1075 1302 1834 50945 6654 5727 4487 6452 5745 265 10117 9622 8241 9313 23314
D018640	stomatognathic system abnormalities	286077 1747 1302 1834 50945 6654 4487 265 10117 9622 8241 9313 23314
D024801	tauopathies	55103 2629 7305 9627 4535 4536 54209 4137 5663 351 5664 5071 348 4973
D057177	tdp-43 proteinopathies	6647 54664 5663 2521 1639 57679 203228 4744 9896 7415 283 29978 10133 55277 23435 9217 25978 2896 4137 23064 6311 54822
D013899	thoracic neoplasms	5002 6794 6288 6289 7157 5573 673 9940 1956 4626 54904 10568 2064 972
D014555	urination disorders	1285 1286 6524
D014565	urogenital neoplasms	23512 60528 5290 7030 11200 4437 4436 6928 23301 5889 5071 4477 27241 5728 79663 7490 5546 221895 5925 3973 6041 116093 4968 11281 367 2261 4841 4292 1316 207 57531 675 55193 999 672 22800 5892 3265 1499 2956 4233 11236 4601 2271 6421 10232 2048 201163 23405 4978 4481 79058 84925 2064 7428
D014570	urologic diseases	5310 4306 760 6557 6559 7225 5076 8542 3557 6648 5824 5828 7056 4868 23607 3939 142680 718 7809 6092 4233 116093 6569 4643 988 120227 65266 7030 11136 81 6519 5251 9380 79663 5311 51196 6514 5314 525 4968 11281 2261 64423 3265 4627 2271 6421 1729 50617 7422 7421 4952 5972 7428 3758 8504 629 5167 27241 1636 2056 7490 5546 183 185 9409 189 112817 10312 6521 1594 6524 3077 11236 1188 1187 1184 4179 …
D014571	urologic neoplasms	7030 84925 27241 7490 5546 5925 11236 4968 11281 2261 4841 79663 57531 55193 3265 4233 116093 2271 6421 201163 79058 7428
D020924	urological manifestations
D014603	uveal diseases	1121 83959 5080 4016 4942
D014606	uveitis, anterior
D014786	vision disorders	1302 2652 1261 60506 493856 10002 6663 10083 54714 84059 25861 5146 728458 611 7399 124590 65217 778 64072 2780 79955 5956 4647 7401 7466
