# Supplementary material for: Conserved Disease Modules Extracted From Multilayer Heterogeneous Disease and Gene Networks for Understanding Disease Mechanisms and Predicting Disease Treatments
Source: Front Genet. 2019 Jan 18;9:745. doi: 10.3389/fgene.2018.00745 (PMC6346701; doi:10.3389/fgene.2018.00745)
Supplement: Table S2 — Human disease similarity data based on disease symptoms. [file Table_2.XLSX]

## Sheet: Sheet1
MeSH id	D018219	D001177	D018323	D000544	D054221	D008080	D008945	D005706	D019339	D010911	D018630	D004378	D012030	D009207	D001714	D002607	D006471	D012128	D015835	D005146	D016098	D003103	D009123	D004938	D015470	D000308	D010235	D008173	D012141	D012734	D053358	D017682	D004409	D008268	D008382	D009135	D017074	D006529	D005242	D003928	D019082	D020968	D006940	D001024	D018376	D013344	D052556	D006961	D004687
D018219	1	0	0	0	0	0	0	0	0	0	0	0	0	0	0	0	0	0	0	0	0	0	0	0	0	0	0	0	0	0	0	0	0	0	0	0	0	0	0	0	0	0	0	0	0	0	0	0	0
D001177	0	1	0	0	0	0	0	0	0	0	0	0	0	0	0	0.3364	0	0	0	0	0	0	0	0	0.210832	0	0	0	0	0	0	0	0	0	0	0	0	0	0	0	0	0.224234	0	0	0	0	0	0	0
D018323	0	0	1	0	0	0	0	0	0	0	0	0	0	0	0	0	0	0	0	0	0	0	0	0.256051	0	0	0	0	0	0	0	0	0	0	0	0	0	0	0	0	0	0	0	0	0	0	0	0	0
D000544	0	0	0	1	0	0	0	0	0	0	0	0	0	0	0.405962	0	0	0	0.149245	0	0.183344	0	0	0	0	0	0	0	0	0	0	0	0.119516	0	0	0	0	0	0	0	0	0	0	0	0	0.140612	0.183421	0	0
D054221	0	0	0	0	1	0	0	0	0	0	0	0	0	0	0	0	0	0	0	0	0	0	0	0	0	0	0	0	0	0	0	0	0	0	0	0	0	0	0	0	0	0	0	0	0	0	0	0	0
D008080	0	0	0	0	0	1	0	0.200911	0	0	0	0	0	0	0	0	0	0	0	0	0	0	0	0.258996	0.318136	0	0.316001	0.197839	0.382073	0.133413	0	0	0	0	0.164865	0	0	0.301367	0	0	0	0	0	0	0	0	0	0.102836	0
D008945	0	0	0	0	0	0	1	0	0	0	0	0	0	0	0	0	0	0	0	0	0	0	0	0	0	0	0	0	0	0	0	0.145415	0	0	0.311884	0	0	0	0	0	0	0	0	0.731089	0	0	0	0.11803	0
D005706	0	0	0	0	0	0.200911	0	1	0	0	0	0	0	0	0	0	0	0	0	0	0	0	0	0.152761	0.285827	0.105107	0.150628	0	0	0	0	0	0	0	0	0	0	0	0	0	0	0	0	0	0	0	0	0	0
D019339	0	0	0	0	0	0	0	0	1	0	0	0	0	0	0	0	0	0	0	0	0	0	0	0	0.105964	0	0	0	0	0	0	0	0	0	0	0	0	0	0	0	0	0	0	0	0	0	0	0	0
D010911	0	0	0	0	0	0	0	0	0	1	0.1844	0	0.132186	0	0	0	0	0	0.201363	0	0	0	0	0	0.163448	0	0	0	0	0	0	0	0	0.451802	0.214279	0.108844	0	0.107014	0	0	0	0	0	0	0	0	0	0	0
D018630	0	0	0	0	0	0	0	0	0	0.1844	1	0	0.326878	0	0	0	0	0	0	0	0	0.381885	0	0	0	0	0	0	0	0	0	0	0	0.412901	0	0	0	0	0	0	0	0	0	0	0	0	0	0	0
D004378	0	0	0	0	0	0	0	0	0	0	0	1	0	0	0	0	0	0	0	0	0	0	0	0.504508	0.244812	0	0	0	0	0	0	0	0	0	0	0	0	0	0	0	0	0	0	0	0	0	0	0	0
D012030	0	0	0	0	0	0	0	0	0	0.132186	0.326878	0	1	0	0	0	0	0	0	0	0	0.154008	0	0	0	0	0	0	0	0	0	0	0	0.200355	0	0	0	0	0	0	0	0	0	0	0	0	0	0	0
D009207	0	0	0	0	0	0	0	0	0	0	0	0	0	1	0	0	0	0	0	0	0	0	0	0	0	0	0	0	0	0	0	0	0	0	0	0	0	0	0	0	0	0	0	0	0	0	0	0	0
D001714	0	0	0	0.405962	0	0	0	0	0	0	0	0	0	0	1	0	0	0	0.100865	0	0	0.16067	0	0.108289	0.102167	0	0	0	0	0	0	0	0.352999	0.104904	0.166679	0	0	0.108425	0	0	0	0	0	0	0	0.134565	0	0.151668	0
D002607	0	0.3364	0	0	0	0	0	0	0	0	0	0	0	0	0	1	0	0	0	0	0.328197	0	0	0	0	0	0	0	0	0	0	0	0	0	0.158349	0.704395	0	0	0	0	0	0.276928	0	0	0	0	0	0	0
D006471	0	0	0	0	0	0	0	0	0	0	0	0	0	0	0	0	1	0	0	0	0	0	0	0.524177	0.119391	0	0.129032	0	0	0	0	0	0	0	0	0	0	0	0	0	0	0	0	0	0	0	0	0	0
D012128	0	0	0	0	0	0	0	0	0	0	0	0	0	0	0	0	0	1	0	0	0	0	0	0	0.112253	0	0.140897	0.895346	0	0	0	0.193842	0	0	0	0	0	0	0	0	0	0	0	0	0	0	0	0	0
D015835	0	0	0	0.149245	0	0	0	0	0	0.201363	0	0	0	0	0.100865	0	0	0	1	0	0	0.137615	0	0	0.100149	0	0	0	0	0	0	0	0	0	0	0.196603	0	0	0	0	0	0	0	0	0	0	0	0	0
D005146	0	0	0	0	0	0	0	0	0	0	0	0	0	0	0	0	0	0	0	1	0	0	0	0	0.117276	0	0	0	0	0	0	0	0	0	0	0	0	0	0	0	0	0	0	0	0	0	0	0	0
D016098	0	0	0	0.183344	0	0	0	0	0	0	0	0	0	0	0	0.328197	0	0	0	0	1	0	0	0	0	0	0	0	0	0	0	0	0	0	0	0.24089	0	0	0	0	0	0	0	0	0	0	0	0	0
D003103	0	0	0	0	0	0	0	0	0	0	0.381885	0	0.154008	0	0.16067	0	0	0	0.137615	0	0	1	0	0	0	0	0	0	0	0.110063	0	0	0	0.230123	0.574915	0.114229	0	0	0	0	0.64569	0	0	0.195035	0	0	0	0	0
D009123	0	0	0	0	0	0	0	0	0	0	0	0	0	0	0	0	0	0	0	0	0	0	1	0	0	0	0	0	0	0	0	0	0	0	0.146717	0.16818	0	0.143148	0	0	0	0	0	0	0	0	0	0	0
D004938	0	0	0.256051	0	0	0.258996	0	0.152761	0	0	0	0.504508	0	0	0.108289	0	0.524177	0	0	0	0	0	0	1	0.337416	0.106185	0.175557	0.130218	0.1941	0	0	0	0	0	0	0	0.10346	0.274427	0	0	0	0	0	0	0	0	0	0.151035	0
D015470	0	0.210832	0	0	0	0.318136	0	0.285827	0.105964	0.163448	0	0.244812	0	0	0.102167	0	0.119391	0.112253	0.100149	0.117276	0	0	0	0.337416	1	0	0.186415	0.102988	0.289515	0	0	0	0	0	0.168674	0.170644	0.170458	0.576835	0	0	0	0.112592	0.131709	0	0	0.110845	0	0.205042	0
D000308	0	0	0	0	0	0	0	0.105107	0	0	0	0	0	0	0	0	0	0	0	0	0	0	0	0.106185	0	1	0	0	0	0.488937	0	0	0	0	0	0	0	0	0	0	0	0	0	0	0	0	0	0	0
D010235	0	0	0	0	0	0.316001	0	0.150628	0	0	0	0	0	0	0	0	0.129032	0.140897	0	0	0	0	0	0.175557	0.186415	0	1	0.134576	0	0	0	0	0	0	0	0.147462	0	0	0	0	0	0	0	0	0	0	0	0	0
D008173	0	0	0	0	0	0.197839	0	0	0	0	0	0	0	0	0	0	0	0.895346	0	0	0	0	0	0.130218	0.102988	0	0.134576	1	0	0	0	0.188401	0	0	0	0	0	0	0	0	0	0	0.467874	0	0	0	0	0	0
D012141	0	0	0	0	0	0.382073	0	0	0	0	0	0	0	0	0	0	0	0	0	0	0	0	0	0.1941	0.289515	0	0	0	1	0	0	0	0	0	0	0	0	0	0	0	0	0	0	0	0	0	0	0	0
D012734	0	0	0	0	0	0.133413	0	0	0	0	0	0	0	0	0	0	0	0	0	0	0	0.110063	0	0	0	0.488937	0	0	0	1	0	0	0	0	0	0	0	0	0	0	0	0	0	0	0	0	0	0	0
D053358	0	0	0	0	0	0	0	0	0	0	0	0	0	0	0	0	0	0	0	0	0	0	0	0	0	0	0	0	0	0	1	0	0	0	0	0	0	0	0	0	0	0	0	0	0	0	0	0	0
D017682	0	0	0	0	0	0	0.145415	0	0	0	0	0	0	0	0	0	0	0.193842	0	0	0	0	0	0	0	0	0	0.188401	0	0	0	1	0	0	0	0	0	0	0	0	0	0	0	0	0	0	0	0	0
D004409	0	0	0	0.119516	0	0	0	0	0	0	0	0	0	0	0.352999	0	0	0	0	0	0	0	0	0	0	0	0	0	0	0	0	0	1	0	0.120025	0	0	0	0	0	0	0	0	0	0	0	0	0	0
D008268	0	0	0	0	0	0	0	0	0	0.451802	0.412901	0	0.200355	0	0.104904	0	0	0	0	0	0	0.230123	0	0	0	0	0	0	0	0	0	0	0	1	0	0	0	0	0	0	0	0	0	0	0	0.142427	0	0	0
D008382	0	0	0	0	0	0.164865	0.311884	0	0	0.214279	0	0	0	0	0.166679	0.158349	0	0	0	0	0	0.574915	0.146717	0	0.168674	0	0	0	0	0	0	0	0.120025	0	1	0.268865	0	0	0	0	0	0	0	0.366397	0	0	0	0.139141	0
D009135	0	0	0	0	0	0	0	0	0	0.108844	0	0	0	0	0	0.704395	0	0	0.196603	0	0.24089	0.114229	0.16818	0	0.170644	0	0.147462	0	0	0	0	0	0	0	0.268865	1	0	0.180566	0	0	0.155422	0	0	0	0	0	0	0.185302	0
D017074	0	0	0	0	0	0	0	0	0	0	0	0	0	0	0	0	0	0	0	0	0	0	0	0.10346	0.170458	0	0	0	0	0	0	0	0	0	0	0	1	0.156171	0	0	0	0	0	0	0	0	0	0	0
D006529	0	0	0	0	0	0.301367	0	0	0	0.107014	0	0	0	0	0.108425	0	0	0	0	0	0	0	0.143148	0.274427	0.576835	0	0	0	0	0	0	0	0	0	0	0.180566	0.156171	1	0	0	0	0	0	0	0	0	0	0	0
D005242	0	0	0	0	0	0	0	0	0	0	0	0	0	0	0	0	0	0	0	0	0	0	0	0	0	0	0	0	0	0	0	0	0	0	0	0	0	0	1	0	0	0	0	0	0	0	0	0	0
D003928	0	0	0	0	0	0	0	0	0	0	0	0	0	0	0	0	0	0	0	0	0	0	0	0	0	0	0	0	0	0	0	0	0	0	0	0	0	0	0	1	0	0	0	0	0	0	0	0	0
D019082	0	0	0	0	0	0	0	0	0	0	0	0	0	0	0	0	0	0	0	0	0	0.64569	0	0	0	0	0	0	0	0	0	0	0	0	0	0.155422	0	0	0	0	1	0	0	0	0	0	0	0	0
D020968	0	0.224234	0	0	0	0	0	0	0	0	0	0	0	0	0	0.276928	0	0	0	0	0	0	0	0	0.112592	0	0	0	0	0	0	0	0	0	0	0	0	0	0	0	0	1	0	0	0	0	0	0	0
D006940	0	0	0	0	0	0	0	0	0	0	0	0	0	0	0	0	0	0	0	0	0	0	0	0	0.131709	0	0	0.467874	0	0	0	0	0	0	0	0	0	0	0	0	0	0	1	0	0	0	0	0	0
D001024	0	0	0	0	0	0	0.731089	0	0	0	0	0	0	0	0	0	0	0	0	0	0	0.195035	0	0	0	0	0	0	0	0	0	0	0	0	0.366397	0	0	0	0	0	0	0	0	1	0	0	0	0	0
D018376	0	0	0	0	0	0	0	0	0	0	0	0	0	0	0	0	0	0	0	0	0	0	0	0	0	0	0	0	0	0	0	0	0	0	0	0	0	0	0	0	0	0	0	0	1	0	0	0	0
D013344	0	0	0	0.140612	0	0	0	0	0	0	0	0	0	0	0.134565	0	0	0	0	0	0	0	0	0	0.110845	0	0	0	0	0	0	0	0	0.142427	0	0	0	0	0	0	0	0	0	0	0	1	0	0	0
D052556	0	0	0	0.183421	0	0	0	0	0	0	0	0	0	0	0	0	0	0	0	0	0	0	0	0	0	0	0	0	0	0	0	0	0	0	0	0	0	0	0	0	0	0	0	0	0	0	1	0	0
D006961	0	0	0	0	0	0.102836	0.11803	0	0	0	0	0	0	0	0.151668	0	0	0	0	0	0	0	0	0.151035	0.205042	0	0	0	0	0	0	0	0	0	0.139141	0.185302	0	0	0	0	0	0	0	0	0	0	0	1	0
D004687	0	0	0	0	0	0	0	0	0	0	0	0	0	0	0	0	0	0	0	0	0	0	0	0	0	0	0	0	0	0	0	0	0	0	0	0	0	0	0	0	0	0	0	0	0	0	0	0	1
D000303	0	0	0	0	0	0	0	0	0	0	0	0	0	0	0	0	0	0	0	0	0	0	0	0	0	0	0	0	0	0	0	0	0	0	0	0	0	0	0	0	0	0	0	0	0	0	0	0	0
D011164	0	0	0	0	0	0	0	0	0	0	0	0	0	0	0	0	0	0	0	0	0	0	0	0	0	0	0	0	0	0	0	0	0	0	0	0.227972	0	0	0	0	0	0	0	0	0	0	0	0	0
D013746	0	0	0	0	0	0	0	0	0	0	0	0	0	0	0	0	0	0	0	0	0	0	0	0	0	0	0	0	0	0	0	0	0	0	0	0	0	0	0	0	0	0	0	0	0	0	0	0	0
D004485	0	0	0	0	0	0	0	0	0	0	0	0	0	0	0	0	0	0	0	0	0	0	0	0	0	0	0	0	0	0	0	0	0	0	0	0	0	0	0	0	0	0	0	0	0	0	0	0	0
D004613	0	0	0	0	0	0	0	0	0	0	0	0	0	0	0	0	0	0	0	0	0	0	0	0	0	0	0	0	0	0	0	0	0	0	0	0	0	0	0	0	0	0	0	0	0	0	0	0	0
D012170	0	0	0	0	0	0	0	0	0	0	0	0	0	0	0	0	0	0.121381	0	0	0	0.236331	0	0	0	0	0	0	0	0	0	0	0	0.682412	0	0	0	0	0	0	0	0	0	0	0	0	0	0	0
D012871	0.112587	0	0	0	0	0	0	0	0.210401	0	0	0	0	0	0	0	0	0	0	0	0	0	0	0	0.212592	0.163466	0	0	0	0	0	0	0	0	0.124245	0.107134	0	0.237497	0	0	0	0	0.103705	0	0	0	0	0.175705	0
D016569	0	0	0	0	0	0	0	0	0	0	0	0	0	0	0	0	0	0	0	0	0	0	0.165865	0	0	0	0	0	0	0	0	0	0	0	0	0	0	0	0	0	0	0	0	0	0	0	0	0	0
D020258	0	0	0	0.327036	0.513282	0	0	0	0	0.118045	0	0	0	0	0.379324	0	0	0	0.170351	0	0.175123	0	0	0.124212	0.222092	0	0	0	0	0	0	0	0.362847	0	0	0.147458	0	0.171308	0	0	0	0	0.126776	0	0	0.372633	0	0.177247	0
D020190	0	0	0	0	0.393345	0	0	0	0	0	0	0	0	0.385201	0.531626	0	0	0	0	0	0	0	0	0	0	0	0	0	0	0	0	0	0	0	0	0	0	0	0	0	0	0	0	0	0	0	0	0	0
D028361	0	0	0	0	0	0	0	0	0	0	0	0	0	0	0	0.115867	0	0	0	0	0	0	0.12405	0	0	0	0	0	0	0	0	0	0.110077	0	0	0.176151	0	0	0	0	0	0	0	0	0	0	0	0	0
D014571	0	0	0	0	0	0	0	0	0	0	0	0	0	0	0	0	0	0	0	0	0	0	0	0	0	0	0	0	0	0	0	0	0	0	0	0	0	0	0	0	0	0	0	0	0	0	0	0	0
D020529	0	0	0	0.291441	0	0	0	0	0	0	0	0	0	0	0.141619	0	0	0	0	0	0.116914	0	0	0	0.207572	0	0	0	0	0	0	0	0	0	0	0	0	0	0	0	0	0	0	0	0	0	0	0	0
D012594	0	0	0	0	0	0.190224	0	0.148812	0	0	0	0	0	0	0	0.60959	0	0	0	0	0.20566	0	0	0.145669	0.226592	0.138081	0.145788	0	0	0	0	0	0	0	0.244102	0.656821	0	0	0	0.105104	0	0.245991	0	0	0	0	0	0.162487	0
D010198	0	0	0	0	0	0.284162	0	0	0	0	0	0	0	0	0	0	0	0	0	0	0	0	0	0.181861	0.701128	0	0	0	0	0	0	0	0	0	0	0	0	0	0	0	0	0	0	0	0	0	0	0	0
D006976	0	0	0	0	0	0	0	0	0	0	0	0	0	0	0	0	0	0.716471	0	0	0	0	0	0	0	0	0	0.741607	0	0	0	0	0	0	0	0	0	0	0	0	0	0	0	0.104515	0.109079	0	0	0	0
D020191	0	0	0	0	0.233157	0	0	0	0	0	0	0	0	0.408529	0.14517	0	0	0	0	0	0.444188	0	0	0	0	0	0	0	0	0	0	0	0	0	0	0	0	0	0	0	0	0	0	0	0	0	0	0	0
D014339	0	0	0	0	0	0	0	0	0	0	0	0	0	0	0	0	0	0	0	0	0	0	0	0	0	0	0	0	0	0	0	0	0	0	0	0	0	0	0	0	0	0	0	0	0	0	0	0	0
D009436	0	0	0	0	0	0	0	0	0	0	0	0	0	0	0	0	0	0	0	0	0	0	0	0	0.20327	0	0.165569	0	0	0	0	0	0	0	0.163205	0.126549	0	0	0	0	0	0	0	0	0	0	0	0	0
D004941	0	0	0	0	0	0	0	0	0	0	0	0	0	0	0	0	0	0	0	0	0	0	0	0	0	0	0	0	0	0	0	0	0	0	0	0	0	0	0	0	0	0	0	0	0	0	0	0	0
D007669	0	0	0	0	0	0	0	0.272363	0	0	0	0.108982	0	0	0	0	0	0	0	0	0	0	0	0	0	0	0	0	0	0	0	0	0	0	0	0	0	0	0	0.133486	0	0	0	0	0	0	0	0.168788	0
D008546	0	0	0	0	0	0	0	0	0	0	0	0	0	0	0	0	0	0.521459	0	0	0	0	0	0.260303	0.141333	0	0.112177	0.478605	0.100599	0	0	0.157564	0	0	0	0	0	0	0	0	0	0	0.356929	0	0	0	0	0	0
D005173	0	0	0	0	0	0	0	0	0	0	0	0	0	0	0	0	0	0	0	0	0	0	0	0	0	0	0	0	0	0	0	0	0	0	0	0	0	0	0	0	0	0	0	0	0	0	0	0	0
D001264	0	0	0	0	0	0	0	0	0	0	0	0	0	0	0	0	0	0	0	0	0	0	0	0	0	0	0	0	0	0	0	0	0	0	0	0	0	0	0	0	0	0	0	0	0	0	0	0	0
D011605	0	0	0	0.211795	0	0	0	0	0	0	0	0	0	0	0.503184	0	0	0	0	0	0	0	0	0	0	0	0	0	0	0	0	0	0	0.157567	0	0	0	0	0	0	0	0	0	0	0	0	0	0	0
D020300	0	0	0	0.103405	0.241155	0	0	0	0	0	0	0	0	0	0.1383	0	0	0	0	0	0.104545	0	0	0	0.209319	0	0	0	0	0	0	0	0	0	0.160661	0	0	0	0	0	0	0	0	0	0	0	0	0	0
D013276	0	0	0	0	0	0	0	0.145672	0	0	0	0	0	0	0	0	0	0	0	0	0	0	0	0.476482	0.118358	0	0	0	0	0	0	0	0	0	0	0	0	0	0	0	0	0	0	0	0	0	0	0.131394	0
D003744	0	0	0	0	0	0	0	0	0	0	0	0	0	0	0	0	0	0	0	0	0	0	0	0	0.202884	0	0	0	0	0	0	0	0	0	0	0	0	0	0	0	0	0	0	0.132822	0	0	0	0	0
D007019	0	0	0	0	0	0	0	0	0	0	0	0	0	0	0	0	0	0	0	0	0	0	0	0	0.152061	0	0	0	0	0	0	0	0	0	0	0	0	0	0	0	0	0	0	0	0	0	0	0	0
D006501	0	0	0	0.202331	0	0	0	0.561411	0	0	0	0	0	0	0.236157	0	0	0	0	0	0	0	0	0	0.224236	0	0	0	0	0	0	0	0.124794	0	0	0	0	0	0	0	0	0	0	0	0	0	0	0	0
D007417	0	0	0	0	0	0.320801	0	0.355304	0	0	0	0.57135	0	0	0.104809	0.108834	0	0	0	0	0	0.102155	0	0.311596	0.313144	0	0	0	0	0	0	0	0	0	0.188686	0.168294	0	0.258678	0	0	0	0	0	0	0	0	0	0.235243	0
D008171	0	0	0	0	0	0.338682	0	0	0	0	0	0	0	0	0	0	0	0.485759	0	0	0	0	0	0.212217	0.208625	0	0.114461	0.566161	0	0	0	0.14482	0	0	0	0	0	0.199005	0	0	0	0	0.253053	0	0.146058	0	0	0	0
D007873	0	0	0	0	0	0	0	0	0	0	0	0	0	0	0	0	0	0	0	0	0	0.119341	0	0	0	0	0	0	0	0	0	0	0	0	0.209918	0.440382	0	0	0	0	0	0	0	0	0	0	0	0	0
D002925	0	0	0	0	0	0	0	0	0	0	0	0	0	0	0	0	0	0	0	0	0	0	0	0.142785	0	0	0	0.119445	0	0	0	0	0	0	0	0	0.118896	0	0	0	0	0	0	0	0	0	0	0	0
D002973	0	0	0	0	0	0	0	0	0	0	0	0	0	0	0.129999	0	0	0	0	0	0	0.647709	0	0	0	0	0	0	0	0	0	0	0	0	0.461785	0.102399	0	0	0	0	0	0	0	0.158648	0	0	0	0	0
D005058	0	0	0	0	0	0	0	0	0	0	0	0	0	0	0.135155	0	0	0	0	0	0	0	0	0	0	0	0	0	0	0	0	0	0	0	0	0	0	0	0	0	0	0	0	0	0	0	0	0	0
D001237	0	0	0	0	0	0	0	0	0	0	0	0	0	0	0	0	0	0	0	0	0	0	0	0	0	0	0	0	0	0	0	0	0	0	0	0	0	0	0	0	0	0	0	0	0	0	0	0	0
D011014	0	0	0	0	0	0	0	0.130239	0	0	0	0	0	0	0	0	0	0.503291	0	0	0	0	0	0.253733	0.490464	0	0	0.580561	0	0	0	0	0	0	0	0	0.186985	0	0	0	0	0	0	0	0	0	0	0	0
D008052	0	0	0	0	0	0	0	0	0	0.109295	0	0	0	0.167113	0.17795	0.223737	0	0	0.21168	0	0.146503	0	0.587307	0	0.131816	0.106442	0	0	0	0	0	0	0.122957	0	0.682538	0.337221	0	0	0	0	0	0	0	0	0	0	0	0	0
D000787	0	0	0	0	0	0	0.140471	0	0	0	0	0	0	0	0	0	0	0	0	0	0	0	0	0	0	0	0.107319	0	0	0	0	0.637419	0	0	0	0	0	0	0	0	0	0	0	0.613763	0	0	0	0	0
D010146	0	0.121855	0	0	0	0	0	0	0	0	0	0	0	0	0	0	0	0	0	0	0	0	0	0.118702	0	0	0	0	0	0	0	0	0	0	0	0.339105	0	0	0	0	0	0.20622	0	0	0	0	0	0.105346	0.10563
D003969	0	0	0	0	0	0	0	0	0	0	0	0	0	0	0	0	0	0	0	0	0	0	0	0.136342	0.18746	0	0	0	0	0	0	0	0	0	0	0	0.390029	0	0	0	0	0	0	0	0	0	0	0	0
D013575	0	0	0	0	0	0	0	0	0	0	0	0	0	0	0	0	0	0	0	0	0	0	0	0	0	0	0	0	0	0	0	0	0	0	0	0	0	0	0	0	0	0	0	0	0	0	0	0	0
D016399	0	0	0	0.115115	0	0	0	0.260483	0.138331	0.181379	0	0	0	0	0.117379	0	0	0	0	0	0	0	0	0.262207	0.554808	0	0	0	0	0	0	0	0	0.160237	0.103541	0.144351	0.411941	0	0	0	0	0	0	0	0	0	0	0.185416	0
D003704	0	0	0	0.973312	0	0	0	0	0	0	0	0	0	0	0.481948	0	0	0	0	0	0.193849	0	0	0	0	0	0	0	0	0	0	0	0.165507	0	0	0	0	0	0	0	0	0	0	0	0	0.159132	0.210949	0	0
D007235	0	0	0	0	0	0	0	0	0	0	0	0	0	0	0	0	0	0	0	0	0	0	0	0	0	0	0	0	0	0	0	0	0	0	0	0	0	0	0	0	0	0	0	0	0	0	0	0	0
D055952	0	0	0	0	0	0	0	0	0	0	0	0	0	0	0	0	0	0	0	0	0	0	0	0	0	0	0	0	0	0	0	0	0	0	0	0	0	0	0	0	0	0	0	0	0	0	0	0	0
D008104	0	0	0	0	0	0	0	0	0	0	0	0	0	0	0	0	0	0	0	0	0	0	0	0	0	0	0	0	0	0	0	0	0	0	0	0	0	0	0	0	0	0	0	0	0	0	0	0	0
D007022	0	0.110002	0	0	0	0.177265	0.177636	0	0	0.127635	0	0	0	0	0.115019	0	0	0.586595	0	0	0	0	0	0.1771	0.254099	0	0	0.568918	0	0	0	0.323339	0	0	0.126465	0.137348	0	0	0	0	0	0	0	0.402681	0	0	0	0.112674	0
D005909	0	0.131284	0	0.339299	0	0	0	0.105282	0.118008	0.33204	0	0.100699	0	0	0.22359	0.111739	0	0.293482	0.213528	0	0	0.108135	0	0.214345	0.30613	0	0.258816	0.272598	0.111093	0	0	0.123076	0	0.113939	0.160307	0.210803	0	0.138567	0	0	0	0.186928	0.28058	0	0	0.34714	0	0.135571	0
D001480	0	0	0	0.220908	0	0	0	0	0	0	0	0	0	0.168513	0.299761	0	0	0	0	0	0	0	0	0	0	0	0	0	0	0	0	0	0	0	0	0	0	0	0	0	0	0	0	0	0	0	0	0	0
D020925	0	0	0	0.231619	0.329074	0	0	0	0	0	0	0	0	0	0.121599	0	0	0.333607	0	0	0	0	0	0	0.106608	0	0	0.2594	0	0	0	0	0	0	0	0	0	0	0	0	0	0	0	0	0	0	0	0	0
D014883	0	0	0	0	0	0	0	0	0	0	0	0	0	0	0.1951	0	0	0	0	0	0	0	0	0.202656	0.261978	0	0	0	0	0	0	0	0	0	0	0	0	0	0	0	0	0	0	0	0	0	0	0	0
D007818	0	0	0	0	0	0.388787	0	0	0	0	0	0	0	0	0	0	0	0	0	0	0	0	0	0.138894	0	0	0	0	0	0	0	0	0	0	0	0	0	0	0	0	0	0	0	0	0	0	0	0	0
D006689	0	0	0.18931	0	0	0.303922	0	0.365914	0	0	0	0.215113	0	0	0	0.10247	0.170375	0	0	0	0.141094	0	0	0.321438	0.708841	0	0.153231	0	0.260579	0	0	0	0	0	0.156352	0.20974	0.261507	0.620209	0	0	0	0.127001	0.105758	0	0	0	0	0.207137	0
D000172	0	0	0	0	0.151958	0	0	0.159265	0.105796	0	0	0	0	0	0.207929	0.136494	0	0.174676	0	0	0	0.311119	0	0.243076	0.258107	0.453033	0	0.194507	0.106692	0.296515	0	0	0	0.113615	0.465486	0.256543	0	0	0	0.231561	0.324537	0.191354	0	0.170941	0	0	0	0.18885	0
D006949	0	0	0	0	0	0.101147	0	0.203702	0	0.152517	0	0	0	0	0.172754	0	0	0	0	0	0	0	0	0.323322	0.133807	0.345288	0	0	0	0	0	0.126767	0	0	0	0	0	0.35565	0	0.188338	0	0	0	0.128149	0	0	0	0.138355	0
D002181	0	0	0	0	0	0	0	0	0	0	0	0	0	0	0	0	0	0	0	0	0	0	0	0	0	0	0	0	0	0	0	0	0	0	0	0	0	0	0	0	0	0	0	0	0	0	0	0	0
D017436	0	0	0	0	0	0	0	0	0	0	0	0	0	0	0	0	0	0	0	0	0	0	0	0	0	0	0	0	0	0	0	0	0	0	0	0	0	0	0	0	0	0	0	0	0	0	0	0	0
D009080	0	0	0	0	0	0	0.119951	0	0	0	0	0	0	0	0	0	0	0	0	0	0	0	0	0.118876	0.662546	0	0	0	0	0	0	0	0	0	0	0	0	0	0	0	0	0	0	0	0	0	0	0	0
D007945	0	0.14667	0	0	0.23513	0.24834	0	0.203734	0.127977	0.147656	0	0.200329	0	0	0.145541	0	0	0	0	0	0	0.13902	0	0.285224	0.752659	0	0	0.100272	0.212412	0	0	0	0	0	0.284338	0.180983	0.142843	0.464854	0	0	0	0.127299	0.133327	0	0	0	0	0.300495	0.296687
D020803	0	0	0	0.420782	0	0	0	0	0	0	0	0	0	0	0.178707	0	0	0	0	0	0	0	0	0	0.253154	0	0	0	0	0	0	0	0	0	0	0	0	0	0	0	0	0	0	0	0	0	0	0	0
D018335	0	0	0	0	0	0.194779	0	0	0	0.186061	0	0	0	0	0	0	0	0	0	0	0	0	0	0.150068	0.302154	0	0.172886	0	0	0	0	0	0	0	0	0.102363	0	0.212322	0	0	0	0.138483	0.130118	0.14851	0	0	0	0	0
D009232	0	0	0	0	0	0.342452	0.611452	0	0	0	0	0	0	0	0	0	0	0.100112	0	0	0	0	0	0.174079	0.217856	0	0.203389	0.269002	0	0	0.10251	0	0	0	0.231619	0.110239	0	0.223938	0	0	0	0.189842	0.136848	0.598701	0	0	0	0	0
D009396	0	0	0	0	0.312883	0.174076	0	0	0	0	0	0.17109	0	0	0.15786	0	0	0	0	0	0	0.553386	0	0	0.286675	0.112739	0	0	0	0.177523	0	0	0	0	0.548541	0.14942	0	0.231484	0	0.243732	0.716796	0	0	0.224731	0.173795	0	0	0.159759	0
D007405	0	0	0	0	0	0	0	0	0	0	0	0	0	0	0	0	0	0	0	0	0	0	0	0	0	0	0	0	0	0	0	0	0	0	0.188363	0	0	0	0	0	0	0	0	0	0	0	0	0	0
D011561	0	0	0	0	0	0	0	0	0	0	0	0	0	0	0	0	0	0	0	0	0	0	0	0.183483	0.100673	0	0	0	0	0	0	0	0	0	0	0	0	0	0	0	0	0	0	0	0	0	0	0	0
D010437	0	0	0	0	0	0	0	0	0	0	0	0	0	0	0	0	0.130399	0	0	0	0	0	0	0.283943	0	0	0	0	0	0	0	0	0	0	0	0	0	0	0	0	0	0	0	0	0	0	0	0	0
D015535	0	0	0	0	0	0.194502	0	0.108443	0	0	0	0	0	0	0	0	0	0	0	0	0	0	0	0.174109	0.224257	0.157449	0	0	0	0	0	0	0	0	0.151978	0.31555	0.137418	0.167282	0	0	0	0	0	0	0	0	0	0.159411	0
D005693	0	0	0	0	0	0	0	0	0	0	0	0	0	0	0	0	0	0	0	0	0	0	0.144173	0	0.118768	0	0	0	0	0	0	0	0	0	0	0	0	0	0	0	0	0	0	0	0	0	0	0	0
D014901	0	0	0	0	0	0	0	0	0	0	0	0	0	0	0	0.118894	0	0	0	0	0	0	0.629346	0	0.367569	0	0	0	0	0	0	0	0	0	0.132463	0.307368	0	0	0	0	0	0	0	0	0	0	0	0.151669	0
D002493	0	0	0	0.204926	0.49846	0	0	0	0.155583	0.251273	0	0	0	0.200169	0.309676	0.199689	0	0	0	0	0	0	0	0	0.269617	0	0	0	0	0	0	0	0.225036	0.113887	0	0	0	0.194541	0	0	0	0	0	0	0	0	0	0	0
D006099	0	0	0	0	0.17625	0	0	0	0	0.247495	0	0	0	0	0	0	0	0	0	0	0	0	0	0.270259	0.476849	0	0	0	0	0	0	0	0	0.113123	0	0	0.131915	0	0	0	0	0	0	0	0	0	0	0	0
D012851	0	0	0	0	0.255876	0	0	0	0	0	0	0	0	0	0	0	0	0	0	0	0	0	0	0	0.241108	0	0	0	0	0	0	0	0	0.184468	0.219112	0.142679	0	0	0	0	0	0	0	0	0	0	0	0	0
D007153	0	0	0	0	0	0	0	0	0	0	0	0	0	0	0	0	0	0	0	0	0	0	0	0	0.212742	0	0	0	0.130812	0	0	0	0	0	0	0	0.315192	0.288726	0	0	0	0	0	0	0	0	0	0.129046	0
D018358	0	0	0	0	0	0.412992	0	0.2845	0	0	0	0.471816	0	0	0	0	0	0	0	0	0	0	0	0.38545	0.317651	0	0	0.115321	0.337038	0.136516	0	0	0	0	0.120013	0	0	0.191337	0	0	0	0	0	0	0	0	0	0.117558	0
D016135	0	0	0	0	0	0	0	0	0	0	0	0	0	0	0	0	0	0	0	0	0	0	0	0	0	0	0	0	0	0	0	0	0	0	0.134075	0	0	0	0	0	0	0	0	0	0	0	0	0	0
D009062	0	0	0	0	0	0.158107	0	0	0	0	0	0	0	0	0	0	0	0.120262	0	0	0	0	0	0.268825	0.288263	0	0	0.132952	0	0	0	0	0	0	0	0.142779	0	0.122208	0	0	0	0	0.119209	0	0	0	0	0	0
D003638	0	0	0	0	0	0	0	0	0	0	0.237646	0	0	0	0	0	0	0	0	0	0	0.535909	0	0	0	0	0.108791	0	0	0	0	0	0	0	0	0	0	0	0	0	0	0	0	0	0	0	0	0	0.118003
D009264	0	0	0	0	0	0.125684	0	0	0	0	0	0	0	0	0.138646	0.1129	0	0	0	0	0	0.810997	0	0	0	0	0	0	0	0.114783	0	0	0	0	0.626133	0	0	0	0	0	0	0	0	0.218563	0	0	0	0	0
D001919	0	0	0	0	0	0.10249	0.182445	0	0	0	0	0	0	0	0	0	0	0.139171	0	0	0	0	0	0	0	0	0	0.14432	0	0	0	0	0	0	0	0	0	0	0	0	0	0	0	0	0	0	0	0	0
D009362	0	0.220512	0	0	0	0.241382	0	0.283511	0	0.228238	0	0.153533	0	0	0	0	0	0.229749	0	0	0	0	0	0.297271	0.418683	0	0.321232	0.209405	0.149658	0	0	0	0	0	0.157006	0.25079	0	0.262699	0	0	0	0.226475	0.223181	0	0	0	0	0.166245	0
D014071	0	0	0	0	0.334387	0	0	0	0	0	0	0	0	0	0.155722	0	0	0	0	0	0	0.826382	0.103381	0	0	0	0	0	0	0.12128	0	0	0	0	0.616144	0.118509	0	0	0	0	0	0	0	0.211806	0.118114	0	0	0.101912	0
D058627	0	0	0	0	0	0	0	0	0	0	0	0	0	0	0.224541	0	0	0	0	0	0	0	0	0	0	0	0	0	0	0	0	0	0	0	0.594751	0	0	0	0	0	0.774866	0	0	0.222104	0	0	0	0	0
D012804	0	0	0	0	0	0.104682	0.212011	0	0	0	0	0	0	0	0	0	0	0	0	0	0	0	0	0	0	0	0	0	0	0	0	0	0	0	0	0	0	0	0	0	0	0	0	0	0	0	0	0	0
D002583	0	0	0	0	0	0.251828	0	0.232	0	0	0	0.27452	0	0	0.116231	0	0	0.236581	0	0	0	0	0	0.430829	0.542647	0	0.201314	0.22301	0.218598	0	0	0	0	0	0.115204	0.15646	0.208524	0.282108	0	0	0	0	0	0	0	0	0	0.144647	0
D016393	0	0	0	0	0	0.367503	0	0.308773	0.11253	0.22008	0	0	0	0	0.104811	0	0.135641	0.106142	0	0	0	0	0	0.271563	0.619572	0	0	0	0	0	0	0	0	0.132157	0.210748	0.276769	0	0	0	0	0	0	0	0	0	0	0	0.22542	0
D046110	0	0	0	0	0	0	0	0	0	0	0	0	0	0	0	0	0	0	0	0	0	0	0	0	0.155437	0	0	0	0	0	0	0	0	0	0	0	0	0	0	0.500595	0	0	0	0	0	0	0	0	0
D001477	0	0	0	0	0	0	0	0	0	0	0	0	0	0	0.131758	0	0	0	0	0	0	0	0	0.134352	0.1956	0	0	0	0	0	0	0	0	0	0	0	0	0	0	0	0	0	0	0	0	0	0	0	0
D014138	0	0	0	0	0	0	0	0	0	0	0	0.163728	0	0	0	0	0	0	0	0	0	0	0	0.325107	0.143059	0	0	0.20322	0	0	0	0	0	0	0	0	0.124242	0	0	0	0	0	0	0	0	0	0	0	0
D006502	0	0	0	0	0	0.287653	0.128238	0.238567	0	0	0	0	0	0	0	0	0	0	0	0	0	0	0	0.366568	0.209841	0	0	0	0	0.123148	0	0	0	0	0	0	0	0	0	0.109849	0	0	0	0	0.188154	0	0	0.10285	0
D025063	0	0	0	0	0.455325	0	0	0	0	0	0	0	0	0	0.205649	0	0	0	0	0	0.119834	0.763767	0.254901	0	0	0	0	0	0	0.146267	0	0	0.141636	0	0.690612	0.155507	0	0	0	0	0.878149	0	0	0.241482	0	0.114216	0	0	0
D004802	0	0	0.328125	0	0	0.464204	0	0.339247	0.12225	0	0	0.462925	0	0	0	0	0	0	0	0	0	0	0	0.322203	0.46562	0	0	0.156363	0	0	0	0	0	0	0.119893	0.186616	0.291395	0	0	0	0	0	0.140657	0	0.116413	0	0	0.216197	0
D009165	0	0	0.39214	0	0	0.397327	0	0.107036	0	0	0	0.117039	0	0	0	0	0	0	0	0	0	0	0	0.240116	0.307305	0	0	0	0.216313	0	0	0	0	0	0	0	0.102085	0.33752	0	0	0	0	0	0	0	0	0	0.12852	0
D019595	0	0	0	0	0	0	0	0	0	0	0	0	0	0	0	0	0	0	0	0	0	0	0	0	0	0	0	0	0	0	0	0	0	0	0	0	0	0	0	0	0	0	0	0	0	0	0	0	0
D021921	0	0	0	0	0	0	0.140786	0	0	0	0	0	0	0	0	0	0	0	0	0	0	0	0	0.111034	0	0	0	0.255314	0	0	0	0.223328	0	0	0.126427	0	0	0	0	0	0	0	0	0	0	0	0	0	0
D000361	0	0	0	0	0	0	0	0.219771	0	0	0	0	0	0	0	0	0	0	0	0	0	0	0	0.123296	0.307156	0	0	0	0	0	0	0	0	0	0.134122	0	0.471178	0.289091	0	0	0	0	0	0	0	0	0	0.201232	0
D012220	0	0	0	0	0	0.208226	0	0	0	0.123775	0	0	0	0	0	0	0	0	0	0	0	0	0	0	0	0	0	0.119707	0	0	0	0	0	0	0	0	0	0	0	0	0	0	0	0	0	0	0	0	0
D018222	0	0	0	0	0	0.181198	0	0.119328	0	0	0	0.182197	0	0	0	0	0	0	0	0	0	0	0	0.133618	0.139014	0	0	0	0	0	0	0	0	0	0.156132	0.124918	0	0	0	0	0	0	0	0	0	0	0	0	0
D020244	0	0	0	0.140496	0	0	0	0	0	0	0	0	0	0	0	0	0	0	0	0	0	0	0	0	0.102293	0	0	0.112688	0	0	0	0	0	0	0	0	0	0	0	0	0	0	0	0	0	0	0	0	0
D015419	0	0	0	0.120935	0	0	0	0	0	0	0	0	0	0	0.146008	0.345023	0	0	0	0	0.492602	0.506279	0	0	0.106564	0	0.10995	0	0	0	0	0	0	0	0.482352	0.342591	0	0	0	0	0.502259	0.117874	0	0.15018	0	0	0	0	0
D015473	0	0	0	0	0	0.37451	0	0.153907	0	0.143976	0	0.181406	0	0	0.108158	0	0.14607	0.162371	0	0	0	0	0	0.284328	0.64758	0	0.17046	0.279695	0.252547	0	0	0	0	0	0.122925	0.11127	0.127913	0.477975	0	0	0	0	0.13057	0	0	0	0	0	0
D013167	0	0	0	0	0	0.165675	0	0.123883	0	0	0	0.102581	0	0	0	0.102071	0	0	0	0	0	0	0	0.109403	0.184065	0	0.459419	0	0	0	0	0	0	0	0.321287	0.315213	0	0	0	0	0	0.4462	0	0	0	0	0	0.192231	0
D019080	0	0	0	0	0	0	0	0	0.763852	0	0	0	0	0	0	0	0	0	0	0	0	0	0	0	0	0	0	0	0	0	0	0	0	0	0	0	0	0	0	0	0	0	0	0	0	0	0	0	0
D007079	0	0	0	0	0	0	0	0	0	0	0	0	0	0	0	0	0	0	0	0	0	0	0	0.152827	0.218856	0	0	0	0	0	0	0	0	0	0	0	0	0	0	0	0	0	0	0	0	0	0	0	0
D014029	0	0	0	0.189891	0	0	0	0	0	0.161164	0	0	0.411726	0	0.408904	0	0	0	0	0	0	0	0	0.249727	0.140646	0.184879	0	0.118354	0.107041	0	0	0	0	0	0	0	0	0.173845	0	0	0	0	0.102363	0	0	0	0	0.107644	0
D001249	0	0	0.158073	0	0	0.351059	0	0	0	0	0	0	0	0	0	0	0	0.193176	0	0	0	0	0	0.150995	0	0	0	0.381979	0.850807	0	0	0	0	0	0	0	0	0	0	0	0	0	0	0	0.15136	0	0	0	0
D002549	0	0	0	0.106057	0.471223	0	0	0	0	0	0	0	0	0.427284	0.199723	0.12158	0	0	0	0	0	0	0.174858	0	0.173854	0	0	0	0	0	0	0	0	0.174542	0	0.24929	0	0	0	0	0	0	0	0	0	0	0	0.139409	0
D018567	0	0	0	0	0	0.133551	0	0.100847	0.511419	0	0	0.202443	0	0	0	0	0.236194	0	0	0	0	0	0	0.35404	0.281352	0.176538	0	0.114611	0	0.168121	0	0	0	0	0	0	0.243789	0	0	0	0	0	0.11816	0.114745	0	0	0	0.134152	0
D002341	0	0	0	0	0	0	0	0	0	0	0	0	0	0	0	0	0	0	0	0	0	0	0	0	0	0	0	0	0	0	0	0	0	0.138243	0	0.109679	0	0	0	0	0	0	0	0	0	0	0	0	0
D011697	0	0	0	0	0	0	0	0	0	0	0	0	0	0	0	0	0	0	0	0	0	0	0	0	0	0	0	0	0	0	0	0	0	0	0	0	0	0	0	0	0	0	0	0	0	0	0	0	0
D007918	0	0	0	0	0	0	0	0	0	0.230929	0	0	0	0	0	0.185083	0	0	0	0	0	0	0	0	0.221654	0	0	0	0	0	0	0	0	0.297501	0.134618	0.237187	0	0.146112	0	0	0	0	0	0	0	0	0	0	0
D009103	0	0.172516	0	0.233853	0	0.113848	0	0	0	0.260319	0	0	0	0	0.183931	0.101874	0	0	0	0	0.202221	0.101226	0	0.102521	0.234005	0	0.146014	0	0	0	0	0	0.150014	0.16038	0.146871	0.290313	0	0.112334	0	0	0	0.15773	0	0	0	0.161263	0.138977	0.134668	0
D014929	0	0	0	0	0	0	0	0	0	0	0	0	0	0	0	0	0	0	0	0	0	0	0	0	0	0	0	0	0	0	0	0	0	0.11635	0	0	0	0	0	0	0	0	0	0	0	0	0	0	0
D009212	0	0	0	0	0	0	0	0	0	0	0	0	0	0	0	0	0	0	0	0	0	0	0	0	0.161413	0	0	0	0	0	0	0	0	0	0	0.223778	0	0	0	0	0	0	0	0	0	0	0	0	0
D000755	0	0.120148	0	0	0	0	0.142037	0.226017	0.101812	0.120655	0	0	0	0	0	0	0	0.345656	0	0	0	0	0	0.199681	0.289504	0	0.239593	0.348796	0	0	0	0.20355	0	0	0.207163	0.284452	0	0	0	0.253187	0	0	0	0	0.113792	0	0	0.146887	0
D003394	0	0	0	0	0	0	0	0	0	0	0	0	0	0	0.176617	0	0	0	0	0	0	0	0.162826	0	0	0	0	0	0	0.126983	0	0	0	0	0	0.13259	0	0	0	0	0.813079	0	0	0.228346	0.116418	0	0	0	0
D011141	0	0	0	0	0	0	0	0	0	0	0	0	0	0	0.103302	0	0	0	0	0	0	0	0	0	0	0	0	0	0	0	0	0	0	0	0	0	0	0	0	0	0	0	0	0	0	0	0	0.202739	0
D003093	0	0	0	0	0	0.108785	0	0.204316	0	0	0	0.263689	0	0	0.120391	0	0	0	0	0	0	0	0	0.173107	0.267386	0	0	0	0.219775	0	0	0	0	0	0	0.102171	0.383529	0.177462	0	0	0	0.140163	0	0	0	0	0	0.116772	0
D001506	0	0	0	0	0	0	0	0	0	0	0	0	0	0	0	0	0	0	0	0	0	0	0	0	0.10089	0	0	0	0	0.190594	0	0	0	0	0	0	0	0	0	0	0	0	0	0	0	0	0	0	0
D017544	0	0	0	0	0	0.319718	0	0.233928	0	0	0	0.389104	0	0	0	0	0.230128	0	0	0	0	0	0	0.170894	0.197588	0	0.460638	0	0	0	0	0.123221	0	0	0.220862	0.152363	0	0.169125	0	0	0	0.238041	0	0.142734	0	0	0	0.14546	0
D007593	0	0	0	0	0	0	0	0	0	0	0	0	0	0	0	0	0	0	0	0	0	0	0	0	0	0	0	0	0	0	0	0	0	0	0.205728	0	0	0	0	0	0	0	0	0	0	0	0	0	0
D010188	0	0	0	0	0	0	0	0	0	0	0	0	0	0	0.123246	0	0	0	0	0	0	0	0	0.187335	0.243551	0	0	0	0	0	0	0	0	0	0	0	0	0	0	0	0	0	0	0	0	0	0	0.104072	0
D047928	0	0	0	0	0	0	0	0	0	0	0	0	0	0	0	0	0	0	0	0	0	0	0	0	0	0	0	0	0	0	0	0	0	0	0	0	0	0	0	0	0	0	0	0	0	0	0	0	0
D020528	0	0	0	0.388891	0	0	0	0	0	0	0	0	0	0	0.165307	0	0	0	0	0	0.281552	0	0	0	0.15074	0	0	0	0	0	0	0	0	0	0	0	0	0	0	0	0	0	0	0	0	0	0	0	0
D013920	0	0	0	0	0	0.162285	0	0.115864	0	0.193005	0	0	0	0	0	0	0	0	0	0	0	0	0	0.147436	0.266353	0	0	0	0	0	0	0.46666	0	0.133286	0	0	0.350329	0	0	0	0	0.121515	0	0	0.161141	0	0	0	0.253005
D008831	0	0	0	0	0.477679	0	0	0	0.129683	0	0	0	0	0	0.184576	0	0	0	0	0.192465	0	0.777818	0.154952	0	0	0	0	0	0	0.130418	0	0	0.144994	0	0.685878	0.138518	0	0.156031	0	0	0	0	0	0.24676	0	0	0	0	0
D001930	0	0	0	0.483178	0.120242	0	0	0	0	0.152488	0	0	0	0	0.242398	0	0	0.167402	0	0	0	0	0	0	0.153431	0	0	0	0	0	0	0	0	0	0	0	0	0	0	0	0	0	0	0	0	0	0	0	0
D054198	0	0.159031	0.268988	0.220111	0.201813	0.284503	0	0.24689	0.132524	0.20845	0	0.237287	0	0	0.259507	0	0.151006	0	0.103577	0.119938	0.101606	0.170703	0	0.406498	0.658945	0.159838	0.211571	0	0.212069	0	0	0	0	0	0.209337	0.220481	0.256605	0.508614	0	0	0.123838	0.191847	0.120587	0	0	0.194213	0	0.199754	0
D019305	0	0	0	0.254328	0	0	0	0	0	0	0	0	0	0.178315	0	0	0	0	0	0	0	0	0	0	0	0	0	0	0	0	0	0	0	0	0	0	0	0	0	0	0	0	0	0	0	0	0	0	0
D005359	0	0	0	0	0	0	0	0	0.763921	0	0	0	0	0	0	0	0	0	0	0	0	0.135057	0	0	0	0	0	0	0	0	0	0	0	0	0.126997	0	0	0	0	0	0.123382	0	0	0	0	0	0	0	0
D015658	0	0	0	0.115055	0	0.20488	0	0.226975	0	0.133958	0	0.242909	0	0	0.203334	0	0.196098	0	0	0	0	0	0	0.393037	0.478331	0	0.112814	0	0.299114	0	0	0	0	0	0	0.15739	0.454311	0.413157	0	0	0	0	0	0	0	0	0.139842	0.19609	0
D002471	0	0	0	0	0	0.133084	0	0.162017	0	0.160378	0	0	0.148516	0	0	0	0	0.25511	0	0	0	0	0	0.245113	0.175303	0.103977	0	0.271219	0.102579	0	0	0	0	0	0	0	0	0	0	0	0	0	0	0	0	0	0	0	0
D007676	0	0	0	0	0	0.14331	0	0	0	0.10105	0	0	0	0	0.161911	0	0	0.10975	0	0	0	0	0	0.195589	0.232089	0.126312	0	0.104015	0	0	0	0	0	0	0	0.132757	0	0	0	0	0	0	0	0	0	0	0	0.194837	0
D030401	0	0	0	0	0	0	0	0	0	0	0	0	0	0	0	0	0	0	0	0	0	0	0.716706	0	0	0	0	0	0	0	0	0	0	0	0	0.200205	0	0	0	0	0	0	0	0	0	0	0	0	0
D007057	0	0	0	0	0	0	0	0	0	0	0	0	0	0	0.116336	0	0	0	0	0	0	0	0	0	0	0	0	0	0	0	0	0	0	0	0.466342	0.128546	0	0.129878	0	0	0	0	0	0	0	0	0	0	0
D001847	0	0	0	0	0.121992	0.236753	0	0.167631	0	0.160608	0.155099	0	0	0	0.129925	0.199864	0	0	0	0	0	0.413016	0	0.167121	0.246826	0	0.357303	0	0	0	0	0	0	0	0.415882	0.472694	0	0	0	0	0	0	0	0	0	0	0	0.227409	0.305486
D014564	0	0	0	0	0	0.222552	0	0.143048	0	0	0	0	0	0	0	0	0	0	0	0	0	0.327553	0.119169	0	0.137486	0	0	0	0	0.186975	0	0	0	0	0.292224	0	0	0	0	0	0	0	0	0	0	0	0	0	0
D024741	0	0	0	0	0	0	0.525298	0	0	0	0	0	0	0	0	0	0	0	0	0	0	0	0	0.175339	0	0	0	0.185024	0	0	0	0	0	0	0	0	0	0	0	0	0	0	0	0.623351	0	0	0	0	0
D003240	0	0	0	0	0	0	0	0	0	0	0	0	0	0	0	0	0	0	0	0	0	0.242827	0	0.189732	0.313318	0.113956	0.196004	0	0	0	0	0	0	0	0.276904	0.209152	0	0	0	0	0	0	0	0.107241	0	0	0	0	0
D007984	0	0	0	0	0	0	0	0	0	0	0	0	0	0	0	0	0	0	0	0	0	0	0	0	0	0	0	0	0	0.932499	0	0	0	0	0	0	0	0	0	0	0	0	0	0	0	0	0	0	0
D000783	0.591937	0	0	0	0	0.33642	0	0.221066	0	0.158716	0	0	0	0	0	0	0.301983	0	0	0	0	0	0	0.232296	0.19408	0	0.327702	0	0	0	0	0.112236	0	0	0.123879	0.154427	0	0	0	0	0	0	0	0	0	0	0	0	0
D001528	0	0	0	0	0	0.210893	0	0	0	0.297109	0	0	0	0	0	0	0	0	0	0	0	0.104354	0	0.14256	0.266805	0	0.246436	0	0.102764	0	0	0	0	0.16872	0.233407	0.139263	0	0	0	0	0	0.172527	0	0	0	0.182698	0	0.110623	0
D007247	0	0	0	0	0	0.134814	0	0.119862	0	0	0	0	0	0	0.149372	0	0	0	0	0	0	0	0	0.211548	0.114131	0.555543	0	0	0	0.152366	0	0	0	0	0	0	0	0	0	0	0	0	0	0	0	0	0	0	0
D005910	0	0	0	0.321916	0.417035	0.103404	0	0	0.141948	0.423699	0	0	0	0.111983	0.19665	0	0	0.326953	0.31587	0	0	0.221443	0	0.223254	0.289563	0	0.232069	0.309816	0.114241	0	0	0.129646	0	0.252052	0.208401	0.205899	0	0.148684	0	0	0	0.113598	0.285323	0	0	0.44358	0	0.137068	0
D005198	0	0	0	0	0	0	0	0	0	0	0	0	0	0	0	0.154721	0	0	0	0	0	0	0	0	0.189959	0	0	0	0	0	0	0	0	0	0	0.174882	0	0.132775	0	0	0	0	0	0	0	0	0	0	0
D052016	0	0	0	0	0	0	0	0	0	0	0	0	0	0	0	0	0	0	0	0	0	0	0	0	0.355483	0	0	0	0	0	0	0	0	0	0	0	0	0	0	0	0	0	0	0	0	0	0	0	0
D011546	0	0	0	0	0	0	0	0	0	0	0	0	0	0	0.118854	0	0	0	0	0	0	0	0	0	0	0	0	0	0	0	0	0	0	0	0	0	0	0	0	0	0	0	0	0	0	0	0	0.182053	0
D020920	0	0	0	0	0	0	0	0	0	0	0	0	0	0	0	0	0	0	0	0	0	0	0	0	0	0	0	0	0	0	0	0	0	0	0	0	0	0	0	0	0	0	0	0	0	0	0	0	0
D007562	0	0	0	0.222381	0	0	0	0	0	0	0	0	0	0.837944	0.180841	0	0	0	0	0	0.308547	0	0	0	0	0	0	0	0	0	0	0	0	0.144932	0	0	0	0	0	0	0	0	0	0	0	0	0	0	0
D020261	0	0	0	0	0	0	0	0	0	0	0	0	0	0	0.169354	0	0.115706	0	0	0	0	0	0	0.277748	0	0	0	0	0.269925	0	0	0	0	0	0	0.119085	0	0	0	0	0	0	0	0	0	0	0	0	0
D016537	0	0	0	0	0	0	0	0	0	0	0	0	0	0	0	0	0	0	0	0	0	0	0	0	0	0	0	0	0	0	0	0	0	0	0	0	0	0	0	0	0	0	0	0	0	0	0	0	0
D009157	0	0.119042	0	0	0	0	0	0	0	0	0	0	0	0	0	0.371995	0	0	0	0	0.150776	0	0	0	0.170352	0	0	0	0	0	0	0	0	0	0.190915	0.530857	0	0	0	0	0	0	0	0	0	0	0	0.116126	0
D006849	0	0	0	0.22034	0.381406	0	0	0	0.107031	0.449149	0	0	0	0	0.255531	0	0	0	0	0	0.166972	0	0	0	0.200202	0	0	0	0	0	0	0	0	0.127403	0.570864	0.189782	0	0	0	0	0.495218	0	0	0.147718	0	0	0	0	0.308519
D013543	0	0	0	0	0	0	0	0	0	0	0	0	0	0	0	0	0	0	0	0	0	0	0	0	0.173702	0	0	0	0	0	0	0	0	0	0	0	0	0	0	0	0	0	0	0	0	0	0	0	0
D004370	0	0	0	0	0	0	0	0	0	0	0	0	0	0	0	0	0	0	0	0	0	0.144692	0	0	0	0	0	0	0	0	0	0	0	0	0	0	0	0	0	0	0	0	0	0	0	0	0	0	0.162128
D012415	0	0	0	0.110411	0	0	0	0	0	0	0	0	0	0	0	0	0	0	0	0	0	0.638494	0	0	0	0	0	0	0	0	0	0	0.119014	0	0.710521	0.120289	0	0	0	0	0	0	0	0.299264	0	0	0	0	0
D016472	0	0	0	0.109781	0	0	0	0	0	0	0	0	0	0	0	0.549927	0	0	0	0	0.395531	0	0.112778	0	0	0	0	0	0	0	0	0	0	0	0.109733	0.580733	0	0	0	0	0	0	0	0	0	0	0	0	0
D009755	0	0	0	0	0	0	0	0	0	0.340766	0	0	0.151834	0	0.178526	0	0	0	0	0	0	0.181437	0	0	0	0	0	0	0	0	0	0	0	0.645185	0	0	0	0	0	0	0	0	0	0	0	0	0	0	0
D012983	0	0	0	0	0	0.320274	0	0.19049	0.154987	0	0	0	0	0	0	0	0	0.139405	0	0	0	0	0	0.277194	0.37074	0	0.221603	0.139175	0	0	0	0	0	0	0.184409	0.362328	0.107134	0	0	0	0	0	0	0	0	0	0	0.157772	0
D008708	0	0	0	0	0	0	0	0	0	0	0	0	0	0	0	0	0	0	0	0	0	0	0	0	0	0	0	0	0	0	0	0	0	0	0	0	0	0	0	0	0	0	0	0	0	0	0	0	0
D029424	0	0	0	0	0	0.322454	0	0	0	0	0	0	0	0	0	0	0	0.563212	0	0	0	0	0	0.206876	0.126494	0	0	0.814914	0.288569	0	0	0.119117	0	0	0	0.124218	0	0.144515	0	0	0	0.117736	0.259769	0.133644	0.158695	0	0	0	0
D004392	0	0	0	0	0.362764	0	0	0	0	0	0	0	0	0	0.212319	0	0	0	0	0	0	0.787794	0.148246	0	0.10907	0.100078	0	0	0	0.141474	0	0	0	0	0.675042	0.143571	0	0	0	0	0	0	0	0.2374	0.1209	0	0	0.121682	0
D015673	0	0	0	0.150009	0	0	0	0	0	0	0	0	0	0	0	0	0	0	0	0	0	0	0	0	0	0	0	0	0	0	0	0	0	0	0	0	0	0	0	0	0	0	0	0	0	0	0	0	0
D006470	0	0	0	0	0	0.255449	0	0.139348	0.13276	0	0	0	0	0	0	0	0.25555	0.251717	0	0	0	0	0	0.178352	0.284085	0	0	0.217316	0	0	0	0.201926	0	0	0.113067	0	0	0	0	0	0	0	0	0	0	0	0	0	0.161671
D014718	0	0	0	0	0	0	0	0	0	0	0	0	0	0	0	0	0	0	0	0	0	0	0	0	0.115808	0	0	0	0	0	0	0	0	0	0	0	0	0	0	0.169763	0	0	0	0	0	0	0	0	0
D020325	0	0	0	0.115606	0.156578	0	0	0	0	0.413084	0	0	0	0	0.190275	0	0	0	0	0	0.138812	0.154598	0	0	0.13845	0	0	0	0	0	0	0	0	0.38797	0	0.122264	0	0	0	0	0	0.197251	0.119455	0	0	0.223711	0	0	0
D007184	0	0	0	0	0.957708	0	0	0	0	0	0	0	0	0	0.112283	0	0	0	0	0	0	0	0	0	0	0	0	0	0	0	0	0	0	0	0	0.107856	0	0	0	0	0	0	0	0	0	0	0	0	0
D012208	0	0	0	0	0	0.322723	0	0.465684	0	0.190622	0	0	0	0	0	0.102692	0	0	0	0	0	0.19469	0	0.147444	0.336655	0	0	0.335241	0	0	0	0	0	0.151704	0.164033	0	0	0	0	0	0	0	0	0	0	0	0	0	0
D051359	0	0	0	0	0	0	0	0	0	0	0	0	0	0	0	0	0	0	0	0	0	0	0	0	0.551098	0	0	0	0	0	0	0	0	0	0	0	0	0	0	0	0	0	0	0	0	0	0	0	0
D007859	0	0	0	0.110192	0	0	0	0	0	0	0	0	0	0	0	0	0	0	0	0	0	0	0	0	0	0	0	0	0	0	0	0	0	0	0	0	0	0	0	0	0	0	0	0	0	0	0	0	0
D010409	0	0	0	0	0	0	0	0	0	0	0	0	0	0	0	0	0	0	0	0	0	0	0	0	0.130614	0	0	0	0	0	0	0	0	0	0	0.116926	0	0	0	0	0	0	0	0	0	0	0	0	0
D007037	0	0.118431	0	0.188575	0.180009	0	0	0.114004	0	0.161127	0	0	0	0	0.310399	0.131379	0	0.147759	0.124148	0	0.13417	0.432084	0	0.245538	0.259827	0	0	0.133055	0	0	0	0.194653	0	0	0.383054	0.328884	0	0	0	0	0	0	0	0	0	0	0	0.239983	0
D008133	0	0	0	0	0	0.114728	0.213612	0	0	0	0	0	0	0	0	0	0	0	0	0	0	0	0	0	0	0	0	0	0	0	0	0	0	0	0	0	0	0	0	0	0	0	0	0.412095	0	0	0	0	0
D007729	0	0	0	0	0	0	0	0	0	0	0	0	0	0	0	0	0	0	0	0	0.510878	0	0	0	0	0	0	0	0	0	0	0	0	0	0.214925	0	0	0	0	0	0	0	0	0	0	0	0	0	0
D000848	0	0	0	0	0	0	0.170585	0	0	0	0	0	0	0	0.166056	0	0	0	0	0	0	0.5288	0	0	0.110381	0	0	0	0	0.111843	0	0	0	0	0.420813	0	0	0	0	0	0	0	0	0.216669	0.221542	0	0	0.101631	0
D009122	0	0	0	0	0	0	0	0	0	0	0	0	0	0	0	0	0	0	0	0	0	0	0	0	0	0	0	0	0	0	0	0	0	0	0	0	0	0	0	0	0	0	0	0	0	0	0	0	0
D013274	0	0	0	0	0	0.172088	0	0.238569	0	0	0	0.747445	0	0	0	0	0.481419	0	0	0	0	0	0	0.651134	0.289624	0	0.119232	0	0.103024	0	0	0	0	0	0	0	0.115452	0.180186	0	0	0	0	0	0	0	0	0	0.136136	0
D009202	0	0	0	0	0	0.25472	0.383211	0	0	0	0	0	0	0	0	0.107374	0	0.314365	0	0	0	0	0	0.206189	0.157389	0	0.207919	0.377241	0	0	0	0.591318	0	0	0.243562	0.187774	0	0.201687	0	0	0	0	0.406849	0.708262	0.306689	0	0	0	0
D003930	0	0	0	0	0	0	0	0	0	0.271836	0.366077	0	0	0	0	0	0	0	0	0	0	0	0	0	0	0	0	0	0	0	0	0	0	0.447601	0	0	0	0	0	0.73436	0	0	0	0	0	0	0	0	0
D009386	0	0	0	0	0	0	0	0	0.321922	0.15516	0	0.134844	0	0	0	0	0	0	0	0	0	0	0	0.265887	0	0.276762	0	0	0	0	0	0	0	0	0	0	0	0	0	0	0	0	0	0	0	0	0	0.10529	0
D006547	0	0	0	0	0	0	0	0.169852	0	0	0	0	0	0	0	0	0	0	0	0	0	0	0	0.13303	0.160284	0	0	0	0.135544	0	0	0	0	0	0.170999	0.119194	0	0	0	0	0	0	0	0	0	0	0	0.124444	0
D002526	0	0	0	0.104683	0	0	0	0	0	0.102144	0	0	0	0.18362	0.154327	0.112239	0	0	0.434633	0	0.54704	0.174236	0	0	0.118199	0	0.117609	0	0	0	0	0	0.172954	0	0.189578	0.135183	0	0	0	0	0	0	0	0	0	0	0	0	0
D005764	0	0	0	0	0	0	0	0	0	0	0	0	0	0	0	0	0	0	0	0	0	0	0	0.56735	0	0	0	0	0	0	0	0	0	0	0	0	0	0	0	0	0	0	0	0	0	0	0	0	0
D006620	0	0	0	0	0	0	0	0	0	0	0	0	0	0	0.24832	0	0	0	0	0	0	0	0	0.1167	0	0	0	0	0	0	0	0	0	0	0	0	0	0	0	0	0	0	0	0	0	0	0	0	0
D009290	0	0	0	0.174561	0	0	0	0	0	0	0	0	0	0	0.506936	0	0	0	0	0	0	0	0	0	0	0	0	0	0	0	0	0	0.174004	0	0	0	0	0	0	0	0	0	0	0	0	0	0	0	0
D011618	0	0	0	0.305759	0	0	0	0	0	0	0	0	0	0	0.679961	0	0	0	0	0	0	0.148085	0	0	0	0	0	0	0	0	0	0	0.305641	0.144831	0.148073	0	0	0	0	0	0	0	0	0	0	0	0	0.107844	0
D019970	0	0	0	0.317655	0	0	0.170758	0	0.121196	0	0	0	0	0	0.374735	0	0	0	0	0	0	0	0	0.151931	0.15856	0	0.213944	0	0	0	0	0.249872	0.2351	0	0.213721	0	0	0	0	0	0	0	0	0	0	0	0	0.104123	0
D005878	0	0	0	0	0	0	0	0	0	0	0	0	0	0	0	0	0	0	0	0	0	0	0	0	0.123179	0	0	0	0	0	0	0	0	0	0	0	0	0	0	0	0	0	0	0	0	0	0	0	0
D002280	0.310479	0	0	0	0	0.131947	0	0	0	0.251232	0.149097	0	0.168503	0	0	0.128978	0	0	0	0	0	0.35791	0	0.131644	0.330629	0.175366	0.291166	0	0.100095	0.165137	0	0	0	0.131421	0.42527	0.214559	0	0.212117	0	0	0.187681	0.180671	0	0.12179	0	0.152391	0	0.188179	0
D014202	0	0	0	0	0	0	0	0	0	0	0	0	0	0	0.112171	0	0	0	0	0	0	0	0	0	0	0	0	0	0	0	0	0	0.285499	0	0	0	0	0	0	0	0	0	0	0	0	0	0	0	0
D020820	0	0	0	0	0	0	0	0	0	0	0	0	0	0	0	0	0	0	0	0	0	0	0	0	0	0	0	0	0	0	0	0	0	0	0	0	0	0	0	0	0	0	0	0	0	0	0	0	0
D001764	0	0	0	0	0	0	0	0	0	0	0	0	0	0	0	0	0	0	0	0	0	0	0	0	0	0	0	0	0	0	0	0	0.293797	0	0	0	0	0	0	0	0	0	0	0	0	0	0	0	0
D006349	0	0	0	0	0	0	0.93182	0	0	0	0	0	0	0	0	0	0	0	0	0	0	0	0	0	0	0	0	0	0	0	0	0.223891	0	0	0.245895	0	0	0	0	0	0	0	0	0	0	0	0	0	0
D018288	0	0.102252	0	0.118004	0	0.296295	0	0.21813	0	0.153992	0	0.239553	0	0	0.130841	0	0.106655	0.106684	0.178049	0	0.131419	0	0	0.4919	0.622472	0	0.177575	0.161399	0.253646	0	0	0	0.111042	0.106448	0.129131	0.188698	0.144553	0.265712	0	0	0	0.146768	0.110461	0	0	0.139488	0	0.168073	0
D011556	0	0	0	0	0.569805	0	0	0	0	0	0	0	0	0	0.171369	0	0	0	0	0	0	0	0	0	0	0	0	0	0	0	0	0	0	0	0	0.109265	0	0	0	0	0	0	0	0	0	0	0	0	0
D002291	0	0	0	0	0	0.428493	0	0.396118	0	0.152296	0	0.367089	0	0	0	0	0.132328	0	0	0	0	0	0	0.238156	0.233699	0.130907	0.518202	0	0	0.150706	0	0	0	0	0.114666	0.116095	0	0.168272	0	0	0	0	0	0	0	0	0	0.127485	0
D000210	0	0	0	0	0	0	0	0	0	0	0	0	0	0	0	0	0	0	0	0	0	0	0	0.332734	0	0	0	0	0	0	0	0	0	0	0	0	0	0	0	0	0	0	0	0	0	0	0	0	0
D010004	0	0	0	0	0	0	0	0	0	0	0	0	0	0	0	0	0	0	0	0	0	0	0	0	0	0	0	0	0	0	0	0	0	0	0	0	0	0	0	0	0	0	0	0	0	0	0	0	0
D012221	0	0	0	0	0	0	0	0	0	0	0	0	0	0	0	0	0	0	0	0	0	0	0	0	0	0	0	0	0	0	0	0	0	0	0	0	0	0	0	0	0	0	0	0	0	0	0	0	0
D009958	0	0	0	0	0	0	0	0	0	0	0	0	0	0	0.163931	0	0	0	0.105609	0	0	0.856286	0	0	0	0	0.119614	0	0	0	0	0	0.252917	0.116538	0.603946	0.118948	0	0.135819	0	0	0	0	0	0.216671	0	0	0	0	0
D006966	0	0	0	0	0	0	0	0	0	0	0	0	0	0	0.217377	0	0	0	0	0	0	0	0	0.201399	0.158161	0	0	0	0	0.135819	0	0	0	0	0	0	0	0	0	0	0	0	0	0	0	0	0	0.129278	0
D008531	0	0	0	0	0	0	0	0	0	0	0	0	0	0	0	0	0	0	0	0	0	0	0	0	0	0	0	0	0	0	0	0	0	0	0	0	0	0	0	0	0	0	0	0	0	0	0	0	0
D013964	0	0	0.157077	0	0	0.182458	0	0.135182	0	0	0	0.159265	0	0	0	0.110812	0.142353	0	0	0	0	0	0	0.273605	0.217784	0.103731	0.319123	0	0.259493	0	0	0	0	0	0	0	0.273573	0.169575	0	0	0	0	0	0	0	0	0	0.240669	0
D020817	0	0	0	0.220423	0	0	0	0	0	0	0	0	0	0	0.201908	0	0	0	0	0	0	0	0	0	0	0	0	0	0	0	0	0	0	0	0.191684	0	0	0	0	0	0	0	0	0	0	0	0	0	0
D004652	0	0	0	0	0	0	0	0	0	0	0	0	0	0	0	0	0	0	0	0	0	0	0	0	0	0	0	0	0	0	0	0	0	0	0	0	0	0	0	0	0	0	0	0	0	0	0	0	0
D019698	0	0	0.100647	0	0	0	0	0.150962	0	0	0	0	0	0	0.145519	0	0	0	0	0	0	0	0	0.271107	0.316531	0	0	0	0	0	0	0	0	0	0	0.156791	0.440611	0	0	0.100082	0	0	0	0	0	0	0	0	0
D019571	0	0	0	0	0	0	0.207473	0	0	0	0	0	0	0	0	0	0	0	0	0	0	0	0	0	0	0	0	0	0	0	0	0	0	0	0	0	0	0	0	0	0	0	0	0.41976	0	0	0	0	0
D008103	0	0	0	0	0	0.153842	0	0.626762	0	0	0	0.301084	0	0	0.13315	0	0	0.364042	0	0	0	0	0	0.294895	0.276853	0.17206	0.171185	0.354478	0.136379	0	0	0.160814	0	0	0	0.149186	0	0.614136	0	0	0	0	0	0	0.131633	0	0	0.157477	0
D009072	0	0	0	0	0.231586	0	0	0	0.154596	0.192922	0	0	0	0	0	0	0	0.118207	0	0	0	0	0	0	0	0	0	0.102904	0	0	0	0	0	0	0	0.144073	0	0	0	0	0	0	0	0	0	0	0	0	0
D009361	0	0	0	0	0	0.337848	0	0	0	0.143943	0	0	0	0	0	0.259761	0	0.214029	0	0	0	0	0	0	0.169382	0	0	0.207935	0	0	0	0	0	0	0	0.33605	0	0	0	0	0	0	0	0	0	0	0	0	0
D005158	0	0	0	0	0	0	0	0	0	0	0	0	0	0	0	0	0	0	0	0	0	0.136195	0	0	0.151392	0	0	0	0	0	0	0	0	0	0	0	0	0	0	0	0	0	0	0	0	0	0	0	0
D012628	0	0	0	0	0	0	0	0	0	0	0	0	0	0	0	0	0	0	0	0	0	0	0	0	0	0.781724	0	0	0	0.258829	0	0	0	0	0	0	0	0	0	0	0	0	0	0	0	0	0	0	0
D016171	0	0	0	0	0	0.139053	0.220145	0	0	0	0	0	0	0	0	0	0	0	0	0	0	0	0	0	0	0	0	0	0	0	0	0	0	0	0	0	0	0	0	0	0	0	0	0.467631	0	0	0	0	0
D013262	0	0	0	0	0	0.146641	0	0	0.192973	0.16317	0	0.10834	0	0	0.140405	0	0	0	0	0	0	0.113735	0	0.124119	0.409221	0	0.111087	0	0.190873	0	0	0	0.138784	0.165219	0.201437	0.104737	0	0.284083	0	0.121762	0	0.19493	0	0	0	0	0	0.174396	0
D014076	0	0	0	0	0	0	0	0	0	0	0	0	0	0	0	0	0	0	0	0	0	0	0	0	0.157455	0	0	0	0	0	0	0	0	0	0	0.123853	0	0	0	0	0	0	0	0	0	0	0	0	0.155279
D006527	0	0	0	0	0	0	0	0	0	0	0	0	0	0.170252	0.20628	0	0	0	0	0	0.192142	0	0	0	0.105017	0	0	0	0	0	0	0	0	0	0.214452	0.132024	0	0	0	0	0	0	0	0	0	0	0	0.107383	0
D020514	0	0	0	0	0	0	0	0	0	0	0	0	0	0	0	0	0	0	0	0	0	0	0	0	0	0	0	0	0	0	0	0	0	0	0	0	0	0	0	0	0	0	0	0	0	0	0	0	0
D009336	0	0	0	0	0	0	0	0	0	0	0	0	0	0	0.105775	0	0	0	0	0	0	0	0	0	0.39293	0	0	0	0	0	0	0	0	0	0.199791	0	0	0	0	0	0	0	0	0	0	0	0	0	0
D009373	0	0	0	0.101137	0	0.308536	0	0.259254	0	0	0	0	0	0	0.116486	0.165382	0	0	0	0	0	0	0	0.415881	0.594405	0	0	0	0	0	0	0	0	0	0.191872	0.236786	0	0	0	0	0	0	0	0	0	0	0	0.215967	0
D018268	0	0	0	0	0	0.124613	0	0	0	0	0	0	0	0	0	0	0	0	0	0	0	0	0	0	0	0.430883	0	0	0	0.977895	0	0	0	0	0	0	0	0	0	0	0	0	0	0	0	0	0	0	0
D001008	0	0	0	0.234695	0	0	0.107703	0	0	0	0	0	0	0	0.44798	0	0	0	0	0	0	0	0	0.113717	0.122851	0	0.118436	0	0	0	0	0	0.221278	0	0.149184	0.118614	0	0	0	0	0.120146	0	0	0	0	0	0	0.108671	0
D003921	0	0	0	0	0	0	0	0	0	0	0	0	0	0	0.148713	0	0	0	0	0	0	0	0	0.230489	0.102131	0.158757	0	0	0	0	0	0	0	0	0	0	0	0.237107	0	0.553431	0	0	0	0	0	0	0	0.11223	0
D013035	0	0	0	0	0	0	0	0	0	0	0	0	0	0	0	0	0	0	0	0	0	0	0	0	0	0	0	0	0	0	0	0	0	0	0	0	0	0	0	0	0	0	0	0	0	0	0	0	0
D013106	0	0	0	0	0	0	0	0	0	0	0	0	0	0.287931	0	0	0	0	0	0	0	0	0	0	0	0	0	0	0	0	0	0	0	0	0	0	0	0	0	0	0	0	0	0	0	0	0	0	0
D006528	0	0	0	0	0	0.272176	0	0.689548	0	0.102319	0	0.430446	0	0	0	0	0.224748	0.217368	0	0	0	0	0	0.379993	0.510427	0.157777	0.205955	0.229701	0.168248	0	0	0.118497	0	0	0	0.126723	0.136882	0.538825	0	0	0	0	0.185557	0	0	0	0	0.152343	0
D015837	0	0	0	0	0	0	0	0	0	0	0	0	0	0	0	0	0	0	0	0	0	0.115173	0	0	0	0	0.245901	0	0	0	0	0	0	0	0	0	0	0	0	0	0	0	0	0	0	0	0	0	0
D004760	0	0	0	0	0	0	0	0	0	0	0	0	0	0	0	0	0	0	0	0	0	0	0	0.128351	0	0	0	0	0	0	0	0	0	0	0	0	0	0	0	0	0	0	0	0	0	0	0	0	0
D009374	0	0	0	0	0	0	0	0	0	0	0	0	0	0	0	0	0	0	0	0	0	0	0	0.340667	0.116241	0	0	0	0	0	0	0	0	0	0	0	0	0	0	0	0	0	0	0	0	0	0	0	0
D009139	0	0	0	0	0	0.161117	0	0	0	0	0	0	0	0	0	0	0	0	0	0	0	0.499154	0.314837	0	0	0	0	0.149751	0	0	0	0	0	0	0.453637	0.196444	0	0	0	0	0	0	0	0.164886	0	0	0	0	0
D002971	0	0	0	0	0	0	0	0	0	0	0	0	0	0	0.115951	0	0	0	0	0	0	0.318074	0	0	0	0	0.111694	0	0	0	0	0	0	0	0.264188	0	0	0	0	0	0.277364	0	0	0	0	0	0	0	0
D004832	0	0	0	0.11413	0.671505	0	0	0	0	0	0	0	0	0.640228	0.250663	0	0	0	0	0	0	0	0	0	0	0	0	0	0	0	0	0	0	0	0	0	0	0	0	0	0	0	0	0	0	0	0	0	0
D013771	0	0	0	0	0	0	0.182201	0	0	0	0	0	0	0	0	0	0	0.22787	0	0	0	0	0	0	0	0	0	0	0	0	0	0	0	0	0.129083	0	0	0	0	0	0	0	0	0.195949	0	0	0	0	0
D017449	0	0	0	0	0	0	0	0	0	0	0	0	0	0	0	0	0	0	0	0	0	0	0	0	0	0	0	0	0	0	0	0	0	0	0	0	0	0	0	0	0	0	0	0	0	0	0	0	0
D038901	0	0	0	0	0	0	0	0	0	0	0	0	0	0	0.103756	0	0	0	0.135602	0	0.130935	0.273945	0.797242	0	0	0	0	0	0	0	0	0	0.212583	0	0.292691	0.186324	0	0.175166	0	0	0	0	0	0	0	0	0	0.115805	0
D049310	0	0	0	0	0	0	0	0	0	0	0	0	0	0	0	0.285027	0	0	0	0	0	0	0	0	0	0	0	0	0	0	0	0	0	0	0	0.346068	0	0	0	0	0	0	0	0	0	0	0	0	0
D016142	0	0	0	0	0.515288	0	0	0	0	0	0	0	0	0	0.104886	0	0	0	0	0	0	0	0.242798	0	0	0	0	0	0	0	0	0	0	0	0	0.100402	0	0	0	0	0	0	0	0	0	0	0	0	0
D034381	0	0	0	0	0	0	0	0	0	0	0	0	0	0	0	0	0	0	0	0	0	0.128908	0	0	0	0	0.121461	0	0	0	0	0	0	0	0	0	0	0	0	0	0	0	0	0	0	0	0	0	0
D009765	0	0	0	0	0	0	0	0.109379	0	0.132112	0	0	0	0	0.154968	0	0	0	0	0	0	0	0	0.294775	0	0.345563	0	0	0	0	0	0	0	0	0	0	0	0.252178	0	0	0	0	0	0	0	0	0	0	0
D012514	0	0	0	0	0	0.384603	0	0	0	0	0	0	0	0	0	0	0	0	0	0	0	0	0	0.291469	0.517776	0	0	0	0	0	0	0	0	0	0.119258	0	0	0	0	0	0	0	0	0	0	0	0	0.138415	0
D003025	0	0	0	0	0	0	0	0	0	0	0	0	0	0	0	0.62446	0	0	0	0	0	0	0	0	0	0	0	0	0	0	0	0	0	0	0.384024	0.557444	0	0	0	0	0	0	0	0	0	0	0	0	0
D012516	0	0.249921	0	0	0	0.25787	0	0.180256	0	0.114302	0	0.176551	0	0	0	0	0	0.278771	0	0	0.105159	0	0	0.312861	0.394287	0	0.319308	0.285108	0.165283	0	0	0.143161	0	0	0.157632	0.282764	0	0.20816	0	0	0	0.22818	0.33821	0	0	0	0	0.147837	0
D009120	0	0	0	0	0	0	0	0	0	0	0	0	0	0	0	0	0	0	0	0	0	0	0	0	0	0	0	0	0	0	0	0	0	0	0	0	0	0	0	0	0	0	0	0	0	0	0	0	0
D007414	0	0	0	0	0	0.340934	0	0.338614	0	0	0	0.589821	0	0	0	0	0	0	0	0	0	0	0	0.320369	0.36976	0	0.151798	0	0	0	0	0	0	0	0	0.106475	0.283672	0.276328	0	0	0	0	0	0	0	0	0	0.164851	0
D004065	0	0	0	0	0	0	0	0	0	0	0	0	0	0	0	0	0	0	0	0	0	0	0	0	0.169869	0	0	0	0	0	0	0	0	0	0	0	0	0	0	0	0	0	0	0	0	0	0	0	0
D056660	0	0	0	0	0	0.233586	0	0.129638	0	0	0	0	0	0	0	0	0	0	0	0	0	0	0	0	0.624138	0	0	0	0	0	0	0	0	0	0	0	0.114067	0.531707	0	0	0	0	0	0	0	0	0	0	0
D009404	0	0	0	0	0	0	0	0	0	0	0	0	0	0	0	0	0	0	0	0	0	0	0	0	0.137673	0	0	0	0	0	0	0	0	0	0	0	0	0	0	0.406701	0	0	0	0	0	0	0	0	0
D005705	0	0	0	0	0	0	0	0	0	0	0	0	0	0	0	0	0	0	0	0	0	0	0	0	0	0	0	0	0	0	0	0	0	0	0	0	0	0	0	0	0	0	0	0	0	0	0	0	0
D005166	0	0	0	0	0	0	0	0	0	0	0	0	0	0	0	0	0	0	0	0	0	0	0	0	0	0	0	0	0	0	0	0	0	0	0	0	0	0	0	0	0	0	0	0	0	0	0	0	0
D017728	0	0	0	0	0	0	0	0	0	0	0	0	0	0	0	0	0	0	0	0	0	0	0	0	0	0	0	0	0	0	0	0	0	0	0	0	0	0.321308	0	0	0	0	0	0	0	0	0	0	0
D019973	0	0	0	0.247418	0	0.104768	0	0	0	0	0	0	0	0	0.296412	0	0	0	0	0	0	0	0	0	0	0	0	0	0	0	0	0	0	0	0	0	0	0	0	0	0	0	0	0	0	0	0	0	0
D020739	0	0	0	0.135829	0.730751	0	0	0	0	0	0	0	0	0	0.243231	0	0	0	0.149906	0	0	0	0.463955	0	0.101757	0	0	0	0	0	0	0	0	0	0	0.145972	0	0.183079	0	0	0	0	0	0	0	0	0	0	0
D050031	0	0	0	0.350379	0	0	0	0	0	0	0	0	0	0.124462	0.285128	0	0	0	0	0	0	0	0	0	0.179214	0	0	0	0	0	0	0	0	0	0	0	0	0	0	0	0	0	0	0	0	0	0	0	0
D008659	0	0	0	0	0	0.109717	0	0.150123	0	0.171719	0	0	0	0	0.266455	0	0	0.100398	0	0	0	0.128133	0	0.319977	0.166464	0.381936	0	0	0	0	0	0	0	0	0.137706	0	0	0	0	0	0	0	0	0	0	0	0	0.194336	0
D001987	0	0	0	0	0	0.325154	0	0	0	0	0	0	0	0	0	0	0	0.148055	0	0	0	0	0	0.186893	0.132474	0	0	0.252272	0	0	0	0	0	0	0	0	0.103757	0	0	0	0	0	0	0	0	0	0	0	0
D001943	0	0	0	0	0	0.152413	0	0.151413	0	0.145093	0	0.1351	0	0	0.189021	0	0	0	0	0	0	0	0	0.409286	0.393745	0.179375	0	0.105981	0.10706	0	0	0	0	0	0	0.155889	0	0.249317	0	0	0	0	0.185119	0	0	0	0	0.158853	0
D009442	0	0	0	0	0	0	0	0	0	0.165243	0	0	0	0	0	0.16028	0	0	0	0	0	0	0	0	0.204486	0	0	0	0	0	0	0	0	0	0.170097	0.242026	0	0	0	0	0	0	0	0	0	0	0	0	0
D013203	0	0	0	0	0	0	0.166402	0	0.135682	0	0	0	0	0	0	0	0	0	0	0	0	0	0	0.203446	0.626005	0	0	0	0	0	0	0	0	0	0.263381	0	0.18333	0	0	0	0	0	0	0	0	0	0	0	0
D013494	0	0	0	0.182278	0	0	0	0	0	0	0	0	0	0	0	0	0	0	0	0	0.276909	0	0	0	0	0	0	0	0	0	0	0	0	0	0	0	0	0	0	0	0	0	0	0	0	0	0.832963	0	0
D009508	0	0	0	0	0	0	0	0	0.518547	0.182364	0	0	0.110385	0	0.166344	0	0	0	0	0	0	0	0	0	0.128007	0	0	0	0	0.104316	0	0	0	0.165827	0	0.158471	0	0	0	0	0	0	0	0.19119	0	0	0	0	0
D008457	0	0	0	0	0	0	0	0	0.127979	0	0	0	0	0	0	0	0	0.109103	0	0	0	0	0	0.147021	0.525092	0	0	0	0	0	0	0	0	0.194395	0	0	0.304643	0	0	0	0	0	0	0	0	0	0	0	0
D016905	0	0	0	0	0	0	0	0	0	0	0	0	0	0	0	0	0	0	0	0	0	0	0	0.139444	0.365612	0	0	0	0	0	0	0	0	0	0	0	0.38588	0	0	0	0	0	0	0	0	0	0	0	0
D009401	0	0	0	0	0	0	0	0	0	0	0	0	0	0	0	0	0	0	0	0	0	0	0	0	0.128804	0	0	0	0	0	0	0	0	0	0	0	0	0	0	0.537469	0	0	0	0	0	0	0	0	0
D029597	0	0	0	0	0	0	0	0	0	0	0	0	0	0	0	0	0	0	0	0	0	0	0	0	0	0	0	0	0	0	0	0	0	0	0	0	0	0	0	0	0	0	0	0	0	0	0	0	0
D006937	0	0	0	0	0	0.106384	0	0.15732	0	0.153031	0	0	0	0	0.206486	0	0	0	0	0	0	0	0	0.362704	0.154206	0.305698	0	0	0	0	0	0.237526	0	0	0	0	0	0.334019	0	0.212264	0	0	0.217217	0.166015	0	0	0	0.159239	0
D020329	0	0	0	0	0	0	0	0	0	0	0	0	0	0.133643	0.144117	0	0	0	0	0	0	0	0	0	0	0	0	0	0	0	0	0	0.459811	0	0	0	0	0	0	0	0	0	0	0	0	0	0	0	0
D007627	0	0	0	0	0	0	0	0	0	0	0	0	0	0	0	0	0	0.130907	0	0	0	0	0	0	0	0	0	0	0	0	0	0	0	0	0	0	0	0	0	0	0	0	0	0	0	0	0	0.137737	0
D003560	0	0.178684	0	0	0.117811	0	0.121534	0.30141	0	0	0	0	0	0	0	0.100318	0	0	0	0	0	0	0	0.127382	0.239922	0	0.400826	0	0	0	0	0	0	0	0.281769	0.235078	0	0	0	0	0	0	0	0	0	0	0	0.137338	0
D005185	0	0	0	0	0	0.398439	0	0.239024	0	0	0	0.423729	0	0	0	0	0	0	0	0	0	0	0	0	0.164405	0	0	0	0	0	0	0	0	0	0	0	0	0.154101	0	0	0	0	0	0	0	0	0	0	0
D063647	0	0	0	0.127558	0	0	0	0	0	0	0	0	0	0	0	0	0	0	0	0	0	0	0	0	0	0	0	0	0	0	0	0	0	0	0	0	0	0	0	0	0	0	0	0	0	0	0	0	0
D014897	0	0	0	0	0	0	0	0	0	0	0	0	0	0	0	0.452136	0	0	0.119181	0	0.119327	0	0.312088	0	0	0	0	0	0	0	0	0	0	0	0.101691	0.495526	0	0	0	0	0	0	0	0	0	0	0	0	0
D009221	0	0	0	0	0	0	0	0	0	0	0	0	0	0	0	0	0	0	0	0	0	0	0	0	0.112346	0	0	0	0	0	0	0	0	0	0	0	0	0	0	0	0	0	0	0	0	0	0	0	0
D016080	0	0	0	0.149007	0	0	0	0	0	0	0	0	0	0	0	0	0	0	0	0	0	0	0	0	0.18996	0	0	0	0	0	0	0	0	0	0	0	0	0	0	0	0	0	0	0	0	0	0	0	0
D020159	0	0	0	0	0.471377	0	0	0	0	0	0	0	0	0	0	0	0	0	0	0	0	0	0	0	0.140527	0	0	0	0	0	0	0	0	0	0	0	0	0	0	0	0	0	0	0	0	0	0	0	0
D002252	0	0	0	0	0	0	0	0.139112	0	0	0	0	0	0	0	0	0	0	0	0	0	0	0	0.200244	0.151526	0	0	0.28633	0	0	0	0	0	0	0	0	0	0	0	0.172665	0	0	0	0	0	0	0	0	0
D010787	0	0	0	0	0	0	0	0	0.221304	0	0	0	0	0.209704	0.128989	0	0	0	0	0	0	0	0	0	0.187948	0	0	0	0	0	0	0	0	0.149964	0.288372	0	0	0	0	0	0	0	0	0	0	0	0	0	0
D028227	0	0	0	0	0	0	0	0	0	0	0	0	0	0	0	0	0	0	0	0	0	0	0	0	0.183428	0	0	0	0	0	0	0	0	0	0	0.164022	0	0	0	0	0	0	0	0	0	0	0	0	0
D008109	0	0	0	0	0	0	0	0	0	0	0	0	0	0	0	0	0	0	0	0	0	0	0	0.447142	0	0	0	0	0	0	0	0	0	0	0	0	0	0	0	0	0	0	0	0	0	0	0	0	0
D004814	0	0	0	0	0	0	0	0.128372	0	0.252853	0	0	0	0	0	0	0	0	0	0	0	0	0	0	0.226358	0	0.416764	0	0	0	0	0	0	0	0	0	0	0	0	0	0	0	0	0	0	0	0	0	0
D001791	0	0	0	0	0	0	0	0	0	0	0	0	0	0	0	0	0	0	0	0	0	0	0	0	0.173442	0	0	0	0	0	0	0	0	0	0	0	0.132425	0	0	0	0	0	0	0	0	0	0	0	0
D007251	0	0	0	0	0.140359	0	0	0.113362	0	0	0	0	0	0	0.166431	0	0	0.190688	0	0	0	0	0	0.292834	0.590416	0	0	0	0	0	0	0	0	0	0.109268	0.110632	0.168012	0	0	0	0	0	0	0	0	0	0	0.124269	0
D009999	0	0	0	0	0	0.111862	0	0	0	0	0	0	0	0	0	0.118696	0	0	0	0	0.124872	0	0	0	0.241867	0	0	0	0	0	0	0	0	0	0	0.220106	0	0	0	0	0	0	0.231498	0	0	0	0	0	0
D011471	0	0	0.146257	0	0	0.13127	0	0.125606	0	0.105187	0	0	0	0	0.100932	0	0	0	0	0	0	0	0	0.25167	0.222228	0.138835	0.123706	0	0	0	0	0	0	0	0.134472	0.160107	0	0.170887	0	0	0	0	0.172585	0	0	0	0	0.11517	0
D005885	0	0	0	0	0	0	0	0	0.148247	0	0	0	0	0	0	0	0	0	0	0	0	0	0	0	0.192845	0	0	0	0	0	0	0.185918	0	0	0.301445	0	0	0	0	0	0	0	0	0	0	0	0	0.102781	0.376604
D018221	0	0	0	0	0	0.397303	0	0.306048	0	0	0	0.504037	0	0	0	0	0	0	0	0	0	0	0	0	0.201521	0	0	0	0	0	0	0	0	0	0	0	0	0	0	0	0	0	0	0	0	0	0	0	0
D000015	0	0	0	0	0.42314	0	0	0	0	0	0	0	0	0	0.179096	0	0	0	0	0.227301	0	0.850732	0.18633	0	0	0	0	0	0	0.134118	0	0	0.136215	0	0.699281	0.148178	0	0.18302	0	0	0.870029	0	0	0.256374	0.137425	0	0	0	0
D004422	0	0	0	0	0	0	0	0	0	0	0	0	0	0.110908	0	0	0	0	0	0	0	0	0	0	0	0	0	0	0	0	0	0	0	0	0	0.174789	0	0	0	0	0	0	0	0	0	0	0	0	0
D000592	0	0	0	0	0.552898	0	0	0	0.118922	0	0	0	0	0	0.203184	0	0	0	0.118048	0	0	0.76596	0.137152	0	0.101309	0	0	0	0	0.126095	0	0	0	0	0	0.151868	0	0.167492	0	0	0	0	0	0.239042	0	0	0	0	0
D010859	0	0.115961	0	0	0	0	0	0.121622	0.438357	0.118615	0	0	0	0	0.120336	0	0	0	0	0	0	0.672624	0	0	0.169263	0	0.161981	0	0	0	0	0	0	0.103342	0.425847	0.138595	0	0.254065	0	0	0	0	0	0.15838	0	0	0	0.113515	0
D020795	0	0	0	0	0	0	0	0	0	0	0	0	0	0	0	0	0	0	0	0	0	0	0	0	0	0	0	0	0	0	0	0	0	0	0	0	0	0	0	0	0	0	0	0	0	0	0	0	0
D010245	0	0	0	0	0	0	0	0	0	0	0	0	0	0	0	0	0	0	0	0	0	0	0	0	0	0	0	0	0	0	0	0	0	0	0	0	0	0	0	0	0	0	0	0	0	0	0	0	0
D000742	0	0	0	0	0	0	0	0	0	0	0	0	0	0	0	0	0	0	0	0	0	0	0	0	0	0	0	0	0	0	0	0	0	0	0	0	0	0	0	0	0	0	0	0	0	0	0	0	0
D006504	0	0	0	0	0	0	0	0.7276	0	0	0	0	0	0	0	0	0	0	0	0	0	0	0	0	0.14886	0	0	0	0	0	0	0	0	0	0	0	0	0	0	0	0	0	0	0	0	0	0	0	0
D015207	0	0	0	0	0	0	0	0	0	0	0	0	0	0	0	0.108232	0	0	0	0	0	0	0	0	0	0	0	0	0	0	0	0	0	0	0	0	0	0	0	0	0	0	0	0	0	0	0	0	0
D047748	0	0	0	0	0	0	0	0	0	0	0	0	0	0	0	0	0	0	0	0	0	0	0	0	0	0.758956	0	0	0	0.435076	0	0	0	0	0	0	0	0	0	0	0	0	0	0	0	0	0	0	0
D010022	0	0	0	0	0	0	0	0	0	0.227556	0.245727	0	0	0	0	0	0	0	0	0	0	0	0	0	0.239476	0	0	0	0	0	0	0	0	0.235689	0.319647	0.142472	0	0.152111	0	0	0	0	0	0	0	0	0	0	0
D049950	0	0	0	0	0	0	0	0	0	0	0	0	0	0	0	0	0	0	0	0	0	0	0	0	0	0	0	0	0	0	0	0	0	0	0	0	0	0	0	0	0	0	0	0	0	0	0	0.311546	0
D017563	0	0	0	0	0	0	0	0	0	0	0	0	0	0	0	0	0	0	0	0	0	0	0	0.198178	0.220328	0	0	0	0	0	0	0	0	0	0	0	0.199617	0	0	0	0	0	0	0	0	0	0	0	0
D001745	0	0	0	0	0	0	0	0	0	0	0	0	0	0	0	0	0	0	0	0	0	0	0	0	0	0	0	0	0	0	0	0	0	0	0.11129	0	0	0	0	0	0	0	0	0	0	0	0	0	0
D015417	0	0	0	0	0	0	0	0	0	0	0	0	0	0	0	0.446158	0	0	0.233937	0	0	0	0.362599	0	0.132802	0	0.152914	0	0	0	0	0	0	0	0	0.521371	0	0	0	0	0	0	0	0	0	0	0	0	0
D006628	0	0	0	0	0	0	0	0	0	0	0	0	0	0	0	0	0	0	0	0	0	0	0	0	0	0	0	0	0	0	0	0	0	0	0	0	0	0	0	0	0	0	0	0	0	0	0	0	0
D009224	0	0	0	0	0	0	0	0	0	0	0	0	0	0	0	0	0	0	0	0	0	0	0.103221	0	0	0	0	0	0	0	0	0	0	0	0	0	0	0	0	0	0	0	0	0	0	0	0	0	0
D010018	0	0	0	0	0	0	0	0	0	0	0	0	0	0	0	0	0	0	0	0	0	0	0.108709	0	0.18465	0	0	0	0	0	0	0	0	0	0	0	0	0	0	0	0	0	0	0	0	0	0	0	0
D008228	0	0	0	0	0	0.385031	0	0.401323	0.136678	0.247222	0	0.332758	0	0	0.133776	0	0	0	0	0	0	0.104063	0	0.446138	0.789389	0	0.286152	0.119958	0.279245	0	0.335638	0	0	0.142272	0.185238	0.226529	0.384886	0.560727	0	0	0	0	0	0	0	0	0	0.226675	0
D007970	0	0	0	0	0	0	0	0.133879	0	0	0	0	0	0	0.124839	0	0	0.362988	0	0	0	0	0	0.275962	0.634749	0	0.135003	0.344207	0	0	0	0.124131	0	0	0	0	0	0	0	0	0	0	0	0	0	0	0	0	0
D007948	0	0	0	0	0	0.187464	0	0.205505	0	0	0	0.219782	0	0.111781	0	0	0.122851	0	0	0	0	0.100143	0	0.19736	0.47242	0	0.181124	0	0.120014	0	0	0	0	0	0	0.135192	0	0	0	0	0	0	0.108548	0	0	0	0	0.124879	0
D015324	0	0	0	0	0.581796	0	0	0	0	0	0	0	0	0	0.159573	0	0	0	0	0	0	0	0	0	0	0	0	0	0	0	0	0	0	0	0	0.152387	0	0	0	0	0	0	0	0	0	0	0	0	0
D010003	0	0	0	0	0	0.103105	0	0.141131	0	0	0	0.120311	0	0	0	0	0	0	0	0	0	0	0	0.263348	0.123399	0.1452	0.157759	0	0	0	0	0	0	0	0.112248	0.347832	0	0.161737	0	0	0	0.290819	0.102458	0	0	0	0	0.156823	0
D007645	0	0	0	0	0	0	0	0	0	0	0	0	0	0	0	0.161554	0	0	0	0	0	0.653002	0	0	0	0	0.142407	0	0	0	0	0	0	0	0.280076	0.151325	0	0	0	0	0	0	0	0	0	0	0	0	0
D005322	0	0	0	0	0	0	0	0	0	0	0	0	0	0	0	0	0	0	0	0	0	0	0	0	0.114875	0	0	0	0	0	0	0	0	0	0	0	0	0	0	0	0	0	0	0	0	0	0	0	0
D018287	0	0	0	0	0	0	0	0	0	0	0	0	0	0	0	0	0	0	0	0	0	0	0	0.121338	0	0	0	0	0	0	0	0	0	0	0	0	0	0	0	0	0	0	0	0	0	0	0	0	0
D017253	0	0	0	0	0	0	0	0	0.759577	0	0	0	0	0	0	0	0	0	0	0	0	0	0	0	0	0	0	0	0	0	0	0	0	0	0	0	0	0	0	0	0	0	0	0	0	0	0	0	0
D009421	0	0	0	0.212666	0.343424	0	0	0	0	0	0	0	0	0	0.198813	0	0	0	0	0	0.140962	0.391483	0.158527	0	0	0	0	0	0	0	0	0	0	0	0.364298	0.152397	0	0	0	0	0	0	0	0	0	0	0	0	0
D007766	0	0	0	0	0	0	0	0	0	0	0.290472	0	0	0	0	0.10246	0	0	0	0	0	0	0	0	0.206197	0	0	0	0	0	0	0	0	0	0	0.1613	0	0	0	0	0	0	0	0	0	0	0	0	0
D013119	0	0	0	0	0	0	0	0	0	0	0	0	0	0	0	0	0	0	0	0	0	0	0	0	0.177047	0	0	0	0	0	0	0	0	0	0	0.160739	0	0	0	0	0	0	0	0	0	0	0	0	0
D019966	0	0	0	0.37992	0	0.125461	0.102763	0.122578	0.102627	0.155183	0	0	0	0	0.56407	0	0	0	0	0	0.108176	0.123794	0	0.185499	0.230311	0	0.13121	0	0.122142	0	0	0	0.242354	0.120968	0.1802	0.168979	0	0.191972	0	0	0.135547	0.126653	0.144039	0	0	0	0	0.180217	0
D012120	0	0	0	0	0	0.252886	0	0	0	0	0	0	0	0	0.108667	0	0	0	0	0	0	0	0	0.123176	0	0	0	0	0	0	0	0	0	0	0	0	0	0	0	0	0	0	0	0	0	0	0	0	0
D014380	0	0	0	0	0	0	0	0	0	0	0	0	0	0	0	0	0	0	0	0	0	0	0	0.169154	0.362516	0	0	0	0	0	0	0	0	0	0	0	0	0	0	0	0	0	0	0	0	0	0	0	0
D013981	0	0	0	0	0	0	0	0	0	0	0	0	0	0.181374	0.212031	0	0	0	0	0	0	0	0	0	0	0	0	0	0	0	0	0	0.4023	0	0	0	0	0	0	0	0	0	0	0	0	0	0	0	0
D047728	0	0	0	0	0	0	0	0	0	0	0.627155	0	0	0	0	0	0	0	0	0	0	0.209273	0	0	0	0	0	0	0	0	0	0	0	0.720173	0	0	0	0	0	0	0	0	0	0	0	0	0	0	0
D008607	0	0	0	0	0.408622	0	0	0	0	0	0	0	0	0	0.162155	0	0	0	0	0.182316	0	0.771466	0	0	0	0	0	0	0	0.127833	0	0	0.134566	0	0.684299	0.112333	0	0.129892	0	0	0.829603	0	0	0.250561	0.105325	0	0	0	0
D001928	0	0	0	0.180705	0.52568	0	0	0	0	0.110529	0	0	0	0.388826	0.285621	0	0	0.10086	0	0	0	0	0.347893	0	0.141922	0	0	0	0	0	0	0	0	0	0	0	0	0	0	0	0	0	0	0.123521	0	0	0	0	0
D007966	0	0	0	0.130267	0	0	0	0	0	0	0	0	0	0.104376	0.247688	0.109772	0	0	0	0	0	0	0.129825	0	0.120988	0	0	0	0	0	0	0	0	0	0	0	0	0	0	0	0	0	0	0	0	0	0	0	0
D009896	0	0	0	0	0	0	0	0	0	0	0	0	0.263525	0	0	0.114753	0	0	0	0	0	0	0	0	0	0	0	0	0	0	0	0	0	0.745726	0	0	0	0	0	0	0	0	0	0	0	0	0	0	0
D001768	0	0	0	0	0	0	0	0	0	0	0	0	0	0	0	0	0	0	0	0	0	0	0	0	0.299583	0	0	0	0	0	0	0	0	0	0.124613	0	0	0	0	0	0	0	0	0	0	0	0	0	0.615022
D020752	0	0	0	0	0.574777	0	0	0	0.612235	0	0	0	0	0	0.161311	0	0	0	0	0	0	0	0.120096	0	0.11334	0	0	0	0	0	0	0	0.106904	0	0	0.139752	0	0	0	0	0	0	0	0	0	0	0	0	0
D020301	0	0	0	0	0	0	0	0	0	0	0	0	0	0	0	0	0	0	0	0	0	0	0	0	0.172937	0	0	0	0	0	0	0	0	0	0.134713	0	0	0	0	0	0	0	0	0	0	0	0	0	0
D008569	0	0	0	0.842904	0	0	0	0	0	0	0	0	0	0	0.227965	0	0	0	0	0	0.133046	0	0	0	0	0	0	0	0	0	0	0	0	0	0	0	0	0	0	0	0	0	0	0	0	0	0	0	0
D016893	0	0	0	0	0	0	0	0	0	0.159808	0	0	0	0	0	0	0	0	0	0	0	0	0	0	0	0	0.122256	0	0	0	0	0.13384	0	0.133262	0	0.103758	0	0	0	0	0	0	0	0.143017	0	0	0	0	0
D013398	0	0	0	0	0	0	0	0	0	0	0	0	0	0	0	0	0	0.337215	0	0	0	0	0	0	0	0	0	0.328713	0	0	0	0	0	0	0	0	0	0	0	0	0	0	0	0	0	0	0	0	0
D008325	0	0	0	0	0	0	0	0	0	0	0	0	0	0	0.108063	0	0	0.33927	0	0	0	0	0	0.251231	0.109526	0	0	0.320195	0	0	0	0.120529	0	0	0	0	0	0	0	0	0	0	0	0	0	0	0	0	0
D046152	0	0	0	0	0	0.460553	0	0.425456	0	0	0	0	0	0	0	0	0.61522	0	0	0	0	0	0	0.395244	0.216636	0	0.221567	0	0	0	0	0	0	0	0	0	0.109739	0.239512	0	0	0	0	0	0	0	0	0	0.126658	0
D006010	0	0	0	0	0	0	0	0	0	0	0	0	0	0	0	0	0	0	0	0	0	0	0.679246	0	0	0	0	0	0	0	0	0	0	0	0	0.182566	0	0	0	0	0	0	0	0	0	0	0	0	0
D010008	0	0	0	0	0	0	0	0	0	0	0	0	0	0	0	0	0	0	0	0	0	0	0	0	0	0	0	0	0	0	0	0	0	0	0	0.16251	0	0	0	0	0	0	0	0	0	0	0	0	0
D012852	0	0	0	0	0	0.182997	0	0	0	0.380321	0	0	0	0	0	0	0	0	0	0	0	0	0	0.107498	0.228302	0	0	0	0	0	0	0	0	0.145861	0.173463	0.12212	0	0	0	0	0	0	0	0	0	0	0	0	0
D000417	0	0	0	0	0	0	0	0	0	0.389521	0	0	0	0	0.116639	0	0	0	0	0	0	0	0	0	0	0	0	0	0	0	0	0	0	0.413637	0	0	0	0	0	0	0	0	0	0	0	0	0	0	0
D000419	0	0	0	0	0	0	0	0	0	0	0	0	0	0	0	0	0	0	0	0	0	0	0	0	0	0	0	0	0	0	0	0	0	0	0	0	0	0	0	0	0	0	0	0	0	0	0	0	0
D042882	0	0	0	0	0	0	0	0	0	0	0	0	0	0	0	0	0	0	0	0	0	0	0	0.322817	0.210687	0	0	0	0	0	0	0	0	0	0	0	0	0	0	0	0	0	0	0	0	0	0	0	0
D018149	0	0	0	0	0	0	0	0.106265	0	0.136277	0	0	0	0	0.192038	0	0	0	0	0	0	0	0	0.302947	0	0.340441	0	0	0	0	0	0	0	0	0	0	0	0	0	0.153869	0	0	0	0	0	0	0	0.109598	0
D008588	0	0	0	0	0	0	0	0	0	0	0	0	0	0	0	0	0	0	0	0	0	0	0	0	0	0	0	0	0	0	0	0	0	0	0	0	0	0	0	0	0	0	0	0	0	0	0	0	0
D016603	0	0	0	0	0	0	0	0	0	0	0	0	0	0.265299	0.135203	0	0	0	0	0	0	0	0	0.136418	0.234562	0	0	0	0	0	0	0	0	0	0	0.228499	0	0	0	0	0	0	0	0	0	0	0	0	0
D000138	0	0	0	0	0.114912	0	0	0	0	0	0	0	0	0	0	0	0	0.856381	0	0	0	0	0	0	0.128766	0	0	0	0	0	0	0	0	0	0	0	0	0	0	0	0	0	0	0	0	0	0	0	0
D012206	0	0.182823	0	0	0	0	0	0.110511	0	0	0	0	0	0.113879	0.138464	0.126685	0	0.119354	0	0	0	0	0	0.152386	0.350247	0	0.152957	0	0	0	0	0	0	0	0.137697	0.350979	0	0	0	0	0	0	0	0	0	0	0	0.256143	0
D020389	0	0	0	0	0	0	0	0	0	0	0	0	0	0	0	0.740073	0	0	0	0	0.180294	0	0	0	0	0	0	0	0	0	0	0	0	0	0	0.608425	0	0	0	0	0	0.279879	0	0	0	0	0	0	0
D005776	0	0	0	0	0	0	0	0	0	0	0	0	0	0.300055	0	0	0	0	0	0	0	0	0	0	0.186031	0	0	0	0	0	0	0	0	0	0	0	0	0	0	0	0	0	0	0	0	0	0	0	0
D006951	0	0	0	0	0	0	0	0.111521	0	0.14427	0	0	0	0	0.158251	0	0	0	0	0	0	0	0	0.288567	0	0	0	0	0	0	0	0	0	0	0	0	0	0	0	0	0	0	0	0.152598	0	0	0	0.123103	0
D007010	0	0	0	0	0.609334	0	0	0	0.203704	0.110648	0	0	0	0	0.212428	0	0	0.118354	0	0	0	0	0	0.117878	0.226038	0	0	0	0	0	0	0	0	0	0	0	0	0	0	0	0	0	0	0	0	0	0	0	0
D000707	0	0	0	0	0.102809	0	0.13617	0.108198	0	0	0	0	0	0	0	0	0	0.167828	0	0	0	0	0	0.249185	0.273949	0	0	0.232774	0	0	0	0	0	0	0.140287	0	0	0	0	0	0	0	0	0	0	0	0	0	0
D005315	0	0	0	0	0	0	0	0	0	0	0	0	0	0	0	0	0	0.24325	0	0	0	0.103105	0	0	0	0	0	0.222023	0	0	0	0	0	0	0	0	0	0	0	0	0.341856	0	0	0	0	0	0	0	0
D005183	0	0	0	0	0	0	0	0.103781	0	0	0	0	0	0	0.310771	0	0	0	0	0	0	0.146012	0.217768	0.252134	0.174902	0	0	0	0.18863	0	0	0	0	0	0.157155	0	0.100321	0.226821	0	0	0	0	0	0	0	0	0	0.12018	0
D012148	0	0	0	0.132713	0	0	0	0	0	0	0	0	0	0.352192	0.383521	0	0	0	0	0	0	0	0	0	0	0	0	0	0	0	0	0	0	0	0	0.11698	0	0	0	0	0	0	0	0	0	0	0	0	0
D054082	0	0	0	0	0.734575	0	0	0	0	0	0	0	0	0	0.110625	0	0	0	0.116141	0	0.108521	0.479114	0.269971	0	0	0	0	0	0	0	0	0	0	0	0.390688	0.117519	0	0	0	0	0	0	0	0	0	0.232892	0	0	0
D001848	0.149525	0.150635	0	0	0.348697	0	0	0	0.126508	0	0	0	0	0	0.167364	0.103861	0	0	0	0	0	0.875183	0	0	0.1106	0.114235	0.179118	0	0	0.131092	0	0	0.12653	0	0.64664	0.1977	0	0.196499	0	0	0.742113	0	0	0.22402	0.130503	0	0	0.102804	0
D018487	0	0	0	0	0	0	0	0	0	0	0	0	0	0	0	0	0	0	0	0	0	0	0	0	0	0	0	0	0	0	0	0.511439	0	0	0	0	0	0	0	0	0	0	0	0	0	0	0	0	0
D055665	0	0	0	0	0	0	0	0	0	0	0	0	0	0	0	0	0	0	0	0	0	0	0	0	0	0	0	0	0	0	0	0	0	0	0	0	0	0	0	0	0	0	0	0	0	0	0	0	0
D001327	0	0	0	0	0	0.129697	0	0	0	0	0	0	0	0	0	0	0	0	0	0	0	0.10892	0	0	0.23043	0	0	0	0	0	0	0	0	0	0	0	0.555593	0.203878	0	0.107058	0	0	0	0	0	0	0	0	0
D006394	0	0.126988	0	0	0	0.402363	0.152505	0.139097	0	0.136376	0	0.146102	0	0	0	0	0	0.134558	0	0	0	0	0	0.219805	0.228408	0	0	0.175065	0.138308	0	0	0.138304	0	0	0.130683	0	0	0.258608	0	0	0	0.109971	0.192982	0.169733	0.105329	0	0	0	0
D020426	0	0	0	0	0	0	0	0	0	0	0	0	0	0	0	0	0	0	0	0	0.240296	0	0	0	0	0	0	0	0	0	0	0	0	0	0	0.140832	0	0	0	0	0	0	0	0	0	0	0	0	0
D003554	0	0	0	0	0	0	0	0	0	0	0	0	0	0	0	0	0	0	0	0	0	0	0	0	0	0	0	0	0	0	0	0	0	0	0	0	0	0	0	0	0	0	0	0	0	0	0	0	0
D018242	0	0	0	0.14313	0	0.168912	0	0.126156	0	0.227262	0	0	0	0	0.183922	0	0	0	0	0	0	0	0	0.205648	0.278136	0	0.325915	0	0	0	0	0	0	0	0.217802	0.152647	0	0	0	0	0	0	0	0	0	0	0	0.136629	0
D008439	0	0	0	0	0	0	0	0	0	0	0	0	0	0	0	0	0	0	0	0	0	0	0	0	0.203662	0	0	0	0	0	0	0	0	0	0.129576	0.125858	0	0	0	0	0	0	0	0	0	0	0	0	0.419243
D002375	0	0	0	0	0	0	0	0	0	0	0	0	0	0	0	0	0	0	0	0	0	0	0	0	0	0	0	0	0	0	0	0	0.231375	0	0	0	0	0	0	0	0	0	0	0	0	0	0	0	0
D018283	0	0	0	0	0	0	0	0	0	0	0	0	0	0	0	0	0	0	0	0	0	0	0	0	0	0	0	0	0	0	0	0	0	0	0	0	0	0	0	0	0	0	0	0	0	0	0	0	0
D001321	0	0	0	0	0	0	0	0	0	0	0	0	0	0	0.162246	0	0	0	0	0.120342	0	0.434242	0	0	0	0	0	0	0	0	0	0	0	0	0.446285	0	0	0	0	0	0.452543	0	0	0.146056	0	0	0	0	0
D015451	0	0	0	0	0	0.179832	0	0.107184	0	0.106852	0	0	0	0	0	0	0	0	0	0	0	0	0	0.147639	0.33918	0	0.101331	0.106703	0.151952	0	0	0	0	0	0	0.105214	0.866392	0.31223	0	0	0	0	0	0	0	0	0	0	0
D011542	0	0	0	0	0	0	0	0	0	0	0	0	0	0	0	0	0	0	0	0	0	0	0	0	0	0	0	0	0	0	0	0	0	0	0.237263	0	0	0	0	0	0	0	0	0	0	0	0	0	0
D008342	0	0	0	0	0	0	0	0	0	0	0	0	0	0	0	0	0	0	0	0	0	0	0	0	0	0	0	0	0	0	0	0	0	0	0.315868	0	0	0	0	0	0	0	0	0	0	0	0	0	0
D003919	0	0	0	0	0	0	0	0	0	0.107751	0	0	0	0	0.123311	0	0	0	0	0	0	0	0	0	0	0	0	0	0	0	0	0	0	0	0	0	0	0	0	0	0	0	0	0	0	0	0	0	0
D009164	0	0	0	0	0	0	0	0	0	0	0	0	0	0	0	0	0	0	0	0	0	0	0	0.132716	0.440382	0	0	0	0	0	0	0	0	0	0	0	0	0	0	0	0	0	0	0	0	0	0	0	0
D006332	0	0	0	0	0	0	0.18298	0	0	0	0	0	0	0	0	0	0	0.432516	0	0	0	0	0	0.235423	0.122821	0.105073	0.186163	0.426944	0.107381	0	0	0.344407	0	0	0.112286	0	0	0.231952	0	0.100006	0	0	0.431198	0.313911	0.194006	0	0	0	0
D006933	0	0	0	0	0	0	0	0	0	0	0	0	0	0	0	0	0	0	0	0	0	0	0	0	0.134383	0	0	0	0	0	0	0	0	0	0	0	0	0	0	0	0	0	0	0	0	0	0	0	0
D002813	0	0	0	0	0	0	0.100526	0.101487	0	0.177444	0	0	0	0	0	0	0	0.197143	0	0	0	0.130082	0	0.197281	0.170393	0	0.581728	0.305785	0	0	0	0.113169	0	0.101906	0.205546	0.158854	0	0	0	0	0	0	0	0	0	0	0	0	0
D011596	0	0	0	0	0	0	0	0	0	0	0	0	0	0	0.187434	0	0	0	0	0	0	0	0	0	0	0	0	0	0	0	0	0	0	0	0	0	0	0	0	0	0	0	0	0	0	0	0	0	0
D006333	0	0	0	0	0	0.208331	0.135563	0	0	0	0	0	0	0	0	0	0	0.220609	0	0	0	0	0	0.199801	0.125577	0	0.122614	0.338736	0.112806	0	0	0.350377	0	0	0	0.100837	0	0.159899	0	0	0	0	0.286916	0.357827	0.158506	0	0	0	0
D005351	0	0	0	0	0	0	0	0	0	0	0	0	0	0	0	0	0	0	0	0	0	0	0	0	0	0	0	0	0	0	0	0	0	0	0.647062	0	0	0	0	0	0	0	0	0	0	0	0	0	0
D010009	0	0	0	0	0.264959	0.122089	0	0	0.145324	0	0	0	0	0	0.119216	0	0	0	0.107734	0.165189	0	0.627737	0.174088	0	0.127937	0	0.128787	0	0	0	0	0	0	0	0.47718	0.374309	0	0.187989	0	0	0	0	0	0.168789	0.113107	0	0	0	0
D007007	0	0	0	0	0	0	0	0	0	0	0	0	0	0	0	0	0	0	0	0	0.172161	0	0	0	0.151704	0	0.120123	0	0	0	0	0	0	0	0	0	0	0	0	0	0	0	0	0	0	0	0	0	0
D001161	0	0	0	0	0	0	0	0	0	0.126159	0	0	0	0	0.112478	0	0	0.102496	0	0	0	0	0	0.208889	0	0.21367	0.135486	0.10006	0	0	0	0.280956	0	0	0	0	0	0.193619	0	0.195367	0	0	0.622871	0.232352	0	0	0	0	0
D016116	0	0	0	0	0	0	0	0	0	0	0	0	0	0	0	0	0	0	0	0	0	0	0	0	0.138134	0	0	0	0	0	0	0	0	0	0	0	0	0	0	0	0	0	0	0.218984	0	0	0	0	0
D013610	0	0	0	0	0	0.191075	0.287298	0	0	0	0	0	0	0	0	0	0	0	0	0	0	0	0	0.102815	0.105091	0	0	0.13047	0	0	0	0	0	0	0.121678	0	0	0	0	0	0	0	0.189308	0	0	0	0	0	0
D003875	0	0	0	0	0	0.113634	0	0	0.183263	0	0	0	0	0	0	0	0	0	0	0	0	0	0	0.1022	0.254706	0	0	0	0.113213	0	0	0	0	0	0	0	0	0	0	0	0	0	0	0	0	0	0	0.157065	0
D000382	0	0	0	0	0	0	0	0	0	0	0	0	0	0	0	0	0	0	0	0	0	0	0	0	0	0	0	0	0	0	0	0	0	0	0	0.107551	0	0	0	0	0	0	0	0	0	0	0	0	0
D001005	0	0	0	0	0	0	0	0	0	0	0	0	0	0	0	0	0	0	0	0	0	0	0	0.309215	0	0	0	0	0	0	0	0	0	0	0	0	0	0	0	0	0	0	0	0	0	0	0	0	0
D020151	0	0	0	0	0	0	0	0	0	0	0	0	0	0	0	0	0	0	0	0	0	0	0	0	0	0	0	0	0	0	0	0	0	0	0	0	0	0	0	0	0	0	0	0	0	0	0	0	0
D003877	0	0	0	0	0	0	0	0	0.183731	0	0	0	0	0	0	0	0	0	0	0	0	0	0	0	0	0	0	0	0	0	0	0	0	0	0	0	0	0	0	0	0	0	0	0	0	0	0	0	0
D002561	0	0	0	0.23818	0	0	0	0	0	0.226018	0	0	0	0	0.136088	0	0	0	0	0	0	0	0	0	0	0	0	0	0	0	0	0	0	0	0	0	0	0	0	0	0	0	0	0	0	0	0	0	0
D000749	0	0	0	0	0	0	0	0	0	0	0	0	0	0	0	0	0	0	0	0	0	0	0	0	0.216556	0	0	0	0	0	0	0	0	0	0.190558	0	0	0	0	0.203633	0	0	0	0	0	0	0	0	0
D006967	0	0	0	0	0	0.29677	0	0	0.105566	0.104978	0	0	0	0	0.112658	0	0	0.102125	0	0	0	0	0	0.168525	0.211874	0	0.138548	0.198607	0.742742	0	0	0	0	0	0.110926	0.117933	0.131815	0	0	0	0	0.139447	0	0	0	0	0	0.122456	0
D018761	0	0	0	0	0	0.134215	0	0	0	0	0	0	0	0	0	0	0	0	0	0	0	0	0	0.22382	0.200547	0	0	0	0	0	0	0	0	0	0	0	0	0	0	0	0	0	0	0	0	0	0	0.104859	0
D002609	0	0	0	0	0	0	0	0	0	0	0	0	0	0	0	0	0	0	0	0	0	0	0	0	0	0	0	0	0	0	0	0	0	0	0	0	0	0	0	0	0	0	0	0	0	0	0	0.137835	0
D013959	0	0	0	0	0	0	0	0	0	0	0	0	0	0	0.144024	0	0	0	0	0	0	0	0	0.258874	0.179434	0	0	0	0	0	0	0	0	0	0	0	0	0	0	0	0	0	0	0	0	0	0	0	0
D003872	0	0	0	0	0	0	0	0	0.151161	0	0	0	0	0	0	0	0	0	0	0	0	0	0	0	0.160638	0	0	0	0	0	0	0	0	0	0	0	0	0	0	0	0	0	0	0	0	0	0	0	0
D017034	0	0	0	0.224528	0.566204	0	0	0	0	0	0	0	0	0	0.380628	0	0	0	0	0	0	0	0	0	0	0	0	0	0	0	0	0	0	0	0	0	0	0	0	0	0	0	0	0	0	0	0	0	0
D001416	0	0	0	0	0	0	0	0	0	0	0	0	0	0	0	0	0	0	0	0	0	0	0	0	0	0	0	0	0	0	0	0	0	0	0	0	0	0	0	0	0	0	0	0	0	0	0	0	0
D001281	0	0	0	0	0	0.225047	0.311355	0	0	0	0	0	0	0	0	0	0	0.128247	0	0	0	0	0	0.196835	0.170139	0	0.170571	0.183039	0	0	0	0.271289	0	0	0.146376	0	0	0.135211	0	0	0	0.123321	0.230557	0.524779	0.186101	0	0	0	0
D006831	0	0	0	0	0	0	0	0	0	0	0	0	0	0	0	0	0	0	0	0	0	0	0	0	0	0	0	0	0	0	0	0	0	0	0	0	0	0	0	0	0	0	0	0	0	0	0	0	0
D007960	0	0	0	0	0	0	0	0	0	0	0	0	0	0	0	0	0	0	0	0	0	0	0	0	0	0	0	0	0	0	0	0	0	0	0	0	0	0	0	0	0	0	0	0	0	0	0	0	0
D004820	0	0	0	0	0	0	0	0	0	0	0	0	0	0	0	0	0	0	0	0	0	0	0	0	0.150632	0	0	0	0	0	0	0	0	0.103214	0.132376	0.112393	0	0	0	0	0	0	0	0	0	0	0	0.15808	0
D010201	0	0	0	0	0	0	0	0.24388	0	0	0	0	0	0	0	0	0	0	0	0	0	0	0	0.220829	0.618045	0	0	0	0	0	0	0	0	0.101684	0	0.112475	0	0	0	0	0	0	0	0	0	0	0	0.135454	0
D015140	0	0	0	0.905955	0	0	0	0	0	0	0	0	0	0	0.420835	0	0	0	0	0	0	0	0	0	0	0	0	0	0	0	0	0	0.171068	0	0	0	0	0	0	0	0	0	0	0	0	0	0	0	0
D010661	0	0	0	0	0	0	0	0	0	0	0	0	0	0	0.196157	0	0	0	0	0	0	0	0	0	0	0	0	0	0	0.141841	0	0	0	0	0	0.128928	0	0.159795	0	0	0	0	0	0.244315	0	0	0	0	0
D048909	0	0	0	0	0	0	0	0	0	0	0	0	0	0	0.110555	0	0	0	0	0	0	0	0	0.172782	0	0	0	0	0	0	0	0	0	0	0	0	0	0	0	0.422159	0	0	0	0	0	0	0	0	0
D009497	0	0	0	0	0	0	0	0	0	0	0	0	0	0	0.219108	0	0	0	0	0	0	0	0	0	0	0	0	0	0	0	0	0	0	0	0	0	0	0	0	0	0	0	0	0	0	0	0	0	0
D014456	0	0	0	0	0	0	0	0	0	0	0	0	0	0	0	0	0	0	0	0	0	0	0	0.366837	0.252733	0	0	0	0	0	0	0	0	0	0	0.164647	0	0	0	0	0	0	0	0	0	0	0	0	0
D004410	0	0	0	0	0	0	0	0	0	0	0	0	0	0	0	0	0	0	0	0	0	0	0	0	0	0	0	0	0	0	0	0	0	0	0	0	0	0	0	0	0	0	0	0	0	0	0	0	0
D009389	0	0	0	0	0	0	0	0	0	0	0	0	0	0	0	0	0	0.719438	0	0	0	0	0	0.119874	0.106192	0	0	0.657685	0	0	0	0	0	0	0	0	0	0	0	0	0	0	0.461138	0	0	0	0	0	0
D006929	0	0	0	0	0	0	0	0	0	0	0	0	0	0	0.134565	0	0	0	0	0	0	0	0	0	0	0	0	0	0	0	0	0	0	0	0	0	0	0	0	0	0	0	0	0	0	0	0	0	0
D011656	0	0	0	0	0	0.284573	0	0	0	0	0	0	0	0	0	0	0	0.708784	0	0	0	0	0	0.169552	0.126934	0	0	0.908151	0	0	0	0.15152	0	0	0	0	0	0	0	0	0	0	0	0.117951	0	0	0	0	0
D015160	0	0	0	0	0	0	0	0	0	0	0	0	0	0	0	0	0	0	0	0	0	0	0	0	0	0	0	0	0	0	0	0	0	0	0	0	0	0	0	0	0	0	0	0	0	0	0	0	0
D006261	0	0	0	0	0	0	0	0	0	0.376171	0	0	0	0	0	0	0	0	0	0	0	0	0	0	0.114657	0	0.301432	0	0	0	0	0	0	0	0.211808	0	0	0	0	0	0	0.188083	0	0	0	0	0	0	0
D001259	0	0	0	0	0	0	0	0	0	0	0	0	0	0	0	0	0	0	0.264729	0	0.492305	0	0	0	0	0	0	0	0	0	0	0	0	0	0	0	0	0	0	0	0	0	0	0	0	0	0	0	0
D019446	0	0	0	0	0	0	0	0.240758	0	0	0	0	0	0	0	0	0	0.518066	0	0	0	0	0	0.207112	0.412175	0	0	0.445162	0	0	0	0.14842	0	0	0	0	0	0	0	0	0	0	0	0	0	0	0	0	0
D039141	0	0	0	0	0	0	0	0	0	0	0	0	0	0	0	0.465823	0	0	0	0	0	0	0	0	0	0	0	0	0	0	0	0	0	0	0	0	0	0	0	0	0	0	0	0	0	0	0	0	0
D018276	0	0	0	0	0	0	0	0.155784	0	0	0	0	0	0	0	0	0	0	0	0	0	0	0	0.156703	0.194425	0	0	0	0	0	0	0	0	0	0	0	0	0.113893	0	0	0	0	0	0	0	0	0	0.131366	0
D020194	0	0	0	0	0.271509	0	0	0	0	0	0	0	0	0.954774	0	0	0	0	0	0	0	0	0	0	0	0	0	0	0	0	0	0	0	0	0	0	0	0	0	0	0	0	0	0	0	0	0	0	0
D003111	0	0	0	0	0	0.174406	0	0.273815	0	0	0	0.44599	0	0	0	0	0	0	0	0	0	0	0	0.322963	0.199148	0	0	0	0	0	0	0	0	0	0	0	0	0.184121	0	0	0	0	0	0	0	0	0	0	0
D016778	0	0	0	0	0.103193	0	0	0	0	0	0	0	0	0	0	0	0	0	0	0	0	0	0	0.147631	0.723549	0	0	0	0	0	0	0	0	0	0	0	0	0	0	0	0	0	0	0	0	0	0	0	0
D007706	0	0	0	0	0	0	0	0	0	0	0	0	0	0	0	0	0	0	0	0	0	0	0	0	0	0	0	0	0	0	0	0	0	0	0	0	0	0	0	0	0	0	0	0	0	0	0	0	0
D012595	0	0	0	0	0	0.315042	0	0	0	0.115157	0	0.190943	0	0	0	0.193514	0	0.193219	0	0	0	0	0	0.332253	0.349377	0	0.184935	0.310069	0	0	0	0	0	0	0.249621	0	0.208477	0	0	0.186633	0	0	0	0.138272	0	0	0	0.218246	0
D030361	0	0	0	0	0	0	0	0	0	0	0	0	0	0	0.108518	0	0	0	0	0	0	0	0	0	0.198735	0	0.200255	0	0	0	0	0	0	0	0	0	0	0	0	0	0	0	0	0	0	0	0	0	0
D004714	0	0	0	0	0	0	0	0.113699	0	0.137979	0	0	0	0	0.147422	0	0	0	0	0	0	0	0	0.25794	0	0	0	0	0	0.145765	0	0	0	0	0	0	0	0	0	0	0	0	0	0	0	0	0	0.101812	0
D020215	0	0	0	0	0	0	0	0	0	0	0	0	0	0	0	0	0	0	0	0	0	0	0	0	0	0	0	0	0	0	0	0	0	0	0	0	0	0	0	0	0	0	0	0	0	0	0	0	0
D014565	0	0	0	0	0	0	0	0	0	0	0	0	0	0	0	0	0	0	0	0	0	0	0	0	0	0	0	0	0	0	0	0	0	0	0	0	0	0	0	0	0	0	0	0	0	0	0	0	0
D019636	0	0	0	0.440977	0	0	0	0	0	0	0	0	0	0	0.145613	0	0	0	0	0	0.357	0	0	0	0	0	0	0	0	0	0	0	0.130874	0	0	0	0	0	0	0	0	0	0	0	0	0.14755	0.792093	0	0
D015427	0	0	0	0.106649	0	0	0	0	0	0	0	0	0	0	0	0	0	0.703893	0	0	0	0	0	0	0.127296	0	0	0.630529	0	0	0	0.24428	0	0	0	0	0	0	0	0.115597	0	0	0.572201	0	0	0	0	0	0
D016491	0	0	0	0	0	0	0	0	0	0	0	0	0	0	0	0	0	0	0	0	0	0	0	0	0	0	0	0	0	0	0	0	0	0	0	0	0	0	0	0	0	0	0	0	0	0	0	0	0
D006073	0	0	0	0	0	0	0	0	0	0	0	0	0	0	0.180634	0	0	0	0	0	0	0	0	0.316165	0.201941	0.332575	0.13255	0	0	0	0	0	0	0	0	0.149982	0	0	0	0	0	0	0	0	0	0	0	0	0
D006130	0	0	0	0	0.305336	0	0	0	0	0	0	0	0	0	0.257947	0	0	0	0	0	0	0.637164	0.104981	0.15967	0.136548	0.144384	0	0	0	0.147748	0	0	0.120581	0	0.561162	0.131201	0	0.268668	0	0	0.707854	0	0	0.203793	0	0	0	0.114662	0
D011030	0	0	0	0	0	0	0.1785	0	0	0	0	0	0	0	0	0	0	0.303253	0	0	0	0	0	0.242986	0.161073	0	0.206078	0	0	0	0	0	0	0	0	0	0	0	0	0	0	0	0	0	0	0	0	0	0
D018500	0	0	0	0	0	0	0	0	0	0	0	0	0	0	0.127927	0	0	0	0	0	0	0	0	0	0	0	0	0	0	0	0	0	0	0	0	0	0	0	0	0	0	0	0	0	0	0	0	0	0
D016640	0	0	0	0	0	0	0	0	0	0	0	0	0	0	0	0	0	0	0	0	0	0	0	0	0	0	0	0	0	0	0	0	0	0	0	0	0	0	0	0	0	0	0	0	0	0	0	0	0
D018908	0	0	0	0	0	0	0	0	0	0	0	0	0	0	0	0.174857	0	0	0.100439	0	0	0	0	0	0	0	0	0	0	0	0	0	0	0	0	0.308233	0	0	0	0	0	0	0	0	0	0	0	0	0
D017880	0	0	0	0	0	0	0	0	0	0	0	0	0	0	0.124378	0	0	0.136785	0	0	0	0.502163	0.136927	0	0	0	0.106971	0	0	0	0	0	0	0	0.37253	0	0	0.149891	0	0	0.632862	0	0	0.16125	0.144488	0	0	0	0
D009056	0	0	0	0	0	0	0	0	0	0	0	0	0	0	0	0	0	0	0	0	0	0	0	0	0	0	0	0	0	0.125683	0	0	0	0	0	0	0	0	0	0	0	0	0	0	0	0	0	0	0
D000784	0	0	0	0	0	0.282552	0.296783	0.118264	0	0.127372	0	0.159113	0	0	0	0	0	0	0	0	0	0	0	0.179404	0.183962	0	0	0	0	0	0	0.431471	0	0	0.303624	0.133144	0	0	0	0	0	0	0.232324	0.280579	0.17031	0	0	0	0
D001862	0	0	0	0	0	0.131371	0	0.129273	0	0.156622	0	0	0	0	0.182674	0.276583	0	0.109953	0	0.105274	0	0	0	0.322675	0.256634	0.122965	0.148357	0.10606	0	0	0	0	0	0	0.202009	0.37864	0	0	0	0	0	0.259512	0	0	0	0	0	0.273583	0
D015862	0	0	0	0	0	0	0	0	0	0	0	0	0	0	0.120785	0	0	0	0	0	0	0	0	0	0.117258	0	0.168832	0	0	0	0	0	0	0.829216	0	0	0	0	0	0	0	0	0	0	0	0	0	0	0
D011008	0	0	0	0	0	0.158045	0	0.114961	0.189133	0	0	0	0	0	0	0	0.128909	0	0	0	0	0	0	0	0.316994	0.128411	0	0	0.189974	0	0	0	0	0	0	0	0	0.280604	0	0	0	0	0	0	0	0	0	0	0
D014516	0	0	0	0	0	0.152479	0	0.297183	0	0	0	0	0	0	0	0	0	0	0	0	0	0	0	0	0.177254	0	0	0	0	0	0	0	0	0	0	0.133996	0	0	0	0	0	0	0	0	0	0	0	0.104065	0
D011086	0	0	0	0	0	0	0	0	0	0	0	0	0	0	0	0	0	0.67491	0	0	0	0	0	0	0.101696	0	0.196388	0.654739	0.127306	0	0	0.248012	0	0	0	0	0	0	0	0	0	0	0	0	0.1034	0	0	0	0
D002386	0	0	0	0	0	0	0	0	0.120065	0.253178	0.73616	0	0.748022	0	0	0	0	0	0	0	0	0.351409	0	0	0	0	0	0	0	0	0	0	0	0.423657	0.220551	0	0	0	0	0	0	0	0	0	0	0	0	0.104091	0
D017495	0	0	0	0	0	0	0	0.107043	0.729606	0	0	0	0	0	0	0	0	0	0	0	0	0	0	0	0.129269	0.220884	0	0	0	0	0	0	0	0	0	0	0	0	0	0	0	0	0	0	0	0	0	0	0
D016657	0	0	0	0.363886	0.469857	0	0	0	0	0.147583	0	0	0	0.134838	0.139319	0	0	0.219715	0	0	0	0	0	0	0.11359	0	0	0.183619	0	0	0	0	0	0	0	0.111428	0	0	0	0	0	0	0	0	0	0	0	0	0
D007926	0	0	0	0	0	0	0	0	0	0	0	0	0	0	0.133758	0	0	0	0	0	0	0	0.298883	0	0	0	0	0	0	0	0	0	0	0	0	0	0	0	0	0	0	0	0	0	0	0	0	0	0
D005770	0	0	0	0	0	0	0	0.235398	0	0	0	0	0	0	0	0	0	0	0	0	0	0	0	0.60385	0.360895	0	0	0	0	0	0	0	0	0	0	0	0	0	0	0	0	0	0	0	0	0	0	0	0
D002276	0	0	0	0	0	0	0	0	0	0	0	0	0	0	0	0	0	0	0	0	0	0	0	0	0	0	0.214945	0	0	0	0	0	0	0	0	0	0	0	0	0	0	0	0	0	0	0	0	0	0
D019337	0	0	0	0	0	0	0	0	0	0	0	0	0	0	0	0	0	0	0	0	0	0	0	0.266983	0.79508	0	0	0	0	0	0	0	0	0	0	0	0	0	0	0	0	0	0	0	0	0	0	0	0
D011218	0	0	0	0	0	0.147546	0	0	0	0	0	0	0	0	0.219714	0	0	0	0	0	0	0	0.289901	0.253378	0	0	0	0	0	0	0	0	0	0	0	0	0	0.30082	0	0	0.387215	0	0	0	0	0	0	0.122962	0
D020345	0	0	0	0	0	0	0	0	0	0	0	0	0	0	0	0	0	0	0	0	0	0	0	0	0.155202	0	0	0.389948	0	0	0	0.150988	0	0	0	0	0	0	0	0	0	0	0	0	0	0	0	0	0
D010554	0	0	0	0.140955	0	0	0	0	0	0	0	0	0	0	0.299285	0	0	0	0	0	0	0	0	0	0	0	0	0	0	0	0	0	0	0	0	0	0	0	0	0	0	0	0	0	0	0	0	0	0
D011087	0	0	0	0	0	0.104706	0	0	0	0.112206	0	0	0	0	0	0	0	0.205789	0	0	0	0	0	0	0.194751	0	0	0.207075	0	0	0	0.133049	0	0	0	0	0	0	0	0	0	0	0	0	0	0	0	0.167776	0.148929
D014849	0	0	0	0	0	0	0	0	0	0	0	0	0	0	0	0	0	0	0	0	0	0.581338	0	0	0	0	0	0	0	0	0	0	0	0	0.143336	0	0	0	0	0	0	0	0	0	0	0	0	0	0
D002340	0	0	0	0	0	0.116475	0.143338	0	0	0.466319	0.195735	0	0	0	0	0	0	0.107828	0.207933	0	0	0.145354	0	0.110175	0.137934	0	0.340523	0	0	0	0	0.112497	0	0.286369	0.196376	0.163715	0	0.110146	0	0.174971	0	0.183864	0.191752	0.175021	0	0	0	0	0
D002543	0	0	0	0.230429	0.207498	0	0	0	0	0.299994	0	0	0	0	0.166747	0	0	0.138187	0	0	0.113604	0.125711	0	0	0.20398	0	0	0.109736	0	0	0	0	0	0	0.169027	0.167424	0	0	0	0	0	0	0	0	0	0	0	0	0
D006223	0	0	0	0	0	0	0	0	0	0	0	0	0	0	0	0	0	0	0	0	0	0	0	0	0	0	0	0	0	0	0	0	0	0	0	0	0	0	0	0	0	0	0	0	0	0	0	0	0
D019189	0	0	0	0.232235	0	0	0	0	0	0	0	0	0	0	0	0	0	0	0	0	0	0	0	0	0	0	0	0	0	0	0	0	0	0	0	0	0	0	0	0	0	0	0	0	0	0	0	0	0
D005901	0	0	0	0	0	0	0	0	0	0.584584	0.442171	0	0.262149	0	0	0	0	0	0	0	0	0.285898	0	0	0	0	0	0	0	0	0	0	0	0.822954	0	0	0	0	0	0	0	0	0	0	0	0.178069	0	0	0
D017379	0	0	0	0	0	0	0	0	0	0	0	0	0	0	0.108838	0	0	0.113013	0	0	0	0	0	0.219948	0	0.23423	0	0.114018	0	0	0	0	0	0	0	0	0	0	0	0.759457	0	0	0.24893	0.19308	0	0	0	0	0
D007951	0	0.16857	0	0	0	0.272474	0	0.225644	0.116543	0.121498	0	0.253153	0	0	0	0	0	0.135136	0	0	0	0	0	0.289111	0.834767	0	0.176673	0.12025	0.26021	0	0	0	0	0	0.203372	0.140857	0.235446	0.536397	0	0	0	0.102251	0	0	0	0.137837	0	0.215085	0
D004211	0	0	0	0	0	0	0	0	0	0	0	0	0	0	0	0	0	0.123256	0	0	0	0	0	0	0	0	0	0	0	0	0	0	0	0	0	0	0	0	0	0	0	0	0	0	0	0	0	0	0
D003389	0	0	0	0	0	0	0	0	0	0	0	0	0	0	0	0.104435	0	0	0	0	0	0	0	0	0.183745	0	0	0	0	0	0	0	0	0	0	0.269422	0	0	0	0	0	0	0	0	0	0	0	0	0
D014313	0	0	0	0	0	0	0	0	0	0	0	0	0	0	0	0	0	0	0	0	0	0	0	0	0	0	0	0	0	0	0	0	0	0	0	0	0	0	0	0	0	0	0	0	0	0	0	0	0
D004535	0	0.114462	0	0	0.108665	0.217975	0.125741	0	0	0.145285	0	0	0	0	0.141604	0.122416	0.158257	0	0.110737	0	0	0.211133	0.373501	0.157892	0.254664	0	0	0	0	0	0	0	0	0	0.496439	0.390656	0	0.232578	0	0	0	0.218743	0	0.148372	0	0	0	0.169285	0
D003635	0	0	0	0	0	0	0	0	0	0	0	0	0	0	0.175487	0	0	0	0	0.238496	0	0.792883	0	0	0.106272	0.209576	0	0	0	0.161346	0	0	0	0	0	0.124181	0	0	0	0	0	0	0	0	0	0	0	0	0
D022124	0	0	0	0	0.282469	0	0	0	0	0	0	0	0	0	0.16477	0	0	0	0	0	0	0	0	0	0.135082	0	0	0	0	0	0	0	0	0	0	0	0	0	0	0	0	0	0	0	0	0	0	0	0
D005313	0	0	0	0	0	0	0	0	0	0	0	0	0	0	0	0	0	0	0	0	0	0	0	0	0.111413	0	0	0	0	0	0	0	0	0	0	0	0	0	0	0	0	0	0	0	0	0	0	0	0
D017496	0	0	0	0	0	0	0	0	0	0	0	0	0	0	0.126045	0.111781	0	0	0	0	0	0.688897	0.280581	0	0	0	0	0	0	0	0	0	0	0	0.516547	0.189294	0	0	0	0	0	0	0	0	0	0	0	0	0
D005264	0	0	0	0	0	0.170049	0	0	0	0	0	0	0	0	0.103071	0.149088	0	0.243844	0	0	0	0	0	0.230312	0.333872	0	0	0	0	0	0	0	0	0	0.151034	0	0	0	0	0	0	0	0	0	0	0	0	0	0
D012512	0	0	0	0	0	0.402737	0	0.207665	0	0.139524	0	0	0	0	0	0	0	0.103308	0	0	0	0	0	0.190274	0.314114	0	0.451667	0.151722	0	0	0	0	0	0	0.25981	0.283286	0	0.149403	0	0	0	0	0	0	0	0	0	0.180281	0
D000795	0	0	0	0	0	0	0	0	0	0	0	0	0	0	0	0	0	0	0	0	0	0	0	0	0.233314	0	0.171668	0	0	0	0	0	0	0	0	0	0	0	0	0	0	0	0	0	0	0	0	0	0
D013262	0	0	0	0	0	0.191572	0	0.115064	0	0.204888	0.142632	0	0	0	0	0	0	0	0	0	0	0.110373	0	0.108384	0.436321	0	0	0	0.315959	0	0	0	0	0.198685	0.173363	0	0	0.329304	0	0	0	0	0	0	0	0.274936	0	0.116003	0
D046350	0	0	0	0	0	0	0	0.178945	0	0	0	0	0	0	0	0	0	0	0	0	0	0	0	0.117289	0	0	0	0	0	0	0	0	0	0	0	0	0	0	0	0	0	0	0	0	0	0	0	0	0
D001049	0	0	0	0	0	0	0	0	0	0	0	0	0	0	0	0	0	0	0	0	0	0	0	0	0	0	0	0	0	0	0	0	0	0	0	0	0	0	0	0	0	0	0	0	0	0	0	0	0
D007822	0	0	0	0	0	0	0	0	0	0	0	0	0	0	0	0	0	0	0	0	0	0	0	0.142894	0	0	0	0	0	0	0	0	0	0	0	0	0	0	0	0	0	0	0	0	0	0	0	0	0
D001816	0	0	0	0	0	0	0	0	0	0	0	0	0	0	0	0	0	0	0	0	0	0	0	0	0	0	0	0	0	0	0	0	0	0	0	0	0	0	0	0	0	0	0	0	0	0	0	0	0
D010547	0	0	0	0	0	0	0	0	0	0	0	0	0	0	0	0	0	0	0	0	0	0	0	0	0	0	0	0	0	0	0	0	0	0	0	0	0	0	0	0	0	0	0	0	0	0	0	0	0
D003057	0	0	0	0	0	0	0	0	0	0	0	0	0	0	0	0	0	0	0	0	0	0	0	0	0	0	0	0	0	0	0	0	0	0	0	0	0	0	0	0	0	0	0	0	0	0	0	0	0
D002349	0	0	0	0	0	0	0	0	0	0	0	0	0	0	0	0.263362	0	0	0	0	0	0	0	0	0.103803	0	0	0	0	0	0	0	0	0	0	0.338949	0	0	0	0	0	0	0	0	0	0	0	0	0
D014950	0	0	0	0	0	0.277104	0	0	0	0	0	0	0	0	0	0	0	0	0	0	0	0	0	0.194782	0	0	0	0	0	0	0	0	0	0.106522	0.201697	0	0	0	0	0	0	0	0	0	0	0	0	0	0
D003528	0	0	0	0	0	0.316819	0	0	0	0	0	0	0	0	0	0	0	0	0.115902	0	0	0.146253	0	0.122991	0.202851	0	0.297962	0.182597	0	0	0	0	0	0	0	0	0	0	0	0	0	0	0	0	0	0	0	0	0
D019871	0	0	0	0	0	0	0	0	0	0	0	0	0	0	0	0	0	0	0	0	0	0	0	0	0	0	0	0	0	0	0	0	0	0	0.355333	0	0	0	0	0	0.40373	0	0	0.141766	0	0	0	0	0
D012872	0	0	0	0	0	0	0	0	0	0	0	0	0	0	0	0	0	0	0	0	0	0	0	0	0	0	0	0	0	0	0	0	0	0	0	0	0	0	0	0	0	0	0	0	0	0	0	0	0
D007040	0	0	0	0	0	0	0	0	0	0	0	0	0	0	0	0	0	0	0	0	0	0	0	0	0	0	0	0.172929	0	0	0	0	0	0	0	0	0	0	0	0	0	0	0	0	0	0	0	0	0
D007511	0	0	0	0	0	0.109365	0	0	0	0	0	0	0	0	0	0	0	0.304976	0	0	0	0	0	0	0.142261	0	0.222578	0.272441	0	0	0	0.14098	0	0	0	0.154742	0	0	0	0	0	0	0.823753	0	0	0	0	0	0
D013585	0	0.163563	0	0	0	0	0	0	0.228059	0	0	0	0	0	0	0	0	0	0	0	0	0	0	0	0	0	0	0	0	0	0	0	0	0	0	0.17677	0	0	0	0	0	0.112931	0	0	0	0	0	0	0
D024801	0	0	0	0.294723	0	0	0	0	0	0	0	0	0	0	0	0	0	0	0	0	0.281922	0	0	0	0	0	0	0	0	0	0	0	0	0	0	0	0	0	0	0	0	0	0	0	0	0	0.821935	0	0
D013118	0	0	0	0	0	0	0	0	0	0	0	0	0	0	0	0.53422	0	0	0	0	0	0	0	0	0.216959	0	0	0	0	0	0	0	0	0	0.199654	0	0	0	0	0	0	0	0	0	0	0	0	0	0
D013896	0	0	0	0	0	0.272257	0.177972	0	0	0	0	0	0	0	0	0	0	0.149833	0	0	0	0	0	0.164337	0.11701	0	0	0	0.126059	0	0	0	0	0	0	0.210643	0	0	0	0	0	0	0	0	0	0	0	0	0
D019575	0	0	0	0	0	0	0	0	0	0	0	0	0	0	0	0	0	0	0	0	0	0	0	0	0	0	0	0	0	0	0	0	0	0	0	0	0	0	0	0	0	0	0	0	0	0	0	0	0
D007619	0	0	0	0	0	0	0	0	0	0	0	0	0	0	0	0	0	0	0	0	0	0	0	0	0	0	0	0	0	0	0	0	0	0	0	0	0	0	0	0	0	0	0	0	0	0	0	0	0
D003586	0	0	0.106992	0	0.103503	0.221007	0	0.2798	0	0	0.170217	0.207499	0	0	0	0	0	0	0	0	0	0.404763	0	0.14692	0.454521	0	0	0	0.276097	0	0	0	0	0	0.230226	0.108289	0.313945	0	0	0	0	0	0	0.107982	0.102811	0	0	0.104563	0
D015325	0	0	0	0	0	0	0	0	0	0	0	0	0	0	0.126468	0.246366	0	0	0	0	0	0	0.246512	0	0	0	0	0	0	0	0	0	0	0	0	0.359172	0	0.106816	0	0	0	0.165811	0	0	0	0	0	0	0
D017445	0	0	0	0	0	0	0	0	0.390757	0	0	0	0	0	0	0	0.162687	0	0	0	0	0	0	0	0.123099	0	0	0	0	0	0	0	0	0	0	0	0	0	0	0	0	0	0	0	0	0	0	0	0
D009437	0	0	0	0	0	0	0	0	0	0	0	0	0	0	0	0	0	0	0	0	0	0	0	0	0	0	0	0	0	0	0	0	0	0	0	0	0	0	0	0	0	0	0	0	0	0	0	0	0
D009364	0	0	0.180205	0	0	0.342598	0	0.257319	0	0.180518	0	0.230891	0	0	0	0	0.114144	0	0	0	0	0	0	0.475412	0.559682	0	0.228015	0.103629	0.222749	0	0	0	0	0	0.107025	0.156105	0.178767	0.222014	0	0	0	0.128329	0.149527	0	0	0	0	0.136602	0
D006816	0	0	0	0.357869	0	0	0	0	0	0	0	0	0	0.146325	0.226655	0	0	0	0	0	0.218031	0	0	0	0	0	0	0	0	0	0	0	0.451882	0	0	0.125458	0	0	0	0	0	0	0	0	0	0	0	0	0
D005354	0	0	0	0	0	0.131622	0	0	0	0.10641	0	0	0	0	0	0	0	0	0	0	0	0	0	0.282459	0.224694	0	0	0.454711	0	0	0	0	0	0	0.109904	0.198264	0	0	0	0	0	0	0	0	0	0	0	0	0
D015352	0	0	0	0	0	0	0	0	0	0	0	0	0.107139	0	0	0	0	0	0	0	0	0	0	0	0	0	0	0	0	0	0	0	0	0	0	0	0	0	0	0	0	0	0	0	0	0	0	0	0
D020370	0	0	0	0	0	0	0	0	0	0	0	0	0	0	0	0	0	0	0	0	0	0	0	0.199581	0	0	0	0	0	0	0	0	0	0	0	0.274453	0	0	0	0	0	0	0	0	0	0	0	0	0
D018980	0	0	0	0.345235	0	0	0	0	0	0	0	0	0	0	0.210409	0	0	0	0	0	0	0	0	0	0	0	0	0	0	0	0	0	0	0	0.360613	0	0	0	0	0	0	0	0	0.133763	0	0	0	0	0
D006474	0	0	0	0	0	0	0	0	0	0	0	0	0	0	0	0	0	0	0	0	0	0	0	0	0.286204	0	0	0	0	0	0	0	0	0	0.101261	0	0	0	0	0	0	0	0	0	0	0	0	0	0.540993
D012218	0	0	0	0	0	0	0	0	0	0	0	0	0	0	0	0	0	0	0	0	0	0	0	0	0	0	0	0	0	0	0	0	0	0	0	0	0	0	0	0	0	0	0	0	0	0	0	0	0
D007713	0	0	0	0	0	0	0	0	0	0	0	0	0	0	0.275937	0	0	0	0	0	0	0.722874	0	0	0	0.149557	0	0	0	0.162424	0	0	0.174493	0	0.660133	0.148641	0	0	0	0	0	0	0	0.235857	0.11271	0	0	0	0
D008275	0	0	0	0	0.364992	0	0	0	0.104831	0	0	0	0	0	0	0	0	0	0	0	0	0	0	0	0	0	0	0	0	0	0	0	0	0	0	0	0	0	0	0	0	0	0	0	0	0	0	0	0
D052177	0	0	0	0	0.230576	0	0	0.258447	0	0	0	0	0	0	0.104812	0	0	0	0	0	0	0.27709	0.159551	0.103545	0.249252	0	0	0	0	0	0	0	0	0	0	0.202331	0	0	0	0	0	0	0	0	0	0	0	0.213407	0
D013036	0	0	0	0	0.7306	0.101375	0	0	0	0	0	0	0	0.2898	0.197215	0	0	0	0.250059	0	0	0	0.191195	0	0	0	0	0	0	0	0	0	0	0	0	0.178669	0	0	0	0	0	0	0	0.189016	0	0	0	0.104606	0
D001796	0	0	0	0	0	0	0	0	0.142639	0	0	0	0	0	0	0	0	0	0	0	0	0	0	0	0.222225	0	0	0	0	0	0	0	0	0	0.120358	0	0.155518	0	0	0.199086	0	0	0	0	0	0	0	0.129877	0
D002534	0	0	0	0.170806	0	0	0	0	0	0	0	0	0	0.328058	0.123139	0	0	0	0	0	0	0	0	0	0.106974	0	0	0	0	0	0	0	0	0	0	0	0	0	0	0	0	0	0	0	0	0	0	0	0
D005357	0	0	0	0	0	0	0	0	0	0.422462	0	0	0	0	0	0	0	0	0	0	0	0	0	0	0.131459	0	0	0	0	0	0	0	0	0	0	0.144988	0	0.100517	0	0	0	0	0	0	0	0	0	0	0
D000347	0	0	0	0	0	0	0	0	0	0	0	0	0	0	0	0	0	0	0	0	0	0	0	0	0.369116	0	0	0	0	0	0	0	0	0	0	0.10242	0	0	0	0	0	0	0	0	0	0	0	0	0.483743
D011038	0	0	0	0	0	0	0	0	0	0	0	0	0	0	0	0	0	0	0	0	0	0	0	0	0	0	0	0	0	0	0	0	0	0	0	0	0	0	0	0	0	0	0	0	0	0	0	0	0
D005600	0	0	0	0	0	0	0	0	0	0	0	0	0	0	0.20378	0	0	0	0	0	0	0	0	0	0	0	0	0	0	0.115571	0	0	0	0	0	0.112914	0	0	0	0	0	0	0	0	0	0	0	0	0
D005076	0	0	0	0	0	0.232792	0	0.12551	0.12696	0	0	0.143757	0	0	0	0	0	0	0	0	0	0	0	0.128986	0.517826	0	0	0	0.244893	0	0	0	0	0	0	0.105134	0.108339	0.475301	0	0	0	0	0	0	0	0	0	0.143096	0
D006943	0	0	0	0	0.101111	0	0	0.118224	0	0.16098	0	0	0	0	0.209564	0	0	0	0	0	0	0	0	0.288504	0.14952	0.313729	0	0.135787	0	0	0	0	0	0	0	0	0	0	0	0.198308	0	0	0	0	0	0	0	0.137007	0
D029503	0	0	0	0	0	0	0	0	0	0	0	0	0	0	0	0	0	0	0	0	0	0	0	0	0	0	0	0	0	0	0	0	0	0	0	0	0	0	0	0	0	0	0	0	0	0	0	0	0
D009397	0	0	0	0	0	0	0	0	0	0	0	0	0	0	0	0	0	0	0	0	0	0	0	0	0	0	0	0	0	0	0	0	0	0	0	0	0	0	0	0	0	0	0	0	0	0	0	0	0
D003327	0	0	0	0	0	0.103386	0.164864	0	0	0	0	0	0	0	0	0	0	0	0	0	0	0	0	0	0	0	0.123806	0	0	0	0	0.764542	0	0	0	0	0	0	0	0	0	0.107498	0	0.609224	0.112701	0	0	0	0
D013971	0	0	0	0	0	0	0	0	0	0	0	0	0	0	0.115032	0	0	0	0	0	0	0	0.222651	0	0.248634	0	0	0	0	0	0	0	0	0	0	0	0	0	0	0	0	0	0	0	0	0	0	0	0
D010523	0	0	0	0	0	0	0	0	0	0	0	0	0	0	0	0.283768	0	0	0.11862	0	0.339052	0	0	0	0.109857	0	0.123023	0	0	0	0	0	0	0	0.102486	0.434513	0	0	0	0	0	0.291942	0	0	0	0	0	0	0
D009381	0	0.201108	0	0	0.244511	0.108747	0	0.151976	0	0.163829	0	0.109571	0	0	0.132776	0	0	0.11092	0	0	0	0	0	0.207309	0.170651	0.524445	0	0.115258	0	0.11762	0	0	0	0	0.17762	0.19289	0	0.232493	0	0	0.106485	0.237703	0.176922	0	0	0	0	0.162231	0
D034721	0	0	0	0	0	0	0	0	0	0	0	0	0	0	0	0	0.101656	0	0	0	0	0	0	0.265459	0.139262	0	0	0	0	0	0	0	0	0	0	0	0	0	0	0	0	0	0	0.119306	0	0	0	0	0
D017096	0	0	0	0.230315	0	0	0	0	0	0	0	0	0	0.243701	0.377324	0	0	0	0	0	0	0	0	0	0	0	0	0	0	0	0	0	0	0	0.114657	0	0	0	0	0	0	0	0	0	0	0	0	0	0
D053579	0	0	0	0	0	0	0	0	0	0	0	0	0	0	0	0	0	0	0	0	0	0	0	0	0.102199	0	0	0	0	0	0	0	0	0	0	0	0	0	0	0	0	0	0	0	0	0	0	0	0
D007714	0	0	0	0	0	0	0	0	0	0	0	0	0	0	0	0.105402	0	0	0	0	0	0.516161	0	0	0	0	0	0	0	0	0	0	0	0	0	0	0	0	0	0	0	0	0	0	0	0	0	0	0
D009468	0	0	0	0	0	0	0	0	0	0	0	0	0	0	0	0.876631	0	0	0.188908	0	0.318691	0	0.247033	0	0.105969	0	0	0	0	0	0	0	0	0	0	0.85663	0	0.154297	0	0	0	0	0	0	0	0	0	0	0
D018813	0	0	0	0	0	0	0	0	0	0	0	0	0	0	0	0	0	0	0	0	0	0	0	0	0	0	0	0	0	0	0	0	0	0	0	0	0	0	0	0	0	0	0	0	0	0	0	0	0
D007877	0	0	0	0.115115	0	0	0	0	0	0	0	0	0	0	0.14848	0	0	0	0	0	0	0	0	0	0.484614	0	0	0	0	0	0	0	0	0	0	0	0	0	0	0	0	0	0	0	0	0	0	0	0
D000309	0	0	0	0	0	0	0	0	0	0	0	0	0	0	0.204817	0.139656	0	0	0	0	0	0.209131	0.156224	0.269141	0.383955	0.223638	0	0.118231	0	0	0	0	0	0	0.272336	0	0	0	0	0	0	0	0	0	0	0	0	0.24944	0
D003117	0	0	0	0	0	0	0	0	0	0	0	0	0	0	0.133651	0	0	0	0	0	0	0	0	0	0	0	0	0	0	0	0	0	0	0.255419	0	0	0	0	0	0	0	0	0	0	0	0	0	0	0
D018249	0	0	0	0	0	0	0	0	0	0	0	0	0	0	0	0	0	0	0	0	0	0	0	0	0.153424	0.225091	0.260989	0	0	0.389761	0	0	0	0	0	0	0	0	0	0	0	0	0	0	0	0	0	0	0
D014898	0	0	0	0	0	0	0	0	0	0	0	0	0	0	0	0	0	0	0	0	0	0	0	0	0	0	0	0	0	0	0	0	0	0	0	0	0	0	0	0	0	0	0	0	0	0	0	0	0
D001145	0	0	0	0	0	0.155673	0.297175	0	0	0	0	0	0	0	0	0	0	0.151622	0	0	0	0	0	0	0	0	0.132138	0.160679	0	0	0	0.382274	0	0	0.114575	0	0	0	0	0	0	0	0	0.669971	0.109134	0	0	0	0
D020754	0	0	0	0.120406	0	0	0	0	0	0.105059	0	0	0	0.163042	0.152006	0.127033	0	0	0.455566	0.166059	0.537062	0.157047	0	0	0	0	0.10376	0	0	0	0	0	0.350053	0.155843	0.12913	0.135591	0	0	0	0	0	0	0	0	0	0	0.368619	0	0
D007105	0	0	0	0	0	0	0	0	0	0	0	0	0	0	0	0	0	0	0	0	0	0	0	0	0.165901	0	0	0	0	0	0	0	0	0	0	0	0	0	0	0.323552	0	0	0	0	0	0	0	0.117312	0
D005148	0	0	0	0	0	0	0	0	0	0	0	0	0	0	0	0	0	0	0	0	0	0	0	0.13352	0.188816	0.292351	0.1523	0	0	0	0	0	0	0	0	0.106847	0	0	0	0	0	0	0	0	0	0	0	0	0
D015209	0	0	0	0	0	0	0	0.703813	0	0	0	0	0	0	0	0	0	0	0	0	0	0	0	0	0.240003	0	0	0	0	0	0	0	0	0	0	0	0	0	0	0	0	0	0	0	0	0	0	0	0
D017029	0	0	0	0.244808	0	0	0	0	0	0	0	0	0	0	0	0	0	0	0	0	0	0	0	0	0.130202	0	0	0	0	0	0	0	0	0	0	0	0	0	0	0	0	0	0	0	0	0	0	0	0
D009542	0	0	0	0.113855	0	0.113004	0	0	0	0.223826	0	0	0	0	0.164983	0	0	0	0	0	0.358172	0.284511	0	0	0.107672	0	0	0	0	0	0	0	0.18088	0	0.369618	0.218426	0	0.179341	0	0	0.351277	0	0	0.111222	0	0	0.626425	0	0
D014402	0	0	0	0	0.795839	0	0	0	0.197471	0	0	0	0	0	0.186082	0	0	0	0	0	0	0	0	0	0	0	0	0	0	0.10565	0	0	0	0	0.62933	0.14551	0	0.15957	0	0	0	0	0	0.219904	0	0	0	0	0
D003929	0	0	0	0	0	0	0	0	0	0	0	0	0	0	0	0	0	0	0	0	0	0	0	0.16604	0.119301	0	0	0	0	0	0	0	0	0	0	0	0	0	0	0	0	0	0	0	0	0	0	0	0
D017545	0	0.248297	0	0	0	0.391941	0.24405	0	0	0	0	0	0	0	0	0	0.200527	0.105094	0	0	0	0	0	0.307246	0.181353	0	0.366533	0.154138	0	0	0	0.195738	0	0	0.219334	0	0	0	0	0	0	0	0	0.176544	0	0	0	0	0
D000052	0	0	0	0	0	0	0	0.114832	0	0.125014	0	0	0	0	0.119305	0	0	0	0	0	0	0	0	0.197065	0	0.846727	0	0	0	0.235559	0	0	0	0	0	0	0	0	0	0	0	0	0	0	0	0	0	0.11813	0
D004062	0	0	0	0.248443	0	0	0	0	0	0	0	0	0	0	0.191617	0	0	0	0	0	0	0.379434	0	0	0	0	0	0	0	0	0	0	0	0	0.386266	0	0.155227	0	0	0	0	0	0	0	0	0	0	0.208048	0
D012163	0	0	0	0	0	0	0	0	0	0	0.814057	0	0	0	0	0	0	0	0	0	0	0.237795	0	0	0	0	0	0	0	0	0	0	0	0.513303	0.108585	0	0	0	0	0	0	0	0	0	0	0	0	0	0
D010181	0	0	0	0	0	0	0	0	0	0	0	0	0	0	0	0	0	0	0	0	0	0	0	0	0	0	0	0	0	0	0	0	0	0	0	0	0	0	0	0	0	0	0	0	0	0	0	0	0
D006312	0	0	0	0	0	0	0	0	0	0	0	0	0	0	0	0	0	0	0	0	0	0	0	0	0	0	0	0	0	0	0	0	0	0	0	0	0	0	0	0	0	0	0	0	0	0	0	0	0
D008232	0	0	0	0	0	0	0	0	0	0	0	0	0	0	0	0	0	0	0	0	0	0	0	0	0.244803	0	0	0	0	0	0	0	0	0	0	0	0.614428	0.280747	0	0	0	0	0	0	0	0	0	0.108991	0
D009303	0	0	0	0.141496	0	0.204179	0	0	0	0.264984	0	0	0	0	0	0	0	0.104843	0.221207	0	0	0.212112	0	0.142777	0.213709	0	0	0.110207	0.155235	0	0	0	0	0.135124	0.173386	0.162484	0	0.11476	0	0	0	0.152208	0	0	0	0	0	0	0
D009845	0	0	0	0	0	0	0	0	0	0.140276	0	0	0	0	0.137064	0	0	0	0	0	0	0	0	0.241373	0.273903	0	0	0	0	0.286814	0	0	0	0	0	0.185759	0	0	0	0	0	0	0	0	0	0	0	0	0
D006211	0	0	0	0	0	0	0	0	0	0	0	0	0	0	0	0	0	0	0	0	0	0	0	0	0	0	0	0	0	0	0	0	0	0	0	0	0	0	0	0	0	0	0	0	0	0	0	0	0
D006210	0	0	0	0	0	0	0	0	0	0	0	0	0	0	0	0	0	0	0	0	0	0	0	0	0	0	0	0	0	0	0	0	0	0	0	0	0	0	0	0	0	0	0	0.230066	0	0	0	0	0
D003231	0	0	0	0	0	0.253382	0	0	0	0	0.326511	0	0	0	0	0	0	0	0	0	0	0.227934	0	0.123226	0.416059	0	0	0	0	0	0	0	0	0.319553	0.260836	0	0	0	0	0	0	0	0	0	0	0	0	0	0
D020388	0	0	0	0.108891	0	0.129066	0	0	0	0	0	0	0	0	0.167937	0.282577	0	0.245229	0	0	0	0	0	0.163422	0.11511	0	0	0.250308	0.236309	0	0	0	0	0	0.223198	0.387701	0	0	0	0	0	0.272192	0	0	0	0	0	0.106112	0
D011504	0	0	0	0	0	0	0	0	0	0	0	0	0	0	0	0	0	0	0	0	0	0	0	0.110472	0.15772	0	0	0	0	0	0	0	0	0	0	0	0	0	0	0	0	0	0	0	0	0	0	0	0
D002289	0	0	0	0	0	0.232902	0	0.181009	0	0	0	0.241173	0	0	0	0	0.139676	0.13496	0	0	0	0	0	0.560341	0.576274	0	0.116595	0.225664	0.262063	0	0	0	0	0	0	0.129506	0.220751	0.244007	0	0	0	0	0.112101	0	0	0	0	0.154624	0
D006973	0	0	0	0	0	0.106624	0	0	0	0.147515	0	0	0	0	0.164655	0	0	0.109241	0	0	0	0	0	0.260877	0.14028	0.280035	0	0.101163	0	0	0	0.149817	0	0	0	0	0	0.222352	0	0.714844	0	0	0.229385	0.161291	0	0	0	0.137796	0
D002538	0	0	0	0.234117	0	0	0	0	0	0.464978	0	0	0	0	0.152957	0	0	0	0	0	0	0	0	0	0.17361	0	0	0	0	0	0	0	0	0.12412	0.182926	0	0	0	0	0	0	0	0	0	0	0	0	0	0
D008224	0	0	0	0	0.10224	0.316685	0	0.223268	0	0	0	0	0	0	0	0	0	0	0	0	0	0	0	0.172764	0.442526	0	0	0	0	0	0	0	0	0	0.147349	0.124638	0	0	0	0	0	0	0	0.113952	0	0	0	0	0
D010026	0	0	0	0	0	0	0	0	0	0	0	0	0	0	0	0	0	0	0	0	0	0	0.126611	0	0.126463	0	0	0	0	0	0	0	0	0	0.326273	0	0	0	0	0	0	0	0	0	0	0	0	0	0
D004480	0	0	0	0	0	0	0	0	0	0	0	0	0	0	0.102854	0	0	0	0	0	0	0	0	0	0.144534	0	0	0	0	0	0	0	0	0	0	0.114454	0	0	0	0	0	0	0	0	0	0	0	0	0
D018307	0	0	0	0.230998	0	0	0	0	0	0	0	0	0	0	0	0	0	0	0	0	0	0	0	0.192843	0.253511	0	0	0	0	0	0	0	0	0	0	0	0	0	0	0	0	0	0	0	0	0	0	0	0
D013132	0	0	0	0.131587	0	0	0	0	0	0	0	0	0	0.227	0.151554	0.132285	0	0	0	0	0.578908	0	0.103726	0	0	0	0	0	0	0	0	0	0	0	0	0.165895	0	0	0	0	0	0	0	0	0	0	0	0	0
D006561	0	0	0	0.30507	0	0	0	0	0	0	0	0	0	0	0	0	0	0	0	0	0	0	0	0	0.347687	0	0	0	0	0	0	0	0	0	0	0	0	0	0	0	0	0	0	0	0	0	0	0	0
D003323	0	0	0	0	0	0	0.299185	0	0	0	0	0	0	0	0	0	0	0	0	0	0	0	0	0	0	0	0	0	0	0	0	0	0	0	0	0	0	0	0	0	0	0	0	0.518714	0	0	0	0	0
D004381	0	0	0	0	0	0	0	0.141753	0	0	0	0	0	0	0	0	0	0	0	0	0	0	0	0.386191	0	0	0	0	0	0	0	0	0	0	0	0	0	0	0	0	0	0	0	0	0	0	0	0	0
D015776	0	0	0	0	0	0	0	0	0	0	0	0	0	0	0	0	0	0	0	0	0	0	0	0	0	0	0	0	0	0	0	0	0	0	0	0	0	0	0	0	0	0	0	0	0	0	0	0	0
D000745	0	0	0	0	0	0	0	0	0	0	0	0	0	0	0	0	0	0	0	0	0	0	0	0	0	0	0	0	0	0	0	0	0	0	0	0	0.265704	0	0	0	0	0	0	0	0	0	0	0	0
D015452	0	0	0	0	0	0.108894	0	0.264469	0	0.141623	0	0	0	0	0	0	0	0	0	0	0	0.115464	0	0.175173	0.330955	0	0	0	0	0	0	0	0	0	0.127798	0.190008	0	0	0	0	0	0	0	0	0	0	0	0	0
D002051	0	0.406827	0	0	0	0.304196	0	0.362704	0	0.204761	0	0.294574	0	0	0	0	0	0	0	0	0	0	0	0.151224	0.414629	0	0.237621	0	0.10259	0	0	0	0	0	0.168323	0.229191	0.124237	0.207324	0	0	0	0.128446	0.127435	0	0	0	0	0.210016	0
D011085	0	0	0	0	0	0	0	0.111452	0	0.106851	0	0	0	0	0	0	0	0	0	0	0	0	0	0.163235	0	0	0	0	0	0.191984	0	0	0	0	0	0	0	0	0	0	0	0	0	0	0	0	0	0	0
D003616	0	0	0	0	0	0	0	0	0	0	0	0	0	0	0.154083	0	0	0	0	0	0	0	0.281544	0	0	0	0	0	0	0	0	0	0	0	0.504758	0	0	0	0	0	0	0	0	0	0	0	0	0	0
D010195	0	0	0	0	0	0.441414	0	0.616283	0.11135	0	0	0	0	0	0	0	0	0.103354	0	0	0	0	0	0.233677	0.267679	0	0	0	0	0	0	0	0	0	0	0.177281	0	0	0	0	0	0	0	0	0	0	0	0	0
D004204	0	0	0	0	0	0	0	0	0	0	0	0	0	0	0	0	0	0	0	0	0	0	0	0	0.111011	0	0.140608	0	0	0	0	0	0	0	0	0.223207	0	0	0	0	0	0	0	0	0	0	0	0	0
D017588	0	0	0	0	0	0	0	0	0	0	0	0	0	0	0	0	0	0	0	0	0	0	0	0	0	0	0	0	0	0.278916	0	0	0	0	0	0	0	0	0	0	0	0	0	0	0	0	0	0	0
D014623	0	0	0	0	0	0	0	0	0	0	0	0	0	0	0	0	0	0	0	0	0	0	0	0	0	0	0	0	0	0	0	0	0	0	0	0	0	0	0	0	0	0	0	0	0	0	0	0	0
D017118	0	0	0	0	0	0	0	0	0	0	0	0	0	0	0	0	0	0	0	0	0	0	0	0	0	0	0	0	0	0	0	0	0	0	0	0	0	0	0	0	0	0	0	0	0	0	0	0	0
D007018	0	0	0	0	0	0.127879	0	0	0	0	0	0	0	0	0.2479	0	0	0	0	0	0	0.228637	0	0.273468	0.292632	0	0	0	0	0	0	0	0	0	0.241475	0	0	0	0	0	0	0	0.115119	0	0	0	0	0	0
D013064	0	0	0	0	0	0	0	0	0	0	0	0	0	0	0	0	0	0	0	0	0	0	0	0	0	0	0	0	0	0	0	0	0	0	0	0	0	0	0	0	0	0	0	0	0	0	0	0	0
D000163	0	0	0	0	0	0.1734	0	0.202993	0	0.100526	0	0.247874	0	0	0.136001	0	0	0	0	0	0	0	0	0.374778	0.37612	0	0	0	0	0	0	0	0	0	0	0.135033	0.402748	0.306415	0	0	0	0	0	0	0	0	0	0.153211	0
D015432	0	0	0	0	0	0	0	0	0	0	0	0	0	0	0	0	0	0	0	0	0	0	0	0	0.137492	0	0	0	0	0	0	0	0	0	0	0	0	0	0	0.323397	0	0	0	0	0	0	0	0	0
D003229	0	0	0	0	0	0	0	0	0	0	0	0	0	0	0	0	0	0	0	0	0	0	0	0	0	0	0	0	0	0	0	0	0	0	0	0	0	0	0	0	0	0	0	0	0	0	0	0	0
D007964	0	0	0	0	0	0	0	0	0	0	0	0	0	0	0	0	0	0	0	0	0	0	0	0.215637	0.693464	0	0	0.190463	0	0	0	0	0	0	0	0	0	0	0	0	0	0	0	0	0	0	0	0	0
D004314	0	0	0	0.200372	0.371586	0	0	0	0	0	0.202507	0	0	0	0.222867	0	0	0	0	0	0	0.675862	0.122354	0	0	0	0	0	0	0.114801	0	0	0.135484	0	0.643719	0.131543	0	0.174983	0	0	0.770155	0	0	0.233121	0.140049	0	0	0	0
D000789	0	0	0	0	0	0	0	0	0	0	0	0	0	0	0	0	0	0	0	0	0	0	0	0	0	0	0	0	0	0	0	0	0	0	0	0	0	0	0	0	0	0	0	0	0	0	0	0	0
D004933	0	0	0	0	0	0	0	0	0	0	0	0	0	0	0	0	0	0	0	0	0	0	0	0.14018	0.115064	0	0	0	0	0	0	0	0	0	0	0	0	0	0	0	0	0	0	0	0	0	0	0	0
D000312	0	0	0	0	0	0	0	0	0	0	0	0	0	0	0	0	0	0	0	0	0	0	0	0	0	0	0	0	0	0.839584	0	0	0	0	0	0	0	0	0	0	0	0	0	0	0	0	0	0	0
D025242	0	0	0	0	0	0	0	0	0	0	0	0	0	0	0	0	0	0	0	0	0	0	0	0	0.114227	0	0	0	0	0	0	0	0	0	0.209162	0.158857	0	0	0	0	0	0.168715	0	0	0	0	0	0.119395	0
D003286	0	0	0	0	0	0	0	0	0	0	0	0	0	0	0	0.429567	0	0	0	0	0.179767	0.146805	0	0	0.14798	0	0	0	0	0	0	0	0	0	0.208992	0.607249	0	0.100226	0	0	0.146815	0.279438	0	0	0	0	0	0.134762	0
D006945	0	0	0	0	0	0	0	0	0	0	0	0	0	0	0	0	0	0	0	0	0	0	0	0.13773	0.146699	0	0	0	0	0	0	0	0	0	0	0.260842	0	0	0	0	0	0	0	0	0	0	0	0	0
D052878	0	0	0	0	0	0	0	0	0	0	0	0	0	0	0	0	0	0	0	0	0	0	0	0	0	0	0	0	0	0	0	0	0	0	0	0	0	0	0	0	0	0	0	0	0	0	0	0	0
D006623	0	0	0	0	0	0	0	0.191923	0	0.337054	0	0	0	0	0	0	0	0.139185	0	0	0	0.292791	0	0	0.151335	0	0.395293	0.133358	0	0	0	0	0	0.374503	0.130064	0	0	0	0	0	0	0.148168	0	0	0	0	0	0	0
D004677	0	0	0	0	0	0	0	0	0	0	0	0	0	0	0	0	0	0	0	0	0	0	0	0	0	0	0	0	0	0	0	0	0	0	0	0	0	0	0	0	0	0	0	0	0	0	0	0	0.397369
D011565	0	0	0.116075	0	0	0.102313	0	0.117037	0	0.109038	0	0	0	0	0.136371	0	0	0	0	0	0	0	0	0.247649	0.281813	0.150866	0	0	0.100683	0	0	0	0	0	0	0.117413	0	0.252043	0	0.114077	0	0.138211	0.10725	0	0	0	0	0.254992	0
D006932	0	0	0	0	0	0	0	0	0	0	0	0	0	0	0	0	0	0	0	0	0	0	0	0	0.152073	0	0	0	0	0	0	0	0	0	0	0	0	0	0	0	0	0	0	0	0	0	0	0	0
D029242	0	0	0	0	0	0	0	0	0	0	0	0	0.163129	0	0	0	0	0	0	0	0	0.250382	0	0	0	0	0	0	0	0	0	0	0	0.738131	0	0	0	0	0	0	0	0	0	0	0	0	0	0	0
D006980	0	0.141432	0	0	0	0	0.130912	0.184526	0	0	0	0	0	0	0.227225	0.152006	0	0.101651	0	0	0	0	0	0.265171	0.297628	0	0	0.126615	0	0	0	0.195828	0.204269	0	0.255239	0.27397	0	0	0	0	0	0	0	0	0	0	0	0.345103	0
D004374	0	0	0	0	0	0	0.694744	0	0	0	0	0	0	0	0	0	0	0	0	0	0	0	0	0	0	0	0	0.116093	0	0	0	0	0	0	0	0	0	0	0	0	0	0	0	0	0	0	0	0	0
D020176	0	0	0	0	0	0	0	0	0	0	0	0	0	0	0	0	0	0	0	0	0	0	0	0	0	0	0	0	0	0	0	0	0	0	0	0	0	0	0	0	0	0	0	0	0	0	0	0	0
D006314	0	0	0	0	0	0	0	0	0	0	0	0	0	0	0	0	0	0	0	0	0	0	0	0	0	0	0.187499	0	0	0	0	0	0	0	0	0	0	0	0	0	0	0	0	0	0	0	0	0	0
D002277	0	0.116278	0	0	0	0.362944	0	0.341574	0	0.20877	0	0.355637	0	0	0.133708	0	0.201508	0.185084	0.146544	0	0	0.100081	0	0.49259	0.559039	0.340511	0.35852	0.200464	0.285624	0.428143	0	0	0	0	0.137523	0.215615	0.243991	0.37231	0	0	0	0.162347	0.218171	0	0	0.10316	0	0.216203	0
D020233	0	0	0	0	0	0	0	0	0	0	0	0	0	0	0	0	0	0	0	0	0.328978	0	0	0	0	0	0	0	0	0	0	0	0	0	0	0	0	0	0	0	0	0	0	0	0	0	0	0	0
D000987	0	0	0	0.185423	0	0	0	0	0	0	0	0	0	0	0.304213	0	0	0	0	0	0	0	0	0	0	0	0	0	0	0	0	0	0.207864	0	0	0.114946	0	0	0	0	0	0	0	0	0	0	0	0	0
D008336	0	0	0	0	0	0	0	0	0	0	0	0	0	0	0	0	0	0	0	0	0	0	0	0	0.11904	0	0	0	0	0	0	0	0	0	0	0.134869	0	0	0	0	0	0	0	0	0	0	0	0	0
D005355	0	0	0	0	0	0.276458	0.171061	0.220624	0	0.107937	0	0	0	0	0.138479	0	0	0.251839	0	0	0	0	0	0.292577	0.21679	0	0.124086	0.320897	0.16658	0	0	0	0	0	0.13689	0.125541	0	0	0	0.278677	0	0	0	0.141364	0.215862	0	0	0	0
D030981	0	0	0	0	0	0	0	0	0	0	0	0	0	0	0	0	0	0	0	0	0	0	0	0	0	0	0	0	0	0	0	0	0	0	0	0	0	0	0	0	0	0	0	0	0	0	0	0	0
D006463	0	0	0	0	0	0	0	0	0	0	0	0	0	0	0	0	0	0	0	0	0	0	0	0	0	0	0	0	0	0	0	0	0	0	0	0	0	0	0	0	0	0	0	0	0	0	0	0	0
D012559	0	0	0	0.463275	0	0	0	0	0	0	0	0	0	0	0.650607	0	0	0	0	0	0	0	0	0	0	0	0	0	0	0	0	0	0.294692	0.141636	0	0	0	0	0	0	0	0	0	0	0	0.101339	0.15279	0	0
D010212	0	0	0	0	0	0.509271	0	0.107069	0.147574	0.135664	0	0	0	0	0	0	0	0	0	0	0	0.100163	0	0.218977	0.157612	0	0	0.22786	0.435378	0	0	0	0	0	0	0	0	0	0	0	0	0	0	0	0	0	0	0	0
D020326	0	0	0.106775	0	0	0	0	0	0	0.251382	0	0	0	0	0.100728	0	0	0.114745	0	0	0	0	0	0.138531	0.162536	0	0	0.110001	0	0	0	0	0	0.120498	0	0	0	0	0	0	0	0.213701	0	0	0	0	0	0	0
D028226	0	0	0	0	0	0	0	0	0	0	0	0	0	0	0	0	0	0	0	0	0	0.112295	0	0	0.27204	0	0	0	0	0	0	0	0	0	0	0	0	0	0	0	0	0	0	0	0	0	0	0	0
D014820	0	0	0	0	0.108154	0	0	0	0.349658	0.133422	0	0	0	0	0.103476	0	0	0	0	0	0	0	0	0	0.144944	0	0	0	0	0	0	0	0.189204	0.128915	0	0	0.279582	0	0	0	0.167791	0	0	0	0	0	0	0	0
D020936	0	0	0	0	0.721427	0	0	0	0	0	0	0	0	0.116374	0	0	0	0	0	0	0	0	0.11041	0	0	0	0	0	0	0	0	0	0	0	0	0	0	0	0	0	0	0	0	0	0	0	0	0	0
D009395	0	0	0	0	0	0	0	0	0	0	0	0	0	0	0	0	0	0	0	0	0	0	0	0	0.204907	0	0	0	0	0	0	0	0	0	0	0	0	0	0	0.458339	0	0	0	0	0	0	0	0.147723	0
D009196	0	0	0	0	0	0	0	0	0	0	0	0	0	0	0	0	0	0	0	0	0	0	0	0.104169	0.263343	0	0	0	0	0	0	0	0	0	0.102738	0	0.159866	0.221471	0	0	0.274337	0	0	0	0.13791	0	0	0.106866	0
D003318	0	0	0	0	0	0	0	0	0	0	0	0	0.670824	0	0.112927	0	0	0	0	0	0	0.608472	0	0	0.102716	0	0	0	0	0	0	0	0	0.438262	0.463312	0	0	0	0	0	0	0	0	0.186931	0	0	0	0	0
D005633	0	0	0	0	0	0	0	0.601259	0	0	0	0	0	0	0	0	0	0	0	0	0	0	0	0	0	0	0	0	0	0	0	0	0	0	0	0	0	0	0	0	0	0	0	0	0	0	0	0	0
D010020	0	0	0	0	0	0	0	0	0	0	0	0	0	0	0	0	0	0	0	0	0	0	0	0	0.100646	0	0.108685	0	0	0	0	0	0	0	0	0.239306	0	0	0	0	0	0	0	0	0	0	0	0	0
D011649	0	0	0	0	0	0.385444	0	0	0	0	0	0	0	0	0	0	0	0	0	0	0	0	0	0.181516	0.196968	0	0	0	0	0	0	0	0	0	0	0	0	0	0	0	0	0	0	0	0	0	0	0	0
D006972	0	0	0	0	0	0	0	0	0	0	0	0	0	0	0.133952	0	0	0	0	0.255981	0	0.84669	0.23078	0	0	0	0.105052	0	0	0	0	0	0.145062	0	0.617488	0.127704	0	0.15351	0	0	0.754688	0	0	0.230732	0	0	0	0	0
D001176	0	0	0	0	0	0	0	0	0	0	0	0	0	0	0	0.615892	0	0	0	0	0	0	0.316459	0	0.118691	0	0.124574	0	0	0	0	0	0	0	0.318457	0.598327	0	0	0	0	0	0	0	0	0	0	0	0	0
D049288	0	0	0	0	0	0	0	0	0	0	0	0	0	0.109992	0	0.654848	0	0.237842	0	0	0.247136	0	0	0	0	0	0	0.202333	0	0	0	0	0.140541	0	0	0.653188	0	0	0	0	0	0.295166	0	0	0	0	0	0	0
D002647	0	0	0	0	0	0	0	0	0	0	0	0	0	0	0	0	0	0	0	0	0	0	0	0	0	0	0	0	0	0	0	0	0	0	0	0	0	0	0	0	0	0	0	0	0	0	0	0	0
D008223	0	0	0	0	0	0.284463	0	0.255004	0	0.121337	0	0.227351	0	0	0	0	0.145748	0	0	0	0	0	0	0.318132	0.679874	0	0.176151	0	0.216361	0	0.285134	0	0	0	0.11322	0.128214	0.252918	0.59384	0	0	0	0	0	0	0	0	0	0.186904	0
D008201	0	0	0	0	0	0	0	0	0	0	0	0	0	0	0	0	0	0	0	0	0	0	0	0	0	0	0	0	0	0	0	0	0	0	0	0	0	0	0	0	0	0	0	0	0	0	0	0	0
D012618	0	0	0	0.104573	0	0	0	0	0	0	0	0	0	0	0	0	0	0	0	0	0.216529	0.139267	0	0	0	0	0	0	0	0	0	0	0	0	0	0	0.613105	0	0	0	0	0	0	0	0	0	0.450221	0	0
D011928	0	0	0	0	0	0.105477	0	0	0	0	0	0	0	0	0	0	0	0	0	0	0	0	0	0	0	0	0	0	0	0	0	0	0	0	0	0.152666	0	0	0	0	0	0	0	0	0	0	0	0	0
D010538	0	0	0	0	0	0.31958	0	0.255164	0	0	0	0.496082	0	0	0	0	0	0	0	0	0	0	0	0	0.203381	0	0.126946	0	0	0	0	0	0	0	0	0	0	0.194932	0	0	0	0	0	0	0	0	0	0.109615	0
D002430	0	0	0	0	0	0.490626	0	0.338804	0	0	0	0.641871	0	0	0	0	0	0	0	0	0	0	0	0.207567	0.256286	0	0	0	0	0	0	0	0	0	0	0.121254	0	0.270404	0	0	0	0	0	0	0	0	0	0.149767	0
D006327	0	0	0	0	0	0.13751	0.304586	0	0	0	0	0	0	0	0	0	0	0	0	0	0	0	0	0	0	0	0	0	0	0	0	0.13812	0	0	0.109519	0	0	0	0	0	0	0	0	0	0	0	0	0	0
D020914	0	0	0	0	0	0	0	0	0	0	0	0	0	0	0	0.338594	0	0	0	0	0	0	0.708527	0	0	0	0	0	0	0	0	0	0	0	0	0.473697	0	0	0	0	0	0	0	0	0	0	0	0	0
D008654	0	0	0	0	0	0.522244	0.181695	0.171304	0	0	0	0.216805	0	0	0	0	0	0.12793	0	0	0	0	0	0.361689	0.338875	0	0.189441	0.384051	0.292794	0	0	0.140739	0	0	0.182963	0.111031	0	0.290971	0	0	0	0.169255	0	0.179988	0.182971	0	0	0.108741	0
D006330	0	0	0	0	0	0	0.218293	0	0	0	0	0	0	0	0	0	0	0.158491	0	0	0	0.15129	0	0	0	0	0.120508	0.15318	0	0	0	0	0	0	0.20639	0	0	0.117277	0	0	0.165734	0	0.135352	0.240273	0.428433	0	0	0	0
D005350	0	0	0	0	0	0	0	0	0	0	0	0	0	0	0	0	0	0	0	0	0	0	0	0.162046	0	0	0	0	0	0	0	0	0	0	0	0	0	0	0	0	0	0	0	0	0	0	0	0	0
D004421	0	0	0	0	0	0	0	0	0	0	0	0	0	0	0	0	0	0	0.164409	0	0	0	0	0	0	0	0	0	0	0	0	0	0.615275	0	0	0	0	0	0	0	0	0	0	0	0	0	0.293267	0	0
D012175	0	0	0	0	0.234685	0	0	0	0.10863	0.239644	0	0	0.285782	0	0	0	0	0.152415	0	0	0	0.577599	0	0	0.149841	0	0	0	0	0	0	0	0	0.367655	0.436834	0	0	0	0	0	0	0	0	0.154494	0	0	0	0	0
D008175	0	0	0.544049	0	0	0.401454	0	0.149604	0	0	0	0.173589	0	0	0	0	0.114151	0.172076	0	0	0	0	0	0.486601	0.46721	0	0.165597	0.306703	0.358818	0	0	0	0	0	0.116302	0.145681	0.162267	0.269217	0	0	0	0.14024	0.121152	0	0.113438	0	0	0.126757	0
D006509	0	0	0	0	0.10371	0	0	0.718832	0	0	0	0	0	0	0	0	0	0	0	0	0	0.163597	0	0	0.241694	0	0	0	0	0	0	0	0	0	0.1778	0	0.138016	0.664013	0	0	0	0	0	0	0	0	0	0	0
D007647	0	0	0	0	0	0	0	0	0	0	0	0	0	0	0	0	0	0	0	0	0	0	0	0	0.116055	0	0	0	0	0	0	0	0	0	0	0	0	0	0	0	0	0	0	0	0	0	0	0	0
D006526	0	0	0.129703	0	0	0	0	0.347181	0	0	0	0	0	0	0.112623	0	0	0	0	0	0	0	0	0.213285	0.318436	0.134341	0	0	0	0	0	0	0	0	0	0.132235	0.626715	0	0	0.111955	0	0	0.102923	0	0	0	0	0.184721	0
D006201	0	0	0	0	0	0	0	0	0	0	0	0	0	0	0.105446	0	0	0	0	0	0	0.558654	0	0	0	0.549974	0	0	0	0.176239	0	0	0	0	0.445761	0	0	0	0	0	0	0	0	0.156738	0	0	0	0	0
D011693	0	0	0	0	0	0	0	0	0	0	0	0	0	0	0	0	0	0	0	0	0	0	0	0	0	0	0	0	0	0	0	0	0	0	0	0	0	0	0	0	0	0	0	0	0	0	0	0	0
D024821	0	0	0	0	0	0	0	0.108155	0	0.133716	0	0	0	0	0.167624	0	0	0	0	0	0	0	0	0.293934	0	0.353233	0	0	0	0	0	0	0	0	0	0	0	0.251016	0	0.153205	0	0	0	0	0	0	0	0.103271	0
D009800	0	0	0	0	0	0	0	0	0	0	0	0	0	0	0	0	0	0	0	0	0	0	0	0	0.128288	0	0	0	0	0	0	0	0	0	0	0	0	0	0	0	0	0	0	0	0	0	0	0	0
D014581	0	0	0	0	0	0	0	0	0	0	0	0	0	0	0	0	0	0	0	0	0	0	0	0	0.145215	0	0	0	0	0	0	0	0	0	0	0	0	0	0	0	0	0	0	0	0	0	0	0.150898	0
D008664	0	0	0	0	0.646229	0	0	0.16123	0	0	0	0	0	0	0.126735	0	0	0	0	0	0	0.472412	0	0	0.104742	0	0	0	0	0	0	0	0.115014	0	0	0.122257	0	0	0	0	0	0	0	0	0	0	0	0.292708	0
D004342	0	0	0.217389	0	0	0.29598	0	0.214897	0.152575	0	0	0.141303	0	0	0	0	0	0	0	0	0	0	0	0.233211	0.599576	0	0.197064	0.123554	0.290949	0	0	0	0	0	0.118881	0.138655	0.121671	0.500998	0	0	0	0.13655	0.14987	0.116859	0	0.114583	0	0.169472	0
D017887	0	0	0	0	0	0	0	0	0	0	0	0	0	0	0	0	0	0	0	0	0	0	0.123163	0	0	0	0	0	0	0	0	0	0	0	0	0.193522	0	0	0	0	0	0	0	0	0	0	0	0	0
D020417	0	0	0	0	0	0	0	0	0	0	0	0	0	0	0	0	0	0	0	0	0	0	0	0	0	0	0	0	0	0	0	0	0	0	0	0	0	0	0	0	0	0	0	0	0	0	0	0	0
D014552	0	0	0	0	0	0.107462	0	0	0	0	0	0	0	0	0	0	0	0	0	0	0	0	0	0.103491	0.397151	0	0	0	0	0	0	0	0	0	0	0	0	0	0	0.130235	0	0	0	0	0	0	0	0	0
D000748	0	0	0	0	0	0	0	0	0	0	0	0	0	0	0.113232	0	0	0	0	0	0	0	0	0	0.239458	0	0	0	0	0	0	0	0	0	0	0.127614	0	0	0	0.27729	0	0	0	0.102309	0	0	0	0.146817	0
D011547	0	0	0	0	0.575622	0	0	0	0	0	0	0	0	0	0.161387	0	0	0	0	0	0	0	0	0	0	0	0	0	0	0	0	0	0	0	0	0	0	0	0	0	0	0	0	0	0	0	0	0	0
D002545	0	0	0	0.361102	0.209346	0	0	0	0	0	0	0	0	0	0.181142	0	0	0.572831	0	0	0	0	0	0	0.174694	0	0	0.51027	0	0	0	0.204459	0	0	0	0.143785	0	0	0	0	0	0	0	0	0	0	0	0	0
D000013	0	0	0	0	0.252811	0	0	0	0	0	0	0	0	0	0.161392	0	0	0	0	0	0	0.58502	0	0	0.239784	0	0	0	0	0.124888	0	0	0	0	0.466322	0.114243	0	0.238408	0	0	0	0	0	0.163544	0.119153	0	0	0	0
D012873	0	0	0	0	0	0	0	0	0	0	0	0	0	0	0	0	0	0	0	0	0	0	0	0	0	0	0	0	0	0	0	0	0	0	0	0	0	0	0	0	0	0	0	0	0	0	0	0	0
D013733	0	0	0	0	0	0.10866	0	0.129446	0.174083	0	0	0	0	0	0	0	0	0	0	0	0	0	0	0.186681	0.13832	0	0	0	0	0.146091	0	0	0	0	0.220843	0.328012	0	0	0	0	0	0	0	0	0	0	0	0	0
D014652	0	0	0	0	0	0	0	0	0.101439	0.105433	0	0	0	0	0	0	0	0	0	0	0	0	0	0.104918	0.112907	0	0.202021	0	0	0	0	0	0	0	0	0.170091	0	0	0	0	0	0	0	0	0	0	0	0	0
D003550	0	0	0	0	0	0.328787	0	0.131065	0	0	0	0	0	0	0.152276	0	0	0.367573	0	0	0	0	0	0.314169	0.238294	0	0	0.429419	0	0	0	0	0	0	0	0.106515	0.142867	0.262548	0	0	0	0	0.228365	0	0	0	0	0.111663	0
D004827	0	0	0	0.17011	0.893476	0	0	0	0.243985	0	0	0	0	0.263355	0.322485	0	0	0	0.198478	0	0	0.33264	0	0	0.10595	0	0	0	0	0	0	0	0.141136	0	0.279576	0.109695	0	0.111202	0	0	0.308495	0	0	0.141301	0	0.516305	0	0.13331	0
D020734	0	0	0	0.217091	0	0	0	0	0	0	0	0	0	0	0.128052	0	0	0	0.341588	0	0.311006	0	0	0	0	0	0	0	0	0	0	0	0.406569	0	0	0	0	0	0	0	0	0	0	0	0	0	0.84457	0	0
D015211	0	0	0	0	0	0	0	0	0	0	0	0	0	0	0	0	0	0	0	0	0	0	0.70704	0	0	0	0	0	0	0	0	0	0	0	0	0.116538	0	0	0	0	0	0	0	0	0	0	0	0	0
D009087	0	0	0	0	0	0	0	0	0	0	0	0	0	0	0	0	0	0	0	0	0	0	0	0	0.175814	0	0	0	0	0	0	0	0	0	0	0	0	0	0	0	0	0	0	0	0	0	0	0	0
D000130	0	0	0	0	0	0	0	0	0	0.10053	0	0	0	0	0	0	0	0	0	0	0	0.338323	0	0	0.176557	0	0	0	0	0	0	0	0	0	0.332606	0.161094	0	0	0	0	0	0	0	0.107002	0	0	0	0	0
D002544	0	0	0	0.256695	0	0	0	0	0	0.196217	0	0	0	0	0.133836	0.102636	0	0	0.243669	0	0.137855	0	0	0	0.101956	0	0.110077	0	0	0	0	0	0	0	0	0.221575	0	0	0	0	0	0	0.14574	0	0	0	0	0	0
D000307	0	0	0	0	0	0	0	0	0	0	0	0	0	0	0	0	0	0	0	0	0	0	0	0	0	0	0	0	0	0.605901	0	0	0	0	0	0	0	0	0	0	0	0	0	0	0	0	0	0	0
D001478	0	0	0	0	0	0	0	0	0	0	0	0	0	0	0	0	0	0	0	0	0	0	0	0	0	0.160848	0	0	0	0.474518	0	0	0	0	0	0	0	0	0	0	0	0	0	0	0	0	0	0	0
D008105	0	0	0	0	0	0	0	0	0	0	0	0	0	0	0	0	0	0	0	0	0	0	0	0	0.136199	0	0	0	0	0	0	0	0	0	0	0	0.110646	0	0	0	0	0	0	0	0	0	0	0	0
D018488	0	0	0	0	0	0	0	0	0	0	0	0	0	0	0	0	0	0	0	0	0	0	0	0	0	0	0	0	0	0	0	0	0	0	0	0	0	0	0	0	0	0	0	0	0	0	0	0	0
D006996	0	0	0	0	0.27878	0	0.100185	0	0	0	0	0	0	0	0	0	0	0	0	0	0	0	0	0	0	0	0	0	0	0	0	0	0	0	0	0	0	0	0	0	0	0	0	0	0	0	0	0.855151	0
D001749	0	0.208196	0	0	0	0.158518	0	0.136335	0	0.114477	0	0.17348	0	0	0	0	0	0	0	0	0	0	0	0.290053	0.450282	0	0.14955	0	0.113113	0	0	0	0	0	0.145865	0.114778	0	0.219533	0	0.181736	0	0	0.137793	0	0	0	0	0.141205	0
D007855	0	0	0	0.12574	0	0	0	0	0	0	0	0	0	0	0.253498	0	0	0	0	0	0	0	0	0.126043	0.184077	0	0	0	0	0	0	0	0	0	0.368634	0	0	0	0	0.118514	0	0	0	0	0	0	0	0	0
D007738	0	0	0	0	0	0	0	0	0	0	0	0	0	0	0	0.12334	0	0.215898	0	0	0	0	0.106791	0	0.202202	0	0	0	0	0	0	0	0	0	0.266612	0	0	0	0	0	0	0	0	0	0	0	0	0	0
D046589	0	0	0	0.329874	0	0	0	0	0	0	0	0	0	0	0.162363	0	0	0	0	0	0	0	0	0	0.100313	0	0	0	0	0	0	0	0	0	0	0.145791	0	0	0	0	0	0	0	0	0	0	0	0	0
D050500	0	0	0	0	0	0.382326	0	0.543454	0	0	0	0	0	0	0	0	0	0	0	0	0	0	0	0.120023	0.126391	0	0	0	0	0	0	0	0	0	0	0.119685	0	0	0	0	0	0	0	0	0	0	0	0	0
D020821	0	0	0	0	0	0	0	0	0	0	0	0	0	0	0	0	0	0	0.171222	0	0	0	0	0	0	0	0	0	0	0	0	0	0.605079	0	0	0	0	0	0	0	0	0	0	0	0	0	0	0	0
D005512	0	0	0	0	0	0	0	0	0	0	0	0	0	0	0	0	0	0	0	0	0	0	0	0.220773	0	0	0	0	0	0	0	0	0	0	0	0	0	0	0	0	0	0	0	0	0	0	0	0	0
D011248	0	0	0	0	0	0.152074	0	0.183313	0	0.101651	0	0	0	0	0.160362	0	0	0	0	0	0	0	0	0.247161	0.281153	0	0	0	0	0	0	0	0	0	0	0	0	0	0	0	0.183032	0	0	0	0	0	0	0.220448	0
D008178	0	0	0	0	0	0	0	0	0	0	0	0	0	0	0	0	0	0	0	0	0	0	0	0	0.143108	0	0	0	0	0	0	0	0	0	0	0	0	0	0	0	0	0	0	0	0	0	0	0	0
D006009	0	0	0	0	0	0	0	0	0	0	0	0	0	0	0	0.460838	0	0.115067	0	0	0	0	0.451838	0	0.10536	0	0	0	0	0	0	0	0	0	0	0.519705	0	0	0	0	0	0	0	0	0	0	0	0	0
D004830	0	0	0	0.151323	0	0	0	0	0	0	0	0	0	0	0	0	0	0	0	0	0	0	0	0	0	0	0	0	0	0	0	0	0	0	0	0.1441	0	0	0	0	0	0	0	0	0	0	0	0	0
D018263	0	0	0	0	0	0.213542	0	0	0	0	0	0	0	0	0	0	0	0	0	0	0	0.140974	0	0.163061	0.115041	0	0	0	0.194011	0	0	0	0	0	0.13312	0	0	0	0	0	0	0	0	0	0	0	0	0	0
D003715	0	0	0	0	0	0	0	0	0	0	0	0	0	0	0	0	0	0	0	0	0	0	0	0	0.724136	0	0	0	0	0	0	0	0	0.155815	0	0	0	0	0	0	0	0	0	0	0	0	0	0	0
D058186	0	0	0	0	0	0	0	0.133297	0	0	0	0	0	0	0	0	0	0	0	0	0	0	0	0	0.157585	0	0	0	0	0	0	0	0	0	0	0	0	0	0	0.1485	0	0	0.100373	0	0	0	0	0.114142	0
D009634	0	0	0	0	0	0	0.143701	0	0.396732	0	0	0	0	0	0.128528	0	0	0	0	0	0	0.562197	0.163927	0	0	0	0	0	0	0	0	0	0	0	0.49837	0.133566	0	0.161855	0	0	0.722187	0	0	0.256443	0.277683	0	0	0	0
D054332	0	0	0	0	0	0	0	0	0	0	0	0	0	0	0	0	0	0	0	0	0	0	0	0.17422	0	0	0	0	0	0	0	0	0	0	0	0	0	0	0	0	0	0	0	0	0	0	0	0	0
D010013	0	0	0	0	0	0	0	0	0	0	0	0	0	0	0	0	0	0	0	0	0	0	0	0	0.107973	0	0.246205	0	0	0	0	0	0	0	0.174548	0	0	0	0	0	0	0	0	0	0	0	0	0	0
D002764	0	0	0	0	0	0	0	0	0	0	0	0	0	0	0	0	0	0	0	0	0	0	0	0.136481	0.256173	0	0	0	0	0	0	0	0	0	0	0	0	0	0	0	0	0	0	0	0	0	0	0	0
D003866	0	0	0	0.337623	0.110824	0	0	0	0	0	0	0	0	0	0.840119	0	0	0	0	0	0	0	0	0.141063	0.129337	0	0.100263	0	0	0	0	0	0.244282	0	0.140583	0.110386	0	0	0	0	0	0	0	0	0	0	0	0.128928	0
D015173	0	0	0	0.152139	0.509635	0	0	0	0	0.235717	0	0	0	0	0.218473	0	0	0	0	0	0	0	0	0.116474	0.208278	0	0	0	0	0	0	0	0	0	0	0	0	0	0	0	0	0	0	0	0	0	0	0	0
D002524	0	0	0	0	0	0	0	0	0	0	0	0	0	0	0	0	0	0	0.243225	0	0.477906	0	0	0	0	0	0	0	0	0	0	0	0	0	0	0	0	0	0	0	0	0	0	0	0	0	0	0	0
D006984	0	0	0	0	0	0	0	0	0	0	0	0	0	0.191058	0.108695	0.69545	0	0	0	0	0.264523	0	0	0.102861	0.125559	0.131775	0	0	0	0.224065	0	0	0	0	0.20542	0.594547	0	0	0	0.263373	0.105392	0	0	0	0	0	0	0	0
D012600	0	0	0	0	0.1007	0	0	0	0	0	0	0	0	0	0	0.206949	0	0.240074	0	0	0.150418	0.213219	0.115678	0	0.173152	0	0.381271	0.254052	0	0	0	0	0	0	0.429286	0.403966	0	0	0	0	0	0	0	0.122785	0	0	0	0.15052	0
D004890	0	0	0	0	0	0	0	0	0	0	0	0	0	0	0	0	0	0	0	0	0	0	0	0	0.263356	0	0	0	0	0	0	0	0	0	0	0	0	0	0	0	0	0	0	0	0	0	0	0	0
D011230	0	0	0	0	0	0.117046	0	0.145914	0	0.120644	0	0.282595	0	0	0.136067	0	0	0	0	0	0	0	0	0.434676	0.140446	0.150456	0	0.10973	0	0	0	0	0	0	0	0	0	0	0	0	0	0	0.104934	0	0	0	0	0.135211	0
D003677	0	0	0	0	0	0.101583	0	0.118839	0	0	0	0.123814	0	0	0.16654	0	0	0	0	0	0	0	0	0.269735	0.189986	0	0	0	0.142064	0	0	0	0	0	0	0.113919	0	0	0	0	0	0	0	0	0	0	0	0	0
D013580	0	0	0	0	0	0	0	0	0	0	0	0	0	0	0.102533	0.109525	0	0	0	0	0	0.606222	0.271781	0	0	0	0.190317	0	0	0	0	0	0	0	0.442859	0.271241	0	0	0	0	0	0	0	0.1471	0	0	0	0	0
D018798	0	0	0	0	0	0	0.128653	0.19123	0	0	0	0	0	0	0.233979	0	0	0.135326	0	0	0	0	0	0.340814	0.316212	0	0.121529	0.169913	0.204	0	0	0	0	0	0.159696	0.108148	0	0.289925	0	0	0.172804	0	0	0	0	0	0	0.164383	0
D016889	0	0	0	0	0	0.179607	0	0.159795	0	0.149889	0	0.121204	0	0	0.17271	0	0	0	0	0	0	0	0	0.336406	0.157922	0.328521	0	0	0	0	0	0	0	0	0	0	0	0.295747	0	0	0	0	0	0	0	0	0	0.126184	0
D007589	0	0	0	0	0	0	0	0	0	0	0	0	0	0	0	0	0	0	0	0	0	0	0	0	0	0	0	0	0	0	0	0	0	0	0	0	0.194573	0	0	0	0	0	0	0	0	0	0	0	0
D051642	0	0.249359	0	0	0.137992	0.297088	0.167494	0.168788	0.214631	0.210255	0	0.158318	0	0	0	0	0	0	0	0	0	0.136907	0	0.225413	0.4758	0	0	0	0	0	0	0	0	0	0.266236	0.178921	0	0.3919	0	0	0	0	0.181552	0.118893	0	0	0	0.121088	0
D012772	0	0	0	0	0	0	0	0	0	0	0	0	0	0	0	0	0	0	0	0	0	0	0	0.170031	0.4229	0	0	0	0	0	0	0	0	0	0	0.110795	0	0	0	0	0	0	0	0	0	0	0	0	0
D055370	0	0	0	0	0	0	0	0	0	0	0	0	0	0	0	0	0	0	0	0	0	0	0	0	0	0	0	0	0	0	0	0	0	0	0	0	0	0	0	0	0	0	0	0	0	0	0	0	0
D015418	0	0	0	0	0	0	0	0	0	0	0	0	0.139934	0	0	0	0	0	0	0	0	0	0	0	0	0	0	0	0	0	0	0	0	0.618073	0	0	0	0	0	0	0	0	0	0	0	0	0	0	0
D012893	0	0	0	0	0	0	0	0	0	0	0	0	0	0	0.241471	0	0	0	0	0	0	0	0	0	0	0	0	0	0	0	0	0	0	0	0	0	0	0	0	0	0	0	0	0	0	0	0	0	0
D004715	0	0	0	0	0	0.164624	0	0	0	0	0	0	0	0	0	0	0	0	0	0	0	0	0	0	0	0	0	0	0	0	0	0	0	0	0	0	0	0	0	0	0	0	0	0	0	0	0	0	0
D015614	0	0	0	0	0	0	0	0	0	0	0	0	0	0	0	0	0	0	0	0	0	0	0	0	0	0	0	0	0	0	0	0	0	0	0	0	0	0	0	0	0	0	0	0	0	0	0	0	0
D014079	0	0	0	0	0	0	0	0	0	0	0	0	0	0	0	0	0	0	0	0	0	0	0	0	0	0	0	0	0	0	0	0	0	0	0	0	0	0	0	0	0	0	0	0	0	0	0	0	0
D002278	0	0	0	0	0	0	0	0.158742	0	0.104742	0	0	0	0	0	0	0	0	0	0	0	0	0	0.336728	0.442429	0	0	0	0	0	0	0	0	0	0	0	0	0	0	0	0	0	0	0	0	0	0	0	0
D012868	0	0	0	0	0	0	0	0	0.262741	0	0	0	0	0	0	0.123319	0	0	0	0	0	0.701163	0.122579	0	0	0	0	0	0	0	0	0	0.1185	0	0.649848	0.19233	0	0	0	0	0.785713	0	0	0.23325	0	0	0	0	0
D013103	0	0	0	0	0	0.11268	0	0.741579	0	0	0	0.15755	0	0	0	0	0	0	0	0	0	0	0	0	0.206917	0	0	0	0	0	0	0	0	0	0	0	0.222685	0	0	0	0	0	0	0	0	0	0	0	0
D003922	0	0	0	0	0	0	0	0	0	0	0	0	0	0	0	0	0	0	0	0	0	0	0	0	0	0.11027	0	0	0	0	0	0	0	0	0	0	0	0	0	0.97142	0	0	0.134669	0	0	0	0	0	0
D004401	0	0	0	0	0	0	0	0	0	0	0	0	0	0	0	0	0	0	0	0	0	0	0	0	0	0	0	0	0	0	0	0	0	0	0	0	0	0	0	0	0	0	0	0	0	0	0	0	0
D003924	0	0	0	0	0	0	0	0	0	0.114685	0	0	0	0	0.151376	0	0	0	0	0	0	0	0	0.248622	0	0.289859	0	0	0	0	0	0	0	0	0	0	0	0.202346	0	0.703866	0	0	0.144708	0	0	0	0	0.104789	0
D017085	0	0	0	0	0	0	0	0	0	0	0	0	0	0	0	0	0	0	0	0	0	0	0	0	0	0	0	0	0	0	0	0	0	0	0	0	0	0	0	0	0	0	0	0	0	0	0	0	0
D011297	0	0	0	0	0	0	0	0	0	0	0	0	0	0	0	0	0	0	0	0	0	0	0	0	0	0	0	0	0	0	0	0	0	0	0	0	0	0	0	0	0	0	0	0	0	0	0	0	0
D006958	0	0	0	0	0	0	0	0	0	0	0	0	0	0	0	0	0	0	0	0	0	0	0	0	0.2869	0	0	0	0	0	0	0	0	0	0.173152	0	0	0	0	0	0	0	0	0	0	0	0	0	0
D014842	0	0	0	0	0	0	0	0	0	0	0	0	0	0	0	0	0	0	0	0	0	0	0	0	0.275229	0	0	0	0	0	0	0	0	0	0	0	0	0	0	0	0	0	0	0	0	0	0	0	0
D005833	0	0	0	0	0	0	0	0.203339	0	0	0	0	0	0	0.116311	0	0	0	0	0	0	0	0	0.438287	0.578539	0	0	0	0	0	0	0	0	0	0	0.1732	0	0	0	0	0	0	0	0	0	0	0	0	0
D001195	0	0	0	0	0	0	0	0	0	0	0	0	0	0	0	0	0	0.141836	0	0	0	0	0	0.15735	0	0	0	0.421503	0	0	0	0	0	0	0	0	0	0	0	0	0	0	0	0	0	0	0	0	0
D018901	0	0	0	0	0	0	0	0	0	0	0	0	0	0	0.116271	0	0	0	0	0	0	0	0.663955	0	0	0	0	0	0	0	0	0	0	0	0	0.146403	0	0	0	0	0	0	0	0	0	0	0	0	0
D000008	0	0	0	0	0	0.482734	0	0.417005	0	0	0	0.593503	0	0.21348	0	0	0	0	0	0	0	0	0	0.240088	0.355559	0	0	0	0.122492	0	0	0	0	0	0	0.14112	0	0	0	0	0	0	0	0	0	0	0	0.156012	0
D002532	0	0	0	0.200941	0	0	0	0	0	0.609877	0	0	0	0	0.113791	0	0	0	0	0	0	0	0	0	0.190047	0	0	0	0	0	0	0	0	0.202036	0.22105	0.242398	0	0	0	0	0	0	0	0	0	0	0	0	0
D003645	0	0	0	0	0	0	0	0	0	0	0	0	0	0	0.161654	0	0	0	0	0	0	0	0	0	0.125808	0	0	0	0	0	0	0	0	0	0	0	0	0	0	0	0	0	0	0	0.178681	0	0	0	0
D006985	0	0	0	0	0	0	0	0	0	0	0	0	0	0	0	0	0	0	0	0	0	0	0	0	0	0	0	0.107776	0	0	0	0	0	0	0	0	0	0	0	0	0	0	0	0	0	0	0	0	0
D000230	0	0	0	0	0	0.31675	0	0.396161	0	0.153793	0	0.431333	0	0	0.126428	0	0.249741	0.126567	0	0	0	0	0	0.685316	0.559149	0.125995	0.233142	0.149014	0.222856	0	0	0	0	0	0.131848	0.188782	0.215029	0.450614	0	0	0	0.132484	0.140041	0	0	0	0.103474	0.205634	0
D004393	0	0	0	0	0	0	0	0	0	0	0	0	0	0	0.323396	0	0	0	0	0	0	0.296337	0	0.247278	0.152944	0	0	0	0	0	0	0	0	0	0.300855	0	0	0	0	0	0.342792	0	0	0.103475	0	0	0	0.149353	0
D008661	0	0	0	0	0.545456	0	0	0	0.132228	0	0.21882	0	0	0	0.211834	0	0	0	0.150973	0	0	0.740382	0.246299	0	0.151296	0	0	0	0.100691	0.148158	0	0	0.197894	0	0.698893	0.204445	0	0.25367	0	0	0.818417	0	0	0.242258	0	0	0	0.123992	0
D054971	0	0	0	0	0	0	0	0	0	0	0	0	0	0	0	0	0	0	0	0	0	0	0	0	0	0	0	0	0	0	0	0	0	0	0	0	0	0	0	0	0	0	0	0	0	0	0	0	0
D006552	0	0	0	0	0	0	0	0.209338	0	0	0	0	0	0	0	0	0	0	0	0	0	0	0	0.214776	0.148826	0	0	0	0	0	0	0	0	0	0.134281	0.273415	0	0	0	0	0	0	0	0	0	0	0	0.145323	0
D005499	0	0	0	0	0	0	0	0	0	0	0	0	0	0	0	0	0	0	0	0	0	0	0	0	0	0.11837	0	0	0	0	0	0	0	0	0	0	0	0	0	0	0	0	0	0	0	0	0	0	0
D016470	0	0	0	0	0	0	0	0	0	0	0	0	0	0	0	0	0	0	0	0	0	0	0	0.147207	0.705578	0	0	0	0	0	0	0	0	0	0	0	0	0	0	0	0	0	0	0	0	0	0	0	0
D009767	0	0	0	0	0	0	0	0	0	0	0	0	0	0	0	0	0	0	0	0	0	0	0	0	0	0	0	0	0	0	0	0	0	0	0	0	0	0	0	0	0	0	0	0	0	0	0	0	0
D009889	0	0	0	0	0	0	0	0	0	0	0	0	0	0	0	0	0	0	0	0	0	0	0	0	0	0	0	0	0	0	0	0	0	0	0	0	0	0	0	0	0	0	0	0	0	0	0	0	0
D064420	0	0	0	0	0	0	0	0	0	0	0	0	0	0.166753	0.212753	0	0	0	0	0	0	0	0	0.255244	0.401103	0	0	0	0	0	0	0	0	0	0	0.13871	0	0.151343	0	0	0	0	0.113072	0	0	0	0	0.179251	0
D053040	0	0	0	0	0	0	0	0	0	0	0	0	0	0	0	0	0	0	0	0	0	0	0	0	0	0	0	0	0	0	0	0	0	0	0	0	0	0	0	0	0	0	0	0	0	0	0	0	0
D016532	0	0	0	0	0	0	0	0	0	0	0	0	0	0	0	0	0	0	0	0	0	0	0	0	0	0	0	0	0	0	0	0	0	0	0	0	0	0	0	0	0	0	0	0	0	0	0	0	0
D001361	0	0	0	0	0	0	0	0	0	0	0	0	0	0	0	0	0	0	0	0	0	0	0	0	0	0	0	0	0	0	0	0	0	0	0	0	0	0	0	0	0	0	0	0	0	0	0	0	0
D020181	0	0	0	0	0	0	0	0	0	0	0	0	0	0	0.104144	0	0	0	0	0	0	0	0	0	0	0	0	0	0	0	0	0	0	0	0	0	0	0	0	0	0	0	0	0	0	0	0	0	0
D008288	0	0	0	0	0.122975	0.208229	0	0.21267	0	0	0	0.108084	0	0	0	0	0	0	0	0	0	0	0	0.13307	0.716037	0	0	0	0.2843	0	0	0	0	0	0	0	0.150222	0	0	0	0	0	0	0	0	0.161573	0	0.12198	0
D018981	0	0	0	0	0.418341	0	0	0	0	0	0	0	0	0	0.16656	0	0	0	0	0	0	0	0.519844	0	0.105172	0	0	0	0.104059	0	0	0	0	0	0	0.167769	0	0	0	0	0	0	0	0	0	0	0	0	0
D007416	0	0	0	0	0	0.327678	0	0.260805	0	0	0	0	0	0	0	0	0.260885	0	0	0	0	0	0	0	0.181911	0	0.1348	0	0	0	0	0	0	0	0	0	0	0	0	0	0	0	0	0	0	0	0	0	0
D013272	0	0	0	0	0	0.173059	0	0.217378	0	0	0	0	0	0	0	0	0.451811	0	0	0	0	0	0	0.507778	0.19277	0	0.101403	0	0	0	0	0	0	0	0	0	0	0	0	0	0	0	0	0	0	0	0	0	0
D009085	0	0	0	0	0	0	0	0	0	0	0	0	0	0	0	0	0	0	0	0	0	0	0	0	0.112334	0	0	0	0	0	0	0	0	0	0	0	0	0	0	0	0	0	0	0	0	0	0	0	0
D012035	0	0	0	0	0	0	0	0	0	0.188176	0	0	0	0	0	0.421858	0	0	0	0	0.417142	0	0	0	0	0	0	0	0	0	0	0	0	0	0	0.324304	0	0	0	0	0	0	0	0	0	0	0	0	0
D016471	0	0	0	0	0	0	0	0	0	0	0	0	0	0	0	0	0	0	0	0	0	0	0	0.157864	0.241015	0	0	0	0	0.13109	0	0	0	0	0	0.104715	0	0	0	0	0	0	0	0	0	0	0	0	0
D007787	0	0	0	0	0	0	0	0.201476	0	0	0	0.235145	0	0	0	0	0	0	0	0	0	0	0	0.101873	0.131035	0	0	0	0.211249	0	0	0	0	0	0	0	0	0	0	0	0	0	0	0	0	0	0	0	0
D018476	0	0	0	0	0	0	0	0	0	0	0	0	0	0	0	0	0	0	0	0	0	0	0	0	0	0	0	0	0	0	0	0	0	0	0	0	0	0	0	0	0	0	0	0	0	0	0	0	0
D010051	0	0	0	0	0	0.256482	0	0.132024	0	0	0	0.17487	0	0	0	0	0	0	0	0	0	0	0	0.158401	0.229118	0.605431	0.140003	0	0	0.824482	0	0	0	0	0	0	0	0.103825	0	0	0	0	0	0	0	0	0	0	0
D005199	0	0	0	0	0	0	0	0	0.552047	0	0	0	0	0	0.100012	0	0	0	0	0	0	0.424334	0	0	0.128	0	0	0	0	0	0	0	0	0	0.362509	0	0	0	0	0	0.552353	0	0	0.153711	0	0	0	0	0
D016584	0	0	0	0	0	0	0.109771	0	0	0	0	0	0	0	0.183824	0	0	0.136907	0	0	0	0	0	0	0	0	0	0.188027	0	0	0	0.16683	0	0	0.120178	0	0	0	0	0	0	0	0	0	0	0	0	0	0
D008108	0	0	0	0	0	0.12297	0	0.288565	0	0	0	0	0	0	0.185758	0	0.108099	0.244174	0	0	0	0	0	0.320228	0.150189	0.261025	0	0.216249	0	0.297904	0	0	0	0	0	0	0	0	0	0	0	0	0	0	0	0	0	0	0
D001035	0	0	0	0	0	0	0	0	0	0	0	0	0.394154	0	0	0	0	0	0	0	0	0	0	0	0	0	0	0	0	0	0	0	0	0.105374	0	0	0	0	0	0	0	0	0	0	0	0	0	0	0
D002869	0	0	0	0	0	0	0	0	0	0	0	0	0	0	0.186504	0	0	0	0	0	0	0	0.156434	0	0	0	0	0	0	0.137396	0	0	0	0	0	0.151163	0	0	0	0	0	0	0	0.251941	0	0	0	0	0
D006995	0	0	0	0	0	0	0	0	0	0	0	0	0	0	0	0	0	0	0	0	0.346856	0	0	0.111056	0.108754	0	0	0	0	0	0	0	0	0	0.431934	0	0	0	0	0	0	0	0	0	0	0	0	0	0
D014625	0	0	0	0	0	0	0	0	0	0	0	0	0	0	0	0	0	0	0	0	0	0	0	0	0.104296	0	0	0	0	0	0	0	0	0	0	0	0	0	0	0	0	0	0	0	0	0	0	0	0
D016511	0	0	0	0	0	0	0	0	0	0	0	0.106158	0	0	0	0	0	0	0	0	0	0	0	0.103534	0.27547	0	0	0	0	0	0	0	0	0	0	0	0.548198	0	0	0	0	0	0	0	0	0	0	0	0
D003371	0	0	0	0	0	0.261787	0	0	0	0	0	0	0	0	0	0	0	0	0	0	0	0	0	0.138812	0	0	0	0.156642	0	0	0	0	0	0	0	0	0.144268	0	0	0	0	0	0	0	0	0	0	0	0
D000743	0	0	0	0	0	0	0	0.372922	0	0	0	0	0	0	0	0	0	0	0	0	0	0	0	0	0.149632	0	0	0	0	0	0	0	0	0	0	0	0.131699	0	0	0	0	0	0	0	0	0	0	0	0
D002114	0	0	0	0	0.218666	0.294056	0.299767	0.162961	0	0.152904	0.149506	0	0	0	0.162344	0	0	0	0	0	0.114438	0.272712	0	0.163938	0.214333	0	0	0.110707	0	0	0	0.447554	0.192192	0	0.416675	0.282054	0	0	0	0.137445	0	0	0	0.511018	0	0	0	0.270668	0
D006506	0	0	0	0	0	0	0	0	0	0	0	0	0	0	0	0	0	0	0	0	0	0	0	0	0.210501	0	0	0	0	0	0	0	0	0	0	0	0	0.682699	0	0	0	0	0	0	0	0	0	0	0
D056929	0	0	0	0	0	0	0	0	0	0	0	0	0	0	0	0	0	0	0	0	0	0	0	0	0.64635	0	0	0	0	0	0	0	0	0	0	0	0	0	0	0	0	0	0	0	0	0	0	0	0
D007172	0	0	0	0	0	0	0	0	0	0	0	0	0	0	0.152286	0	0	0	0	0	0	0	0	0.118011	0.112158	0	0.107736	0	0	0	0	0	0	0	0	0	0	0	0	0	0	0	0	0	0	0	0	0	0
D018455	0	0	0	0	0	0	0	0	0	0	0	0	0	0	0	0	0	0	0	0	0	0	0	0	0	0	0	0	0	0	0	0	0	0	0	0	0	0	0	0	0	0	0	0	0	0	0	0	0
D013915	0	0	0	0	0	0	0	0	0	0	0	0	0	0	0	0	0	0	0	0	0	0	0	0	0.229054	0	0	0	0	0	0	0	0	0	0	0	0	0	0	0	0	0	0	0	0	0	0	0	0.61913
D014594	0	0	0	0	0	0.309723	0	0.210914	0	0.144164	0	0.231781	0	0	0.135938	0	0	0	0	0	0	0	0	0.341824	0.281726	0.348998	0	0	0.102468	0.127145	0	0	0	0	0	0.130622	0	0.327003	0	0	0	0	0	0	0	0	0	0.17745	0
D013576	0	0	0	0	0	0	0	0	0	0	0	0	0	0	0.158902	0	0	0	0	0.3062	0	0.791872	0.1494	0	0.104194	0	0	0	0	0.117825	0	0	0	0	0.657983	0.160173	0	0	0	0	0	0	0	0.261649	0.16452	0	0	0	0
D045169	0	0	0	0	0	0	0	0	0	0	0	0	0	0	0	0	0	0	0	0	0	0	0	0.172869	0	0	0	0	0	0	0	0	0	0	0	0	0	0	0	0	0	0	0	0	0	0	0	0.120704	0
D010900	0	0	0	0	0	0	0	0	0	0	0	0	0	0	0.180998	0	0	0	0	0	0	0	0	0.171764	0.254066	0	0	0	0	0.174628	0	0	0	0.298343	0.234901	0.139042	0	0	0	0	0	0	0	0	0	0	0	0	0
D007014	0	0	0	0	0	0	0	0	0	0	0	0	0	0	0	0	0	0	0	0	0	0	0	0	0	0	0	0	0	0	0	0	0	0	0	0	0	0.113054	0	0	0	0	0	0	0	0	0	0	0
D033461	0	0	0	0	0	0	0	0	0	0	0	0	0	0	0	0	0	0	0	0	0	0	0	0	0.115903	0	0	0	0	0	0	0	0	0	0	0	0	0	0	0	0	0	0	0	0	0	0	0	0
D012162	0	0	0	0	0	0	0	0	0	0.360384	0.300033	0	0.128371	0	0.141265	0	0	0	0.120486	0	0	0.340322	0	0	0	0	0	0	0	0	0	0	0	0.672601	0.151689	0	0	0	0	0	0	0	0	0	0	0	0	0	0
D007249	0	0	0	0	0	0.10954	0	0.109257	0.109965	0	0	0	0	0	0.109814	0	0	0.112001	0	0	0.175895	0	0	0.227756	0.153902	0.171256	0	0	0	0	0	0	0	0	0	0.192472	0	0.231964	0	0	0	0	0	0	0	0	0	0	0
D008209	0	0	0	0	0	0	0	0	0.205596	0	0	0	0	0	0	0	0	0	0	0	0	0	0	0.159011	0.107924	0	0	0	0	0	0	0	0	0	0.161551	0.156484	0	0	0	0	0	0	0	0	0	0	0	0	0
D003324	0	0	0	0	0	0.103018	0.16443	0	0	0	0	0	0	0	0	0	0	0	0	0	0	0	0	0	0	0	0.128529	0	0	0	0	0.792354	0	0	0	0	0	0	0	0	0	0.106098	0	0.599127	0.120103	0	0	0	0
D020774	0	0	0	0.292031	0	0	0	0	0	0	0	0	0	0	0	0	0	0	0	0	0.188543	0	0	0	0	0	0	0	0	0	0	0	0	0	0	0	0	0	0	0	0	0	0	0	0	0	0.540206	0	0
D019226	0	0	0	0	0	0.238218	0	0	0	0	0	0	0	0	0	0	0	0	0	0	0	0	0	0.166012	0.391268	0	0	0	0	0	0	0	0	0	0	0	0	0	0	0	0	0	0	0	0	0	0	0	0.270504
D005234	0	0	0	0	0	0	0	0.183153	0	0	0	0	0	0	0.160629	0	0	0	0	0	0	0	0	0.329215	0	0.332365	0	0	0	0	0	0	0	0	0	0	0	0	0	0	0	0	0	0	0	0	0	0	0
D003966	0	0	0	0	0	0	0	0	0	0.111412	0	0	0	0	0	0.168209	0	0	0	0	0	0.287338	0	0	0	0	0	0	0	0	0	0	0	0	0.131186	0.18178	0	0	0	0	0	0	0	0	0	0	0	0	0
D017088	0	0	0	0	0	0	0	0.199227	0	0	0	0	0	0	0	0	0	0	0	0	0	0	0	0.204993	0.383064	0	0	0	0	0	0	0	0	0	0	0	0.416179	0	0	0	0	0	0	0	0	0	0	0	0
D015785	0	0	0	0	0	0	0	0	0	0.315321	0.389756	0	0.338601	0	0.135789	0	0	0	0.166596	0	0	0.640027	0	0	0	0	0.102512	0	0	0	0	0	0	0.617225	0.320075	0.123655	0	0.112888	0	0	0.303764	0	0	0.100107	0	0	0	0	0
D001471	0	0	0	0	0	0	0	0	0	0	0	0	0	0	0	0	0	0	0	0	0	0	0	0.555003	0	0	0	0	0	0	0	0	0	0	0	0	0	0	0	0	0	0	0	0	0	0	0	0	0
D057066	0	0	0	0	0	0	0	0	0	0	0	0	0.153756	0	0	0	0	0	0	0	0	0	0	0	0	0	0	0	0	0	0	0	0	0.566667	0	0	0	0	0	0	0	0	0	0	0	0	0	0	0
D014927	0	0	0	0	0	0	0.279149	0	0	0	0	0	0	0	0	0	0	0	0	0	0	0	0	0	0	0	0	0	0	0	0	0	0	0	0	0	0	0	0	0	0	0	0	0	0	0	0	0	0
D006331	0	0	0	0	0	0.215988	0.6279	0	0	0	0	0	0	0	0	0	0	0.194688	0	0	0	0	0	0.175256	0.115299	0	0.188145	0.260818	0	0	0	0.591859	0	0	0.235353	0	0	0	0	0	0	0	0	0.882845	0.542859	0	0	0	0
D016715	0	0	0	0	0	0	0	0	0	0	0	0	0	0	0	0	0	0	0	0	0	0	0	0	0	0	0	0	0	0	0	0	0	0	0	0	0	0	0	0	0	0	0	0	0	0	0	0	0
D004749	0	0	0	0	0	0	0	0	0	0	0	0	0	0	0	0	0	0	0	0	0	0	0	0.162858	0.239315	0	0	0	0	0	0	0	0	0	0	0	0	0.201416	0	0	0	0	0	0	0	0	0	0	0
D003072	0	0	0	0.887207	0	0	0	0	0	0	0	0	0	0	0.394074	0	0	0	0	0	0.143843	0	0	0	0	0	0	0	0	0	0	0	0	0	0	0	0	0	0	0	0	0	0	0	0	0	0	0	0
D009503	0	0	0	0	0	0.21187	0	0	0	0	0	0	0	0	0	0	0	0	0	0	0	0	0	0	0.68381	0	0	0	0.243758	0	0	0	0	0	0	0	0.121486	0.583189	0	0	0	0	0	0	0	0	0	0	0
D016115	0	0	0	0	0	0	0	0	0	0	0	0	0	0	0.102784	0	0	0	0	0	0	0	0	0	0	0	0	0	0	0	0	0	0	0	0	0	0	0	0	0	0	0	0	0	0	0	0	0	0
D011655	0	0	0	0	0	0.400538	0.220068	0	0	0	0	0	0	0	0	0	0	0.372343	0	0	0	0	0	0.226524	0.191758	0	0	0.581958	0	0	0	0.289329	0	0	0.173945	0	0	0	0	0	0	0	0	0.307248	0	0	0	0	0
D008207	0	0	0	0	0	0.174439	0	0.178681	0.149292	0	0	0	0	0	0	0	0	0	0	0	0	0	0	0.361554	0.406337	0	0	0	0	0	0	0	0	0	0	0.175015	0	0	0	0	0	0	0	0	0	0	0	0	0
D009220	0	0	0	0	0	0.162432	0	0	0	0.104231	0	0	0	0	0	0.793001	0	0	0.161778	0	0	0	0.187824	0	0.228309	0	0.108613	0	0	0	0	0	0	0	0.206271	0.828127	0	0	0	0	0	0	0	0	0	0	0	0	0
D020217	0	0	0	0	0	0	0	0	0	0	0	0	0	0	0	0	0	0	0	0	0	0	0	0	0.112152	0	0	0	0	0	0	0	0	0	0.14939	0	0	0	0	0	0	0	0	0	0	0	0	0	0
D009902	0	0	0	0	0	0	0	0	0	0	0	0	0	0	0	0	0	0	0	0	0	0	0	0	0	0	0	0	0	0	0	0	0	0	0	0	0	0	0	0	0	0	0	0	0	0	0	0	0
D015459	0	0	0	0	0	0.174049	0	0.183856	0	0.134566	0	0.226402	0	0	0	0	0	0	0	0	0	0.123026	0	0.266966	0.478757	0	0	0	0	0	0	0	0	0	0	0	0.117778	0	0	0	0	0	0	0	0	0	0	0	0
D014591	0	0	0	0	0	0	0	0	0	0	0	0	0	0	0	0	0	0	0	0	0	0	0	0	0	0	0	0	0	0	0	0	0	0	0	0	0	0	0	0	0	0	0	0	0	0	0	0	0
D008206	0	0	0	0	0	0	0	0	0	0	0	0	0	0	0	0	0	0	0	0	0	0	0	0.149103	0.508188	0	0	0	0	0	0	0	0	0	0	0	0	0	0	0	0	0	0	0	0	0	0	0.172742	0
D052776	0	0	0	0	0	0.106873	0	0	0	0	0	0	0	0	0	0	0	0	0	0	0	0	0	0	0	0	0	0	0	0	0	0	0	0	0.122566	0	0	0	0	0	0	0	0	0	0	0	0	0	0
D014890	0	0	0	0	0	0	0	0	0	0	0	0	0	0	0	0	0	0	0	0	0	0	0	0	0	0	0	0	0	0	0	0	0	0	0	0	0	0	0	0	0	0	0	0	0	0	0	0	0
D012883	0	0	0	0	0	0.228305	0	0	0	0	0	0	0	0	0	0	0	0	0	0	0	0.1193	0	0.213149	0.40641	0	0	0	0	0	0	0	0	0	0.135529	0	0	0	0	0	0	0	0	0	0	0	0	0	0
D010014	0	0	0	0	0	0	0	0.134469	0	0	0	0	0	0	0	0	0	0	0	0	0	0.173566	0	0.154657	0.172442	0	0	0	0	0	0	0	0	0	0.238983	0.329401	0	0.154682	0	0	0	0	0	0	0	0	0	0	0
D014062	0	0	0	0	0	0.102411	0	0	0.168468	0	0	0	0	0	0	0	0	0	0	0	0	0	0	0.159878	0.308962	0	0	0	0	0	0	0	0	0	0	0.113847	0	0	0	0	0	0	0	0	0	0	0	0	0.58923
D018239	0	0	0	0	0	0.262356	0	0.35656	0	0	0	0	0	0	0	0	0	0	0	0	0	0	0	0.365861	0.458395	0	0	0.103429	0.112523	0	0	0	0	0	0	0	0	0	0	0	0	0	0	0	0	0	0	0.165783	0
D011595	0	0	0	0.303928	0	0	0	0	0	0	0	0	0	0	0.377672	0	0	0	0	0	0	0	0	0	0	0	0	0	0	0	0	0	0	0	0	0	0	0	0	0	0	0	0	0	0	0	0	0	0
D053098	0	0	0	0	0	0	0	0	0	0	0	0	0	0	0	0	0	0	0	0	0	0	0	0	0	0	0	0	0	0	0	0	0	0	0	0	0	0	0	0	0	0	0	0	0	0	0	0	0
D003384	0	0	0	0	0	0	0	0.201363	0	0	0	0	0	0	0	0	0	0	0	0	0	0	0	0.212604	0.455984	0	0	0	0	0	0	0.107865	0	0	0	0.282646	0	0	0	0	0	0	0	0	0	0	0	0	0
D001171	0	0	0	0	0	0.2927	0	0.178673	0	0.210997	0	0.127173	0	0	0.106966	0	0	0	0	0	0	0	0	0.197538	0.532123	0	0.163352	0	0	0	0	0	0	0.129528	0.221092	0.275987	0.160626	0	0	0.108358	0	0	0	0	0	0	0	0.17826	0
D013927	0	0	0	0	0	0.237808	0.152546	0.158895	0	0.101696	0	0	0	0	0	0	0.131976	0.160664	0	0	0	0	0	0.143244	0.227297	0	0.225359	0.165863	0	0	0	0.414514	0	0	0.124028	0.135819	0.112607	0	0	0	0	0	0	0.293189	0	0	0	0	0
D006059	0	0	0	0	0	0	0	0	0	0	0	0	0	0	0.212336	0	0	0	0	0	0	0	0	0	0.120275	0	0	0	0	0.640465	0	0	0	0	0.416034	0	0	0	0	0	0	0	0	0.137734	0	0	0	0	0
D000014	0	0	0	0	0	0	0	0	0	0	0	0	0	0	0.138927	0	0	0	0	0	0	0.192648	0	0.14425	0.157068	0	0	0	0	0.149697	0	0	0	0	0.181648	0	0	0	0	0	0.275621	0	0	0	0	0	0	0.1078	0
D015428	0	0	0	0	0	0	0	0	0	0	0	0	0	0	0	0	0	0.673414	0	0	0	0	0	0	0	0	0	0.610481	0	0	0	0.390746	0	0	0	0	0	0	0	0	0	0	0	0.171361	0	0	0	0	0
D009260	0	0	0	0	0.188813	0.135008	0	0	0.237567	0	0	0	0	0	0	0	0	0	0	0	0	0.18927	0	0	0.152513	0	0	0	0	0	0	0	0	0	0.165911	0.178197	0	0	0	0	0	0	0	0	0	0	0	0	0
D014648	0	0	0	0	0	0.229182	0	0	0.119476	0	0	0	0	0	0	0	0	0	0	0	0	0	0	0.153811	0.122268	0	0	0	0	0	0	0	0	0	0	0.152731	0	0	0	0	0	0	0	0	0	0	0	0	0
D014826	0	0	0	0	0	0	0	0	0	0	0	0	0	0	0	0	0	0	0	0	0	0	0	0	0	0	0	0	0	0	0	0	0	0	0	0	0	0	0	0	0	0	0	0	0	0	0	0	0
D006429	0	0	0	0	0	0	0	0	0	0	0	0	0	0	0	0	0	0	0	0	0	0	0	0	0	0	0	0	0	0	0	0	0	0	0	0	0	0	0	0	0	0	0	0	0	0	0	0	0
D055673	0	0	0	0.122632	0.396946	0	0	0	0	0	0	0	0	0	0.120512	0	0	0	0	0	0	0.44769	0	0	0	0	0	0	0	0	0	0	0	0	0.44039	0	0	0	0	0	0.445353	0	0	0	0	0	0	0	0
D003920	0	0	0	0	0	0	0	0.115156	0	0.144863	0	0	0	0	0.164074	0	0	0	0	0	0	0	0	0.300481	0	0.35588	0	0	0	0	0	0	0	0	0	0	0	0.26525	0	0.270134	0	0	0	0	0	0	0	0.121444	0
D006323	0	0	0	0	0.110122	0	0.132282	0	0	0	0	0	0	0	0	0	0	0.312367	0	0	0	0	0	0	0.146289	0	0.106961	0	0	0	0	0.180392	0	0	0	0	0	0	0	0	0	0	0	0	0	0	0	0	0
D005155	0	0	0	0	0	0	0	0	0	0	0	0	0	0	0	0	0	0	0	0	0	0	0	0	0.145605	0	0	0	0	0	0	0	0	0	0	0	0	0	0	0	0	0	0	0	0	0	0	0	0
D015464	0	0.149567	0	0	0	0.217724	0	0.204528	0.119755	0.26952	0.183595	0.168917	0	0	0.137398	0	0	0.245964	0	0	0	0.116277	0	0.292878	0.525703	0	0.261319	0.259444	0.236252	0	0	0.150182	0	0.244584	0.154617	0.218267	0.321269	0.33947	0	0	0	0.112394	0.24052	0	0	0.161848	0	0.153494	0
D004833	0	0	0	0.62729	0.638397	0	0	0	0	0	0	0	0	0	0.365028	0	0	0	0	0	0	0	0	0	0	0	0	0	0	0	0	0	0	0	0	0	0	0	0	0	0	0	0	0	0	0	0	0	0
D007248	0	0	0	0	0	0	0	0	0	0.147812	0	0	0	0	0.217679	0	0	0	0	0	0	0	0	0.246994	0.209377	0.374628	0	0	0	0.157255	0	0	0	0	0	0	0	0	0	0	0	0	0.151987	0	0	0	0	0.140679	0
D006977	0	0	0	0	0	0	0	0	0	0	0	0	0	0	0	0	0	0	0	0	0	0	0	0	0.139416	0.101166	0	0	0	0	0	0	0	0	0	0	0	0	0	0	0	0	0	0	0	0	0	0.109601	0
D003398	0	0	0	0	0	0	0	0	0	0.162689	0	0	0.22286	0	0.163593	0	0	0	0	0	0	0.779625	0.130556	0	0	0	0	0	0	0.117417	0	0	0	0.100679	0.687393	0.143401	0	0	0	0	0.766018	0	0	0.229474	0.111678	0	0	0	0
D017241	0	0	0	0	0	0	0	0	0	0	0	0	0	0	0	0	0	0	0	0	0	0	0	0	0	0	0	0	0	0	0	0	0	0	0	0	0	0	0	0	0	0	0	0	0	0	0	0	0
D017827	0	0	0	0.104357	0	0	0	0	0	0	0	0	0	0	0.203832	0.138037	0	0	0	0	0	0	0	0	0.100018	0	0	0	0	0	0	0	0	0	0	0.241151	0	0	0	0	0	0	0	0	0	0	0	0	0
D002769	0	0	0	0	0	0	0	0	0	0	0	0	0	0	0	0	0	0	0	0	0	0	0	0.33866	0.194287	0	0	0	0	0	0	0	0	0	0	0	0	0	0	0	0	0	0	0	0	0	0	0	0
D010518	0	0	0	0	0	0	0	0	0	0	0	0	0	0	0	0	0	0	0	0	0	0	0	0.110136	0.199974	0	0	0	0	0	0	0	0	0	0	0	0	0	0	0	0	0	0	0	0	0	0	0	0.426654
D007024	0	0	0	0	0	0	0.206097	0	0	0	0	0	0	0	0	0	0	0	0	0	0	0	0	0	0	0	0	0	0	0	0	0	0	0	0	0	0	0	0	0	0	0	0	0	0	0	0	0	0
D010049	0	0	0	0	0	0.321582	0	0.19211	0	0	0	0	0	0	0	0	0	0	0	0	0	0	0	0	0.128406	0.644925	0.117869	0	0	0.436312	0	0	0	0	0	0	0	0	0	0	0	0	0	0	0	0	0	0	0
D006344	0	0	0	0	0	0.167366	0.363926	0	0	0	0	0	0	0	0	0	0	0.537081	0	0	0	0	0	0.109481	0.101855	0	0	0.650468	0	0	0	0.231736	0	0	0.169125	0	0	0	0	0	0	0	0	0.33502	0	0	0	0	0
D006627	0	0	0	0	0	0	0	0	0	0	0	0	0	0	0	0	0	0	0	0	0	0.155718	0	0	0	0	0	0	0	0	0	0	0	0	0.155198	0	0	0	0	0	0	0	0	0	0	0	0	0	0
D008545	0	0.101584	0.212209	0	0	0.203749	0	0.200922	0.105819	0.373052	0.233358	0.256196	0.107568	0	0.130193	0	0.132963	0.199093	0.142969	0	0	0.146294	0	0.456819	0.659636	0	0.254502	0.207206	0.17647	0	0	0	0	0.383829	0.16433	0.185458	0.121685	0.299888	0	0	0	0.145419	0.20292	0	0	0.157986	0	0.175722	0.165943
D011668	0	0	0	0	0	0.320582	0	0	0	0	0	0	0	0	0	0	0	0	0	0	0	0	0	0.153739	0.120779	0	0	0	0	0	0	0	0	0	0	0	0	0	0	0	0	0	0	0.130708	0	0	0	0	0
D007680	0	0.122561	0	0	0	0.424682	0	0.317832	0	0.155703	0	0.352229	0	0	0.147668	0	0	0.177353	0	0	0	0.112965	0	0.41888	0.649876	0.130445	0.260061	0.173006	0.262772	0	0	0	0	0	0.24527	0.260858	0.161171	0.5005	0	0.204965	0.151818	0.192091	0	0	0	0	0	0.265347	0
D013684	0	0	0	0	0.135743	0.101345	0	0	0	0.227066	0	0	0	0.104889	0.101588	0	0	0	0	0	0	0	0.11482	0.127425	0.194375	0	0	0	0	0	0	0	0	0.30969	0	0	0	0	0	0	0	0	0	0	0	0	0	0	0
D009472	0	0	0	0.168769	0.682026	0	0	0	0	0.299079	0.262479	0	0	0.293741	0.287713	0	0	0	0	0	0	0	0	0	0.121413	0	0	0	0	0	0	0	0	0.388094	0	0.130182	0	0	0	0	0	0	0	0	0	0	0	0	0
D003316	0	0	0	0	0	0	0	0	0	0	0	0	0.268802	0	0	0	0	0.141006	0	0	0	0.155222	0	0	0	0	0	0	0	0	0	0	0	0	0	0	0	0	0	0	0	0	0	0	0	0	0	0	0
D007006	0	0	0	0	0.120274	0	0	0	0	0	0	0	0	0	0.113276	0	0	0	0	0	0	0	0	0	0	0.133224	0	0	0.115722	0.140765	0	0	0	0	0.220853	0	0	0	0	0	0	0	0	0	0	0	0	0	0
D002239	0	0	0	0	0	0	0	0	0	0	0	0	0	0	0.170668	0	0	0	0	0	0	0	0	0	0	0	0	0	0	0.107823	0	0	0.115013	0	0	0.126317	0	0	0	0	0	0	0	0	0	0	0	0	0
D001006	0	0	0	0	0	0	0	0	0	0	0	0	0	0	0	0	0	0	0	0	0	0.183189	0	0	0	0	0	0	0	0	0	0	0	0	0.128031	0	0	0	0	0	0	0	0	0	0	0	0	0	0
D017689	0	0	0	0	0	0	0	0	0	0	0	0	0	0	0.179958	0	0	0	0.10283	0	0	0.687277	0.280506	0	0	0	0	0	0.13744	0.117771	0	0	0	0	0.636975	0.155087	0	0	0	0	0.876675	0	0	0.229262	0	0	0	0	0
D020246	0	0	0	0	0.116467	0.443954	0	0.341828	0.136713	0.247579	0	0.401087	0	0	0.14495	0	0.270501	0.185904	0	0	0	0	0	0.344715	0.359232	0.207571	0.377253	0.195077	0.151759	0	0	0.127755	0	0	0.225485	0.223734	0.240338	0.407767	0	0	0	0.249289	0	0.114292	0.104844	0	0	0.18362	0
D015576	0	0	0	0	0	0	0	0	0	0	0	0	0	0	0	0.168028	0	0	0	0	0	0	0	0	0.191294	0	0	0	0	0	0	0	0	0	0	0	0	0	0	0	0	0	0	0	0	0	0	0	0
D003480	0	0	0	0	0	0.10687	0	0.132228	0	0.196523	0	0	0	0	0.19154	0	0	0	0	0	0	0	0	0.244402	0.105578	0.831758	0	0	0	0.338546	0	0	0	0	0	0	0	0.224311	0	0	0	0	0	0	0	0	0	0.139772	0
D007015	0	0	0	0	0	0	0	0	0	0	0	0	0	0	0.119628	0	0	0	0	0	0	0	0	0	0.164494	0	0	0	0	0	0	0	0	0	0.327162	0.224562	0	0	0	0	0	0	0	0	0	0	0	0.522925	0
D009849	0	0	0	0.148385	0	0	0	0	0	0	0	0	0	0.321483	0.142855	0.112742	0	0	0	0	0.494345	0	0	0	0	0	0	0	0	0	0	0	0	0	0	0	0	0	0	0	0	0	0	0	0	0	0	0	0
D016535	0	0	0	0	0	0.351228	0	0	0	0	0	0	0	0	0	0	0	0.117104	0	0	0	0	0	0.14748	0	0	0	0	0	0	0	0	0	0	0	0	0	0	0	0	0	0	0	0	0	0	0	0	0
D001650	0	0	0	0	0	0	0	0.774284	0	0	0	0	0	0	0	0	0	0	0	0	0	0	0	0	0.147328	0	0	0	0	0	0	0	0	0	0	0	0	0.314949	0	0	0	0	0	0	0	0	0	0	0
D017696	0	0	0	0	0	0	0	0	0	0	0	0	0	0	0	0.327239	0	0.138947	0	0	0.109336	0	0.311748	0	0	0	0	0.106494	0	0	0	0	0	0	0	0.438521	0	0	0	0	0	0	0	0	0	0	0	0	0
D019048	0	0	0	0	0	0	0	0	0	0	0	0	0	0	0	0	0	0	0	0	0	0	0	0	0	0	0	0	0	0	0	0	0	0	0.140258	0	0	0	0	0	0	0	0	0	0	0	0	0	0
D001766	0	0	0	0	0	0	0	0	0	0.195323	0.295971	0	0	0	0	0	0	0	0	0	0	0.200713	0	0	0	0	0	0	0	0	0	0	0	0.38929	0	0	0	0	0	0	0	0	0	0	0	0	0	0	0
D000437	0	0	0	0.441259	0.353922	0.111521	0	0.240036	0.142624	0.145629	0	0	0.163893	0	0.517891	0.167717	0	0	0	0	0	0.177138	0	0.198339	0.234623	0.101714	0	0	0	0.115573	0	0	0.196316	0.167651	0.18348	0.207211	0	0	0	0	0	0.108283	0.133923	0	0	0	0	0.178682	0
D008527	0	0	0	0.113369	0.110403	0	0	0	0.104167	0.255633	0	0.137786	0	0	0.181292	0	0	0	0	0	0.234301	0.272497	0	0.17237	0.323964	0	0.288858	0	0.104433	0	0	0	0	0	0.294178	0.129468	0	0.17511	0	0	0.172595	0.16021	0	0	0	0.161729	0	0	0
D012130	0	0	0	0	0	0	0	0	0	0	0	0	0	0	0	0	0	0	0	0	0	0	0	0.161097	0.131521	0	0	0.275539	0	0	0	0	0	0	0	0	0.122461	0	0	0	0	0	0	0	0	0	0	0	0
D054078	0	0	0	0	0	0	0	0	0	0	0	0	0	0	0	0	0	0	0	0	0	0	0	0	0	0	0	0	0	0	0	0	0	0	0	0	0	0	0	0	0	0	0	0	0	0	0	0	0
D020522	0	0	0	0	0	0	0	0	0	0	0	0	0	0	0	0	0	0	0	0	0	0	0	0	0	0	0	0	0	0	0	0	0	0	0	0	0	0	0	0	0	0	0	0	0	0	0	0	0
D003925	0	0	0	0	0	0	0	0	0	0	0	0	0	0	0	0	0	0	0	0	0	0	0	0	0	0	0	0	0	0	0	0.14987	0	0	0	0	0	0	0	0.918446	0	0	0	0	0	0	0	0	0
D011470	0	0	0	0	0	0	0	0	0	0	0	0	0	0	0	0	0	0	0	0	0	0	0	0	0	0	0	0	0	0	0	0	0	0	0	0	0	0	0	0	0	0	0	0	0	0	0	0	0
D014983	0	0	0	0	0.384289	0	0	0	0	0	0	0	0	0	0.155663	0	0	0	0	0	0	0	0	0	0	0	0	0	0	0.122171	0	0	0	0	0.728523	0.126377	0	0	0	0	0	0	0	0.239275	0	0	0	0	0
D018290	0	0	0	0	0	0	0	0	0	0	0	0	0	0	0	0	0	0	0	0	0	0	0	0	0	0	0	0	0	0	0	0	0	0	0.156372	0	0	0	0	0	0	0	0	0	0	0	0	0	0
D011507	0	0	0	0	0	0	0	0	0	0	0	0	0	0	0	0	0	0	0	0	0	0	0	0	0.125126	0	0	0	0	0	0	0	0	0	0	0	0	0	0	0.423535	0	0	0	0	0	0	0	0	0
D019969	0	0	0	0.754207	0	0	0	0	0	0	0	0	0	0	0.441556	0	0	0	0	0	0	0	0	0	0.177455	0	0	0	0	0	0	0	0	0	0	0	0	0	0	0	0	0	0	0	0	0	0	0	0
D006255	0	0	0	0	0	0	0	0	0	0	0	0	0	0	0	0	0	0	0	0	0	0	0	0	0	0	0	0	0	0	0	0	0	0	0	0	0	0	0	0	0	0	0	0	0	0	0	0	0
D006969	0	0	0	0	0	0	0	0	0	0	0	0	0	0	0	0	0	0	0	0	0	0	0	0	0	0	0	0.161274	0	0	0	0	0	0	0	0	0	0	0	0	0	0	0	0	0	0	0	0	0
D002006	0	0	0	0	0	0.340726	0	0	0	0.139682	0	0	0	0	0	0	0	0	0	0	0	0	0	0.143365	0.638295	0	0	0	0	0	0	0	0	0	0.192089	0.186334	0	0	0	0	0	0	0	0	0	0	0	0	0
D011625	0	0	0	0	0	0	0	0	0	0.498912	0	0	0	0	0	0	0	0	0	0	0	0	0	0	0.104226	0	0	0	0	0	0	0	0	0.333295	0	0.138849	0	0	0	0	0	0	0	0.130328	0	0.178575	0	0	0
D020786	0	0	0	0.105986	0	0	0	0	0	0	0	0	0	0	0.144269	0	0	0	0	0	0	0	0	0	0.153373	0	0	0	0	0	0	0	0	0	0	0.188895	0	0	0	0	0	0	0	0	0	0	0	0	0
D011629	0	0	0	0	0	0.11734	0	0	0	0.147824	0	0	0	0	0.175557	0	0	0	0	0	0	0	0	0.152247	0.118875	0	0	0	0	0.621646	0	0	0	0	0	0	0	0	0	0	0	0	0	0	0	0	0	0	0
D002311	0	0	0	0	0	0.160497	0.236852	0	0	0	0	0	0	0	0	0	0	0.139059	0	0	0	0	0	0.115652	0	0	0.153307	0.15594	0	0	0	0.410286	0	0	0.122302	0	0	0.1068	0	0	0	0	0.323877	0.518178	0	0	0	0	0
D005955	0	0	0	0	0	0	0	0	0	0	0	0	0	0	0.109941	0	0	0	0	0	0	0	0	0	0.148302	0	0	0	0	0	0	0	0	0	0	0	0	0	0	0	0	0	0	0	0	0	0	0	0
D009203	0	0	0	0	0	0	0.147185	0	0	0	0	0	0	0	0	0	0	0	0	0	0	0	0	0	0	0	0.11264	0	0	0	0	0.940106	0	0	0	0	0	0	0	0	0	0	0.135155	0.430115	0.132952	0	0	0	0
D013207	0	0	0	0	0	0	0	0	0	0	0	0	0	0	0	0	0	0	0	0	0	0	0	0	0.259124	0	0	0	0	0	0	0	0	0	0	0	0.138315	0	0	0	0	0	0	0	0	0	0	0	0
D002972	0	0	0	0	0	0	0	0	0	0	0	0	0	0	0	0	0	0	0	0	0	0.28022	0	0	0	0	0.136101	0	0	0	0	0	0	0	0.192471	0	0	0	0	0	0.200551	0	0	0	0	0	0	0	0
D020512	0	0	0	0	0	0	0	0	0	0	0	0	0	0	0	0	0	0	0	0	0	0	0.553605	0	0	0	0	0	0	0	0	0	0	0	0	0.477767	0	0	0	0	0	0	0	0	0	0	0	0	0
D014188	0	0	0	0	0	0	0	0	0	0	0	0	0	0	0	0	0	0	0	0	0	0	0	0	0	0	0	0	0	0	0	0	0	0	0.109626	0	0	0	0	0	0	0	0	0	0	0	0	0	0
D001424	0	0	0	0	0	0	0	0.213211	0	0	0	0	0	0	0	0	0	0	0	0	0	0	0	0.16798	0.630795	0	0	0	0	0	0	0	0	0	0	0	0.312065	0	0	0	0	0	0	0	0	0	0	0	0
D006259	0	0	0	0.268245	0.107191	0	0	0	0	0.346457	0	0	0	0	0.151104	0	0	0.139073	0	0	0	0.131389	0	0	0.171965	0	0	0.106569	0	0	0	0	0	0	0.14212	0	0	0	0	0	0	0	0	0	0	0	0	0	0
D009477	0	0	0	0	0	0.133697	0	0	0	0	0	0	0	0	0	0.644112	0	0	0	0	0.444776	0.450065	0.113828	0	0.147126	0	0.124293	0	0	0	0	0	0	0	0	0.5738	0	0	0	0	0.320772	0.217403	0	0.12731	0	0	0	0	0
D001859	0	0	0	0	0	0.26098	0	0.127258	0	0	0	0	0	0	0	0	0	0	0	0	0	0	0	0.165383	0.134679	0	0	0	0	0	0	0	0	0	0	0.290397	0	0	0	0.113772	0	0	0	0	0	0	0	0	0
D016891	0	0	0	0	0	0	0	0	0	0	0	0	0	0	0	0	0	0	0	0	0	0	0	0	0.152554	0	0	0	0	0	0	0	0	0	0	0	0	0	0	0.872883	0	0	0	0	0	0	0	0.10826	0
D001172	0	0.215805	0.23074	0	0	0.201184	0	0.184614	0	0.135705	0	0.194248	0	0	0.120846	0.143541	0.105797	0	0	0	0	0	0	0.327937	0.367098	0	0.205145	0.101602	0.149235	0	0	0	0	0	0.199522	0.421954	0.150186	0.264474	0	0.198085	0	0.317516	0.165403	0	0	0	0	0.234314	0.214596
D006311	0	0	0	0	0	0	0	0	0	0	0	0	0	0	0	0	0	0	0	0	0	0	0	0	0	0	0	0	0	0	0	0	0	0	0	0	0	0	0	0	0	0	0	0	0	0	0	0	0
D006228	0	0	0	0	0	0	0	0	0	0	0	0	0.115152	0	0.148025	0	0	0	0	0	0	0.857863	0.1209	0	0	0.101595	0.13462	0	0	0.12971	0	0	0.116179	0	0.631757	0.173975	0	0.173589	0	0	0.731377	0	0	0.215971	0.102981	0	0	0	0
D019957	0	0	0	0.271062	0	0	0	0	0	0	0	0	0	0	0.221653	0	0	0	0	0	0	0	0.139799	0	0	0	0	0	0	0	0	0	0	0	0	0.142118	0	0	0	0	0.318758	0	0	0	0	0	0	0	0
D013683	0	0	0	0	0	0.16053	0	0	0	0	0	0.133123	0	0	0	0	0	0.135674	0	0	0	0	0	0.158503	0.19372	0	0	0.187091	0	0	0	0	0	0	0.126027	0	0	0.123589	0	0	0	0	0	0.10388	0	0	0	0	0.253342
D007644	0	0	0	0	0	0	0	0	0.176736	0	0	0	0	0	0	0	0	0	0	0	0	0	0	0	0.105538	0	0	0	0	0	0	0	0	0	0.417032	0	0	0	0	0	0.459829	0	0	0	0	0	0	0.108271	0
D007640	0	0	0	0	0	0	0	0	0	0	0	0	0	0	0	0	0	0	0	0	0	0	0	0	0	0	0	0	0	0	0	0	0	0	0	0	0	0	0	0	0	0	0	0	0	0	0	0	0
D003123	0	0	0	0	0	0	0	0	0.749859	0	0	0	0	0	0	0	0	0	0	0	0	0.197279	0	0	0	0	0	0	0	0	0	0	0	0	0.177709	0	0	0	0	0	0	0	0	0	0	0	0	0	0
D009394	0	0	0	0	0	0	0	0	0	0	0	0	0	0	0	0	0	0	0	0	0	0	0	0	0.119351	0	0	0	0	0	0	0	0	0	0.180643	0	0	0	0	0.236239	0	0	0	0	0	0	0	0	0
D007239	0	0	0	0	0	0	0	0.204706	0	0	0	0	0	0	0	0	0	0	0	0	0	0	0	0.185329	0.703647	0	0	0	0	0	0	0	0	0	0	0	0	0	0	0	0	0	0	0	0	0	0	0.114734	0
D007898	0	0	0	0	0	0	0	0	0	0	0	0	0	0	0	0	0	0	0	0	0	0	0	0.17825	0	0	0	0	0	0	0	0	0	0	0	0	0	0	0	0	0	0	0	0	0	0	0	0	0
D020018	0	0	0	0	0	0	0	0	0	0	0	0	0	0	0.212054	0	0	0	0	0	0	0	0	0.158046	0.112802	0	0	0	0	0	0	0	0	0	0	0	0	0	0	0	0	0	0	0	0	0	0	0	0
D001851	0	0	0	0	0	0.10942	0	0	0	0.122363	0	0	0	0	0.216312	0.150153	0	0	0	0	0	0	0	0.270128	0.126108	0.137057	0	0	0	0	0	0	0	0	0.178929	0.225851	0	0	0	0.124405	0	0.122644	0	0	0	0	0	0.212423	0
D003409	0	0	0	0	0	0	0	0	0	0	0	0	0	0	0.16199	0	0	0	0	0	0	0.896017	0	0	0	0	0	0	0	0.122001	0	0	0.12042	0	0	0.132351	0	0	0	0	0	0	0	0.231304	0	0	0	0	0
D015663	0	0	0	0	0	0	0	0	0	0	0	0	0	0	0	0	0	0	0	0	0	0	0	0.173077	0	0	0.243317	0	0	0	0	0	0	0	0.189293	0.141861	0	0	0	0	0	0	0	0	0	0	0	0.126528	0
D001004	0	0	0	0	0	0	0	0	0	0	0	0	0	0	0	0	0	0	0	0	0	0	0	0	0	0	0	0	0	0	0	0	0	0	0	0	0	0	0	0	0	0	0	0	0	0	0	0	0
D012481	0	0	0	0	0	0	0	0	0	0	0	0	0	0	0	0	0	0	0	0	0	0	0	0	0.293554	0	0	0	0	0	0	0	0	0	0	0	0	0	0	0	0	0	0	0	0	0	0	0	0
D007246	0	0	0	0	0	0	0	0	0	0	0	0	0	0	0.178961	0	0	0	0	0	0	0	0	0.125468	0	0	0	0	0	0.109033	0	0	0	0	0	0	0	0	0	0	0	0	0	0	0	0	0	0	0
D005953	0	0	0	0	0	0	0	0	0	0	0	0	0	0	0	0	0	0	0	0	0	0	0	0	0.21399	0	0	0	0	0	0	0	0	0	0	0	0	0	0	0	0	0	0	0	0	0	0	0	0
D014605	0	0	0	0	0	0	0	0	0	0.544272	0	0	0.290477	0	0	0	0	0	0	0	0	0.372496	0	0	0.213153	0	0.208691	0	0	0	0	0	0	0.659752	0.186276	0	0	0	0	0	0	0	0	0	0	0.261636	0	0	0
D005902	0	0	0	0	0	0	0	0	0	0.644359	0.332939	0	0.195623	0	0	0	0	0	0	0	0	0	0	0	0	0	0	0	0	0	0	0	0	0.684764	0	0	0	0	0	0	0	0	0	0	0	0	0	0	0
D020022	0	0	0	0.327484	0.163779	0	0	0	0	0.108318	0	0	0	0	0.315668	0.160024	0	0	0	0	0.285247	0	0	0.168443	0.116531	0.175945	0.108636	0	0	0	0	0	0	0	0.233695	0.236814	0	0	0	0	0	0	0	0	0	0	0	0	0
D056587	0	0	0	0	0	0	0	0	0	0	0	0	0	0	0	0	0	0	0	0	0	0	0	0	0.235372	0	0	0	0	0	0	0	0	0	0	0	0	0	0	0	0	0	0	0	0	0	0	0	0
D001037	0	0	0	0.155108	0	0	0	0	0	0	0	0	0	0	0	0	0	0	0	0	0	0	0	0	0	0	0	0	0	0	0	0	0	0	0	0	0	0	0	0	0	0	0	0	0	0	0	0	0
D013991	0	0	0	0	0	0	0.2292	0	0	0	0	0	0	0	0	0	0	0	0	0	0	0	0	0.133339	0	0	0	0	0	0	0	0	0	0	0	0	0	0	0	0	0	0	0	0.119169	0	0	0	0	0
D019964	0	0	0	0.513308	0.117966	0	0	0	0	0	0	0	0	0	0.698704	0	0	0	0	0	0	0.192329	0	0.121271	0.114299	0	0	0	0	0	0	0	0.219777	0	0	0.14425	0	0	0	0	0.263691	0	0	0	0	0	0	0.130694	0
D052159	0	0	0	0	0	0	0	0	0	0	0	0	0	0	0	0	0	0	0	0	0	0	0	0	0	0	0	0	0	0	0	0	0	0	0	0	0	0	0	0	0	0	0	0	0	0	0	0	0
D004829	0	0	0	0.153032	0.881602	0	0	0	0	0	0	0	0	0.201036	0.325365	0	0	0	0	0	0	0	0.101779	0	0.122411	0	0	0	0	0	0	0	0.192282	0	0	0.120633	0	0	0	0	0	0	0	0.134297	0	0	0	0.139653	0
D008106	0	0	0	0	0	0	0	0.128862	0	0	0	0	0	0	0.144228	0	0	0.155365	0	0	0	0	0	0.202083	0	0	0	0.154156	0	0	0	0	0	0	0	0	0	0.277526	0	0	0	0	0.142653	0	0	0	0	0	0
D052439	0	0	0	0	0	0	0	0.125067	0	0	0	0	0	0	0.206216	0	0	0.111383	0	0	0	0	0	0.327838	0	0.301711	0	0.110535	0	0	0	0	0	0	0	0	0	0	0	0	0	0	0	0	0	0	0	0	0
D019956	0	0	0	0.102479	0	0	0	0	0	0	0	0	0	0	0.310339	0	0	0	0	0	0	0	0	0	0	0	0	0	0	0	0	0	0	0	0.592177	0.103553	0	0	0	0	0	0	0	0.210681	0	0	0	0	0
D020967	0	0	0	0	0	0	0	0	0	0	0	0	0	0	0	0	0	0	0	0	0	0	0	0	0	0	0	0	0	0	0	0	0	0	0	0	0	0	0	0	0	0	0	0	0	0	0	0	0
D006946	0	0	0	0	0	0	0	0.114884	0	0.144375	0	0	0	0	0.168676	0	0	0	0	0	0	0	0	0.295047	0	0.431882	0	0	0	0	0	0	0	0	0	0	0	0	0	0	0	0	0	0	0	0	0	0.116841	0
D006956	0	0	0	0	0	0	0	0	0	0	0.218228	0	0	0	0	0	0	0	0	0	0	0	0	0	0	0	0	0	0	0	0	0	0	0	0	0	0	0	0	0	0	0	0	0	0	0	0	0	0
D008844	0	0	0	0	0	0	0	0	0	0	0	0	0	0	0.18956	0	0	0	0	0	0	0.593041	0	0	0	0	0	0	0	0	0	0	0	0	0	0	0	0	0	0	0.621575	0	0	0	0	0	0	0	0
D001064	0	0	0	0	0	0	0	0	0	0	0	0	0	0	0	0	0	0	0	0	0	0	0	0	0.190208	0	0	0	0	0	0	0	0	0	0	0	0	0	0	0	0	0	0	0	0	0	0	0	0
D006685	0	0	0	0	0	0.405601	0	0	0	0	0	0	0	0	0	0	0	0	0	0	0	0	0	0	0	0	0	0	0	0	0	0	0	0	0	0	0	0	0	0	0	0	0	0	0	0	0	0	0
D012216	0	0	0	0	0	0	0	0	0	0	0	0	0	0	0	0	0	0	0	0	0	0	0	0	0.214545	0	0	0	0	0	0	0	0	0	0	0	0	0	0	0	0	0	0	0	0	0	0	0	0
D020391	0	0	0	0	0	0	0	0	0	0	0	0	0	0	0	0.564587	0	0	0	0	0.138181	0.19972	0.168752	0	0	0	0	0	0	0	0	0	0	0	0.262911	0.652373	0	0.126652	0	0	0	0.370678	0	0	0	0	0	0.116373	0
D009410	0	0	0	0.578784	0.308023	0	0	0	0	0	0	0	0	0	0.227164	0.112183	0	0.151258	0	0	0	0	0	0	0	0	0	0.119801	0	0	0	0	0.131089	0	0	0.133579	0	0	0	0	0	0	0.113163	0	0	0.245086	0	0	0
D009136	0	0	0	0	0.16869	0	0	0	0	0	0.110242	0	0	0	0.103217	0.792201	0	0.114503	0.140466	0	0.229729	0.354055	0.155314	0	0	0	0	0.1144	0	0	0	0	0	0	0.42689	0.816695	0	0	0	0	0	0	0	0.124449	0	0	0	0.110953	0
D011371	0	0	0	0	0	0	0	0	0	0	0	0	0	0	0	0	0	0	0	0	0	0.13082	0	0	0	0	0	0	0	0	0	0	0	0	0.123928	0	0	0	0	0	0.16117	0	0	0	0	0	0	0	0
D007805	0	0	0	0	0	0	0	0	0	0	0	0	0	0	0	0	0	0	0	0	0	0	0	0	0	0	0	0	0	0	0	0	0	0	0	0	0	0	0	0	0	0	0	0	0	0	0	0	0
D005494	0	0	0	0.1292	0	0	0	0	0	0	0	0	0	0	0	0	0	0	0	0	0.143283	0	0.220872	0.151415	0.191172	0	0	0	0	0	0	0	0	0	0.387323	0	0	0	0	0	0	0	0	0	0	0	0	0	0
D001778	0	0	0	0	0	0	0	0	0.126732	0	0	0	0	0	0	0	0.151862	0.136348	0	0	0	0	0	0.100666	0.28365	0	0	0.10336	0	0	0	0.135542	0	0	0	0	0	0	0	0	0	0	0	0	0	0	0	0	0.485957
D006712	0	0	0	0	0.543216	0	0	0	0	0	0	0	0	0.109762	0.179417	0	0	0	0	0	0	0	0	0	0.100304	0	0	0	0	0	0	0	0	0	0.682614	0	0	0	0	0	0	0	0	0	0	0	0	0	0
D001932	0	0.111931	0	0.310908	0.475117	0.105206	0	0	0.166679	0.540905	0.111667	0	0	0	0.234821	0	0	0.100376	0	0	0.138067	0.223603	0	0.150194	0.283038	0	0.289009	0	0	0	0	0	0.124165	0.206056	0.271804	0.229813	0	0.151056	0	0	0	0.219147	0	0	0	0.442595	0	0.160683	0.254527
D018805	0	0	0	0	0	0.202983	0	0.281134	0.142447	0	0	0	0	0	0	0.104253	0.152047	0.269976	0	0	0	0	0	0.154864	0.595473	0	0.114842	0.219542	0.274021	0	0	0	0	0	0	0.156564	0.12018	0.574722	0	0	0	0	0.20474	0	0	0	0	0.125049	0
D012279	0	0	0	0	0.27292	0	0	0	0	0	0	0	0	0	0	0	0	0	0	0	0	0	0	0	0	0	0	0	0	0	0	0	0	0	0.14377	0	0	0	0	0	0	0	0	0	0	0	0	0.869083	0
D003109	0	0	0	0	0	0	0	0	0	0	0	0	0	0	0	0	0	0	0	0	0	0	0	0.17899	0.132175	0	0	0	0	0	0	0	0	0	0	0	0	0	0	0	0	0	0	0	0	0	0	0	0
D009293	0	0	0	0	0	0	0	0.117491	0	0	0	0	0	0	0.131153	0	0	0	0	0	0	0	0	0.146888	0	0	0	0	0	0	0	0	0	0	0	0.280724	0	0	0	0	0	0	0	0	0	0	0	0.119526	0
D001169	0	0.111527	0	0	0	0	0	0	0.138158	0	0	0	0	0	0	0	0	0	0	0	0	0	0	0.105905	0	0	0	0	0	0	0	0	0	0	0	0.17856	0	0.102973	0	0	0	0	0.17918	0	0	0	0	0	0
D009069	0	0	0	0.155691	0.129554	0	0	0	0	0	0	0	0	0.292178	0.254446	0.140577	0	0	0	0	0	0	0	0	0	0	0	0	0	0	0	0	0.615534	0	0	0.263544	0	0	0	0	0	0	0	0	0	0.326718	0	0.104139	0
D007011	0	0	0	0	0.225559	0	0.101984	0	0	0	0	0	0	0	0	0	0	0	0	0	0	0	0	0	0	0	0	0	0	0	0	0	0	0	0.121859	0	0	0	0	0	0	0	0	0	0	0	0	0.846416	0
D016757	0	0	0	0	0	0.145216	0.2474	0	0	0	0	0	0	0	0	0	0	0	0	0	0	0	0	0	0	0	0	0	0	0	0	0.357156	0	0	0.100223	0	0	0	0	0	0	0	0	0.546777	0	0	0	0	0
D000022	0	0	0	0	0	0	0	0	0	0	0	0	0	0	0.152176	0	0	0	0	0	0	0.113565	0	0.173499	0.301852	0	0	0	0	0	0	0	0	0	0	0	0	0	0	0	0.281587	0	0	0	0	0	0	0.105917	0
D006012	0	0	0	0	0	0	0	0	0	0	0	0	0	0	0	0.109931	0	0	0	0	0	0	0	0	0.159843	0	0	0	0	0	0	0	0	0	0	0.439467	0	0	0	0	0	0	0	0	0	0	0	0	0
D020138	0	0	0	0.423648	0	0.143371	0	0	0	0.213754	0	0	0	0	0.228471	0	0	0	0	0	0	0	0	0.180504	0.151805	0.15166	0.141627	0	0	0	0	0.284186	0	0	0.134614	0	0	0.172575	0	0.286047	0	0	0	0.103821	0	0	0	0.102998	0
D000853	0	0	0	0	0	0	0	0	0	0	0	0	0	0	0	0	0	0	0	0	0	0.756571	0	0	0	0	0	0	0	0	0	0	0	0	0	0	0	0	0	0	0	0	0	0	0	0	0	0	0
D009190	0	0	0	0	0	0.178843	0	0.10884	0	0	0	0.128183	0	0	0	0	0	0	0	0	0	0	0	0.216827	0.487532	0	0	0	0.166047	0	0	0	0	0	0.13562	0.105117	0.735949	0.347947	0	0	0	0	0	0	0	0	0	0.139052	0
D014550	0	0	0	0	0	0	0	0	0	0	0	0	0	0	0	0	0	0	0	0	0	0	0	0	0	0	0	0	0	0	0	0	0	0	0	0	0	0	0	0	0	0	0	0	0	0	0	0	0
D014860	0	0	0	0	0	0	0	0	0	0	0	0	0	0	0.134803	0	0	0	0	0	0	0	0	0.166436	0.257959	0	0.23245	0	0	0	0	0	0	0	0	0.194298	0	0	0	0	0	0	0.107406	0	0	0	0	0.135152	0
D002292	0	0	0.181013	0	0	0.330972	0	0.282065	0	0.149248	0	0.238008	0	0	0.150958	0	0.149931	0.266777	0	0	0	0	0	0.479105	0.596062	0.150784	0.220947	0.284963	0.286164	0	0	0	0	0	0.14293	0.237022	0.203759	0.386159	0	0.117917	0	0.178701	0.212264	0	0	0	0	0.234389	0
D006432	0	0	0	0	0	0.191858	0	0.30933	0	0.120259	0	0.243206	0	0	0	0	0	0.112835	0	0	0	0	0	0.184797	0.24736	0.121251	0	0.132431	0	0.100354	0	0	0	0	0.15121	0.172646	0.117973	0.342001	0	0	0	0	0	0.138235	0	0	0	0.405409	0
D012021	0	0	0	0	0	0	0	0	0	0	0	0	0	0	0	0	0	0	0	0	0	0	0	0	0	0	0	0	0	0	0	0	0	0	0	0	0	0	0	0	0	0	0	0	0	0	0	0	0
D056784	0	0	0	0.167193	0	0	0	0	0	0	0	0	0	0	0.173468	0	0	0	0	0	0.417319	0	0	0	0	0	0	0	0	0	0	0	0.14951	0	0	0	0	0	0	0	0	0	0	0	0	0	0	0	0
D010381	0	0	0	0	0	0	0	0	0	0	0	0	0	0	0	0	0	0	0	0	0	0	0	0	0.380826	0	0	0	0	0	0	0	0	0	0	0	0	0	0	0	0	0	0	0	0	0	0	0	0
D007889	0	0	0	0	0	0.402694	0	0.175999	0	0	0	0.430521	0	0	0	0	0	0	0	0	0	0	0	0.272932	0.199296	0.109448	0.177768	0	0	0.106589	0	0	0	0	0	0.156821	0	0	0	0	0	0.105998	0	0	0	0	0	0.117235	0
D020279	0	0	0	0	0	0	0	0	0	0	0	0	0	0	0.106074	0	0	0	0	0	0.48776	0	0.196543	0	0	0	0	0	0	0	0	0	0	0	0	0.125943	0	0	0	0	0	0	0	0	0	0	0	0	0
D020271	0	0	0	0.145549	0	0	0	0	0	0	0	0	0	0	0.118501	0.216953	0	0	0	0	0.666581	0	0	0	0	0	0	0	0	0	0	0	0.236222	0	0	0	0	0	0	0	0	0	0	0	0	0	0	0	0
D001260	0	0	0	0	0	0	0	0	0	0	0	0	0	0.127018	0.127191	0.164163	0	0	0	0	0	0.244847	0	0	0.107795	0	0	0	0	0	0	0	0	0	0.349841	0.173789	0	0.137386	0	0	0	0	0	0	0	0	0	0	0
D004476	0	0	0	0	0.345243	0.142245	0	0	0	0	0	0	0	0	0.15171	0	0	0	0	0	0	0.775174	0.172597	0	0.255587	0	0.117965	0	0.113779	0.110834	0.276989	0	0.115167	0	0.630599	0.131621	0	0.355536	0	0	0.714346	0	0	0.207821	0.114562	0	0	0.145922	0
D009133	0	0	0	0	0	0	0	0	0	0	0	0	0	0	0	0.975521	0	0	0	0	0.270374	0	0	0	0	0	0	0	0	0	0	0	0	0	0.147628	0.665056	0	0	0	0	0	0.219023	0	0	0	0	0	0	0
D015618	0	0	0	0	0	0	0	0	0	0	0	0	0	0	0	0	0	0	0	0	0	0	0	0	0	0	0	0	0	0	0	0	0	0	0	0	0	0	0	0	0	0	0	0	0	0	0	0	0
D019457	0	0	0	0	0	0	0	0	0	0	0	0	0	0	0	0	0	0	0	0	0	0.76645	0	0	0	0	0	0	0	0	0	0	0	0	0.673648	0	0	0	0	0	0.813486	0	0	0.246322	0	0	0	0	0
D005645	0	0	0	0	0	0	0	0	0	0	0	0	0	0	0	0	0	0	0	0	0	0	0	0	0	0	0	0	0	0	0	0	0	0	0	0	0	0	0	0	0	0	0	0	0	0	0	0	0
D008072	0	0	0	0	0	0	0	0	0	0	0	0	0	0	0	0	0	0	0	0	0	0	0	0	0	0	0	0	0	0	0	0	0	0	0	0	0	0	0	0	0	0	0	0	0	0	0	0	0
D017599	0	0	0	0	0	0	0.114395	0	0	0	0	0	0	0	0	0	0	0	0	0	0	0	0	0	0	0	0	0.164986	0	0	0	0.109161	0	0	0.150573	0.104034	0	0	0	0	0	0.115385	0	0	0	0	0	0	0
D005621	0	0	0	0	0	0	0	0	0	0	0	0	0	0	0	0	0	0	0	0	0	0	0	0	0	0	0	0	0	0	0	0	0	0	0	0.394934	0	0	0	0	0	0	0	0	0	0	0	0	0
D054058	0	0	0	0	0	0	0	0	0	0	0	0	0	0	0	0	0	0	0	0	0	0	0	0	0	0	0	0	0	0	0	0	0	0	0	0	0	0	0	0	0	0	0	0	0	0	0	0	0
D013163	0	0	0	0	0	0.29556	0	0.558192	0	0	0	0	0	0	0	0	0.217823	0	0	0	0	0	0	0.217811	0.607814	0	0	0	0	0	0	0	0	0	0.121099	0.11715	0.204505	0	0	0	0	0	0	0	0	0	0	0.129676	0
D004681	0	0	0	0	0	0	0	0	0	0	0	0	0	0	0	0	0	0	0	0	0	0	0	0.184214	0.140851	0	0	0	0	0	0	0	0	0	0	0.191541	0	0	0	0	0	0	0	0	0	0	0	0	0
D014545	0	0	0	0	0	0	0	0	0	0	0	0	0	0	0	0	0	0	0	0	0	0	0	0	0.125442	0	0	0	0	0	0	0	0	0	0	0	0	0	0	0	0	0	0	0	0	0	0	0	0
D003410	0	0	0	0	0	0	0	0	0	0	0	0	0	0	0.168345	0	0	0	0	0	0	0	0	0	0	0	0	0	0	0	0	0	0	0	0.630929	0	0	0.137608	0	0	0	0	0	0.222883	0	0	0	0	0
D018256	0	0	0	0	0	0	0	0	0	0	0	0	0	0	0	0	0	0	0	0	0	0	0	0	0	0	0	0	0	0	0	0	0	0	0	0	0	0	0	0	0	0	0	0	0	0	0	0	0
D001763	0	0	0	0	0	0	0	0	0	0	0	0	0	0	0	0	0	0	0	0	0	0	0	0	0	0	0	0	0	0	0	0	0	0	0	0	0	0	0	0	0	0	0	0	0	0	0	0	0
D006042	0	0	0	0	0	0	0	0	0	0	0	0	0	0	0	0	0	0	0	0	0	0	0	0	0	0	0	0	0	0	0	0	0	0	0	0	0	0	0	0	0	0	0	0	0	0	0	0	0
D005879	0	0	0	0	0	0	0	0	0	0	0	0	0	0	0	0	0	0	0	0	0	0	0	0	0	0	0	0	0	0	0	0	0.142716	0	0	0	0	0	0	0	0	0	0	0	0	0	0	0	0
D054556	0	0	0	0	0	0	0	0	0	0	0	0	0	0	0.13278	0	0	0	0	0	0	0	0	0.20828	0.124951	0	0	0	0	0	0	0	0	0	0	0	0	0	0	0.104263	0	0	0	0	0	0	0	0	0
D008591	0	0	0	0	0	0	0	0	0	0	0	0	0	0	0	0	0	0	0	0	0	0	0	0	0	0	0	0	0	0	0	0	0	0	0	0	0	0	0	0	0	0	0	0	0	0	0	0	0
D010300	0	0	0	0.26183	0	0	0	0	0	0	0	0	0	0	0.300664	0	0	0	0.245087	0	0.219313	0	0	0	0	0	0	0	0	0	0	0	0.411514	0	0	0.100995	0	0	0	0	0	0	0	0	0	0	0.549198	0	0
D002754	0	0	0	0	0	0	0	0	0	0	0	0	0	0	0.129043	0	0	0	0	0	0	0	0.166791	0	0	0	0	0	0	0	0	0	0	0	0.509372	0	0	0	0	0	0	0	0	0	0	0	0	0	0
D004413	0	0	0	0	0	0	0	0	0	0	0	0	0	0	0	0	0	0	0	0	0	0.52164	0	0	0	0	0	0	0	0	0	0	0	0	0	0	0	0	0	0	0	0	0	0.187823	0	0	0	0	0
D002056	0	0	0	0	0	0	0	0	0	0	0	0	0	0	0.175158	0	0	0	0	0	0	0	0	0.222675	0.210659	0	0	0	0	0	0	0	0	0	0	0.290355	0	0	0	0.122095	0	0	0	0	0	0	0	0.179394	0
D004828	0	0	0	0.213726	0.812969	0	0	0	0	0	0	0	0	0	0.311963	0	0	0	0.215743	0	0	0	0	0	0.140609	0	0	0	0	0	0	0	0	0	0	0.110931	0	0	0	0	0	0	0	0	0	0	0	0	0
D008107	0	0	0	0	0	0.123882	0	0.823494	0	0	0	0	0	0	0	0	0.138096	0.142	0	0	0	0	0	0.167311	0.257756	0.101735	0	0.134917	0	0	0	0	0	0	0	0	0	0.725547	0	0	0	0	0.150186	0	0	0	0	0.137337	0
D007003	0	0	0	0	0.44803	0	0	0	0.128383	0.103629	0	0	0	0	0.198141	0	0	0.223838	0	0	0	0.121165	0	0.142021	0.214276	0.120333	0	0.184775	0	0	0	0.123992	0	0	0.121989	0.110817	0	0	0	0	0	0	0	0.118107	0	0	0	0.16878	0
D007715	0	0	0	0	0	0.15346	0	0	0	0.100066	0	0	0	0	0	0	0	0	0	0	0	0	0	0	0.193446	0	0	0.108936	0	0	0	0	0	0	0	0.114967	0	0	0	0	0	0	0	0.103951	0	0	0	0	0.378551
D046248	0	0	0	0	0	0	0	0	0	0	0	0	0	0	0	0	0	0	0	0	0	0	0	0	0	0	0	0	0	0	0	0	0	0	0	0	0	0	0	0	0	0	0	0	0	0	0	0	0
D002780	0	0	0	0	0	0	0	0.308435	0	0	0	0	0	0	0	0	0	0	0	0	0	0	0	0	0	0	0	0	0	0	0	0	0	0	0	0	0	0	0	0	0	0	0	0	0	0	0	0.136357	0
D057180	0	0	0	0.306659	0	0	0	0	0	0	0	0	0	0	0	0	0	0	0	0	0.194418	0	0	0	0	0	0	0	0	0	0	0	0	0	0	0	0	0	0	0	0	0	0	0	0	0	0.50771	0	0
D000326	0	0	0	0	0	0	0	0	0	0	0	0	0	0	0.148561	0	0	0	0	0	0	0	0.111714	0	0.149588	0	0.102361	0	0	0	0	0	0	0.261035	0	0.145926	0	0	0	0	0	0	0	0	0	0	0	0	0
D017681	0	0	0	0	0	0	0.107157	0	0	0	0	0	0	0	0	0	0	0	0	0	0	0	0	0.257054	0.469787	0	0	0.240756	0	0	0	0	0	0	0	0.117827	0	0	0	0	0	0.153819	0	0	0	0	0	0	0
D017674	0	0	0	0	0	0	0	0	0	0	0	0	0	0	0	0.214212	0	0	0	0	0	0	0	0.224598	0.208828	0	0	0	0	0	0	0	0	0	0	0.317239	0	0	0	0	0	0	0	0	0	0	0	0	0
D016649	0	0	0	0.108108	0.182929	0	0	0	0	0	0	0	0	0	0.229071	0	0	0	0	0	0	0.453354	0	0	0.128538	0.339228	0.138731	0	0	0.572656	0	0	0	0	0.403355	0	0	0.187978	0	0	0	0	0	0.133329	0	0	0	0.123129	0
D015175	0	0	0	0	0	0	0	0	0	0	0	0	0	0	0	0	0	0	0	0	0	0.111241	0	0	0.141872	0	0	0	0	0	0	0	0	0.225325	0.139307	0	0	0	0	0	0	0	0	0	0	0	0	0	0
D005097	0	0.291918	0	0	0	0	0	0	0	0	0	0	0.1218	0	0.170601	0	0	0	0	0	0	0.734808	0	0	0.100414	0	0	0	0	0.115167	0	0	0.131858	0	0.645769	0.167314	0	0	0	0	0	0	0.125605	0.231106	0	0	0	0	0
D018211	0	0	0	0	0	0.40325	0	0	0	0	0	0	0	0	0	0	0	0	0	0	0	0	0	0	0	0	0.331095	0	0	0	0	0	0	0	0	0	0	0	0	0	0	0	0	0	0	0	0	0	0
D012509	0	0.11792	0	0	0	0.372189	0.178906	0.273415	0	0	0	0.316984	0	0	0	0	0	0.213754	0	0	0	0	0	0.510029	0.625734	0	0.226511	0.315368	0.272159	0	0	0	0	0	0.163846	0.170135	0.1244	0.34236	0	0	0	0.179135	0.263792	0.157406	0.20597	0	0	0.153665	0
D005596	0	0	0	0	0	0	0	0	0	0	0	0	0	0.127764	0	0.115038	0	0	0	0	0	0	0	0.171634	0.235564	0	0	0	0	0	0	0	0	0	0.115026	0	0	0	0	0	0	0	0	0	0	0	0	0	0
D019190	0	0	0	0.102964	0	0	0	0	0	0.134944	0	0	0	0	0.251889	0.204146	0	0	0	0	0	0	0	0.230769	0.162956	0	0	0	0	0	0	0	0	0	0	0.216008	0	0	0	0	0	0	0	0	0	0	0	0	0
D005923	0	0	0	0	0	0	0	0	0	0	0	0	0	0	0	0	0	0	0	0	0	0	0	0	0.131832	0	0	0	0	0	0	0	0	0	0	0	0	0	0	0.421769	0	0	0	0	0	0	0	0	0
D007571	0	0	0	0	0	0	0	0	0	0	0	0	0	0	0	0	0	0	0	0	0	0	0	0	0	0	0	0	0	0	0	0	0	0	0	0	0	0	0	0	0	0	0	0	0	0	0	0	0
D011225	0	0	0	0	0	0	0	0	0	0	0	0	0	0	0	0	0	0	0	0	0	0	0	0	0.182867	0	0	0	0	0	0	0	0	0	0	0	0	0	0	0.382456	0	0	0	0	0	0	0	0	0
D003329	0	0	0	0	0	0	0.135405	0	0	0	0	0	0	0	0	0	0	0	0	0	0	0	0	0	0	0	0	0	0	0	0	0.329156	0	0	0	0	0	0	0	0	0	0	0	0.289721	0	0	0	0	0
D000152	0	0	0	0	0	0	0	0	0	0	0	0	0	0	0	0	0	0	0	0	0	0	0	0	0	0	0	0	0	0.183973	0	0	0	0	0	0	0	0	0	0	0	0	0	0	0	0	0	0	0
D007938	0	0	0	0	0	0.252157	0	0.213111	0.107918	0	0	0.185066	0	0	0	0	0.114477	0	0	0	0	0	0	0.258385	0.850886	0	0.119991	0	0.253074	0	0	0	0	0	0.191214	0.121361	0.192464	0.564462	0	0	0	0	0	0	0	0.122376	0	0.169767	0.280591
D017114	0	0	0	0	0	0.170354	0	0.698764	0	0	0	0	0	0	0	0	0	0.10356	0	0	0	0	0	0.137652	0.362724	0	0.149806	0	0	0	0	0	0	0	0	0	0.107717	0	0	0	0	0	0.15813	0	0	0	0	0	0
D010438	0	0	0	0	0	0	0	0	0	0	0	0	0	0	0	0	0.931482	0	0	0	0	0	0	0.514574	0	0	0	0	0	0	0	0	0	0	0	0	0	0	0	0	0	0	0	0	0	0	0	0	0
D017180	0	0	0	0	0	0.124827	0.228998	0	0	0	0	0	0	0	0	0	0	0	0	0	0	0	0	0	0	0	0	0	0	0	0	0.109623	0	0	0	0	0	0	0	0	0	0	0	0	0	0	0	0	0
D000751	0	0	0	0	0	0	0	0	0	0	0	0	0	0	0	0	0	0	0	0	0	0	0	0	0	0	0	0	0	0	0	0	0	0	0	0	0	0	0	0	0	0	0	0	0	0	0	0	0
D018248	0	0	0	0	0	0.285331	0	0	0	0	0	0	0	0	0.162233	0	0	0	0	0	0	0	0	0.253554	0.129226	0	0	0	0	0	0	0	0	0	0	0	0	0	0	0	0	0	0	0	0	0	0	0	0
D018281	0	0	0	0	0	0	0	0.656219	0	0	0	0.275671	0	0	0	0	0	0	0	0	0	0	0	0	0.157193	0	0.11533	0	0	0	0	0	0	0	0	0	0	0.209015	0	0	0	0	0	0	0	0	0	0	0
D016609	0	0.375766	0	0	0.131129	0.254762	0	0.167727	0	0.265241	0.102578	0.223416	0	0.11364	0.128952	0	0	0	0.127026	0	0	0.17516	0	0.3235	0.250559	0.367928	0	0.125852	0.169191	0.381364	0	0	0	0.111675	0.184599	0.167774	0	0.221171	0	0	0.137527	0.2062	0.133556	0	0	0	0	0.137642	0
D003483	0	0	0	0	0	0	0	0	0	0	0	0	0	0	0	0	0	0	0	0	0	0.439535	0.172781	0	0	0	0	0	0	0	0	0	0	0	0.438073	0	0	0.130674	0	0	0	0	0	0	0	0	0	0	0
D010995	0	0	0	0	0	0	0	0	0	0	0	0	0	0	0	0	0	0.189517	0	0	0	0	0	0.230998	0.198107	0	0	0	0	0	0	0	0	0	0	0	0	0	0	0	0	0	0	0.134157	0	0	0	0	0
D009127	0	0	0	0	0	0	0	0	0	0	0	0	0	0	0	0	0	0	0	0	0	0	0	0	0	0	0	0	0	0	0	0	0.116212	0	0	0	0	0	0	0	0	0	0	0	0	0	0	0	0
D012878	0.371617	0	0	0	0.191807	0.236325	0	0.17567	0.498099	0.193006	0.14693	0.137596	0	0	0.152191	0	0	0	0.121857	0.160817	0	0.342505	0	0.250278	0.455099	0	0.180818	0	0.154619	0	0	0	0	0.112728	0.355917	0.241198	0.136929	0.348998	0	0	0.288419	0.148961	0	0.123964	0	0.139254	0	0.19824	0.178291
D007410	0	0	0	0	0	0	0	0	0	0	0	0	0	0	0	0	0	0	0	0	0	0	0	0.167272	0.209933	0	0	0	0	0	0	0	0	0	0	0	0.306981	0	0	0	0	0	0	0	0	0	0	0.133859	0
D008114	0	0	0	0	0	0	0	0	0	0	0	0	0	0	0	0	0	0	0	0	0	0	0	0.320356	0	0	0	0.101982	0	0	0	0	0	0	0	0	0	0.250962	0	0	0	0	0	0	0	0	0	0	0
D050723	0	0	0	0	0.133979	0.188228	0	0.116202	0	0.181388	0	0	0	0	0	0.115716	0	0.147408	0	0	0.100947	0	0	0.171972	0.286418	0	0.290298	0.130726	0	0	0	0	0	0	0.208434	0.401196	0	0.170335	0	0	0	0	0	0	0	0.137131	0	0.219368	0.330925
D006938	0	0	0	0	0	0.165322	0.130431	0.127562	0	0.118328	0	0	0	0	0.133448	0	0	0	0	0	0	0	0	0.276182	0.149756	0.188922	0.159082	0.105898	0	0	0	0.555191	0	0	0	0	0	0.226246	0	0.195952	0	0	0	0.455961	0	0	0	0.107156	0
D006953	0	0	0	0	0	0	0	0	0	0	0	0	0	0	0	0	0	0	0	0	0	0	0	0	0	0	0	0	0	0	0	0	0	0	0	0	0	0	0	0	0	0	0	0	0	0	0	0	0
D001927	0	0	0	0.350868	0.555718	0	0	0	0.166493	0.361388	0.139098	0	0	0.255972	0.31837	0	0	0.155189	0	0	0.186257	0.372454	0	0	0.219406	0	0.207776	0.128237	0	0	0	0	0	0.146686	0.350988	0.213452	0	0.168034	0	0	0	0	0	0	0	0	0	0	0.172117
D054091	0	0	0	0.341756	0	0	0	0	0	0	0	0	0	0	0.181215	0	0	0	0	0	0	0.365938	0	0	0	0	0	0	0	0	0	0	0	0	0.338236	0	0	0	0	0	0	0	0	0.11431	0	0	0	0	0
D001997	0	0	0	0	0	0	0	0	0	0	0	0	0	0	0	0	0	0.325523	0	0	0	0	0	0	0	0	0	0.188664	0	0	0	0	0	0	0	0	0	0	0	0	0.132806	0	0	0	0	0	0	0	0
D007021	0	0	0	0	0	0	0	0	0	0	0	0	0	0	0.132517	0	0	0	0	0	0	0.535635	0.104064	0	0	0.124842	0	0	0	0.368026	0	0	0	0	0.506735	0.103257	0	0	0	0	0.645327	0	0	0.168348	0.107123	0	0	0	0
D017240	0	0	0	0	0	0	0	0	0	0	0	0	0	0	0	0	0	0	0.126065	0	0	0	0	0	0	0	0	0	0	0	0	0	0	0	0	0.145378	0	0	0	0	0	0	0	0	0	0	0	0	0
D015783	0	0	0	0	0	0	0	0	0	0	0	0	0.239379	0	0.128204	0	0	0	0	0	0.278633	0.558316	0.159027	0	0	0	0	0	0	0	0	0	0	0.158267	0	0	0	0	0	0	0	0	0	0.158397	0	0	0	0	0
D001941	0	0	0	0	0	0.109521	0	0	0.157575	0	0	0	0	0	0	0	0	0	0	0	0	0	0	0.172495	0	0	0	0	0	0	0	0	0	0	0	0	0	0	0	0	0	0	0	0	0	0	0	0.119339	0
D007027	0	0	0	0	0.14718	0	0	0	0	0.208818	0	0	0	0	0.252687	0	0	0	0	0	0	0	0	0.277632	0.111326	0	0	0	0	0	0	0	0	0	0	0	0	0	0	0	0	0	0	0	0	0	0	0	0
D002546	0	0	0	0.336737	0.184669	0	0.102791	0	0	0.236009	0.125071	0	0	0	0.158852	0	0	0.351657	0	0	0	0	0	0	0.134664	0	0.177222	0.311702	0	0	0	0.144105	0	0.17895	0	0	0	0	0	0	0	0	0	0.140816	0	0	0	0	0
D016403	0	0	0	0	0	0.441621	0	0.460195	0	0.22732	0	0.331365	0	0	0	0	0	0.150679	0	0	0	0	0	0.299592	0.644838	0	0	0	0	0	0	0	0	0.102036	0.220196	0.243258	0.235488	0.642818	0	0	0	0	0	0	0	0	0	0.204989	0
D005832	0	0	0	0	0	0	0	0	0	0	0	0	0	0	0	0	0	0	0	0	0	0	0	0	0.126504	0	0	0	0	0	0	0	0	0	0	0	0	0	0	0	0	0	0	0	0	0	0	0	0
D006679	0	0	0	0.277589	0	0.217874	0	0.232083	0	0.158349	0	0	0	0	0.233513	0	0.185509	0	0.106715	0	0	0.133352	0	0.299158	0.503469	0	0.168652	0	0	0	0	0	0	0	0	0.135354	0	0	0	0	0	0	0	0	0	0	0	0.159203	0
D007634	0	0	0	0	0	0	0	0	0	0	0	0	0	0	0	0	0	0	0	0	0	0.524959	0	0	0	0	0	0	0	0	0	0	0	0.125574	0	0	0	0	0	0	0	0	0	0	0	0	0	0	0
D003456	0	0	0	0	0	0.213988	0	0.112574	0	0	0	0	0	0	0.175919	0	0	0	0	0	0	0.638589	0.131913	0.115397	0.176851	0.280923	0.126041	0	0.110044	0.495592	0	0	0.105032	0	0.531193	0.173233	0	0.252786	0	0	0.682048	0	0	0.189945	0	0	0	0.129812	0
D050197	0	0	0	0	0	0	0	0	0	0.109053	0	0	0	0	0.135849	0	0	0.120724	0	0	0	0	0	0.244428	0	0.272862	0.111092	0.112237	0	0	0	0.215259	0	0	0	0	0	0	0	0.296784	0	0	0	0.114814	0	0	0	0	0
D051437	0	0	0	0	0	0.116624	0	0	0	0	0	0	0	0	0	0	0	0	0	0	0	0	0	0.106133	0.184384	0	0	0	0	0	0	0	0	0	0	0	0	0.119775	0	0.805042	0	0	0	0	0	0	0	0.144075	0
D020158	0	0	0	0	0.503664	0	0	0	0	0.234764	0	0	0	0	0	0	0	0	0	0	0	0	0.152343	0	0	0	0	0	0	0	0	0	0	0	0	0	0	0	0	0	0	0	0	0	0	0	0	0	0
D011472	0	0	0	0	0	0	0	0	0	0	0	0	0	0	0	0	0	0	0	0	0	0	0	0	0	0	0	0	0	0	0	0	0	0	0	0	0	0	0	0	0	0	0	0	0	0	0	0	0
D009102	0	0	0	0	0	0	0	0.222569	0	0	0	0	0	0	0	0	0	0.401	0	0	0	0	0	0.15945	0.348659	0	0	0.307026	0	0	0	0.243519	0	0	0	0.126815	0	0	0	0.270214	0	0	0	0	0	0	0	0.117291	0
D007008	0	0	0	0	0	0	0	0	0	0	0	0	0	0	0	0	0	0	0	0	0	0	0.291878	0.139825	0.233258	0	0	0	0	0	0	0	0	0	0	0.326869	0	0	0	0	0	0	0	0	0	0	0	0.335758	0
D012164	0	0	0	0	0	0	0	0	0	0.53214	0.325685	0	0.198026	0	0	0	0	0	0	0	0	0.278208	0	0	0	0	0	0	0	0	0	0	0	0.83974	0	0	0	0	0	0	0	0	0	0	0	0.170747	0	0	0
D000140	0	0	0	0	0	0	0	0.127582	0	0.110894	0	0	0	0	0.134101	0	0	0.584557	0	0	0	0	0.260643	0.142308	0.217739	0	0.172738	0.592518	0	0	0	0	0	0	0	0.181186	0	0.174647	0	0	0	0	0	0	0	0	0	0	0
D001117	0	0	0	0	0	0	0	0	0	0	0	0	0	0	0	0	0	0	0	0	0	0	0	0	0	0	0	0	0	0	0	0	0	0	0	0	0	0	0	0	0	0	0	0	0	0	0	0	0
D012507	0	0	0	0	0	0.455443	0.137674	0	0	0.283486	0	0	0	0	0	0.131984	0	0.142714	0	0	0	0.16438	0	0.260897	0.473498	0	0	0.225393	0	0	0	0	0	0.140716	0.264658	0.295634	0	0	0	0	0	0	0	0.142698	0	0	0	0	0
D020256	0	0	0	0	0	0	0	0	0	0.549978	0.401863	0	0.220141	0	0	0	0	0	0	0	0	0	0	0	0	0	0	0	0	0	0	0	0	0.899181	0	0	0	0	0	0	0	0	0	0	0	0	0	0	0
D049913	0	0	0	0	0	0	0	0	0	0	0	0	0	0	0.116609	0	0	0	0	0	0	0	0	0	0	0	0	0	0	0	0	0	0	0	0	0.165051	0	0	0	0	0	0	0	0	0	0	0	0	0
D010282	0	0	0	0	0	0	0	0	0	0	0	0	0	0	0.108953	0	0	0	0	0	0	0	0	0.184129	0.205532	0	0	0	0	0	0	0	0	0	0	0.168254	0	0	0	0	0	0	0	0	0	0	0	0.832396	0
D006965	0	0	0	0	0	0	0	0	0	0	0	0	0	0	0	0	0	0	0	0	0	0	0	0.16431	0.139771	0.270092	0	0	0	0	0	0	0	0	0	0	0	0	0	0	0	0	0	0	0	0	0	0	0
D006258	0	0	0.118962	0	0	0.249172	0	0.121925	0	0	0	0.125838	0	0	0	0	0	0.17202	0	0.277657	0	0	0	0.400031	0.343072	0	0.356438	0.18437	0.164406	0	0	0	0	0	0	0.187063	0	0.163038	0	0	0	0.169469	0.140691	0.105411	0	0	0	0.110508	0
D020386	0	0	0	0	0	0	0	0	0	0	0	0	0	0	0	0	0	0	0	0	0	0	0	0	0	0	0	0	0	0	0	0	0	0	0	0	0	0	0	0	0	0	0	0	0	0	0	0	0
D007020	0	0	0	0	0	0	0	0	0	0	0	0	0	0	0	0	0	0	0	0	0	0	0	0	0.256282	0	0	0	0	0	0	0	0	0	0.107913	0	0	0	0	0	0	0	0	0	0	0	0	0	0
D006618	0	0	0	0	0	0	0	0	0	0	0	0	0	0	0	0	0	0	0	0	0	0.165176	0	0	0	0	0	0	0	0	0	0	0	0	0	0	0	0	0	0	0	0	0	0	0	0	0	0	0
D013375	0	0	0	0.236897	0.629604	0	0	0	0.185479	0	0	0	0	0	0.506941	0	0	0	0.119903	0	0	0	0	0.1409	0.183045	0	0	0	0	0	0	0	0.391138	0	0	0.117805	0	0	0	0	0	0	0.128104	0	0	0	0	0.17787	0
D019052	0	0	0	0	0	0	0	0	0	0	0	0	0	0	0.559466	0	0	0	0	0	0	0	0	0.11676	0.105404	0	0	0	0	0	0	0	0	0	0	0	0	0	0	0	0	0	0	0	0	0	0	0	0
D012626	0	0	0	0	0	0	0	0	0	0	0	0	0	0	0.178708	0	0	0	0	0	0	0.708348	0	0	0	0	0	0	0	0.113615	0	0	0	0	0.598703	0.109483	0	0.15501	0	0	0	0	0	0.224769	0	0	0	0	0
D034141	0	0	0	0	0	0	0	0	0	0	0	0	0	0	0	0	0	0	0	0	0	0	0	0	0	0	0	0	0	0	0	0	0	0	0	0	0	0	0	0	0	0	0	0	0	0	0	0	0
D013734	0	0	0	0	0	0	0	0	0	0	0	0	0	0	0.114863	0	0	0	0	0	0	0.158619	0	0	0	0.692565	0	0	0	0.803916	0	0	0	0	0.160487	0	0	0	0	0	0	0	0	0	0	0	0	0	0
D013736	0	0	0	0	0	0.197741	0	0.173074	0	0	0	0	0	0	0	0	0.185384	0	0	0	0	0	0	0.373991	0.388793	0.197	0	0	0	0.472462	0	0	0	0	0	0.159371	0	0	0	0	0	0	0	0	0	0	0	0	0
D000744	0	0	0	0	0	0	0	0	0	0	0	0	0	0	0	0	0	0	0	0	0	0	0	0	0.105104	0	0	0	0	0	0	0	0	0	0	0	0	0	0	0	0	0	0	0	0	0	0	0	0
D017511	0	0	0	0	0	0.225061	0	0.209737	0	0	0	0	0	0	0	0	0	0	0	0	0	0	0	0.193396	0.417585	0	0	0	0	0	0	0	0	0	0	0.171851	0	0	0	0	0	0	0	0	0	0	0	0	0
D012127	0	0	0	0	0	0	0	0	0	0	0	0	0	0	0	0	0	0.231118	0	0	0	0	0	0	0.114395	0	0	0.230413	0	0	0	0	0	0	0	0	0	0	0	0	0	0	0	0	0	0	0	0	0
D011666	0	0	0	0	0	0	0.748226	0	0	0	0	0	0	0	0	0	0	0	0	0	0	0	0	0	0	0	0	0	0	0	0	0	0	0	0.394216	0	0	0	0	0	0	0	0	0.585611	0	0	0	0	0
D016864	0	0	0	0	0	0	0	0	0	0.152	0	0	0	0	0	0	0	0	0	0	0	0	0	0.141592	0.218609	0	0	0	0	0.227557	0	0	0	0	0	0	0	0.104928	0	0	0	0	0	0	0	0	0	0	0
D010505	0	0	0	0	0	0	0	0	0	0	0	0	0	0	0	0	0	0	0	0	0	0	0	0	0.429429	0	0	0	0	0	0	0	0	0	0	0	0	0	0	0	0	0	0	0	0	0	0	0	0
D014693	0	0	0	0	0	0.142419	0.246477	0	0	0	0	0	0	0	0	0	0	0.137405	0	0	0	0	0	0	0	0	0.106526	0.139377	0	0	0	0.253192	0	0	0	0	0	0	0	0	0	0	0	0.520554	0	0	0	0	0
D000752	0	0	0	0.113874	0	0	0	0	0	0	0	0	0	0	0	0	0	0	0	0	0	0	0	0.168369	0	0	0	0	0	0	0	0	0	0	0	0	0	0	0	0	0	0	0	0	0	0	0	0	0
D012640	0	0	0	0	0.924068	0	0	0	0.262352	0	0	0	0	0	0	0	0	0	0	0	0	0	0	0	0	0	0	0	0	0	0	0	0	0	0	0	0	0	0	0	0	0	0	0	0	0	0	0	0
D012859	0	0	0	0	0	0	0	0	0	0	0	0	0	0	0	0	0	0	0	0	0	0	0	0.100176	0.255762	0	0	0	0	0	0	0	0	0	0	0.14478	0	0	0	0	0	0	0	0	0	0	0	0	0
D003092	0	0	0	0	0	0	0	0	0	0	0	0	0	0	0	0	0.229251	0	0	0	0	0	0	0.159334	0.218867	0	0	0	0	0	0	0	0	0	0	0	0	0	0	0	0	0	0	0	0	0	0	0	0
D012004	0	0	0	0	0	0.145614	0	0.244163	0	0	0	0.284778	0	0	0	0	0.205845	0	0	0	0	0	0	0.355667	0.426897	0	0	0	0.224828	0	0	0	0	0	0	0.127691	0.3548	0.175386	0	0	0	0	0	0	0	0	0	0.144007	0
D013595	0	0	0	0	0	0	0	0	0	0	0	0	0	0	0	0	0	0	0	0	0	0	0	0	0.218814	0	0	0	0	0	0	0	0	0	0	0	0	0	0	0	0	0	0	0	0	0	0	0	0
D016773	0	0	0	0.108539	0	0	0	0	0	0	0	0	0	0	0	0	0	0	0	0	0	0	0	0.126953	0.140758	0	0	0	0	0	0	0	0	0	0	0.125909	0	0	0	0	0	0	0	0	0	0	0	0	0
D011658	0	0	0	0	0	0.370737	0	0	0	0	0	0	0	0	0	0	0	0.4377	0	0	0	0	0	0.202264	0.186907	0	0.133804	0.679082	0	0	0	0.137029	0	0	0	0	0.109326	0.222565	0	0	0	0	0.200358	0.145442	0.205371	0	0	0	0
D008180	0	0	0	0	0.155644	0.22678	0	0	0	0.13509	0	0.119524	0	0	0.127375	0	0	0	0	0	0	0	0	0.12068	0.337406	0	0.124721	0	0	0	0	0	0.108068	0	0.154761	0.130465	0.232706	0.217117	0	0.296889	0	0	0.111022	0	0	0.138177	0	0.180133	0
D005141	0	0	0	0	0	0	0	0	0	0	0	0	0	0	0	0	0	0	0	0	0	0	0	0	0	0	0	0	0	0	0	0	0	0	0	0	0	0	0	0	0	0	0	0	0	0	0	0	0
D007690	0	0	0	0	0.20326	0	0	0	0	0	0	0	0	0	0.142468	0	0	0	0	0	0	0.335821	0.303168	0.167767	0.190315	0	0	0	0	0	0	0	0	0	0.410897	0.179117	0	0	0	0.414454	0	0	0	0	0	0	0	0.202787	0
D011041	0	0	0	0	0.192365	0	0	0	0	0	0	0	0	0	0.151391	0	0	0.151312	0	0	0	0	0	0.11777	0.26467	0	0	0.102416	0	0	0	0	0.107746	0	0	0	0	0	0	0	0	0	0	0	0	0	0	0	0
D009886	0	0	0	0	0	0	0	0	0	0.250016	0	0	0	0	0	0	0	0	0.23854	0	0	0	0	0	0	0	0	0	0	0	0	0	0	0	0	0.232126	0	0	0	0	0	0	0	0	0	0	0	0	0
D009101	0	0	0.109212	0	0	0.13793	0	0.113167	0	0	0	0	0	0	0	0	0	0	0	0	0	0	0	0	0.300406	0	0	0	0	0	0	0	0	0	0.122141	0.118499	0.209155	0.250078	0	0.29407	0	0.10395	0	0	0	0	0	0.194666	0
D006105	0	0	0	0	0.153758	0	0	0.234855	0	0	0	0.225724	0	0	0	0	0	0.162225	0	0	0	0	0	0.247357	0.49604	0	0	0.170037	0	0	0	0	0	0	0.167904	0.150187	0	0.462546	0	0	0	0	0	0	0	0	0	0.155209	0
D001165	0	0	0	0	0	0.169225	0.367739	0	0	0.150871	0	0	0	0	0	0	0	0.181094	0	0	0	0	0	0.179085	0.27751	0	0	0.211006	0.104376	0	0	0.115564	0	0	0	0	0	0	0	0	0	0	0	0.286009	0	0.102987	0	0	0.469604
D008064	0	0	0	0	0	0	0	0	0	0	0	0	0	0.469378	0.19902	0.104048	0	0	0	0	0.209945	0.509748	0	0	0.124261	0	0	0	0	0	0	0	0.16652	0.126047	0	0.210311	0	0	0	0	0	0	0	0.145866	0	0	0	0	0
D005921	0	0	0	0	0	0	0	0	0	0	0	0	0	0	0	0	0	0	0	0	0	0	0	0	0.137693	0	0	0	0	0	0	0	0	0	0	0	0	0	0	0.401578	0	0	0	0	0	0	0	0	0
D009456	0	0	0	0	0.107109	0	0	0	0.697192	0	0	0	0	0	0	0	0	0	0	0	0	0.220587	0	0	0	0	0	0	0	0	0	0	0	0	0.237795	0	0	0	0	0	0.169406	0	0	0	0	0	0	0	0
D011686	0	0	0	0	0	0	0	0	0	0	0	0	0	0	0.110985	0	0	0	0	0	0	0.389237	0	0	0	0	0	0	0	0	0	0	0	0	0	0	0	0	0	0	0	0	0	0.120879	0	0	0	0	0
D016518	0	0	0	0	0	0	0	0	0.175611	0.166644	0.200856	0	0	0	0	0.102437	0	0	0	0	0	0	0	0	0.111661	0	0	0	0	0	0	0	0	0.107808	0	0.130928	0	0	0	0	0	0	0	0	0	0	0	0	0
D040181	0	0.123364	0	0	0	0	0	0	0	0	0.196728	0	0	0	0.191952	0.182343	0	0	0.113229	0	0.110621	0.509544	0.13516	0	0.126074	0	0	0	0	0	0	0	0.278507	0.211626	0.339814	0.203031	0.10091	0.216721	0	0	0.375772	0	0	0.114076	0	0	0	0.127522	0
D006548	0	0	0	0	0	0.332964	0.112431	0.173415	0	0	0	0.440072	0	0	0	0	0.305285	0.244418	0	0	0	0	0	0.614463	0.257703	0	0.192301	0.349726	0.265881	0	0	0.239381	0	0	0.168708	0	0	0.192967	0	0	0.145939	0	0.170253	0.262142	0.188774	0	0	0.141209	0
D006947	0	0	0	0	0	0	0	0	0	0	0	0	0	0	0	0	0	0	0	0	0	0	0	0.104071	0.223317	0	0	0	0	0	0	0	0	0	0	0	0	0	0	0	0	0	0.314443	0	0	0	0	0	0
D005124	0	0	0	0	0	0	0	0	0	0.335041	0.35046	0	0.500408	0	0.125117	0	0	0	0	0	0	0.723127	0.216536	0	0	0	0	0	0	0	0	0	0	0.407822	0.507363	0.132091	0	0	0	0	0.578395	0	0	0.165537	0	0	0	0	0
D011537	0	0	0	0	0	0	0	0	0	0	0	0	0	0	0	0	0	0	0	0	0	0	0	0	0	0	0	0	0	0	0	0	0	0	0	0	0	0	0	0	0	0	0	0	0	0	0	0.127399	0
D008881	0	0	0	0	0	0	0	0	0	0.487051	0	0	0	0	0.156915	0	0	0	0	0	0	0	0	0.13671	0.233004	0	0	0	0	0	0	0	0	0.141259	0.212745	0.164306	0	0	0	0	0	0.296962	0	0	0	0	0	0	0
D006391	0	0	0	0	0	0	0	0.11188	0.214312	0.122331	0	0.122935	0.428605	0	0	0	0	0	0	0	0	0	0	0.120019	0.307386	0	0	0.113533	0	0	0	0	0	0	0	0.150641	0	0	0	0	0.152038	0	0	0.122014	0	0	0	0	0.266182
D001072	0	0	0	0.12063	0	0	0	0	0	0	0	0	0	0	0	0	0	0	0	0	0	0	0	0	0	0	0	0	0	0	0	0	0	0	0	0	0	0	0	0	0	0	0	0	0	0	0	0	0
D001254	0	0	0	0.23468	0.420965	0.115058	0	0	0.140897	0.397589	0	0	0.115115	0	0.198971	0	0	0	0	0	0	0	0	0.180297	0.267683	0	0.264893	0	0	0	0	0	0.130963	0.218355	0.244459	0.215932	0	0	0	0	0	0.201628	0	0	0	0	0	0.140288	0
D015518	0	0	0	0	0.46413	0	0	0	0	0	0	0	0	0	0.195273	0	0	0	0	0	0	0.445715	0.140187	0	0	0	0	0	0	0	0	0	0	0	0	0.112855	0	0	0	0	0	0	0	0.138171	0	0	0	0	0
D016553	0	0	0	0	0	0	0	0	0	0	0	0	0	0	0	0	0	0	0	0	0	0	0	0	0	0	0	0	0	0	0	0	0	0	0	0	0	0	0	0	0	0	0	0	0	0	0	0	0
D004406	0	0	0	0	0	0	0	0	0	0	0	0	0	0	0	0	0	0	0	0	0	0	0	0	0.175054	0	0	0	0	0	0	0	0	0	0	0	0	0	0	0	0	0	0	0	0	0	0	0	0
D014549	0	0	0	0	0	0	0	0	0	0	0	0	0	0	0	0	0	0	0	0	0	0	0	0	0	0	0	0	0	0	0	0	0	0	0.123333	0	0	0	0	0	0	0	0	0	0	0	0	0	0
D002180	0	0	0	0	0	0	0	0	0	0	0	0	0	0	0	0	0	0	0	0	0	0	0	0.14225	0.238798	0	0	0	0	0	0	0	0	0	0	0	0	0	0	0	0	0	0	0	0	0	0	0	0
D015212	0	0	0	0	0	0.183069	0	0.261787	0	0	0	0	0	0	0	0	0.249218	0	0	0	0	0	0	0.272411	0.30306	0	0	0	0	0	0	0	0	0	0	0	0.400205	0	0	0	0	0	0	0	0	0	0	0.134104	0
D018979	0	0	0	0	0	0	0	0	0	0	0	0	0	0	0	0.389318	0	0	0	0	0.100833	0	0	0	0	0	0	0	0	0	0	0	0	0	0	0.473209	0	0	0	0	0	0.333864	0	0	0	0	0	0	0
D010302	0	0	0	0.175907	0	0	0	0	0	0	0	0	0	0	0.273161	0	0	0	0	0	0	0	0	0	0	0	0	0	0	0	0	0	0.715028	0	0	0	0	0	0	0	0	0	0	0	0	0	0	0	0
D000168	0	0	0	0	0	0	0	0	0	0	0	0	0	0	0.149926	0	0	0	0	0	0	0	0	0	0	0	0	0	0	0	0	0	0	0	0.57333	0.147454	0	0	0	0	0	0	0	0.195556	0	0	0	0	0
D021441	0	0	0	0	0	0.18579	0	0.602445	0	0	0	0	0	0	0	0	0.110687	0.146529	0	0	0	0	0	0.206981	0.187494	0	0.185415	0.151926	0	0	0	0	0	0	0	0	0	0	0	0	0	0	0.103338	0	0	0	0	0	0
D001342	0	0	0	0	0	0	0.136899	0	0	0	0	0	0	0	0.165818	0	0	0	0	0	0	0	0	0.168917	0.153939	0	0	0.105689	0	0	0	0	0	0	0.109369	0	0	0	0	0	0	0	0	0	0	0	0	0	0
D014570	0	0	0	0	0	0	0	0	0	0	0	0	0	0	0	0	0	0	0	0	0	0	0	0	0.100382	0	0	0	0	0	0	0	0	0	0	0	0	0	0	0	0	0	0	0	0	0	0	0	0
D006345	0	0	0	0	0	0	0	0	0	0	0	0	0	0	0	0	0	0	0	0	0	0	0	0	0	0	0	0	0	0	0	0	0	0	0	0	0	0	0	0	0	0	0	0	0	0	0	0	0
D013953	0	0	0	0	0	0	0	0	0	0	0	0	0	0	0	0	0	0	0	0	0	0	0	0.279419	0	0	0	0	0	0	0	0	0	0	0	0	0	0	0	0	0	0	0	0	0	0	0	0	0
D014811	0	0	0	0	0	0	0	0	0	0	0	0	0	0	0.137418	0	0	0	0	0	0	0	0	0.119303	0.104507	0	0	0	0	0	0	0	0	0	0	0	0	0	0	0	0	0	0	0	0	0	0	0	0
D001167	0	0	0	0	0	0	0	0	0	0	0.108192	0	0	0	0	0	0	0	0	0	0	0	0	0	0	0	0	0	0	0	0	0	0	0	0	0	0	0	0	0	0	0	0	0	0	0	0	0	0
D001019	0	0	0	0	0	0	0	0	0	0	0	0	0	0	0	0	0	0	0	0	0	0	0	0	0	0	0	0	0	0	0	0	0	0	0	0	0	0	0	0	0	0	0	0	0	0	0	0	0
D006111	0	0	0	0	0	0.180032	0	0.100986	0	0	0	0	0	0	0	0	0	0	0	0	0	0	0	0	0.224054	0	0	0	0	0	0	0	0	0.142114	0	0.207193	0.211053	0	0	0	0	0	0	0	0	0	0	0.161139	0
D054537	0	0	0	0	0	0	0	0	0	0	0	0	0	0	0	0	0	0	0	0	0	0	0	0	0	0	0	0	0	0	0	0	0	0	0	0	0	0	0	0	0	0	0	0	0	0	0	0	0
D002806	0	0	0	0	0	0	0	0	0	0	0	0	0	0	0	0	0	0	0	0	0	0	0	0	0	0	0	0	0	0	0	0	0	0	0	0	0	0	0	0	0.509715	0	0	0	0	0	0	0	0
D009668	0	0	0	0	0	0	0	0	0	0.264429	0	0	0	0	0	0	0	0	0	0	0	0	0	0	0	0	0	0	0	0	0	0	0	0	0	0	0	0	0	0	0	0	0	0	0	0	0	0	0
D053840	0	0	0	0	0	0	0.206052	0	0	0	0	0	0	0	0	0	0	0	0	0	0	0	0	0	0.215073	0	0	0	0	0	0	0	0	0	0	0	0	0	0	0	0	0	0	0.371746	0	0	0	0	0
D010855	0	0	0	0	0	0	0	0	0	0	0	0	0	0	0.127936	0	0	0	0	0	0	0	0.13194	0	0	0	0	0	0	0	0	0	0	0	0.591329	0.117089	0	0	0	0	0	0	0	0.228027	0	0	0	0	0
D001989	0	0	0	0	0	0	0	0	0	0	0	0	0	0	0	0	0	0	0	0	0	0	0	0	0.13645	0	0	0	0	0	0	0	0	0	0	0	0	0	0	0	0	0	0	0	0	0	0	0	0
D013122	0	0	0	0	0	0	0	0	0	0	0	0	0	0	0	0	0	0	0	0	0	0	0	0	0	0	0	0	0	0	0	0	0	0	0.302204	0.273376	0	0	0	0	0	0	0	0	0	0	0	0	0
D014596	0	0	0	0	0	0	0	0	0	0	0	0	0	0	0	0	0	0	0	0	0	0	0	0	0	0	0	0	0	0	0	0	0	0	0	0	0	0	0	0	0	0	0	0	0	0	0	0	0
D038261	0	0	0	0	0.384783	0	0	0	0	0	0	0	0	0.18409	0.102562	0.180065	0	0	0.277039	0	0	0	0.159068	0	0	0	0	0	0	0	0	0	0	0	0	0.158158	0	0	0	0	0	0	0	0	0	0	0	0	0
D012552	0	0	0	0	0.104158	0.261048	0	0.286757	0	0	0	0	0	0	0	0	0.399531	0	0	0	0	0	0	0.409274	0.536571	0	0.176615	0	0	0	0	0	0	0	0	0.101456	0	0	0	0.301112	0	0	0	0	0	0	0	0	0
D017246	0	0	0	0	0	0	0	0	0	0	0	0	0	0	0	0	0	0	0	0	0	0	0	0	0	0	0	0	0	0	0	0	0	0	0	0	0	0	0	0	0	0	0	0	0	0	0	0	0
D007333	0	0	0	0	0	0	0	0.109771	0	0.137971	0	0	0	0	0.159705	0	0	0	0	0	0	0	0	0.282761	0	0.415822	0	0	0	0	0	0	0	0	0	0	0	0	0	0	0	0	0	0	0	0	0	0.102761	0
D012555	0	0	0	0	0	0	0	0.199973	0	0	0	0	0	0	0	0	0	0	0	0	0	0	0	0.398056	0.365638	0	0	0	0.170169	0	0	0	0	0	0	0	0	0	0	0	0	0	0	0	0	0	0	0.169822	0
D004427	0	0	0	0	0	0	0	0	0	0	0	0	0	0	0	0	0	0	0	0	0	0.323101	0	0	0	0	0	0	0	0	0	0	0	0	0	0	0	0	0	0	0	0.172886	0	0	0	0	0	0	0.142204
D010673	0	0	0	0	0	0.313375	0.182464	0.219396	0	0.344194	0	0.330483	0	0	0	0	0.1877	0.11474	0	0	0	0	0	0.24112	0.398463	0	0.383072	0.126027	0.155176	0	0	0.255181	0	0	0.34189	0.140662	0.12075	0.24482	0	0	0	0.2189	0	0.307598	0	0	0	0.183193	0
D016738	0	0	0	0	0	0	0	0	0	0	0	0	0	0	0	0	0	0	0	0	0	0	0	0.115351	0	0	0	0	0	0	0	0	0	0	0	0	0	0	0	0	0	0	0	0	0	0	0	0	0
D044483	0	0	0	0	0	0	0	0.136079	0.357383	0	0	0	0	0	0	0	0	0	0	0	0	0	0	0	0.133332	0	0	0	0	0	0	0	0	0	0	0	0.265084	0	0	0	0	0	0	0	0	0	0	0	0
D020788	0	0	0	0	0	0	0	0	0	0	0	0	0	0	0.16843	0	0	0	0	0	0	0.241017	0	0.247769	0	0	0	0	0	0	0	0	0	0	0	0	0	0	0	0	0.222853	0	0	0	0	0	0	0	0
D000380	0	0	0	0	0	0	0	0	0	0	0	0	0	0	0	0	0	0	0	0	0	0	0	0.105174	0.70958	0	0	0	0	0	0	0	0	0	0	0	0	0	0	0	0	0	0	0	0	0	0	0	0
D013789	0	0	0	0	0.214766	0	0	0.291992	0	0.116855	0	0	0	0	0.103337	0	0	0.129944	0	0	0	0	0	0	0.242244	0	0	0	0	0	0	0	0	0	0	0.156434	0	0	0	0	0	0	0	0	0	0	0	0	0
D051556	0	0	0	0	0	0	0	0	0	0	0	0	0	0	0	0	0	0	0	0	0	0	0	0	0.112419	0	0	0	0	0	0	0	0	0	0	0	0	0	0	0	0	0	0	0	0	0	0	0	0
D000686	0	0	0	0	0	0.252603	0	0.134135	0	0	0	0	0	0	0	0	0.117728	0	0	0	0	0	0	0.137236	0.3091	0	0.115036	0	0	0	0	0.105355	0	0	0.126733	0.142671	0.202617	0	0	0.293926	0	0	0	0.139364	0	0	0	0.194078	0
D000037	0	0	0	0	0	0	0	0	0	0	0	0	0	0	0	0	0	0	0	0	0	0	0	0	0	0	0	0	0	0	0	0	0	0	0	0	0	0	0	0	0	0	0	0	0	0	0	0	0
D013923	0	0	0	0	0	0.252876	0.149175	0.114859	0	0.164713	0	0	0	0	0.113654	0	0	0.164518	0	0	0	0	0	0.229271	0.252037	0.168448	0.227054	0.196602	0	0	0	0.562224	0	0.101283	0.114789	0.144155	0	0	0	0.107994	0	0	0	0.362853	0.156689	0	0	0.132461	0
D012131	0	0	0	0	0	0	0	0	0	0	0	0	0	0	0	0	0	0.90147	0	0	0	0	0	0	0.107236	0	0	0.888211	0.200812	0	0	0.174247	0	0	0	0.10007	0	0	0	0	0	0	0	0	0	0	0	0	0
D009377	0	0	0	0	0	0	0	0.150156	0	0	0	0	0	0	0	0	0	0	0	0	0	0	0	0.153102	0.148344	0.331336	0	0	0.115767	0.179481	0	0	0	0	0.122075	0	0	0	0	0	0	0	0	0	0	0	0	0.179973	0
D015228	0	0	0	0	0	0.107947	0	0.155113	0	0.144696	0	0	0	0	0.181526	0	0	0	0	0	0	0	0	0.338092	0.118695	0.358756	0	0	0	0	0	0	0	0	0	0	0	0.307479	0	0.148456	0	0	0	0	0	0	0	0.121166	0
D006556	0	0	0	0.174476	0	0	0	0	0	0.154761	0	0	0	0	0.251832	0	0	0.108578	0	0	0	0	0	0.144124	0.391119	0	0.178748	0	0	0	0	0	0.131709	0.102644	0	0.203307	0	0	0	0	0	0	0	0	0	0	0	0	0
D018324	0	0	0	0	0	0	0	0	0	0.113255	0	0	0	0	0	0	0	0	0	0	0	0	0	0	0	0	0	0	0	0	0	0	0	0.126963	0	0	0	0	0	0	0	0	0	0	0	0	0	0	0
D007340	0	0	0	0.136079	0.537749	0.116825	0	0	0	0	0	0	0	0	0.170415	0	0	0	0	0	0	0	0	0.118108	0	0	0	0	0	0	0	0	0	0	0	0	0	0	0	0	0	0	0	0.126972	0	0	0	0.160126	0
D057174	0	0	0	0.517542	0	0	0	0	0	0	0	0	0	0	0	0	0	0	0	0	0.152851	0	0	0	0	0	0	0	0	0	0	0	0	0	0	0	0	0	0	0	0	0	0	0	0	0	0	0	0
D000690	0	0.280801	0	0.134791	0	0	0	0	0	0	0	0	0	0	0	0.673519	0	0.120278	0.182332	0	0.348874	0	0	0	0.108485	0	0	0.150024	0	0	0	0	0	0	0.122822	0.6217	0	0.121012	0	0	0	0.33504	0	0	0	0	0	0	0
D005317	0	0	0	0	0	0	0	0	0	0	0	0	0	0	0	0	0	0	0	0	0	0	0	0	0	0	0	0	0	0	0	0	0	0	0	0	0	0	0	0	0.177315	0	0	0	0	0	0	0	0
D006008	0	0	0	0	0	0	0	0	0	0.10981	0	0	0	0	0.117095	0.396646	0	0	0.126484	0	0.11557	0.212338	0.61867	0.105739	0.148707	0.142775	0	0	0	0	0	0	0	0	0	0.616668	0	0.272795	0	0	0.431551	0	0	0	0	0	0	0	0
D008585	0	0	0	0	0	0	0	0	0	0	0	0	0	0	0	0	0	0	0	0	0	0	0	0	0.222362	0	0	0	0	0	0	0	0	0	0	0	0	0	0	0	0	0	0	0	0	0	0	0	0
D044342	0	0	0	0	0	0.1238	0	0	0	0	0	0	0	0	0.215735	0.105228	0	0	0	0	0	0	0	0.441667	0.151662	0.121485	0	0	0	0	0	0	0	0	0	0	0	0	0	0	0	0	0	0	0	0	0	0	0
D014846	0	0	0	0	0	0	0	0	0	0	0	0	0	0	0	0	0	0	0	0	0	0	0	0.129002	0	0	0	0	0	0	0	0	0	0	0.103146	0	0	0	0	0	0	0	0	0	0	0	0	0	0
D001168	0	0	0	0	0	0.174193	0	0.166675	0.172231	0	0	0.130688	0	0	0	0	0	0	0	0	0	0	0	0.219992	0.249669	0.105371	0	0	0	0	0	0	0	0	0.191971	0.365922	0	0	0	0	0	0	0	0	0	0	0	0.172226	0
D008589	0	0	0	0	0	0	0	0	0	0	0	0	0	0	0	0	0	0	0	0	0	0	0	0	0.127237	0	0	0	0	0	0	0	0	0	0	0	0	0	0	0	0	0	0	0	0	0	0	0	0
D054990	0	0	0	0	0	0.37128	0	0	0	0	0	0	0	0	0	0	0	0	0	0	0	0	0	0.198685	0.183989	0	0	0	0	0	0	0	0	0	0	0	0	0.216261	0	0	0	0	0	0.14578	0	0	0	0	0
D008060	0	0.100299	0	0	0	0	0	0.108113	0	0.131742	0	0	0	0	0.20116	0.193704	0	0	0	0	0	0.317386	0	0.222835	0.123562	0.610475	0	0	0	0.155486	0	0	0	0	0.295229	0.215846	0	0.272356	0	0.112079	0.295453	0	0	0.102381	0	0	0	0.141375	0
D006457	0	0	0	0	0	0	0	0	0	0	0	0	0	0	0	0	0	0	0	0	0	0	0	0	0.162992	0	0	0	0	0	0	0	0	0	0	0	0	0	0	0	0	0	0	0	0	0	0	0	0
D014376	0	0	0	0	0	0	0	0.336899	0	0.130105	0	0	0	0	0.122203	0	0.217791	0.126845	0	0	0	0.141952	0	0.37856	0.574514	0	0	0.161202	0	0	0	0	0	0	0.109161	0.116828	0.224152	0	0	0	0	0	0	0	0	0	0	0	0
D016108	0	0	0	0	0	0	0	0	0	0	0	0	0	0	0	0	0	0	0	0	0	0.129588	0	0	0	0	0	0	0	0	0	0	0	0	0.106311	0	0	0	0	0	0	0	0	0	0	0	0	0	0
D019066	0	0	0.198226	0	0	0.237918	0	0	0	0	0	0	0	0	0	0	0	0	0.11176	0	0	0.158573	0	0.17559	0.194529	0	0	0	0	0	0	0	0	0	0.164121	0.151525	0	0.111233	0	0	0.102487	0.109676	0.148234	0.101196	0	0	0	0	0.271509
D013285	0	0	0	0	0	0	0	0	0	0	0	0	0	0	0	0	0	0	0	0	0	0	0	0	0	0	0	0	0	0	0	0	0	0	0	0	0	0	0	0	0	0	0	0	0	0	0	0	0
D003294	0	0	0	0	0.890083	0	0	0	0	0	0	0	0	0	0	0	0	0	0	0	0	0	0	0	0.268083	0	0	0	0	0	0	0	0	0	0	0	0	0	0	0	0	0	0	0	0	0	0	0	0
D012614	0	0	0	0	0	0	0	0	0	0	0	0	0	0	0	0	0	0	0	0	0	0	0	0	0	0	0	0	0	0	0	0	0	0	0	0	0	0	0	0	0	0	0	0	0	0	0	0	0
D003424	0	0	0.197484	0	0	0.250742	0	0.319477	0	0	0	0.436875	0	0	0.12803	0	0	0	0	0	0	0	0	0.281942	0.386615	0	0.133834	0	0.266782	0	0	0	0	0	0.105205	0.138573	0.421909	0.297093	0	0	0	0.107248	0	0	0	0	0	0.198876	0
D013967	0	0	0	0.195076	0	0	0	0.108145	0.127156	0	0	0	0	0.230106	0.303604	0	0	0	0	0	0	0	0	0.262732	0.271901	0	0	0	0	0	0	0	0.129242	0	0	0	0.249179	0	0	0	0	0	0	0	0	0	0	0	0
D017204	0	0	0	0	0.603375	0	0	0	0	0	0	0	0	0.13727	0.269868	0	0	0	0.137115	0	0	0.582792	0.166837	0	0	0	0	0	0	0	0	0	0	0	0	0.118495	0	0.16293	0	0	0.660142	0	0	0.181171	0	0	0	0	0
D053578	0	0	0	0	0	0	0	0	0	0	0	0	0	0	0.186373	0	0	0	0	0	0	0	0	0	0	0	0	0	0	0	0	0	0	0	0	0	0	0	0	0	0	0	0	0	0	0	0	0	0
D006554	0	0	0	0	0	0.198198	0	0.100399	0	0	0	0	0	0	0	0	0	0	0	0	0	0.204389	0	0	0.13953	0	0	0	0	0	0	0	0	0	0.147462	0	0	0.122908	0	0	0	0	0	0	0.147529	0	0	0	0
D018202	0	0	0	0	0	0	0	0	0	0	0	0	0	0	0	0	0	0.119976	0	0	0	0	0	0.196558	0.191366	0	0	0	0	0	0	0	0	0	0	0	0	0	0	0	0	0	0	0	0	0	0	0	0
D006061	0	0	0	0	0	0	0	0	0	0	0	0	0	0	0	0	0	0	0	0	0	0.464327	0	0	0	0.260985	0	0	0	0.733123	0	0	0	0	0.450709	0	0	0.103545	0	0	0	0	0	0.158082	0	0	0	0	0
D000844	0	0	0	0	0	0	0	0	0	0	0	0	0	0	0	0	0	0	0	0	0	0	0	0	0	0	0	0	0	0	0	0	0	0	0	0	0	0	0	0	0	0	0	0	0	0	0	0	0
D017237	0	0	0	0	0	0	0	0	0	0	0	0	0	0	0	0	0	0	0	0	0	0	0.131024	0	0	0	0	0	0	0	0	0	0	0	0	0.104733	0	0	0	0	0	0	0	0	0	0	0	0	0
D014511	0	0	0	0	0	0	0	0	0	0	0	0	0	0	0.125296	0.114138	0	0	0	0	0	0	0	0	0.205202	0	0	0	0	0	0	0	0	0	0	0.146319	0	0	0	0	0	0	0	0	0	0	0	0.221976	0
D002294	0	0.158058	0.306303	0	0	0.406905	0.104007	0.178872	0	0.151008	0	0.273108	0	0	0	0	0.212408	0.272584	0	0	0	0	0	0.594756	0.569486	0	0.378824	0.300365	0.254257	0	0	0.110251	0	0	0.140666	0.198906	0.145426	0.280127	0	0	0	0.153149	0.248936	0.115632	0	0	0	0.152548	0
D003317	0	0.133123	0	0	0	0	0	0	0.230761	0.337032	0.29208	0	0.266329	0	0	0	0	0	0	0	0	0.454097	0	0	0.128235	0	0.138576	0	0	0	0	0	0	0.351473	0.27273	0.125276	0	0	0	0	0	0	0	0	0	0	0	0.100466	0
D019465	0	0	0	0	0	0	0	0	0.119799	0	0	0	0	0	0.185349	0	0	0	0	0	0	0.794342	0.258345	0	0	0	0	0	0	0.124049	0	0	0.138765	0	0.685469	0.153758	0	0.173608	0	0	0.85866	0	0	0.238729	0.122113	0	0	0	0
D010267	0	0	0	0	0	0	0	0	0	0	0	0	0	0	0	0	0	0	0	0	0	0	0	0	0.265602	0	0	0	0	0	0	0	0	0	0.145812	0.115853	0	0	0	0	0	0	0	0	0	0	0	0	0
D007835	0	0	0	0	0	0	0	0	0	0	0	0	0	0	0	0	0	0	0	0	0	0.233126	0	0	0.141351	0	0	0	0	0	0	0	0	0	0	0	0	0	0	0	0	0	0	0	0	0	0	0	0
D008305	0	0	0	0	0	0	0	0	0	0	0	0	0	0	0	0	0	0	0	0	0	0	0	0	0.113492	0	0	0	0	0	0	0	0	0	0	0.245395	0	0	0	0	0	0	0	0	0	0	0	0	0
D007888	0	0	0	0	0	0	0	0	0	0	0	0	0	0	0.117519	0	0	0	0	0	0	0.297437	0.461985	0	0	0	0	0	0	0	0	0	0	0	0	0.185822	0	0	0	0	0	0	0	0	0	0	0	0	0
D004775	0	0	0	0	0	0	0	0	0	0	0	0	0	0	0	0	0	0	0	0	0	0	0	0	0	0	0	0	0	0	0	0	0	0	0	0	0	0	0	0	0	0	0	0	0	0	0	0	0
D017566	0	0	0	0	0	0	0	0	0	0	0	0	0	0	0	0	0	0	0	0	0	0	0	0	0	0	0	0	0	0	0	0	0	0	0.157094	0	0	0	0	0	0	0	0	0	0	0	0	0	0
D007947	0	0	0	0	0	0	0	0	0	0	0	0	0	0	0	0	0	0	0	0	0	0	0	0	0	0	0	0	0	0	0	0	0	0	0	0	0	0	0	0	0	0	0	0	0.128121	0	0	0	0
D006950	0	0	0	0	0	0	0	0	0	0	0	0	0	0	0.139911	0	0	0	0	0	0	0	0	0.286949	0	0	0	0	0	0	0	0	0	0	0	0	0	0	0	0	0	0	0	0	0	0	0	0	0
D003141	0	0	0	0	0	0	0	0	0	0	0	0	0	0	0	0	0	0	0	0	0	0	0	0.175047	0.567962	0	0	0	0	0	0	0	0	0	0	0	0.304993	0	0	0	0	0	0	0	0	0	0	0	0
D052018	0	0	0	0	0	0	0	0	0	0	0	0	0	0	0.183917	0	0	0	0	0	0	0	0	0.244726	0	0	0	0	0	0	0	0	0	0	0	0	0	0	0	0	0	0	0	0	0	0	0	0	0
D002481	0	0	0	0	0	0	0	0	0	0	0	0	0	0	0	0	0	0	0	0	0	0	0	0	0.323019	0	0	0	0	0	0	0	0	0	0	0	0	0	0	0	0	0	0	0	0	0	0	0	0
D000505	0	0	0	0	0	0	0	0	0	0	0	0	0	0	0	0	0	0	0	0	0	0.219133	0	0	0	0.818868	0	0	0	0.259054	0	0	0	0	0.172464	0	0	0	0	0	0	0	0	0	0	0	0	0	0
D006402	0	0	0	0	0	0	0	0	0	0	0	0	0	0	0	0	0	0	0	0	0	0	0	0	0.309341	0	0	0	0	0	0	0	0	0	0	0	0.369165	0	0	0	0	0	0	0	0	0	0	0	0
D020288	0	0	0	0	0	0	0	0	0	0.31974	0	0.112324	0	0.284685	0	0	0	0	0.15043	0	0	0	0	0	0.148252	0	0	0	0	0	0	0	0	0	0	0	0	0	0	0	0	0	0	0	0	0	0	0	0
D012857	0	0	0	0	0	0	0.150752	0	0	0	0	0	0	0	0	0	0	0	0	0	0	0	0	0.190224	0	0	0	0	0	0	0	0	0	0	0	0	0	0	0	0	0	0	0	0	0	0	0	0	0
D002037	0	0	0	0	0	0	0	0	0	0	0	0	0	0	0	0	0	0	0	0	0	0	0	0	0	0	0	0	0	0	0	0.3223	0	0	0	0	0	0	0	0	0	0	0	0	0	0	0	0	0
D002295	0	0	0	0	0	0.190879	0	0.164295	0	0.102971	0	0.191505	0	0	0	0	0	0	0	0	0	0	0	0.397412	0.58308	0	0	0	0	0	0	0	0	0	0	0.125587	0.111617	0	0	0.130851	0	0	0	0	0	0	0	0.138012	0
D014657	0	0	0	0	0	0.129557	0	0.105433	0.173618	0	0	0.197429	0	0	0	0	0	0	0	0	0	0	0	0.10265	0.168316	0	0.100588	0	0	0	0	0	0	0	0.116807	0	0	0.172668	0	0	0	0	0	0	0	0	0	0	0
D020521	0	0.100203	0	0.18183	0	0	0	0	0	0.119755	0	0	0	0	0.106078	0.121104	0	0	0	0	0.109989	0	0	0	0.100065	0	0	0	0	0	0	0	0	0	0	0.24558	0	0	0	0	0	0	0	0	0	0	0	0	0
D000740	0	0	0	0	0	0	0	0.162676	0	0	0	0	0	0	0	0	0	0.45091	0	0	0	0	0	0.187339	0.327551	0	0	0.436064	0	0	0	0.22678	0	0	0.105551	0.122792	0	0	0	0	0.127182	0	0	0	0	0	0	0.124326	0
D011115	0	0	0	0	0	0	0	0	0	0	0	0	0	0	0	0.432138	0	0	0	0	0	0	0	0	0.214206	0	0	0	0	0	0	0	0	0	0	0.563047	0	0	0	0	0	0	0	0	0	0	0	0	0
D006222	0	0	0	0	0.728926	0	0	0	0	0.159414	0	0	0	0	0.143905	0	0	0	0	0	0	0	0	0.166587	0.200416	0	0.16638	0	0	0	0	0	0	0	0.331071	0	0	0	0	0	0	0	0	0	0	0	0	0	0
D018192	0	0	0	0	0	0	0	0	0	0	0	0	0	0	0	0	0	0.158167	0	0	0	0	0	0.167056	0.142525	0	0	0.429838	0	0	0	0	0	0	0	0	0.155419	0.1631	0	0	0	0	0	0.121529	0	0	0	0	0
D011051	0	0	0	0	0	0	0	0	0	0	0	0	0	0	0	0	0	0	0	0	0.238093	0	0.320791	0	0.170613	0	0	0	0	0	0	0	0	0	0.173491	0	0	0	0	0	0	0	0	0	0	0	0	0	0
D005935	0	0	0	0	0	0	0	0	0	0	0	0	0	0	0	0	0	0	0	0	0	0	0	0.157536	0	0	0	0	0	0	0	0	0	0.185327	0	0	0	0	0	0	0	0	0	0	0	0	0	0	0
D005530	0	0	0	0	0	0	0	0	0	0	0	0	0	0	0	0.142752	0	0	0	0	0.108879	0	0.136154	0	0	0	0	0	0	0	0	0	0	0	0	0	0	0	0	0	0	0	0	0	0	0	0	0	0
D002836	0	0	0	0	0	0	0	0	0	0	0	0	0	0	0	0	0	0	0	0	0	0	0	0	0	0	0	0	0	0	0	0	0	0	0	0	0	0	0	0	0	0	0	0	0	0	0	0	0
D010190	0	0	0	0	0	0.26139	0	0.795912	0	0	0	0.459312	0	0	0	0	0	0	0	0	0	0	0	0.37889	0.339434	0	0.175405	0	0.135667	0	0	0	0	0	0	0.123547	0.188797	0.497408	0	0	0	0	0	0	0	0	0	0.133501	0
D006467	0	0	0	0	0	0	0	0	0	0	0	0	0	0	0	0	0	0	0	0	0	0	0	0	0.263904	0	0	0	0	0	0	0	0	0	0	0	0	0	0	0	0	0	0	0	0	0	0	0	0
D055959	0	0	0	0	0	0	0	0	0	0	0	0	0	0	0	0	0	0	0	0	0	0	0	0	0	0	0	0	0	0	0	0	0	0	0	0	0	0	0	0	0	0	0	0	0	0	0	0	0
D009771	0	0	0	0.29859	0	0	0	0	0	0	0	0	0	0	0.341436	0	0	0	0	0	0	0	0	0	0	0	0	0	0	0	0	0	0.290327	0	0	0	0	0	0	0	0	0	0	0	0	0	0	0	0
D003027	0	0	0	0	0	0	0	0	0	0	0	0	0	0	0	0	0	0	0	0	0	0	0	0.111701	0	0	0	0	0	0	0	0	0	0	0	0	0	0	0	0	0	0	0	0	0	0	0	0	0
D020790	0	0	0	0	0	0	0	0	0	0	0	0	0	0	0.108401	0	0	0	0	0	0	0	0	0	0	0	0	0	0	0	0	0	0	0	0	0	0	0	0	0	0	0	0	0	0	0	0	0.212818	0
D019578	0	0	0	0.185419	0	0	0	0	0	0	0	0	0	0	0	0	0	0	0	0	0.375885	0	0	0	0	0	0	0	0	0	0	0	0	0	0	0	0	0	0	0	0	0	0	0	0	0	0	0	0
D009669	0	0	0	0	0	0	0	0	0	0	0	0	0	0	0	0	0	0	0	0	0	0.232135	0	0	0.139527	0	0	0	0	0	0	0	0	0.282884	0.22185	0	0	0	0	0	0	0	0	0	0	0	0	0	0
D010182	0	0	0	0	0	0	0	0	0	0	0	0	0	0	0	0	0.334889	0	0	0	0	0	0	0.300286	0.283712	0	0	0	0	0	0	0	0	0	0	0.139085	0	0.536368	0	0.104234	0	0	0	0	0	0	0	0.135161	0
D005922	0	0	0	0	0	0	0	0	0	0	0	0	0	0	0	0	0	0	0	0	0	0	0	0	0.113813	0	0	0	0	0	0	0	0	0	0	0	0	0	0	0.27355	0	0	0	0	0	0	0	0	0
D002446	0	0	0	0	0	0.102679	0	0.220735	0	0	0	0.367331	0	0	0	0	0.246944	0	0	0	0.12798	0	0	0.240842	0.258268	0	0	0	0.262253	0	0	0	0	0	0	0.104077	0.414147	0.189013	0	0	0	0	0	0	0	0	0	0.250286	0
D007238	0	0	0	0	0	0	0	0	0	0	0	0	0	0	0	0	0	0	0	0	0	0	0	0.104611	0.2626	0	0	0	0	0	0	0	0	0.118524	0	0	0	0	0	0	0	0	0	0	0	0	0	0	0
D018882	0	0	0	0	0	0.151988	0	0	0	0	0	0	0	0	0	0	0	0.167026	0	0	0	0	0	0.155642	0.435078	0	0	0	0	0	0	0	0	0	0	0.20032	0	0	0	0	0	0.101419	0.110189	0	0	0	0	0	0
D014786	0	0	0	0	0	0	0	0	0	0	0	0	0	0	0	0	0	0	0	0	0	0	0	0	0	0	0	0	0	0	0	0	0	0.474307	0	0	0	0	0	0	0	0	0	0	0	0	0	0	0
D003865	0	0	0	0.558467	0	0	0	0	0	0	0	0	0	0	0.844747	0	0	0	0	0	0	0	0	0.147348	0.12437	0	0	0	0	0	0	0	0.210385	0	0.114587	0.113153	0	0.11324	0	0	0	0	0	0	0	0	0	0.128354	0
D000756	0	0	0	0	0	0	0	0.310271	0	0	0	0	0	0	0	0	0	0	0	0	0.41556	0	0	0	0.172482	0	0	0	0	0	0	0	0	0	0.178312	0	0	0	0	0	0	0	0	0	0	0	0	0	0
D001289	0	0	0	0.181804	0	0	0	0	0	0	0	0	0	0	0.227341	0	0	0	0	0	0	0.176537	0	0	0	0	0	0	0	0	0	0	0.111593	0	0.149287	0	0	0	0	0	0	0	0	0	0	0	0	0	0
D012174	0	0	0	0	0.103027	0	0	0	0	0.305433	0	0	0.134493	0	0.118536	0.10424	0	0	0.148478	0	0.110559	0.675902	0	0	0	0	0.161447	0	0	0	0	0	0	0.47421	0.264773	0.117543	0	0	0	0	0.214449	0	0	0	0	0	0	0	0
D009081	0	0	0	0	0	0	0	0	0	0	0	0	0	0	0.176157	0	0	0	0	0	0	0	0	0	0	0	0	0	0	0	0	0	0	0	0	0	0	0	0	0	0	0	0	0	0	0	0	0	0
D007592	0	0	0	0	0	0	0	0	0	0	0	0	0	0	0	0	0	0	0	0	0	0	0	0.129716	0.149216	0	0	0	0	0	0	0	0	0	0.212752	0.419212	0	0	0	0	0	0	0	0	0	0	0	0	0
D015674	0	0	0	0	0	0	0	0	0	0	0	0	0	0	0.128229	0	0	0	0	0	0	0	0	0	0	0	0	0	0	0	0	0	0	0	0	0	0	0	0	0	0	0	0	0	0	0	0	0	0
D010243	0	0	0	0	0	0	0	0	0	0	0	0	0	0	0	0	0	0	0	0	0	0	0	0	0	0	0	0	0	0	0	0	0	0	0	0	0	0	0	0	0	0	0	0	0	0	0	0	0
D005918	0	0	0	0	0	0	0	0	0	0	0	0	0	0	0	0	0	0	0	0	0	0	0	0	0	0	0	0	0	0	0	0	0	0	0	0	0	0	0	0	0	0	0	0	0	0	0	0	0
D015179	0	0	0	0	0	0.144402	0	0.257892	0	0	0	0.302805	0	0	0.121032	0	0.204221	0	0	0	0	0	0	0.44332	0.421883	0.16002	0	0	0.228151	0	0	0	0	0	0	0	0.335507	0.250666	0	0	0	0	0.107521	0	0	0	0	0.165655	0
D003876	0	0	0	0	0	0	0	0	0	0	0	0	0	0	0	0	0	0	0	0	0	0	0	0	0	0	0	0	0	0	0	0	0	0	0	0	0	0	0	0	0	0	0	0	0	0	0	0.142689	0
D055728	0	0	0	0	0	0.401085	0	0.228072	0	0	0	0.223043	0	0	0	0	0	0.153337	0	0	0	0	0	0.22584	0.479865	0.187442	0	0.240078	0	0.178253	0	0	0	0	0.121353	0.142649	0.277534	0.433907	0	0	0	0.122132	0.163525	0.104643	0	0	0	0.169778	0
D015499	0	0	0	0	0	0	0	0	0	0	0	0	0	0	0	0	0	0	0	0	0	0	0	0	0	0	0	0	0	0	0	0	0	0	0	0	0	0	0	0	0	0	0	0	0	0	0	0	0
D000506	0	0	0	0	0	0	0	0	0	0	0	0	0	0	0.15471	0	0	0	0	0	0	0	0	0	0.140532	0	0	0	0	0	0	0	0	0	0	0	0	0	0	0	0	0	0	0	0	0	0	0	0
D014923	0	0	0	0	0	0	0	0	0.206508	0	0	0.167332	0	0	0	0	0	0	0	0	0	0	0	0.180325	0.224513	0	0	0	0	0	0	0	0	0	0.163841	0	0.513902	0	0	0	0	0	0	0	0	0	0	0	0
D000224	0	0	0	0	0	0	0	0.270097	0	0.15463	0	0	0	0	0.151863	0	0	0	0	0	0	0	0	0.347017	0.486304	0	0	0	0	0	0	0	0	0	0.163032	0	0	0	0	0	0	0	0	0	0	0	0	0	0
D005168	0	0	0	0	0	0	0	0	0	0	0	0	0	0	0	0	0	0	0	0	0	0	0	0	0	0	0	0	0	0	0	0	0	0	0	0	0	0	0	0	0	0	0	0	0	0	0	0	0
D007418	0	0	0	0	0	0.166241	0	0.252844	0	0	0	0	0	0	0	0	0.199509	0	0	0	0	0	0	0.187153	0.193629	0	0	0	0	0	0	0	0	0	0	0.142191	0	0	0	0	0	0	0	0	0	0	0	0.147088	0
D002819	0	0	0	0	0	0	0	0	0	0	0	0	0	0	0	0	0	0	0	0	0	0	0	0	0	0	0	0	0	0	0	0	0	0	0	0	0	0	0	0	0	0	0	0	0	0	0	0	0
D020078	0	0	0	0	0	0	0	0	0	0	0	0	0	0	0	0	0	0	0	0	0	0	0	0	0	0	0	0	0	0	0	0	0	0	0	0	0	0	0	0	0	0	0.124484	0	0	0	0	0	0
D001014	0	0	0	0	0	0.368596	0.488085	0.121167	0	0	0	0.192344	0	0	0	0	0	0	0	0	0	0	0	0.25526	0.212538	0	0	0.16534	0	0	0	0.352787	0	0	0.310715	0.147572	0	0	0	0	0	0	0.326853	0.464557	0.386845	0	0	0.115236	0
D002658	0	0	0	0.131033	0.297626	0	0	0	0	0	0.16551	0	0	0	0.219838	0	0	0	0.136604	0	0	0.551956	0.174634	0	0	0	0	0	0	0	0	0	0.126474	0	0.515979	0.106077	0	0.12883	0	0	0.614596	0	0	0.16315	0	0.144287	0	0	0
D008181	0	0	0	0	0	0	0	0	0	0	0	0	0	0	0	0	0	0	0	0	0	0	0	0	0	0	0	0	0	0	0	0	0	0	0	0	0	0	0	0	0	0	0	0	0	0	0	0	0
D009447	0	0.146771	0	0	0	0	0	0	0	0	0	0	0	0.740405	0	0	0	0.122505	0	0	0.252695	0	0	0	0.189016	0	0.196336	0.119427	0.12394	0	0	0	0	0	0.149741	0.113294	0	0.134265	0	0	0	0	0	0	0	0	0	0	0
D004684	0	0	0	0	0.309803	0.114729	0	0.114077	0	0.221561	0	0	0	0	0.140301	0	0	0	0	0	0	0	0.166393	0.134551	0.511085	0	0	0	0	0	0	0	0	0	0	0.161141	0	0	0	0	0	0	0	0	0	0	0	0.160504	0
D000741	0	0	0	0	0	0.206774	0	0.205009	0	0	0	0	0	0	0	0	0	0	0	0	0	0	0	0	0.417402	0.104768	0	0	0	0.201156	0	0	0	0	0.219682	0	0	0.389982	0	0	0	0	0	0	0	0	0	0	0
D006316	0	0	0	0	0	0	0	0	0	0	0	0	0	0	0	0	0	0	0	0	0	0	0	0	0	0	0	0	0	0	0	0	0	0	0	0	0	0	0	0	0	0	0	0	0	0	0	0	0
D007965	0	0	0	0	0	0	0	0	0	0	0	0	0	0.148752	0	0.13102	0	0	0	0	0	0	0.25867	0	0	0	0	0	0	0	0	0	0	0	0	0	0	0	0	0	0	0	0	0	0	0	0	0	0
D008068	0	0	0	0	0	0	0	0.1375	0	0.102873	0	0.109353	0	0	0.143778	0.132032	0	0	0	0	0	0	0	0.253322	0.203398	0.230345	0.255445	0.145029	0	0	0	0	0	0	0.229144	0.222154	0	0	0	0	0.115873	0	0	0.125382	0	0	0	0	0
D005271	0	0	0	0	0	0	0	0	0	0	0	0	0	0	0	0	0	0	0	0	0	0	0	0.136164	0.156993	0	0	0	0	0	0	0	0	0	0.126491	0.363649	0	0	0	0	0	0	0	0	0	0	0	0	0
D001855	0	0	0	0	0	0	0	0	0	0	0	0	0	0	0	0	0	0	0	0	0	0	0	0	0.208415	0	0	0	0	0	0	0	0	0	0	0	0	0	0	0	0	0	0	0	0	0	0	0	0
D054220	0	0	0	0	0.839234	0	0	0	0	0	0	0	0	0	0.136975	0	0	0	0	0	0	0.282065	0	0	0	0	0	0	0	0	0	0	0	0	0.208948	0	0	0	0	0	0	0	0	0	0	0	0	0	0
D007642	0	0	0	0	0	0	0	0	0	0	0	0	0	0	0	0	0	0	0	0	0	0.243392	0	0	0	0	0	0	0	0	0	0	0	0	0.176399	0	0	0.125857	0	0	0.127199	0	0	0	0	0	0	0.15301	0
D019694	0	0	0.101989	0	0	0	0	0.744366	0	0	0	0	0	0	0	0	0	0	0	0	0	0	0	0.137607	0.228073	0	0	0	0	0	0	0	0	0	0	0	0.204211	0	0	0.125753	0	0	0	0	0	0	0	0	0
D000856	0	0	0	0	0	0	0	0	0	0	0	0	0	0	0.132679	0	0	0	0	0	0	0	0	0.103129	0	0	0	0	0	0	0	0	0	0	0	0	0	0	0	0	0	0	0	0	0	0	0	0	0
D007968	0	0	0	0	0	0	0	0	0	0	0	0	0	0	0	0.105191	0	0	0	0	0	0	0	0	0	0	0	0	0	0	0	0	0	0	0	0	0	0	0	0	0	0	0	0	0	0	0	0	0
D002357	0	0	0	0	0	0	0	0	0	0	0	0	0	0	0	0	0	0	0	0	0	0	0	0	0.113253	0	0	0	0	0	0	0	0	0	0.273795	0	0	0	0	0	0	0	0	0.172795	0	0	0	0	0
D000699	0	0	0	0	0	0	0	0	0	0	0	0	0	0	0.152204	0	0	0	0	0	0	0	0.134669	0	0.105078	0	0	0	0	0	0	0	0.127023	0	0	0.261523	0	0	0	0	0	0	0	0	0	0	0	0	0
D016410	0	0	0	0	0	0	0	0	0	0	0	0	0	0	0	0	0	0	0	0	0	0	0	0.136983	0.266933	0	0	0	0	0	0	0	0	0	0	0	0	0	0	0	0	0	0	0	0	0	0	0.177483	0
D018284	0	0	0	0	0	0	0	0.197056	0	0.225006	0	0	0	0	0	0	0	0	0	0	0	0	0	0	0.16164	0	0	0	0	0	0	0	0	0	0	0	0	0.157957	0	0	0	0	0	0	0	0	0	0.110972	0
D005767	0	0	0	0	0	0.179666	0	0	0	0	0	0	0	0	0	0	0	0	0	0	0	0	0	0.383219	0.263886	0	0	0	0	0	0	0	0	0	0	0.105115	0	0	0	0	0	0	0	0	0	0	0	0	0
D017202	0	0	0	0	0	0	0.161659	0	0	0	0	0	0	0	0	0	0	0	0	0	0	0	0	0	0	0	0.150017	0	0	0	0	0.882759	0	0	0	0	0	0	0	0	0	0	0	0.52356	0.133522	0	0	0	0
D011127	0	0	0	0	0	0	0	0	0	0	0	0	0	0	0	0	0	0	0	0	0	0	0	0	0	0	0	0	0	0	0	0	0	0	0	0	0	0	0	0	0	0	0	0	0	0	0	0	0
D003882	0	0	0	0	0	0	0	0	0	0	0	0	0	0	0	0.383366	0	0.109539	0	0	0	0	0	0.103464	0.161944	0.115558	0	0.115584	0	0	0	0	0	0	0.135004	0.532617	0	0	0	0	0	0	0	0	0	0	0	0.132872	0
D002312	0	0	0	0	0	0.178662	0.757464	0	0	0	0	0	0	0	0	0	0	0	0	0	0	0	0	0	0	0	0.110045	0.103301	0	0	0	0.344489	0	0	0.269146	0	0	0	0	0	0	0	0.113582	0.925635	0.617386	0	0	0	0
D043183	0	0	0	0	0	0	0	0	0	0	0	0	0	0	0	0	0	0	0	0	0	0	0	0.169155	0	0	0	0	0	0	0	0	0	0	0	0	0	0	0	0	0	0	0	0	0	0	0	0	0
D003095	0	0	0	0	0	0	0	0	0	0	0	0	0	0	0	0	0	0	0	0	0	0	0	0.128856	0.32635	0	0	0	0	0	0	0	0	0	0.24375	0	0	0	0	0.110284	0	0	0	0	0	0	0	0	0
D003884	0	0	0	0	0	0	0	0	0	0	0	0	0	0	0	0	0	0	0	0	0	0	0	0	0.280192	0.487467	0	0	0	0.404157	0	0	0	0	0.219048	0	0	0	0	0	0	0	0	0	0	0	0	0	0
D011469	0	0	0	0	0	0	0	0	0	0	0	0	0	0	0	0	0	0	0	0	0	0	0	0.153171	0.219048	0	0	0	0	0	0	0	0	0	0	0	0	0	0	0	0	0	0	0	0	0	0	0	0
D000747	0	0	0	0	0	0	0	0	0	0	0	0	0	0	0	0	0	0	0	0	0	0	0	0	0	0	0	0	0	0	0	0	0	0	0	0	0	0	0	0	0	0	0	0	0	0	0	0	0
D015323	0	0	0	0	0	0	0	0	0	0	0	0	0	0	0	0	0	0	0	0	0	0	0.878369	0	0	0	0	0	0	0	0	0	0	0	0	0	0	0	0	0	0	0	0	0	0	0	0	0	0
D018917	0	0	0	0	0	0	0	0	0	0.530591	0.351516	0	0	0	0	0	0	0	0	0	0	0	0	0	0	0	0	0	0	0	0	0	0	0.724833	0	0	0	0	0	0	0	0	0	0	0	0	0	0	0
D014973	0	0	0	0.11136	0	0	0	0	0	0	0	0	0	0	0.126884	0	0	0	0	0	0	0	0	0.117883	0.237947	0	0	0	0	0	0	0	0	0	0.295928	0.118551	0.159253	0	0	0	0	0	0	0	0	0	0	0	0
D002547	0	0	0	0	0.109082	0	0	0	0	0	0	0	0	0	0	0	0	0	0	0	0.111549	0.182347	0	0	0	0	0	0	0	0	0	0	0	0	0	0.169255	0	0	0	0	0.201661	0	0	0	0	0	0	0	0
D004402	0	0	0	0	0	0	0	0	0	0	0	0	0	0	0.168568	0.159988	0	0.196615	0	0	0.197939	0	0.119676	0.137571	0.310307	0	0	0	0	0	0	0	0	0	0	0	0	0	0	0	0	0	0	0	0	0	0	0	0
D007674	0	0	0	0	0	0	0	0.143484	0	0	0	0	0	0	0	0	0	0	0	0	0	0	0	0	0.150112	0	0	0	0	0	0	0	0	0	0	0	0	0	0	0.594442	0	0	0	0	0	0	0	0.130133	0
D050171	0	0	0	0	0	0.115148	0	0.105808	0	0.135306	0	0	0	0	0.177362	0	0	0	0	0	0	0	0	0.340253	0	0	0	0	0	0	0	0	0	0	0	0	0	0	0	0.114854	0	0	0	0	0	0	0	0.1115	0
D020274	0	0	0	0	0	0	0	0	0	0	0	0	0	0	0.12156	0	0	0	0	0	0	0	0	0	0	0	0	0	0	0	0	0	0	0	0	0	0	0	0	0	0	0	0	0	0	0	0	0	0
D008231	0	0	0	0	0	0	0	0.13228	0	0	0	0	0	0	0.133693	0	0	0	0	0	0	0	0	0.175314	0.268289	0	0	0	0	0	0	0	0	0	0	0	0.331159	0.379908	0	0	0	0	0	0	0	0	0	0.2042	0
D012848	0	0	0	0	0	0	0.215342	0	0	0	0	0	0	0	0	0	0	0	0	0	0	0	0	0	0	0	0	0	0	0	0	0	0	0	0	0	0	0	0	0	0	0.138674	0	0	0	0	0	0	0
D008067	0	0	0	0	0.109204	0	0.102151	0.22229	0	0.178014	0	0.376497	0	0	0.100959	0.132648	0	0	0	0	0	0	0	0.266512	0.307652	0.227493	0	0.150029	0	0.194319	0	0	0	0	0.339552	0.314354	0	0	0	0	0	0	0	0.124733	0	0	0	0	0
D009901	0	0	0	0	0	0	0	0	0	0.715017	0	0	0.31683	0	0	0	0	0	0	0	0	0.262549	0	0	0	0	0	0	0	0	0	0	0	0.782994	0	0	0	0	0	0	0	0	0	0	0	0	0	0	0
D005532	0	0.1569	0	0	0	0	0	0	0	0	0	0	0	0	0.140333	0.145551	0	0	0	0	0	0.80992	0.109808	0	0	0	0.192468	0	0	0.105592	0	0	0.110425	0	0.577602	0.209424	0	0	0	0	0.647589	0	0	0.191079	0	0	0	0	0
D003643	0	0	0	0.140928	0	0	0	0	0	0	0	0	0	0	0	0	0	0	0	0	0	0	0	0	0	0	0	0	0	0	0	0	0	0	0	0	0	0	0	0	0	0	0	0	0	0	0	0	0
D002779	0	0	0	0	0	0	0	0.607204	0	0	0	0	0	0	0	0	0	0	0	0	0	0	0	0	0.1441	0	0	0	0	0	0	0	0	0	0	0	0	0	0	0	0	0	0	0	0	0	0	0.123725	0
D014806	0	0	0	0.23361	0	0	0	0	0	0	0	0	0	0	0	0	0	0	0	0	0	0.15469	0	0	0	0	0	0	0	0	0	0	0	0	0	0	0	0	0	0	0	0	0	0	0	0	0	0	0
D006819	0	0	0	0	0	0	0	0	0	0	0	0	0	0	0	0	0	0	0	0	0	0	0	0	0.108033	0	0	0.16334	0	0	0	0	0	0	0	0	0	0	0	0	0	0	0	0	0	0	0	0	0
D055534	0	0	0	0.176543	0	0	0	0	0	0	0	0	0	0	0.105814	0.302225	0	0	0	0	0	0	0	0	0	0	0	0	0	0	0	0	0.146373	0	0	0.415905	0	0	0	0	0	0.318953	0	0	0	0	0	0	0
D000026	0	0	0	0	0	0	0	0	0	0	0	0	0	0	0.133655	0	0	0	0	0	0	0.212478	0	0	0.1609	0	0	0	0	0	0	0	0	0	0	0	0	0	0	0	0	0	0	0	0	0	0	0	0
D017086	0	0	0	0	0	0	0	0.147713	0	0	0	0	0	0	0	0	0	0.199907	0	0	0	0	0	0	0.217248	0	0.186085	0.235866	0	0	0	0	0	0	0.108771	0.112332	0.123536	0	0	0.174149	0	0	0	0	0	0	0	0.10318	0
D016481	0	0	0	0	0	0	0	0	0	0	0	0	0	0	0	0	0	0	0	0	0	0	0	0.238066	0	0	0	0	0	0	0	0	0	0	0	0	0	0	0	0	0	0	0	0	0	0	0	0	0
D006975	0	0	0	0	0	0.109336	0	0.353693	0	0	0	0	0	0	0	0	0.855358	0.18755	0	0	0	0	0	0.503074	0.132379	0	0.159564	0.218825	0	0	0	0	0	0	0	0	0	0	0	0	0	0	0	0	0	0	0	0	0
D013584	0	0	0	0	0	0	0.141744	0	0	0	0	0	0	0	0	0	0	0	0	0	0	0	0	0	0	0	0	0.151093	0	0	0	0	0	0	0.184029	0.184042	0	0	0	0	0	0	0	0	0	0	0	0	0
D056486	0	0	0	0	0	0	0	0.797335	0	0	0	0.158741	0	0	0	0	0	0	0	0	0	0	0	0.117814	0.266436	0	0	0	0	0	0	0	0	0	0	0	0	0.71079	0	0	0	0	0.111904	0	0	0	0	0	0
D009134	0	0	0	0	0	0	0	0	0	0	0	0	0	0	0	0.568045	0	0	0.145261	0	0.147029	0	0.172849	0	0	0	0.154466	0	0	0	0	0	0	0	0.134202	0.634509	0	0	0	0	0	0.464146	0	0	0	0	0	0.114149	0
D015663	0	0.187978	0	0	0	0.117554	0	0.142419	0	0	0	0	0	0	0.115173	0	0	0	0	0	0	0	0	0.200616	0.122474	0.122451	0.32029	0	0	0	0	0	0	0	0.282324	0.250456	0	0.183666	0	0	0	0.31407	0	0	0	0	0	0.198456	0
D005094	0	0	0	0	0	0	0	0	0	0	0.17431	0	0	0	0	0	0	0	0	0	0	0	0	0	0.144757	0	0	0	0	0	0	0	0	0	0	0	0	0	0	0	0	0	0	0	0	0	0	0	0
D003110	0	0	0	0	0	0.193122	0	0.251253	0	0	0	0.31748	0	0	0.112804	0	0.180905	0.11369	0	0	0	0	0	0.5444	0.369165	0.108961	0.108127	0.119476	0.157833	0	0	0	0	0	0	0.13092	0.230752	0.347578	0	0	0	0	0.114353	0	0	0	0	0.155845	0
D018636	0	0	0	0	0	0	0	0	0	0	0	0	0	0	0	0	0	0	0	0	0	0	0	0	0	0	0	0	0	0	0	0	0	0	0	0	0	0	0	0	0	0	0	0	0	0	0	0	0
D058065	0	0	0	0	0	0	0	0	0	0.104403	0	0	0	0	0.108356	0	0	0	0	0	0	0	0	0.250433	0	0	0	0	0	0	0	0	0	0	0	0	0	0	0	0	0	0	0	0	0	0	0	0	0
D008113	0	0	0.19851	0	0	0.339137	0	0.811243	0	0	0	0.485897	0	0	0	0	0.228387	0.141896	0	0	0	0	0	0.36989	0.514964	0.110927	0.205895	0.152355	0.164137	0	0	0	0	0	0.10266	0.127232	0.149871	0.676475	0	0	0	0	0.148853	0	0	0	0	0.160599	0
D010001	0	0	0	0	0	0.100101	0	0	0	0.143394	0	0	0	0	0	0	0	0	0	0	0	0.390618	0	0.108494	0.256137	0	0.411263	0	0	0	0	0	0	0	0.216612	0.232934	0	0.121977	0	0	0	0.274649	0	0	0	0	0	0.165365	0
D017624	0	0	0	0	0	0	0	0	0	0.111634	0	0	0	0	0.174215	0	0	0	0	0	0	0.380905	0	0.188326	0	0.247693	0	0	0	0	0	0	0	0	0	0	0	0	0	0	0	0	0	0	0	0	0	0	0
D006226	0	0	0	0	0	0	0	0	0	0	0	0	0	0	0	0	0	0	0	0	0	0	0	0	0	0	0	0	0	0	0	0	0	0	0	0	0	0	0	0	0	0	0	0	0	0	0	0.432454	0
D016750	0	0	0	0	0	0	0	0	0	0	0	0	0	0.217974	0	0	0	0	0	0	0	0	0	0	0	0	0	0	0	0	0	0	0	0	0	0	0	0	0	0	0	0	0	0	0	0	0	0	0
D030342	0	0	0	0	0	0	0	0	0	0	0	0	0	0	0.206151	0	0	0	0	0	0	0	0.146001	0	0.174076	0	0	0	0	0	0	0	0	0	0	0	0	0	0	0	0	0	0	0	0	0	0	0	0
D008286	0	0	0	0	0	0	0	0	0	0	0	0	0	0	0	0	0	0	0	0	0	0	0	0.182687	0.192977	0	0	0	0	0	0	0	0	0	0	0	0	0	0	0	0	0	0	0	0	0	0	0	0
D018231	0	0	0	0	0	0	0	0.139401	0	0	0	0	0	0	0	0	0	0	0	0	0	0	0	0.172725	0.160406	0	0	0	0	0	0	0	0	0	0	0.241933	0	0	0	0	0	0	0	0	0	0	0	0	0
D008088	0	0	0	0	0.193573	0	0	0.170505	0	0	0	0	0	0	0.115464	0	0	0	0	0	0	0	0	0.194445	0.436322	0	0	0	0	0	0	0	0	0	0.123254	0.164089	0	0	0	0	0	0	0	0	0	0	0	0.125704	0
D003680	0	0	0	0	0	0	0	0	0	0	0	0	0	0	0	0	0	0	0	0	0	0	0	0.295744	0.120911	0	0	0	0	0	0	0	0	0	0	0.14297	0	0	0	0	0	0	0	0	0	0	0	0	0
D008375	0	0	0	0	0	0	0	0	0	0	0	0	0	0	0.265606	0	0	0	0	0	0	0	0	0	0.126144	0	0	0	0	0	0	0	0	0	0	0.179635	0	0	0	0	0	0	0	0	0	0	0	0	0
D006417	0	0	0	0	0	0	0	0	0	0	0	0	0	0	0	0	0	0	0	0	0	0	0	0	0	0	0	0	0	0	0	0	0	0	0.104664	0	0	0	0	0.369718	0	0	0	0	0	0	0	0	0
D011681	0	0	0	0	0	0	0	0	0	0	0	0	0	0	0	0	0	0	0	0	0	0	0	0	0	0	0	0	0	0	0	0	0	0	0	0	0	0	0	0	0	0	0	0	0	0	0	0	0
D003711	0	0.308903	0	0.125043	0	0	0	0	0	0.321554	0	0	0	0	0.16377	0.255233	0	0.104076	0.422992	0	0.368522	0.259972	0.170753	0	0.193952	0	0.187799	0	0	0	0	0	0	0.165707	0.242088	0.461191	0	0.139775	0	0	0.21487	0.20869	0.166666	0	0	0	0	0.139619	0
D007806	0	0	0	0.174898	0	0	0	0	0	0	0	0	0	0	0	0	0	0	0	0	0	0	0	0	0	0	0	0	0	0	0	0	0	0	0	0	0	0	0	0	0	0	0	0	0	0	0	0	0
D012598	0	0	0	0.262416	0	0	0	0	0	0	0	0	0	0	0	0	0	0	0	0	0	0	0	0	0	0	0	0	0	0	0	0	0	0	0	0	0	0	0	0	0	0	0	0	0	0	0	0	0
D020961	0	0	0	0.351709	0	0	0	0	0	0	0	0	0	0	0.457216	0	0	0	0	0	0.103351	0	0	0	0	0	0	0	0	0	0	0	0.120656	0.162192	0	0	0	0	0	0	0	0	0	0	0	0.103863	0	0	0
D008850	0	0	0	0	0	0	0	0	0	0	0.402926	0	0	0	0.15007	0	0	0	0	0	0	0.767796	0	0	0	0	0	0	0	0	0	0	0	0.301567	0.545489	0.105012	0	0	0	0	0	0	0	0	0	0	0	0	0
D004612	0	0	0	0	0	0	0	0	0	0	0	0	0	0	0	0	0	0	0	0	0	0	0	0	0	0	0	0	0	0	0	0	0	0	0	0	0	0.56957	0	0	0	0	0	0	0	0	0	0	0
D016111	0	0	0	0	0	0	0	0	0	0	0	0	0	0	0.122857	0	0	0	0	0	0	0	0	0	0	0	0	0	0	0	0	0	0	0	0	0	0	0	0	0	0	0	0	0	0	0	0	0	0
D001284	0	0	0	0.815629	0	0	0	0	0	0.146173	0	0	0	0	0.310072	0	0	0	0	0	0.36792	0.126211	0	0	0	0	0	0	0	0	0	0	0.168577	0	0.12703	0	0	0	0	0	0	0	0	0	0	0.262627	0	0	0
D007890	0	0	0	0	0	0	0.227783	0.309452	0	0	0	0	0	0	0	0	0	0	0	0	0	0	0	0.353275	0.304906	0	0	0	0	0	0	0	0	0	0.171331	0.147791	0	0	0	0	0	0	0	0.209321	0	0	0	0.171463	0
D000568	0	0	0	0	0	0	0	0.107856	0	0.126995	0	0	0	0	0.17327	0	0	0	0	0	0	0	0	0.191704	0.110082	0.708168	0	0	0	0.358066	0	0	0	0	0.101207	0	0	0	0	0	0	0	0	0	0	0	0	0.116913	0
D017093	0	0	0	0	0	0	0.101081	0	0	0	0	0	0	0	0	0	0	0.226603	0	0	0	0	0	0.157481	0.313114	0	0	0.200778	0	0	0	0	0	0	0	0	0	0	0	0	0	0	0	0.150359	0	0	0	0	0
D000141	0	0	0	0	0.105019	0	0	0	0	0	0	0	0	0	0	0	0	0	0	0	0	0	0	0	0.181955	0	0	0	0	0	0	0	0	0	0	0.146749	0.144539	0.214522	0	0	0	0	0	0	0	0	0	0	0
D006934	0	0	0	0	0.264794	0.169602	0	0	0	0.151325	0	0	0	0	0.248301	0	0	0.126549	0	0	0	0	0	0.319835	0.353262	0	0	0.116652	0	0	0	0	0.115211	0	0.422392	0.194589	0	0	0	0	0	0	0	0.176635	0	0	0	0.454494	0
D010040	0	0	0	0	0	0	0	0	0	0	0	0	0	0	0	0	0	0	0	0	0	0	0	0	0	0	0	0	0	0	0	0	0	0	0	0	0	0	0	0	0	0	0	0	0	0	0	0	0
D006930	0	0	0	0	0	0	0	0	0	0	0	0	0	0	0	0	0	0	0	0	0	0	0	0	0	0	0	0	0	0	0	0	0	0	0	0	0	0	0	0	0	0	0	0	0	0	0	0	0
D012468	0	0	0	0	0	0.175053	0	0	0	0	0	0	0	0	0	0	0	0	0	0	0	0.159477	0	0.103101	0.222906	0.129496	0.306924	0	0	0	0	0	0	0	0	0	0	0	0	0	0	0	0	0	0	0	0	0	0
D006086	0	0	0	0	0	0.136493	0	0.265185	0	0	0	0.195149	0	0	0	0	0.173891	0	0	0	0	0	0	0.295233	0.391902	0	0	0	0	0	0	0	0	0	0	0.123012	0.394421	0	0	0.162688	0	0	0	0	0	0	0	0.182933	0
D009461	0	0	0	0	0	0	0	0	0	0	0	0	0	0	0	0	0	0	0.113588	0	0	0	0	0	0	0	0	0	0	0	0	0	0	0	0	0.150313	0	0	0	0	0	0	0	0	0	0	0	0	0
D000236	0	0	0	0	0	0.211626	0	0.183609	0	0.73105	0.133672	0.127469	0	0	0.108905	0	0	0	0	0	0	0.178003	0	0.148054	0.23684	0.523236	0.300967	0	0	0.601821	0	0	0	0.290352	0.189993	0.133924	0	0	0	0	0	0.11967	0	0	0	0	0	0.265044	0
D016884	0	0	0	0	0	0.140973	0	0.175468	0	0.136336	0	0	0	0	0.120861	0.148253	0	0	0	0	0.242718	0	0	0.15656	0.325151	0	0	0	0.14373	0	0	0	0	0	0.103955	0.248259	0	0	0	0	0	0	0	0	0	0	0	0.290687	0
D011125	0	0	0	0	0	0.279842	0	0.232653	0	0	0	0.309012	0	0	0.128484	0	0.138083	0	0	0	0	0.494408	0	0.267938	0.205728	0	0	0	0	0.199328	0	0	0	0	0.523104	0.127619	0.104195	0.264184	0	0	0.526568	0	0	0.219771	0	0	0	0.120528	0
D006319	0	0	0	0	0	0	0	0	0	0	0	0	0	0	0	0	0	0	0	0	0	0.171418	0	0	0	0	0.172427	0	0	0	0	0	0	0	0	0	0	0	0	0	0	0	0	0	0	0	0	0	0
D013921	0	0	0	0	0	0	0	0	0	0	0	0	0	0	0	0	0	0	0	0	0	0	0	0	0.216057	0	0	0	0	0	0	0.116622	0	0	0	0	0.577899	0.143848	0	0	0	0	0	0	0	0	0	0	0.146862
D009223	0	0	0	0	0.130221	0	0	0	0	0	0	0	0	0	0.139428	0.349693	0	0.1579	0	0	0.134284	0.262928	0.160763	0	0.109141	0	0	0.168212	0	0	0	0	0	0	0.354056	0.645015	0	0	0	0	0	0	0	0.120621	0	0	0	0	0
D020294	0	0	0	0	0	0	0	0	0	0	0	0	0	0	0	0	0	0	0	0	0	0	0.107175	0	0	0	0	0	0	0	0	0	0	0	0	0	0	0	0	0	0	0	0	0	0	0	0	0	0
D011656	0	0	0	0	0	0	0	0	0	0	0	0	0	0	0	0	0	0.689748	0	0	0	0	0	0.193715	0.178791	0	0.148747	0.884171	0	0	0	0	0	0	0	0	0	0	0	0	0	0	0	0	0	0	0	0	0
D004067	0	0	0	0	0	0	0	0	0	0	0	0	0	0	0	0	0	0	0	0	0	0	0	0	0	0	0	0	0	0	0	0	0	0	0	0	0	0	0	0	0	0	0	0	0	0	0	0	0
D000799	0	0	0	0	0	0	0	0.380147	0	0	0	0	0	0	0	0	0	0	0	0	0	0	0	0.168965	0.283745	0	0	0	0	0	0	0	0	0	0	0	0	0	0	0	0	0	0	0	0	0	0	0	0
D009128	0	0	0	0	0	0	0	0	0	0	0	0	0	0	0	0	0	0	0	0	0	0	0	0	0	0	0	0	0	0	0	0	0	0	0	0.101015	0	0	0	0	0	0	0	0	0	0	0	0	0
D015458	0	0	0	0	0	0	0	0	0	0	0	0	0	0	0	0	0	0	0	0	0	0	0	0.308154	0.218911	0	0	0	0	0	0	0	0	0.165349	0	0	0	0	0	0	0	0	0	0	0	0	0	0	0
D007039	0	0	0	0	0	0	0	0	0	0	0	0	0	0	0	0	0	0	0	0	0	0	0	0	0	0	0	0	0	0	0	0	0	0	0	0	0	0	0	0	0	0	0	0	0	0	0	0	0
D019851	0	0	0	0	0	0.140062	0	0.111892	0	0	0	0	0	0	0.159892	0	0	0.106633	0	0	0	0	0	0.144004	0.171999	0	0	0.118349	0	0	0	0.348197	0	0	0	0	0.170183	0	0	0.145475	0	0	0	0	0	0	0	0	0
D010264	0	0	0	0	0	0	0	0	0	0	0	0	0	0	0	0	0	0	0	0	0	0	0	0	0.203311	0	0	0	0	0	0	0	0	0	0	0	0	0	0	0	0	0	0	0	0	0	0	0	0
D006942	0	0	0	0	0	0	0	0	0	0	0	0	0	0	0	0	0	0	0	0	0	0	0	0	0	0	0	0	0	0	0	0	0	0	0	0	0.182014	0	0	0	0	0	0	0	0	0	0	0	0
D000012	0	0	0	0	0	0	0	0	0	0	0	0	0	0	0	0	0	0	0	0	0	0	0	0	0	0	0	0	0	0	0	0	0	0	0	0	0	0	0	0	0	0	0	0	0	0	0	0	0
D004831	0	0	0	0	0.492596	0	0	0	0	0	0	0	0	0.73974	0.258578	0	0	0	0.482577	0	0.233232	0	0	0	0	0	0	0	0	0	0	0	0	0	0	0.150775	0	0	0	0	0	0	0	0.100072	0	0	0	0	0
D013922	0	0	0	0	0	0.160109	0	0.105722	0	0.204761	0	0	0	0	0	0	0	0	0	0	0	0	0	0.154706	0.374083	0	0	0.17062	0	0	0	0.317933	0	0	0	0.151458	0.310397	0	0	0	0	0.153312	0	0	0	0	0	0	0
D008579	0	0	0	0.171999	0	0	0	0	0	0.729785	0.202652	0	0.106776	0	0.150764	0.10959	0	0	0	0	0.116809	0	0	0	0.221878	0	0	0	0	0	0	0	0	0.411894	0.275296	0.225815	0	0	0	0	0	0	0	0	0	0	0	0	0
D014802	0	0	0	0	0	0	0	0	0	0	0.174813	0	0	0	0.153748	0	0	0	0	0	0	0.133852	0	0.21375	0.19327	0	0	0	0	0	0	0	0	0.281783	0.149336	0	0	0	0	0	0	0	0	0	0	0	0	0	0
D009216	0	0	0	0	0	0	0	0	0	0.264144	0.505447	0	0.924098	0	0	0	0	0	0	0	0	0.309034	0	0	0	0	0	0	0	0	0	0	0	0.424697	0.152917	0	0	0	0	0	0	0	0	0	0	0	0	0	0
D017098	0	0	0	0	0	0	0	0	0	0	0	0	0	0	0	0	0	0	0	0	0	0	0	0	0.125689	0	0	0	0	0	0	0	0	0	0	0	0.727209	0.222247	0	0	0	0	0	0	0	0	0	0	0
D014103	0	0	0	0	0	0	0	0	0	0	0	0	0	0	0	0	0	0	0	0	0	0	0	0	0	0	0	0	0	0	0	0	0	0	0	0	0	0	0	0	0	0	0	0	0	0	0	0	0
D018382	0	0	0	0.115244	0	0	0	0	0	0	0	0	0	0	0.275809	0	0	0	0	0	0	0	0	0	0	0	0	0	0	0	0	0	0.166293	0	0	0	0	0	0	0	0	0	0	0	0	0	0	0	0
D012497	0	0	0	0.16413	0	0	0	0	0	0	0	0	0	0	0	0	0	0	0	0	0	0	0	0	0	0	0	0	0	0	0	0	0	0	0	0	0	0	0	0	0	0	0	0	0	0	0	0	0
D009084	0	0	0	0.101757	0	0	0	0	0	0	0	0	0	0	0	0	0	0	0	0	0	0	0	0	0	0	0	0	0	0	0	0	0	0	0	0	0	0	0	0	0	0	0	0	0	0	0	0	0
D020955	0	0	0	0.171813	0	0	0	0	0	0	0	0	0	0	0	0	0	0	0	0	0	0	0	0	0	0	0	0	0	0	0	0	0	0	0	0	0	0	0	0	0	0	0	0	0	0	0	0	0
D000430	0	0	0	0.206082	0	0	0	0	0	0	0	0	0	0	0.468501	0	0	0	0	0	0	0	0	0	0	0	0	0	0	0	0	0	0.202638	0	0	0	0	0	0	0	0	0	0	0	0	0	0	0	0
D018923	0	0	0	0.133712	0	0	0	0	0	0	0	0	0	0	0	0	0	0	0	0	0	0	0	0	0	0	0	0	0	0	0	0	0	0	0	0.157567	0	0	0	0	0	0	0	0	0	0	0	0	0
D034062	0	0	0	0.269619	0	0	0	0	0	0	0	0	0	0	0.253299	0	0	0	0	0	0.122002	0	0	0	0	0	0	0.143549	0	0	0	0	0	0	0	0	0	0	0	0	0	0	0	0	0	0	0	0	0
D020167	0	0	0	0	0.64867	0	0	0	0	0	0	0	0	0	0	0	0	0	0	0	0	0	0	0	0	0	0	0	0	0	0	0	0	0	0	0	0	0	0	0	0	0	0	0	0	0	0	0	0
D054877	0	0	0	0	0.63548	0	0	0	0	0	0	0	0	0	0.143385	0	0	0	0	0	0	0.708581	0.372171	0	0	0	0	0	0	0.111937	0	0	0	0	0	0	0	0	0	0	0	0	0	0	0	0	0	0	0
D053549	0	0	0	0	0	0.392104	0	0	0	0	0	0	0	0	0	0	0	0	0	0	0	0	0	0	0	0	0.230681	0	0	0	0	0	0	0	0	0	0	0	0	0	0	0	0	0	0	0	0	0	0
D038921	0	0	0	0	0	0.104799	0.180978	0	0	0	0	0	0	0	0	0	0	0	0	0	0	0	0	0	0	0	0	0	0	0	0	0	0	0	0	0	0	0	0	0	0	0	0	0	0	0	0	0	0
D015408	0	0	0	0	0	0.157988	0	0	0	0	0	0	0	0	0	0	0	0	0	0	0	0	0	0.255665	0.287235	0	0	0	0	0	0	0	0	0	0	0	0	0	0	0	0	0	0	0	0	0	0	0	0
D006343	0	0	0	0	0	0.115582	0.717855	0	0	0	0	0	0	0	0	0	0	0	0	0	0	0	0	0.131139	0	0	0	0	0	0	0	0	0	0	0	0	0	0	0	0	0	0	0	0.591998	0	0	0	0	0
D018365	0	0	0	0	0	0.277762	0	0	0	0.206015	0	0	0	0	0	0	0	0	0	0	0	0	0	0	0.116065	0	0	0	0	0	0	0	0	0	0	0	0	0	0	0	0	0	0	0	0	0	0	0	0
D002313	0	0	0	0	0	0	0.220026	0	0	0	0	0	0	0	0	0	0	0	0	0	0	0	0	0.133273	0.150049	0	0	0	0	0	0	0	0	0	0	0	0	0	0	0	0	0	0	0	0	0	0	0	0
D038062	0	0	0	0	0	0	0.420839	0	0	0	0	0	0	0	0	0	0	0	0	0	0	0	0	0	0	0	0	0	0	0	0	0	0	0	0.112837	0	0	0	0	0	0	0	0	0.265202	0	0	0	0	0
D057765	0	0	0	0	0	0	0.170817	0	0	0	0	0	0	0	0	0	0	0	0	0	0	0	0	0.375891	0	0	0	0	0	0	0	0	0	0	0	0	0	0	0	0	0	0	0	0	0	0	0	0	0
D023903	0	0	0	0	0	0	0.115054	0	0	0	0	0	0	0	0	0	0	0	0	0	0	0	0	0	0	0	0	0	0	0	0	0.840244	0	0	0	0	0	0	0	0	0	0	0	0	0	0	0	0	0
D003914	0	0	0	0	0	0	0.330313	0	0	0	0	0	0	0	0.174643	0	0	0	0	0	0	0	0	0.103872	0	0	0	0	0	0	0	0	0	0	0	0	0	0	0	0	0	0	0	0.623823	0	0	0	0	0
D010580	0	0	0	0	0	0	0	0.283907	0	0	0	0	0	0	0	0	0	0	0	0	0	0	0	0	0.206778	0	0	0	0	0.296238	0	0	0	0	0	0	0	0	0	0	0	0	0	0	0	0	0	0	0
D019896	0	0	0	0	0	0	0	0.228951	0	0	0	0	0	0	0	0	0	0.141201	0	0	0	0	0	0.140398	0.133636	0	0	0.390301	0	0	0	0	0	0	0	0	0	0	0	0	0	0	0	0	0	0	0	0	0
D052456	0	0	0	0	0	0	0	0.101077	0	0	0	0	0	0	0.128702	0	0	0	0	0	0	0	0	0.254362	0	0.342151	0	0	0	0	0	0	0	0	0	0	0	0	0	0	0	0	0	0	0	0	0	0	0
D017512	0	0	0	0	0	0	0	0	0.180843	0	0	0	0	0	0	0	0	0	0	0	0	0	0	0	0	0	0	0	0	0	0	0	0	0	0	0	0	0	0	0	0	0	0	0	0	0	0	0	0
D002636	0	0	0	0	0	0	0	0	0	0.101281	0	0	0	0	0	0	0	0	0	0	0	0	0	0	0	0	0	0	0	0	0	0	0	0	0	0	0	0	0	0	0	0	0	0	0	0	0	0	0
D015799	0	0	0	0	0	0	0	0	0	0.285663	0	0	0.344333	0	0	0	0	0	0	0	0	0	0	0	0	0	0	0	0	0	0	0	0	0.344702	0	0	0	0	0	0	0	0	0	0	0	0	0	0	0
D006015	0	0	0	0	0	0	0	0	0	0.143916	0	0	0	0	0	0	0	0	0	0	0	0	0	0	0	0	0	0	0	0	0	0	0	0	0	0	0	0	0	0	0	0	0	0	0	0	0	0	0
D054119	0	0	0	0	0	0	0	0	0	0.141032	0.349197	0	0	0	0	0	0	0	0	0	0	0	0	0	0	0	0	0	0	0	0	0	0	0	0	0	0	0	0	0	0	0	0	0	0	0	0	0	0
D015794	0	0	0	0	0	0	0	0	0	0.425021	0	0	0	0	0	0	0	0	0	0	0	0	0	0	0	0	0	0	0	0	0	0	0	0.615344	0	0	0	0	0	0	0	0	0	0	0	0	0	0	0
D015593	0	0	0	0	0	0	0	0	0	0	0.357191	0	0	0	0	0	0	0	0	0	0	0	0	0	0	0	0	0	0	0	0	0	0	0.840675	0	0	0	0	0	0	0	0	0	0	0	0	0	0	0
D012003	0	0	0	0	0	0	0	0	0	0	0	0.129719	0	0	0	0	0	0	0	0	0	0	0	0	0.130433	0	0	0	0	0	0	0	0	0	0	0	0	0	0	0	0	0	0	0.195307	0	0	0	0	0
D000550	0	0	0	0	0	0	0	0	0	0	0	0	0.904725	0	0	0	0	0	0	0	0	0	0	0	0	0	0	0	0	0	0	0	0	0	0	0	0	0	0	0	0	0	0	0	0	0	0	0	0
D015858	0	0	0	0	0	0	0	0	0	0	0	0	0.916668	0	0	0	0	0	0	0	0	0	0	0	0	0	0	0	0	0	0	0	0	0	0	0	0	0	0	0	0	0	0	0	0	0	0	0	0
D020192	0	0	0	0	0	0	0	0	0	0	0	0	0	0.282151	0	0	0	0	0	0	0.311124	0	0	0	0	0	0	0	0	0	0	0	0	0	0	0	0	0	0	0	0	0	0	0	0	0	0	0	0
D057130	0	0	0	0	0	0	0	0	0	0	0	0	0	0	0.120102	0	0	0	0	0	0	0	0	0	0	0	0	0	0	0	0	0	0	0.403888	0	0	0	0	0	0	0	0	0	0	0	0	0	0	0
D058496	0	0	0	0	0	0	0	0	0	0	0	0	0	0	0.245977	0	0	0	0	0	0	0	0	0	0	0	0	0	0	0	0	0	0	0	0	0	0	0	0	0	0	0	0	0.192459	0	0	0	0	0
D052120	0	0	0	0	0	0	0	0	0	0	0	0	0	0	0.102852	0.111229	0	0	0	0	0	0	0	0	0	0	0	0	0	0	0	0	0	0	0	0.288067	0	0	0	0	0	0	0	0	0	0	0	0	0
D029461	0	0	0	0	0	0	0	0	0	0	0	0	0	0	0.129429	0	0	0	0	0	0	0	0	0	0	0	0	0	0	0	0	0	0	0	0	0	0	0	0	0	0	0	0	0	0	0	0	0	0
D018902	0	0	0	0	0	0	0	0	0	0	0	0	0	0	0.206071	0	0	0	0	0	0	0	0	0	0	0	0	0	0	0	0	0	0	0	0	0	0	0	0	0	0	0	0	0	0	0	0	0	0
D014256	0	0	0	0	0	0	0	0	0	0	0	0	0	0	0.182378	0	0	0	0	0	0	0.342073	0	0	0	0	0	0	0	0	0	0	0	0	0	0	0	0	0	0	0	0	0	0	0	0	0	0	0
D029593	0	0	0	0	0	0	0	0	0	0	0	0	0	0	0.108433	0	0	0	0	0	0	0	0	0	0	0	0	0	0	0	0	0	0	0	0	0	0	0	0	0	0	0	0	0	0	0	0	0	0
D054880	0	0	0	0	0	0	0	0	0	0	0	0	0	0	0.203942	0	0	0	0	0	0	0	0	0	0	0	0	0	0	0	0	0	0	0	0	0	0	0	0	0	0	0	0	0	0	0	0	0	0
D020178	0	0	0	0	0	0	0	0	0	0	0	0	0	0	0.599466	0	0	0	0	0	0	0	0	0	0	0	0	0	0	0	0	0	0	0	0	0	0	0	0	0	0	0	0	0	0	0	0	0	0
D013661	0	0	0	0	0	0	0	0	0	0	0	0	0	0	0	0.289889	0	0	0	0	0	0	0	0	0.104551	0	0	0	0	0	0	0	0	0	0	0.275619	0	0	0	0	0	0	0	0	0	0	0	0	0
D054069	0	0	0	0	0	0	0	0	0	0	0	0	0	0	0	0.140613	0	0	0	0	0	0	0	0	0	0	0	0	0	0	0	0	0	0	0	0.253791	0	0	0	0	0	0	0	0	0	0	0	0	0
D020371	0	0	0	0	0	0	0	0	0	0	0	0	0	0	0	0	0	0.219499	0	0	0	0	0	0	0	0	0	0	0	0	0	0	0	0	0	0	0	0	0	0	0	0	0	0	0	0	0	0	0
D006053	0	0	0	0	0	0	0	0	0	0	0	0	0	0	0	0	0	0	0	0.319119	0	0	0	0	0	0	0	0	0	0	0	0	0	0	0	0	0	0	0	0	0	0	0	0	0	0	0	0	0
D019280	0	0	0	0	0	0	0	0	0	0	0	0	0	0	0	0	0	0	0	0	0	0.44627	0	0	0	0	0	0	0	0	0	0	0	0	0	0	0	0	0	0	0	0	0	0	0	0	0	0	0
D016117	0	0	0	0	0	0	0	0	0	0	0	0	0	0	0	0	0	0	0	0	0	0.292856	0	0	0	0	0	0	0	0	0	0	0	0.508427	0	0	0	0	0	0	0	0	0	0	0	0	0	0	0
D016113	0	0	0	0	0	0	0	0	0	0	0	0	0	0	0	0	0	0	0	0	0	0.604748	0	0	0	0	0	0	0	0	0	0	0	0	0	0	0	0	0	0	0	0	0	0	0	0	0	0	0
D007767	0	0	0	0	0	0	0	0	0	0	0	0	0	0	0	0	0	0	0	0	0	0.192414	0	0	0	0	0	0	0	0	0	0	0	0	0	0	0	0	0	0	0	0	0	0	0	0	0	0	0
D052537	0	0	0	0	0	0	0	0	0	0	0	0	0	0	0	0	0	0	0	0	0	0	0	0.144056	0	0	0	0	0	0	0	0	0	0	0	0	0	0	0	0	0	0	0	0	0	0	0	0	0
D001606	0	0	0	0	0	0	0	0	0	0	0	0	0	0	0	0	0	0	0	0	0	0	0	0.122176	0	0	0	0	0	0	0	0	0	0	0	0	0.76938	0	0	0	0	0	0	0	0	0	0	0	0
D008594	0	0	0	0	0	0	0	0	0	0	0	0	0	0	0	0	0	0	0	0	0	0	0	0.104019	0	0	0	0	0	0	0	0	0	0	0	0	0	0	0	0	0	0	0	0	0	0	0	0	0
D056128	0	0	0	0	0	0	0	0	0	0	0	0	0	0	0	0	0	0	0	0	0	0	0	0.254581	0	0	0	0	0	0	0	0	0	0	0	0	0	0	0	0	0	0	0	0	0	0	0	0	0
D011628	0	0	0	0	0	0	0	0	0	0	0	0	0	0	0	0	0	0	0	0	0	0	0	0.188381	0	0	0	0	0	0	0	0	0	0	0	0	0	0	0	0	0	0	0	0	0	0	0	0	0
D056684	0	0	0	0	0	0	0	0	0	0	0	0	0	0	0	0	0	0	0	0	0	0	0	0.143511	0	0	0	0	0	0	0	0	0	0	0	0	0	0	0	0	0	0	0	0	0	0	0	0	0
D054179	0	0	0	0	0	0	0	0	0	0	0	0	0	0	0	0	0	0	0	0	0	0	0	0.162065	0.244047	0	0	0	0	0	0	0	0	0	0	0	0	0	0	0	0	0	0	0	0	0	0	0	0
D010610	0	0	0	0	0	0	0	0	0	0	0	0	0	0	0	0	0	0	0	0	0	0	0	0.248854	0	0	0	0	0	0	0	0	0	0	0	0	0	0	0	0	0	0	0	0	0	0	0	0	0
D046768	0	0	0	0	0	0	0	0	0	0	0	0	0	0	0	0	0	0	0	0	0	0	0	0.179159	0	0	0	0	0	0	0	0	0	0	0	0	0	0	0	0	0	0	0	0	0	0	0	0	0
D003414	0	0	0	0	0	0	0	0	0	0	0	0	0	0	0	0	0	0	0	0	0	0	0	0	0.11975	0	0	0	0	0	0	0	0	0	0	0	0	0	0	0	0	0	0	0	0	0	0	0	0
D007972	0	0	0	0	0	0	0	0	0	0	0	0	0	0	0	0	0	0	0	0	0	0	0	0	0.126181	0	0	0	0	0	0	0	0	0	0	0	0	0	0	0	0	0	0	0	0	0	0	0	0
D030321	0	0	0	0	0	0	0	0	0	0	0	0	0	0	0	0	0	0	0	0	0	0	0	0	0.127881	0	0	0	0	0	0	0	0	0	0	0	0	0	0	0	0	0	0	0	0	0	0	0	0
D007863	0	0	0	0	0	0	0	0	0	0	0	0	0	0	0	0	0	0	0	0	0	0	0	0	0.129039	0	0	0	0	0	0	0	0	0	0	0	0	0	0	0.374944	0	0	0	0	0	0	0	0	0
D010520	0	0	0	0	0	0	0	0	0	0	0	0	0	0	0	0	0	0	0	0	0	0	0	0	0.197687	0	0	0	0	0	0	0	0	0	0	0	0	0	0	0	0	0	0	0	0	0	0	0	0
D046351	0	0	0	0	0	0	0	0	0	0	0	0	0	0	0	0	0	0	0	0	0	0	0	0	0.220545	0	0	0	0	0	0	0	0	0	0	0	0	0	0	0	0	0	0	0	0	0	0	0	0
D020165	0	0	0	0	0	0	0	0	0	0	0	0	0	0	0	0	0	0	0	0	0	0	0	0	0.100043	0	0	0	0	0	0	0	0	0	0	0	0	0	0	0	0	0	0	0	0	0	0	0	0
D009261	0	0	0	0	0	0	0	0	0	0	0	0	0	0	0	0	0	0	0	0	0	0	0	0	0.142426	0	0	0	0	0	0	0	0	0	0	0	0	0	0	0	0	0	0	0	0	0	0	0	0
D019767	0	0	0	0	0	0	0	0	0	0	0	0	0	0	0	0	0	0	0	0	0	0	0	0	0.103321	0	0	0	0	0	0	0	0	0	0.361316	0	0	0	0	0	0	0	0	0	0	0	0	0	0
D005171	0	0	0	0	0	0	0	0	0	0	0	0	0	0	0	0	0	0	0	0	0	0	0	0	0.236302	0	0	0	0	0	0	0	0	0	0	0	0	0	0	0	0	0	0	0	0	0	0	0	0
D052496	0	0	0	0	0	0	0	0	0	0	0	0	0	0	0	0	0	0	0	0	0	0	0	0	0	0.713933	0	0	0	0.112284	0	0	0	0	0	0	0	0	0	0	0	0	0	0	0	0	0	0	0
D020182	0	0	0	0	0	0	0	0	0	0	0	0	0	0	0	0	0	0	0	0	0	0	0	0	0	0	0	0.213177	0	0	0	0	0	0	0	0	0	0	0	0	0	0	0	0	0	0	0	0	0
D058490	0	0	0	0	0	0	0	0	0	0	0	0	0	0	0	0	0	0	0	0	0	0	0	0	0	0	0	0	0	0.862454	0	0	0	0	0	0	0	0	0	0	0	0	0	0	0	0	0	0	0
D058489	0	0	0	0	0	0	0	0	0	0	0	0	0	0	0	0	0	0	0	0	0	0	0	0	0	0	0	0	0	0.862454	0	0	0	0	0	0	0	0	0	0	0	0	0	0	0	0	0	0	0
D054882	0	0	0	0	0	0	0	0	0	0	0	0	0	0	0	0	0	0	0	0	0	0	0	0	0	0	0	0	0	0.862454	0	0	0	0	0	0	0	0	0	0	0	0	0	0	0	0	0	0	0
D023961	0	0	0	0	0	0	0	0	0	0	0	0	0	0	0	0	0	0	0	0	0	0	0	0	0	0	0	0	0	0.823281	0	0	0	0	0	0	0	0	0	0	0	0	0	0	0	0	0	0	0
D006177	0	0	0	0	0	0	0	0	0	0	0	0	0	0	0	0	0	0	0	0	0	0	0	0	0	0	0	0	0	0.513891	0	0	0	0	0	0	0	0	0	0	0	0	0	0	0	0	0	0	0
D056735	0	0	0	0	0	0	0	0	0	0	0	0	0	0	0	0	0	0	0	0	0	0	0	0	0	0	0	0	0	0	0.624239	0	0	0	0	0	0.795771	0	0	0	0	0	0	0	0	0	0	0	0
D006014	0	0	0	0	0	0	0	0	0	0	0	0	0	0	0	0	0	0	0	0	0	0	0	0	0	0	0	0	0	0	0	0.257488	0	0	0	0.245619	0	0	0	0	0	0	0	0	0	0	0	0	0
D058499	0	0	0	0	0	0	0	0	0	0	0	0	0	0	0	0	0	0	0	0	0	0	0	0	0	0	0	0	0	0	0	0	0	0.695109	0	0	0	0	0	0	0	0	0	0	0	0	0	0	0
D017889	0	0	0	0	0	0	0	0	0	0	0	0	0	0	0	0	0	0	0	0	0	0	0	0	0	0	0	0	0	0	0	0	0	0.189072	0	0	0	0	0	0	0	0	0	0	0	0	0	0	0
D057826	0	0	0	0	0	0	0	0	0	0	0	0	0	0	0	0	0	0	0	0	0	0	0	0	0	0	0	0	0	0	0	0	0	0.21871	0	0	0	0	0	0	0	0	0	0	0	0	0	0	0
D007905	0	0	0	0	0	0	0	0	0	0	0	0	0	0	0	0	0	0	0	0	0	0	0	0	0	0	0	0	0	0	0	0	0	0.240449	0	0	0	0	0	0	0	0	0	0	0	0	0	0	0
D056730	0	0	0	0	0	0	0	0	0	0	0	0	0	0	0	0	0	0	0	0	0	0	0	0	0	0	0	0	0	0	0	0	0	0	0.56178	0	0	0	0	0	0	0	0	0.184048	0	0	0	0	0
D019873	0	0	0	0	0	0	0	0	0	0	0	0	0	0	0	0	0	0	0	0	0	0	0	0	0	0	0	0	0	0	0	0	0	0	0	0.101573	0	0	0	0	0	0	0	0	0	0	0	0	0
D053307	0	0	0	0	0	0	0	0	0	0	0	0	0	0	0	0	0	0	0	0	0	0	0	0	0	0	0	0	0	0	0	0	0	0	0	0.106154	0.53207	0	0	0	0	0	0	0	0	0	0	0	0
D004688	0	0	0	0	0	0	0	0	0	0	0	0	0	0	0	0	0	0	0	0	0	0	0	0	0	0	0	0	0	0	0	0	0	0	0	0	0	0	0.174328	0	0	0	0	0	0	0	0	0	0
D006981	0	0	0	0	0	0	0	0	0	0	0	0	0	0	0	0	0	0	0	0	0	0	0	0	0	0	0	0	0	0	0	0	0	0	0	0	0	0	0	0	0	0	0	0	0	0	0	0.169012	0
D005642	0	0	0	0	0	0	0	0	0	0	0	0	0	0	0	0	0	0	0	0	0	0	0	0	0	0	0	0	0	0	0	0	0	0	0	0	0	0	0	0	0	0	0	0	0	0	0	0	0
D004479	0	0	0	0	0	0	0	0	0	0	0	0	0	0	0	0	0	0	0	0	0	0	0	0	0	0	0	0	0	0	0	0	0	0	0	0	0	0	0	0	0	0	0	0	0	0	0	0	0
D003873	0	0	0	0	0	0	0	0	0	0	0	0	0	0	0	0	0	0	0	0	0	0	0	0	0	0	0	0	0	0	0	0	0	0	0	0	0	0	0	0	0	0	0	0	0	0	0	0	0
D015435	0	0	0	0	0	0	0	0	0	0	0	0	0	0	0	0	0	0	0	0	0	0	0	0	0	0	0	0	0	0	0	0	0	0	0	0	0	0	0	0	0	0	0	0	0	0	0	0	0
D017499	0	0	0	0	0	0	0	0	0	0	0	0	0	0	0	0	0	0	0	0	0	0	0	0	0	0	0	0	0	0	0	0	0	0	0	0	0	0	0	0	0	0	0	0	0	0	0	0	0
D056266	0	0	0	0	0	0	0	0	0	0	0	0	0	0	0	0	0	0	0	0	0	0	0	0	0	0	0	0	0	0	0	0	0	0	0	0	0	0	0	0	0	0	0	0	0	0	0	0	0
D015826	0	0	0	0	0	0	0	0	0	0	0	0	0	0	0	0	0	0	0	0	0	0	0	0	0	0	0	0	0	0	0	0	0	0	0	0	0	0	0	0	0	0	0	0	0	0	0	0	0
D022861	0	0	0	0	0	0	0	0	0	0	0	0	0	0	0	0	0	0	0	0	0	0	0	0	0	0	0	0	0	0	0	0	0	0	0	0	0	0	0	0	0	0	0	0	0	0	0	0	0
D015619	0	0	0	0	0	0	0	0	0	0	0	0	0	0	0	0	0	0	0	0	0	0	0	0	0	0	0	0	0	0	0	0	0	0	0	0	0	0	0	0	0	0	0	0	0	0	0	0	0
D053632	0	0	0	0	0	0	0	0	0	0	0	0	0	0	0	0	0	0	0	0	0	0	0	0	0	0	0	0	0	0	0	0	0	0	0	0	0	0	0	0	0	0	0	0	0	0	0	0	0
D016137	0	0	0	0	0	0	0	0	0	0	0	0	0	0	0	0	0	0	0	0	0	0	0	0	0	0	0	0	0	0	0	0	0	0	0	0	0	0	0	0	0	0	0	0	0	0	0	0	0
D002817	0	0	0	0	0	0	0	0	0	0	0	0	0	0	0	0	0	0	0	0	0	0	0	0	0	0	0	0	0	0	0	0	0	0	0	0	0	0	0	0	0	0	0	0	0	0	0	0	0
D057973	0	0	0	0	0	0	0	0	0	0	0	0	0	0	0	0	0	0	0	0	0	0	0	0	0	0	0	0	0	0	0	0	0	0	0	0	0	0	0	0	0	0	0	0	0	0	0	0	0
D007569	0	0	0	0	0	0	0	0	0	0	0	0	0	0	0	0	0	0	0	0	0	0	0	0	0	0	0	0	0	0	0	0	0	0	0	0	0	0	0	0	0	0	0	0	0	0	0	0	0
D054975	0	0	0	0	0	0	0	0	0	0	0	0	0	0	0	0	0	0	0	0	0	0	0	0	0	0	0	0	0	0	0	0	0	0	0	0	0	0	0	0	0	0	0	0	0	0	0	0	0
D018827	0	0	0	0	0	0	0	0	0	0	0	0	0	0	0	0	0	0	0	0	0	0	0	0	0	0	0	0	0	0	0	0	0	0	0	0	0	0	0	0	0	0	0	0	0	0	0	0	0
D020347	0	0	0	0	0	0	0	0	0	0	0	0	0	0	0	0	0	0	0	0	0	0	0	0	0	0	0	0	0	0	0	0	0	0	0	0	0	0	0	0	0	0	0	0	0	0	0	0	0
D056830	0	0	0	0	0	0	0	0	0	0	0	0	0	0	0	0	0	0	0	0	0	0	0	0	0	0	0	0	0	0	0	0	0	0	0	0	0	0	0	0	0	0	0	0	0	0	0	0	0
D001002	0	0	0	0	0	0	0	0	0	0	0	0	0	0	0	0	0	0	0	0	0	0	0	0	0	0	0	0	0	0	0	0	0	0	0	0	0	0	0	0	0	0	0	0	0	0	0	0	0
D017119	0	0	0	0	0	0	0	0	0	0	0	0	0	0	0	0	0	0	0	0	0	0	0	0	0	0	0	0	0	0	0	0	0	0	0	0	0	0	0	0	0	0	0	0	0	0	0	0	0
D025962	0	0	0	0	0	0	0	0	0	0	0	0	0	0	0	0	0	0	0	0	0	0	0	0	0	0	0	0	0	0	0	0	0	0	0	0	0	0	0	0	0	0	0	0	0	0	0	0	0
D058540	0	0	0	0	0	0	0	0	0	0	0	0	0	0	0	0	0	0	0	0	0	0	0	0	0	0	0	0	0	0	0	0	0	0	0	0	0	0	0	0	0	0	0	0	0	0	0	0	0
D007566	0	0	0	0	0	0	0	0	0	0	0	0	0	0	0	0	0	0	0	0	0	0	0	0	0	0	0	0	0	0	0	0	0	0	0	0	0	0	0	0	0	0	0	0	0	0	0	0	0
D006871	0	0	0	0	0	0	0	0	0	0	0	0	0	0	0	0	0	0	0	0	0	0	0	0	0	0	0	0	0	0	0	0	0	0	0	0	0	0	0	0	0	0	0	0	0	0	0	0	0
D000474	0	0	0	0	0	0	0	0	0	0	0	0	0	0	0	0	0	0	0	0	0	0	0	0	0	0	0	0	0	0	0	0	0	0	0	0	0	0	0	0	0	0	0	0	0	0	0	0	0
D009914	0	0	0	0	0	0	0	0	0	0	0	0	0	0	0	0	0	0	0	0	0	0	0	0	0	0	0	0	0	0	0	0	0	0	0	0	0	0	0	0	0	0	0	0	0	0	0	0	0
D050030	0	0	0	0	0	0	0	0	0	0	0	0	0	0	0	0	0	0	0	0	0	0	0	0	0	0	0	0	0	0	0	0	0	0	0	0	0	0	0	0	0	0	0	0	0	0	0	0	0
D010023	0	0	0	0	0	0	0	0	0	0	0	0	0	0	0	0	0	0	0	0	0	0	0	0	0	0	0	0	0	0	0	0	0	0	0	0	0	0	0	0	0	0	0	0	0	0	0	0	0
D015318	0	0	0	0	0	0	0	0	0	0	0	0	0	0	0	0	0	0	0	0	0	0	0	0	0	0	0	0	0	0	0	0	0	0	0	0	0	0	0	0	0	0	0	0	0	0	0	0	0
D002178	0	0	0	0	0	0	0	0	0	0	0	0	0	0	0	0	0	0	0	0	0	0	0	0	0	0	0	0	0	0	0	0	0	0	0	0	0	0	0	0	0	0	0	0	0	0	0	0	0
D000567	0	0	0	0	0	0	0	0	0	0	0	0	0	0	0	0	0	0	0	0	0	0	0	0	0	0	0	0	0	0	0	0	0	0	0	0	0	0	0	0	0	0	0	0	0	0	0	0	0
D050174	0	0	0	0	0	0	0	0	0	0	0	0	0	0	0	0	0	0	0	0	0	0	0	0	0	0	0	0	0	0	0	0	0	0	0	0	0	0	0	0	0	0	0	0	0	0	0	0	0
D008363	0	0	0	0	0	0	0	0	0	0	0	0	0	0	0	0	0	0	0	0	0	0	0	0	0	0	0	0	0	0	0	0	0	0	0	0	0	0	0	0	0	0	0	0	0	0	0	0	0
D003731	0	0	0	0	0	0	0	0	0	0	0	0	0	0	0	0	0	0	0	0	0	0	0	0	0	0	0	0	0	0	0	0	0	0	0	0	0	0	0	0	0	0	0	0	0	0	0	0	0
D000033	0	0	0	0	0	0	0	0	0	0	0	0	0	0	0	0	0	0	0	0	0	0	0	0	0	0	0	0	0	0	0	0	0	0	0	0	0	0	0	0	0	0	0	0	0	0	0	0	0
D057770	0	0	0	0	0	0	0	0	0	0	0	0	0	0	0	0	0	0	0	0	0	0	0	0	0	0	0	0	0	0	0	0	0	0	0	0	0	0	0	0	0	0	0	0	0	0	0	0	0
D005177	0	0	0	0	0	0	0	0	0	0	0	0	0	0	0	0	0	0	0	0	0	0	0	0	0	0	0	0	0	0	0	0	0	0	0	0	0	0	0	0	0	0	0	0	0	0	0	0	0
D056828	0	0	0	0	0	0	0	0	0	0	0	0	0	0	0	0	0	0	0	0	0	0	0	0	0	0	0	0	0	0	0	0	0	0	0	0	0	0	0	0	0	0	0	0	0	0	0	0	0
D001982	0	0	0	0	0	0	0	0	0	0	0	0	0	0	0	0	0	0	0	0	0	0	0	0	0	0	0	0	0	0	0	0	0	0	0	0	0	0	0	0	0	0	0	0	0	0	0	0	0
D001250	0	0	0	0	0	0	0	0	0	0	0	0	0	0	0	0	0	0	0	0	0	0	0	0	0	0	0	0	0	0	0	0	0	0	0	0	0	0	0	0	0	0	0	0	0	0	0	0	0
D049932	0	0	0	0	0	0	0	0	0	0	0	0	0	0	0	0	0	0	0	0	0	0	0	0	0	0	0	0	0	0	0	0	0	0	0	0	0	0	0	0	0	0	0	0	0	0	0	0	0
D002128	0	0	0	0	0	0	0	0	0	0	0	0	0	0	0	0	0	0	0	0	0	0	0	0	0	0	0	0	0	0	0	0	0	0	0	0	0	0	0	0	0	0	0	0	0	0	0	0	0
D054312	0	0	0	0	0	0	0	0	0	0	0	0	0	0	0	0	0	0	0	0	0	0	0	0	0	0	0	0	0	0	0	0	0	0	0	0	0	0	0	0	0	0	0	0	0	0	0	0	0
D012005	0	0	0	0	0	0	0	0	0	0	0	0	0	0	0	0	0	0	0	0	0	0	0	0	0	0	0	0	0	0	0	0	0	0	0	0	0	0	0	0	0	0	0	0	0	0	0	0	0
D052497	0	0	0	0	0	0	0	0	0	0	0	0	0	0	0	0	0	0	0	0	0	0	0	0	0	0	0	0	0	0	0	0	0	0	0	0	0	0	0	0	0	0	0	0	0	0	0	0	0
D053359	0	0	0	0	0	0	0	0	0	0	0	0	0	0	0	0	0	0	0	0	0	0	0	0	0	0	0	0	0	0	0	0	0	0	0	0	0	0	0	0	0	0	0	0	0	0	0	0	0
D018234	0	0	0	0	0	0	0	0	0	0	0	0	0	0	0	0	0	0	0	0	0	0	0	0	0	0	0	0	0	0	0	0	0	0	0	0	0	0	0	0	0	0	0	0	0	0	0	0	0
D016114	0	0	0	0	0	0	0	0	0	0	0	0	0	0	0	0	0	0	0	0	0	0	0	0	0	0	0	0	0	0	0	0	0	0	0	0	0	0	0	0	0	0	0	0	0	0	0	0	0
D012798	0	0	0	0	0	0	0	0	0	0	0	0	0	0	0	0	0	0	0	0	0	0	0	0	0	0	0	0	0	0	0	0	0	0	0	0	0	0	0	0	0	0	0	0	0	0	0	0	0
D008059	0	0	0	0	0	0	0	0	0	0	0	0	0	0	0	0	0	0	0	0	0	0	0	0	0	0	0	0	0	0	0	0	0	0	0	0	0	0	0	0	0	0	0	0	0	0	0	0	0
D008557	0	0	0	0	0	0	0	0	0	0	0	0	0	0	0	0	0	0	0	0	0	0	0	0	0	0	0	0	0	0	0	0	0	0	0	0	0	0	0	0	0	0	0	0	0	0	0	0	0
D001656	0	0	0	0	0	0	0	0	0	0	0	0	0	0	0	0	0	0	0	0	0	0	0	0	0	0	0	0	0	0	0	0	0	0	0	0	0	0	0	0	0	0	0	0	0	0	0	0	0
D025981	0	0	0	0	0	0	0	0	0	0	0	0	0	0	0	0	0	0	0	0	0	0	0	0	0	0	0	0	0	0	0	0	0	0	0	0	0	0	0	0	0	0	0	0	0	0	0	0	0
D016638	0	0	0	0	0	0	0	0	0	0	0	0	0	0	0	0	0	0	0	0	0	0	0	0	0	0	0	0	0	0	0	0	0	0	0	0	0	0	0	0	0	0	0	0	0	0	0	0	0
D006832	0	0	0	0	0	0	0	0	0	0	0	0	0	0	0	0	0	0	0	0	0	0	0	0	0	0	0	0	0	0	0	0	0	0	0	0	0	0	0	0	0	0	0	0	0	0	0	0	0
D056768	0	0	0	0	0	0	0	0	0	0	0	0	0	0	0	0	0	0	0	0	0	0	0	0	0	0	0	0	0	0	0	0	0	0	0	0	0	0	0	0	0	0	0	0	0	0	0	0	0
D020147	0	0	0	0	0	0	0	0	0	0	0	0	0	0	0	0	0	0	0	0	0	0	0	0	0	0	0	0	0	0	0	0	0	0	0	0	0	0	0	0	0	0	0	0	0	0	0	0	0
D054868	0	0	0	0	0	0	0	0	0	0	0	0	0	0	0	0	0	0	0	0	0	0	0	0	0	0	0	0	0	0	0	0	0	0	0	0	0	0	0	0	0	0	0	0	0	0	0	0	0
D016464	0	0	0	0	0	0	0	0	0	0	0	0	0	0	0	0	0	0	0	0	0	0	0	0	0	0	0	0	0	0	0	0	0	0	0	0	0	0	0	0	0	0	0	0	0	0	0	0	0
D019693	0	0	0	0	0	0	0	0	0	0	0	0	0	0	0	0	0	0	0	0	0	0	0	0	0	0	0	0	0	0	0	0	0	0	0	0	0	0	0	0	0	0	0	0	0	0	0	0	0
D053306	0	0	0	0	0	0	0	0	0	0	0	0	0	0	0	0	0	0	0	0	0	0	0	0	0	0	0	0	0	0	0	0	0	0	0	0	0	0	0	0	0	0	0	0	0	0	0	0	0
D024343	0	0	0	0	0	0	0	0	0	0	0	0	0	0	0	0	0	0	0	0	0	0	0	0	0	0	0	0	0	0	0	0	0	0	0	0	0	0	0	0	0	0	0	0	0	0	0	0	0
D020513	0	0	0	0	0	0	0	0	0	0	0	0	0	0	0	0	0	0	0	0	0	0	0	0	0	0	0	0	0	0	0	0	0	0	0	0	0	0	0	0	0	0	0	0	0	0	0	0	0
D019214	0	0	0	0	0	0	0	0	0	0	0	0	0	0	0	0	0	0	0	0	0	0	0	0	0	0	0	0	0	0	0	0	0	0	0	0	0	0	0	0	0	0	0	0	0	0	0	0	0
D020941	0	0	0	0	0	0	0	0	0	0	0	0	0	0	0	0	0	0	0	0	0	0	0	0	0	0	0	0	0	0	0	0	0	0	0	0	0	0	0	0	0	0	0	0	0	0	0	0	0
D006617	0	0	0	0	0	0	0	0	0	0	0	0	0	0	0	0	0	0	0	0	0	0	0	0	0	0	0	0	0	0	0	0	0	0	0	0	0	0	0	0	0	0	0	0	0	0	0	0	0
D017490	0	0	0	0	0	0	0	0	0	0	0	0	0	0	0	0	0	0	0	0	0	0	0	0	0	0	0	0	0	0	0	0	0	0	0	0	0	0	0	0	0	0	0	0	0	0	0	0	0
D020195	0	0	0	0	0	0	0	0	0	0	0	0	0	0	0	0	0	0	0	0	0	0	0	0	0	0	0	0	0	0	0	0	0	0	0	0	0	0	0	0	0	0	0	0	0	0	0	0	0
D020163	0	0	0	0	0	0	0	0	0	0	0	0	0	0	0	0	0	0	0	0	0	0	0	0	0	0	0	0	0	0	0	0	0	0	0	0	0	0	0	0	0	0	0	0	0	0	0	0	0
D006250	0	0	0	0	0	0	0	0	0	0	0	0	0	0	0	0	0	0	0	0	0	0	0	0	0	0	0	0	0	0	0	0	0	0	0	0	0	0	0	0	0	0	0	0	0	0	0	0	0
D044903	0	0	0	0	0	0	0	0	0	0	0	0	0	0	0	0	0	0	0	0	0	0	0	0	0	0	0	0	0	0	0	0	0	0	0	0	0	0	0	0	0	0	0	0	0	0	0	0	0
D019150	0	0	0	0	0	0	0	0	0	0	0	0	0	0	0	0	0	0	0	0	0	0	0	0	0	0	0	0	0	0	0	0	0	0	0	0	0	0	0	0	0	0	0	0	0	0	0	0	0
D029241	0	0	0	0	0	0	0	0	0	0	0	0	0	0	0	0	0	0	0	0	0	0	0	0	0	0	0	0	0	0	0	0	0	0	0	0	0	0	0	0	0	0	0	0	0	0	0	0	0
D012779	0	0	0	0	0	0	0	0	0	0	0	0	0	0	0	0	0	0	0	0	0	0	0	0	0	0	0	0	0	0	0	0	0	0	0	0	0	0	0	0	0	0	0	0	0	0	0	0	0
D011696	0	0	0	0	0	0	0	0	0	0	0	0	0	0	0	0	0	0	0	0	0	0	0	0	0	0	0	0	0	0	0	0	0	0	0	0	0	0	0	0	0	0	0	0	0	0	0	0	0
D004310	0	0	0	0	0	0	0	0	0	0	0	0	0	0	0	0	0	0	0	0	0	0	0	0	0	0	0	0	0	0	0	0	0	0	0	0	0	0	0	0	0	0	0	0	0	0	0	0	0
D002828	0	0	0	0	0	0	0	0	0	0	0	0	0	0	0	0	0	0	0	0	0	0	0	0	0	0	0	0	0	0	0	0	0	0	0	0	0	0	0	0	0	0	0	0	0	0	0	0	0
D006983	0	0	0	0	0	0	0	0	0	0	0	0	0	0	0	0	0	0	0	0	0	0	0	0	0	0	0	0	0	0	0	0	0	0	0	0	0	0	0	0	0	0	0	0	0	0	0	0	0
D007499	0	0	0	0	0	0	0	0	0	0	0	0	0	0	0	0	0	0	0	0	0	0	0	0	0	0	0	0	0	0	0	0	0	0	0	0	0	0	0	0	0	0	0	0	0	0	0	0	0
D018754	0	0	0	0	0	0	0	0	0	0	0	0	0	0	0	0	0	0	0	0	0	0	0	0	0	0	0	0	0	0	0	0	0	0	0	0	0	0	0	0	0	0	0	0	0	0	0	0	0
D049914	0	0	0	0	0	0	0	0	0	0	0	0	0	0	0	0	0	0	0	0	0	0	0	0	0	0	0	0	0	0	0	0	0	0	0	0	0	0	0	0	0	0	0	0	0	0	0	0	0
D000007	0	0	0	0	0	0	0	0	0	0	0	0	0	0	0	0	0	0	0	0	0	0	0	0	0	0	0	0	0	0	0	0	0	0	0	0	0	0	0	0	0	0	0	0	0	0	0	0	0
D004916	0	0	0	0	0	0	0	0	0	0	0	0	0	0	0	0	0	0	0	0	0	0	0	0	0	0	0	0	0	0	0	0	0	0	0	0	0	0	0	0	0	0	0	0	0	0	0	0	0
D008065	0	0	0	0	0	0	0	0	0	0	0	0	0	0	0	0	0	0	0	0	0	0	0	0	0	0	0	0	0	0	0	0	0	0	0	0	0	0	0	0	0	0	0	0	0	0	0	0	0
D023921	0	0	0	0	0	0	0	0	0	0	0	0	0	0	0	0	0	0	0	0	0	0	0	0	0	0	0	0	0	0	0	0	0	0	0	0	0	0	0	0	0	0	0	0	0	0	0	0	0
D004931	0	0	0	0	0	0	0	0	0	0	0	0	0	0	0	0	0	0	0	0	0	0	0	0	0	0	0	0	0	0	0	0	0	0	0	0	0	0	0	0	0	0	0	0	0	0	0	0	0
D049068	0	0	0	0	0	0	0	0	0	0	0	0	0	0	0	0	0	0	0	0	0	0	0	0	0	0	0	0	0	0	0	0	0	0	0	0	0	0	0	0	0	0	0	0	0	0	0	0	0
D054546	0	0	0	0	0	0	0	0	0	0	0	0	0	0	0	0	0	0	0	0	0	0	0	0	0	0	0	0	0	0	0	0	0	0	0	0	0	0	0	0	0	0	0	0	0	0	0	0	0
D017359	0	0	0	0	0	0	0	0	0	0	0	0	0	0	0	0	0	0	0	0	0	0	0	0	0	0	0	0	0	0	0	0	0	0	0	0	0	0	0	0	0	0	0	0	0	0	0	0	0
D013705	0	0	0	0	0	0	0	0	0	0	0	0	0	0	0	0	0	0	0	0	0	0	0	0	0	0	0	0	0	0	0	0	0	0	0	0	0	0	0	0	0	0	0	0	0	0	0	0	0
D012560	0	0	0	0	0	0	0	0	0	0	0	0	0	0	0	0	0	0	0	0	0	0	0	0	0	0	0	0	0	0	0	0	0	0	0	0	0	0	0	0	0	0	0	0	0	0	0	0	0
D018233	0	0	0	0	0	0	0	0	0	0	0	0	0	0	0	0	0	0	0	0	0	0	0	0	0	0	0	0	0	0	0	0	0	0	0	0	0	0	0	0	0	0	0	0	0	0	0	0	0
D047808	0	0	0	0	0	0	0	0	0	0	0	0	0	0	0	0	0	0	0	0	0	0	0	0	0	0	0	0	0	0	0	0	0	0	0	0	0	0	0	0	0	0	0	0	0	0	0	0	0
D018230	0	0	0	0	0	0	0	0	0	0	0	0	0	0	0	0	0	0	0	0	0	0	0	0	0	0	0	0	0	0	0	0	0	0	0	0	0	0	0	0	0	0	0	0	0	0	0	0	0
D016538	0	0	0	0	0	0	0	0	0	0	0	0	0	0	0	0	0	0	0	0	0	0	0	0	0	0	0	0	0	0	0	0	0	0	0	0	0	0	0	0	0	0	0	0	0	0	0	0	0
D017092	0	0	0	0	0	0	0	0	0	0	0	0	0	0	0	0	0	0	0	0	0	0	0	0	0	0	0	0	0	0	0	0	0	0	0	0	0	0	0	0	0	0	0	0	0	0	0	0	0
D003639	0	0	0	0	0	0	0	0	0	0	0	0	0	0	0	0	0	0	0	0	0	0	0	0	0	0	0	0	0	0	0	0	0	0	0	0	0	0	0	0	0	0	0	0	0	0	0	0	0
D018814	0	0	0	0	0	0	0	0	0	0	0	0	0	0	0	0	0	0	0	0	0	0	0	0	0	0	0	0	0	0	0	0	0	0	0	0	0	0	0	0	0	0	0	0	0	0	0	0	0
D014604	0	0	0	0	0	0	0	0	0	0	0	0	0	0	0	0	0	0	0	0	0	0	0	0	0	0	0	0	0	0	0	0	0	0	0	0	0	0	0	0	0	0	0	0	0	0	0	0	0
D008413	0	0	0	0	0	0	0	0	0	0	0	0	0	0	0	0	0	0	0	0	0	0	0	0	0	0	0	0	0	0	0	0	0	0	0	0	0	0	0	0	0	0	0	0	0	0	0	0	0
D015812	0	0	0	0	0	0	0	0	0	0	0	0	0	0	0	0	0	0	0	0	0	0	0	0	0	0	0	0	0	0	0	0	0	0	0	0	0	0	0	0	0	0	0	0	0	0	0	0	0
D012536	0	0	0	0	0	0	0	0	0	0	0	0	0	0	0	0	0	0	0	0	0	0	0	0	0	0	0	0	0	0	0	0	0	0	0	0	0	0	0	0	0	0	0	0	0	0	0	0	0
D006044	0	0	0	0	0	0	0	0	0	0	0	0	0	0	0	0	0	0	0	0	0	0	0	0	0	0	0	0	0	0	0	0	0	0	0	0	0	0	0	0	0	0	0	0	0	0	0	0	0
D000857	0	0	0	0	0	0	0	0	0	0	0	0	0	0	0	0	0	0	0	0	0	0	0	0	0	0	0	0	0	0	0	0	0	0	0	0	0	0	0	0	0	0	0	0	0	0	0	0	0
D015594	0	0	0	0	0	0	0	0	0	0	0	0	0	0	0	0	0	0	0	0	0	0	0	0	0	0	0	0	0	0	0	0	0	0	0	0	0	0	0	0	0	0	0	0	0	0	0	0	0
D009393	0	0	0	0	0	0	0	0	0	0	0	0	0	0	0	0	0	0	0	0	0	0	0	0	0	0	0	0	0	0	0	0	0	0	0	0	0	0	0	0	0	0	0	0	0	0	0	0	0
D001206	0	0	0	0	0	0	0	0	0	0	0	0	0	0	0	0	0	0	0	0	0	0	0	0	0	0	0	0	0	0	0	0	0	0	0	0	0	0	0	0	0	0	0	0	0	0	0	0	0
D017250	0	0	0	0	0	0	0	0	0	0	0	0	0	0	0	0	0	0	0	0	0	0	0	0	0	0	0	0	0	0	0	0	0	0	0	0	0	0	0	0	0	0	0	0	0	0	0	0	0
D010244	0	0	0	0	0	0	0	0	0	0	0	0	0	0	0	0	0	0	0	0	0	0	0	0	0	0	0	0	0	0	0	0	0	0	0	0	0	0	0	0	0	0	0	0	0	0	0	0	0
D053206	0	0	0	0	0	0	0	0	0	0	0	0	0	0	0	0	0	0	0	0	0	0	0	0	0	0	0	0	0	0	0	0	0	0	0	0	0	0	0	0	0	0	0	0	0	0	0	0	0
D052245	0	0	0	0	0	0	0	0	0	0	0	0	0	0	0	0	0	0	0	0	0	0	0	0	0	0	0	0	0	0	0	0	0	0	0	0	0	0	0	0	0	0	0	0	0	0	0	0	0
D054081	0	0	0	0	0	0	0	0	0	0	0	0	0	0	0	0	0	0	0	0	0	0	0	0	0	0	0	0	0	0	0	0	0	0	0	0	0	0	0	0	0	0	0	0	0	0	0	0	0
D014515	0	0	0	0	0	0	0	0	0	0	0	0	0	0	0	0	0	0	0	0	0	0	0	0	0	0	0	0	0	0	0	0	0	0	0	0	0	0	0	0	0	0	0	0	0	0	0	0	0
D002805	0	0	0	0	0	0	0	0	0	0	0	0	0	0	0	0	0	0	0	0	0	0	0	0	0	0	0	0	0	0	0	0	0	0	0	0	0	0	0	0	0	0	0	0	0	0	0	0	0
D050815	0	0	0	0	0	0	0	0	0	0	0	0	0	0	0	0	0	0	0	0	0	0	0	0	0	0	0	0	0	0	0	0	0	0	0	0	0	0	0	0	0	0	0	0	0	0	0	0	0
D003555	0	0	0	0	0	0	0	0	0	0	0	0	0	0	0	0	0	0	0	0	0	0	0	0	0	0	0	0	0	0	0	0	0	0	0	0	0	0	0	0	0	0	0	0	0	0	0	0	0
D019294	0	0	0	0	0	0	0	0	0	0	0	0	0	0	0	0	0	0	0	0	0	0	0	0	0	0	0	0	0	0	0	0	0	0	0	0	0	0	0	0	0	0	0	0	0	0	0	0	0
[truncated: 1,547 more columns]
