# Supplementary material for: Conserved Disease Modules Extracted From Multilayer Heterogeneous Disease and Gene Networks for Understanding Disease Mechanisms and Predicting Disease Treatments
Source: Front Genet. 2019 Jan 18;9:745. doi: 10.3389/fgene.2018.00745 (PMC6346701; doi:10.3389/fgene.2018.00745)
Supplement: Table S3 — Human diseases similarity data based on GO terms. [file Table_3.XLSX]

## Sheet: Sheet1
		Adenocarcinoma, Mucinous	Hemorrhagic fevers, Viral	Hepatitis, Autoimmune	Hypertension, Pulmonary	Infertility, Male	Kidney tubular necrosis, acute	Labor, Premature	Mycobacterium infection, Atypical	Myoclonic epilepsies, Progressive	Myoclonic epilepsy, Juvenile	Myopathies, Nemaline	Pemphigoid, Bullous	Pleural effusion, Malignant	Prostatic hypertrophy, Benign	Purpura, Thrombocytopenic, Idiopathic	Skin disease, Genetic	Spastic paraplegia, Hereditary	Stress disorder, post-traumatic	Supranuclear palsy, progressive	Thrombocythemia, Hemorrhagic	AIDS	Abortion	Abruption placentae	Achalasia and cardiospasm	Acne	Acromegaly	Actinic keratosis	Adenocarcinoma	Adenoid cystic cancer	Adenoma	Thyroid Neoplasms	Adenoviridae infections	Adrenocortical Hyperfunction	Adrenal Insufficiency	Adrenal Gland Neoplasms	Adrenoleukodystrophy	Advanced cancer	Osteopetrosis	Liver Diseases, Alcoholic	Digestive System Diseases	Alopecia	Alveolar bone loss	Alzheimer disease	Amaurosis congenita of leber I	Chorioamnionitis	Amyloidosis	Amyotrophic Lateral Sclerosis	Anemia
Disease Name	Mesh id	D002288	D006482	D019693	D006976	D007248	D007683	D007752	D009165	D020191	D020190	D017696	D010391	D016066	D011470	D016553	D012873	D015419	D013313	D013494	D013920	D000386	D000028	D000037	D004931	D000152	D000172	D055623	D000230	D003528	D000236	D013964	D000257	D000308	D000309	D000310	D000326		D010022	D008108	D004066	D000505	D016301	D000544	C536600	D002821	D000686	D000690	D000740
Adenocarcinoma, Mucinous	D002288	1	0.357	0.284	0.284	0.33	0.39	0.359	0.324	0.323	0.318	0.339	0.402	0.346	0.344	0.341	0.375	0.403	0.335	0.41	0.44	0.412	0.315	0.315	0.288	0.355	0.314	0.348	0.316	0.329	0.314	0.154	0.327	0.409	0.274	0.302	0.334	0.308	0.314	0.312	0.303	0.333	0.315	0.304	0.283	0.305	0.298	0.325	0.293
Hemorrhagic fevers, Viral	D006482	0.357	1	0.152	0.654	0.575	0.696	0.774	0.767	0.188	0.423	0.374	0.79	0.776	0.657	0.756	0.654	0.475	0.621	0.441	0.423	0.52	0.681	0.531	0.546	0.547	0.623	0.564	0.665	0.564	0.678	0.179	0.635	0.569	0.479	0.739	0.573	0.671	0.509	0.724	0.765	0.804	0.704	0.614	0.402	0.731	0.63	0.643	0.721
Hepatitis, Autoimmune	D019693	0.284	0.152	1	0.154	0.237	0.201	0.164	0.151	0.248	0.149	0.166	0.182	0.156	0.195	0.165	0.225	0.164	0.178	0.197	0.326	0.194	0.17	0.258	0.14	0.231	0.206	0.251	0.163	0.162	0.197	0.225	0.176	0.198	0.181	0.188	0.223	0.173	0.187	0.155	0.153	0.156	0.162	0.176	0.227	0.182	0.163	0.177	0.151
Hypertension, Pulmonary	D006976	0.284	0.654	0.154	1	0.643	0.583	0.67	0.668	0.215	0.467	0.444	0.601	0.694	0.662	0.632	0.675	0.441	0.573	0.449	0.368	0.485	0.692	0.59	0.531	0.533	0.649	0.606	0.695	0.622	0.674	0.189	0.686	0.553	0.472	0.64	0.564	0.659	0.554	0.631	0.672	0.703	0.652	0.657	0.463	0.763	0.649	0.703	0.695
Infertility, Male	D007248	0.33	0.575	0.237	0.643	1	0.578	0.59	0.595	0.274	0.428	0.396	0.596	0.615	0.639	0.586	0.63	0.474	0.555	0.421	0.367	0.514	0.662	0.617	0.526	0.508	0.649	0.568	0.638	0.591	0.675	0.226	0.663	0.541	0.507	0.611	0.585	0.626	0.561	0.578	0.621	0.637	0.558	0.643	0.465	0.632	0.611	0.663	0.615
Kidney tubular necrosis, acute	D007683	0.39	0.696	0.201	0.583	0.578	1	0.611	0.632	0.253	0.442	0.351	0.609	0.643	0.621	0.601	0.577	0.476	0.564	0.49	0.45	0.523	0.596	0.523	0.506	0.536	0.584	0.537	0.597	0.53	0.591	0.179	0.582	0.551	0.531	0.599	0.566	0.596	0.519	0.611	0.621	0.629	0.577	0.547	0.423	0.599	0.547	0.594	0.589
Labor, Premature	D007752	0.359	0.774	0.164	0.67	0.59	0.611	1	0.737	0.192	0.434	0.393	0.697	0.735	0.654	0.682	0.652	0.454	0.648	0.45	0.406	0.521	0.687	0.549	0.531	0.541	0.642	0.545	0.696	0.552	0.674	0.175	0.656	0.57	0.466	0.659	0.593	0.672	0.498	0.72	0.75	0.762	0.784	0.652	0.396	0.752	0.659	0.655	0.717
Mycobacterium infection, Atypical	D009165	0.324	0.767	0.151	0.668	0.595	0.632	0.737	1	0.186	0.463	0.378	0.641	0.718	0.666	0.73	0.651	0.47	0.653	0.427	0.385	0.503	0.72	0.546	0.598	0.58	0.622	0.563	0.696	0.552	0.677	0.19	0.664	0.546	0.521	0.654	0.596	0.692	0.516	0.752	0.749	0.769	0.707	0.64	0.386	0.694	0.657	0.655	0.774
Myoclonic epilepsies, Progressive	D020191	0.323	0.188	0.248	0.215	0.274	0.253	0.192	0.186	1	0.311	0.169	0.198	0.205	0.263	0.207	0.226	0.189	0.188	0.258	0.25	0.268	0.216	0.24	0.224	0.234	0.247	0.262	0.207	0.246	0.225	0.353	0.236	0.345	0.289	0.233	0.25	0.216	0.233	0.209	0.21	0.186	0.196	0.212	0.252	0.219	0.228	0.231	0.194
Myoclonic epilepsy, Juvenile	D020190	0.318	0.423	0.149	0.467	0.428	0.442	0.434	0.463	0.311	1	0.463	0.387	0.442	0.459	0.421	0.427	0.378	0.438	0.504	0.325	0.399	0.422	0.423	0.479	0.442	0.451	0.506	0.454	0.474	0.433	0.186	0.424	0.503	0.38	0.467	0.412	0.46	0.481	0.464	0.438	0.422	0.474	0.39	0.384	0.44	0.393	0.411	0.438
Myopathies, Nemaline	D017696	0.339	0.374	0.166	0.444	0.396	0.351	0.393	0.378	0.169	0.463	1	0.4	0.405	0.376	0.362	0.439	0.401	0.35	0.364	0.312	0.432	0.355	0.382	0.457	0.367	0.366	0.433	0.4	0.432	0.357	0.147	0.368	0.356	0.321	0.381	0.381	0.343	0.435	0.356	0.355	0.384	0.414	0.349	0.373	0.385	0.338	0.369	0.362
Pemphigoid, Bullous	D010391	0.402	0.79	0.182	0.601	0.596	0.609	0.697	0.641	0.198	0.387	0.4	1	0.739	0.608	0.764	0.644	0.497	0.568	0.428	0.426	0.547	0.602	0.534	0.498	0.511	0.614	0.568	0.594	0.542	0.605	0.182	0.59	0.564	0.446	0.596	0.544	0.62	0.527	0.625	0.623	0.705	0.616	0.567	0.383	0.617	0.575	0.583	0.613
Pleural effusion, Malignant	D016066	0.346	0.776	0.156	0.694	0.615	0.643	0.735	0.718	0.205	0.442	0.405	0.739	1	0.659	0.727	0.695	0.435	0.615	0.475	0.416	0.542	0.669	0.537	0.552	0.58	0.638	0.609	0.664	0.571	0.656	0.179	0.681	0.576	0.482	0.657	0.583	0.662	0.534	0.69	0.683	0.762	0.686	0.647	0.436	0.705	0.649	0.675	0.689
Prostatic hypertrophy, Benign	D011470	0.344	0.657	0.195	0.662	0.639	0.621	0.654	0.666	0.263	0.459	0.376	0.608	0.659	1	0.688	0.68	0.45	0.588	0.458	0.388	0.536	0.704	0.574	0.558	0.555	0.666	0.601	0.691	0.603	0.695	0.217	0.68	0.553	0.494	0.638	0.598	0.681	0.553	0.651	0.683	0.701	0.623	0.654	0.412	0.709	0.656	0.685	0.694
Purpura, Thrombocytopenic, Idiopathic	D016553	0.341	0.756	0.165	0.632	0.586	0.601	0.682	0.73	0.207	0.421	0.362	0.764	0.727	0.688	1	0.633	0.46	0.607	0.432	0.396	0.509	0.698	0.537	0.525	0.488	0.646	0.553	0.63	0.541	0.668	0.207	0.636	0.555	0.484	0.643	0.563	0.733	0.526	0.674	0.716	0.755	0.654	0.615	0.391	0.676	0.616	0.622	0.742
Skin disease, Genetic	D012873	0.375	0.654	0.225	0.675	0.63	0.577	0.652	0.651	0.226	0.427	0.439	0.644	0.695	0.68	0.633	1	0.45	0.581	0.441	0.418	0.531	0.663	0.58	0.557	0.549	0.646	0.596	0.684	0.553	0.664	0.178	0.676	0.559	0.476	0.618	0.639	0.646	0.527	0.631	0.631	0.698	0.633	0.648	0.433	0.667	0.634	0.673	0.667
Spastic paraplegia, Hereditary	D015419	0.403	0.475	0.164	0.441	0.474	0.476	0.454	0.47	0.189	0.378	0.401	0.497	0.435	0.45	0.46	0.45	1	0.467	0.334	0.309	0.538	0.451	0.405	0.461	0.421	0.421	0.378	0.478	0.488	0.439	0.117	0.44	0.437	0.407	0.399	0.454	0.463	0.416	0.458	0.453	0.471	0.442	0.427	0.342	0.422	0.432	0.452	0.449
Stress disorder, post-traumatic	D013313	0.335	0.621	0.178	0.573	0.555	0.564	0.648	0.653	0.188	0.438	0.35	0.568	0.615	0.588	0.607	0.581	0.467	1	0.466	0.345	0.478	0.604	0.517	0.487	0.484	0.583	0.492	0.613	0.501	0.597	0.159	0.608	0.508	0.416	0.606	0.556	0.601	0.478	0.599	0.649	0.623	0.589	0.581	0.401	0.606	0.603	0.633	0.605
Supranuclear palsy, progressive	D013494	0.41	0.441	0.197	0.449	0.421	0.49	0.45	0.427	0.258	0.504	0.364	0.428	0.475	0.458	0.432	0.441	0.334	0.466	1	0.48	0.415	0.417	0.457	0.409	0.448	0.452	0.453	0.448	0.487	0.417	0.184	0.414	0.493	0.39	0.478	0.415	0.432	0.485	0.419	0.423	0.45	0.432	0.391	0.447	0.461	0.375	0.4	0.406
Thrombocythemia, Hemorrhagic	D013920	0.44	0.423	0.326	0.368	0.367	0.45	0.406	0.385	0.25	0.325	0.312	0.426	0.416	0.388	0.396	0.418	0.309	0.345	0.48	1	0.408	0.356	0.39	0.316	0.422	0.404	0.436	0.367	0.405	0.361	0.196	0.368	0.389	0.333	0.384	0.359	0.396	0.44	0.366	0.361	0.394	0.377	0.343	0.343	0.383	0.326	0.356	0.356
AIDS	D000386	0.412	0.52	0.194	0.485	0.514	0.523	0.521	0.503	0.268	0.399	0.432	0.547	0.542	0.536	0.509	0.531	0.538	0.478	0.415	0.408	1	0.508	0.47	0.454	0.537	0.526	0.489	0.529	0.531	0.497	0.168	0.526	0.513	0.442	0.474	0.503	0.539	0.526	0.551	0.501	0.518	0.518	0.479	0.405	0.497	0.495	0.505	0.501
Abortion	D000028	0.315	0.681	0.17	0.692	0.662	0.596	0.687	0.72	0.216	0.422	0.355	0.602	0.669	0.704	0.698	0.663	0.451	0.604	0.417	0.356	0.508	1	0.577	0.576	0.533	0.68	0.526	0.758	0.553	0.795	0.185	0.802	0.544	0.481	0.669	0.599	0.716	0.499	0.677	0.767	0.786	0.625	0.823	0.39	0.723	0.765	0.768	0.809
Abruption placentae	D000037	0.315	0.531	0.258	0.59	0.617	0.523	0.549	0.546	0.24	0.423	0.382	0.534	0.537	0.574	0.537	0.58	0.405	0.517	0.457	0.39	0.47	0.577	1	0.461	0.526	0.607	0.538	0.652	0.52	0.59	0.215	0.53	0.56	0.417	0.643	0.554	0.582	0.542	0.536	0.533	0.546	0.541	0.53	0.427	0.594	0.514	0.532	0.553
Achalasia and cardiospasm	D004931	0.288	0.546	0.14	0.531	0.526	0.506	0.531	0.598	0.224	0.479	0.457	0.498	0.552	0.558	0.525	0.557	0.461	0.487	0.409	0.316	0.454	0.576	0.461	1	0.48	0.555	0.567	0.557	0.532	0.556	0.199	0.556	0.532	0.63	0.52	0.526	0.564	0.49	0.595	0.568	0.603	0.561	0.518	0.369	0.54	0.561	0.521	0.571
Acne	D000152	0.355	0.547	0.231	0.533	0.508	0.536	0.541	0.58	0.234	0.442	0.367	0.511	0.58	0.555	0.488	0.549	0.421	0.484	0.448	0.422	0.537	0.533	0.526	0.48	1	0.521	0.542	0.561	0.518	0.512	0.179	0.505	0.581	0.467	0.547	0.52	0.534	0.525	0.566	0.528	0.529	0.538	0.476	0.402	0.557	0.509	0.502	0.526
Acromegaly	D000172	0.314	0.623	0.206	0.649	0.649	0.584	0.642	0.622	0.247	0.451	0.366	0.614	0.638	0.666	0.646	0.646	0.421	0.583	0.452	0.404	0.526	0.68	0.607	0.555	0.521	1	0.557	0.663	0.593	0.748	0.23	0.665	0.555	0.503	0.667	0.584	0.835	0.574	0.653	0.676	0.724	0.636	0.658	0.417	0.695	0.65	0.653	0.659
Actinic keratosis	D055623	0.348	0.564	0.251	0.606	0.568	0.537	0.545	0.563	0.262	0.506	0.433	0.568	0.609	0.601	0.553	0.596	0.378	0.492	0.453	0.436	0.489	0.526	0.538	0.567	0.542	0.557	1	0.544	0.582	0.54	0.263	0.545	0.656	0.466	0.558	0.509	0.558	0.552	0.572	0.526	0.549	0.593	0.492	0.445	0.568	0.505	0.526	0.537
Adenocarcinoma	D000230	0.316	0.665	0.163	0.695	0.638	0.597	0.696	0.696	0.207	0.454	0.4	0.594	0.664	0.691	0.63	0.684	0.478	0.613	0.448	0.367	0.529	0.758	0.652	0.557	0.561	0.663	0.544	1	0.559	0.734	0.177	0.727	0.559	0.472	0.683	0.611	0.704	0.531	0.669	0.7	0.724	0.642	0.718	0.419	0.716	0.713	0.72	0.762
Adenoid cystic cancer	D003528	0.329	0.564	0.162	0.622	0.591	0.53	0.552	0.552	0.246	0.474	0.432	0.542	0.571	0.603	0.541	0.553	0.488	0.501	0.487	0.405	0.531	0.553	0.52	0.532	0.518	0.593	0.582	0.559	1	0.554	0.204	0.56	0.575	0.501	0.552	0.522	0.59	0.576	0.561	0.577	0.579	0.558	0.521	0.502	0.582	0.522	0.554	0.547
Adenoma	D000236	0.314	0.678	0.197	0.674	0.675	0.591	0.674	0.677	0.225	0.433	0.357	0.605	0.656	0.695	0.668	0.664	0.439	0.597	0.417	0.361	0.497	0.795	0.59	0.556	0.512	0.748	0.54	0.734	0.554	1	0.212	0.753	0.533	0.491	0.72	0.623	0.737	0.525	0.673	0.764	0.754	0.62	0.75	0.394	0.737	0.71	0.732	0.79
Thyroid Neoplasms	D013964	0.154	0.179	0.225	0.189	0.226	0.179	0.175	0.19	0.353	0.186	0.147	0.182	0.179	0.217	0.207	0.178	0.117	0.159	0.184	0.196	0.168	0.185	0.215	0.199	0.179	0.23	0.263	0.177	0.204	0.212	1	0.197	0.289	0.258	0.223	0.192	0.198	0.202	0.212	0.197	0.174	0.209	0.178	0.244	0.202	0.188	0.184	0.182
Adenoviridae infections	D000257	0.327	0.635	0.176	0.686	0.663	0.582	0.656	0.664	0.236	0.424	0.368	0.59	0.681	0.68	0.636	0.676	0.44	0.608	0.414	0.368	0.526	0.802	0.53	0.556	0.505	0.665	0.545	0.727	0.56	0.753	0.197	1	0.532	0.466	0.6	0.578	0.691	0.502	0.63	0.694	0.728	0.602	0.82	0.398	0.677	0.777	0.808	0.739
Adrenocortical Hyperfunction	D000308	0.409	0.569	0.198	0.553	0.541	0.551	0.57	0.546	0.345	0.503	0.356	0.564	0.576	0.553	0.555	0.559	0.437	0.508	0.493	0.389	0.513	0.544	0.56	0.532	0.581	0.555	0.656	0.559	0.575	0.533	0.289	0.532	1	0.511	0.588	0.562	0.56	0.529	0.547	0.551	0.576	0.541	0.488	0.474	0.558	0.498	0.506	0.523
Adrenal Insufficiency	D000309	0.274	0.479	0.181	0.472	0.507	0.531	0.466	0.521	0.289	0.38	0.321	0.446	0.482	0.494	0.484	0.476	0.407	0.416	0.39	0.333	0.442	0.481	0.417	0.63	0.467	0.503	0.466	0.472	0.501	0.491	0.258	0.466	0.511	1	0.492	0.538	0.53	0.432	0.514	0.513	0.527	0.476	0.436	0.434	0.489	0.44	0.447	0.47
Adrenal Gland Neoplasms	D000310	0.302	0.739	0.188	0.64	0.611	0.599	0.659	0.654	0.233	0.467	0.381	0.596	0.657	0.638	0.643	0.618	0.399	0.606	0.478	0.384	0.474	0.669	0.643	0.52	0.547	0.667	0.558	0.683	0.552	0.72	0.223	0.6	0.588	0.492	1	0.608	0.656	0.542	0.661	0.713	0.703	0.632	0.591	0.449	0.75	0.606	0.596	0.682
Adrenoleukodystrophy	D000326	0.334	0.573	0.223	0.564	0.585	0.566	0.593	0.596	0.25	0.412	0.381	0.544	0.583	0.598	0.563	0.639	0.454	0.556	0.415	0.359	0.503	0.599	0.554	0.526	0.52	0.584	0.509	0.611	0.522	0.623	0.192	0.578	0.562	0.538	0.608	1	0.574	0.493	0.574	0.58	0.603	0.577	0.561	0.425	0.639	0.567	0.574	0.581
Advanced cancer		0.308	0.671	0.173	0.659	0.626	0.596	0.672	0.692	0.216	0.46	0.343	0.62	0.662	0.681	0.733	0.646	0.463	0.601	0.432	0.396	0.539	0.716	0.582	0.564	0.534	0.835	0.558	0.704	0.59	0.737	0.198	0.691	0.56	0.53	0.656	0.574	1	0.542	0.681	0.731	0.76	0.657	0.675	0.404	0.705	0.658	0.661	0.763
Osteopetrosis	D010022	0.314	0.509	0.187	0.554	0.561	0.519	0.498	0.516	0.233	0.481	0.435	0.527	0.534	0.553	0.526	0.527	0.416	0.478	0.485	0.44	0.526	0.499	0.542	0.49	0.525	0.574	0.552	0.531	0.576	0.525	0.202	0.502	0.529	0.432	0.542	0.493	0.542	1	0.529	0.528	0.535	0.537	0.484	0.459	0.551	0.464	0.494	0.508
Liver Diseases, Alcoholic	D008108	0.312	0.724	0.155	0.631	0.578	0.611	0.72	0.752	0.209	0.464	0.356	0.625	0.69	0.651	0.674	0.631	0.458	0.599	0.419	0.366	0.551	0.677	0.536	0.595	0.566	0.653	0.572	0.669	0.561	0.673	0.212	0.63	0.547	0.514	0.661	0.574	0.681	0.529	1	0.751	0.709	0.76	0.62	0.395	0.696	0.708	0.608	0.785
Digestive System Diseases	D004066	0.303	0.765	0.153	0.672	0.621	0.621	0.75	0.749	0.21	0.438	0.355	0.623	0.683	0.683	0.716	0.631	0.453	0.649	0.423	0.361	0.501	0.767	0.533	0.568	0.528	0.676	0.526	0.7	0.577	0.764	0.197	0.694	0.551	0.513	0.713	0.58	0.731	0.528	0.751	1	0.776	0.732	0.692	0.398	0.79	0.69	0.67	0.802
Alopecia	D000505	0.333	0.804	0.156	0.703	0.637	0.629	0.762	0.769	0.186	0.422	0.384	0.705	0.762	0.701	0.755	0.698	0.471	0.623	0.45	0.394	0.518	0.786	0.546	0.603	0.529	0.724	0.549	0.724	0.579	0.754	0.174	0.728	0.576	0.527	0.703	0.603	0.76	0.535	0.709	0.776	1	0.683	0.728	0.402	0.758	0.703	0.729	0.79
Alveolar bone loss	D016301	0.315	0.704	0.162	0.652	0.558	0.577	0.784	0.707	0.196	0.474	0.414	0.616	0.686	0.623	0.654	0.633	0.442	0.589	0.432	0.377	0.518	0.625	0.541	0.561	0.538	0.636	0.593	0.642	0.558	0.62	0.209	0.602	0.541	0.476	0.632	0.577	0.657	0.537	0.76	0.732	0.683	1	0.589	0.417	0.734	0.61	0.595	0.678
Alzheimer disease	D000544	0.304	0.614	0.176	0.657	0.643	0.547	0.652	0.64	0.212	0.39	0.349	0.567	0.647	0.654	0.615	0.648	0.427	0.581	0.391	0.343	0.479	0.823	0.53	0.518	0.476	0.658	0.492	0.718	0.521	0.75	0.178	0.82	0.488	0.436	0.591	0.561	0.675	0.484	0.62	0.692	0.728	0.589	1	0.384	0.678	0.767	0.799	0.766
Amaurosis congenita of leber I	C536600	0.283	0.402	0.227	0.463	0.465	0.423	0.396	0.386	0.252	0.384	0.373	0.383	0.436	0.412	0.391	0.433	0.342	0.401	0.447	0.343	0.405	0.39	0.427	0.369	0.402	0.417	0.445	0.419	0.502	0.394	0.244	0.398	0.474	0.434	0.449	0.425	0.404	0.459	0.395	0.398	0.402	0.417	0.384	1	0.44	0.367	0.401	0.367
Chorioamnionitis	D002821	0.305	0.731	0.182	0.763	0.632	0.599	0.752	0.694	0.219	0.44	0.385	0.617	0.705	0.709	0.676	0.667	0.422	0.606	0.461	0.383	0.497	0.723	0.594	0.54	0.557	0.695	0.568	0.716	0.582	0.737	0.202	0.677	0.558	0.489	0.75	0.639	0.705	0.551	0.696	0.79	0.758	0.734	0.678	0.44	1	0.681	0.682	0.748
Amyloidosis	D000686	0.298	0.63	0.163	0.649	0.611	0.547	0.659	0.657	0.228	0.393	0.338	0.575	0.649	0.656	0.616	0.634	0.432	0.603	0.375	0.326	0.495	0.765	0.514	0.561	0.509	0.65	0.505	0.713	0.522	0.71	0.188	0.777	0.498	0.44	0.606	0.567	0.658	0.464	0.708	0.69	0.703	0.61	0.767	0.367	0.681	1	0.797	0.761
Amyotrophic Lateral Sclerosis	D000690	0.325	0.643	0.177	0.703	0.663	0.594	0.655	0.655	0.231	0.411	0.369	0.583	0.675	0.685	0.622	0.673	0.452	0.633	0.4	0.356	0.505	0.768	0.532	0.521	0.502	0.653	0.526	0.72	0.554	0.732	0.184	0.808	0.506	0.447	0.596	0.574	0.661	0.494	0.608	0.67	0.729	0.595	0.799	0.401	0.682	0.797	1	0.718
Anemia	D000740	0.293	0.721	0.151	0.695	0.615	0.589	0.717	0.774	0.194	0.438	0.362	0.613	0.689	0.694	0.742	0.667	0.449	0.605	0.406	0.356	0.501	0.809	0.553	0.571	0.526	0.659	0.537	0.762	0.547	0.79	0.182	0.739	0.523	0.47	0.682	0.581	0.763	0.508	0.785	0.802	0.79	0.678	0.766	0.367	0.748	0.761	0.718	1
Angiomyolipoma	D018207	0.341	0.65	0.184	0.635	0.602	0.601	0.663	0.724	0.238	0.482	0.387	0.636	0.716	0.654	0.737	0.648	0.428	0.579	0.481	0.435	0.542	0.626	0.562	0.542	0.527	0.66	0.623	0.624	0.609	0.624	0.242	0.626	0.566	0.522	0.614	0.54	0.665	0.574	0.678	0.656	0.699	0.67	0.58	0.443	0.647	0.581	0.582	0.661
Spondylitis, Ankylosing	D013167	0.295	0.581	0.164	0.582	0.547	0.512	0.569	0.582	0.225	0.415	0.365	0.553	0.582	0.559	0.679	0.541	0.404	0.516	0.427	0.372	0.487	0.587	0.55	0.511	0.525	0.602	0.491	0.582	0.507	0.597	0.185	0.555	0.514	0.482	0.627	0.527	0.675	0.512	0.551	0.594	0.616	0.543	0.541	0.375	0.605	0.556	0.541	0.657
Ankylosis	D000844	0.27	0.593	0.147	0.784	0.595	0.551	0.581	0.555	0.228	0.432	0.448	0.572	0.622	0.582	0.581	0.58	0.431	0.503	0.462	0.388	0.458	0.555	0.545	0.476	0.518	0.61	0.588	0.577	0.65	0.543	0.199	0.558	0.555	0.516	0.589	0.491	0.602	0.563	0.567	0.585	0.608	0.571	0.51	0.515	0.72	0.515	0.553	0.559
Anorexia nervosa	D000856	0.312	0.714	0.16	0.694	0.626	0.603	0.71	0.724	0.214	0.467	0.363	0.624	0.676	0.669	0.757	0.658	0.432	0.623	0.445	0.371	0.517	0.77	0.546	0.554	0.527	0.746	0.533	0.713	0.572	0.751	0.194	0.713	0.547	0.491	0.721	0.583	0.798	0.533	0.767	0.778	0.783	0.685	0.723	0.42	0.761	0.741	0.703	0.833
Antiphospholipid Syndrome	D016736	0.341	0.592	0.211	0.606	0.632	0.57	0.573	0.564	0.266	0.441	0.394	0.606	0.602	0.643	0.595	0.615	0.447	0.555	0.464	0.415	0.546	0.619	0.651	0.512	0.529	0.757	0.563	0.606	0.586	0.609	0.223	0.588	0.57	0.47	0.58	0.62	0.724	0.569	0.57	0.584	0.667	0.572	0.572	0.424	0.655	0.564	0.589	0.581
Anxiety Disorders	D001008	0.415	0.336	0.313	0.304	0.343	0.377	0.351	0.35	0.238	0.526	0.326	0.336	0.334	0.376	0.316	0.368	0.368	0.374	0.494	0.4	0.426	0.341	0.382	0.354	0.393	0.365	0.386	0.358	0.444	0.348	0.128	0.351	0.381	0.282	0.346	0.374	0.353	0.393	0.352	0.327	0.333	0.357	0.333	0.298	0.321	0.324	0.331	0.325
Aortic Aneurysm	D001014	0.338	0.722	0.163	0.671	0.621	0.595	0.716	0.706	0.207	0.439	0.385	0.723	0.723	0.68	0.795	0.681	0.473	0.611	0.409	0.383	0.521	0.726	0.538	0.568	0.525	0.649	0.559	0.69	0.54	0.724	0.178	0.684	0.562	0.474	0.642	0.587	0.721	0.503	0.684	0.755	0.753	0.683	0.674	0.363	0.692	0.673	0.683	0.782
Aortic valve disease	C563178	0.335	0.626	0.199	0.593	0.641	0.621	0.62	0.62	0.241	0.41	0.364	0.589	0.619	0.65	0.601	0.619	0.432	0.626	0.427	0.372	0.501	0.636	0.544	0.508	0.53	0.617	0.523	0.623	0.54	0.631	0.204	0.666	0.523	0.483	0.61	0.573	0.616	0.513	0.599	0.629	0.637	0.583	0.617	0.428	0.614	0.659	0.65	0.621
Anemia, Aplastic	D000741	0.304	0.706	0.174	0.692	0.647	0.593	0.697	0.693	0.213	0.423	0.372	0.658	0.749	0.671	0.72	0.675	0.457	0.584	0.415	0.366	0.517	0.754	0.552	0.53	0.531	0.677	0.562	0.697	0.574	0.727	0.192	0.713	0.547	0.506	0.647	0.581	0.697	0.519	0.746	0.751	0.747	0.657	0.718	0.42	0.728	0.724	0.709	0.781
Arteriopathy		0.3	0.736	0.181	0.651	0.62	0.582	0.652	0.642	0.251	0.442	0.383	0.621	0.675	0.665	0.654	0.626	0.431	0.568	0.43	0.369	0.497	0.691	0.619	0.537	0.558	0.772	0.539	0.66	0.58	0.762	0.22	0.633	0.533	0.474	0.756	0.583	0.687	0.564	0.652	0.73	0.726	0.649	0.642	0.405	0.759	0.648	0.646	0.695
Arthritis	D001168	0.305	0.684	0.164	0.718	0.64	0.58	0.734	0.772	0.192	0.415	0.355	0.616	0.697	0.688	0.685	0.68	0.442	0.605	0.422	0.369	0.502	0.814	0.557	0.564	0.536	0.661	0.533	0.754	0.544	0.762	0.174	0.764	0.517	0.486	0.652	0.584	0.716	0.504	0.73	0.78	0.781	0.678	0.805	0.387	0.764	0.767	0.753	0.863
Osteonecrosis	D010020	0.324	0.676	0.184	0.714	0.647	0.594	0.656	0.662	0.269	0.447	0.377	0.625	0.659	0.679	0.638	0.671	0.434	0.557	0.428	0.374	0.517	0.712	0.623	0.562	0.561	0.668	0.57	0.687	0.583	0.658	0.226	0.66	0.59	0.483	0.632	0.638	0.66	0.539	0.639	0.662	0.682	0.631	0.652	0.439	0.71	0.659	0.661	0.665
Asthma	D001249	0.301	0.647	0.161	0.7	0.624	0.558	0.683	0.687	0.192	0.4	0.356	0.593	0.669	0.676	0.668	0.662	0.437	0.58	0.4	0.355	0.485	0.834	0.537	0.521	0.492	0.645	0.513	0.737	0.527	0.749	0.167	0.806	0.499	0.446	0.613	0.569	0.705	0.485	0.66	0.734	0.749	0.619	0.863	0.378	0.722	0.758	0.787	0.829
Ataxia telangiectasia	D001260	0.313	0.526	0.294	0.508	0.57	0.601	0.477	0.517	0.34	0.388	0.309	0.462	0.51	0.547	0.466	0.495	0.412	0.461	0.426	0.345	0.513	0.506	0.504	0.44	0.499	0.521	0.499	0.522	0.507	0.538	0.289	0.518	0.523	0.55	0.506	0.492	0.522	0.488	0.514	0.512	0.499	0.461	0.463	0.469	0.508	0.453	0.495	0.467
Atherosclerosis	D050197	0.294	0.618	0.173	0.681	0.631	0.543	0.654	0.648	0.202	0.386	0.352	0.57	0.642	0.664	0.635	0.65	0.418	0.587	0.39	0.348	0.476	0.812	0.534	0.511	0.479	0.65	0.503	0.723	0.508	0.747	0.178	0.809	0.483	0.435	0.605	0.555	0.676	0.488	0.626	0.694	0.72	0.587	0.89	0.38	0.695	0.762	0.796	0.778
Rhinitis, Allergic	D065631	0.315	0.705	0.154	0.698	0.628	0.607	0.724	0.702	0.199	0.421	0.374	0.674	0.743	0.703	0.685	0.681	0.423	0.613	0.436	0.38	0.512	0.751	0.569	0.551	0.545	0.749	0.554	0.711	0.576	0.704	0.174	0.71	0.55	0.489	0.673	0.59	0.762	0.538	0.688	0.714	0.76	0.659	0.697	0.416	0.74	0.684	0.691	0.726
Attention deficit hyperactivity disorder	D001289	0.358	0.543	0.223	0.52	0.574	0.523	0.588	0.574	0.231	0.512	0.392	0.515	0.528	0.572	0.563	0.563	0.401	0.54	0.552	0.401	0.48	0.559	0.62	0.526	0.519	0.63	0.558	0.577	0.529	0.565	0.215	0.53	0.563	0.451	0.584	0.576	0.586	0.545	0.596	0.568	0.56	0.591	0.523	0.426	0.589	0.515	0.523	0.556
Autistic disorder	D001321	0.319	0.629	0.18	0.677	0.661	0.572	0.642	0.626	0.203	0.454	0.382	0.596	0.667	0.669	0.676	0.68	0.448	0.668	0.447	0.352	0.49	0.747	0.553	0.52	0.496	0.646	0.53	0.718	0.553	0.702	0.163	0.759	0.518	0.447	0.611	0.577	0.682	0.508	0.59	0.658	0.718	0.588	0.765	0.438	0.675	0.713	0.78	0.716
Autoimmune disease	D001327	0.309	0.687	0.16	0.686	0.623	0.585	0.697	0.737	0.195	0.412	0.362	0.601	0.698	0.686	0.67	0.666	0.456	0.594	0.401	0.362	0.522	0.831	0.519	0.566	0.516	0.644	0.526	0.738	0.547	0.764	0.17	0.796	0.507	0.477	0.63	0.571	0.703	0.488	0.71	0.758	0.779	0.63	0.816	0.37	0.715	0.758	0.759	0.841
Thyroiditis, Autoimmune	D013967	0.319	0.551	0.184	0.497	0.519	0.512	0.547	0.555	0.289	0.423	0.317	0.539	0.536	0.562	0.554	0.505	0.408	0.509	0.463	0.398	0.474	0.545	0.552	0.532	0.478	0.738	0.52	0.527	0.526	0.618	0.267	0.525	0.509	0.483	0.589	0.523	0.585	0.54	0.576	0.555	0.562	0.571	0.51	0.388	0.554	0.531	0.511	0.532
Azoospermia	D053713	0.338	0.609	0.233	0.655	0.773	0.633	0.621	0.641	0.288	0.448	0.374	0.596	0.654	0.688	0.626	0.649	0.466	0.562	0.444	0.375	0.554	0.686	0.57	0.524	0.54	0.658	0.581	0.67	0.581	0.694	0.23	0.687	0.562	0.557	0.612	0.604	0.654	0.568	0.614	0.657	0.667	0.59	0.656	0.463	0.642	0.642	0.693	0.654
Bacterial infections	D001424	0.352	0.647	0.188	0.641	0.602	0.612	0.657	0.666	0.249	0.413	0.364	0.628	0.667	0.679	0.625	0.673	0.467	0.603	0.418	0.387	0.542	0.674	0.574	0.563	0.523	0.634	0.559	0.657	0.556	0.655	0.207	0.666	0.548	0.469	0.594	0.593	0.667	0.499	0.635	0.663	0.673	0.621	0.641	0.378	0.648	0.693	0.651	0.669
Vaginosis, Bacterial	D016585	0.31	0.712	0.156	0.614	0.539	0.596	0.788	0.747	0.202	0.44	0.358	0.594	0.664	0.627	0.661	0.594	0.448	0.646	0.434	0.381	0.499	0.643	0.53	0.54	0.58	0.623	0.537	0.644	0.544	0.629	0.203	0.604	0.561	0.516	0.644	0.556	0.662	0.496	0.76	0.818	0.685	0.812	0.587	0.402	0.749	0.625	0.585	0.679
Bardet-Biedl Syndrome	D020788	0.32	0.37	0.148	0.451	0.478	0.394	0.386	0.359	0.205	0.358	0.403	0.388	0.406	0.384	0.394	0.433	0.484	0.388	0.34	0.308	0.403	0.375	0.391	0.377	0.377	0.403	0.393	0.404	0.512	0.385	0.148	0.394	0.426	0.421	0.407	0.417	0.397	0.432	0.379	0.376	0.391	0.405	0.387	0.714	0.401	0.375	0.409	0.37
Barrett's esophagus	D001471	0.319	0.701	0.194	0.718	0.688	0.613	0.671	0.674	0.245	0.426	0.363	0.62	0.696	0.699	0.657	0.677	0.426	0.589	0.417	0.383	0.518	0.743	0.549	0.534	0.532	0.685	0.595	0.708	0.587	0.753	0.216	0.749	0.582	0.495	0.695	0.565	0.71	0.547	0.654	0.741	0.757	0.623	0.716	0.421	0.743	0.69	0.744	0.743
Carcinoma, Basal Cell	D002280	0.307	0.753	0.161	0.728	0.64	0.653	0.741	0.741	0.211	0.436	0.38	0.647	0.712	0.725	0.681	0.676	0.451	0.629	0.434	0.361	0.506	0.752	0.569	0.564	0.552	0.669	0.567	0.724	0.571	0.755	0.195	0.706	0.548	0.499	0.718	0.61	0.701	0.547	0.828	0.777	0.776	0.707	0.709	0.419	0.794	0.725	0.7	0.816
Beckwith-Wiedemann Syndrome	D001506	0.259	0.196	0.231	0.206	0.269	0.235	0.191	0.191	0.422	0.216	0.167	0.199	0.202	0.239	0.218	0.211	0.157	0.165	0.214	0.264	0.204	0.211	0.253	0.211	0.213	0.245	0.282	0.187	0.249	0.219	0.506	0.224	0.34	0.301	0.233	0.252	0.218	0.22	0.221	0.206	0.191	0.216	0.199	0.271	0.223	0.205	0.216	0.189
Behavioral Symptoms	D001526	0.304	0.572	0.168	0.657	0.622	0.563	0.623	0.618	0.211	0.493	0.413	0.535	0.62	0.657	0.578	0.649	0.458	0.609	0.453	0.324	0.495	0.665	0.54	0.555	0.501	0.63	0.513	0.679	0.552	0.662	0.173	0.678	0.514	0.438	0.604	0.566	0.624	0.5	0.596	0.629	0.65	0.601	0.662	0.435	0.634	0.694	0.683	0.648
Behcet syndrome	D001528	0.301	0.683	0.158	0.675	0.606	0.571	0.721	0.763	0.196	0.406	0.334	0.616	0.69	0.692	0.724	0.668	0.436	0.612	0.388	0.36	0.493	0.83	0.539	0.563	0.51	0.689	0.524	0.745	0.521	0.762	0.181	0.771	0.511	0.474	0.641	0.575	0.771	0.491	0.72	0.775	0.784	0.66	0.81	0.35	0.739	0.777	0.755	0.875
Biliary Atresia	D001656	0.39	0.699	0.157	0.529	0.502	0.6	0.633	0.615	0.209	0.448	0.365	0.679	0.613	0.587	0.605	0.542	0.502	0.53	0.466	0.446	0.566	0.555	0.461	0.5	0.557	0.534	0.542	0.57	0.509	0.527	0.152	0.531	0.536	0.477	0.539	0.501	0.563	0.484	0.63	0.599	0.616	0.597	0.503	0.367	0.56	0.546	0.535	0.567
Biliary Tract Neoplasms	D001661	0.302	0.519	0.184	0.533	0.577	0.505	0.525	0.513	0.223	0.403	0.341	0.494	0.525	0.538	0.524	0.53	0.417	0.795	0.426	0.332	0.479	0.534	0.501	0.427	0.443	0.548	0.465	0.55	0.499	0.521	0.187	0.544	0.506	0.41	0.563	0.525	0.526	0.482	0.508	0.515	0.521	0.514	0.528	0.448	0.534	0.554	0.595	0.505
Bipolar disorder	D001714	0.329	0.634	0.204	0.682	0.67	0.562	0.716	0.675	0.225	0.434	0.376	0.572	0.656	0.656	0.609	0.687	0.433	0.614	0.436	0.357	0.487	0.751	0.557	0.546	0.499	0.668	0.528	0.718	0.542	0.715	0.188	0.739	0.526	0.455	0.62	0.583	0.668	0.504	0.646	0.705	0.719	0.655	0.769	0.42	0.71	0.706	0.747	0.717
Urinary Bladder Neoplasms	D001749	0.314	0.678	0.16	0.72	0.668	0.589	0.708	0.708	0.205	0.432	0.394	0.634	0.699	0.722	0.672	0.7	0.464	0.625	0.444	0.37	0.512	0.796	0.565	0.585	0.519	0.676	0.553	0.746	0.614	0.746	0.172	0.787	0.536	0.479	0.644	0.592	0.704	0.533	0.714	0.727	0.789	0.65	0.794	0.425	0.74	0.771	0.763	0.792
Bone disease	D001847	0.325	0.67	0.168	0.732	0.669	0.614	0.677	0.667	0.216	0.445	0.423	0.651	0.717	0.697	0.681	0.705	0.473	0.588	0.482	0.399	0.531	0.718	0.583	0.542	0.556	0.74	0.592	0.711	0.636	0.693	0.182	0.717	0.569	0.511	0.633	0.579	0.743	0.61	0.637	0.694	0.811	0.655	0.696	0.472	0.715	0.667	0.709	0.709
Bone marrow disease	D001855	0.336	0.685	0.164	0.676	0.63	0.647	0.67	0.679	0.234	0.453	0.381	0.649	0.71	0.686	0.671	0.656	0.443	0.558	0.453	0.434	0.543	0.687	0.57	0.575	0.537	0.654	0.618	0.664	0.599	0.669	0.225	0.677	0.563	0.515	0.635	0.592	0.682	0.576	0.653	0.679	0.71	0.647	0.629	0.417	0.679	0.64	0.663	0.679
Bone metastases		0.32	0.78	0.149	0.698	0.607	0.617	0.689	0.682	0.193	0.424	0.424	0.67	0.699	0.747	0.737	0.644	0.467	0.596	0.455	0.38	0.478	0.699	0.561	0.516	0.539	0.644	0.565	0.674	0.585	0.689	0.182	0.622	0.556	0.478	0.751	0.579	0.676	0.552	0.655	0.741	0.754	0.641	0.61	0.435	0.797	0.606	0.632	0.717
Brain diseases	D001927	0.319	0.592	0.183	0.675	0.639	0.575	0.637	0.611	0.235	0.434	0.387	0.561	0.621	0.663	0.576	0.652	0.461	0.587	0.413	0.351	0.513	0.677	0.553	0.521	0.517	0.636	0.529	0.701	0.594	0.666	0.189	0.72	0.536	0.439	0.582	0.554	0.629	0.522	0.571	0.63	0.664	0.575	0.704	0.41	0.648	0.711	0.739	0.661
Brain ischemia	D002545	0.319	0.587	0.149	0.608	0.556	0.561	0.58	0.577	0.213	0.498	0.453	0.56	0.628	0.596	0.564	0.571	0.417	0.544	0.531	0.393	0.553	0.59	0.581	0.557	0.507	0.589	0.561	0.61	0.577	0.604	0.188	0.577	0.543	0.445	0.686	0.548	0.579	0.528	0.584	0.578	0.58	0.581	0.527	0.419	0.6	0.553	0.554	0.583
Brain Neoplasms	D001932	0.324	0.672	0.171	0.706	0.648	0.591	0.684	0.678	0.197	0.416	0.383	0.609	0.678	0.705	0.634	0.686	0.462	0.602	0.424	0.374	0.518	0.807	0.539	0.536	0.513	0.672	0.534	0.748	0.567	0.774	0.168	0.808	0.519	0.452	0.621	0.573	0.688	0.514	0.636	0.717	0.779	0.611	0.84	0.408	0.714	0.746	0.792	0.771
Breast Neoplasms	D001943	0.305	0.59	0.176	0.666	0.63	0.542	0.62	0.628	0.216	0.391	0.358	0.547	0.617	0.658	0.599	0.642	0.416	0.565	0.397	0.348	0.477	0.801	0.527	0.511	0.475	0.642	0.498	0.703	0.526	0.736	0.175	0.813	0.489	0.443	0.58	0.554	0.66	0.483	0.591	0.663	0.705	0.564	0.884	0.385	0.664	0.732	0.789	0.745
Bronchial disease	D001982	0.36	0.705	0.189	0.661	0.617	0.624	0.712	0.719	0.219	0.457	0.394	0.63	0.706	0.654	0.634	0.693	0.482	0.625	0.448	0.392	0.55	0.688	0.57	0.577	0.572	0.633	0.565	0.707	0.561	0.662	0.177	0.672	0.574	0.476	0.651	0.618	0.66	0.512	0.777	0.687	0.706	0.676	0.641	0.391	0.686	0.667	0.655	0.716
Bronchial hyperreactivity	D016535	0.301	0.663	0.152	0.615	0.606	0.59	0.643	0.652	0.245	0.475	0.394	0.602	0.635	0.628	0.651	0.565	0.433	0.535	0.411	0.347	0.51	0.643	0.501	0.57	0.53	0.629	0.549	0.606	0.558	0.657	0.241	0.585	0.586	0.555	0.657	0.562	0.624	0.498	0.679	0.714	0.64	0.641	0.557	0.405	0.641	0.582	0.571	0.661
Bronchiectasis	D001987	0.318	0.642	0.158	0.569	0.524	0.573	0.617	0.751	0.207	0.46	0.382	0.563	0.594	0.606	0.694	0.554	0.45	0.55	0.436	0.397	0.49	0.613	0.517	0.545	0.549	0.564	0.561	0.611	0.544	0.596	0.216	0.548	0.564	0.509	0.616	0.551	0.611	0.522	0.692	0.676	0.65	0.647	0.526	0.393	0.621	0.558	0.535	0.648
Bronchiolitis	D001988	0.366	0.802	0.15	0.661	0.566	0.648	0.749	0.76	0.173	0.436	0.396	0.699	0.755	0.64	0.664	0.647	0.49	0.62	0.447	0.412	0.551	0.658	0.506	0.581	0.556	0.605	0.578	0.663	0.559	0.625	0.164	0.636	0.559	0.471	0.634	0.578	0.646	0.517	0.797	0.685	0.741	0.772	0.603	0.387	0.659	0.622	0.636	0.706
Bronchiolitis obliterans	D001989	0.32	0.796	0.148	0.66	0.595	0.633	0.701	0.849	0.211	0.447	0.357	0.658	0.713	0.679	0.757	0.632	0.454	0.645	0.439	0.387	0.525	0.737	0.556	0.565	0.611	0.667	0.563	0.69	0.567	0.716	0.204	0.666	0.566	0.515	0.75	0.586	0.713	0.526	0.753	0.801	0.786	0.695	0.638	0.381	0.778	0.67	0.66	0.766
Bronchopulmonary dysplasia	D001997	0.291	0.674	0.159	0.645	0.588	0.574	0.757	0.678	0.21	0.426	0.362	0.611	0.68	0.69	0.682	0.623	0.432	0.57	0.431	0.359	0.51	0.74	0.581	0.583	0.535	0.684	0.543	0.684	0.557	0.711	0.19	0.652	0.538	0.505	0.66	0.581	0.696	0.529	0.716	0.798	0.728	0.754	0.669	0.384	0.772	0.67	0.643	0.772
Brucellosis	D002006	0.29	0.757	0.14	0.645	0.578	0.616	0.69	0.827	0.189	0.44	0.362	0.607	0.652	0.692	0.764	0.598	0.463	0.589	0.39	0.352	0.481	0.756	0.501	0.577	0.514	0.626	0.533	0.696	0.541	0.735	0.194	0.659	0.531	0.501	0.706	0.575	0.697	0.493	0.755	0.817	0.768	0.674	0.653	0.363	0.73	0.679	0.638	0.84
Bulimia	D002032	0.292	0.508	0.19	0.483	0.474	0.489	0.521	0.511	0.253	0.409	0.301	0.508	0.494	0.507	0.529	0.508	0.375	0.499	0.422	0.382	0.483	0.515	0.504	0.484	0.45	0.738	0.482	0.521	0.53	0.53	0.216	0.499	0.537	0.477	0.571	0.504	0.679	0.493	0.554	0.54	0.518	0.544	0.485	0.403	0.549	0.504	0.485	0.505
CNS lymphoma		0.192	1	0.108	1	0.402	0.817	0.817	1	0.163	0.317	0.27	1	0.402	0.683	1	0.817	0.268	0.527	0.263	0.222	0.251	1	1	0.292	0.279	0.488	0.334	1	0.3	0.817	0.112	1	0.428	0.268	0.817	1	0.373	0.322	0.316	0.817	0.817	0.268	0.817	0.425	0.817	1	1	0.817
CNS metastases		0.374	0.691	0.192	0.628	0.571	0.597	0.686	0.678	0.301	0.382	0.362	0.596	0.707	0.652	0.593	0.65	0.426	0.606	0.442	0.393	0.531	0.61	0.515	0.54	0.563	0.618	0.53	0.624	0.554	0.602	0.202	0.628	0.556	0.487	0.594	0.572	0.611	0.496	0.621	0.614	0.673	0.627	0.598	0.388	0.635	0.632	0.653	0.609
Neoplasms	D009369	0.3	0.576	0.175	0.674	0.635	0.54	0.606	0.601	0.215	0.388	0.369	0.545	0.626	0.633	0.584	0.645	0.422	0.538	0.397	0.349	0.476	0.77	0.517	0.49	0.477	0.612	0.51	0.679	0.53	0.703	0.175	0.806	0.487	0.442	0.559	0.546	0.633	0.488	0.563	0.635	0.681	0.547	0.861	0.412	0.651	0.697	0.774	0.705
Capillaries disease		0.285	0.663	0.149	0.775	0.631	0.61	0.653	0.654	0.21	0.462	0.424	0.608	0.676	0.705	0.625	0.644	0.439	0.561	0.472	0.374	0.496	0.677	0.622	0.513	0.562	0.654	0.594	0.706	0.604	0.662	0.188	0.645	0.553	0.467	0.657	0.586	0.662	0.583	0.642	0.688	0.686	0.629	0.634	0.46	0.753	0.633	0.683	0.676
Carcinoma	D002277	0.345	0.637	0.201	0.649	0.645	0.631	0.608	0.634	0.291	0.482	0.422	0.581	0.637	0.692	0.61	0.645	0.463	0.563	0.45	0.37	0.529	0.677	0.538	0.593	0.524	0.61	0.574	0.668	0.585	0.646	0.215	0.682	0.577	0.51	0.593	0.569	0.628	0.543	0.602	0.636	0.668	0.601	0.628	0.444	0.612	0.624	0.66	0.637
Cardiovascular disease	D002318	0.306	0.664	0.174	0.695	0.653	0.563	0.679	0.652	0.212	0.413	0.37	0.606	0.668	0.673	0.646	0.679	0.415	0.653	0.412	0.352	0.484	0.81	0.62	0.538	0.5	0.741	0.536	0.748	0.53	0.767	0.184	0.768	0.53	0.435	0.683	0.609	0.741	0.51	0.63	0.703	0.773	0.611	0.805	0.392	0.739	0.765	0.779	0.767
Celiac disease	D002446	0.313	0.699	0.158	0.658	0.631	0.636	0.754	0.74	0.203	0.429	0.339	0.642	0.678	0.7	0.713	0.654	0.473	0.598	0.409	0.363	0.529	0.804	0.526	0.595	0.509	0.669	0.517	0.734	0.551	0.783	0.186	0.756	0.519	0.531	0.633	0.578	0.75	0.487	0.772	0.802	0.788	0.687	0.765	0.361	0.726	0.755	0.725	0.846
Central nervous system disease	D002493	0.37	0.553	0.204	0.586	0.595	0.566	0.575	0.564	0.235	0.456	0.403	0.546	0.583	0.616	0.543	0.591	0.556	0.552	0.454	0.377	0.566	0.595	0.526	0.504	0.527	0.574	0.524	0.606	0.563	0.577	0.176	0.619	0.531	0.424	0.535	0.546	0.564	0.489	0.552	0.561	0.583	0.547	0.579	0.446	0.571	0.655	0.644	0.566
Cerebellar disease	D002526	0.352	0.521	0.208	0.56	0.571	0.558	0.521	0.498	0.352	0.446	0.396	0.504	0.544	0.58	0.512	0.522	0.416	0.471	0.483	0.381	0.523	0.504	0.48	0.5	0.493	0.521	0.533	0.509	0.57	0.494	0.266	0.513	0.572	0.487	0.522	0.531	0.5	0.518	0.534	0.516	0.525	0.541	0.476	0.437	0.528	0.474	0.515	0.472
Cerebral palsy	D002547	0.332	0.783	0.16	0.664	0.618	0.649	0.69	0.724	0.199	0.45	0.37	0.643	0.691	0.676	0.684	0.651	0.461	0.663	0.469	0.418	0.502	0.699	0.578	0.539	0.568	0.757	0.546	0.67	0.564	0.729	0.189	0.665	0.563	0.486	0.745	0.591	0.782	0.544	0.705	0.807	0.805	0.667	0.644	0.402	0.756	0.645	0.655	0.726
Cerebrovascular disorder	D002561	0.323	0.621	0.202	0.621	0.686	0.559	0.651	0.635	0.242	0.421	0.332	0.592	0.618	0.651	0.641	0.64	0.441	0.711	0.396	0.343	0.504	0.725	0.575	0.537	0.484	0.737	0.515	0.686	0.525	0.708	0.201	0.725	0.534	0.453	0.642	0.599	0.716	0.499	0.628	0.668	0.676	0.6	0.715	0.403	0.665	0.75	0.74	0.685
Uterine Cervical Neoplasms	D002583	0.308	0.684	0.163	0.709	0.647	0.589	0.702	0.703	0.2	0.417	0.383	0.606	0.692	0.689	0.682	0.68	0.468	0.582	0.412	0.371	0.508	0.824	0.54	0.563	0.506	0.709	0.539	0.744	0.57	0.789	0.175	0.79	0.505	0.469	0.649	0.568	0.732	0.511	0.707	0.772	0.801	0.656	0.824	0.396	0.745	0.767	0.766	0.823
Charcot-Marie-Tooth Disease	D002607	0.382	0.65	0.193	0.64	0.62	0.599	0.645	0.634	0.233	0.47	0.413	0.648	0.656	0.637	0.647	0.663	0.522	0.577	0.469	0.421	0.554	0.621	0.568	0.532	0.52	0.634	0.579	0.633	0.602	0.602	0.213	0.634	0.584	0.481	0.586	0.575	0.639	0.549	0.614	0.615	0.657	0.616	0.591	0.478	0.626	0.589	0.624	0.624
Cholangiocarcinoma	D018281	0.395	0.494	0.232	0.461	0.501	0.571	0.479	0.449	0.315	0.447	0.344	0.463	0.489	0.53	0.473	0.489	0.394	0.438	0.46	0.42	0.605	0.473	0.497	0.418	0.544	0.501	0.526	0.478	0.511	0.494	0.242	0.486	0.592	0.468	0.495	0.468	0.486	0.434	0.514	0.462	0.46	0.501	0.428	0.441	0.477	0.449	0.463	0.446
Cholangitis	D002761	0.354	0.643	0.144	0.565	0.506	0.591	0.618	0.642	0.203	0.453	0.399	0.568	0.586	0.565	0.56	0.539	0.526	0.514	0.452	0.429	0.61	0.562	0.487	0.511	0.582	0.556	0.541	0.609	0.555	0.535	0.194	0.535	0.553	0.514	0.582	0.507	0.605	0.495	0.682	0.615	0.593	0.632	0.49	0.405	0.581	0.529	0.514	0.591
Cholelithiasis	D002769	0.296	0.63	0.18	0.629	0.691	0.55	0.65	0.631	0.231	0.438	0.347	0.594	0.676	0.66	0.696	0.64	0.404	0.71	0.426	0.339	0.495	0.716	0.551	0.539	0.486	0.695	0.519	0.687	0.546	0.703	0.221	0.734	0.534	0.483	0.654	0.587	0.717	0.513	0.632	0.677	0.682	0.608	0.708	0.427	0.667	0.718	0.729	0.706
Cholestasis	D002779	0.342	0.633	0.186	0.625	0.633	0.583	0.628	0.633	0.219	0.455	0.421	0.613	0.625	0.62	0.625	0.621	0.46	0.586	0.442	0.386	0.577	0.655	0.561	0.529	0.624	0.664	0.542	0.652	0.591	0.626	0.197	0.634	0.583	0.502	0.629	0.572	0.641	0.556	0.637	0.653	0.652	0.605	0.602	0.449	0.635	0.634	0.628	0.633
Chondrosarcoma	D002813	0.315	0.588	0.165	0.633	0.577	0.553	0.588	0.58	0.234	0.418	0.438	0.572	0.609	0.602	0.607	0.565	0.486	0.506	0.49	0.421	0.528	0.57	0.534	0.476	0.558	0.579	0.595	0.587	0.6	0.584	0.204	0.559	0.6	0.523	0.604	0.522	0.601	0.556	0.571	0.594	0.61	0.59	0.524	0.514	0.615	0.542	0.557	0.574
Choriocarcinoma	D002822	0.33	0.682	0.168	0.689	0.644	0.607	0.703	0.738	0.247	0.479	0.387	0.632	0.681	0.675	0.788	0.649	0.431	0.604	0.469	0.417	0.534	0.749	0.578	0.572	0.555	0.718	0.572	0.694	0.589	0.716	0.221	0.694	0.57	0.532	0.676	0.594	0.783	0.56	0.684	0.713	0.756	0.671	0.654	0.41	0.708	0.661	0.686	0.76
Chorioretinitis	D002825	0.378	0.611	0.176	0.53	0.476	0.553	0.565	0.613	0.186	0.442	0.456	0.572	0.597	0.513	0.532	0.525	0.406	0.595	0.488	0.449	0.535	0.486	0.472	0.461	0.559	0.496	0.517	0.506	0.513	0.479	0.172	0.504	0.557	0.417	0.542	0.486	0.51	0.481	0.581	0.573	0.548	0.57	0.445	0.422	0.535	0.449	0.474	0.499
Fatigue Syndrome, Chronic	D015673	0.313	0.541	0.197	0.637	0.57	0.522	0.592	0.574	0.276	0.459	0.417	0.533	0.563	0.588	0.546	0.586	0.422	0.517	0.444	0.376	0.458	0.571	0.59	0.526	0.504	0.594	0.551	0.602	0.562	0.578	0.212	0.562	0.543	0.46	0.611	0.563	0.583	0.53	0.567	0.55	0.576	0.56	0.55	0.415	0.607	0.555	0.561	0.61
Pulmonary Disease, Chronic Obstructive	D029424	0.295	0.657	0.169	0.686	0.623	0.578	0.683	0.69	0.201	0.398	0.351	0.585	0.668	0.679	0.655	0.68	0.413	0.587	0.394	0.348	0.481	0.812	0.54	0.546	0.497	0.675	0.522	0.741	0.522	0.771	0.179	0.787	0.495	0.446	0.631	0.571	0.723	0.487	0.664	0.755	0.752	0.629	0.835	0.364	0.738	0.774	0.813	0.836
Ophthalmoplegia, Chronic Progressive External	D017246	0.453	0.257	0.305	0.242	0.365	0.395	0.248	0.264	0.359	0.318	0.234	0.276	0.242	0.309	0.253	0.311	0.38	0.291	0.284	0.264	0.405	0.285	0.293	0.296	0.307	0.3	0.306	0.267	0.323	0.312	0.246	0.301	0.371	0.355	0.259	0.357	0.265	0.297	0.276	0.259	0.26	0.27	0.28	0.316	0.257	0.282	0.302	0.245
Chronic rejection of renal transplant		0.318	0.705	0.169	0.753	0.649	0.633	0.717	0.703	0.207	0.436	0.393	0.646	0.732	0.69	0.664	0.687	0.439	0.605	0.436	0.387	0.517	0.754	0.654	0.586	0.563	0.673	0.61	0.754	0.589	0.721	0.182	0.721	0.582	0.453	0.685	0.584	0.694	0.544	0.722	0.711	0.744	0.685	0.715	0.404	0.725	0.7	0.701	0.775
Chronic simple glaucoma	D005901	0.327	0.63	0.201	0.662	0.657	0.561	0.662	0.633	0.221	0.417	0.369	0.586	0.638	0.676	0.629	0.661	0.439	0.714	0.428	0.369	0.531	0.734	0.616	0.531	0.54	0.661	0.582	0.719	0.56	0.694	0.191	0.716	0.578	0.442	0.651	0.6	0.67	0.518	0.629	0.669	0.689	0.597	0.704	0.428	0.69	0.71	0.722	0.727
Liver Cirrhosis	D008103	0.296	0.635	0.165	0.733	0.661	0.564	0.666	0.641	0.213	0.415	0.373	0.61	0.696	0.687	0.678	0.675	0.427	0.652	0.427	0.357	0.495	0.785	0.629	0.525	0.513	0.782	0.547	0.744	0.569	0.765	0.181	0.774	0.554	0.464	0.664	0.577	0.79	0.526	0.619	0.693	0.746	0.612	0.793	0.424	0.72	0.736	0.774	0.771
Adenocarcinoma, Clear Cell	D018262	0.359	0.565	0.182	0.601	0.573	0.562	0.553	0.561	0.316	0.48	0.413	0.57	0.587	0.585	0.582	0.538	0.478	0.509	0.528	0.438	0.573	0.538	0.498	0.511	0.532	0.577	0.619	0.54	0.629	0.538	0.273	0.541	0.639	0.553	0.587	0.534	0.578	0.597	0.562	0.567	0.58	0.558	0.491	0.511	0.572	0.492	0.53	0.536
Cleft palate	D002972	0.304	0.65	0.192	0.709	0.669	0.592	0.635	0.609	0.216	0.431	0.42	0.642	0.687	0.64	0.641	0.654	0.469	0.548	0.481	0.414	0.484	0.636	0.644	0.484	0.547	0.637	0.612	0.655	0.624	0.615	0.185	0.63	0.57	0.491	0.627	0.537	0.664	0.564	0.582	0.619	0.679	0.582	0.601	0.513	0.691	0.577	0.626	0.619
Cockayne syndrome	D003057	0.35	0.461	0.263	0.438	0.521	0.578	0.42	0.424	0.391	0.381	0.356	0.441	0.459	0.515	0.42	0.475	0.398	0.379	0.368	0.343	0.523	0.43	0.414	0.414	0.465	0.444	0.459	0.43	0.48	0.455	0.318	0.466	0.495	0.495	0.433	0.468	0.424	0.457	0.435	0.414	0.431	0.419	0.406	0.447	0.414	0.399	0.453	0.392
Colonic Neoplasms	D003110	0.316	0.602	0.184	0.667	0.647	0.556	0.636	0.648	0.22	0.399	0.351	0.565	0.633	0.677	0.624	0.656	0.434	0.567	0.402	0.356	0.496	0.822	0.532	0.524	0.489	0.66	0.508	0.72	0.523	0.744	0.18	0.814	0.5	0.452	0.586	0.565	0.694	0.496	0.615	0.673	0.725	0.574	0.881	0.39	0.677	0.752	0.787	0.77
Severe Combined Immunodeficiency	D016511	0.375	0.643	0.19	0.574	0.552	0.644	0.611	0.633	0.234	0.455	0.376	0.613	0.616	0.603	0.625	0.579	0.472	0.533	0.479	0.509	0.596	0.61	0.535	0.526	0.549	0.611	0.555	0.585	0.56	0.596	0.217	0.578	0.567	0.559	0.581	0.563	0.627	0.525	0.633	0.608	0.622	0.575	0.518	0.422	0.582	0.528	0.549	0.594
Common cold	D003139	0.368	0.621	0.214	0.616	0.662	0.689	0.635	0.623	0.24	0.446	0.4	0.608	0.634	0.649	0.601	0.642	0.452	0.597	0.423	0.396	0.534	0.637	0.554	0.526	0.523	0.638	0.547	0.657	0.561	0.648	0.204	0.641	0.568	0.488	0.611	0.605	0.631	0.556	0.65	0.632	0.646	0.6	0.616	0.408	0.643	0.625	0.642	0.624
Common variable immunodeficiency	D017074	0.412	0.595	0.169	0.544	0.489	0.556	0.556	0.572	0.222	0.462	0.368	0.571	0.592	0.564	0.573	0.507	0.456	0.509	0.571	0.53	0.546	0.511	0.469	0.466	0.549	0.518	0.533	0.531	0.568	0.495	0.221	0.499	0.569	0.495	0.564	0.484	0.559	0.537	0.565	0.573	0.568	0.53	0.44	0.456	0.548	0.448	0.463	0.527
Warts	D014860	0.372	0.606	0.176	0.535	0.548	0.561	0.606	0.584	0.259	0.464	0.356	0.598	0.679	0.616	0.603	0.576	0.454	0.531	0.499	0.446	0.58	0.558	0.516	0.501	0.56	0.61	0.598	0.577	0.563	0.567	0.233	0.588	0.585	0.463	0.58	0.493	0.614	0.508	0.632	0.575	0.593	0.58	0.516	0.42	0.567	0.536	0.536	0.573
Communicable disease	D003141	0.283	0.692	0.136	0.585	0.568	0.61	0.673	0.772	0.186	0.431	0.328	0.584	0.63	0.655	0.706	0.579	0.472	0.612	0.392	0.356	0.499	0.714	0.495	0.576	0.506	0.615	0.508	0.678	0.518	0.693	0.186	0.667	0.517	0.529	0.633	0.554	0.725	0.483	0.733	0.756	0.709	0.662	0.632	0.347	0.653	0.663	0.624	0.76
Conduct disorder	D019955	0.277	0.324	0.184	0.366	0.423	0.354	0.36	0.367	0.206	0.464	0.436	0.339	0.357	0.369	0.343	0.397	0.348	0.373	0.38	0.276	0.362	0.353	0.412	0.421	0.387	0.381	0.336	0.399	0.39	0.379	0.13	0.346	0.348	0.314	0.383	0.388	0.349	0.435	0.349	0.378	0.35	0.372	0.356	0.328	0.369	0.361	0.35	0.359
Congenital abnormality	D000013	0.31	0.597	0.173	0.687	0.635	0.547	0.631	0.629	0.213	0.396	0.395	0.557	0.637	0.659	0.598	0.665	0.448	0.551	0.412	0.356	0.476	0.785	0.523	0.506	0.492	0.631	0.528	0.716	0.546	0.725	0.167	0.804	0.5	0.453	0.579	0.558	0.655	0.491	0.579	0.662	0.715	0.564	0.841	0.408	0.661	0.724	0.779	0.733
Congenital heart disease		0.293	0.606	0.157	0.754	0.615	0.572	0.593	0.598	0.21	0.462	0.54	0.566	0.623	0.591	0.587	0.641	0.465	0.541	0.489	0.38	0.488	0.584	0.586	0.503	0.507	0.596	0.577	0.618	0.607	0.579	0.169	0.599	0.557	0.483	0.619	0.543	0.609	0.579	0.557	0.601	0.622	0.568	0.55	0.494	0.651	0.532	0.594	0.596
Connective tissue disease	D003240	0.329	0.628	0.197	0.667	0.613	0.583	0.629	0.623	0.283	0.437	0.42	0.606	0.673	0.654	0.621	0.65	0.434	0.552	0.453	0.394	0.504	0.64	0.599	0.532	0.573	0.637	0.599	0.667	0.583	0.642	0.225	0.619	0.582	0.465	0.646	0.582	0.639	0.567	0.594	0.625	0.661	0.585	0.598	0.432	0.656	0.604	0.612	0.669
Copper metabolism disorder		0.275	0.396	0.151	0.36	0.351	0.425	0.361	0.422	0.293	0.453	0.349	0.382	0.373	0.438	0.376	0.381	0.339	0.371	0.371	0.385	0.433	0.372	0.364	0.448	0.395	0.388	0.454	0.372	0.445	0.371	0.212	0.375	0.399	0.375	0.391	0.382	0.387	0.404	0.413	0.392	0.361	0.391	0.344	0.283	0.36	0.374	0.357	0.385
Corneal disease	D003316	0.392	0.517	0.223	0.536	0.545	0.527	0.491	0.452	0.339	0.414	0.399	0.528	0.543	0.525	0.497	0.526	0.412	0.431	0.472	0.415	0.531	0.465	0.492	0.437	0.49	0.518	0.536	0.487	0.563	0.463	0.267	0.496	0.572	0.492	0.504	0.455	0.502	0.541	0.473	0.477	0.504	0.461	0.445	0.526	0.509	0.436	0.473	0.445
Coronavirus infection	D018352	0.276	0.365	0.24	0.328	0.356	0.371	0.38	0.378	0.214	0.341	0.332	0.371	0.328	0.376	0.357	0.364	0.388	0.38	0.386	0.323	0.332	0.372	0.478	0.377	0.365	0.373	0.387	0.391	0.346	0.397	0.178	0.35	0.384	0.317	0.41	0.388	0.357	0.369	0.357	0.367	0.362	0.366	0.353	0.295	0.357	0.352	0.345	0.379
Craniosynostosis	D003398	0.276	0.616	0.149	0.695	0.624	0.586	0.612	0.609	0.217	0.451	0.451	0.588	0.647	0.613	0.604	0.605	0.437	0.517	0.503	0.409	0.477	0.585	0.557	0.476	0.542	0.637	0.606	0.616	0.619	0.573	0.19	0.587	0.566	0.536	0.602	0.504	0.66	0.58	0.583	0.61	0.623	0.595	0.541	0.521	0.646	0.538	0.58	0.6
Creutzfeldt-Jakob syndrome	D007562	0.387	0.532	0.167	0.476	0.457	0.542	0.547	0.534	0.211	0.391	0.359	0.515	0.549	0.521	0.478	0.517	0.462	0.521	0.479	0.445	0.481	0.484	0.492	0.467	0.571	0.506	0.501	0.546	0.454	0.494	0.149	0.479	0.534	0.37	0.52	0.513	0.497	0.511	0.523	0.489	0.526	0.525	0.463	0.337	0.516	0.464	0.473	0.496
Cushing syndrome	D003480	0.33	0.792	0.157	0.635	0.589	0.635	0.695	0.724	0.187	0.474	0.36	0.62	0.677	0.63	0.688	0.605	0.435	0.678	0.486	0.392	0.477	0.672	0.569	0.523	0.584	0.668	0.54	0.666	0.545	0.709	0.186	0.614	0.6	0.501	0.808	0.568	0.698	0.534	0.704	0.81	0.745	0.665	0.595	0.411	0.746	0.602	0.597	0.712
Histiocytoma, Benign Fibrous	D018219	0.384	0.259	0.254	0.335	0.32	0.315	0.263	0.238	0.369	0.238	0.366	0.283	0.295	0.285	0.25	0.324	0.3	0.244	0.271	0.361	0.29	0.258	0.285	0.201	0.338	0.256	0.273	0.285	0.331	0.251	0.184	0.273	0.292	0.269	0.244	0.27	0.255	0.305	0.221	0.248	0.268	0.246	0.264	0.321	0.281	0.247	0.285	0.239
Cystic fibrosis	D003550	0.308	0.684	0.171	0.688	0.637	0.578	0.738	0.725	0.213	0.429	0.356	0.605	0.686	0.691	0.666	0.684	0.45	0.615	0.399	0.351	0.514	0.798	0.546	0.574	0.518	0.662	0.528	0.757	0.568	0.761	0.19	0.769	0.546	0.477	0.618	0.604	0.705	0.507	0.713	0.82	0.76	0.704	0.798	0.39	0.747	0.751	0.753	0.806
Cystitis	D003556	0.216	0.211	0.142	0.166	0.166	0.235	0.197	0.206	0.075	0.237	0.214	0.226	0.182	0.178	0.186	0.199	0.231	0.202	0.208	0.251	0.203	0.175	0.176	0.171	0.223	0.177	0.167	0.179	0.16	0.17	0.069	0.172	0.172	0.139	0.175	0.209	0.162	0.176	0.183	0.186	0.189	0.216	0.173	0.154	0.166	0.178	0.174	0.177
Cytomegalovirus infection	D003586	0.321	0.689	0.171	0.651	0.601	0.614	0.699	0.725	0.221	0.445	0.35	0.605	0.719	0.678	0.647	0.657	0.446	0.574	0.416	0.383	0.507	0.725	0.536	0.574	0.547	0.654	0.561	0.722	0.565	0.683	0.201	0.7	0.569	0.51	0.627	0.593	0.703	0.494	0.71	0.719	0.704	0.664	0.658	0.418	0.678	0.689	0.663	0.725
Deafness	D003638	0.319	0.615	0.176	0.689	0.638	0.572	0.645	0.633	0.202	0.453	0.453	0.592	0.676	0.652	0.605	0.701	0.456	0.574	0.443	0.378	0.536	0.688	0.576	0.56	0.528	0.653	0.581	0.715	0.597	0.693	0.161	0.709	0.547	0.482	0.602	0.599	0.66	0.545	0.603	0.654	0.705	0.601	0.667	0.464	0.666	0.647	0.693	0.691
Intervertebral Disc Degeneration	D055959	0.492	0.452	0.312	0.443	0.452	0.499	0.455	0.415	0.297	0.38	0.374	0.505	0.483	0.475	0.45	0.495	0.424	0.427	0.516	0.491	0.495	0.415	0.456	0.355	0.552	0.445	0.461	0.433	0.477	0.422	0.17	0.418	0.476	0.385	0.423	0.437	0.426	0.478	0.409	0.414	0.452	0.431	0.408	0.411	0.454	0.393	0.42	0.39
Demyelinating disease	D003711	0.439	0.479	0.189	0.436	0.419	0.476	0.462	0.404	0.232	0.338	0.352	0.539	0.508	0.445	0.501	0.483	0.417	0.405	0.45	0.523	0.463	0.409	0.388	0.382	0.458	0.423	0.42	0.424	0.475	0.402	0.135	0.416	0.463	0.426	0.393	0.413	0.441	0.441	0.411	0.408	0.474	0.42	0.393	0.383	0.434	0.381	0.41	0.407
Dental enamel hypoplasia	D003744	0.337	0.547	0.167	0.57	0.502	0.496	0.533	0.48	0.214	0.422	0.479	0.583	0.578	0.55	0.53	0.577	0.467	0.499	0.528	0.409	0.485	0.492	0.498	0.423	0.528	0.533	0.562	0.538	0.598	0.48	0.157	0.502	0.547	0.437	0.528	0.467	0.523	0.536	0.468	0.482	0.606	0.523	0.468	0.485	0.55	0.463	0.505	0.478
Dental plaque	D003773	0.297	0.665	0.162	0.687	0.628	0.56	0.706	0.67	0.205	0.41	0.348	0.604	0.663	0.679	0.675	0.659	0.447	0.647	0.393	0.347	0.491	0.824	0.536	0.541	0.484	0.705	0.503	0.729	0.541	0.781	0.182	0.809	0.499	0.444	0.641	0.58	0.728	0.484	0.661	0.761	0.752	0.639	0.857	0.375	0.735	0.794	0.801	0.802
Depression	D003863	0.322	0.64	0.169	0.693	0.657	0.559	0.683	0.669	0.216	0.424	0.367	0.598	0.68	0.656	0.638	0.674	0.417	0.67	0.43	0.352	0.492	0.787	0.577	0.548	0.498	0.687	0.52	0.743	0.54	0.733	0.183	0.781	0.535	0.432	0.641	0.581	0.689	0.503	0.631	0.679	0.739	0.612	0.814	0.402	0.688	0.773	0.799	0.745
Dermatitis	D003872	0.3	0.663	0.157	0.697	0.628	0.567	0.687	0.703	0.196	0.413	0.344	0.589	0.665	0.68	0.666	0.659	0.441	0.625	0.407	0.355	0.492	0.847	0.535	0.542	0.506	0.656	0.524	0.747	0.541	0.762	0.177	0.803	0.51	0.459	0.636	0.57	0.706	0.492	0.694	0.75	0.763	0.636	0.858	0.383	0.727	0.774	0.818	0.835
Diabetes insipidus	D003919	0.403	0.414	0.229	0.343	0.366	0.42	0.395	0.395	0.297	0.449	0.341	0.406	0.384	0.433	0.392	0.398	0.365	0.412	0.48	0.432	0.469	0.373	0.406	0.369	0.393	0.435	0.457	0.398	0.405	0.375	0.279	0.384	0.433	0.358	0.413	0.375	0.402	0.408	0.409	0.39	0.383	0.407	0.351	0.355	0.39	0.363	0.368	0.377
Diabetes mellitus	D003920	0.298	0.591	0.178	0.679	0.626	0.535	0.626	0.625	0.207	0.388	0.358	0.551	0.626	0.652	0.606	0.644	0.418	0.57	0.398	0.349	0.472	0.79	0.525	0.504	0.479	0.636	0.506	0.708	0.517	0.728	0.177	0.803	0.485	0.441	0.583	0.549	0.656	0.485	0.594	0.656	0.705	0.563	0.875	0.394	0.67	0.738	0.797	0.752
Disseminated cancer		0.439	0.57	0.22	0.564	0.524	0.558	0.566	0.543	0.271	0.427	0.428	0.581	0.592	0.573	0.541	0.597	0.45	0.513	0.46	0.417	0.562	0.524	0.512	0.446	0.608	0.541	0.543	0.547	0.53	0.51	0.185	0.524	0.54	0.457	0.536	0.506	0.557	0.509	0.537	0.531	0.551	0.57	0.494	0.433	0.56	0.496	0.524	0.515
Disseminated intravascular coagulation	D004211	0.276	0.451	0.18	0.429	0.41	0.446	0.42	0.455	0.262	0.41	0.332	0.436	0.436	0.455	0.437	0.45	0.364	0.456	0.323	0.311	0.401	0.43	0.445	0.406	0.478	0.441	0.469	0.433	0.409	0.427	0.222	0.402	0.498	0.364	0.458	0.501	0.443	0.381	0.444	0.432	0.411	0.453	0.391	0.328	0.449	0.423	0.405	0.445
Down syndrome	D004314	0.311	0.659	0.181	0.68	0.674	0.582	0.678	0.668	0.208	0.43	0.363	0.576	0.657	0.673	0.656	0.664	0.457	0.641	0.411	0.356	0.499	0.802	0.557	0.53	0.501	0.66	0.509	0.729	0.532	0.756	0.181	0.8	0.509	0.456	0.644	0.579	0.698	0.496	0.668	0.709	0.748	0.611	0.835	0.404	0.704	0.794	0.82	0.795
Substance-Related Disorders	D019966	0.306	0.618	0.172	0.701	0.644	0.555	0.671	0.644	0.203	0.427	0.374	0.572	0.669	0.669	0.632	0.666	0.434	0.624	0.418	0.342	0.474	0.805	0.536	0.541	0.486	0.651	0.527	0.715	0.546	0.744	0.18	0.813	0.511	0.448	0.599	0.573	0.671	0.496	0.619	0.705	0.731	0.613	0.842	0.401	0.701	0.761	0.803	0.75
Drug-Induced dyskinesia	D004409	0.321	0.509	0.237	0.557	0.606	0.499	0.556	0.532	0.232	0.42	0.344	0.506	0.534	0.583	0.517	0.616	0.395	0.756	0.416	0.344	0.507	0.567	0.547	0.488	0.465	0.612	0.533	0.597	0.512	0.583	0.205	0.582	0.528	0.442	0.594	0.538	0.572	0.47	0.531	0.543	0.553	0.535	0.561	0.412	0.595	0.597	0.637	0.549
Duane retraction syndrome	D004370	0.324	0.479	0.198	0.503	0.475	0.501	0.44	0.414	0.313	0.405	0.411	0.472	0.494	0.474	0.462	0.429	0.386	0.393	0.471	0.395	0.473	0.418	0.441	0.39	0.459	0.447	0.509	0.447	0.524	0.41	0.29	0.426	0.538	0.488	0.478	0.397	0.442	0.516	0.436	0.445	0.451	0.44	0.386	0.519	0.461	0.377	0.421	0.392
Binge-Eating Disorder	D056912	0.329	0.673	0.172	0.719	0.653	0.582	0.708	0.69	0.224	0.459	0.38	0.635	0.698	0.706	0.699	0.703	0.455	0.635	0.433	0.379	0.532	0.778	0.553	0.58	0.535	0.732	0.6	0.727	0.588	0.774	0.192	0.796	0.568	0.477	0.644	0.583	0.748	0.531	0.668	0.738	0.754	0.654	0.77	0.406	0.715	0.734	0.772	0.786
Ectodermal dysplasia	D004476	0.335	0.613	0.191	0.569	0.543	0.573	0.592	0.6	0.299	0.469	0.381	0.582	0.591	0.596	0.569	0.568	0.494	0.515	0.499	0.419	0.54	0.549	0.525	0.519	0.58	0.575	0.578	0.581	0.608	0.536	0.226	0.536	0.59	0.56	0.572	0.553	0.622	0.531	0.595	0.591	0.596	0.553	0.506	0.473	0.582	0.516	0.526	0.557
Carcinoma, Embryonal	D018236	0.307	0.606	0.181	0.667	0.627	0.55	0.636	0.649	0.215	0.393	0.343	0.556	0.625	0.675	0.62	0.648	0.423	0.578	0.394	0.35	0.486	0.818	0.538	0.513	0.479	0.658	0.502	0.728	0.524	0.75	0.178	0.798	0.489	0.441	0.59	0.561	0.685	0.475	0.614	0.68	0.723	0.574	0.886	0.383	0.675	0.764	0.805	0.783
Emphysema	D004646	0.324	0.66	0.175	0.71	0.66	0.613	0.677	0.7	0.223	0.436	0.403	0.627	0.712	0.702	0.694	0.69	0.466	0.579	0.455	0.394	0.547	0.751	0.562	0.544	0.562	0.665	0.617	0.71	0.603	0.696	0.188	0.75	0.581	0.507	0.619	0.583	0.709	0.551	0.654	0.693	0.745	0.627	0.702	0.434	0.702	0.681	0.737	0.729
Encephalitis	D004660	0.323	0.694	0.162	0.656	0.602	0.593	0.687	0.699	0.181	0.432	0.383	0.595	0.662	0.664	0.654	0.643	0.471	0.739	0.433	0.382	0.527	0.713	0.53	0.547	0.526	0.629	0.54	0.71	0.543	0.674	0.169	0.706	0.524	0.462	0.652	0.593	0.659	0.495	0.706	0.697	0.71	0.716	0.681	0.414	0.674	0.72	0.721	0.717
Encephalopathies	D001927	0.32	0.556	0.253	0.624	0.668	0.527	0.569	0.594	0.228	0.377	0.351	0.54	0.584	0.631	0.572	0.635	0.409	0.674	0.397	0.341	0.469	0.669	0.574	0.467	0.486	0.63	0.502	0.651	0.504	0.653	0.175	0.675	0.476	0.426	0.573	0.568	0.615	0.505	0.542	0.584	0.627	0.519	0.681	0.411	0.612	0.653	0.707	0.617
Goiter, Endemic	D006043	0.326	0.509	0.177	0.483	0.486	0.51	0.515	0.525	0.243	0.532	0.386	0.505	0.496	0.631	0.507	0.495	0.381	0.483	0.497	0.372	0.457	0.495	0.533	0.52	0.47	0.561	0.599	0.511	0.524	0.517	0.246	0.49	0.557	0.404	0.563	0.501	0.533	0.542	0.54	0.501	0.488	0.545	0.453	0.401	0.581	0.469	0.468	0.498
Endocrine system disease	D004700	0.336	0.595	0.185	0.656	0.639	0.619	0.577	0.587	0.26	0.504	0.485	0.589	0.647	0.657	0.586	0.641	0.436	0.518	0.464	0.401	0.544	0.614	0.553	0.581	0.534	0.746	0.616	0.62	0.611	0.639	0.224	0.632	0.58	0.498	0.583	0.55	0.726	0.583	0.606	0.605	0.692	0.599	0.583	0.427	0.637	0.565	0.609	0.598
Endometrial Neoplasms	D016889	0.311	0.69	0.163	0.696	0.645	0.609	0.69	0.689	0.216	0.429	0.362	0.611	0.662	0.682	0.661	0.662	0.447	0.604	0.444	0.37	0.521	0.801	0.565	0.574	0.526	0.741	0.536	0.721	0.573	0.757	0.181	0.735	0.555	0.51	0.698	0.601	0.75	0.531	0.67	0.738	0.76	0.644	0.756	0.404	0.743	0.717	0.719	0.773
Endometriosis	D004715	0.295	0.644	0.163	0.7	0.649	0.567	0.679	0.665	0.203	0.395	0.36	0.594	0.68	0.679	0.652	0.663	0.425	0.571	0.404	0.359	0.483	0.831	0.533	0.524	0.495	0.671	0.527	0.723	0.542	0.754	0.173	0.813	0.506	0.468	0.62	0.559	0.714	0.501	0.647	0.721	0.763	0.614	0.878	0.401	0.716	0.741	0.797	0.808
Endometrial Neoplasms	D016889	0.339	0.588	0.206	0.659	0.639	0.565	0.615	0.624	0.24	0.474	0.413	0.572	0.604	0.656	0.619	0.636	0.455	0.566	0.483	0.388	0.537	0.627	0.549	0.519	0.541	0.645	0.585	0.657	0.585	0.63	0.196	0.618	0.588	0.523	0.679	0.57	0.649	0.55	0.599	0.632	0.643	0.622	0.595	0.488	0.671	0.601	0.621	0.627
Enteritis	D004751	0.298	0.695	0.155	0.683	0.644	0.59	0.693	0.761	0.194	0.417	0.341	0.608	0.674	0.696	0.689	0.659	0.447	0.622	0.401	0.355	0.489	0.846	0.545	0.565	0.518	0.656	0.521	0.759	0.536	0.774	0.178	0.788	0.511	0.483	0.648	0.572	0.707	0.5	0.735	0.797	0.785	0.635	0.829	0.37	0.721	0.784	0.773	0.852
Eosinophilia	D004802	0.384	0.667	0.178	0.637	0.616	0.67	0.639	0.644	0.294	0.475	0.388	0.621	0.673	0.677	0.612	0.643	0.448	0.564	0.482	0.467	0.593	0.629	0.543	0.572	0.567	0.621	0.62	0.616	0.63	0.608	0.252	0.635	0.588	0.541	0.615	0.571	0.631	0.546	0.666	0.653	0.649	0.632	0.583	0.44	0.629	0.601	0.621	0.608
Ependymoma	D004806	0.294	0.168	0.173	0.164	0.198	0.184	0.197	0.156	0.129	0.197	0.348	0.202	0.179	0.184	0.163	0.206	0.238	0.175	0.194	0.198	0.229	0.173	0.221	0.197	0.17	0.17	0.196	0.191	0.192	0.177	0.099	0.185	0.193	0.156	0.185	0.226	0.164	0.192	0.154	0.15	0.174	0.175	0.178	0.196	0.18	0.173	0.189	0.159
Epidermolysis bullosa	D004820	0.303	0.243	0.18	0.251	0.258	0.245	0.238	0.21	0.154	0.209	0.327	0.308	0.256	0.233	0.236	0.272	0.328	0.245	0.231	0.235	0.332	0.227	0.222	0.22	0.218	0.227	0.245	0.238	0.289	0.214	0.116	0.242	0.246	0.221	0.212	0.27	0.224	0.239	0.219	0.21	0.241	0.228	0.23	0.282	0.222	0.22	0.248	0.213
Epilepsy	D004827	0.316	0.576	0.185	0.684	0.641	0.555	0.666	0.62	0.233	0.465	0.399	0.529	0.62	0.694	0.615	0.648	0.457	0.59	0.424	0.337	0.473	0.725	0.539	0.551	0.492	0.631	0.523	0.703	0.546	0.698	0.178	0.73	0.489	0.432	0.594	0.559	0.637	0.514	0.605	0.685	0.681	0.643	0.731	0.412	0.688	0.699	0.732	0.69
Epstein-Barr virus infection	D020031	0.329	0.725	0.159	0.679	0.614	0.607	0.783	0.749	0.209	0.444	0.366	0.615	0.713	0.682	0.69	0.65	0.479	0.609	0.425	0.372	0.537	0.773	0.517	0.588	0.532	0.652	0.544	0.707	0.59	0.732	0.182	0.748	0.553	0.507	0.644	0.604	0.71	0.497	0.747	0.823	0.75	0.737	0.715	0.397	0.748	0.706	0.702	0.773
Esophageal disease	D004935	0.365	0.604	0.247	0.585	0.586	0.653	0.574	0.572	0.28	0.433	0.378	0.567	0.63	0.579	0.565	0.591	0.375	0.526	0.495	0.472	0.526	0.528	0.547	0.44	0.545	0.572	0.592	0.555	0.546	0.549	0.246	0.537	0.553	0.49	0.619	0.525	0.564	0.533	0.583	0.556	0.57	0.582	0.489	0.471	0.586	0.491	0.533	0.53
Esophageal Neoplasms	D004938	0.334	0.641	0.194	0.609	0.612	0.64	0.652	0.728	0.26	0.432	0.371	0.569	0.637	0.706	0.582	0.626	0.461	0.544	0.426	0.367	0.54	0.64	0.52	0.528	0.57	0.591	0.528	0.648	0.521	0.649	0.205	0.641	0.526	0.498	0.583	0.58	0.62	0.511	0.64	0.639	0.651	0.593	0.6	0.394	0.611	0.603	0.616	0.679
Esophagitis	D004941	0.315	0.815	0.163	0.653	0.6	0.631	0.796	0.733	0.207	0.446	0.366	0.645	0.699	0.647	0.703	0.637	0.431	0.623	0.433	0.372	0.503	0.698	0.543	0.553	0.543	0.663	0.545	0.665	0.558	0.697	0.21	0.644	0.54	0.506	0.756	0.579	0.697	0.515	0.764	0.822	0.763	0.819	0.631	0.399	0.807	0.654	0.637	0.739
Esophageal Neoplasms	D004938	0.324	0.67	0.176	0.699	0.652	0.586	0.7	0.694	0.232	0.409	0.372	0.619	0.7	0.728	0.658	0.687	0.445	0.606	0.419	0.372	0.514	0.785	0.552	0.549	0.522	0.741	0.54	0.747	0.553	0.741	0.189	0.776	0.548	0.467	0.641	0.602	0.761	0.518	0.653	0.703	0.778	0.631	0.793	0.399	0.709	0.746	0.773	0.769
Esotropia	D004948	0.328	0.649	0.174	0.673	0.654	0.587	0.673	0.644	0.22	0.471	0.397	0.626	0.74	0.701	0.662	0.682	0.425	0.611	0.48	0.394	0.54	0.72	0.658	0.562	0.551	0.753	0.575	0.734	0.577	0.724	0.202	0.71	0.55	0.462	0.697	0.592	0.75	0.559	0.649	0.673	0.743	0.657	0.678	0.413	0.708	0.672	0.683	0.703
Sarcoma, Ewing	D012512	0.363	0.602	0.216	0.588	0.615	0.748	0.56	0.573	0.296	0.421	0.368	0.591	0.623	0.639	0.578	0.611	0.466	0.501	0.456	0.401	0.559	0.576	0.543	0.488	0.55	0.599	0.574	0.601	0.55	0.587	0.232	0.592	0.569	0.606	0.574	0.54	0.602	0.531	0.567	0.571	0.597	0.562	0.549	0.459	0.59	0.546	0.609	0.561
Paget Disease, Extramammary	D010145	0.318	0.182	0.227	0.172	0.215	0.218	0.192	0.159	0.294	0.162	0.208	0.205	0.194	0.217	0.18	0.222	0.236	0.189	0.198	0.268	0.26	0.185	0.21	0.161	0.244	0.182	0.222	0.194	0.199	0.192	0.216	0.199	0.23	0.163	0.172	0.212	0.172	0.193	0.167	0.17	0.175	0.188	0.192	0.187	0.179	0.185	0.205	0.17
Eye Neoplasms	D005134	0.331	0.494	0.16	0.486	0.519	0.494	0.495	0.505	0.265	0.45	0.401	0.484	0.51	0.522	0.504	0.486	0.423	0.459	0.428	0.345	0.53	0.497	0.397	0.537	0.44	0.513	0.532	0.467	0.524	0.49	0.239	0.542	0.57	0.465	0.498	0.492	0.514	0.437	0.513	0.507	0.497	0.498	0.463	0.396	0.486	0.488	0.49	0.482
Eye diseases	D005128	0.333	0.566	0.198	0.601	0.616	0.57	0.563	0.562	0.242	0.417	0.419	0.551	0.596	0.616	0.555	0.625	0.475	0.537	0.47	0.393	0.546	0.582	0.529	0.546	0.527	0.596	0.552	0.61	0.606	0.581	0.191	0.617	0.56	0.489	0.573	0.574	0.592	0.542	0.537	0.557	0.608	0.553	0.576	0.526	0.586	0.575	0.598	0.563
Familial Mediterranean fever	D010505	0.298	0.708	0.149	0.711	0.625	0.61	0.722	0.749	0.193	0.446	0.379	0.627	0.704	0.68	0.754	0.663	0.451	0.612	0.429	0.374	0.513	0.767	0.578	0.558	0.547	0.657	0.55	0.739	0.558	0.739	0.179	0.716	0.525	0.476	0.677	0.586	0.757	0.54	0.791	0.783	0.77	0.728	0.732	0.397	0.731	0.749	0.708	0.871
Fanconi's anemia	D005199	0.33	0.617	0.179	0.649	0.665	0.639	0.639	0.676	0.253	0.418	0.358	0.561	0.64	0.673	0.64	0.633	0.465	0.535	0.414	0.357	0.529	0.751	0.517	0.556	0.519	0.651	0.535	0.675	0.586	0.705	0.209	0.751	0.526	0.519	0.568	0.58	0.678	0.506	0.719	0.676	0.706	0.616	0.696	0.404	0.659	0.695	0.704	0.722
Fatty liver	D005234	0.299	0.633	0.197	0.635	0.645	0.559	0.662	0.646	0.231	0.421	0.337	0.607	0.631	0.637	0.727	0.623	0.426	0.626	0.411	0.369	0.523	0.718	0.584	0.531	0.51	0.756	0.52	0.66	0.554	0.717	0.199	0.676	0.539	0.484	0.653	0.581	0.799	0.51	0.663	0.73	0.678	0.623	0.673	0.401	0.68	0.677	0.665	0.757
Female reproductive cancer		0.359	0.47	0.236	0.473	0.523	0.584	0.448	0.472	0.315	0.399	0.356	0.461	0.502	0.558	0.481	0.504	0.446	0.475	0.466	0.368	0.489	0.48	0.445	0.436	0.477	0.474	0.483	0.475	0.524	0.508	0.21	0.503	0.476	0.48	0.474	0.502	0.479	0.465	0.442	0.463	0.471	0.44	0.45	0.404	0.456	0.435	0.484	0.45
Female reproductive system disorder		0.293	0.533	0.169	0.504	0.482	0.489	0.525	0.526	0.216	0.437	0.392	0.499	0.509	0.493	0.661	0.494	0.408	0.494	0.45	0.392	0.437	0.495	0.49	0.462	0.446	0.544	0.461	0.501	0.497	0.503	0.185	0.469	0.454	0.53	0.524	0.466	0.646	0.474	0.51	0.543	0.526	0.557	0.46	0.399	0.531	0.439	0.46	0.554
Fetal diseases	D005315	0.378	0.621	0.169	0.549	0.524	0.569	0.648	0.616	0.21	0.46	0.397	0.572	0.612	0.576	0.571	0.541	0.442	0.535	0.46	0.446	0.496	0.549	0.476	0.548	0.549	0.525	0.556	0.559	0.522	0.556	0.176	0.544	0.573	0.503	0.595	0.544	0.559	0.519	0.608	0.599	0.585	0.603	0.504	0.367	0.582	0.51	0.513	0.577
Fibroadenoma	D018226	0.346	0.517	0.187	0.562	0.53	0.523	0.517	0.501	0.28	0.443	0.419	0.521	0.538	0.542	0.535	0.493	0.408	0.473	0.524	0.458	0.505	0.49	0.488	0.443	0.523	0.541	0.589	0.506	0.587	0.487	0.247	0.486	0.616	0.502	0.562	0.464	0.533	0.577	0.507	0.522	0.524	0.533	0.446	0.498	0.543	0.451	0.485	0.478
Leiomyoma	D007889	0.353	0.625	0.18	0.656	0.627	0.593	0.632	0.597	0.24	0.48	0.422	0.638	0.664	0.66	0.633	0.654	0.448	0.546	0.474	0.404	0.558	0.662	0.609	0.556	0.56	0.756	0.58	0.664	0.592	0.649	0.201	0.651	0.571	0.459	0.631	0.576	0.731	0.591	0.602	0.62	0.721	0.606	0.623	0.412	0.651	0.613	0.632	0.655
Fibromyalgia	D005356	0.341	0.68	0.173	0.677	0.617	0.632	0.661	0.69	0.215	0.476	0.385	0.629	0.675	0.674	0.666	0.639	0.47	0.658	0.475	0.413	0.516	0.678	0.556	0.545	0.549	0.766	0.579	0.642	0.607	0.698	0.193	0.657	0.581	0.494	0.636	0.579	0.753	0.555	0.695	0.751	0.753	0.646	0.627	0.419	0.69	0.625	0.647	0.698
Fibrosarcoma	D005354	0.33	0.303	0.2	0.285	0.308	0.322	0.315	0.347	0.203	0.412	0.34	0.324	0.297	0.325	0.312	0.335	0.362	0.338	0.358	0.322	0.349	0.315	0.341	0.352	0.419	0.294	0.315	0.325	0.314	0.323	0.155	0.302	0.326	0.298	0.31	0.39	0.273	0.362	0.309	0.316	0.3	0.32	0.311	0.332	0.291	0.328	0.306	0.319
Filariasis	D005368	0.365	0.588	0.178	0.502	0.495	0.547	0.571	0.593	0.243	0.496	0.378	0.571	0.554	0.657	0.583	0.517	0.437	0.568	0.507	0.392	0.477	0.531	0.56	0.53	0.465	0.587	0.57	0.543	0.514	0.555	0.243	0.497	0.556	0.45	0.615	0.548	0.587	0.538	0.583	0.572	0.563	0.575	0.474	0.393	0.62	0.487	0.49	0.555
Folic acid deficiency	D005494	0.338	0.586	0.252	0.595	0.646	0.581	0.558	0.56	0.254	0.46	0.416	0.608	0.586	0.627	0.589	0.598	0.429	0.502	0.47	0.429	0.526	0.591	0.675	0.491	0.529	0.754	0.58	0.58	0.57	0.599	0.238	0.573	0.556	0.472	0.582	0.543	0.713	0.586	0.562	0.577	0.662	0.564	0.55	0.469	0.613	0.528	0.56	0.564
Gallbaldder cancer		0.417	0.583	0.234	0.552	0.553	0.571	0.569	0.566	0.292	0.496	0.405	0.561	0.568	0.591	0.561	0.563	0.444	0.487	0.461	0.42	0.584	0.56	0.512	0.533	0.574	0.561	0.611	0.55	0.557	0.55	0.222	0.562	0.605	0.478	0.569	0.527	0.55	0.49	0.58	0.559	0.557	0.554	0.503	0.402	0.556	0.522	0.533	0.54
Gallbladder disease		0.352	0.526	0.188	0.497	0.573	0.527	0.543	0.531	0.216	0.433	0.38	0.512	0.519	0.55	0.531	0.554	0.456	0.603	0.421	0.362	0.557	0.583	0.52	0.493	0.502	0.565	0.494	0.55	0.536	0.552	0.165	0.61	0.502	0.397	0.546	0.564	0.543	0.482	0.577	0.533	0.523	0.535	0.545	0.39	0.519	0.61	0.556	0.534
Gastritis	D005756	0.301	0.689	0.156	0.7	0.659	0.615	0.712	0.71	0.203	0.429	0.375	0.643	0.715	0.739	0.691	0.666	0.481	0.591	0.425	0.378	0.523	0.773	0.558	0.564	0.528	0.677	0.569	0.746	0.591	0.767	0.183	0.754	0.551	0.506	0.653	0.607	0.766	0.523	0.686	0.741	0.763	0.644	0.73	0.407	0.754	0.721	0.726	0.8
Gastrointestinal Neoplasms	D005770	0.32	0.533	0.191	0.501	0.496	0.504	0.498	0.505	0.345	0.398	0.386	0.501	0.504	0.507	0.532	0.456	0.363	0.421	0.395	0.388	0.458	0.47	0.438	0.436	0.448	0.501	0.505	0.461	0.499	0.47	0.348	0.464	0.524	0.501	0.528	0.447	0.484	0.487	0.505	0.561	0.497	0.499	0.421	0.428	0.491	0.438	0.45	0.476
Gastroenteritis	D005759	0.224	0.251	0.127	0.182	0.168	0.242	0.235	0.224	0.099	0.179	0.177	0.249	0.239	0.197	0.223	0.211	0.191	0.204	0.203	0.272	0.195	0.189	0.172	0.176	0.205	0.187	0.249	0.192	0.175	0.187	0.113	0.191	0.205	0.153	0.201	0.186	0.19	0.212	0.248	0.204	0.21	0.25	0.183	0.149	0.187	0.187	0.181	0.203
Gastrointestinal stromal tumors	D046152	0.323	0.622	0.186	0.646	0.62	0.569	0.598	0.574	0.226	0.465	0.444	0.627	0.642	0.65	0.615	0.645	0.464	0.545	0.505	0.42	0.53	0.601	0.57	0.5	0.538	0.758	0.594	0.612	0.639	0.609	0.206	0.603	0.567	0.487	0.616	0.546	0.736	0.589	0.581	0.598	0.754	0.612	0.573	0.471	0.643	0.554	0.599	0.587
Gastrointestinal Neoplasms	D005770	0.345	0.663	0.179	0.641	0.62	0.606	0.661	0.642	0.252	0.455	0.433	0.679	0.746	0.66	0.679	0.69	0.459	0.57	0.446	0.418	0.56	0.654	0.547	0.549	0.542	0.659	0.606	0.661	0.577	0.651	0.219	0.662	0.55	0.513	0.64	0.568	0.665	0.565	0.655	0.685	0.692	0.632	0.604	0.437	0.641	0.619	0.632	0.663
Generalized anxiety disorder	D001008	0.316	0.745	0.172	0.646	0.588	0.62	0.672	0.689	0.213	0.439	0.325	0.617	0.643	0.654	0.668	0.619	0.452	0.617	0.434	0.386	0.508	0.701	0.544	0.614	0.548	0.769	0.536	0.659	0.586	0.711	0.2	0.645	0.563	0.602	0.741	0.583	0.793	0.531	0.715	0.757	0.755	0.652	0.631	0.396	0.731	0.641	0.625	0.72
Germ cell tumor	D009373	0.329	0.347	0.242	0.405	0.439	0.443	0.33	0.321	0.392	0.332	0.363	0.368	0.381	0.393	0.371	0.366	0.321	0.309	0.406	0.42	0.378	0.347	0.37	0.33	0.373	0.372	0.401	0.347	0.437	0.364	0.378	0.362	0.459	0.391	0.367	0.354	0.356	0.469	0.324	0.362	0.35	0.34	0.338	0.431	0.37	0.308	0.366	0.328
Diabetes, Gestational	D016640	0.327	0.611	0.186	0.616	0.584	0.582	0.582	0.6	0.239	0.479	0.394	0.564	0.614	0.617	0.572	0.632	0.406	0.598	0.467	0.435	0.509	0.57	0.561	0.48	0.577	0.609	0.593	0.595	0.578	0.569	0.217	0.582	0.568	0.455	0.611	0.545	0.609	0.544	0.578	0.574	0.589	0.577	0.538	0.436	0.613	0.568	0.583	0.598
Gestational Trophoblastic Disease	D031901	0.373	0.332	0.338	0.281	0.34	0.375	0.339	0.313	0.33	0.302	0.209	0.307	0.319	0.375	0.307	0.344	0.244	0.345	0.461	0.455	0.379	0.319	0.35	0.297	0.359	0.358	0.38	0.326	0.34	0.332	0.249	0.333	0.383	0.369	0.384	0.328	0.34	0.332	0.337	0.32	0.313	0.33	0.304	0.31	0.335	0.304	0.311	0.294
Gigantism	D005877	0.357	0.301	0.26	0.252	0.296	0.31	0.294	0.28	0.313	0.222	0.263	0.282	0.277	0.301	0.274	0.3	0.308	0.264	0.278	0.437	0.325	0.278	0.274	0.277	0.299	0.286	0.288	0.267	0.312	0.27	0.216	0.294	0.335	0.289	0.293	0.295	0.273	0.259	0.292	0.273	0.273	0.286	0.275	0.262	0.267	0.281	0.294	0.259
Tourette Syndrome	D005879	0.33	0.35	0.181	0.398	0.356	0.382	0.33	0.316	0.16	0.406	0.474	0.376	0.367	0.323	0.347	0.384	0.435	0.412	0.398	0.331	0.369	0.313	0.352	0.329	0.334	0.312	0.351	0.359	0.416	0.312	0.1	0.333	0.345	0.327	0.339	0.36	0.309	0.412	0.287	0.313	0.357	0.333	0.325	0.461	0.341	0.314	0.34	0.307
Gingival overgrowth	D019214	0.368	0.62	0.19	0.571	0.562	0.577	0.615	0.624	0.239	0.482	0.379	0.588	0.615	0.738	0.61	0.634	0.45	0.582	0.501	0.408	0.51	0.591	0.597	0.548	0.552	0.614	0.612	0.61	0.547	0.606	0.217	0.564	0.589	0.459	0.619	0.599	0.624	0.543	0.639	0.597	0.607	0.652	0.543	0.425	0.665	0.551	0.56	0.61
Glaucoma	D005901	0.305	0.627	0.175	0.697	0.67	0.551	0.707	0.648	0.207	0.431	0.377	0.592	0.691	0.676	0.648	0.687	0.427	0.664	0.428	0.353	0.524	0.762	0.567	0.535	0.511	0.69	0.544	0.724	0.572	0.729	0.185	0.777	0.533	0.456	0.646	0.587	0.691	0.525	0.648	0.713	0.723	0.667	0.767	0.42	0.75	0.73	0.766	0.728
Glomerulonephritis	D005921	0.307	0.724	0.152	0.68	0.618	0.595	0.667	0.679	0.209	0.452	0.367	0.604	0.686	0.671	0.658	0.649	0.439	0.737	0.425	0.359	0.507	0.738	0.553	0.55	0.532	0.667	0.532	0.71	0.554	0.728	0.188	0.711	0.537	0.453	0.729	0.605	0.686	0.514	0.671	0.727	0.729	0.641	0.689	0.394	0.748	0.711	0.731	0.735
Glucose intolerance	D018149	0.32	0.664	0.199	0.672	0.663	0.582	0.697	0.653	0.24	0.398	0.375	0.661	0.67	0.677	0.657	0.658	0.457	0.586	0.423	0.365	0.529	0.726	0.574	0.547	0.515	0.817	0.539	0.694	0.573	0.745	0.203	0.7	0.546	0.49	0.654	0.586	0.755	0.543	0.642	0.696	0.738	0.621	0.71	0.424	0.695	0.699	0.701	0.702
Glycogen storage disease	D006008	0.429	0.594	0.188	0.538	0.464	0.552	0.55	0.609	0.228	0.453	0.427	0.596	0.577	0.52	0.54	0.57	0.439	0.61	0.461	0.398	0.477	0.501	0.495	0.501	0.545	0.5	0.509	0.53	0.501	0.508	0.148	0.511	0.553	0.396	0.538	0.512	0.503	0.497	0.543	0.56	0.553	0.55	0.472	0.377	0.53	0.472	0.49	0.5
Gonadal dysgenesis	D006059	0.328	0.375	0.22	0.367	0.349	0.414	0.375	0.35	0.23	0.391	0.313	0.357	0.411	0.398	0.349	0.374	0.264	0.358	0.564	0.517	0.367	0.339	0.375	0.305	0.388	0.389	0.439	0.364	0.415	0.338	0.211	0.348	0.387	0.38	0.39	0.301	0.398	0.405	0.373	0.352	0.367	0.369	0.321	0.373	0.375	0.303	0.332	0.336
Gout	D006073	0.295	0.665	0.195	0.74	0.62	0.578	0.739	0.692	0.225	0.412	0.372	0.612	0.665	0.709	0.704	0.643	0.448	0.587	0.417	0.376	0.492	0.721	0.574	0.532	0.53	0.672	0.552	0.691	0.558	0.691	0.213	0.667	0.531	0.505	0.646	0.574	0.694	0.527	0.677	0.765	0.714	0.705	0.669	0.434	0.832	0.67	0.663	0.719
Gram-Negative bacterial infection	D016905	0.321	0.641	0.156	0.615	0.591	0.586	0.647	0.67	0.203	0.461	0.381	0.585	0.62	0.617	0.619	0.612	0.465	0.576	0.434	0.388	0.538	0.632	0.536	0.549	0.526	0.608	0.526	0.654	0.559	0.615	0.173	0.635	0.562	0.473	0.606	0.582	0.645	0.542	0.63	0.663	0.646	0.59	0.595	0.39	0.625	0.612	0.609	0.652
Granulomatous Disease, Chronic	D006105	0.324	0.652	0.18	0.614	0.604	0.563	0.682	0.688	0.247	0.462	0.369	0.595	0.632	0.623	0.648	0.601	0.438	0.539	0.434	0.38	0.552	0.652	0.559	0.551	0.551	0.656	0.543	0.65	0.56	0.665	0.235	0.615	0.548	0.504	0.635	0.562	0.665	0.569	0.826	0.696	0.672	0.687	0.609	0.418	0.678	0.678	0.596	0.713
Graves disease	D006111	0.324	0.714	0.161	0.694	0.623	0.6	0.774	0.728	0.206	0.431	0.359	0.657	0.708	0.71	0.69	0.687	0.442	0.614	0.429	0.373	0.529	0.786	0.551	0.588	0.509	0.739	0.542	0.729	0.572	0.735	0.188	0.765	0.535	0.473	0.656	0.597	0.771	0.515	0.756	0.766	0.776	0.732	0.749	0.37	0.777	0.724	0.723	0.79
Fetal Growth Retardation	D005317	0.301	0.672	0.166	0.729	0.651	0.577	0.707	0.689	0.212	0.448	0.382	0.611	0.714	0.724	0.692	0.684	0.414	0.681	0.434	0.372	0.509	0.765	0.614	0.554	0.522	0.781	0.547	0.751	0.576	0.763	0.192	0.758	0.531	0.46	0.678	0.6	0.802	0.544	0.66	0.711	0.778	0.653	0.767	0.411	0.757	0.744	0.803	0.77
HELLP syndrome	D017359	0.359	0.497	0.166	0.435	0.398	0.444	0.48	0.501	0.216	0.44	0.376	0.45	0.445	0.472	0.5	0.403	0.439	0.421	0.477	0.391	0.532	0.444	0.431	0.421	0.44	0.46	0.458	0.455	0.474	0.446	0.245	0.426	0.506	0.451	0.493	0.418	0.491	0.421	0.523	0.496	0.457	0.499	0.379	0.379	0.454	0.395	0.39	0.458
HIV infections	D015658	0.314	0.649	0.166	0.68	0.631	0.578	0.681	0.675	0.21	0.401	0.354	0.59	0.679	0.671	0.649	0.666	0.437	0.584	0.394	0.354	0.506	0.819	0.52	0.536	0.501	0.67	0.511	0.724	0.531	0.747	0.177	0.816	0.512	0.459	0.602	0.572	0.717	0.489	0.664	0.712	0.746	0.625	0.848	0.388	0.696	0.762	0.786	0.791
HTLV-I infections	D015490	0.328	0.79	0.155	0.681	0.608	0.628	0.716	0.732	0.197	0.441	0.383	0.664	0.734	0.678	0.703	0.666	0.476	0.616	0.431	0.386	0.573	0.74	0.544	0.586	0.577	0.674	0.563	0.697	0.576	0.759	0.185	0.688	0.558	0.492	0.726	0.596	0.701	0.528	0.808	0.802	0.775	0.706	0.661	0.382	0.769	0.689	0.673	0.803
Pulmonary Fibrosis	D011658	0.317	0.726	0.156	0.718	0.646	0.62	0.732	0.685	0.199	0.419	0.402	0.642	0.707	0.692	0.677	0.688	0.46	0.611	0.451	0.395	0.515	0.775	0.626	0.535	0.552	0.676	0.605	0.752	0.597	0.761	0.174	0.733	0.583	0.474	0.745	0.622	0.711	0.544	0.677	0.754	0.768	0.651	0.715	0.434	0.758	0.704	0.714	0.773
Heart diseases	D006331	0.315	0.752	0.163	0.67	0.601	0.59	0.683	0.646	0.192	0.443	0.415	0.639	0.655	0.643	0.648	0.649	0.428	0.576	0.436	0.362	0.461	0.696	0.608	0.549	0.52	0.639	0.554	0.687	0.538	0.731	0.178	0.644	0.542	0.432	0.775	0.566	0.649	0.514	0.641	0.696	0.748	0.603	0.637	0.401	0.715	0.639	0.632	0.722
Heart failure	D006333	0.306	0.632	0.159	0.709	0.64	0.578	0.674	0.674	0.196	0.428	0.399	0.561	0.665	0.687	0.615	0.673	0.43	0.577	0.426	0.346	0.483	0.788	0.549	0.566	0.491	0.668	0.518	0.764	0.527	0.759	0.168	0.788	0.504	0.436	0.606	0.575	0.692	0.501	0.653	0.71	0.758	0.62	0.822	0.382	0.715	0.749	0.788	0.789
Heart valve diseases	D006349	0.337	0.358	0.17	0.385	0.342	0.405	0.36	0.341	0.201	0.315	0.341	0.375	0.39	0.34	0.327	0.376	0.316	0.343	0.342	0.399	0.338	0.318	0.343	0.271	0.387	0.326	0.348	0.337	0.364	0.304	0.131	0.321	0.341	0.291	0.316	0.317	0.328	0.367	0.346	0.325	0.352	0.385	0.315	0.307	0.342	0.303	0.325	0.33
Helicobacter infections	D016481	0.298	0.695	0.164	0.685	0.624	0.619	0.745	0.758	0.22	0.432	0.34	0.605	0.693	0.704	0.764	0.651	0.447	0.626	0.419	0.372	0.517	0.778	0.548	0.566	0.537	0.678	0.54	0.725	0.582	0.761	0.205	0.734	0.543	0.534	0.649	0.598	0.775	0.516	0.734	0.84	0.767	0.717	0.729	0.397	0.76	0.712	0.726	0.824
Helminthiasis	D006373	0.36	0.632	0.171	0.55	0.494	0.567	0.589	0.618	0.241	0.388	0.349	0.573	0.604	0.615	0.654	0.517	0.426	0.529	0.446	0.42	0.479	0.537	0.46	0.438	0.534	0.523	0.53	0.528	0.513	0.526	0.248	0.49	0.527	0.486	0.597	0.488	0.559	0.485	0.616	0.595	0.581	0.601	0.463	0.404	0.575	0.476	0.488	0.56
Hemangioma	D006391	0.313	0.386	0.147	0.286	0.285	0.37	0.364	0.386	0.17	0.345	0.281	0.37	0.358	0.338	0.331	0.338	0.359	0.363	0.359	0.374	0.356	0.312	0.298	0.31	0.415	0.333	0.374	0.311	0.311	0.318	0.122	0.312	0.348	0.253	0.346	0.347	0.34	0.372	0.398	0.334	0.345	0.384	0.292	0.262	0.315	0.297	0.304	0.339
Hematopoietic system disease		0.398	0.656	0.191	0.646	0.59	0.646	0.628	0.633	0.258	0.448	0.408	0.648	0.665	0.606	0.649	0.623	0.491	0.539	0.491	0.49	0.622	0.627	0.579	0.515	0.595	0.625	0.576	0.625	0.596	0.587	0.208	0.596	0.608	0.526	0.598	0.574	0.643	0.577	0.613	0.624	0.641	0.59	0.546	0.455	0.619	0.558	0.583	0.617
Hemoglobinopathies	D006453	0.263	0.248	0.145	0.199	0.209	0.234	0.23	0.285	0.1	0.366	0.289	0.258	0.225	0.237	0.241	0.232	0.301	0.254	0.274	0.251	0.246	0.22	0.207	0.291	0.232	0.202	0.247	0.217	0.24	0.226	0.102	0.216	0.206	0.222	0.212	0.266	0.216	0.289	0.232	0.232	0.235	0.231	0.213	0.198	0.2	0.214	0.207	0.246
Anemia, Hemolytic	D000743	0.329	0.624	0.204	0.592	0.637	0.632	0.606	0.713	0.272	0.457	0.37	0.575	0.608	0.654	0.691	0.596	0.469	0.54	0.387	0.349	0.516	0.678	0.511	0.545	0.488	0.622	0.535	0.611	0.554	0.708	0.236	0.626	0.556	0.548	0.592	0.608	0.633	0.525	0.682	0.693	0.684	0.603	0.6	0.396	0.609	0.594	0.608	0.688
Hemolytic-Uremic Syndrome	D006463	0.356	0.691	0.175	0.703	0.597	0.612	0.677	0.674	0.22	0.445	0.412	0.65	0.689	0.679	0.667	0.667	0.492	0.616	0.487	0.416	0.533	0.669	0.601	0.524	0.568	0.627	0.623	0.677	0.609	0.65	0.197	0.66	0.619	0.471	0.656	0.564	0.672	0.547	0.646	0.666	0.743	0.649	0.6	0.443	0.667	0.607	0.637	0.67
Hemophilia A	D006467	0.362	0.565	0.178	0.536	0.511	0.578	0.522	0.568	0.255	0.526	0.418	0.547	0.569	0.568	0.53	0.548	0.436	0.514	0.465	0.388	0.54	0.513	0.51	0.526	0.542	0.527	0.604	0.534	0.511	0.509	0.227	0.545	0.602	0.452	0.544	0.547	0.518	0.515	0.563	0.52	0.512	0.593	0.472	0.4	0.525	0.496	0.502	0.504
Hemorrhagic disorders	D006474	0.37	0.696	0.166	0.665	0.59	0.597	0.637	0.637	0.239	0.406	0.377	0.685	0.683	0.649	0.679	0.679	0.499	0.574	0.426	0.394	0.54	0.677	0.584	0.541	0.543	0.627	0.549	0.681	0.563	0.636	0.173	0.644	0.586	0.443	0.59	0.631	0.639	0.538	0.602	0.634	0.672	0.595	0.626	0.388	0.678	0.648	0.641	0.665
Purpura, Schoenlein-Henoch	D011695	0.296	0.742	0.155	0.66	0.587	0.593	0.752	0.698	0.203	0.43	0.345	0.611	0.692	0.652	0.673	0.616	0.435	0.594	0.446	0.37	0.519	0.723	0.643	0.614	0.557	0.678	0.53	0.745	0.555	0.743	0.199	0.661	0.551	0.554	0.775	0.599	0.709	0.523	0.712	0.799	0.786	0.743	0.658	0.391	0.838	0.686	0.655	0.754
Hepatitis	D006505	0.339	0.675	0.208	0.677	0.635	0.613	0.773	0.697	0.237	0.442	0.361	0.607	0.67	0.649	0.657	0.648	0.464	0.601	0.435	0.385	0.526	0.686	0.58	0.547	0.536	0.668	0.57	0.681	0.563	0.682	0.211	0.684	0.553	0.487	0.642	0.653	0.683	0.512	0.703	0.749	0.709	0.771	0.659	0.422	0.749	0.689	0.677	0.708
Hepatitis B	D006509	0.315	0.73	0.158	0.689	0.65	0.597	0.754	0.745	0.201	0.446	0.37	0.667	0.745	0.689	0.7	0.674	0.439	0.648	0.431	0.376	0.53	0.766	0.625	0.575	0.539	0.691	0.551	0.748	0.561	0.751	0.189	0.738	0.536	0.468	0.697	0.599	0.702	0.529	0.798	0.744	0.777	0.704	0.732	0.393	0.736	0.789	0.729	0.811
Hepatitis C	D006526	0.297	0.718	0.154	0.724	0.634	0.595	0.729	0.75	0.193	0.414	0.357	0.62	0.702	0.688	0.696	0.665	0.448	0.62	0.406	0.36	0.496	0.83	0.548	0.553	0.514	0.725	0.525	0.746	0.561	0.773	0.174	0.783	0.518	0.476	0.665	0.578	0.786	0.503	0.732	0.822	0.811	0.691	0.809	0.386	0.76	0.744	0.767	0.852
Hepatoblastoma	D018197	0.334	0.569	0.179	0.58	0.59	0.581	0.539	0.565	0.253	0.434	0.422	0.53	0.56	0.596	0.549	0.553	0.469	0.485	0.471	0.429	0.519	0.56	0.532	0.507	0.549	0.561	0.513	0.57	0.603	0.557	0.205	0.556	0.595	0.487	0.579	0.526	0.584	0.56	0.528	0.577	0.577	0.519	0.513	0.476	0.578	0.523	0.534	0.539
Genetic Diseases, Inborn	D030342	0.325	0.6	0.194	0.663	0.664	0.617	0.605	0.608	0.259	0.421	0.425	0.57	0.642	0.666	0.591	0.635	0.484	0.553	0.407	0.356	0.541	0.672	0.532	0.531	0.509	0.613	0.545	0.664	0.57	0.684	0.207	0.722	0.55	0.491	0.585	0.57	0.629	0.532	0.572	0.632	0.662	0.565	0.659	0.453	0.632	0.693	0.711	0.642
Colorectal Neoplasms, Hereditary Nonpolyposis	D003123	0.327	0.368	0.195	0.289	0.294	0.374	0.369	0.348	0.238	0.311	0.258	0.324	0.351	0.371	0.321	0.326	0.28	0.335	0.464	0.422	0.443	0.326	0.324	0.295	0.413	0.358	0.374	0.35	0.335	0.318	0.196	0.331	0.378	0.28	0.347	0.282	0.349	0.299	0.377	0.348	0.329	0.373	0.301	0.255	0.329	0.308	0.31	0.319
Herpes		0.326	0.679	0.169	0.711	0.662	0.574	0.7	0.681	0.219	0.443	0.368	0.629	0.698	0.7	0.671	0.693	0.462	0.674	0.421	0.362	0.512	0.795	0.521	0.568	0.501	0.667	0.569	0.726	0.571	0.752	0.187	0.811	0.551	0.463	0.623	0.585	0.695	0.504	0.661	0.732	0.754	0.628	0.805	0.407	0.699	0.766	0.804	0.779
Histiocytosis	D015614	0.308	0.649	0.175	0.635	0.632	0.578	0.674	0.666	0.214	0.448	0.359	0.597	0.649	0.647	0.668	0.613	0.438	0.746	0.441	0.362	0.538	0.676	0.559	0.514	0.52	0.679	0.539	0.671	0.558	0.666	0.211	0.656	0.528	0.473	0.651	0.566	0.668	0.594	0.792	0.696	0.685	0.665	0.661	0.445	0.691	0.718	0.684	0.723
Hodgkin disease	D006689	0.317	0.717	0.168	0.672	0.632	0.616	0.768	0.731	0.212	0.425	0.35	0.646	0.692	0.714	0.724	0.644	0.457	0.627	0.404	0.359	0.508	0.776	0.526	0.561	0.504	0.659	0.534	0.694	0.579	0.743	0.205	0.728	0.542	0.509	0.631	0.6	0.7	0.491	0.728	0.813	0.76	0.715	0.709	0.384	0.733	0.691	0.698	0.765
Huntington disease	D006816	0.33	0.629	0.188	0.679	0.656	0.586	0.651	0.635	0.233	0.459	0.401	0.602	0.673	0.669	0.698	0.673	0.476	0.608	0.483	0.408	0.529	0.688	0.606	0.549	0.539	0.704	0.558	0.69	0.583	0.688	0.196	0.704	0.541	0.486	0.65	0.594	0.725	0.549	0.608	0.655	0.695	0.615	0.668	0.444	0.679	0.656	0.686	0.692
Hydatidiform mole	D006828	0.243	0.269	0.34	0.228	0.257	0.281	0.255	0.254	0.214	0.27	0.203	0.276	0.255	0.28	0.273	0.267	0.233	0.261	0.323	0.321	0.313	0.248	0.274	0.24	0.27	0.27	0.27	0.24	0.259	0.267	0.215	0.254	0.305	0.296	0.266	0.263	0.26	0.252	0.273	0.254	0.26	0.247	0.231	0.302	0.257	0.228	0.23	0.237
Hydrocephalus	D006849	0.422	0.592	0.218	0.581	0.542	0.607	0.594	0.553	0.274	0.452	0.425	0.586	0.591	0.579	0.555	0.567	0.481	0.511	0.487	0.441	0.653	0.528	0.506	0.46	0.587	0.538	0.566	0.564	0.591	0.516	0.204	0.534	0.595	0.466	0.566	0.515	0.548	0.497	0.586	0.549	0.563	0.553	0.483	0.449	0.567	0.496	0.542	0.53
Hyperaldosteronism	D006929	0.315	0.522	0.177	0.597	0.563	0.579	0.528	0.54	0.278	0.527	0.419	0.518	0.571	0.59	0.514	0.565	0.375	0.528	0.485	0.384	0.498	0.545	0.638	0.562	0.498	0.573	0.607	0.597	0.598	0.584	0.237	0.549	0.595	0.481	0.657	0.566	0.548	0.594	0.541	0.525	0.533	0.56	0.502	0.462	0.575	0.52	0.539	0.522
Hypercholesterolemia	D006937	0.323	0.742	0.156	0.689	0.643	0.609	0.72	0.737	0.196	0.442	0.377	0.636	0.731	0.681	0.686	0.678	0.466	0.671	0.431	0.362	0.519	0.798	0.603	0.56	0.536	0.676	0.529	0.798	0.554	0.77	0.176	0.791	0.551	0.46	0.72	0.59	0.721	0.507	0.703	0.764	0.784	0.654	0.768	0.398	0.741	0.783	0.772	0.811
Hyperglycemia	D006943	0.308	0.673	0.175	0.716	0.651	0.566	0.683	0.687	0.21	0.421	0.377	0.603	0.686	0.696	0.666	0.676	0.413	0.619	0.405	0.365	0.484	0.815	0.589	0.542	0.508	0.737	0.533	0.744	0.539	0.791	0.195	0.805	0.506	0.444	0.679	0.58	0.725	0.518	0.68	0.744	0.779	0.639	0.808	0.386	0.738	0.775	0.781	0.794
Hyperhomocysteinemia	D020138	0.323	0.662	0.225	0.631	0.655	0.585	0.665	0.657	0.237	0.391	0.363	0.589	0.669	0.644	0.608	0.65	0.404	0.74	0.428	0.368	0.487	0.684	0.679	0.499	0.517	0.627	0.531	0.675	0.503	0.652	0.195	0.645	0.532	0.426	0.64	0.6	0.611	0.497	0.598	0.614	0.674	0.598	0.655	0.408	0.645	0.66	0.698	0.667
Hyperinsulinism	D006946	0.305	0.701	0.183	0.69	0.653	0.574	0.736	0.698	0.221	0.43	0.363	0.65	0.703	0.695	0.707	0.681	0.402	0.646	0.416	0.37	0.484	0.766	0.587	0.556	0.507	0.788	0.535	0.724	0.55	0.778	0.205	0.741	0.548	0.459	0.682	0.621	0.78	0.53	0.663	0.72	0.767	0.656	0.749	0.403	0.743	0.729	0.742	0.759
Hyperlipidemias	D006949	0.303	0.656	0.178	0.664	0.653	0.571	0.691	0.674	0.217	0.424	0.347	0.605	0.681	0.667	0.649	0.665	0.405	0.739	0.419	0.346	0.496	0.721	0.578	0.541	0.53	0.679	0.529	0.702	0.53	0.703	0.203	0.737	0.524	0.45	0.657	0.603	0.675	0.507	0.705	0.687	0.703	0.665	0.719	0.389	0.689	0.736	0.729	0.728
Hyperopia	D006956	0.278	0.602	0.15	0.676	0.617	0.572	0.591	0.631	0.22	0.463	0.442	0.564	0.621	0.617	0.573	0.598	0.44	0.526	0.471	0.379	0.465	0.601	0.538	0.505	0.545	0.621	0.565	0.629	0.603	0.591	0.191	0.611	0.556	0.518	0.597	0.53	0.634	0.559	0.574	0.618	0.641	0.576	0.556	0.48	0.641	0.565	0.592	0.609
Hyperparathyroidism	D006961	0.293	0.609	0.163	0.665	0.598	0.628	0.58	0.608	0.248	0.453	0.411	0.554	0.708	0.615	0.574	0.586	0.44	0.512	0.444	0.384	0.502	0.605	0.534	0.531	0.583	0.599	0.635	0.6	0.618	0.598	0.204	0.616	0.606	0.489	0.626	0.519	0.63	0.549	0.593	0.619	0.616	0.585	0.56	0.455	0.629	0.568	0.589	0.602
Hypertension	D006973	0.295	0.598	0.18	0.703	0.646	0.533	0.656	0.639	0.207	0.417	0.375	0.556	0.64	0.67	0.618	0.666	0.406	0.589	0.418	0.351	0.469	0.794	0.556	0.528	0.49	0.676	0.524	0.735	0.531	0.773	0.18	0.799	0.506	0.44	0.618	0.573	0.68	0.515	0.608	0.695	0.719	0.597	0.857	0.396	0.721	0.743	0.773	0.772
Hyperthyroidism	D006980	0.327	0.673	0.169	0.649	0.619	0.616	0.655	0.727	0.22	0.459	0.381	0.628	0.659	0.682	0.718	0.643	0.45	0.603	0.486	0.404	0.526	0.699	0.581	0.55	0.534	0.77	0.576	0.663	0.595	0.677	0.213	0.642	0.588	0.506	0.656	0.604	0.777	0.569	0.696	0.697	0.782	0.657	0.621	0.421	0.698	0.621	0.631	0.691
Hyperuricemia	D033461	0.314	0.438	0.251	0.424	0.538	0.475	0.468	0.454	0.234	0.386	0.353	0.447	0.43	0.496	0.451	0.485	0.383	0.58	0.417	0.362	0.436	0.486	0.572	0.44	0.429	0.515	0.452	0.476	0.459	0.489	0.186	0.503	0.455	0.39	0.499	0.506	0.472	0.454	0.462	0.453	0.449	0.463	0.478	0.399	0.453	0.525	0.48	0.448
Agammaglobulinemia	D000361	0.312	0.579	0.154	0.504	0.466	0.517	0.552	0.556	0.227	0.43	0.351	0.528	0.553	0.544	0.578	0.463	0.411	0.477	0.435	0.38	0.448	0.53	0.418	0.48	0.477	0.528	0.49	0.495	0.528	0.553	0.227	0.47	0.55	0.519	0.553	0.489	0.528	0.465	0.602	0.632	0.558	0.544	0.45	0.382	0.538	0.471	0.45	0.554
Hypoglycemia	D007003	0.309	0.501	0.205	0.538	0.575	0.5	0.544	0.505	0.233	0.409	0.365	0.502	0.519	0.556	0.521	0.539	0.419	0.758	0.431	0.334	0.48	0.558	0.569	0.45	0.456	0.583	0.473	0.584	0.5	0.559	0.178	0.547	0.496	0.395	0.583	0.535	0.545	0.508	0.506	0.511	0.544	0.509	0.553	0.409	0.555	0.57	0.595	0.56
Hypogonadism	D007006	0.377	0.494	0.206	0.514	0.57	0.505	0.465	0.469	0.346	0.53	0.424	0.515	0.532	0.507	0.492	0.488	0.412	0.446	0.53	0.397	0.536	0.456	0.479	0.452	0.466	0.515	0.53	0.467	0.562	0.471	0.342	0.47	0.565	0.49	0.497	0.462	0.49	0.603	0.483	0.47	0.484	0.489	0.428	0.517	0.481	0.418	0.467	0.445
Hypopituitarism	D007018	0.241	0.438	0.149	0.499	0.456	0.469	0.405	0.398	0.245	0.369	0.463	0.445	0.475	0.435	0.434	0.414	0.414	0.38	0.546	0.366	0.403	0.376	0.422	0.342	0.444	0.415	0.488	0.409	0.543	0.38	0.205	0.38	0.5	0.493	0.457	0.384	0.427	0.518	0.398	0.41	0.429	0.407	0.347	0.593	0.443	0.336	0.379	0.368
Hypothyroidism	D007037	0.314	0.723	0.16	0.697	0.645	0.608	0.738	0.737	0.213	0.443	0.374	0.647	0.74	0.715	0.767	0.681	0.447	0.633	0.443	0.386	0.526	0.768	0.57	0.579	0.523	0.806	0.554	0.718	0.582	0.775	0.201	0.73	0.542	0.499	0.676	0.595	0.807	0.555	0.777	0.759	0.812	0.7	0.742	0.409	0.735	0.744	0.731	0.816
Glomerulonephritis, IGA	D005922	0.312	0.731	0.157	0.695	0.638	0.606	0.763	0.743	0.194	0.413	0.368	0.644	0.721	0.732	0.721	0.667	0.436	0.612	0.412	0.371	0.497	0.824	0.592	0.561	0.51	0.673	0.549	0.754	0.541	0.815	0.181	0.758	0.535	0.456	0.719	0.605	0.704	0.51	0.698	0.768	0.81	0.661	0.771	0.371	0.781	0.746	0.753	0.83
Ichthyoses	D007057	0.375	0.312	0.309	0.362	0.401	0.381	0.322	0.299	0.252	0.282	0.365	0.37	0.343	0.35	0.34	0.437	0.391	0.368	0.351	0.377	0.448	0.325	0.385	0.295	0.361	0.351	0.344	0.332	0.399	0.331	0.171	0.341	0.343	0.352	0.348	0.417	0.334	0.401	0.29	0.303	0.343	0.333	0.343	0.42	0.352	0.314	0.355	0.31
Immune Complex Diseases	D007105	0.376	0.403	0.147	0.32	0.324	0.396	0.382	0.41	0.138	0.407	0.268	0.411	0.399	0.391	0.393	0.349	0.349	0.388	0.558	0.475	0.414	0.351	0.336	0.347	0.361	0.358	0.398	0.347	0.361	0.349	0.153	0.341	0.356	0.305	0.378	0.329	0.38	0.397	0.394	0.372	0.398	0.383	0.318	0.304	0.348	0.321	0.323	0.363
Immunologic deficiency syndromes	D007153	0.356	0.659	0.188	0.647	0.656	0.622	0.659	0.671	0.242	0.402	0.371	0.611	0.673	0.701	0.652	0.671	0.479	0.632	0.427	0.383	0.602	0.747	0.548	0.566	0.517	0.629	0.55	0.69	0.573	0.723	0.196	0.772	0.542	0.498	0.603	0.606	0.667	0.522	0.654	0.686	0.717	0.596	0.701	0.397	0.651	0.708	0.715	0.707
Spasms, Infantile	D013036	0.358	0.515	0.164	0.566	0.535	0.493	0.521	0.516	0.222	0.533	0.424	0.519	0.545	0.546	0.533	0.551	0.438	0.525	0.501	0.359	0.501	0.507	0.5	0.527	0.448	0.545	0.536	0.532	0.609	0.507	0.18	0.528	0.567	0.445	0.513	0.504	0.51	0.548	0.512	0.512	0.551	0.528	0.503	0.462	0.527	0.498	0.524	0.49
Infection	D007239	0.322	0.665	0.169	0.682	0.633	0.588	0.681	0.707	0.212	0.403	0.354	0.596	0.677	0.701	0.666	0.677	0.468	0.608	0.392	0.364	0.509	0.838	0.527	0.556	0.517	0.639	0.524	0.73	0.542	0.76	0.182	0.821	0.523	0.474	0.603	0.587	0.695	0.493	0.672	0.734	0.763	0.613	0.833	0.382	0.689	0.755	0.785	0.798
Cryptococcosis	D003453	0.373	0.289	0.155	0.207	0.198	0.266	0.278	0.278	0.107	0.223	0.23	0.311	0.271	0.242	0.267	0.241	0.253	0.233	0.31	0.407	0.282	0.231	0.203	0.227	0.253	0.212	0.259	0.231	0.214	0.224	0.131	0.224	0.227	0.216	0.229	0.223	0.231	0.222	0.259	0.238	0.257	0.259	0.215	0.189	0.22	0.218	0.212	0.24
Infectious lung disease		0.323	0.687	0.166	0.682	0.635	0.604	0.74	0.711	0.219	0.432	0.353	0.607	0.691	0.705	0.666	0.683	0.421	0.735	0.432	0.363	0.507	0.767	0.587	0.554	0.541	0.678	0.539	0.732	0.558	0.722	0.193	0.73	0.54	0.464	0.675	0.609	0.705	0.509	0.705	0.769	0.741	0.707	0.737	0.4	0.764	0.761	0.744	0.777
Infertility	D007246	0.315	0.72	0.176	0.716	0.722	0.599	0.752	0.721	0.22	0.446	0.366	0.645	0.714	0.675	0.713	0.68	0.442	0.605	0.425	0.371	0.511	0.799	0.565	0.565	0.526	0.694	0.554	0.742	0.559	0.785	0.194	0.759	0.543	0.49	0.697	0.597	0.741	0.534	0.762	0.786	0.797	0.704	0.787	0.404	0.774	0.755	0.755	0.844
Infiltrating cancer		0.327	0.673	0.179	0.627	0.602	0.622	0.664	0.665	0.237	0.432	0.351	0.613	0.661	0.679	0.63	0.648	0.447	0.606	0.459	0.43	0.523	0.652	0.546	0.516	0.574	0.635	0.567	0.657	0.544	0.636	0.2	0.634	0.569	0.51	0.631	0.596	0.673	0.521	0.66	0.662	0.663	0.637	0.601	0.398	0.648	0.604	0.626	0.649
Central Nervous System Infections	D002494	0.347	0.758	0.151	0.596	0.527	0.62	0.701	0.727	0.182	0.42	0.359	0.682	0.67	0.594	0.64	0.596	0.467	0.637	0.432	0.412	0.502	0.619	0.496	0.537	0.566	0.569	0.532	0.626	0.521	0.586	0.164	0.585	0.576	0.514	0.617	0.542	0.622	0.482	0.687	0.715	0.689	0.657	0.551	0.386	0.635	0.573	0.563	0.634
Influenza, Human	D007251	0.309	0.75	0.141	0.672	0.586	0.607	0.732	0.795	0.19	0.417	0.344	0.643	0.708	0.683	0.715	0.651	0.479	0.61	0.384	0.356	0.515	0.793	0.502	0.591	0.506	0.637	0.526	0.73	0.54	0.726	0.175	0.722	0.543	0.495	0.631	0.605	0.704	0.475	0.78	0.784	0.787	0.705	0.715	0.36	0.7	0.731	0.7	0.818
Angina, Unstable	D000789	0.306	0.744	0.148	0.655	0.59	0.611	0.728	0.731	0.205	0.451	0.35	0.667	0.696	0.671	0.789	0.633	0.449	0.614	0.423	0.366	0.504	0.738	0.634	0.564	0.536	0.673	0.532	0.763	0.547	0.725	0.198	0.68	0.561	0.507	0.7	0.573	0.764	0.518	0.804	0.785	0.742	0.684	0.686	0.395	0.72	0.738	0.663	0.828
Intestinal diseases	D007410	0.354	0.646	0.168	0.671	0.599	0.582	0.642	0.659	0.187	0.492	0.471	0.604	0.672	0.608	0.593	0.704	0.483	0.585	0.457	0.388	0.561	0.632	0.557	0.584	0.53	0.601	0.592	0.654	0.597	0.625	0.15	0.643	0.558	0.431	0.592	0.588	0.611	0.52	0.641	0.633	0.661	0.641	0.608	0.426	0.641	0.606	0.62	0.639
Intracranial aneurysm	D002532	0.306	0.767	0.167	0.709	0.612	0.617	0.67	0.655	0.231	0.441	0.415	0.63	0.662	0.675	0.653	0.642	0.452	0.559	0.456	0.388	0.525	0.67	0.587	0.505	0.592	0.653	0.572	0.686	0.605	0.676	0.201	0.623	0.552	0.489	0.735	0.57	0.7	0.553	0.661	0.73	0.73	0.657	0.604	0.437	0.752	0.602	0.653	0.701
Intracranial hypertension	D019586	0.362	0.537	0.184	0.52	0.486	0.538	0.532	0.518	0.26	0.434	0.406	0.538	0.549	0.545	0.524	0.506	0.453	0.465	0.509	0.475	0.743	0.494	0.491	0.43	0.562	0.548	0.538	0.522	0.57	0.47	0.195	0.495	0.491	0.471	0.495	0.436	0.572	0.555	0.558	0.507	0.522	0.521	0.447	0.411	0.528	0.457	0.472	0.505
Drug Resistant Epilepsy	D000069279	0.334	0.71	0.187	0.616	0.559	0.617	0.658	0.703	0.189	0.489	0.416	0.584	0.691	0.611	0.578	0.628	0.425	0.598	0.46	0.377	0.508	0.57	0.504	0.516	0.554	0.54	0.589	0.612	0.565	0.563	0.155	0.575	0.541	0.453	0.584	0.553	0.569	0.492	0.625	0.613	0.638	0.624	0.535	0.446	0.618	0.554	0.585	0.604
Uveal melanoma	C536494	0.318	0.689	0.167	0.66	0.616	0.584	0.68	0.69	0.242	0.396	0.372	0.657	0.679	0.682	0.695	0.651	0.449	0.559	0.44	0.375	0.522	0.693	0.526	0.516	0.488	0.652	0.558	0.677	0.6	0.666	0.202	0.672	0.54	0.489	0.621	0.544	0.666	0.507	0.648	0.653	0.79	0.614	0.647	0.398	0.675	0.711	0.72	0.686
Iron overload	D019190	0.336	0.308	0.219	0.263	0.294	0.341	0.283	0.296	0.573	0.291	0.175	0.271	0.288	0.376	0.284	0.272	0.233	0.257	0.397	0.39	0.363	0.288	0.301	0.318	0.343	0.307	0.381	0.279	0.341	0.281	0.31	0.294	0.409	0.404	0.314	0.299	0.308	0.324	0.335	0.31	0.279	0.291	0.258	0.286	0.291	0.273	0.271	0.27
Ischemia	D007511	0.31	0.607	0.169	0.709	0.642	0.578	0.654	0.645	0.21	0.433	0.394	0.566	0.66	0.697	0.61	0.681	0.423	0.632	0.408	0.346	0.508	0.785	0.558	0.55	0.494	0.691	0.527	0.739	0.543	0.754	0.176	0.813	0.506	0.426	0.634	0.582	0.688	0.503	0.622	0.677	0.723	0.594	0.811	0.381	0.712	0.782	0.824	0.748
Sarcoma, Kaposi	D012514	0.33	0.712	0.172	0.687	0.639	0.71	0.685	0.684	0.236	0.434	0.383	0.663	0.721	0.696	0.645	0.666	0.457	0.612	0.483	0.399	0.525	0.693	0.577	0.529	0.554	0.638	0.581	0.699	0.592	0.677	0.195	0.69	0.585	0.52	0.638	0.583	0.661	0.537	0.637	0.698	0.733	0.609	0.646	0.463	0.69	0.626	0.689	0.681
Keratoconjunctivitis Sicca	D007638	0.314	0.76	0.166	0.661	0.607	0.626	0.667	0.68	0.207	0.455	0.395	0.61	0.685	0.648	0.652	0.645	0.46	0.59	0.433	0.371	0.548	0.691	0.56	0.529	0.591	0.639	0.552	0.693	0.558	0.703	0.185	0.683	0.546	0.478	0.73	0.578	0.662	0.524	0.687	0.728	0.736	0.657	0.623	0.394	0.747	0.7	0.688	0.729
Keratoconus	D007640	0.338	0.461	0.183	0.485	0.452	0.433	0.434	0.475	0.281	0.454	0.442	0.447	0.454	0.438	0.447	0.433	0.391	0.418	0.398	0.369	0.427	0.417	0.401	0.421	0.463	0.396	0.438	0.442	0.492	0.428	0.264	0.421	0.51	0.428	0.452	0.451	0.413	0.452	0.428	0.447	0.444	0.421	0.387	0.444	0.447	0.399	0.411	0.436
Keratosis	D007642	0.339	0.603	0.168	0.637	0.596	0.569	0.601	0.609	0.218	0.481	0.417	0.578	0.658	0.662	0.602	0.636	0.449	0.539	0.48	0.393	0.549	0.626	0.507	0.581	0.541	0.617	0.659	0.615	0.604	0.615	0.189	0.645	0.57	0.453	0.576	0.532	0.647	0.528	0.611	0.609	0.63	0.606	0.58	0.41	0.615	0.592	0.608	0.62
Kidney Neoplasms	D007680	0.411	0.436	0.226	0.339	0.409	0.486	0.404	0.415	0.332	0.373	0.285	0.414	0.407	0.458	0.418	0.381	0.386	0.364	0.45	0.405	0.51	0.397	0.379	0.416	0.394	0.415	0.456	0.371	0.407	0.421	0.323	0.405	0.501	0.483	0.432	0.409	0.412	0.391	0.449	0.407	0.393	0.399	0.352	0.354	0.377	0.361	0.372	0.371
Kidney diseases	D007674	0.297	0.637	0.162	0.714	0.641	0.566	0.678	0.672	0.2	0.422	0.392	0.599	0.68	0.691	0.659	0.677	0.436	0.599	0.425	0.357	0.488	0.791	0.588	0.532	0.52	0.687	0.55	0.754	0.563	0.748	0.167	0.782	0.524	0.447	0.644	0.573	0.728	0.526	0.661	0.703	0.748	0.614	0.812	0.422	0.72	0.761	0.765	0.806
Renal Insufficiency	D051437	0.299	0.681	0.174	0.691	0.65	0.575	0.71	0.684	0.205	0.412	0.352	0.604	0.679	0.693	0.658	0.662	0.431	0.643	0.403	0.347	0.49	0.824	0.555	0.536	0.508	0.661	0.525	0.759	0.535	0.768	0.182	0.799	0.515	0.451	0.645	0.578	0.691	0.5	0.677	0.759	0.753	0.642	0.845	0.393	0.739	0.768	0.799	0.812
Kuhnt-Junius degeneration		0.318	0.486	0.247	0.51	0.51	0.479	0.49	0.478	0.337	0.395	0.326	0.487	0.489	0.545	0.464	0.53	0.364	0.481	0.379	0.373	0.507	0.478	0.485	0.466	0.508	0.548	0.53	0.51	0.531	0.505	0.246	0.494	0.551	0.487	0.528	0.472	0.517	0.452	0.473	0.505	0.501	0.481	0.461	0.381	0.531	0.508	0.512	0.479
Laryngeal Neoplasms	D007822	0.343	0.781	0.187	0.633	0.607	0.616	0.68	0.725	0.226	0.418	0.371	0.64	0.674	0.649	0.671	0.639	0.484	0.663	0.446	0.383	0.526	0.684	0.55	0.541	0.584	0.636	0.543	0.664	0.558	0.704	0.196	0.644	0.566	0.463	0.724	0.595	0.664	0.52	0.698	0.758	0.745	0.653	0.63	0.402	0.733	0.645	0.636	0.712
Late pregnancy		0.299	0.642	0.17	0.691	0.675	0.587	0.654	0.65	0.242	0.458	0.391	0.618	0.665	0.684	0.649	0.66	0.421	0.584	0.432	0.363	0.512	0.706	0.591	0.57	0.515	0.91	0.56	0.691	0.603	0.743	0.222	0.693	0.567	0.513	0.68	0.608	0.81	0.569	0.657	0.697	0.741	0.641	0.683	0.437	0.705	0.683	0.681	0.683
Learning disorders	D007859	0.303	0.454	0.2	0.437	0.486	0.464	0.47	0.456	0.213	0.393	0.316	0.438	0.441	0.5	0.462	0.474	0.403	0.79	0.423	0.315	0.452	0.471	0.47	0.407	0.404	0.51	0.435	0.495	0.453	0.467	0.182	0.487	0.453	0.386	0.511	0.493	0.476	0.432	0.454	0.45	0.453	0.47	0.472	0.416	0.47	0.502	0.536	0.446
Leigh disease	D007888	0.342	0.372	0.26	0.423	0.441	0.431	0.353	0.355	0.307	0.378	0.356	0.374	0.402	0.402	0.359	0.409	0.361	0.364	0.43	0.403	0.438	0.371	0.419	0.342	0.394	0.412	0.424	0.389	0.437	0.382	0.242	0.399	0.441	0.407	0.395	0.359	0.391	0.44	0.359	0.359	0.38	0.352	0.365	0.446	0.401	0.353	0.389	0.34
Leiomyosarcoma	D007890	0.36	0.347	0.224	0.288	0.311	0.356	0.343	0.326	0.156	0.382	0.374	0.355	0.338	0.346	0.327	0.336	0.343	0.342	0.474	0.466	0.396	0.312	0.335	0.312	0.313	0.339	0.395	0.327	0.345	0.314	0.17	0.32	0.341	0.246	0.344	0.303	0.337	0.408	0.335	0.316	0.337	0.353	0.296	0.308	0.322	0.285	0.307	0.309
Leprosy	D007918	0.313	0.691	0.148	0.642	0.582	0.585	0.713	0.776	0.232	0.414	0.334	0.586	0.678	0.685	0.673	0.64	0.461	0.6	0.401	0.356	0.496	0.745	0.501	0.577	0.515	0.645	0.516	0.691	0.544	0.738	0.186	0.696	0.52	0.492	0.617	0.581	0.72	0.49	0.79	0.772	0.742	0.664	0.702	0.342	0.69	0.756	0.682	0.832
Leukemia	D007938	0.309	0.621	0.174	0.676	0.632	0.561	0.65	0.651	0.213	0.386	0.355	0.567	0.645	0.673	0.63	0.65	0.429	0.564	0.4	0.358	0.488	0.824	0.533	0.522	0.489	0.651	0.507	0.716	0.53	0.742	0.176	0.811	0.494	0.446	0.594	0.56	0.696	0.495	0.621	0.697	0.742	0.592	0.882	0.386	0.688	0.747	0.789	0.786
Leukodystrophy, Metachromatic	D007966	0.361	0.529	0.211	0.486	0.5	0.517	0.495	0.531	0.242	0.354	0.368	0.478	0.487	0.53	0.494	0.498	0.691	0.475	0.389	0.36	0.501	0.494	0.441	0.485	0.487	0.478	0.415	0.523	0.513	0.491	0.171	0.482	0.466	0.464	0.503	0.468	0.52	0.428	0.511	0.514	0.509	0.461	0.469	0.368	0.493	0.476	0.479	0.506
Leukoencephalopathies	D056784	0.333	0.716	0.18	0.716	0.676	0.649	0.675	0.69	0.255	0.433	0.364	0.611	0.697	0.716	0.646	0.679	0.449	0.576	0.433	0.392	0.542	0.782	0.567	0.557	0.561	0.66	0.573	0.732	0.593	0.753	0.204	0.797	0.564	0.503	0.666	0.61	0.705	0.534	0.653	0.735	0.75	0.624	0.748	0.419	0.729	0.705	0.75	0.753
Leukopenia	D007970	0.302	0.407	0.264	0.463	0.467	0.459	0.383	0.404	0.358	0.43	0.375	0.4	0.434	0.442	0.415	0.437	0.33	0.426	0.414	0.437	0.422	0.387	0.441	0.389	0.405	0.452	0.503	0.385	0.518	0.406	0.337	0.408	0.525	0.461	0.452	0.436	0.424	0.541	0.396	0.415	0.414	0.415	0.383	0.482	0.437	0.369	0.409	0.379
Lewy body disease	D020961	0.335	0.222	0.267	0.204	0.236	0.246	0.224	0.211	0.137	0.285	0.3	0.256	0.219	0.226	0.221	0.253	0.373	0.249	0.273	0.308	0.275	0.213	0.225	0.216	0.218	0.213	0.25	0.211	0.239	0.213	0.115	0.219	0.231	0.168	0.198	0.254	0.203	0.249	0.198	0.201	0.216	0.228	0.219	0.235	0.201	0.198	0.228	0.202
Lichen planus	D008010	0.311	0.67	0.159	0.627	0.588	0.58	0.689	0.72	0.227	0.459	0.37	0.613	0.685	0.658	0.71	0.616	0.445	0.558	0.438	0.376	0.553	0.685	0.528	0.575	0.555	0.656	0.56	0.657	0.565	0.675	0.214	0.654	0.545	0.494	0.631	0.563	0.679	0.523	0.822	0.709	0.71	0.685	0.636	0.391	0.706	0.707	0.629	0.752
Lipodystrophy	D008060	0.315	0.734	0.16	0.68	0.623	0.613	0.763	0.746	0.215	0.454	0.36	0.645	0.725	0.665	0.755	0.675	0.435	0.624	0.432	0.38	0.55	0.727	0.557	0.574	0.538	0.775	0.546	0.701	0.581	0.724	0.202	0.701	0.552	0.516	0.675	0.589	0.821	0.532	0.816	0.751	0.762	0.725	0.696	0.417	0.724	0.724	0.69	0.804
Lipidoses	D008064	0.29	0.337	0.212	0.344	0.335	0.336	0.327	0.341	0.285	0.356	0.283	0.343	0.342	0.363	0.357	0.352	0.307	0.352	0.359	0.318	0.342	0.338	0.394	0.339	0.348	0.384	0.355	0.34	0.367	0.341	0.218	0.332	0.364	0.312	0.357	0.357	0.374	0.369	0.348	0.347	0.34	0.38	0.335	0.325	0.365	0.339	0.33	0.34
Liver Neoplasms	D008113	0.314	0.623	0.179	0.682	0.644	0.564	0.658	0.648	0.222	0.393	0.358	0.575	0.655	0.679	0.639	0.652	0.434	0.598	0.401	0.361	0.492	0.814	0.534	0.514	0.493	0.659	0.52	0.719	0.54	0.74	0.181	0.823	0.502	0.444	0.592	0.566	0.694	0.489	0.629	0.675	0.739	0.593	0.871	0.389	0.682	0.776	0.817	0.779
Liver diseases	D008107	0.314	0.711	0.18	0.7	0.66	0.592	0.707	0.726	0.215	0.417	0.352	0.62	0.703	0.708	0.693	0.697	0.426	0.672	0.408	0.371	0.503	0.829	0.575	0.555	0.515	0.755	0.541	0.748	0.543	0.777	0.192	0.782	0.53	0.462	0.681	0.597	0.779	0.505	0.685	0.764	0.812	0.657	0.81	0.389	0.751	0.774	0.803	0.806
Liver failure	D017093	0.369	0.611	0.237	0.568	0.578	0.603	0.6	0.629	0.237	0.451	0.377	0.565	0.591	0.598	0.588	0.581	0.472	0.57	0.458	0.424	0.573	0.572	0.565	0.486	0.578	0.598	0.535	0.601	0.528	0.605	0.21	0.56	0.541	0.482	0.644	0.575	0.642	0.509	0.62	0.635	0.587	0.58	0.519	0.414	0.601	0.526	0.541	0.586
Liver metastases		0.38	0.674	0.208	0.606	0.576	0.591	0.68	0.674	0.209	0.414	0.382	0.624	0.648	0.641	0.629	0.644	0.47	0.584	0.458	0.432	0.588	0.649	0.606	0.528	0.58	0.626	0.564	0.68	0.533	0.648	0.18	0.613	0.577	0.459	0.628	0.592	0.631	0.513	0.667	0.651	0.667	0.651	0.593	0.376	0.654	0.626	0.616	0.658
Liver tumor		0.313	0.656	0.182	0.688	0.671	0.627	0.662	0.684	0.227	0.455	0.368	0.597	0.642	0.679	0.654	0.655	0.478	0.651	0.435	0.382	0.531	0.724	0.565	0.553	0.543	0.697	0.549	0.702	0.58	0.723	0.2	0.737	0.537	0.507	0.649	0.584	0.709	0.537	0.662	0.703	0.711	0.63	0.696	0.424	0.702	0.715	0.713	0.73
Long QT syndrome	D008133	0.283	0.47	0.138	0.59	0.515	0.459	0.491	0.488	0.149	0.498	0.544	0.433	0.523	0.558	0.454	0.591	0.408	0.473	0.427	0.294	0.411	0.515	0.472	0.605	0.407	0.525	0.525	0.553	0.532	0.546	0.134	0.572	0.414	0.364	0.475	0.483	0.495	0.484	0.48	0.496	0.533	0.531	0.512	0.391	0.529	0.504	0.544	0.51
Lung cancer	D008175	0.313	0.626	0.186	0.683	0.648	0.559	0.658	0.662	0.226	0.397	0.349	0.575	0.639	0.678	0.64	0.661	0.428	0.585	0.402	0.357	0.488	0.833	0.538	0.518	0.497	0.673	0.517	0.736	0.529	0.771	0.186	0.837	0.504	0.455	0.608	0.573	0.709	0.489	0.627	0.707	0.748	0.593	0.876	0.387	0.702	0.763	0.798	0.788
Lung diseases	D008171	0.32	0.696	0.17	0.681	0.638	0.623	0.699	0.742	0.217	0.432	0.369	0.619	0.705	0.689	0.687	0.686	0.465	0.603	0.41	0.367	0.505	0.771	0.561	0.58	0.529	0.716	0.55	0.728	0.553	0.813	0.196	0.733	0.528	0.496	0.646	0.6	0.738	0.52	0.67	0.723	0.742	0.651	0.712	0.381	0.693	0.695	0.711	0.753
Lupus Erythematosus, Cutaneous	D008178	0.308	0.659	0.161	0.688	0.634	0.561	0.686	0.685	0.201	0.412	0.351	0.613	0.679	0.672	0.674	0.663	0.44	0.621	0.402	0.359	0.502	0.833	0.547	0.551	0.496	0.659	0.514	0.754	0.535	0.764	0.18	0.821	0.506	0.463	0.629	0.569	0.698	0.487	0.682	0.734	0.763	0.627	0.867	0.38	0.71	0.784	0.802	0.821
Lupus vulgaris	D008177	0.322	0.772	0.164	0.715	0.663	0.618	0.734	0.731	0.216	0.445	0.38	0.67	0.755	0.688	0.678	0.676	0.434	0.603	0.433	0.379	0.542	0.781	0.62	0.58	0.561	0.68	0.566	0.769	0.562	0.771	0.188	0.734	0.556	0.472	0.75	0.604	0.702	0.528	0.743	0.75	0.796	0.685	0.731	0.393	0.768	0.729	0.733	0.812
Lyme disease	D008193	0.324	0.84	0.153	0.67	0.587	0.634	0.828	0.767	0.197	0.42	0.356	0.642	0.731	0.655	0.698	0.635	0.527	0.626	0.433	0.385	0.521	0.721	0.531	0.569	0.565	0.655	0.539	0.702	0.559	0.712	0.185	0.654	0.555	0.501	0.736	0.571	0.707	0.502	0.768	0.843	0.786	0.803	0.654	0.388	0.805	0.677	0.653	0.761
Lymphatic metastasis	D008207	0.316	0.433	0.177	0.41	0.351	0.427	0.41	0.389	0.25	0.338	0.275	0.427	0.417	0.429	0.405	0.405	0.345	0.378	0.383	0.387	0.46	0.382	0.503	0.324	0.495	0.401	0.443	0.413	0.385	0.381	0.193	0.377	0.435	0.321	0.404	0.371	0.409	0.383	0.419	0.378	0.386	0.429	0.356	0.299	0.409	0.377	0.375	0.382
Lymphoma	D008223	0.31	0.656	0.173	0.696	0.651	0.606	0.665	0.687	0.207	0.405	0.359	0.579	0.677	0.711	0.67	0.65	0.468	0.582	0.409	0.378	0.511	0.803	0.541	0.546	0.51	0.65	0.528	0.714	0.559	0.766	0.177	0.751	0.522	0.493	0.626	0.601	0.714	0.502	0.656	0.742	0.736	0.605	0.756	0.397	0.699	0.721	0.741	0.776
Lymphopenia	D008231	0.322	0.7	0.142	0.609	0.538	0.601	0.668	0.685	0.18	0.42	0.379	0.621	0.67	0.597	0.632	0.576	0.519	0.6	0.423	0.38	0.571	0.617	0.499	0.555	0.543	0.586	0.55	0.613	0.56	0.611	0.175	0.601	0.526	0.496	0.641	0.545	0.648	0.484	0.701	0.681	0.663	0.665	0.54	0.376	0.634	0.561	0.563	0.662
Lymphoproliferative disorders	D008232	0.355	0.7	0.143	0.649	0.561	0.635	0.681	0.695	0.184	0.425	0.401	0.625	0.707	0.636	0.642	0.651	0.466	0.582	0.462	0.444	0.535	0.651	0.526	0.55	0.57	0.575	0.591	0.665	0.544	0.632	0.164	0.62	0.568	0.495	0.654	0.576	0.649	0.512	0.705	0.67	0.677	0.653	0.577	0.39	0.651	0.584	0.595	0.675
Lysosomal storage diseases	D016464	0.303	0.483	0.198	0.525	0.5	0.495	0.495	0.505	0.29	0.388	0.384	0.49	0.524	0.535	0.473	0.526	0.418	0.504	0.413	0.341	0.499	0.485	0.47	0.494	0.505	0.516	0.494	0.507	0.529	0.48	0.202	0.5	0.495	0.453	0.497	0.489	0.487	0.46	0.494	0.497	0.504	0.489	0.484	0.394	0.521	0.558	0.504	0.49
Macular degeneration	D008268	0.305	0.727	0.156	0.704	0.637	0.619	0.73	0.71	0.209	0.437	0.38	0.649	0.72	0.701	0.667	0.668	0.453	0.701	0.436	0.371	0.506	0.749	0.578	0.524	0.545	0.649	0.55	0.764	0.564	0.708	0.18	0.732	0.542	0.47	0.657	0.581	0.688	0.54	0.67	0.716	0.755	0.652	0.743	0.433	0.712	0.732	0.774	0.77
Malaria	D008288	0.314	0.688	0.169	0.699	0.654	0.587	0.716	0.701	0.198	0.433	0.371	0.66	0.699	0.686	0.681	0.682	0.443	0.688	0.424	0.373	0.516	0.743	0.572	0.521	0.542	0.665	0.546	0.732	0.55	0.729	0.182	0.727	0.521	0.449	0.637	0.588	0.676	0.542	0.729	0.711	0.75	0.664	0.745	0.417	0.723	0.761	0.759	0.786
Malignant childhood tumor		0.252	0.219	0.196	0.212	0.23	0.26	0.206	0.22	0.222	0.276	0.247	0.245	0.19	0.231	0.231	0.245	0.309	0.232	0.229	0.221	0.243	0.224	0.294	0.219	0.227	0.221	0.208	0.233	0.213	0.226	0.151	0.215	0.238	0.201	0.208	0.29	0.207	0.214	0.195	0.212	0.203	0.226	0.224	0.227	0.21	0.22	0.223	0.212
Histiocytoma, Malignant Fibrous	D051677	0.355	0.434	0.208	0.423	0.376	0.453	0.422	0.392	0.194	0.411	0.366	0.427	0.472	0.426	0.394	0.422	0.282	0.383	0.546	0.566	0.401	0.372	0.428	0.332	0.439	0.428	0.513	0.402	0.458	0.367	0.198	0.374	0.422	0.369	0.421	0.362	0.439	0.46	0.432	0.386	0.411	0.446	0.348	0.394	0.419	0.332	0.36	0.378
Glioma	D005910	0.315	0.685	0.177	0.694	0.647	0.596	0.707	0.689	0.225	0.402	0.346	0.631	0.702	0.715	0.695	0.694	0.447	0.593	0.403	0.371	0.52	0.791	0.583	0.561	0.52	0.673	0.555	0.725	0.562	0.732	0.198	0.736	0.546	0.459	0.634	0.598	0.685	0.5	0.732	0.722	0.755	0.659	0.741	0.388	0.715	0.812	0.772	0.782
Malnutrition	D044342	0.324	0.763	0.163	0.599	0.562	0.599	0.6	0.644	0.251	0.46	0.393	0.594	0.61	0.633	0.631	0.596	0.462	0.559	0.443	0.377	0.53	0.618	0.517	0.527	0.587	0.609	0.524	0.633	0.549	0.669	0.206	0.573	0.541	0.462	0.754	0.591	0.626	0.533	0.664	0.703	0.677	0.624	0.559	0.398	0.713	0.591	0.566	0.668
Mastocytosis	D008415	0.292	0.212	0.187	0.174	0.185	0.215	0.204	0.196	0.108	0.197	0.225	0.239	0.199	0.202	0.187	0.224	0.24	0.192	0.193	0.302	0.231	0.179	0.176	0.152	0.266	0.166	0.207	0.192	0.178	0.183	0.088	0.19	0.191	0.143	0.186	0.218	0.165	0.193	0.177	0.173	0.189	0.195	0.179	0.177	0.178	0.184	0.194	0.172
Melanoma	D008545	0.312	0.651	0.16	0.693	0.631	0.579	0.687	0.68	0.206	0.411	0.357	0.58	0.662	0.69	0.634	0.66	0.444	0.589	0.402	0.352	0.497	0.826	0.529	0.556	0.492	0.642	0.516	0.734	0.546	0.749	0.172	0.805	0.512	0.45	0.594	0.575	0.691	0.49	0.671	0.734	0.751	0.627	0.856	0.38	0.708	0.761	0.782	0.803
Meningioma	D008579	0.37	0.571	0.27	0.562	0.61	0.597	0.544	0.536	0.263	0.368	0.365	0.586	0.586	0.62	0.561	0.596	0.449	0.494	0.438	0.432	0.512	0.571	0.653	0.469	0.55	0.563	0.522	0.591	0.49	0.554	0.185	0.557	0.482	0.457	0.518	0.546	0.566	0.494	0.5	0.527	0.592	0.502	0.541	0.39	0.565	0.537	0.572	0.54
Intellectual Disability	D008607	0.328	0.629	0.18	0.706	0.679	0.581	0.648	0.631	0.227	0.44	0.427	0.592	0.663	0.67	0.613	0.684	0.487	0.571	0.46	0.362	0.492	0.717	0.575	0.533	0.511	0.655	0.565	0.712	0.594	0.695	0.174	0.745	0.543	0.477	0.615	0.578	0.642	0.531	0.594	0.646	0.726	0.596	0.711	0.467	0.658	0.665	0.726	0.681
Mesothelioma	D008654	0.47	0.52	0.213	0.492	0.466	0.489	0.488	0.441	0.214	0.432	0.4	0.558	0.519	0.478	0.494	0.501	0.493	0.454	0.483	0.401	0.503	0.449	0.486	0.437	0.464	0.444	0.492	0.475	0.504	0.429	0.198	0.437	0.654	0.399	0.468	0.47	0.44	0.479	0.429	0.451	0.513	0.455	0.411	0.477	0.464	0.412	0.441	0.425
Metabolic syndrome X	D024821	0.285	0.614	0.171	0.627	0.606	0.564	0.639	0.616	0.235	0.41	0.359	0.578	0.613	0.629	0.634	0.604	0.421	0.606	0.423	0.357	0.48	0.691	0.569	0.547	0.497	0.777	0.508	0.645	0.568	0.7	0.206	0.64	0.554	0.482	0.672	0.582	0.737	0.534	0.652	0.716	0.671	0.616	0.643	0.394	0.676	0.667	0.626	0.715
Metabolism disease		0.297	0.65	0.178	0.688	0.648	0.575	0.651	0.641	0.229	0.406	0.336	0.581	0.65	0.675	0.629	0.654	0.415	0.586	0.4	0.349	0.482	0.788	0.566	0.538	0.497	0.758	0.505	0.707	0.534	0.786	0.196	0.754	0.518	0.45	0.679	0.601	0.714	0.519	0.627	0.711	0.737	0.605	0.779	0.397	0.736	0.756	0.755	0.757
Polyps	D011127	0.314	0.64	0.177	0.678	0.615	0.592	0.666	0.646	0.223	0.427	0.365	0.629	0.656	0.67	0.654	0.648	0.428	0.603	0.429	0.394	0.489	0.681	0.582	0.555	0.494	0.763	0.609	0.666	0.604	0.72	0.213	0.675	0.586	0.483	0.64	0.566	0.69	0.558	0.633	0.677	0.686	0.639	0.65	0.402	0.672	0.631	0.66	0.666
Lymph Nodes	D008198	0.347	0.68	0.179	0.656	0.647	0.595	0.683	0.711	0.214	0.4	0.377	0.64	0.697	0.682	0.668	0.665	0.563	0.629	0.429	0.395	0.542	0.699	0.546	0.564	0.545	0.654	0.539	0.684	0.557	0.698	0.18	0.697	0.552	0.473	0.625	0.616	0.679	0.575	0.661	0.71	0.728	0.637	0.678	0.403	0.702	0.68	0.683	0.712
Metastatic cancer to brain		0.321	0.475	0.202	0.44	0.498	0.48	0.482	0.471	0.229	0.391	0.348	0.472	0.457	0.527	0.474	0.495	0.405	0.599	0.423	0.362	0.463	0.483	0.479	0.448	0.456	0.512	0.464	0.483	0.475	0.494	0.186	0.52	0.46	0.393	0.515	0.501	0.48	0.447	0.488	0.472	0.471	0.485	0.479	0.387	0.465	0.554	0.498	0.462
Migraine Disorders	D008881	0.306	0.71	0.165	0.69	0.667	0.583	0.704	0.695	0.202	0.47	0.392	0.614	0.685	0.662	0.661	0.665	0.427	0.6	0.433	0.336	0.5	0.784	0.566	0.566	0.519	0.67	0.532	0.731	0.55	0.756	0.182	0.727	0.526	0.449	0.674	0.586	0.682	0.534	0.738	0.743	0.774	0.658	0.75	0.404	0.732	0.751	0.718	0.818
Mitochondrial diseases	D028361	0.389	0.222	0.273	0.302	0.359	0.374	0.222	0.218	0.374	0.267	0.3	0.254	0.269	0.275	0.224	0.307	0.307	0.229	0.243	0.258	0.316	0.246	0.302	0.213	0.294	0.249	0.269	0.257	0.303	0.27	0.213	0.266	0.307	0.324	0.235	0.289	0.243	0.304	0.214	0.215	0.239	0.219	0.252	0.329	0.262	0.226	0.278	0.21
Mitochondrial encephalomyopathies	D017237	0.253	0.15	0.31	0.188	0.254	0.22	0.154	0.158	0.592	0.319	0.155	0.16	0.167	0.19	0.173	0.19	0.179	0.159	0.198	0.172	0.218	0.177	0.221	0.172	0.195	0.189	0.212	0.171	0.189	0.193	0.317	0.186	0.291	0.244	0.203	0.211	0.172	0.202	0.175	0.165	0.148	0.163	0.173	0.293	0.178	0.173	0.186	0.157
Mitral valve disease		0.374	0.608	0.164	0.558	0.496	0.536	0.576	0.571	0.174	0.453	0.431	0.609	0.614	0.569	0.585	0.567	0.439	0.515	0.474	0.45	0.512	0.525	0.468	0.45	0.522	0.533	0.549	0.533	0.52	0.503	0.171	0.503	0.525	0.45	0.53	0.51	0.55	0.534	0.573	0.543	0.579	0.571	0.472	0.41	0.552	0.467	0.487	0.532
Movement disorders	D009069	0.347	0.549	0.189	0.619	0.596	0.536	0.58	0.575	0.285	0.399	0.393	0.535	0.597	0.634	0.539	0.626	0.46	0.553	0.416	0.342	0.527	0.617	0.499	0.543	0.493	0.602	0.5	0.618	0.544	0.599	0.186	0.651	0.506	0.449	0.531	0.56	0.583	0.497	0.548	0.565	0.611	0.539	0.626	0.376	0.591	0.676	0.653	0.584
Moyamoya disease	D009072	0.298	0.581	0.213	0.685	0.596	0.541	0.568	0.556	0.286	0.439	0.439	0.552	0.563	0.593	0.557	0.566	0.431	0.485	0.413	0.387	0.537	0.56	0.614	0.456	0.55	0.6	0.555	0.583	0.58	0.559	0.26	0.548	0.529	0.462	0.565	0.529	0.578	0.541	0.545	0.556	0.567	0.569	0.518	0.47	0.609	0.517	0.598	0.542
Mucocutaneous lymph node syndrome	D009080	0.292	0.684	0.15	0.704	0.618	0.584	0.713	0.745	0.199	0.435	0.378	0.618	0.717	0.705	0.702	0.657	0.426	0.586	0.421	0.37	0.491	0.768	0.587	0.541	0.547	0.653	0.56	0.736	0.545	0.749	0.185	0.714	0.521	0.455	0.679	0.581	0.682	0.536	0.749	0.75	0.743	0.674	0.731	0.385	0.737	0.753	0.722	0.846
Mucopolysaccharidoses	D009083	0.396	0.468	0.281	0.458	0.517	0.489	0.438	0.465	0.391	0.464	0.345	0.434	0.448	0.511	0.433	0.486	0.437	0.414	0.465	0.399	0.525	0.468	0.47	0.446	0.502	0.483	0.474	0.466	0.517	0.461	0.296	0.468	0.572	0.493	0.482	0.481	0.483	0.459	0.47	0.454	0.445	0.441	0.431	0.483	0.46	0.429	0.442	0.428
Multiple endocrine neoplasia	D009377	0.338	0.553	0.201	0.586	0.585	0.625	0.563	0.567	0.275	0.427	0.353	0.523	0.595	0.624	0.537	0.572	0.454	0.546	0.439	0.371	0.516	0.577	0.519	0.52	0.519	0.565	0.577	0.615	0.56	0.591	0.23	0.597	0.627	0.497	0.557	0.566	0.569	0.532	0.564	0.559	0.571	0.536	0.551	0.411	0.579	0.542	0.579	0.551
Neoplasms, Second Primary	D016609	0.384	0.511	0.19	0.433	0.459	0.508	0.466	0.514	0.358	0.465	0.349	0.487	0.471	0.521	0.497	0.462	0.444	0.468	0.439	0.382	0.47	0.471	0.428	0.491	0.463	0.501	0.505	0.451	0.505	0.47	0.275	0.476	0.538	0.489	0.469	0.483	0.495	0.463	0.532	0.481	0.474	0.495	0.434	0.405	0.444	0.439	0.451	0.471
Multiple myeloma	D009101	0.319	0.7	0.163	0.692	0.648	0.627	0.731	0.729	0.198	0.42	0.354	0.623	0.702	0.691	0.695	0.676	0.451	0.6	0.431	0.386	0.533	0.803	0.561	0.554	0.525	0.67	0.545	0.741	0.563	0.749	0.178	0.773	0.527	0.485	0.644	0.582	0.719	0.514	0.738	0.773	0.788	0.71	0.791	0.392	0.742	0.756	0.756	0.815
Multiple sclerosis	D009103	0.305	0.685	0.156	0.682	0.624	0.587	0.71	0.737	0.195	0.408	0.349	0.619	0.682	0.689	0.705	0.657	0.471	0.61	0.404	0.366	0.516	0.834	0.532	0.555	0.51	0.649	0.525	0.74	0.544	0.752	0.168	0.786	0.509	0.482	0.634	0.566	0.74	0.493	0.721	0.77	0.773	0.656	0.822	0.374	0.721	0.759	0.764	0.845
Multiple system atrophy	D019578	0.418	0.679	0.199	0.524	0.459	0.57	0.627	0.622	0.173	0.431	0.366	0.682	0.625	0.514	0.569	0.547	0.433	0.649	0.472	0.436	0.49	0.498	0.463	0.448	0.544	0.479	0.536	0.504	0.478	0.479	0.151	0.5	0.536	0.412	0.523	0.48	0.512	0.46	0.574	0.563	0.588	0.567	0.461	0.375	0.533	0.461	0.481	0.514
Muscular atrophy	D009133	0.33	0.61	0.179	0.647	0.638	0.575	0.607	0.618	0.256	0.468	0.44	0.568	0.626	0.632	0.6	0.63	0.476	0.566	0.446	0.367	0.539	0.641	0.548	0.552	0.525	0.652	0.569	0.653	0.598	0.639	0.211	0.678	0.573	0.484	0.623	0.545	0.648	0.553	0.604	0.632	0.642	0.605	0.596	0.446	0.628	0.651	0.67	0.629
Muscular dystrophies	D009136	0.318	0.65	0.165	0.681	0.642	0.572	0.685	0.662	0.237	0.427	0.415	0.594	0.68	0.656	0.643	0.663	0.445	0.561	0.402	0.35	0.527	0.711	0.533	0.596	0.504	0.684	0.542	0.68	0.576	0.711	0.208	0.738	0.527	0.484	0.603	0.631	0.678	0.534	0.739	0.696	0.727	0.668	0.7	0.422	0.704	0.726	0.705	0.739
Muscular dystrophy		0.37	0.553	0.211	0.555	0.55	0.542	0.548	0.501	0.285	0.396	0.47	0.557	0.584	0.577	0.535	0.588	0.424	0.483	0.452	0.438	0.57	0.507	0.515	0.48	0.546	0.58	0.552	0.537	0.562	0.513	0.203	0.539	0.552	0.434	0.529	0.511	0.55	0.53	0.514	0.529	0.547	0.55	0.496	0.466	0.564	0.503	0.542	0.513
Myasthenia Gravis	D009157	0.33	0.662	0.152	0.566	0.574	0.584	0.648	0.671	0.247	0.471	0.332	0.581	0.638	0.604	0.652	0.564	0.461	0.565	0.437	0.387	0.503	0.608	0.499	0.538	0.53	0.582	0.557	0.61	0.524	0.659	0.23	0.575	0.584	0.533	0.652	0.56	0.695	0.51	0.666	0.657	0.634	0.644	0.532	0.387	0.605	0.548	0.541	0.658
Pneumonia, Mycoplasma	D011019	0.357	0.436	0.142	0.321	0.32	0.412	0.422	0.462	0.183	0.386	0.241	0.393	0.382	0.418	0.403	0.349	0.371	0.377	0.448	0.386	0.436	0.397	0.342	0.374	0.482	0.398	0.428	0.41	0.372	0.382	0.18	0.366	0.447	0.407	0.413	0.343	0.441	0.368	0.494	0.444	0.394	0.411	0.345	0.304	0.392	0.375	0.341	0.411
Mycoses	D009181	0.302	0.679	0.156	0.61	0.591	0.585	0.698	0.716	0.212	0.448	0.339	0.585	0.634	0.649	0.662	0.6	0.456	0.74	0.424	0.354	0.515	0.699	0.535	0.547	0.525	0.65	0.509	0.714	0.542	0.673	0.206	0.654	0.542	0.507	0.662	0.578	0.676	0.501	0.816	0.73	0.69	0.682	0.659	0.415	0.691	0.737	0.675	0.761
Mycosis fungoides	D009182	0.32	0.711	0.159	0.625	0.567	0.615	0.692	0.743	0.173	0.404	0.348	0.609	0.673	0.638	0.655	0.626	0.484	0.603	0.389	0.377	0.509	0.708	0.515	0.59	0.522	0.595	0.542	0.711	0.531	0.667	0.16	0.654	0.524	0.515	0.62	0.578	0.687	0.476	0.736	0.732	0.713	0.667	0.636	0.371	0.67	0.651	0.627	0.74
Primary Myelofibrosis	D055728	0.365	0.654	0.18	0.658	0.591	0.607	0.615	0.667	0.285	0.437	0.398	0.625	0.683	0.631	0.618	0.609	0.458	0.618	0.484	0.422	0.534	0.597	0.528	0.539	0.605	0.6	0.588	0.599	0.591	0.58	0.212	0.604	0.612	0.501	0.607	0.565	0.612	0.564	0.621	0.655	0.647	0.626	0.553	0.451	0.66	0.568	0.582	0.596
Myeloid metaplasia	D055728	0.402	0.577	0.182	0.498	0.441	0.56	0.53	0.59	0.174	0.472	0.394	0.556	0.579	0.487	0.503	0.505	0.389	0.602	0.535	0.504	0.465	0.454	0.456	0.431	0.564	0.45	0.525	0.474	0.483	0.455	0.159	0.464	0.528	0.402	0.515	0.461	0.472	0.498	0.543	0.536	0.511	0.539	0.421	0.402	0.503	0.416	0.441	0.467
Myeloproliferative Disorders	D009196	0.333	0.672	0.162	0.706	0.643	0.64	0.656	0.664	0.24	0.446	0.41	0.631	0.677	0.663	0.658	0.658	0.464	0.538	0.478	0.454	0.567	0.685	0.566	0.532	0.561	0.661	0.59	0.656	0.634	0.639	0.202	0.658	0.588	0.538	0.622	0.561	0.694	0.569	0.64	0.666	0.689	0.606	0.598	0.459	0.667	0.597	0.638	0.667
Muscular Diseases	D009135	0.326	0.592	0.188	0.666	0.625	0.556	0.632	0.621	0.217	0.426	0.418	0.559	0.631	0.699	0.575	0.684	0.464	0.575	0.413	0.345	0.499	0.724	0.525	0.55	0.502	0.627	0.529	0.705	0.554	0.701	0.168	0.777	0.502	0.431	0.572	0.56	0.636	0.509	0.589	0.644	0.691	0.574	0.748	0.391	0.647	0.736	0.773	0.688
Myotonic disorders	D020967	0.373	0.451	0.244	0.469	0.475	0.446	0.482	0.468	0.234	0.435	0.478	0.469	0.467	0.49	0.437	0.542	0.394	0.455	0.387	0.373	0.466	0.451	0.468	0.473	0.477	0.453	0.457	0.49	0.444	0.46	0.173	0.458	0.466	0.385	0.482	0.468	0.427	0.473	0.436	0.444	0.462	0.463	0.436	0.401	0.457	0.457	0.453	0.438
Narcolepsy	D009290	0.305	0.674	0.153	0.611	0.583	0.57	0.694	0.698	0.246	0.474	0.344	0.609	0.655	0.627	0.748	0.593	0.433	0.566	0.439	0.373	0.526	0.66	0.527	0.55	0.549	0.652	0.529	0.642	0.55	0.657	0.227	0.62	0.542	0.538	0.649	0.548	0.732	0.525	0.826	0.712	0.688	0.691	0.61	0.422	0.68	0.668	0.599	0.757
Nasopharyngeal Neoplasms	D009303	0.302	0.763	0.154	0.666	0.613	0.609	0.745	0.792	0.206	0.423	0.335	0.619	0.693	0.691	0.713	0.637	0.466	0.618	0.416	0.365	0.493	0.792	0.535	0.582	0.515	0.663	0.527	0.74	0.561	0.757	0.188	0.729	0.543	0.505	0.688	0.584	0.732	0.489	0.801	0.821	0.808	0.684	0.737	0.387	0.753	0.755	0.707	0.856
Head and Neck Neoplasms	D006258	0.345	0.586	0.214	0.578	0.598	0.591	0.602	0.576	0.22	0.396	0.352	0.577	0.624	0.608	0.562	0.62	0.427	0.538	0.416	0.396	0.528	0.579	0.52	0.464	0.52	0.579	0.591	0.585	0.538	0.587	0.199	0.615	0.579	0.438	0.552	0.509	0.594	0.472	0.581	0.572	0.585	0.557	0.543	0.4	0.593	0.537	0.573	0.56
Enterocolitis, Necrotizing	D020345	0.311	0.701	0.166	0.624	0.617	0.612	0.722	0.73	0.223	0.471	0.34	0.648	0.674	0.672	0.679	0.617	0.46	0.569	0.438	0.386	0.547	0.682	0.561	0.573	0.574	0.684	0.566	0.706	0.582	0.702	0.223	0.638	0.576	0.541	0.643	0.579	0.719	0.536	0.855	0.743	0.708	0.712	0.636	0.419	0.705	0.706	0.62	0.765
Neoplasm metastasis	D009362	0.318	0.647	0.173	0.69	0.639	0.576	0.696	0.67	0.217	0.393	0.357	0.596	0.662	0.68	0.656	0.666	0.446	0.586	0.415	0.364	0.499	0.83	0.547	0.526	0.504	0.648	0.521	0.734	0.544	0.753	0.174	0.791	0.516	0.458	0.618	0.583	0.69	0.505	0.64	0.727	0.755	0.631	0.85	0.399	0.714	0.748	0.778	0.799
Nephritis	D009393	0.331	0.729	0.156	0.671	0.593	0.643	0.698	0.7	0.221	0.439	0.431	0.646	0.831	0.613	0.643	0.637	0.442	0.574	0.489	0.429	0.531	0.614	0.532	0.515	0.578	0.605	0.59	0.616	0.586	0.6	0.174	0.602	0.574	0.527	0.651	0.556	0.631	0.536	0.643	0.653	0.699	0.654	0.57	0.477	0.646	0.559	0.622	0.632
Wilms Tumor	D009396	0.324	0.425	0.237	0.475	0.514	0.465	0.404	0.406	0.433	0.416	0.366	0.414	0.449	0.46	0.415	0.45	0.345	0.36	0.368	0.319	0.456	0.422	0.43	0.453	0.467	0.458	0.477	0.42	0.534	0.414	0.379	0.437	0.529	0.508	0.451	0.469	0.434	0.471	0.421	0.42	0.424	0.428	0.4	0.541	0.445	0.393	0.434	0.377
Nephrosis	D009401	0.302	0.682	0.167	0.678	0.631	0.572	0.733	0.701	0.215	0.434	0.344	0.606	0.674	0.681	0.688	0.659	0.452	0.728	0.414	0.35	0.518	0.745	0.573	0.532	0.517	0.68	0.518	0.725	0.546	0.721	0.199	0.731	0.514	0.471	0.656	0.589	0.716	0.511	0.768	0.766	0.726	0.722	0.74	0.409	0.737	0.769	0.736	0.777
Nervous system diseases	D009422	0.362	0.659	0.182	0.632	0.6	0.611	0.681	0.653	0.226	0.472	0.393	0.635	0.647	0.645	0.626	0.638	0.485	0.595	0.456	0.377	0.559	0.654	0.526	0.554	0.52	0.618	0.544	0.67	0.576	0.642	0.183	0.669	0.538	0.445	0.583	0.566	0.63	0.505	0.641	0.646	0.681	0.63	0.632	0.399	0.638	0.705	0.661	0.666
Nervous System Neoplasms	D009423	0.368	0.649	0.193	0.647	0.596	0.603	0.645	0.63	0.263	0.454	0.379	0.628	0.656	0.657	0.634	0.652	0.452	0.592	0.486	0.44	0.543	0.629	0.579	0.552	0.553	0.76	0.589	0.634	0.606	0.68	0.23	0.634	0.557	0.495	0.636	0.574	0.652	0.594	0.633	0.639	0.665	0.66	0.604	0.432	0.656	0.609	0.618	0.621
Neurilemmoma	D009442	0.322	0.489	0.169	0.452	0.485	0.48	0.495	0.488	0.223	0.428	0.35	0.487	0.502	0.507	0.47	0.497	0.411	0.522	0.423	0.371	0.473	0.454	0.434	0.447	0.455	0.515	0.505	0.458	0.458	0.471	0.212	0.466	0.498	0.438	0.477	0.461	0.466	0.488	0.511	0.46	0.471	0.528	0.442	0.403	0.46	0.443	0.466	0.445
Neuritis	D009443	0.408	0.619	0.2	0.6	0.535	0.583	0.613	0.611	0.236	0.527	0.443	0.603	0.628	0.604	0.579	0.594	0.463	0.556	0.492	0.421	0.618	0.56	0.536	0.543	0.6	0.58	0.607	0.596	0.591	0.546	0.19	0.563	0.584	0.46	0.61	0.548	0.585	0.521	0.649	0.58	0.582	0.651	0.511	0.428	0.605	0.535	0.534	0.576
Neuroblastoma	D009447	0.333	0.67	0.174	0.705	0.652	0.602	0.697	0.7	0.227	0.45	0.392	0.574	0.688	0.697	0.655	0.688	0.456	0.596	0.449	0.38	0.524	0.775	0.548	0.569	0.528	0.654	0.549	0.761	0.594	0.74	0.18	0.802	0.547	0.487	0.625	0.597	0.722	0.505	0.647	0.706	0.744	0.638	0.772	0.421	0.694	0.746	0.778	0.777
Neurodegenerative Diseases	D019636	0.322	0.576	0.176	0.645	0.634	0.549	0.611	0.601	0.247	0.392	0.357	0.548	0.624	0.661	0.574	0.639	0.451	0.633	0.405	0.346	0.544	0.713	0.524	0.514	0.48	0.65	0.492	0.692	0.563	0.677	0.188	0.753	0.496	0.444	0.561	0.552	0.64	0.496	0.586	0.622	0.663	0.561	0.762	0.388	0.634	0.794	0.816	0.67
Neuroendocrine tumors	D018358	0.313	0.758	0.173	0.609	0.569	0.612	0.615	0.644	0.197	0.44	0.397	0.577	0.595	0.592	0.604	0.584	0.466	0.571	0.474	0.377	0.467	0.606	0.562	0.531	0.543	0.605	0.519	0.638	0.54	0.653	0.197	0.543	0.547	0.473	0.772	0.56	0.611	0.531	0.648	0.69	0.675	0.613	0.549	0.411	0.71	0.546	0.547	0.652
Neurofibromatoses	D017253	0.32	0.635	0.172	0.663	0.662	0.588	0.623	0.61	0.228	0.443	0.413	0.625	0.677	0.637	0.641	0.664	0.479	0.612	0.481	0.423	0.525	0.635	0.55	0.489	0.529	0.635	0.581	0.639	0.604	0.625	0.189	0.655	0.558	0.485	0.641	0.552	0.639	0.571	0.593	0.622	0.713	0.607	0.607	0.463	0.639	0.608	0.653	0.632
Neuropathy		0.338	0.565	0.203	0.603	0.621	0.582	0.584	0.611	0.245	0.441	0.387	0.554	0.578	0.638	0.573	0.637	0.49	0.557	0.41	0.327	0.534	0.627	0.531	0.534	0.493	0.603	0.496	0.632	0.546	0.637	0.186	0.633	0.512	0.459	0.555	0.579	0.619	0.487	0.581	0.595	0.625	0.548	0.617	0.425	0.598	0.65	0.641	0.635
Neurotic disorders	D009497	0.316	0.581	0.163	0.584	0.56	0.554	0.553	0.605	0.193	0.471	0.385	0.524	0.583	0.574	0.526	0.549	0.418	0.566	0.478	0.355	0.476	0.554	0.495	0.503	0.532	0.567	0.496	0.583	0.523	0.564	0.163	0.562	0.521	0.457	0.594	0.526	0.56	0.548	0.557	0.581	0.588	0.522	0.526	0.397	0.574	0.551	0.559	0.553
Neutropenia	D009503	0.336	0.624	0.185	0.596	0.582	0.64	0.613	0.714	0.252	0.452	0.399	0.571	0.627	0.632	0.698	0.587	0.434	0.542	0.446	0.404	0.547	0.622	0.538	0.525	0.56	0.607	0.583	0.602	0.557	0.627	0.249	0.583	0.558	0.522	0.614	0.561	0.635	0.555	0.669	0.641	0.663	0.632	0.554	0.407	0.634	0.572	0.577	0.642
Nevus, Pigmented	D009508	0.361	0.527	0.237	0.553	0.505	0.522	0.51	0.509	0.305	0.465	0.396	0.537	0.541	0.565	0.517	0.553	0.388	0.494	0.486	0.418	0.49	0.513	0.572	0.472	0.513	0.537	0.544	0.535	0.532	0.494	0.24	0.492	0.56	0.428	0.528	0.533	0.501	0.508	0.51	0.487	0.507	0.52	0.467	0.426	0.531	0.482	0.487	0.49
Obesity	D009765	0.3	0.623	0.174	0.686	0.65	0.548	0.658	0.65	0.202	0.403	0.359	0.576	0.641	0.667	0.636	0.652	0.417	0.599	0.412	0.352	0.476	0.811	0.553	0.51	0.488	0.667	0.504	0.728	0.524	0.759	0.174	0.8	0.496	0.439	0.626	0.571	0.694	0.493	0.625	0.698	0.739	0.588	0.875	0.398	0.708	0.771	0.794	0.791
Obsessive-Compulsive Disorder	D009771	0.343	0.751	0.149	0.639	0.578	0.634	0.639	0.653	0.193	0.482	0.44	0.616	0.631	0.603	0.629	0.607	0.526	0.595	0.455	0.357	0.498	0.637	0.519	0.536	0.533	0.597	0.528	0.638	0.564	0.652	0.159	0.595	0.537	0.461	0.723	0.569	0.622	0.525	0.645	0.685	0.701	0.622	0.581	0.435	0.69	0.597	0.601	0.669
Oligospermia	D009845	0.347	0.556	0.282	0.607	0.761	0.605	0.565	0.576	0.305	0.464	0.393	0.556	0.59	0.609	0.565	0.593	0.426	0.523	0.48	0.395	0.521	0.599	0.574	0.515	0.53	0.623	0.572	0.6	0.563	0.631	0.254	0.589	0.584	0.51	0.596	0.617	0.594	0.582	0.537	0.598	0.594	0.536	0.561	0.463	0.62	0.55	0.595	0.571
Optic atrophy	D009896	0.345	0.556	0.184	0.496	0.504	0.532	0.555	0.518	0.266	0.526	0.358	0.57	0.637	0.563	0.564	0.547	0.348	0.489	0.505	0.442	0.49	0.497	0.508	0.48	0.528	0.591	0.592	0.527	0.536	0.523	0.287	0.527	0.531	0.458	0.563	0.452	0.562	0.507	0.57	0.525	0.535	0.559	0.464	0.466	0.532	0.474	0.479	0.505
Mouth Neoplasms	D009062	0.308	0.661	0.177	0.692	0.656	0.584	0.711	0.697	0.216	0.419	0.347	0.605	0.694	0.718	0.681	0.69	0.439	0.604	0.405	0.364	0.498	0.82	0.541	0.558	0.511	0.679	0.567	0.746	0.561	0.785	0.196	0.817	0.542	0.483	0.626	0.587	0.716	0.507	0.68	0.777	0.75	0.664	0.818	0.39	0.738	0.744	0.78	0.793
Osteitis deformans	D010001	0.373	0.616	0.209	0.587	0.585	0.574	0.616	0.603	0.253	0.51	0.387	0.626	0.63	0.708	0.608	0.632	0.455	0.565	0.507	0.439	0.526	0.586	0.593	0.548	0.549	0.655	0.625	0.61	0.595	0.597	0.241	0.591	0.601	0.451	0.628	0.576	0.625	0.59	0.612	0.592	0.607	0.607	0.56	0.448	0.663	0.558	0.574	0.584
Osteomyelitis	D010019	0.358	0.608	0.177	0.615	0.576	0.574	0.588	0.626	0.259	0.474	0.393	0.571	0.591	0.608	0.591	0.617	0.495	0.522	0.472	0.414	0.61	0.633	0.56	0.551	0.585	0.607	0.565	0.631	0.613	0.578	0.202	0.623	0.6	0.48	0.568	0.587	0.627	0.555	0.619	0.613	0.61	0.595	0.555	0.408	0.611	0.581	0.581	0.606
Osteoporosis	D010024	0.318	0.683	0.175	0.769	0.687	0.591	0.706	0.688	0.222	0.443	0.387	0.652	0.711	0.705	0.701	0.701	0.438	0.594	0.448	0.396	0.513	0.782	0.577	0.546	0.537	0.723	0.571	0.736	0.578	0.738	0.19	0.763	0.555	0.5	0.656	0.592	0.761	0.565	0.655	0.716	0.791	0.646	0.769	0.437	0.776	0.719	0.752	0.775
Osteosarcoma	D012516	0.361	0.68	0.194	0.677	0.663	0.638	0.662	0.679	0.252	0.445	0.381	0.642	0.712	0.706	0.678	0.72	0.432	0.63	0.474	0.415	0.521	0.686	0.568	0.55	0.548	0.72	0.597	0.667	0.584	0.681	0.199	0.716	0.579	0.494	0.612	0.586	0.729	0.558	0.647	0.682	0.761	0.635	0.671	0.445	0.679	0.642	0.692	0.67
Otitis media	D010033	0.333	0.711	0.164	0.648	0.586	0.617	0.784	0.748	0.239	0.458	0.365	0.627	0.693	0.659	0.692	0.625	0.442	0.64	0.45	0.387	0.528	0.688	0.55	0.566	0.555	0.667	0.561	0.67	0.578	0.677	0.224	0.662	0.563	0.514	0.662	0.574	0.692	0.542	0.853	0.805	0.72	0.795	0.646	0.431	0.753	0.687	0.634	0.749
Ovarian Neoplasms	D010051	0.313	0.643	0.181	0.669	0.649	0.576	0.685	0.659	0.222	0.388	0.351	0.585	0.658	0.708	0.653	0.656	0.436	0.627	0.415	0.351	0.487	0.823	0.551	0.511	0.488	0.667	0.51	0.745	0.53	0.778	0.182	0.798	0.506	0.452	0.634	0.584	0.697	0.497	0.626	0.715	0.758	0.603	0.846	0.384	0.724	0.757	0.805	0.774
Ovarian diseases	D010049	0.292	0.634	0.178	0.703	0.69	0.629	0.637	0.641	0.242	0.452	0.398	0.596	0.698	0.685	0.641	0.653	0.434	0.541	0.436	0.362	0.504	0.695	0.571	0.533	0.544	0.678	0.585	0.675	0.591	0.714	0.201	0.67	0.567	0.542	0.63	0.586	0.664	0.554	0.636	0.703	0.674	0.624	0.638	0.456	0.702	0.627	0.673	0.693
Ovarian failure		0.316	0.568	0.229	0.612	0.686	0.608	0.571	0.557	0.321	0.476	0.408	0.565	0.628	0.611	0.582	0.584	0.402	0.494	0.484	0.396	0.526	0.569	0.515	0.513	0.534	0.624	0.601	0.572	0.575	0.592	0.26	0.576	0.597	0.561	0.605	0.547	0.599	0.572	0.567	0.572	0.583	0.562	0.525	0.488	0.585	0.524	0.563	0.549
Ovarian Neoplasms	D010051	0.327	0.693	0.174	0.654	0.622	0.626	0.725	0.741	0.243	0.455	0.359	0.625	0.691	0.712	0.682	0.656	0.434	0.634	0.446	0.38	0.53	0.718	0.555	0.568	0.59	0.664	0.568	0.693	0.565	0.705	0.213	0.705	0.585	0.494	0.633	0.587	0.688	0.524	0.8	0.75	0.729	0.702	0.67	0.4	0.708	0.718	0.687	0.76
Overnutrition	D044343	0.328	0.556	0.198	0.557	0.596	0.52	0.539	0.551	0.214	0.433	0.417	0.56	0.605	0.57	0.588	0.611	0.418	0.58	0.427	0.372	0.494	0.583	0.505	0.556	0.476	0.58	0.505	0.572	0.524	0.585	0.178	0.6	0.508	0.403	0.559	0.538	0.562	0.547	0.536	0.539	0.589	0.516	0.562	0.415	0.553	0.571	0.572	0.551
Perivascular Epithelioid Cell Neoplasms	D054973	0.351	0.426	0.141	0.454	0.392	0.438	0.427	0.435	0.189	0.4	0.354	0.439	0.463	0.425	0.43	0.43	0.387	0.427	0.496	0.449	0.438	0.388	0.396	0.412	0.404	0.431	0.47	0.393	0.513	0.38	0.168	0.404	0.444	0.428	0.4	0.386	0.427	0.455	0.417	0.416	0.437	0.439	0.379	0.415	0.43	0.374	0.387	0.395
Keratoderma, Palmoplantar	D007645	0.415	0.435	0.185	0.48	0.442	0.461	0.444	0.407	0.218	0.44	0.512	0.469	0.463	0.466	0.427	0.524	0.438	0.42	0.478	0.382	0.473	0.428	0.494	0.457	0.462	0.453	0.476	0.464	0.538	0.424	0.144	0.438	0.49	0.401	0.443	0.465	0.444	0.488	0.429	0.424	0.467	0.455	0.414	0.434	0.459	0.384	0.433	0.408
Pancreatic Neoplasms	D010190	0.316	0.663	0.171	0.7	0.675	0.598	0.687	0.697	0.208	0.416	0.362	0.615	0.688	0.714	0.685	0.681	0.445	0.608	0.434	0.375	0.517	0.838	0.582	0.533	0.516	0.67	0.544	0.754	0.556	0.757	0.179	0.786	0.529	0.467	0.634	0.596	0.698	0.53	0.689	0.728	0.774	0.633	0.825	0.409	0.716	0.768	0.771	0.798
Pancreas diseases	D010182	0.303	0.635	0.198	0.685	0.64	0.569	0.662	0.655	0.254	0.455	0.352	0.595	0.641	0.669	0.696	0.654	0.406	0.606	0.422	0.375	0.519	0.712	0.586	0.57	0.514	0.828	0.591	0.688	0.594	0.751	0.229	0.708	0.556	0.496	0.673	0.583	0.801	0.547	0.652	0.705	0.696	0.639	0.69	0.424	0.687	0.685	0.692	0.703
Pancreatitis	D010195	0.312	0.69	0.172	0.71	0.656	0.588	0.722	0.732	0.204	0.427	0.366	0.626	0.695	0.705	0.676	0.69	0.447	0.624	0.423	0.371	0.51	0.787	0.553	0.553	0.528	0.679	0.567	0.77	0.556	0.753	0.186	0.786	0.553	0.473	0.655	0.588	0.719	0.511	0.743	0.738	0.781	0.66	0.782	0.402	0.747	0.801	0.796	0.817
Panic disorder	D016584	0.334	0.561	0.203	0.628	0.644	0.557	0.599	0.575	0.255	0.529	0.436	0.552	0.6	0.61	0.569	0.611	0.417	0.597	0.531	0.36	0.526	0.577	0.549	0.526	0.528	0.61	0.576	0.613	0.566	0.582	0.22	0.578	0.571	0.481	0.603	0.6	0.558	0.552	0.557	0.56	0.582	0.587	0.546	0.485	0.602	0.572	0.578	0.555
Adenocarcinoma, Papillary	D000231	0.347	0.623	0.182	0.573	0.557	0.585	0.615	0.612	0.213	0.457	0.362	0.623	0.693	0.613	0.613	0.605	0.387	0.541	0.48	0.416	0.528	0.609	0.556	0.552	0.543	0.63	0.589	0.601	0.562	0.581	0.211	0.573	0.55	0.527	0.61	0.523	0.624	0.538	0.642	0.609	0.62	0.62	0.541	0.441	0.612	0.543	0.543	0.593
Papillary cancer		0.299	0.554	0.165	0.621	0.577	0.543	0.528	0.538	0.219	0.432	0.464	0.545	0.604	0.574	0.527	0.575	0.482	0.501	0.466	0.35	0.489	0.538	0.531	0.5	0.53	0.549	0.577	0.585	0.604	0.546	0.189	0.56	0.537	0.462	0.548	0.502	0.551	0.536	0.535	0.541	0.567	0.522	0.522	0.531	0.574	0.525	0.551	0.526
Papillomavirus Infections	D030361	0.366	0.559	0.191	0.524	0.502	0.53	0.532	0.538	0.278	0.505	0.337	0.548	0.574	0.561	0.542	0.528	0.376	0.486	0.503	0.477	0.482	0.508	0.505	0.492	0.545	0.569	0.736	0.51	0.603	0.505	0.267	0.531	0.706	0.448	0.549	0.458	0.574	0.527	0.567	0.527	0.531	0.545	0.464	0.455	0.521	0.477	0.492	0.503
Parasitic diseases	D010272	0.398	0.453	0.225	0.369	0.432	0.476	0.432	0.437	0.424	0.382	0.276	0.417	0.424	0.461	0.419	0.421	0.399	0.397	0.48	0.496	0.511	0.411	0.409	0.414	0.459	0.447	0.474	0.402	0.44	0.409	0.255	0.431	0.529	0.455	0.439	0.414	0.44	0.41	0.453	0.419	0.406	0.406	0.376	0.381	0.411	0.393	0.396	0.396
Parkinson disease	D010300	0.31	0.604	0.185	0.673	0.649	0.568	0.672	0.661	0.237	0.408	0.347	0.562	0.636	0.682	0.633	0.662	0.426	0.59	0.392	0.342	0.499	0.809	0.552	0.535	0.489	0.693	0.523	0.724	0.542	0.765	0.194	0.799	0.516	0.455	0.607	0.579	0.683	0.486	0.64	0.72	0.727	0.618	0.834	0.373	0.709	0.779	0.798	0.768
Pelvic inflammatory disease	D000292	0.336	0.571	0.178	0.521	0.521	0.542	0.579	0.672	0.27	0.383	0.358	0.543	0.558	0.597	0.647	0.539	0.435	0.537	0.433	0.374	0.519	0.58	0.49	0.52	0.476	0.578	0.528	0.556	0.506	0.573	0.22	0.562	0.527	0.469	0.56	0.507	0.589	0.485	0.623	0.595	0.613	0.579	0.532	0.345	0.573	0.612	0.538	0.608
Penile diseases	D010409	0.382	0.848	0.171	0.648	0.581	0.678	0.727	0.736	0.212	0.459	0.405	0.77	0.787	0.644	0.731	0.671	0.437	0.618	0.479	0.465	0.517	0.632	0.57	0.569	0.57	0.622	0.684	0.644	0.575	0.622	0.208	0.625	0.598	0.48	0.661	0.589	0.631	0.557	0.679	0.669	0.723	0.697	0.586	0.436	0.663	0.611	0.632	0.645
Esophagitis, Peptic	D004942	0.375	0.738	0.227	0.625	0.62	0.696	0.701	0.747	0.246	0.453	0.369	0.629	0.722	0.646	0.613	0.658	0.416	0.65	0.454	0.426	0.548	0.622	0.523	0.547	0.574	0.608	0.606	0.631	0.569	0.641	0.222	0.635	0.595	0.533	0.62	0.583	0.625	0.518	0.66	0.68	0.703	0.659	0.583	0.427	0.646	0.589	0.648	0.63
Peptic Ulcer	D010437	0.311	0.692	0.166	0.682	0.615	0.613	0.702	0.712	0.206	0.436	0.38	0.637	0.685	0.67	0.687	0.646	0.462	0.6	0.436	0.393	0.531	0.705	0.594	0.521	0.578	0.633	0.563	0.708	0.55	0.715	0.181	0.663	0.552	0.48	0.651	0.596	0.734	0.547	0.676	0.709	0.713	0.628	0.643	0.407	0.696	0.631	0.646	0.739
Periodontal diseases	D010510	0.342	0.711	0.163	0.631	0.581	0.609	0.679	0.666	0.228	0.425	0.388	0.658	0.678	0.694	0.666	0.658	0.45	0.609	0.433	0.418	0.538	0.651	0.576	0.507	0.574	0.64	0.586	0.663	0.543	0.636	0.179	0.604	0.572	0.457	0.647	0.619	0.638	0.548	0.678	0.672	0.686	0.676	0.588	0.379	0.675	0.625	0.614	0.66
Periodontitis	D010518	0.308	0.671	0.166	0.667	0.634	0.58	0.743	0.753	0.199	0.418	0.351	0.604	0.671	0.706	0.707	0.65	0.471	0.594	0.399	0.37	0.51	0.812	0.549	0.551	0.531	0.663	0.537	0.762	0.54	0.75	0.18	0.753	0.522	0.483	0.64	0.583	0.716	0.517	0.747	0.794	0.765	0.676	0.771	0.375	0.758	0.774	0.743	0.843
Nerve Sheath Neoplasms	D018317	0.3	0.487	0.181	0.566	0.48	0.468	0.47	0.413	0.244	0.402	0.404	0.495	0.515	0.476	0.462	0.454	0.359	0.429	0.463	0.397	0.445	0.413	0.441	0.377	0.451	0.485	0.547	0.429	0.556	0.418	0.23	0.431	0.51	0.442	0.475	0.415	0.466	0.492	0.447	0.437	0.478	0.473	0.392	0.482	0.515	0.385	0.44	0.41
Nerve Sheath Neoplasms	D018317	0.315	0.499	0.164	0.525	0.459	0.455	0.49	0.441	0.207	0.429	0.481	0.53	0.52	0.495	0.487	0.533	0.442	0.459	0.501	0.408	0.449	0.443	0.463	0.396	0.475	0.495	0.531	0.49	0.581	0.433	0.16	0.455	0.504	0.424	0.495	0.438	0.486	0.5	0.439	0.434	0.562	0.493	0.423	0.469	0.497	0.421	0.459	0.438
Whooping Cough	D014917	0.44	0.694	0.184	0.521	0.459	0.573	0.628	0.575	0.172	0.397	0.379	0.721	0.619	0.531	0.628	0.573	0.477	0.528	0.429	0.443	0.513	0.515	0.496	0.466	0.499	0.506	0.492	0.558	0.474	0.504	0.15	0.509	0.53	0.408	0.528	0.525	0.534	0.455	0.562	0.555	0.602	0.583	0.485	0.355	0.549	0.486	0.49	0.543
Child Development Disorders, Pervasive	D002659	0.364	0.6	0.218	0.626	0.632	0.549	0.611	0.587	0.245	0.451	0.415	0.671	0.62	0.606	0.609	0.623	0.474	0.574	0.471	0.403	0.521	0.591	0.576	0.497	0.514	0.629	0.589	0.636	0.59	0.605	0.185	0.602	0.573	0.461	0.591	0.538	0.624	0.554	0.58	0.577	0.623	0.57	0.571	0.447	0.605	0.561	0.603	0.587
Phobic Disorders	D010698	0.386	0.571	0.194	0.589	0.602	0.555	0.539	0.556	0.298	0.551	0.437	0.568	0.574	0.568	0.549	0.56	0.424	0.508	0.552	0.433	0.56	0.549	0.542	0.52	0.546	0.592	0.559	0.571	0.595	0.547	0.273	0.551	0.603	0.492	0.577	0.553	0.553	0.598	0.543	0.541	0.569	0.562	0.503	0.512	0.576	0.512	0.543	0.524
Pick Disease of the Brain	D020774	0.366	0.394	0.257	0.408	0.368	0.438	0.385	0.383	0.172	0.443	0.409	0.401	0.403	0.4	0.36	0.405	0.378	0.414	0.529	0.447	0.453	0.355	0.394	0.314	0.452	0.377	0.4	0.398	0.44	0.351	0.145	0.367	0.392	0.332	0.405	0.385	0.369	0.418	0.37	0.365	0.39	0.384	0.349	0.454	0.395	0.346	0.363	0.354
Pilomatrixoma	D018296	0.153	0.116	0.073	0.167	0.131	0.11	0.11	0.097	0.064	0.109	0.2	0.138	0.144	0.106	0.112	0.137	0.127	0.101	0.125	0.126	0.102	0.101	0.11	0.108	0.161	0.094	0.105	0.123	0.165	0.09	0.066	0.104	0.107	0.097	0.1	0.103	0.105	0.154	0.079	0.1	0.126	0.1	0.106	0.174	0.122	0.091	0.117	0.096
Pituitary Neoplasms	D010911	0.313	0.743	0.199	0.64	0.638	0.714	0.659	0.699	0.225	0.435	0.351	0.586	0.633	0.682	0.661	0.625	0.453	0.571	0.437	0.383	0.495	0.716	0.566	0.548	0.565	0.71	0.536	0.725	0.559	0.751	0.202	0.651	0.553	0.558	0.729	0.595	0.73	0.518	0.691	0.757	0.726	0.629	0.646	0.411	0.738	0.64	0.657	0.739
Placenta diseases	D010922	0.282	0.417	0.172	0.421	0.377	0.395	0.4	0.378	0.29	0.371	0.31	0.402	0.439	0.408	0.402	0.379	0.257	0.361	0.45	0.449	0.383	0.358	0.377	0.343	0.36	0.398	0.519	0.362	0.447	0.358	0.39	0.365	0.535	0.401	0.42	0.347	0.392	0.423	0.405	0.384	0.388	0.414	0.328	0.401	0.393	0.324	0.349	0.351
Pneumoconiosis	D011009	0.402	0.548	0.204	0.493	0.473	0.514	0.526	0.502	0.297	0.5	0.34	0.542	0.571	0.539	0.518	0.517	0.36	0.46	0.546	0.515	0.511	0.468	0.498	0.434	0.569	0.541	0.609	0.498	0.542	0.485	0.285	0.479	0.57	0.449	0.518	0.446	0.531	0.512	0.553	0.488	0.501	0.547	0.443	0.445	0.511	0.462	0.467	0.477
Arthritis	D001168	0.294	0.656	0.16	0.739	0.634	0.568	0.679	0.697	0.206	0.413	0.366	0.594	0.683	0.692	0.665	0.683	0.427	0.59	0.404	0.359	0.488	0.794	0.538	0.54	0.509	0.678	0.545	0.752	0.546	0.742	0.182	0.787	0.524	0.466	0.636	0.568	0.739	0.497	0.66	0.722	0.746	0.619	0.809	0.404	0.739	0.751	0.766	0.792
Polycystic Kidney Diseases	D007690	0.318	0.627	0.163	0.679	0.677	0.592	0.643	0.643	0.219	0.452	0.41	0.616	0.69	0.683	0.642	0.675	0.456	0.738	0.47	0.372	0.527	0.686	0.565	0.547	0.524	0.736	0.549	0.669	0.601	0.672	0.175	0.693	0.552	0.472	0.622	0.601	0.719	0.568	0.627	0.669	0.736	0.619	0.683	0.447	0.687	0.677	0.719	0.665
Polycystic Ovary Syndrome	D011085	0.32	0.684	0.185	0.695	0.668	0.596	0.697	0.678	0.236	0.423	0.352	0.597	0.679	0.688	0.663	0.691	0.418	0.587	0.421	0.375	0.508	0.82	0.571	0.541	0.521	0.737	0.545	0.74	0.552	0.793	0.205	0.793	0.531	0.483	0.677	0.601	0.719	0.522	0.699	0.74	0.768	0.639	0.803	0.397	0.759	0.762	0.764	0.787
Polycythemia	D011086	0.327	0.664	0.181	0.72	0.65	0.615	0.676	0.669	0.257	0.487	0.408	0.622	0.678	0.724	0.651	0.654	0.43	0.569	0.481	0.424	0.548	0.717	0.641	0.578	0.564	0.775	0.584	0.7	0.586	0.706	0.226	0.673	0.578	0.481	0.678	0.601	0.752	0.586	0.65	0.679	0.749	0.648	0.651	0.421	0.742	0.654	0.671	0.727
Polymyositis	D017285	0.333	0.715	0.163	0.664	0.589	0.612	0.794	0.749	0.202	0.441	0.38	0.617	0.711	0.669	0.679	0.64	0.465	0.61	0.426	0.38	0.539	0.705	0.551	0.572	0.563	0.642	0.58	0.699	0.558	0.683	0.192	0.67	0.539	0.479	0.648	0.58	0.69	0.518	0.765	0.78	0.727	0.809	0.659	0.383	0.748	0.672	0.646	0.743
Polyneuropathies	D011115	0.291	0.621	0.176	0.667	0.64	0.583	0.629	0.621	0.23	0.391	0.359	0.598	0.643	0.654	0.61	0.654	0.421	0.612	0.399	0.358	0.498	0.67	0.56	0.491	0.496	0.651	0.538	0.669	0.565	0.662	0.196	0.698	0.509	0.457	0.615	0.597	0.65	0.524	0.605	0.635	0.663	0.589	0.681	0.411	0.661	0.748	0.745	0.652
Porcine reproductive and respiratory syndrome	D019318	0.323	0.603	0.145	0.497	0.471	0.564	0.597	0.691	0.193	0.427	0.322	0.492	0.522	0.561	0.544	0.499	0.482	0.511	0.408	0.367	0.532	0.587	0.485	0.538	0.624	0.546	0.466	0.636	0.491	0.562	0.18	0.523	0.563	0.542	0.567	0.507	0.611	0.451	0.671	0.651	0.565	0.581	0.495	0.374	0.572	0.561	0.503	0.607
Pre-Eclampsia	D011225	0.301	0.657	0.162	0.732	0.646	0.571	0.695	0.713	0.2	0.423	0.363	0.61	0.676	0.7	0.678	0.671	0.447	0.611	0.421	0.361	0.498	0.835	0.554	0.55	0.518	0.672	0.542	0.755	0.554	0.754	0.177	0.792	0.532	0.466	0.633	0.567	0.711	0.524	0.655	0.739	0.766	0.622	0.809	0.399	0.728	0.757	0.803	0.802
Premature birth	D047928	0.292	0.666	0.177	0.648	0.607	0.57	0.774	0.694	0.213	0.451	0.357	0.576	0.644	0.659	0.656	0.634	0.425	0.615	0.45	0.348	0.497	0.739	0.625	0.565	0.528	0.677	0.543	0.76	0.533	0.724	0.202	0.664	0.548	0.489	0.71	0.597	0.697	0.509	0.719	0.76	0.712	0.729	0.683	0.397	0.771	0.708	0.654	0.782
Liver Cirrhosis, Biliary	D008105	0.316	0.688	0.173	0.68	0.641	0.592	0.706	0.712	0.213	0.434	0.365	0.628	0.685	0.68	0.7	0.685	0.448	0.613	0.42	0.379	0.516	0.779	0.549	0.617	0.522	0.681	0.545	0.753	0.565	0.728	0.19	0.748	0.543	0.533	0.635	0.6	0.743	0.508	0.691	0.727	0.768	0.652	0.745	0.378	0.71	0.757	0.732	0.789
Hyperparathyroidism, Primary	D049950	0.363	0.656	0.165	0.66	0.587	0.582	0.663	0.627	0.202	0.469	0.444	0.679	0.771	0.639	0.677	0.676	0.416	0.562	0.482	0.423	0.504	0.619	0.554	0.561	0.531	0.616	0.604	0.673	0.57	0.647	0.193	0.652	0.568	0.436	0.612	0.585	0.619	0.55	0.611	0.615	0.677	0.616	0.584	0.405	0.654	0.586	0.604	0.631
Neoplasms, Unknown Primary	D009382	0.317	0.624	0.168	0.702	0.661	0.578	0.65	0.63	0.258	0.408	0.401	0.591	0.671	0.729	0.618	0.67	0.448	0.573	0.455	0.371	0.515	0.724	0.578	0.532	0.518	0.711	0.552	0.707	0.585	0.701	0.19	0.733	0.54	0.469	0.618	0.579	0.706	0.537	0.59	0.661	0.738	0.592	0.715	0.43	0.71	0.689	0.74	0.684
Prion diseases	D017096	0.347	0.557	0.209	0.531	0.546	0.543	0.571	0.558	0.229	0.385	0.382	0.531	0.514	0.586	0.554	0.556	0.688	0.514	0.384	0.385	0.538	0.554	0.52	0.513	0.476	0.551	0.466	0.582	0.526	0.567	0.173	0.567	0.5	0.455	0.551	0.545	0.582	0.467	0.552	0.558	0.561	0.542	0.537	0.392	0.556	0.567	0.568	0.565
Prostatic Neoplasms	D011471	0.303	0.606	0.178	0.671	0.638	0.549	0.634	0.638	0.212	0.391	0.347	0.555	0.628	0.671	0.616	0.648	0.42	0.577	0.397	0.351	0.478	0.812	0.528	0.51	0.482	0.652	0.5	0.718	0.522	0.749	0.178	0.808	0.491	0.453	0.591	0.561	0.679	0.487	0.611	0.682	0.718	0.575	0.893	0.388	0.678	0.746	0.798	0.77
Protein deficiency	D011488	0.345	0.27	0.404	0.258	0.314	0.324	0.279	0.274	0.274	0.321	0.301	0.313	0.249	0.294	0.277	0.345	0.364	0.315	0.296	0.385	0.325	0.282	0.369	0.278	0.305	0.305	0.296	0.298	0.287	0.293	0.188	0.285	0.309	0.255	0.292	0.449	0.273	0.293	0.241	0.252	0.259	0.274	0.293	0.294	0.268	0.271	0.289	0.264
Protein-Energy Malnutrition	D011502	0.342	0.628	0.192	0.635	0.629	0.579	0.609	0.603	0.233	0.448	0.399	0.635	0.641	0.666	0.721	0.64	0.462	0.561	0.45	0.398	0.519	0.629	0.555	0.535	0.507	0.748	0.613	0.609	0.586	0.642	0.202	0.637	0.607	0.499	0.615	0.561	0.803	0.546	0.589	0.64	0.721	0.613	0.601	0.461	0.651	0.576	0.617	0.649
Proteinuria	D011507	0.307	0.694	0.167	0.712	0.629	0.596	0.708	0.699	0.222	0.432	0.386	0.626	0.764	0.675	0.661	0.681	0.426	0.619	0.44	0.373	0.497	0.726	0.665	0.552	0.546	0.728	0.565	0.74	0.57	0.725	0.186	0.711	0.579	0.458	0.695	0.614	0.735	0.54	0.64	0.697	0.742	0.64	0.706	0.409	0.714	0.694	0.712	0.739
Protozoan infections	D011528	0.355	0.43	0.221	0.369	0.369	0.438	0.388	0.379	0.306	0.303	0.298	0.402	0.411	0.42	0.397	0.372	0.338	0.359	0.417	0.485	0.459	0.376	0.368	0.347	0.454	0.41	0.427	0.383	0.423	0.372	0.216	0.369	0.385	0.392	0.395	0.339	0.421	0.398	0.435	0.414	0.402	0.4	0.356	0.334	0.401	0.353	0.366	0.384
Pseudoxanthoma elasticum	D011561	0.423	0.542	0.258	0.376	0.398	0.463	0.499	0.43	0.175	0.347	0.332	0.604	0.462	0.423	0.464	0.471	0.428	0.408	0.359	0.418	0.467	0.395	0.394	0.376	0.412	0.411	0.436	0.392	0.392	0.388	0.15	0.394	0.396	0.35	0.38	0.434	0.406	0.4	0.439	0.395	0.466	0.454	0.387	0.319	0.4	0.379	0.387	0.407
Psoriasis	D011565	0.3	0.669	0.162	0.691	0.609	0.56	0.768	0.747	0.221	0.434	0.355	0.599	0.667	0.656	0.667	0.642	0.444	0.574	0.426	0.361	0.498	0.742	0.579	0.592	0.549	0.676	0.536	0.713	0.561	0.709	0.204	0.668	0.535	0.55	0.666	0.581	0.712	0.523	0.778	0.761	0.751	0.716	0.691	0.396	0.764	0.713	0.675	0.798
Psychotic disorders	D011618	0.333	0.586	0.193	0.655	0.644	0.564	0.633	0.605	0.22	0.449	0.374	0.56	0.626	0.671	0.594	0.66	0.459	0.702	0.417	0.349	0.513	0.706	0.533	0.518	0.499	0.661	0.51	0.692	0.543	0.693	0.174	0.76	0.511	0.437	0.607	0.561	0.65	0.503	0.577	0.631	0.676	0.582	0.733	0.412	0.651	0.721	0.791	0.67
Blepharoptosis	D001763	0.346	0.615	0.194	0.641	0.611	0.59	0.605	0.578	0.276	0.467	0.409	0.617	0.657	0.632	0.612	0.656	0.428	0.508	0.475	0.415	0.527	0.582	0.594	0.503	0.57	0.635	0.616	0.61	0.586	0.576	0.233	0.58	0.624	0.519	0.604	0.53	0.641	0.577	0.592	0.585	0.626	0.611	0.543	0.473	0.631	0.545	0.58	0.58
Pulmonary alveolar proteinosis	D011649	0.317	0.625	0.172	0.601	0.584	0.554	0.615	0.629	0.264	0.421	0.36	0.575	0.624	0.646	0.64	0.556	0.468	0.606	0.406	0.359	0.499	0.644	0.523	0.539	0.545	0.622	0.511	0.615	0.552	0.657	0.215	0.595	0.55	0.497	0.619	0.561	0.627	0.52	0.656	0.701	0.639	0.596	0.586	0.387	0.638	0.633	0.598	0.675
Pulmonary embolism	D011655	0.28	0.588	0.147	0.539	0.501	0.528	0.524	0.55	0.228	0.436	0.397	0.549	0.523	0.523	0.537	0.51	0.445	0.498	0.434	0.343	0.464	0.521	0.522	0.473	0.505	0.534	0.488	0.55	0.502	0.522	0.204	0.483	0.53	0.433	0.571	0.545	0.513	0.519	0.546	0.544	0.534	0.53	0.471	0.42	0.557	0.497	0.495	0.535
Pulmonary fibrosis	D011658	0.316	0.701	0.154	0.737	0.641	0.598	0.727	0.717	0.208	0.445	0.391	0.632	0.738	0.71	0.678	0.703	0.437	0.62	0.432	0.372	0.529	0.793	0.574	0.574	0.527	0.732	0.566	0.753	0.583	0.76	0.186	0.771	0.535	0.459	0.665	0.604	0.735	0.556	0.763	0.739	0.799	0.69	0.785	0.403	0.764	0.766	0.769	0.812
Hypertension, Pulmonary	D006976	0.286	0.524	0.147	0.702	0.547	0.509	0.501	0.527	0.206	0.506	0.454	0.488	0.533	0.532	0.506	0.524	0.42	0.502	0.532	0.349	0.432	0.496	0.538	0.468	0.469	0.544	0.549	0.545	0.589	0.527	0.18	0.504	0.534	0.435	0.55	0.483	0.526	0.566	0.508	0.527	0.528	0.525	0.475	0.468	0.573	0.453	0.505	0.508
Pyelonephritis	D011704	0.35	0.447	0.163	0.435	0.357	0.408	0.429	0.43	0.198	0.38	0.369	0.432	0.448	0.416	0.409	0.383	0.324	0.387	0.525	0.451	0.427	0.387	0.361	0.334	0.468	0.395	0.435	0.421	0.465	0.373	0.217	0.378	0.455	0.364	0.449	0.342	0.411	0.407	0.423	0.434	0.427	0.42	0.347	0.375	0.429	0.348	0.357	0.398
Rabies	D011818	0.306	0.607	0.176	0.726	0.67	0.56	0.643	0.642	0.216	0.421	0.395	0.572	0.655	0.69	0.609	0.68	0.438	0.578	0.422	0.345	0.491	0.783	0.555	0.553	0.504	0.652	0.534	0.732	0.554	0.733	0.176	0.79	0.521	0.441	0.607	0.594	0.661	0.519	0.589	0.673	0.717	0.587	0.797	0.416	0.709	0.755	0.78	0.728
Rectal Neoplasms	D012004	0.298	0.512	0.176	0.496	0.497	0.497	0.516	0.502	0.202	0.414	0.314	0.491	0.493	0.527	0.512	0.505	0.414	0.804	0.433	0.339	0.486	0.505	0.56	0.423	0.457	0.539	0.465	0.539	0.473	0.493	0.18	0.517	0.481	0.383	0.542	0.514	0.517	0.463	0.505	0.489	0.495	0.518	0.497	0.413	0.513	0.529	0.561	0.492
Carcinoma, Renal Cell	D002292	0.308	0.675	0.168	0.731	0.666	0.586	0.692	0.69	0.217	0.428	0.373	0.598	0.683	0.707	0.651	0.677	0.444	0.595	0.426	0.372	0.518	0.8	0.555	0.558	0.517	0.7	0.552	0.745	0.574	0.763	0.184	0.792	0.527	0.474	0.655	0.594	0.727	0.519	0.706	0.734	0.793	0.641	0.811	0.409	0.746	0.78	0.773	0.805
Acidosis, Renal Tubular	D000141	0.304	0.733	0.176	0.66	0.668	0.732	0.615	0.657	0.272	0.464	0.375	0.576	0.647	0.661	0.616	0.599	0.43	0.535	0.43	0.346	0.505	0.668	0.542	0.558	0.551	0.633	0.557	0.641	0.594	0.701	0.24	0.635	0.602	0.547	0.728	0.591	0.645	0.544	0.655	0.704	0.689	0.603	0.601	0.445	0.71	0.595	0.64	0.674
Respiratory Distress Syndrome, Adult	D012128	0.309	0.76	0.163	0.704	0.636	0.608	0.779	0.736	0.214	0.436	0.372	0.669	0.689	0.712	0.692	0.669	0.434	0.645	0.436	0.368	0.514	0.765	0.622	0.567	0.557	0.694	0.56	0.731	0.56	0.757	0.196	0.701	0.572	0.469	0.749	0.611	0.717	0.532	0.732	0.826	0.777	0.747	0.701	0.389	0.846	0.715	0.683	0.809
Respiratory Insufficiency	D012131	0.295	0.634	0.148	0.596	0.561	0.552	0.626	0.648	0.203	0.431	0.422	0.59	0.606	0.631	0.617	0.571	0.474	0.538	0.4	0.355	0.522	0.666	0.507	0.6	0.501	0.62	0.541	0.62	0.583	0.646	0.194	0.583	0.546	0.522	0.613	0.558	0.621	0.52	0.674	0.701	0.651	0.628	0.576	0.403	0.63	0.595	0.574	0.667
Respiratory tract diseases	D012140	0.319	0.685	0.151	0.641	0.633	0.6	0.655	0.687	0.198	0.427	0.383	0.602	0.666	0.651	0.659	0.632	0.488	0.578	0.435	0.397	0.538	0.668	0.517	0.536	0.537	0.632	0.533	0.659	0.592	0.661	0.172	0.66	0.549	0.501	0.619	0.587	0.661	0.525	0.65	0.71	0.703	0.615	0.629	0.42	0.675	0.643	0.655	0.686
Lymphoma, Non-Hodgkin	D008228	0.404	0.613	0.205	0.535	0.516	0.598	0.577	0.567	0.229	0.432	0.388	0.589	0.586	0.575	0.581	0.562	0.472	0.504	0.495	0.516	0.601	0.547	0.483	0.483	0.579	0.562	0.538	0.554	0.552	0.542	0.2	0.544	0.543	0.469	0.535	0.526	0.583	0.502	0.576	0.569	0.577	0.54	0.489	0.412	0.544	0.498	0.525	0.55
Retinal diseases	D012164	0.319	0.653	0.168	0.733	0.654	0.591	0.655	0.67	0.211	0.438	0.383	0.598	0.687	0.684	0.633	0.688	0.455	0.607	0.451	0.389	0.521	0.711	0.579	0.536	0.526	0.671	0.563	0.701	0.599	0.69	0.183	0.722	0.553	0.474	0.627	0.597	0.676	0.551	0.625	0.675	0.719	0.628	0.697	0.486	0.693	0.686	0.732	0.697
Retinitis pigmentosa	D012174	0.341	0.444	0.192	0.499	0.56	0.483	0.454	0.434	0.204	0.446	0.419	0.441	0.493	0.487	0.444	0.525	0.481	0.487	0.418	0.346	0.474	0.468	0.464	0.471	0.45	0.457	0.459	0.496	0.551	0.471	0.146	0.497	0.459	0.423	0.463	0.505	0.453	0.481	0.421	0.438	0.469	0.46	0.466	0.66	0.467	0.444	0.495	0.434
Retinoblastoma	D012175	0.292	0.609	0.174	0.539	0.512	0.53	0.727	0.611	0.266	0.474	0.351	0.527	0.563	0.554	0.59	0.504	0.413	0.527	0.446	0.357	0.474	0.547	0.506	0.493	0.486	0.601	0.524	0.549	0.531	0.552	0.259	0.523	0.533	0.504	0.594	0.493	0.612	0.498	0.667	0.688	0.588	0.817	0.505	0.429	0.68	0.527	0.501	0.579
Rett syndrome	D015518	0.285	0.569	0.164	0.608	0.57	0.548	0.566	0.562	0.24	0.486	0.429	0.54	0.575	0.572	0.681	0.56	0.418	0.528	0.454	0.37	0.459	0.554	0.533	0.56	0.48	0.589	0.572	0.568	0.576	0.581	0.238	0.562	0.553	0.524	0.596	0.513	0.673	0.535	0.54	0.588	0.586	0.572	0.521	0.47	0.589	0.507	0.55	0.594
Rhabdomyosarcoma	D012208	0.321	0.613	0.166	0.653	0.599	0.578	0.595	0.613	0.259	0.438	0.439	0.565	0.602	0.609	0.586	0.581	0.435	0.512	0.496	0.424	0.531	0.594	0.549	0.5	0.546	0.624	0.547	0.625	0.602	0.586	0.212	0.594	0.573	0.503	0.602	0.522	0.635	0.572	0.572	0.628	0.634	0.569	0.529	0.477	0.633	0.525	0.572	0.594
Rheumatic fever	D012213	0.362	0.705	0.158	0.618	0.56	0.58	0.681	0.68	0.218	0.447	0.361	0.668	0.675	0.646	0.673	0.606	0.457	0.572	0.435	0.396	0.503	0.657	0.492	0.568	0.513	0.618	0.557	0.613	0.569	0.648	0.199	0.608	0.581	0.502	0.6	0.569	0.622	0.51	0.662	0.701	0.705	0.616	0.576	0.367	0.64	0.608	0.611	0.676
Rheumatic Diseases	D012216	0.331	0.631	0.174	0.649	0.619	0.616	0.612	0.659	0.259	0.491	0.378	0.573	0.608	0.638	0.586	0.628	0.485	0.539	0.442	0.401	0.567	0.631	0.596	0.545	0.567	0.618	0.54	0.656	0.6	0.609	0.224	0.629	0.576	0.529	0.604	0.597	0.638	0.531	0.62	0.629	0.634	0.593	0.586	0.451	0.629	0.613	0.62	0.618
Arthritis, Rheumatoid	D001172	0.301	0.612	0.169	0.674	0.632	0.553	0.652	0.649	0.206	0.391	0.353	0.565	0.641	0.663	0.619	0.642	0.431	0.582	0.395	0.346	0.479	0.819	0.521	0.516	0.478	0.641	0.502	0.715	0.521	0.745	0.175	0.826	0.489	0.446	0.591	0.562	0.679	0.482	0.625	0.686	0.717	0.59	0.883	0.386	0.684	0.752	0.794	0.767
Salmonella infections	D012480	0.358	0.647	0.157	0.521	0.488	0.577	0.625	0.633	0.214	0.398	0.341	0.6	0.596	0.579	0.623	0.563	0.505	0.55	0.412	0.398	0.524	0.582	0.487	0.501	0.497	0.55	0.52	0.586	0.512	0.614	0.158	0.576	0.501	0.456	0.573	0.532	0.678	0.49	0.619	0.628	0.609	0.582	0.528	0.38	0.576	0.54	0.533	0.636
Sarcoidosis	D012507	0.316	0.712	0.155	0.691	0.603	0.59	0.774	0.763	0.195	0.433	0.363	0.645	0.71	0.688	0.698	0.662	0.457	0.604	0.418	0.371	0.517	0.784	0.564	0.575	0.557	0.663	0.564	0.734	0.549	0.731	0.189	0.729	0.547	0.471	0.668	0.57	0.722	0.518	0.791	0.79	0.766	0.766	0.736	0.378	0.742	0.745	0.695	0.834
Sarcoma	D012509	0.34	0.621	0.194	0.637	0.635	0.66	0.593	0.618	0.263	0.444	0.404	0.578	0.635	0.652	0.604	0.634	0.483	0.534	0.486	0.421	0.56	0.627	0.558	0.542	0.539	0.62	0.568	0.64	0.616	0.623	0.214	0.639	0.595	0.528	0.591	0.583	0.636	0.554	0.585	0.615	0.636	0.569	0.578	0.492	0.603	0.572	0.617	0.587
Schistosomiasis mansoni	D012555	0.39	0.738	0.163	0.597	0.533	0.612	0.69	0.687	0.183	0.465	0.42	0.687	0.686	0.597	0.625	0.612	0.441	0.56	0.449	0.434	0.542	0.588	0.498	0.557	0.549	0.578	0.588	0.602	0.515	0.562	0.187	0.57	0.568	0.464	0.593	0.546	0.585	0.52	0.69	0.612	0.659	0.787	0.538	0.387	0.593	0.561	0.58	0.607
Schistosomiasis	D012552	0.326	0.602	0.151	0.595	0.56	0.569	0.6	0.617	0.255	0.462	0.382	0.55	0.599	0.62	0.61	0.557	0.461	0.535	0.432	0.357	0.531	0.632	0.456	0.595	0.487	0.604	0.52	0.579	0.593	0.641	0.198	0.609	0.546	0.524	0.579	0.564	0.611	0.493	0.66	0.687	0.611	0.593	0.559	0.374	0.602	0.583	0.567	0.644
Schizophrenia	D012559	0.313	0.625	0.176	0.678	0.651	0.548	0.68	0.652	0.203	0.412	0.358	0.574	0.65	0.665	0.649	0.66	0.425	0.599	0.423	0.355	0.481	0.801	0.548	0.518	0.483	0.672	0.515	0.728	0.529	0.754	0.178	0.817	0.502	0.446	0.612	0.56	0.709	0.491	0.635	0.707	0.748	0.607	0.873	0.4	0.697	0.764	0.793	0.787
Scleroderma, Systemic	D012595	0.322	0.629	0.17	0.722	0.674	0.56	0.658	0.648	0.256	0.428	0.402	0.615	0.675	0.687	0.628	0.666	0.432	0.564	0.426	0.378	0.52	0.718	0.547	0.566	0.511	0.663	0.565	0.684	0.601	0.703	0.201	0.736	0.544	0.48	0.595	0.587	0.663	0.544	0.632	0.671	0.709	0.611	0.698	0.416	0.681	0.672	0.732	0.686
Sella turcica tumor		0.383	0.507	0.22	0.543	0.532	0.505	0.529	0.516	0.261	0.511	0.399	0.502	0.53	0.557	0.53	0.545	0.434	0.515	0.529	0.398	0.518	0.521	0.563	0.529	0.519	0.579	0.555	0.54	0.564	0.536	0.257	0.5	0.633	0.493	0.553	0.503	0.54	0.562	0.526	0.519	0.554	0.548	0.476	0.46	0.557	0.479	0.492	0.503
Seminoma	D018239	0.328	0.499	0.189	0.533	0.5	0.491	0.502	0.52	0.214	0.494	0.433	0.464	0.514	0.506	0.487	0.475	0.396	0.471	0.471	0.389	0.543	0.476	0.474	0.451	0.506	0.505	0.525	0.496	0.503	0.468	0.187	0.468	0.542	0.438	0.541	0.454	0.489	0.471	0.532	0.493	0.484	0.521	0.428	0.409	0.514	0.443	0.453	0.474
Sepsis	D018805	0.34	0.803	0.145	0.604	0.539	0.649	0.634	0.664	0.222	0.447	0.348	0.633	0.64	0.594	0.649	0.556	0.436	0.55	0.471	0.422	0.492	0.622	0.519	0.537	0.575	0.626	0.54	0.611	0.555	0.647	0.218	0.561	0.581	0.53	0.775	0.549	0.653	0.545	0.684	0.716	0.7	0.631	0.536	0.403	0.716	0.554	0.546	0.663
Serous cancer		0.343	0.579	0.183	0.54	0.552	0.531	0.56	0.676	0.249	0.443	0.383	0.57	0.547	0.577	0.687	0.537	0.502	0.553	0.449	0.408	0.545	0.573	0.501	0.526	0.477	0.588	0.537	0.561	0.556	0.567	0.241	0.553	0.549	0.482	0.568	0.521	0.606	0.566	0.633	0.594	0.62	0.597	0.532	0.422	0.579	0.547	0.541	0.604
Severe acute respiratory syndrome	D045169	0.321	0.753	0.161	0.651	0.623	0.61	0.679	0.667	0.218	0.43	0.371	0.655	0.681	0.641	0.677	0.631	0.45	0.563	0.425	0.373	0.502	0.712	0.567	0.549	0.535	0.649	0.561	0.67	0.555	0.689	0.202	0.669	0.587	0.48	0.736	0.569	0.681	0.53	0.653	0.729	0.755	0.617	0.635	0.408	0.722	0.647	0.65	0.738
Dysentery, Bacillary	D004405	0.352	0.74	0.163	0.628	0.558	0.616	0.808	0.743	0.208	0.445	0.387	0.702	0.745	0.636	0.718	0.637	0.462	0.658	0.434	0.382	0.531	0.655	0.52	0.561	0.563	0.624	0.571	0.645	0.559	0.644	0.203	0.633	0.579	0.483	0.638	0.586	0.657	0.524	0.747	0.792	0.73	0.819	0.606	0.4	0.749	0.631	0.604	0.697
Sjogren's Syndrome	D012859	0.322	0.729	0.155	0.702	0.6	0.6	0.778	0.739	0.202	0.437	0.372	0.657	0.703	0.689	0.717	0.676	0.469	0.617	0.408	0.367	0.543	0.779	0.547	0.58	0.532	0.672	0.551	0.724	0.559	0.74	0.195	0.719	0.552	0.486	0.66	0.595	0.709	0.51	0.755	0.799	0.77	0.738	0.712	0.376	0.758	0.72	0.702	0.798
Anemia, Sickle Cell	D000755	0.335	0.676	0.189	0.668	0.652	0.595	0.691	0.691	0.209	0.439	0.365	0.666	0.694	0.68	0.76	0.683	0.448	0.611	0.435	0.403	0.498	0.73	0.599	0.561	0.521	0.751	0.535	0.699	0.543	0.722	0.184	0.712	0.557	0.482	0.644	0.602	0.805	0.537	0.651	0.718	0.78	0.636	0.701	0.388	0.713	0.678	0.694	0.753
Silicosis	D012829	0.309	0.698	0.17	0.628	0.601	0.582	0.734	0.729	0.229	0.45	0.334	0.614	0.66	0.643	0.689	0.629	0.476	0.61	0.418	0.369	0.545	0.692	0.537	0.572	0.544	0.675	0.547	0.681	0.568	0.725	0.218	0.656	0.565	0.54	0.668	0.576	0.749	0.512	0.834	0.758	0.735	0.707	0.645	0.389	0.716	0.704	0.64	0.791
Sinusitis	D012852	0.322	0.688	0.161	0.636	0.611	0.611	0.68	0.738	0.196	0.431	0.349	0.618	0.709	0.691	0.717	0.637	0.466	0.651	0.433	0.394	0.507	0.671	0.527	0.533	0.557	0.616	0.537	0.655	0.547	0.706	0.178	0.646	0.542	0.478	0.641	0.595	0.728	0.544	0.67	0.755	0.703	0.641	0.617	0.37	0.699	0.615	0.631	0.731
Skin Neoplasms	D012878	0.325	0.681	0.16	0.697	0.645	0.626	0.696	0.674	0.23	0.439	0.381	0.646	0.766	0.694	0.677	0.68	0.444	0.577	0.452	0.398	0.549	0.715	0.556	0.56	0.585	0.682	0.586	0.703	0.589	0.734	0.201	0.71	0.59	0.516	0.652	0.593	0.691	0.543	0.685	0.727	0.724	0.65	0.664	0.422	0.715	0.671	0.719	0.723
Skin diseases	D012871	0.336	0.659	0.195	0.656	0.687	0.602	0.683	0.666	0.242	0.423	0.351	0.641	0.679	0.685	0.664	0.65	0.44	0.616	0.435	0.388	0.53	0.742	0.562	0.542	0.536	0.67	0.561	0.691	0.57	0.723	0.2	0.721	0.546	0.492	0.627	0.6	0.706	0.531	0.665	0.714	0.716	0.645	0.704	0.4	0.696	0.68	0.708	0.71
Skin Neoplasms	D012878	0.405	0.591	0.204	0.528	0.508	0.606	0.55	0.558	0.23	0.454	0.333	0.574	0.586	0.571	0.549	0.53	0.422	0.496	0.519	0.423	0.53	0.518	0.499	0.475	0.679	0.512	0.519	0.547	0.523	0.526	0.221	0.499	0.61	0.522	0.556	0.515	0.543	0.507	0.541	0.542	0.559	0.527	0.46	0.447	0.544	0.462	0.484	0.513
Solid tumor		0.338	0.668	0.182	0.662	0.637	0.639	0.656	0.709	0.23	0.436	0.376	0.645	0.678	0.735	0.786	0.657	0.467	0.569	0.465	0.416	0.544	0.708	0.573	0.528	0.531	0.75	0.576	0.658	0.578	0.69	0.224	0.668	0.562	0.519	0.637	0.577	0.765	0.559	0.68	0.692	0.785	0.639	0.629	0.412	0.681	0.621	0.643	0.702
Spinal cord diseases	D013118	0.34	0.692	0.183	0.655	0.647	0.599	0.685	0.654	0.235	0.438	0.374	0.666	0.685	0.681	0.661	0.652	0.469	0.589	0.44	0.384	0.534	0.691	0.572	0.545	0.523	0.823	0.565	0.67	0.576	0.719	0.211	0.691	0.554	0.485	0.64	0.577	0.736	0.552	0.642	0.673	0.78	0.63	0.676	0.42	0.676	0.656	0.689	0.671
Spinal dysraphism	D016135	0.299	0.598	0.212	0.69	0.697	0.574	0.601	0.602	0.259	0.417	0.413	0.567	0.622	0.644	0.604	0.638	0.437	0.54	0.437	0.377	0.5	0.678	0.639	0.503	0.517	0.642	0.559	0.641	0.597	0.657	0.206	0.659	0.53	0.503	0.597	0.573	0.65	0.549	0.569	0.619	0.654	0.57	0.641	0.476	0.677	0.602	0.65	0.627
Spinocerebellar ataxias	D020754	0.436	0.477	0.216	0.525	0.571	0.56	0.489	0.486	0.386	0.483	0.449	0.466	0.501	0.561	0.46	0.548	0.491	0.493	0.471	0.373	0.563	0.508	0.506	0.54	0.5	0.503	0.502	0.529	0.58	0.506	0.199	0.533	0.546	0.475	0.493	0.577	0.486	0.491	0.497	0.48	0.502	0.495	0.497	0.418	0.506	0.487	0.523	0.464
Splenic diseases	D013158	0.199	0.225	0.128	0.247	0.2	0.228	0.226	0.207	0.101	0.22	0.228	0.225	0.242	0.228	0.211	0.216	0.175	0.208	0.334	0.302	0.228	0.199	0.212	0.169	0.215	0.21	0.244	0.223	0.259	0.195	0.115	0.204	0.224	0.182	0.222	0.173	0.221	0.241	0.202	0.211	0.221	0.218	0.191	0.23	0.228	0.177	0.202	0.193
Spondylarthropathies	D025242	0.343	0.649	0.185	0.6	0.586	0.565	0.647	0.819	0.197	0.45	0.383	0.592	0.62	0.652	0.607	0.63	0.488	0.557	0.424	0.375	0.481	0.637	0.531	0.557	0.594	0.592	0.537	0.643	0.521	0.607	0.192	0.576	0.537	0.507	0.611	0.569	0.641	0.5	0.638	0.642	0.653	0.62	0.567	0.394	0.647	0.591	0.572	0.673
Neoplasms, Squamous Cell	D018307	0.321	0.663	0.176	0.707	0.659	0.598	0.723	0.698	0.208	0.409	0.359	0.606	0.692	0.72	0.68	0.686	0.457	0.598	0.419	0.372	0.514	0.818	0.546	0.546	0.516	0.664	0.529	0.749	0.558	0.759	0.178	0.813	0.522	0.47	0.622	0.596	0.701	0.52	0.664	0.726	0.771	0.667	0.824	0.399	0.748	0.761	0.803	0.781
Stomach Neoplasms	D013274	0.31	0.651	0.17	0.694	0.655	0.579	0.684	0.676	0.219	0.413	0.351	0.597	0.674	0.706	0.653	0.684	0.434	0.583	0.402	0.357	0.505	0.821	0.557	0.544	0.504	0.67	0.533	0.748	0.558	0.776	0.186	0.816	0.512	0.469	0.622	0.58	0.732	0.501	0.675	0.712	0.75	0.618	0.857	0.392	0.696	0.762	0.789	0.818
Stomach diseases	D013272	0.349	0.648	0.181	0.622	0.566	0.594	0.631	0.704	0.214	0.445	0.399	0.602	0.65	0.628	0.624	0.63	0.476	0.654	0.445	0.399	0.534	0.636	0.547	0.54	0.578	0.6	0.56	0.654	0.528	0.629	0.18	0.662	0.561	0.472	0.645	0.558	0.626	0.506	0.643	0.663	0.658	0.611	0.585	0.384	0.635	0.662	0.638	0.642
Stroke	D020521	0.313	0.662	0.194	0.698	0.661	0.596	0.704	0.678	0.215	0.413	0.351	0.613	0.685	0.713	0.672	0.68	0.427	0.599	0.409	0.367	0.507	0.825	0.559	0.532	0.512	0.687	0.527	0.745	0.529	0.769	0.191	0.808	0.508	0.465	0.621	0.587	0.711	0.498	0.679	0.733	0.749	0.633	0.852	0.39	0.738	0.772	0.787	0.81
Subacute sclerosing panencephalitis	D013344	0.284	0.746	0.165	0.607	0.558	0.592	0.624	0.611	0.241	0.412	0.371	0.604	0.65	0.609	0.635	0.568	0.422	0.526	0.438	0.371	0.491	0.629	0.587	0.518	0.584	0.633	0.532	0.623	0.539	0.661	0.204	0.566	0.535	0.457	0.76	0.546	0.64	0.538	0.63	0.694	0.691	0.612	0.566	0.369	0.734	0.595	0.576	0.699
Subarachnoid Hemorrhage	D013345	0.325	0.666	0.164	0.642	0.609	0.574	0.648	0.615	0.196	0.45	0.405	0.654	0.662	0.685	0.663	0.67	0.428	0.724	0.444	0.351	0.504	0.648	0.567	0.512	0.486	0.634	0.543	0.692	0.554	0.633	0.173	0.665	0.539	0.401	0.623	0.582	0.62	0.532	0.608	0.631	0.666	0.607	0.654	0.42	0.695	0.667	0.697	0.659
Sudden Infant Death	D013398	0.294	0.647	0.148	0.683	0.59	0.553	0.613	0.621	0.167	0.469	0.476	0.536	0.608	0.631	0.592	0.632	0.443	0.556	0.436	0.332	0.466	0.697	0.511	0.589	0.488	0.611	0.531	0.661	0.563	0.739	0.151	0.685	0.491	0.417	0.645	0.56	0.617	0.511	0.618	0.719	0.701	0.601	0.648	0.389	0.694	0.636	0.664	0.724
Sarcoma, Synovial	D013584	0.303	0.633	0.174	0.61	0.553	0.561	0.74	0.639	0.268	0.477	0.384	0.562	0.604	0.582	0.613	0.544	0.439	0.546	0.457	0.36	0.514	0.571	0.53	0.521	0.513	0.627	0.541	0.587	0.589	0.572	0.262	0.554	0.566	0.548	0.614	0.523	0.639	0.532	0.688	0.713	0.623	0.819	0.532	0.464	0.717	0.551	0.535	0.598
Synovitis	D013585	0.319	0.695	0.163	0.662	0.638	0.628	0.664	0.709	0.221	0.457	0.362	0.637	0.708	0.658	0.648	0.665	0.426	0.593	0.431	0.381	0.568	0.699	0.557	0.608	0.579	0.659	0.611	0.671	0.566	0.667	0.204	0.669	0.574	0.519	0.65	0.598	0.668	0.612	0.778	0.684	0.696	0.702	0.633	0.402	0.677	0.646	0.642	0.71
Sepsis	D018805	0.299	0.675	0.153	0.689	0.619	0.57	0.688	0.707	0.193	0.4	0.345	0.611	0.677	0.691	0.675	0.656	0.444	0.599	0.409	0.361	0.49	0.847	0.551	0.547	0.509	0.669	0.515	0.755	0.531	0.765	0.173	0.797	0.514	0.463	0.649	0.575	0.707	0.499	0.683	0.756	0.775	0.618	0.842	0.377	0.746	0.778	0.765	0.831
Scleroderma, Systemic	D012595	0.302	0.634	0.157	0.707	0.633	0.557	0.676	0.673	0.208	0.402	0.367	0.577	0.669	0.693	0.636	0.656	0.43	0.574	0.409	0.361	0.496	0.818	0.544	0.534	0.502	0.657	0.528	0.727	0.545	0.758	0.174	0.824	0.505	0.453	0.608	0.569	0.682	0.507	0.633	0.714	0.748	0.614	0.845	0.382	0.714	0.768	0.81	0.792
Takayasu Arteritis	D013625	0.391	0.7	0.204	0.543	0.544	0.596	0.579	0.557	0.22	0.373	0.353	0.752	0.685	0.568	0.673	0.595	0.442	0.508	0.433	0.445	0.522	0.561	0.605	0.479	0.545	0.564	0.536	0.561	0.489	0.543	0.169	0.538	0.576	0.409	0.544	0.542	0.559	0.504	0.53	0.545	0.611	0.538	0.531	0.363	0.598	0.552	0.542	0.555
Giant Cell Arteritis	D013700	0.37	0.771	0.166	0.613	0.577	0.635	0.644	0.664	0.219	0.462	0.374	0.761	0.72	0.685	0.803	0.607	0.473	0.596	0.442	0.416	0.508	0.632	0.526	0.53	0.535	0.601	0.571	0.597	0.538	0.609	0.218	0.587	0.589	0.486	0.647	0.559	0.621	0.552	0.642	0.668	0.677	0.628	0.553	0.418	0.638	0.56	0.574	0.635
Testicular dysfunction		0.327	0.645	0.191	0.696	0.699	0.615	0.677	0.655	0.246	0.449	0.383	0.619	0.729	0.709	0.659	0.69	0.447	0.577	0.444	0.397	0.556	0.753	0.568	0.564	0.538	0.734	0.593	0.729	0.591	0.753	0.211	0.783	0.563	0.497	0.64	0.586	0.742	0.557	0.649	0.712	0.762	0.635	0.744	0.411	0.694	0.693	0.746	0.756
Testicular Neoplasms	D013736	0.363	0.448	0.272	0.443	0.542	0.602	0.454	0.453	0.311	0.396	0.336	0.44	0.464	0.527	0.446	0.484	0.411	0.428	0.436	0.349	0.523	0.482	0.465	0.403	0.473	0.514	0.46	0.471	0.457	0.515	0.237	0.483	0.495	0.525	0.467	0.503	0.498	0.45	0.449	0.46	0.457	0.448	0.446	0.386	0.454	0.43	0.478	0.44
Thalassemia	D013789	0.327	0.748	0.169	0.694	0.641	0.607	0.69	0.701	0.202	0.426	0.39	0.673	0.728	0.689	0.704	0.689	0.446	0.62	0.429	0.376	0.497	0.752	0.573	0.598	0.524	0.785	0.556	0.686	0.563	0.788	0.193	0.724	0.539	0.463	0.702	0.59	0.734	0.524	0.686	0.764	0.819	0.664	0.714	0.405	0.743	0.684	0.695	0.741
Thromboangiitis obliterans	D013919	0.385	0.718	0.16	0.573	0.509	0.621	0.658	0.631	0.173	0.41	0.391	0.751	0.657	0.579	0.633	0.572	0.503	0.538	0.445	0.444	0.605	0.573	0.499	0.496	0.553	0.553	0.562	0.601	0.526	0.553	0.155	0.54	0.538	0.453	0.553	0.504	0.599	0.627	0.655	0.616	0.644	0.598	0.528	0.369	0.581	0.565	0.541	0.602
Thrombocytopenia	D013921	0.353	0.835	0.16	0.709	0.619	0.661	0.73	0.753	0.2	0.432	0.403	0.729	0.773	0.681	0.74	0.696	0.478	0.653	0.438	0.406	0.575	0.737	0.558	0.572	0.587	0.647	0.581	0.706	0.572	0.719	0.176	0.702	0.576	0.469	0.72	0.606	0.692	0.556	0.775	0.786	0.793	0.697	0.673	0.401	0.755	0.69	0.689	0.79
Thrombocytosis	D013922	0.332	0.79	0.162	0.593	0.548	0.641	0.629	0.657	0.206	0.456	0.385	0.616	0.616	0.602	0.652	0.568	0.46	0.566	0.508	0.427	0.504	0.623	0.543	0.501	0.576	0.605	0.515	0.617	0.546	0.654	0.198	0.556	0.56	0.484	0.777	0.566	0.623	0.551	0.66	0.718	0.7	0.618	0.541	0.429	0.717	0.55	0.545	0.665
Thrombophilia	D019851	0.327	0.704	0.174	0.687	0.633	0.605	0.724	0.707	0.235	0.431	0.366	0.66	0.702	0.67	0.701	0.679	0.437	0.589	0.429	0.392	0.528	0.781	0.655	0.565	0.563	0.696	0.555	0.74	0.544	0.711	0.206	0.685	0.583	0.473	0.667	0.625	0.695	0.537	0.782	0.723	0.744	0.676	0.704	0.393	0.728	0.758	0.679	0.805
Thrombophlebitis	D013924	0.336	0.602	0.203	0.631	0.628	0.574	0.596	0.588	0.255	0.487	0.421	0.594	0.678	0.632	0.605	0.634	0.431	0.55	0.477	0.397	0.55	0.602	0.565	0.488	0.548	0.63	0.59	0.623	0.611	0.595	0.227	0.633	0.577	0.476	0.594	0.524	0.622	0.576	0.594	0.592	0.617	0.58	0.574	0.504	0.621	0.569	0.607	0.584
Thymoma	D013945	0.323	0.659	0.17	0.586	0.609	0.588	0.659	0.697	0.246	0.429	0.345	0.577	0.623	0.624	0.645	0.592	0.481	0.556	0.426	0.408	0.498	0.644	0.513	0.663	0.519	0.625	0.545	0.63	0.569	0.679	0.224	0.61	0.568	0.672	0.638	0.567	0.726	0.503	0.674	0.678	0.688	0.621	0.577	0.384	0.624	0.58	0.577	0.671
Thyroid Neoplasms	D013964	0.309	0.664	0.168	0.675	0.62	0.565	0.69	0.688	0.235	0.425	0.34	0.604	0.681	0.716	0.688	0.661	0.425	0.583	0.41	0.355	0.505	0.761	0.531	0.559	0.499	0.674	0.536	0.696	0.573	0.727	0.208	0.724	0.527	0.479	0.628	0.575	0.685	0.497	0.744	0.736	0.745	0.66	0.721	0.393	0.704	0.796	0.746	0.779
Thyroid Diseases	D013959	0.329	0.685	0.162	0.7	0.644	0.617	0.713	0.712	0.2	0.446	0.407	0.636	0.728	0.664	0.665	0.693	0.471	0.624	0.448	0.387	0.568	0.736	0.555	0.567	0.544	0.666	0.573	0.716	0.581	0.703	0.168	0.727	0.542	0.469	0.66	0.611	0.691	0.532	0.757	0.709	0.725	0.682	0.69	0.399	0.709	0.676	0.693	0.759
Thyroiditis	D013966	0.431	0.609	0.175	0.42	0.411	0.483	0.556	0.482	0.211	0.381	0.302	0.626	0.529	0.47	0.526	0.443	0.427	0.421	0.431	0.42	0.496	0.437	0.411	0.405	0.438	0.462	0.48	0.43	0.461	0.424	0.222	0.43	0.54	0.423	0.458	0.427	0.482	0.426	0.518	0.468	0.518	0.512	0.39	0.367	0.456	0.391	0.405	0.449
Tic disorders	D013981	0.336	0.554	0.204	0.515	0.566	0.567	0.535	0.541	0.32	0.406	0.367	0.501	0.509	0.568	0.526	0.51	0.608	0.465	0.398	0.35	0.548	0.565	0.502	0.525	0.473	0.538	0.472	0.529	0.544	0.548	0.247	0.53	0.533	0.525	0.525	0.496	0.567	0.456	0.555	0.563	0.529	0.533	0.489	0.373	0.524	0.489	0.495	0.515
Tooth diseases	D014076	0.314	0.137	0.271	0.135	0.188	0.214	0.138	0.14	0.245	0.166	0.136	0.148	0.14	0.178	0.144	0.184	0.177	0.163	0.176	0.23	0.173	0.157	0.176	0.155	0.163	0.164	0.174	0.143	0.161	0.163	0.161	0.163	0.169	0.167	0.142	0.2	0.148	0.16	0.14	0.145	0.145	0.159	0.16	0.181	0.147	0.153	0.164	0.144
Hypertension, Pregnancy-Induced	D046110	0.289	0.581	0.179	0.602	0.596	0.529	0.607	0.571	0.24	0.428	0.363	0.558	0.625	0.616	0.672	0.588	0.398	0.608	0.446	0.367	0.489	0.636	0.695	0.514	0.51	0.664	0.528	0.664	0.532	0.651	0.202	0.611	0.523	0.455	0.674	0.554	0.715	0.525	0.567	0.621	0.629	0.586	0.605	0.391	0.661	0.619	0.618	0.682
Paraparesis, Tropical Spastic	D015493	0.338	0.777	0.171	0.638	0.586	0.621	0.67	0.667	0.239	0.416	0.345	0.647	0.722	0.666	0.688	0.635	0.447	0.58	0.475	0.42	0.534	0.675	0.541	0.541	0.57	0.697	0.549	0.649	0.567	0.694	0.208	0.661	0.547	0.511	0.743	0.564	0.701	0.538	0.668	0.732	0.753	0.645	0.615	0.395	0.755	0.628	0.63	0.701
Tuberculosis	D014376	0.32	0.686	0.164	0.69	0.625	0.567	0.74	0.761	0.216	0.417	0.356	0.624	0.695	0.692	0.659	0.678	0.443	0.605	0.413	0.359	0.519	0.797	0.533	0.58	0.524	0.672	0.531	0.734	0.545	0.742	0.182	0.776	0.52	0.481	0.627	0.578	0.707	0.495	0.726	0.744	0.777	0.694	0.799	0.366	0.73	0.774	0.761	0.812
Tuberous sclerosis	D014402	0.324	0.741	0.174	0.678	0.638	0.631	0.749	0.738	0.234	0.443	0.363	0.659	0.744	0.686	0.682	0.686	0.45	0.586	0.438	0.367	0.533	0.734	0.539	0.563	0.548	0.671	0.581	0.685	0.596	0.701	0.209	0.723	0.559	0.52	0.627	0.588	0.699	0.54	0.787	0.72	0.769	0.683	0.706	0.434	0.694	0.722	0.698	0.757
Tumor virus infections	D014412	0.402	0.497	0.168	0.463	0.389	0.471	0.476	0.47	0.232	0.441	0.411	0.502	0.482	0.451	0.445	0.435	0.425	0.424	0.517	0.466	0.598	0.422	0.409	0.39	0.544	0.447	0.48	0.462	0.507	0.404	0.183	0.426	0.479	0.393	0.477	0.386	0.456	0.438	0.489	0.449	0.462	0.452	0.378	0.374	0.464	0.399	0.402	0.435
Turner Syndrome	D014424	0.35	0.537	0.204	0.528	0.493	0.539	0.509	0.501	0.231	0.484	0.411	0.534	0.569	0.516	0.508	0.505	0.343	0.454	0.544	0.529	0.477	0.46	0.503	0.43	0.507	0.521	0.6	0.489	0.527	0.454	0.225	0.462	0.508	0.481	0.507	0.412	0.537	0.53	0.511	0.467	0.507	0.536	0.422	0.441	0.514	0.408	0.444	0.466
Colitis, Ulcerative	D003093	0.299	0.669	0.157	0.679	0.635	0.573	0.696	0.715	0.198	0.407	0.344	0.6	0.66	0.695	0.669	0.655	0.446	0.616	0.399	0.355	0.492	0.84	0.542	0.544	0.506	0.658	0.523	0.747	0.539	0.771	0.173	0.803	0.513	0.461	0.638	0.564	0.716	0.5	0.694	0.763	0.767	0.635	0.85	0.37	0.72	0.775	0.761	0.836
Urinary tract infections	D014552	0.44	0.561	0.147	0.362	0.329	0.429	0.507	0.445	0.151	0.283	0.294	0.606	0.474	0.391	0.46	0.397	0.38	0.376	0.362	0.436	0.425	0.381	0.314	0.356	0.441	0.373	0.392	0.379	0.374	0.352	0.131	0.374	0.417	0.342	0.379	0.367	0.396	0.344	0.447	0.398	0.468	0.419	0.345	0.254	0.399	0.372	0.362	0.402
Urogenital abnormalities	D014564	0.334	0.627	0.172	0.691	0.692	0.624	0.636	0.609	0.245	0.465	0.434	0.628	0.749	0.637	0.641	0.647	0.466	0.568	0.511	0.412	0.541	0.63	0.561	0.523	0.57	0.648	0.619	0.649	0.632	0.616	0.201	0.635	0.606	0.551	0.676	0.562	0.646	0.589	0.6	0.619	0.66	0.607	0.601	0.526	0.663	0.59	0.648	0.612
Uterine Neoplasms	D014594	0.388	0.507	0.178	0.489	0.425	0.484	0.485	0.474	0.192	0.45	0.447	0.465	0.538	0.459	0.456	0.444	0.327	0.439	0.59	0.486	0.444	0.424	0.468	0.421	0.508	0.444	0.516	0.463	0.473	0.423	0.227	0.412	0.543	0.402	0.519	0.406	0.452	0.493	0.504	0.459	0.475	0.512	0.383	0.448	0.483	0.378	0.396	0.433
Uterine diseases	D014591	0.345	0.566	0.195	0.588	0.623	0.548	0.564	0.538	0.305	0.464	0.372	0.545	0.599	0.591	0.561	0.587	0.422	0.495	0.476	0.371	0.509	0.542	0.504	0.545	0.551	0.561	0.554	0.567	0.573	0.543	0.252	0.55	0.598	0.515	0.581	0.545	0.543	0.525	0.557	0.55	0.561	0.573	0.531	0.473	0.576	0.518	0.542	0.514
Leiomyoma	D007889	0.341	0.782	0.201	0.641	0.616	0.767	0.613	0.644	0.268	0.421	0.362	0.64	0.637	0.652	0.661	0.628	0.458	0.532	0.406	0.367	0.496	0.655	0.547	0.516	0.546	0.631	0.531	0.624	0.546	0.694	0.239	0.608	0.554	0.525	0.719	0.575	0.647	0.528	0.659	0.704	0.71	0.611	0.584	0.414	0.704	0.581	0.624	0.663
Uveitis	D014605	0.34	0.674	0.182	0.631	0.598	0.589	0.675	0.815	0.221	0.452	0.37	0.631	0.637	0.658	0.727	0.63	0.481	0.604	0.45	0.394	0.542	0.694	0.571	0.562	0.586	0.659	0.558	0.678	0.557	0.671	0.215	0.632	0.571	0.531	0.677	0.598	0.692	0.529	0.702	0.697	0.716	0.649	0.599	0.405	0.697	0.631	0.613	0.705
Uveomeningoencephalitic Syndrome	D014607	0.186	0.163	0.331	0.198	0.229	0.186	0.17	0.162	0.199	0.194	0.199	0.181	0.186	0.196	0.181	0.209	0.147	0.174	0.204	0.198	0.163	0.18	0.259	0.171	0.231	0.199	0.233	0.187	0.201	0.192	0.211	0.178	0.204	0.198	0.211	0.197	0.184	0.208	0.175	0.168	0.181	0.175	0.179	0.298	0.199	0.168	0.18	0.166
Vaccinia	D014615	0.364	0.633	0.17	0.659	0.595	0.579	0.717	0.708	0.238	0.454	0.405	0.599	0.637	0.628	0.689	0.626	0.472	0.543	0.432	0.414	0.588	0.682	0.525	0.582	0.531	0.633	0.581	0.647	0.623	0.637	0.215	0.67	0.58	0.492	0.601	0.564	0.672	0.528	0.673	0.641	0.688	0.635	0.611	0.411	0.635	0.624	0.632	0.669
Varicose Veins	D014648	0.34	0.52	0.232	0.531	0.557	0.548	0.5	0.492	0.251	0.449	0.382	0.531	0.561	0.543	0.513	0.526	0.468	0.494	0.476	0.421	0.542	0.5	0.494	0.459	0.56	0.555	0.574	0.527	0.537	0.511	0.163	0.507	0.485	0.442	0.511	0.493	0.528	0.537	0.496	0.507	0.516	0.513	0.485	0.389	0.573	0.511	0.521	0.502
Dementia, Vascular	D015140	0.311	0.607	0.197	0.614	0.615	0.537	0.627	0.609	0.236	0.415	0.375	0.569	0.619	0.662	0.608	0.62	0.411	0.736	0.43	0.354	0.496	0.659	0.662	0.501	0.509	0.646	0.54	0.702	0.513	0.668	0.2	0.64	0.518	0.423	0.68	0.564	0.634	0.522	0.587	0.621	0.647	0.589	0.641	0.401	0.656	0.66	0.682	0.677
Vascular Diseases	D014652	0.319	0.637	0.19	0.728	0.672	0.587	0.654	0.681	0.224	0.438	0.386	0.594	0.651	0.692	0.633	0.714	0.434	0.59	0.438	0.371	0.507	0.747	0.587	0.578	0.537	0.674	0.555	0.733	0.564	0.718	0.183	0.714	0.548	0.517	0.632	0.601	0.685	0.537	0.626	0.694	0.737	0.613	0.715	0.417	0.722	0.691	0.736	0.725
Vasculitis	D014657	0.363	0.734	0.166	0.651	0.559	0.612	0.722	0.682	0.234	0.441	0.371	0.682	0.676	0.647	0.657	0.634	0.467	0.579	0.412	0.425	0.532	0.633	0.56	0.522	0.585	0.593	0.54	0.656	0.512	0.642	0.21	0.611	0.586	0.453	0.646	0.589	0.624	0.512	0.648	0.648	0.681	0.645	0.58	0.377	0.649	0.621	0.617	0.656
Hepatitis, Viral, Human	D006525	0.355	0.303	0.429	0.26	0.334	0.353	0.336	0.295	0.242	0.255	0.217	0.319	0.3	0.36	0.297	0.363	0.248	0.326	0.399	0.438	0.361	0.303	0.354	0.266	0.33	0.348	0.374	0.328	0.287	0.331	0.249	0.315	0.347	0.304	0.352	0.334	0.328	0.309	0.314	0.295	0.298	0.31	0.296	0.296	0.327	0.285	0.296	0.279
Viremia	D014766	0.372	0.551	0.173	0.499	0.451	0.539	0.505	0.554	0.192	0.443	0.391	0.492	0.565	0.511	0.478	0.476	0.381	0.481	0.478	0.453	0.439	0.467	0.406	0.462	0.486	0.426	0.502	0.478	0.446	0.452	0.164	0.466	0.484	0.418	0.494	0.465	0.451	0.423	0.513	0.479	0.513	0.519	0.421	0.362	0.48	0.431	0.444	0.474
Virus Diseases	D014777	0.338	0.718	0.169	0.666	0.645	0.638	0.703	0.762	0.226	0.431	0.341	0.63	0.704	0.703	0.726	0.669	0.483	0.598	0.421	0.39	0.544	0.762	0.542	0.575	0.52	0.643	0.559	0.703	0.569	0.723	0.199	0.735	0.546	0.515	0.637	0.603	0.702	0.497	0.72	0.712	0.772	0.645	0.701	0.397	0.683	0.699	0.717	0.757
Vitamin B deficiency	D014804	0.317	0.38	0.327	0.465	0.476	0.409	0.402	0.426	0.251	0.358	0.379	0.425	0.413	0.42	0.397	0.46	0.366	0.436	0.364	0.38	0.388	0.397	0.568	0.363	0.454	0.447	0.462	0.423	0.444	0.414	0.205	0.412	0.453	0.371	0.455	0.427	0.427	0.439	0.373	0.387	0.402	0.378	0.393	0.414	0.433	0.402	0.412	0.39
Vitamin D deficiency	D014808	0.358	0.575	0.201	0.595	0.557	0.548	0.544	0.575	0.311	0.487	0.411	0.552	0.565	0.591	0.561	0.589	0.452	0.503	0.505	0.425	0.548	0.559	0.558	0.54	0.543	0.588	0.59	0.594	0.572	0.542	0.24	0.557	0.599	0.48	0.546	0.54	0.59	0.575	0.563	0.565	0.569	0.574	0.51	0.416	0.573	0.524	0.535	0.557
Vitiligo	D014820	0.371	0.626	0.214	0.648	0.671	0.587	0.638	0.633	0.268	0.442	0.377	0.616	0.668	0.718	0.638	0.657	0.451	0.576	0.474	0.395	0.565	0.676	0.592	0.562	0.547	0.712	0.573	0.688	0.568	0.679	0.225	0.694	0.588	0.494	0.626	0.594	0.669	0.555	0.607	0.635	0.709	0.599	0.64	0.414	0.698	0.643	0.661	0.654
Von Hippel-Lindau syndrome	D006623	0.355	0.474	0.21	0.456	0.492	0.452	0.462	0.499	0.288	0.408	0.366	0.471	0.453	0.509	0.479	0.471	0.487	0.49	0.404	0.369	0.501	0.472	0.457	0.452	0.463	0.497	0.457	0.481	0.519	0.473	0.222	0.484	0.526	0.428	0.482	0.475	0.488	0.457	0.51	0.482	0.465	0.495	0.46	0.419	0.485	0.479	0.468	0.466
Vulvar diseases	D014845	0.321	0.539	0.233	0.506	0.5	0.524	0.543	0.531	0.219	0.398	0.439	0.541	0.494	0.527	0.517	0.516	0.464	0.479	0.402	0.42	0.548	0.503	0.526	0.442	0.529	0.533	0.45	0.535	0.477	0.515	0.2	0.485	0.482	0.425	0.571	0.555	0.493	0.502	0.52	0.517	0.513	0.526	0.474	0.407	0.536	0.484	0.502	0.506
Werner syndrome	D014898	0.333	0.554	0.217	0.58	0.618	0.675	0.555	0.577	0.297	0.419	0.33	0.533	0.58	0.655	0.562	0.617	0.426	0.527	0.401	0.36	0.546	0.629	0.535	0.529	0.51	0.736	0.552	0.608	0.566	0.651	0.234	0.662	0.552	0.533	0.566	0.581	0.715	0.524	0.579	0.593	0.597	0.552	0.596	0.401	0.589	0.588	0.631	0.582
Wiskott-Aldrich syndrome	D014923	0.413	0.699	0.172	0.641	0.59	0.616	0.67	0.672	0.229	0.464	0.441	0.67	0.709	0.634	0.659	0.649	0.5	0.613	0.486	0.478	0.607	0.626	0.571	0.574	0.551	0.617	0.61	0.638	0.6	0.613	0.192	0.624	0.585	0.471	0.632	0.591	0.651	0.571	0.667	0.651	0.676	0.646	0.562	0.425	0.636	0.572	0.602	0.645
Yersinia infectionz	D015009	0.316	0.675	0.175	0.698	0.703	0.58	0.669	0.663	0.223	0.425	0.382	0.6	0.708	0.698	0.651	0.67	0.466	0.634	0.428	0.36	0.498	0.805	0.549	0.534	0.518	0.664	0.54	0.728	0.574	0.784	0.187	0.804	0.529	0.476	0.65	0.575	0.694	0.516	0.64	0.73	0.752	0.6	0.811	0.413	0.705	0.741	0.782	0.768
abnormalities, multiple	D000015	0.313	0.626	0.165	0.723	0.674	0.574	0.641	0.632	0.22	0.402	0.414	0.591	0.679	0.688	0.63	0.697	0.475	0.561	0.439	0.37	0.499	0.772	0.55	0.506	0.519	0.658	0.549	0.722	0.597	0.722	0.169	0.805	0.524	0.478	0.601	0.569	0.678	0.529	0.588	0.662	0.725	0.584	0.793	0.471	0.684	0.696	0.778	0.718
actinomycetales infections	D000193	0.317	0.664	0.148	0.566	0.524	0.585	0.622	0.683	0.188	0.456	0.331	0.562	0.608	0.599	0.639	0.565	0.464	0.565	0.454	0.438	0.534	0.59	0.515	0.516	0.559	0.584	0.536	0.599	0.536	0.643	0.187	0.56	0.545	0.492	0.622	0.517	0.714	0.508	0.66	0.659	0.642	0.609	0.517	0.38	0.617	0.546	0.526	0.658
adnexal diseases	D000291	0.338	0.631	0.188	0.674	0.674	0.6	0.648	0.626	0.288	0.419	0.352	0.588	0.687	0.683	0.63	0.668	0.427	0.565	0.448	0.378	0.533	0.722	0.531	0.549	0.506	0.679	0.541	0.674	0.577	0.689	0.218	0.759	0.533	0.508	0.595	0.576	0.67	0.524	0.614	0.646	0.704	0.605	0.713	0.414	0.661	0.676	0.723	0.66
adrenal gland diseases	D000307	0.32	0.536	0.22	0.609	0.634	0.561	0.561	0.566	0.259	0.453	0.396	0.545	0.581	0.634	0.574	0.614	0.432	0.534	0.422	0.348	0.509	0.612	0.538	0.518	0.507	0.62	0.555	0.613	0.574	0.623	0.216	0.63	0.568	0.503	0.632	0.604	0.604	0.526	0.551	0.587	0.597	0.545	0.588	0.448	0.603	0.562	0.602	0.575
amino acid metabolism, inborn errors	D000592	0.332	0.53	0.321	0.586	0.628	0.535	0.558	0.581	0.261	0.376	0.339	0.554	0.566	0.601	0.563	0.627	0.399	0.535	0.395	0.403	0.487	0.609	0.577	0.452	0.507	0.624	0.527	0.613	0.486	0.62	0.208	0.599	0.497	0.465	0.631	0.594	0.605	0.51	0.544	0.561	0.589	0.524	0.588	0.442	0.601	0.569	0.598	0.585
aneurysm	D000783	0.328	0.646	0.155	0.701	0.59	0.569	0.631	0.618	0.222	0.457	0.493	0.624	0.68	0.617	0.631	0.628	0.447	0.518	0.486	0.401	0.521	0.607	0.56	0.51	0.556	0.597	0.605	0.626	0.621	0.611	0.178	0.614	0.551	0.473	0.602	0.542	0.611	0.563	0.597	0.602	0.653	0.607	0.554	0.479	0.648	0.564	0.62	0.609
arrhythmias, cardiac	D001145	0.286	0.489	0.154	0.637	0.564	0.478	0.535	0.522	0.172	0.468	0.513	0.457	0.543	0.576	0.488	0.62	0.408	0.509	0.446	0.313	0.416	0.569	0.51	0.598	0.43	0.567	0.534	0.601	0.548	0.605	0.144	0.631	0.448	0.382	0.506	0.522	0.54	0.517	0.497	0.532	0.578	0.534	0.574	0.415	0.577	0.558	0.599	0.548
arterial occlusive diseases	D001157	0.319	0.544	0.174	0.61	0.609	0.585	0.528	0.543	0.259	0.464	0.457	0.527	0.566	0.584	0.516	0.576	0.474	0.506	0.475	0.368	0.521	0.537	0.53	0.514	0.536	0.588	0.586	0.577	0.628	0.54	0.233	0.561	0.598	0.559	0.561	0.536	0.565	0.586	0.54	0.539	0.567	0.543	0.512	0.535	0.582	0.527	0.569	0.508
arteriosclerosis	D001161	0.323	0.53	0.177	0.607	0.603	0.586	0.513	0.522	0.263	0.467	0.432	0.525	0.557	0.578	0.507	0.568	0.478	0.505	0.48	0.374	0.526	0.524	0.53	0.507	0.524	0.585	0.59	0.563	0.634	0.531	0.236	0.554	0.598	0.556	0.544	0.531	0.561	0.576	0.532	0.524	0.55	0.538	0.505	0.539	0.57	0.518	0.56	0.495
ataxia	D001259	0.361	0.564	0.208	0.626	0.652	0.601	0.544	0.574	0.29	0.476	0.426	0.515	0.581	0.637	0.526	0.629	0.473	0.528	0.42	0.347	0.544	0.613	0.511	0.558	0.51	0.588	0.533	0.636	0.597	0.633	0.218	0.666	0.543	0.494	0.531	0.595	0.569	0.507	0.543	0.57	0.609	0.533	0.598	0.451	0.573	0.583	0.644	0.556
autoimmune diseases of the nervous system	D020274	0.383	0.636	0.201	0.644	0.656	0.626	0.639	0.645	0.237	0.524	0.44	0.601	0.653	0.659	0.633	0.644	0.517	0.58	0.48	0.423	0.565	0.647	0.547	0.568	0.552	0.636	0.596	0.655	0.603	0.645	0.205	0.655	0.575	0.508	0.613	0.575	0.638	0.572	0.635	0.642	0.678	0.609	0.605	0.438	0.63	0.605	0.641	0.645
bacterial infections and mycoses	D001423	0.333	0.68	0.161	0.607	0.56	0.599	0.66	0.704	0.206	0.463	0.356	0.594	0.649	0.644	0.667	0.605	0.485	0.589	0.45	0.426	0.557	0.633	0.536	0.549	0.579	0.607	0.554	0.64	0.557	0.677	0.197	0.603	0.572	0.486	0.637	0.552	0.728	0.517	0.68	0.679	0.675	0.631	0.562	0.381	0.65	0.592	0.57	0.695
basal ganglia diseases	D001480	0.313	0.549	0.176	0.625	0.589	0.511	0.59	0.594	0.261	0.375	0.341	0.515	0.592	0.634	0.535	0.628	0.423	0.545	0.381	0.328	0.5	0.669	0.495	0.526	0.47	0.615	0.483	0.659	0.539	0.627	0.191	0.699	0.483	0.441	0.527	0.538	0.6	0.46	0.564	0.591	0.635	0.54	0.696	0.37	0.613	0.759	0.737	0.629
bile duct diseases	D001649	0.316	0.519	0.209	0.577	0.565	0.51	0.495	0.511	0.223	0.423	0.441	0.518	0.545	0.535	0.525	0.542	0.445	0.518	0.463	0.393	0.484	0.504	0.508	0.439	0.493	0.522	0.532	0.525	0.574	0.503	0.178	0.517	0.53	0.442	0.532	0.54	0.529	0.547	0.473	0.52	0.534	0.496	0.489	0.495	0.532	0.473	0.515	0.501
biliary tract diseases	D001660	0.316	0.519	0.209	0.577	0.565	0.51	0.495	0.511	0.223	0.423	0.441	0.518	0.545	0.535	0.525	0.542	0.445	0.518	0.463	0.393	0.484	0.504	0.508	0.439	0.493	0.522	0.532	0.525	0.574	0.503	0.178	0.517	0.53	0.442	0.532	0.54	0.529	0.547	0.473	0.52	0.534	0.496	0.489	0.495	0.532	0.473	0.515	0.501
blood coagulation disorders	D001778	0.376	0.706	0.165	0.65	0.599	0.617	0.658	0.66	0.213	0.41	0.375	0.696	0.691	0.659	0.696	0.664	0.504	0.616	0.429	0.405	0.56	0.726	0.576	0.555	0.552	0.646	0.528	0.709	0.539	0.646	0.166	0.67	0.55	0.45	0.596	0.601	0.655	0.515	0.648	0.653	0.702	0.611	0.659	0.384	0.656	0.69	0.671	0.691
blood coagulation disorders, inherited	D025861	0.363	0.683	0.157	0.61	0.576	0.588	0.62	0.611	0.206	0.391	0.378	0.703	0.663	0.635	0.672	0.633	0.515	0.595	0.399	0.355	0.534	0.664	0.554	0.539	0.522	0.604	0.504	0.673	0.517	0.604	0.158	0.622	0.529	0.428	0.572	0.586	0.605	0.501	0.612	0.613	0.658	0.583	0.619	0.38	0.624	0.661	0.635	0.636
blood platelet disorders	D001791	0.38	0.721	0.169	0.638	0.601	0.627	0.663	0.676	0.199	0.423	0.378	0.702	0.698	0.658	0.722	0.659	0.51	0.62	0.443	0.431	0.561	0.707	0.553	0.547	0.553	0.635	0.542	0.681	0.551	0.645	0.169	0.673	0.55	0.472	0.6	0.588	0.675	0.518	0.652	0.663	0.704	0.623	0.648	0.418	0.649	0.658	0.665	0.685
blood protein disorders	D001796	0.35	0.683	0.186	0.631	0.605	0.663	0.655	0.694	0.238	0.467	0.375	0.641	0.664	0.683	0.661	0.623	0.507	0.57	0.47	0.434	0.553	0.658	0.546	0.545	0.582	0.617	0.592	0.662	0.582	0.646	0.217	0.634	0.596	0.529	0.633	0.592	0.678	0.537	0.656	0.665	0.66	0.615	0.578	0.423	0.653	0.589	0.602	0.668
body weight	D001835	0.31	0.588	0.181	0.585	0.572	0.538	0.584	0.585	0.243	0.484	0.37	0.558	0.58	0.585	0.71	0.552	0.405	0.554	0.476	0.394	0.492	0.59	0.542	0.522	0.531	0.632	0.529	0.589	0.551	0.604	0.243	0.561	0.604	0.539	0.629	0.54	0.693	0.556	0.576	0.631	0.604	0.582	0.536	0.452	0.613	0.53	0.551	0.622
bone diseases, developmental	D001848	0.307	0.634	0.172	0.736	0.677	0.575	0.654	0.653	0.222	0.42	0.396	0.588	0.672	0.694	0.636	0.693	0.442	0.573	0.448	0.373	0.494	0.769	0.565	0.518	0.526	0.687	0.557	0.731	0.586	0.736	0.177	0.787	0.526	0.485	0.622	0.568	0.695	0.554	0.615	0.684	0.732	0.603	0.79	0.457	0.707	0.708	0.776	0.741
bone diseases, metabolic	D001851	0.326	0.57	0.19	0.641	0.605	0.557	0.597	0.584	0.225	0.483	0.422	0.555	0.604	0.618	0.578	0.623	0.417	0.54	0.471	0.379	0.482	0.58	0.558	0.521	0.543	0.614	0.576	0.618	0.579	0.584	0.19	0.58	0.576	0.487	0.591	0.574	0.582	0.654	0.561	0.575	0.613	0.605	0.554	0.486	0.627	0.553	0.579	0.568
brain diseases, metabolic	D001928	0.32	0.49	0.286	0.577	0.623	0.488	0.537	0.557	0.257	0.347	0.344	0.509	0.533	0.625	0.54	0.64	0.41	0.628	0.355	0.338	0.461	0.651	0.547	0.459	0.465	0.62	0.478	0.64	0.462	0.645	0.192	0.661	0.453	0.413	0.551	0.59	0.593	0.471	0.517	0.546	0.596	0.487	0.682	0.392	0.583	0.659	0.698	0.612
brain diseases, metabolic, inborn	D020739	0.319	0.485	0.287	0.572	0.623	0.487	0.533	0.554	0.256	0.346	0.34	0.507	0.531	0.623	0.536	0.638	0.404	0.629	0.354	0.338	0.452	0.643	0.544	0.458	0.461	0.618	0.476	0.634	0.458	0.64	0.192	0.653	0.451	0.414	0.548	0.587	0.59	0.471	0.509	0.541	0.592	0.484	0.676	0.392	0.58	0.654	0.694	0.604
breast diseases	D001941	0.346	0.61	0.211	0.641	0.673	0.615	0.613	0.606	0.3	0.42	0.361	0.581	0.65	0.67	0.614	0.64	0.43	0.538	0.443	0.399	0.545	0.685	0.545	0.538	0.506	0.68	0.563	0.629	0.588	0.678	0.236	0.724	0.552	0.525	0.599	0.588	0.668	0.539	0.594	0.636	0.657	0.588	0.638	0.415	0.637	0.602	0.656	0.619
carbohydrate metabolism, inborn errors	D002239	0.357	0.467	0.303	0.541	0.577	0.508	0.509	0.526	0.288	0.337	0.327	0.484	0.508	0.6	0.5	0.612	0.396	0.512	0.373	0.376	0.464	0.562	0.52	0.445	0.48	0.595	0.484	0.575	0.451	0.59	0.2	0.585	0.445	0.421	0.508	0.524	0.579	0.494	0.501	0.511	0.552	0.48	0.574	0.377	0.542	0.547	0.577	0.551
cardiomegaly	D006332	0.326	0.542	0.162	0.646	0.578	0.492	0.569	0.537	0.193	0.427	0.55	0.535	0.599	0.587	0.527	0.667	0.439	0.486	0.404	0.325	0.477	0.591	0.518	0.621	0.452	0.571	0.547	0.605	0.54	0.596	0.157	0.641	0.495	0.374	0.528	0.528	0.54	0.499	0.525	0.53	0.604	0.536	0.582	0.407	0.584	0.583	0.614	0.575
cardiomyopathies	D009202	0.32	0.549	0.163	0.669	0.592	0.494	0.594	0.555	0.19	0.427	0.529	0.534	0.614	0.614	0.545	0.688	0.437	0.52	0.41	0.333	0.473	0.643	0.52	0.606	0.455	0.604	0.541	0.638	0.545	0.636	0.157	0.702	0.493	0.387	0.548	0.546	0.58	0.501	0.542	0.563	0.641	0.559	0.649	0.406	0.613	0.624	0.664	0.615
cardiomyopathy, dilated	D002311	0.326	0.542	0.162	0.646	0.578	0.492	0.569	0.537	0.193	0.427	0.55	0.535	0.599	0.587	0.527	0.667	0.439	0.486	0.404	0.325	0.477	0.591	0.518	0.621	0.452	0.571	0.547	0.605	0.54	0.596	0.157	0.641	0.495	0.374	0.528	0.528	0.54	0.499	0.525	0.53	0.604	0.536	0.582	0.407	0.584	0.583	0.614	0.575
cardiomyopathy, hypertrophic	D002312	0.308	0.526	0.152	0.61	0.546	0.462	0.562	0.52	0.199	0.387	0.555	0.526	0.57	0.566	0.523	0.628	0.412	0.491	0.394	0.333	0.457	0.557	0.503	0.617	0.413	0.574	0.523	0.576	0.531	0.564	0.166	0.628	0.482	0.391	0.536	0.531	0.548	0.514	0.508	0.519	0.581	0.547	0.563	0.407	0.576	0.554	0.589	0.543
cardiomyopathy, hypertrophic, familial	D024741	0.309	0.525	0.153	0.61	0.545	0.461	0.56	0.516	0.201	0.384	0.559	0.525	0.568	0.564	0.521	0.627	0.412	0.487	0.391	0.333	0.455	0.553	0.502	0.615	0.412	0.571	0.525	0.575	0.531	0.562	0.167	0.625	0.482	0.385	0.536	0.526	0.547	0.513	0.505	0.517	0.579	0.545	0.558	0.401	0.575	0.551	0.587	0.54
cardiovascular abnormalities	D018376	0.295	0.599	0.152	0.748	0.634	0.541	0.631	0.609	0.186	0.432	0.488	0.562	0.658	0.648	0.588	0.712	0.452	0.54	0.436	0.353	0.468	0.701	0.547	0.529	0.496	0.624	0.564	0.693	0.585	0.681	0.15	0.745	0.508	0.433	0.576	0.553	0.636	0.534	0.566	0.639	0.696	0.586	0.711	0.457	0.664	0.64	0.733	0.677
carotid artery diseases	D002340	0.186	0.236	0.124	0.282	0.24	0.208	0.23	0.238	0.187	0.21	0.394	0.23	0.249	0.216	0.231	0.221	0.181	0.187	0.215	0.19	0.176	0.213	0.234	0.207	0.27	0.212	0.215	0.245	0.26	0.207	0.274	0.208	0.233	0.248	0.252	0.193	0.214	0.287	0.209	0.233	0.239	0.225	0.202	0.281	0.254	0.199	0.215	0.219
cerebellar ataxia	D002524	0.361	0.564	0.208	0.626	0.652	0.601	0.544	0.574	0.29	0.476	0.426	0.515	0.581	0.637	0.526	0.629	0.473	0.528	0.42	0.347	0.544	0.613	0.511	0.558	0.51	0.588	0.533	0.636	0.597	0.633	0.218	0.666	0.543	0.494	0.531	0.595	0.569	0.507	0.543	0.57	0.609	0.533	0.598	0.451	0.573	0.583	0.644	0.556
cholestasis, intrahepatic	D002780	0.316	0.519	0.209	0.577	0.565	0.51	0.495	0.511	0.223	0.423	0.441	0.518	0.545	0.535	0.525	0.542	0.445	0.518	0.463	0.393	0.484	0.504	0.508	0.439	0.493	0.522	0.532	0.525	0.574	0.503	0.178	0.517	0.53	0.442	0.532	0.54	0.529	0.547	0.473	0.52	0.534	0.496	0.489	0.495	0.532	0.473	0.515	0.501
chromosome disorders	D025063	0.29	0.632	0.161	0.717	0.685	0.588	0.625	0.618	0.23	0.411	0.449	0.592	0.679	0.685	0.623	0.662	0.49	0.559	0.473	0.369	0.493	0.703	0.568	0.508	0.533	0.648	0.583	0.687	0.637	0.668	0.178	0.719	0.558	0.512	0.611	0.569	0.67	0.556	0.576	0.648	0.686	0.582	0.676	0.517	0.674	0.64	0.698	0.653
collagen diseases	D003095	0.378	0.605	0.191	0.642	0.597	0.567	0.618	0.555	0.233	0.418	0.445	0.62	0.624	0.619	0.598	0.659	0.506	0.534	0.484	0.423	0.536	0.582	0.583	0.494	0.554	0.601	0.562	0.596	0.599	0.575	0.171	0.58	0.581	0.445	0.559	0.562	0.584	0.643	0.532	0.565	0.63	0.578	0.551	0.484	0.607	0.547	0.583	0.556
colonic diseases	D003108	0.317	0.639	0.174	0.733	0.677	0.593	0.655	0.632	0.226	0.426	0.409	0.6	0.688	0.697	0.639	0.696	0.453	0.567	0.467	0.392	0.516	0.734	0.586	0.519	0.521	0.677	0.575	0.722	0.616	0.723	0.186	0.767	0.54	0.475	0.626	0.57	0.68	0.556	0.607	0.666	0.742	0.606	0.729	0.456	0.708	0.665	0.742	0.695
colorectal neoplasms	D015179	0.32	0.638	0.177	0.727	0.671	0.594	0.65	0.632	0.236	0.432	0.404	0.602	0.691	0.688	0.641	0.695	0.449	0.56	0.455	0.392	0.526	0.721	0.58	0.522	0.524	0.676	0.578	0.709	0.618	0.712	0.192	0.761	0.54	0.481	0.614	0.568	0.681	0.551	0.609	0.659	0.735	0.601	0.713	0.45	0.688	0.652	0.733	0.683
congenital disorders of glycosylation	D018981	0.459	0.264	0.31	0.273	0.366	0.386	0.275	0.283	0.351	0.298	0.259	0.295	0.263	0.349	0.286	0.376	0.427	0.338	0.327	0.311	0.369	0.303	0.355	0.34	0.346	0.332	0.324	0.304	0.321	0.318	0.191	0.316	0.346	0.368	0.293	0.408	0.294	0.306	0.29	0.268	0.264	0.297	0.311	0.364	0.28	0.317	0.322	0.277
congenital, hereditary, and neonatal diseases and abnormalities	D009358	0.299	0.543	0.19	0.643	0.62	0.512	0.572	0.575	0.214	0.373	0.375	0.516	0.59	0.617	0.556	0.635	0.418	0.53	0.391	0.337	0.458	0.741	0.517	0.47	0.463	0.596	0.491	0.67	0.508	0.684	0.169	0.773	0.464	0.427	0.538	0.537	0.608	0.475	0.53	0.6	0.655	0.522	0.845	0.413	0.619	0.684	0.755	0.681
coronary artery disease	D003324	0.321	0.529	0.182	0.602	0.596	0.587	0.51	0.512	0.267	0.464	0.434	0.521	0.555	0.578	0.505	0.563	0.469	0.499	0.485	0.381	0.518	0.515	0.533	0.497	0.521	0.581	0.593	0.557	0.63	0.522	0.243	0.547	0.602	0.559	0.546	0.521	0.557	0.573	0.525	0.518	0.542	0.533	0.496	0.541	0.567	0.508	0.553	0.484
coronary disease	D003327	0.31	0.572	0.173	0.625	0.632	0.596	0.543	0.572	0.235	0.478	0.426	0.567	0.595	0.613	0.567	0.605	0.475	0.56	0.462	0.36	0.52	0.588	0.549	0.534	0.539	0.607	0.585	0.617	0.608	0.573	0.212	0.596	0.587	0.545	0.577	0.572	0.605	0.563	0.582	0.578	0.593	0.569	0.56	0.519	0.606	0.588	0.602	0.558
cranial nerve diseases	D003389	0.348	0.554	0.196	0.637	0.636	0.6	0.564	0.553	0.274	0.478	0.519	0.536	0.595	0.613	0.535	0.622	0.514	0.516	0.445	0.362	0.565	0.586	0.529	0.576	0.524	0.604	0.583	0.618	0.628	0.59	0.212	0.616	0.581	0.502	0.581	0.57	0.58	0.55	0.55	0.56	0.603	0.558	0.559	0.498	0.582	0.554	0.611	0.55
craniofacial abnormalities	D019465	0.3	0.65	0.16	0.751	0.678	0.597	0.657	0.642	0.211	0.423	0.44	0.612	0.692	0.694	0.646	0.694	0.479	0.565	0.481	0.395	0.504	0.734	0.577	0.504	0.539	0.677	0.605	0.721	0.633	0.708	0.171	0.756	0.555	0.512	0.624	0.562	0.702	0.564	0.6	0.672	0.728	0.606	0.716	0.505	0.701	0.669	0.743	0.701
crohn disease	D003424	0.297	0.555	0.135	0.433	0.436	0.497	0.523	0.681	0.214	0.459	0.304	0.486	0.476	0.519	0.513	0.437	0.437	0.456	0.42	0.359	0.448	0.513	0.459	0.474	0.592	0.521	0.495	0.516	0.46	0.494	0.233	0.447	0.513	0.524	0.55	0.447	0.561	0.427	0.573	0.546	0.498	0.531	0.419	0.354	0.505	0.452	0.431	0.516
death	D003643	0.296	0.468	0.166	0.558	0.51	0.473	0.463	0.46	0.197	0.488	0.48	0.462	0.508	0.524	0.463	0.546	0.381	0.472	0.432	0.331	0.428	0.477	0.491	0.564	0.405	0.513	0.526	0.502	0.542	0.505	0.172	0.542	0.468	0.399	0.492	0.477	0.481	0.509	0.45	0.467	0.502	0.488	0.476	0.427	0.517	0.475	0.511	0.459
death, sudden	D003643	0.296	0.468	0.166	0.558	0.51	0.473	0.463	0.46	0.197	0.488	0.48	0.462	0.508	0.524	0.463	0.546	0.381	0.472	0.432	0.331	0.428	0.477	0.491	0.564	0.405	0.513	0.526	0.502	0.542	0.505	0.172	0.542	0.468	0.399	0.492	0.477	0.481	0.509	0.45	0.467	0.502	0.488	0.476	0.427	0.517	0.475	0.511	0.459
dementia	D003704	0.332	0.578	0.176	0.618	0.621	0.546	0.616	0.606	0.257	0.387	0.359	0.548	0.615	0.653	0.577	0.628	0.455	0.679	0.398	0.334	0.528	0.672	0.511	0.527	0.487	0.616	0.494	0.667	0.542	0.641	0.191	0.704	0.511	0.447	0.558	0.564	0.611	0.481	0.585	0.606	0.651	0.571	0.698	0.38	0.621	0.745	0.755	0.646
demyelinating autoimmune diseases, cns	D020278	0.38	0.581	0.197	0.512	0.537	0.585	0.551	0.562	0.215	0.459	0.403	0.561	0.586	0.577	0.577	0.535	0.452	0.498	0.47	0.479	0.525	0.536	0.469	0.518	0.506	0.546	0.56	0.512	0.526	0.55	0.201	0.528	0.529	0.525	0.535	0.494	0.564	0.546	0.562	0.551	0.574	0.538	0.484	0.398	0.541	0.468	0.5	0.538
diabetes mellitus, type 1	D003922	0.296	0.657	0.171	0.644	0.602	0.581	0.632	0.666	0.263	0.461	0.397	0.587	0.652	0.663	0.628	0.614	0.436	0.578	0.437	0.354	0.498	0.655	0.574	0.599	0.517	0.756	0.562	0.655	0.597	0.706	0.236	0.642	0.542	0.507	0.666	0.573	0.654	0.553	0.659	0.674	0.664	0.643	0.614	0.425	0.648	0.619	0.617	0.649
diabetes mellitus, type 2	D003924	0.318	0.632	0.185	0.682	0.647	0.591	0.662	0.644	0.255	0.444	0.372	0.62	0.656	0.664	0.653	0.647	0.435	0.59	0.438	0.386	0.532	0.696	0.588	0.554	0.521	0.856	0.555	0.675	0.619	0.734	0.232	0.691	0.568	0.509	0.657	0.6	0.762	0.583	0.64	0.694	0.702	0.636	0.676	0.452	0.704	0.668	0.683	0.671
digestive system neoplasms	D004067	0.322	0.645	0.176	0.722	0.674	0.594	0.659	0.652	0.237	0.425	0.384	0.598	0.689	0.698	0.641	0.696	0.441	0.563	0.44	0.387	0.526	0.773	0.569	0.519	0.524	0.668	0.573	0.722	0.603	0.73	0.189	0.801	0.533	0.479	0.613	0.574	0.686	0.533	0.618	0.675	0.743	0.607	0.766	0.437	0.696	0.685	0.768	0.713
disorders of sex development	D012734	0.302	0.624	0.181	0.713	0.694	0.592	0.638	0.633	0.24	0.448	0.439	0.608	0.728	0.647	0.635	0.664	0.45	0.562	0.496	0.394	0.509	0.653	0.578	0.489	0.564	0.651	0.59	0.685	0.606	0.637	0.185	0.654	0.569	0.547	0.688	0.574	0.668	0.578	0.596	0.636	0.663	0.603	0.622	0.512	0.697	0.598	0.65	0.649
dna repair-deficiency disorders	D049914	0.331	0.571	0.203	0.637	0.659	0.62	0.554	0.586	0.28	0.403	0.366	0.534	0.617	0.672	0.568	0.614	0.452	0.508	0.414	0.354	0.524	0.661	0.51	0.512	0.503	0.596	0.573	0.629	0.581	0.665	0.218	0.711	0.555	0.517	0.539	0.568	0.615	0.501	0.545	0.596	0.63	0.521	0.62	0.418	0.585	0.581	0.658	0.594
dwarfism	D004392	0.302	0.666	0.18	0.726	0.681	0.615	0.665	0.667	0.229	0.458	0.436	0.618	0.688	0.694	0.649	0.701	0.439	0.566	0.474	0.391	0.499	0.7	0.596	0.536	0.56	0.722	0.597	0.709	0.605	0.715	0.192	0.687	0.545	0.504	0.653	0.595	0.695	0.576	0.637	0.665	0.709	0.641	0.667	0.464	0.707	0.638	0.689	0.697
dyskinesias	D020820	0.34	0.568	0.188	0.658	0.65	0.574	0.587	0.598	0.249	0.454	0.412	0.53	0.608	0.643	0.553	0.646	0.464	0.551	0.411	0.322	0.507	0.665	0.505	0.548	0.488	0.609	0.514	0.669	0.563	0.663	0.194	0.715	0.518	0.471	0.552	0.574	0.593	0.495	0.552	0.595	0.653	0.542	0.666	0.43	0.598	0.645	0.699	0.614
dysostoses	D004413	0.305	0.627	0.172	0.723	0.688	0.597	0.619	0.628	0.236	0.445	0.446	0.581	0.641	0.669	0.608	0.667	0.466	0.538	0.479	0.403	0.505	0.656	0.583	0.514	0.542	0.656	0.601	0.668	0.644	0.647	0.188	0.667	0.57	0.541	0.608	0.557	0.683	0.577	0.588	0.637	0.671	0.593	0.618	0.519	0.677	0.596	0.657	0.636
dyssomnias	D020920	0.329	0.556	0.185	0.609	0.638	0.6	0.567	0.569	0.253	0.419	0.412	0.527	0.583	0.63	0.55	0.599	0.478	0.533	0.476	0.397	0.497	0.578	0.535	0.516	0.479	0.611	0.547	0.605	0.603	0.592	0.187	0.598	0.534	0.501	0.579	0.555	0.597	0.545	0.536	0.578	0.598	0.554	0.574	0.484	0.597	0.56	0.604	0.563
exophthalmos	D005094	0.398	0.448	0.191	0.418	0.378	0.451	0.413	0.421	0.154	0.426	0.356	0.422	0.453	0.428	0.422	0.399	0.392	0.408	0.657	0.462	0.404	0.386	0.383	0.356	0.413	0.399	0.438	0.409	0.469	0.385	0.177	0.376	0.451	0.393	0.45	0.367	0.409	0.423	0.443	0.409	0.435	0.399	0.345	0.422	0.417	0.33	0.359	0.381
eye diseases, hereditary	D015785	0.357	0.607	0.191	0.68	0.638	0.584	0.619	0.613	0.231	0.427	0.404	0.586	0.655	0.664	0.606	0.701	0.481	0.569	0.426	0.366	0.534	0.697	0.528	0.531	0.518	0.621	0.542	0.697	0.563	0.659	0.164	0.715	0.535	0.452	0.577	0.586	0.629	0.53	0.585	0.626	0.689	0.583	0.7	0.492	0.635	0.67	0.718	0.67
female urogenital diseases	D052776	0.301	0.589	0.172	0.697	0.656	0.55	0.626	0.62	0.218	0.402	0.382	0.558	0.662	0.657	0.602	0.657	0.426	0.554	0.42	0.351	0.484	0.772	0.547	0.503	0.495	0.636	0.529	0.718	0.549	0.72	0.174	0.793	0.495	0.454	0.599	0.561	0.653	0.511	0.575	0.645	0.703	0.569	0.828	0.422	0.671	0.713	0.773	0.73
female urogenital diseases and pregnancy complications	D005261	0.301	0.587	0.174	0.695	0.653	0.549	0.625	0.619	0.22	0.402	0.381	0.556	0.657	0.657	0.601	0.659	0.425	0.554	0.417	0.349	0.484	0.771	0.546	0.502	0.495	0.636	0.529	0.719	0.547	0.72	0.175	0.795	0.494	0.453	0.597	0.559	0.653	0.511	0.576	0.646	0.7	0.568	0.83	0.42	0.67	0.714	0.772	0.731
gastrointestinal diseases	D005767	0.315	0.65	0.165	0.718	0.67	0.589	0.667	0.685	0.215	0.42	0.384	0.599	0.682	0.703	0.647	0.691	0.453	0.578	0.438	0.381	0.512	0.799	0.564	0.527	0.526	0.666	0.556	0.743	0.592	0.756	0.176	0.811	0.527	0.478	0.629	0.573	0.703	0.53	0.625	0.698	0.755	0.611	0.796	0.432	0.71	0.708	0.779	0.75
genetic diseases, x-linked	D040181	0.329	0.58	0.22	0.666	0.662	0.553	0.615	0.62	0.253	0.395	0.366	0.544	0.628	0.675	0.586	0.68	0.44	0.553	0.405	0.349	0.5	0.747	0.54	0.52	0.49	0.633	0.523	0.69	0.533	0.709	0.196	0.767	0.508	0.474	0.572	0.593	0.648	0.496	0.571	0.633	0.694	0.557	0.764	0.423	0.64	0.691	0.748	0.693
genital diseases, female	D005831	0.333	0.625	0.185	0.683	0.668	0.593	0.644	0.623	0.273	0.416	0.355	0.585	0.682	0.684	0.631	0.666	0.431	0.567	0.447	0.377	0.523	0.731	0.528	0.534	0.5	0.677	0.541	0.679	0.578	0.696	0.211	0.773	0.526	0.5	0.594	0.563	0.677	0.521	0.603	0.647	0.708	0.596	0.729	0.414	0.661	0.68	0.735	0.674
genital diseases, male	D005832	0.348	0.611	0.199	0.644	0.68	0.605	0.596	0.581	0.274	0.467	0.388	0.58	0.649	0.631	0.596	0.613	0.449	0.559	0.483	0.396	0.53	0.628	0.54	0.516	0.524	0.619	0.578	0.64	0.617	0.618	0.233	0.656	0.588	0.502	0.616	0.545	0.614	0.556	0.565	0.598	0.643	0.565	0.601	0.5	0.609	0.595	0.656	0.6
genital neoplasms, female	D005833	0.338	0.63	0.187	0.677	0.661	0.595	0.644	0.622	0.27	0.409	0.359	0.593	0.678	0.69	0.632	0.669	0.44	0.564	0.443	0.385	0.527	0.719	0.53	0.534	0.498	0.68	0.544	0.674	0.583	0.693	0.213	0.764	0.526	0.498	0.589	0.563	0.679	0.524	0.603	0.645	0.706	0.599	0.713	0.41	0.655	0.669	0.721	0.667
genital neoplasms, male	D005834	0.345	0.598	0.197	0.633	0.664	0.608	0.589	0.574	0.268	0.46	0.39	0.57	0.641	0.625	0.584	0.608	0.455	0.56	0.493	0.401	0.534	0.611	0.539	0.517	0.525	0.614	0.577	0.624	0.624	0.607	0.233	0.642	0.591	0.511	0.614	0.544	0.608	0.562	0.561	0.589	0.63	0.561	0.586	0.513	0.601	0.583	0.641	0.582
glucose metabolism disorders	D044882	0.311	0.661	0.174	0.692	0.645	0.598	0.675	0.679	0.239	0.446	0.386	0.613	0.682	0.685	0.659	0.665	0.442	0.601	0.43	0.374	0.523	0.731	0.569	0.583	0.524	0.821	0.548	0.706	0.611	0.75	0.212	0.728	0.552	0.501	0.661	0.604	0.754	0.563	0.664	0.714	0.727	0.653	0.711	0.438	0.709	0.693	0.711	0.708
goiter	D006042	0.344	0.452	0.162	0.45	0.412	0.467	0.419	0.468	0.139	0.555	0.406	0.427	0.463	0.457	0.436	0.432	0.442	0.454	0.609	0.396	0.407	0.414	0.412	0.437	0.443	0.425	0.453	0.445	0.512	0.421	0.152	0.412	0.451	0.396	0.465	0.425	0.423	0.487	0.461	0.432	0.454	0.426	0.385	0.451	0.433	0.372	0.395	0.423
gonadal disorders	D006058	0.318	0.63	0.182	0.707	0.699	0.588	0.653	0.638	0.257	0.412	0.378	0.592	0.715	0.678	0.635	0.679	0.434	0.569	0.449	0.373	0.51	0.752	0.545	0.52	0.519	0.672	0.546	0.711	0.578	0.71	0.196	0.779	0.526	0.507	0.632	0.577	0.682	0.532	0.605	0.661	0.716	0.598	0.764	0.44	0.69	0.691	0.754	0.696
gram-positive bacterial infections	D016908	0.317	0.664	0.148	0.566	0.524	0.585	0.622	0.683	0.188	0.456	0.331	0.562	0.608	0.599	0.639	0.565	0.464	0.565	0.454	0.438	0.534	0.59	0.515	0.516	0.559	0.584	0.536	0.599	0.536	0.643	0.187	0.56	0.545	0.492	0.622	0.517	0.714	0.508	0.66	0.659	0.642	0.609	0.517	0.38	0.617	0.546	0.526	0.658
hair diseases	D006201	0.366	0.437	0.232	0.498	0.492	0.445	0.429	0.424	0.247	0.369	0.447	0.482	0.478	0.473	0.438	0.512	0.418	0.428	0.406	0.35	0.424	0.416	0.47	0.436	0.458	0.429	0.479	0.439	0.511	0.42	0.176	0.439	0.473	0.42	0.428	0.471	0.411	0.467	0.392	0.409	0.453	0.431	0.42	0.437	0.441	0.432	0.454	0.401
heart defects, congenital	D006330	0.3	0.589	0.155	0.73	0.633	0.542	0.616	0.598	0.186	0.434	0.504	0.559	0.655	0.65	0.586	0.714	0.463	0.532	0.443	0.354	0.466	0.687	0.548	0.535	0.491	0.624	0.562	0.685	0.59	0.673	0.146	0.733	0.509	0.432	0.571	0.555	0.631	0.538	0.56	0.628	0.685	0.578	0.694	0.465	0.656	0.632	0.71	0.664
hematologic diseases	D006402	0.32	0.624	0.181	0.701	0.654	0.573	0.635	0.663	0.232	0.406	0.361	0.581	0.656	0.682	0.641	0.672	0.442	0.566	0.401	0.357	0.504	0.809	0.55	0.516	0.509	0.643	0.532	0.726	0.546	0.736	0.186	0.802	0.519	0.465	0.59	0.579	0.672	0.51	0.608	0.672	0.739	0.581	0.821	0.408	0.682	0.73	0.781	0.751
hemic and lymphatic diseases	D006425	0.311	0.611	0.175	0.687	0.647	0.561	0.624	0.656	0.221	0.401	0.365	0.569	0.643	0.672	0.627	0.662	0.447	0.587	0.404	0.351	0.507	0.812	0.539	0.506	0.501	0.634	0.516	0.721	0.543	0.728	0.176	0.817	0.504	0.461	0.579	0.57	0.665	0.505	0.6	0.67	0.719	0.574	0.849	0.415	0.671	0.73	0.797	0.745
hemostatic disorders	D020141	0.32	0.665	0.17	0.736	0.635	0.605	0.659	0.646	0.234	0.456	0.414	0.632	0.669	0.671	0.641	0.689	0.435	0.546	0.45	0.397	0.496	0.655	0.584	0.518	0.562	0.637	0.619	0.655	0.626	0.649	0.204	0.661	0.577	0.488	0.619	0.566	0.669	0.556	0.582	0.637	0.692	0.611	0.603	0.464	0.674	0.593	0.66	0.651
hereditary sensory and motor neuropathy	D015417	0.368	0.595	0.211	0.621	0.643	0.571	0.623	0.627	0.23	0.414	0.404	0.572	0.604	0.649	0.589	0.659	0.635	0.579	0.371	0.331	0.547	0.667	0.52	0.553	0.474	0.596	0.518	0.669	0.545	0.653	0.171	0.683	0.521	0.461	0.546	0.614	0.615	0.484	0.604	0.605	0.654	0.593	0.66	0.444	0.613	0.647	0.695	0.648
heredodegenerative disorders, nervous system	D020271	0.333	0.574	0.214	0.657	0.662	0.548	0.609	0.614	0.247	0.4	0.368	0.541	0.614	0.669	0.577	0.678	0.467	0.579	0.391	0.339	0.506	0.759	0.537	0.519	0.485	0.627	0.514	0.707	0.534	0.715	0.19	0.796	0.498	0.445	0.56	0.581	0.636	0.485	0.572	0.623	0.696	0.554	0.813	0.415	0.632	0.728	0.789	0.7
hypersensitivity	D006967	0.354	0.563	0.196	0.565	0.562	0.549	0.565	0.557	0.272	0.387	0.425	0.546	0.581	0.56	0.55	0.56	0.449	0.526	0.43	0.366	0.489	0.542	0.543	0.469	0.537	0.517	0.491	0.573	0.505	0.531	0.215	0.526	0.547	0.441	0.579	0.54	0.523	0.482	0.543	0.539	0.555	0.531	0.499	0.456	0.55	0.5	0.53	0.535
hypersensitivity, immediate	D006969	0.354	0.563	0.196	0.565	0.562	0.549	0.565	0.557	0.272	0.387	0.425	0.546	0.581	0.56	0.55	0.56	0.449	0.526	0.43	0.366	0.489	0.542	0.543	0.469	0.537	0.517	0.491	0.573	0.505	0.531	0.215	0.526	0.547	0.441	0.579	0.54	0.523	0.482	0.543	0.539	0.555	0.531	0.499	0.456	0.55	0.5	0.53	0.535
hypopigmentation	D017496	0.353	0.614	0.181	0.596	0.566	0.59	0.591	0.607	0.258	0.459	0.391	0.588	0.61	0.569	0.598	0.588	0.469	0.529	0.446	0.407	0.56	0.583	0.529	0.499	0.55	0.582	0.545	0.589	0.571	0.561	0.208	0.571	0.571	0.519	0.601	0.565	0.582	0.539	0.594	0.579	0.599	0.59	0.53	0.486	0.584	0.545	0.569	0.569
hypothalamic diseases	D007027	0.315	0.575	0.146	0.619	0.612	0.55	0.587	0.572	0.239	0.437	0.415	0.553	0.599	0.586	0.589	0.598	0.493	0.533	0.454	0.353	0.516	0.589	0.527	0.494	0.521	0.648	0.516	0.612	0.617	0.587	0.166	0.593	0.539	0.52	0.585	0.543	0.616	0.547	0.579	0.585	0.61	0.557	0.561	0.588	0.608	0.548	0.581	0.584
hypotrichosis	D007039	0.4	0.359	0.236	0.396	0.399	0.364	0.359	0.311	0.297	0.293	0.376	0.413	0.399	0.365	0.363	0.392	0.333	0.325	0.366	0.34	0.374	0.328	0.351	0.329	0.363	0.344	0.352	0.336	0.43	0.319	0.246	0.342	0.452	0.395	0.352	0.371	0.339	0.378	0.328	0.342	0.371	0.342	0.323	0.429	0.372	0.299	0.337	0.304
immune system diseases	D007154	0.314	0.638	0.171	0.671	0.646	0.58	0.647	0.668	0.221	0.407	0.356	0.578	0.655	0.687	0.634	0.658	0.456	0.573	0.404	0.354	0.518	0.816	0.524	0.547	0.499	0.661	0.507	0.724	0.546	0.77	0.18	0.825	0.505	0.491	0.609	0.575	0.684	0.5	0.627	0.706	0.744	0.594	0.84	0.396	0.684	0.732	0.774	0.764
immunoproliferative disorders	D007160	0.332	0.642	0.171	0.693	0.664	0.604	0.659	0.678	0.237	0.432	0.38	0.608	0.68	0.7	0.646	0.667	0.471	0.586	0.428	0.379	0.58	0.771	0.537	0.557	0.526	0.655	0.558	0.706	0.594	0.728	0.191	0.803	0.538	0.505	0.599	0.586	0.698	0.542	0.654	0.699	0.719	0.617	0.751	0.438	0.679	0.693	0.737	0.734
infant, newborn, diseases	D007232	0.317	0.624	0.207	0.67	0.681	0.592	0.638	0.645	0.218	0.417	0.397	0.595	0.653	0.682	0.634	0.715	0.46	0.575	0.442	0.372	0.489	0.705	0.558	0.501	0.522	0.638	0.544	0.683	0.574	0.698	0.181	0.702	0.532	0.5	0.61	0.609	0.659	0.532	0.579	0.661	0.712	0.58	0.686	0.462	0.667	0.643	0.69	0.681
inflammatory bowel diseases	D015212	0.299	0.624	0.124	0.492	0.489	0.542	0.584	0.747	0.18	0.444	0.306	0.538	0.533	0.583	0.579	0.5	0.506	0.526	0.401	0.354	0.469	0.585	0.475	0.526	0.566	0.559	0.496	0.579	0.483	0.588	0.181	0.521	0.504	0.519	0.588	0.512	0.645	0.476	0.624	0.619	0.584	0.583	0.489	0.338	0.563	0.521	0.501	0.614
insulin resistance	D007333	0.308	0.532	0.194	0.492	0.517	0.508	0.533	0.524	0.31	0.435	0.328	0.528	0.516	0.556	0.54	0.5	0.398	0.505	0.459	0.381	0.478	0.527	0.558	0.516	0.48	0.748	0.526	0.52	0.535	0.614	0.285	0.519	0.518	0.489	0.587	0.513	0.581	0.552	0.57	0.548	0.529	0.568	0.501	0.399	0.55	0.514	0.504	0.513
intestinal neoplasms	D007414	0.32	0.638	0.177	0.727	0.671	0.594	0.65	0.632	0.236	0.432	0.404	0.602	0.691	0.688	0.641	0.695	0.449	0.56	0.455	0.392	0.526	0.721	0.58	0.522	0.524	0.676	0.578	0.709	0.618	0.712	0.192	0.761	0.54	0.481	0.614	0.568	0.681	0.551	0.609	0.659	0.735	0.601	0.713	0.45	0.688	0.652	0.733	0.683
joint diseases	D007592	0.32	0.755	0.172	0.691	0.651	0.621	0.731	0.728	0.227	0.466	0.366	0.663	0.683	0.672	0.7	0.662	0.454	0.606	0.453	0.396	0.523	0.737	0.561	0.565	0.547	0.691	0.559	0.703	0.589	0.749	0.198	0.692	0.568	0.506	0.722	0.591	0.713	0.55	0.793	0.776	0.779	0.684	0.691	0.424	0.764	0.716	0.67	0.79
leukemia, b-cell	D015448	0.351	0.604	0.184	0.613	0.616	0.609	0.601	0.615	0.262	0.472	0.368	0.559	0.635	0.641	0.594	0.624	0.431	0.541	0.452	0.392	0.565	0.633	0.497	0.566	0.519	0.602	0.573	0.605	0.581	0.633	0.221	0.675	0.573	0.507	0.581	0.574	0.623	0.504	0.612	0.616	0.615	0.587	0.579	0.409	0.601	0.585	0.61	0.604
leukemia, lymphocytic, chronic, b-cell	D015451	0.349	0.594	0.187	0.606	0.613	0.601	0.59	0.603	0.266	0.476	0.371	0.547	0.628	0.635	0.583	0.622	0.43	0.529	0.45	0.386	0.567	0.622	0.493	0.562	0.521	0.599	0.575	0.594	0.584	0.624	0.222	0.669	0.578	0.505	0.571	0.569	0.617	0.503	0.606	0.606	0.604	0.585	0.571	0.41	0.595	0.576	0.601	0.594
leukemia, lymphoid	D007945	0.342	0.651	0.175	0.687	0.662	0.622	0.653	0.672	0.236	0.44	0.385	0.611	0.684	0.689	0.645	0.659	0.464	0.581	0.441	0.387	0.553	0.746	0.543	0.558	0.524	0.646	0.561	0.688	0.592	0.716	0.196	0.765	0.555	0.507	0.602	0.592	0.689	0.544	0.645	0.69	0.71	0.619	0.702	0.426	0.67	0.659	0.711	0.706
leukemia, myeloid	D007951	0.34	0.654	0.169	0.714	0.664	0.607	0.669	0.676	0.248	0.445	0.389	0.605	0.688	0.703	0.649	0.694	0.453	0.584	0.441	0.408	0.542	0.768	0.559	0.562	0.538	0.672	0.576	0.714	0.612	0.707	0.192	0.776	0.559	0.51	0.627	0.587	0.698	0.551	0.637	0.683	0.751	0.625	0.736	0.429	0.686	0.69	0.749	0.719
leukemia, myeloid, acute	D015470	0.343	0.649	0.172	0.702	0.663	0.612	0.665	0.677	0.258	0.453	0.384	0.604	0.679	0.695	0.653	0.672	0.45	0.58	0.429	0.409	0.549	0.752	0.56	0.574	0.54	0.676	0.579	0.695	0.604	0.697	0.202	0.753	0.564	0.517	0.625	0.586	0.699	0.557	0.644	0.683	0.719	0.629	0.706	0.423	0.676	0.672	0.724	0.711
limb deformities, congenital	D017880	0.303	0.632	0.159	0.715	0.654	0.578	0.643	0.632	0.216	0.432	0.419	0.602	0.679	0.675	0.637	0.667	0.465	0.567	0.478	0.399	0.504	0.673	0.566	0.511	0.525	0.686	0.584	0.679	0.622	0.656	0.176	0.718	0.538	0.506	0.621	0.547	0.693	0.57	0.596	0.65	0.711	0.607	0.655	0.485	0.678	0.634	0.695	0.67
lipid metabolism disorders	D052439	0.298	0.568	0.201	0.634	0.648	0.522	0.609	0.6	0.235	0.388	0.358	0.551	0.614	0.648	0.601	0.662	0.434	0.661	0.382	0.326	0.48	0.717	0.547	0.522	0.478	0.646	0.491	0.685	0.519	0.686	0.202	0.732	0.49	0.443	0.6	0.586	0.635	0.493	0.588	0.633	0.663	0.571	0.746	0.406	0.647	0.728	0.741	0.679
lipid metabolism, inborn errors	D008052	0.295	0.56	0.203	0.627	0.643	0.514	0.601	0.594	0.233	0.383	0.364	0.544	0.607	0.636	0.591	0.66	0.431	0.666	0.382	0.317	0.472	0.704	0.546	0.518	0.47	0.641	0.486	0.677	0.517	0.677	0.198	0.722	0.481	0.439	0.595	0.582	0.627	0.489	0.581	0.624	0.657	0.566	0.736	0.402	0.642	0.721	0.734	0.666
lung diseases, obstructive	D008173	0.344	0.287	0.326	0.273	0.321	0.344	0.284	0.302	0.269	0.269	0.26	0.281	0.293	0.302	0.277	0.338	0.273	0.338	0.291	0.315	0.296	0.294	0.359	0.316	0.364	0.31	0.319	0.294	0.283	0.323	0.228	0.296	0.316	0.293	0.326	0.346	0.29	0.306	0.324	0.287	0.271	0.32	0.296	0.337	0.291	0.298	0.289	0.299
lupus erythematosus, systemic	D008180	0.3	0.695	0.132	0.577	0.523	0.601	0.649	0.724	0.189	0.423	0.325	0.603	0.62	0.619	0.653	0.557	0.527	0.537	0.412	0.384	0.498	0.618	0.479	0.646	0.525	0.591	0.533	0.624	0.563	0.614	0.186	0.57	0.543	0.692	0.617	0.547	0.67	0.463	0.693	0.684	0.684	0.633	0.537	0.356	0.622	0.563	0.554	0.652
lymphatic diseases	D008206	0.316	0.633	0.166	0.687	0.662	0.586	0.649	0.687	0.216	0.423	0.386	0.595	0.666	0.69	0.638	0.668	0.475	0.641	0.426	0.362	0.543	0.793	0.54	0.528	0.523	0.648	0.533	0.722	0.573	0.731	0.175	0.812	0.524	0.483	0.597	0.58	0.686	0.525	0.633	0.699	0.714	0.603	0.792	0.436	0.682	0.717	0.789	0.738
lysosomal storage diseases, nervous system	D020140	0.318	0.506	0.226	0.531	0.565	0.495	0.54	0.536	0.248	0.373	0.35	0.502	0.531	0.584	0.537	0.598	0.423	0.714	0.387	0.325	0.464	0.573	0.513	0.469	0.447	0.586	0.452	0.589	0.48	0.565	0.195	0.589	0.467	0.411	0.535	0.54	0.555	0.487	0.516	0.536	0.569	0.512	0.587	0.392	0.55	0.59	0.625	0.553
malabsorption syndromes	D008286	0.382	0.412	0.173	0.311	0.29	0.4	0.382	0.388	0.129	0.34	0.328	0.402	0.361	0.388	0.387	0.346	0.362	0.353	0.448	0.425	0.403	0.344	0.319	0.329	0.366	0.341	0.381	0.346	0.361	0.343	0.136	0.336	0.367	0.329	0.37	0.323	0.367	0.33	0.403	0.364	0.37	0.352	0.3	0.293	0.332	0.305	0.309	0.346
male urogenital diseases	D052801	0.3	0.598	0.172	0.71	0.66	0.554	0.635	0.631	0.212	0.41	0.393	0.567	0.669	0.661	0.609	0.662	0.43	0.559	0.426	0.356	0.484	0.767	0.561	0.506	0.504	0.634	0.545	0.728	0.558	0.718	0.171	0.779	0.508	0.455	0.617	0.564	0.656	0.522	0.579	0.653	0.707	0.573	0.809	0.433	0.681	0.716	0.77	0.741
malformations of cortical development	D054220	0.39	0.6	0.182	0.644	0.62	0.601	0.621	0.581	0.22	0.425	0.41	0.601	0.638	0.637	0.616	0.642	0.512	0.571	0.443	0.389	0.536	0.624	0.529	0.525	0.489	0.62	0.563	0.615	0.608	0.61	0.172	0.659	0.554	0.473	0.554	0.555	0.625	0.512	0.57	0.592	0.654	0.588	0.618	0.462	0.598	0.6	0.651	0.607
mental retardation, x-linked	D038901	0.344	0.579	0.238	0.648	0.665	0.567	0.607	0.601	0.269	0.403	0.373	0.55	0.624	0.671	0.567	0.677	0.451	0.573	0.415	0.363	0.509	0.697	0.554	0.508	0.498	0.622	0.543	0.667	0.547	0.676	0.197	0.72	0.525	0.458	0.584	0.601	0.631	0.506	0.558	0.606	0.668	0.548	0.699	0.44	0.618	0.653	0.717	0.642
metabolic diseases	D008659	0.306	0.542	0.213	0.634	0.627	0.52	0.577	0.585	0.23	0.372	0.355	0.522	0.586	0.635	0.564	0.641	0.406	0.553	0.375	0.336	0.468	0.757	0.524	0.472	0.467	0.629	0.491	0.691	0.493	0.714	0.184	0.794	0.466	0.427	0.555	0.556	0.633	0.476	0.545	0.607	0.658	0.526	0.849	0.393	0.628	0.722	0.783	0.697
metabolism, inborn errors	D008661	0.302	0.535	0.229	0.64	0.633	0.506	0.583	0.59	0.229	0.372	0.353	0.527	0.582	0.636	0.571	0.658	0.398	0.578	0.378	0.342	0.454	0.738	0.55	0.468	0.472	0.627	0.491	0.698	0.483	0.703	0.183	0.751	0.459	0.42	0.577	0.567	0.629	0.488	0.544	0.607	0.657	0.53	0.812	0.4	0.643	0.722	0.756	0.704
metal metabolism, inborn errors	D008664	0.315	0.541	0.177	0.632	0.588	0.527	0.568	0.594	0.22	0.462	0.423	0.506	0.586	0.611	0.549	0.601	0.414	0.523	0.43	0.336	0.469	0.59	0.52	0.538	0.516	0.599	0.541	0.616	0.551	0.588	0.174	0.591	0.52	0.464	0.566	0.566	0.574	0.529	0.549	0.574	0.604	0.568	0.572	0.425	0.625	0.605	0.604	0.59
motor neuron disease	D016472	0.344	0.613	0.208	0.647	0.671	0.578	0.625	0.634	0.265	0.427	0.402	0.566	0.627	0.66	0.579	0.655	0.474	0.549	0.392	0.343	0.541	0.683	0.528	0.531	0.518	0.62	0.541	0.692	0.551	0.683	0.206	0.727	0.521	0.458	0.576	0.583	0.623	0.517	0.6	0.616	0.672	0.581	0.676	0.414	0.629	0.701	0.759	0.663
mouth diseases	D009059	0.384	0.5	0.195	0.526	0.486	0.528	0.494	0.476	0.332	0.463	0.388	0.494	0.536	0.527	0.487	0.494	0.459	0.452	0.52	0.47	0.519	0.468	0.48	0.451	0.523	0.496	0.565	0.496	0.569	0.453	0.252	0.479	0.601	0.491	0.507	0.489	0.485	0.498	0.488	0.478	0.487	0.488	0.437	0.527	0.492	0.429	0.464	0.444
muscular disorders, atrophic	D020966	0.335	0.551	0.18	0.649	0.607	0.525	0.576	0.561	0.25	0.402	0.477	0.538	0.613	0.617	0.536	0.636	0.444	0.518	0.392	0.363	0.524	0.61	0.507	0.591	0.486	0.604	0.539	0.62	0.568	0.615	0.187	0.677	0.519	0.432	0.535	0.537	0.593	0.521	0.546	0.579	0.618	0.571	0.605	0.42	0.613	0.598	0.644	0.596
musculoskeletal abnormalities	D009139	0.299	0.64	0.157	0.748	0.675	0.581	0.649	0.642	0.213	0.416	0.427	0.6	0.69	0.684	0.642	0.691	0.467	0.561	0.466	0.386	0.498	0.747	0.566	0.493	0.527	0.673	0.583	0.719	0.612	0.71	0.169	0.781	0.536	0.496	0.615	0.549	0.697	0.55	0.588	0.672	0.728	0.596	0.746	0.487	0.702	0.679	0.764	0.713
musculoskeletal diseases	D009140	0.301	0.613	0.167	0.71	0.648	0.55	0.639	0.634	0.21	0.406	0.401	0.565	0.648	0.657	0.609	0.668	0.438	0.556	0.426	0.359	0.479	0.776	0.533	0.505	0.495	0.648	0.529	0.711	0.555	0.73	0.165	0.801	0.5	0.458	0.598	0.549	0.667	0.519	0.602	0.671	0.72	0.582	0.834	0.435	0.698	0.717	0.78	0.749
mycobacterium infections	D009164	0.317	0.664	0.148	0.566	0.524	0.585	0.622	0.683	0.188	0.456	0.331	0.562	0.608	0.599	0.639	0.565	0.464	0.565	0.454	0.438	0.534	0.59	0.515	0.516	0.559	0.584	0.536	0.599	0.536	0.643	0.187	0.56	0.545	0.492	0.622	0.517	0.714	0.508	0.66	0.659	0.642	0.609	0.517	0.38	0.617	0.546	0.526	0.658
myocardial infarction	D009203	0.42	0.459	0.289	0.472	0.5	0.495	0.489	0.434	0.308	0.423	0.377	0.478	0.468	0.478	0.438	0.489	0.394	0.446	0.457	0.473	0.499	0.424	0.508	0.404	0.463	0.482	0.508	0.467	0.495	0.44	0.29	0.434	0.545	0.436	0.504	0.478	0.464	0.485	0.47	0.425	0.449	0.474	0.42	0.488	0.489	0.407	0.431	0.423
myocardial ischemia	D017202	0.325	0.595	0.187	0.641	0.658	0.611	0.587	0.59	0.239	0.472	0.424	0.6	0.615	0.628	0.585	0.64	0.475	0.579	0.453	0.377	0.534	0.61	0.578	0.536	0.545	0.627	0.588	0.644	0.61	0.6	0.215	0.615	0.592	0.533	0.596	0.596	0.624	0.567	0.599	0.59	0.618	0.587	0.59	0.519	0.633	0.609	0.622	0.588
neoplasms by histologic type	D009370	0.312	0.61	0.167	0.697	0.656	0.57	0.632	0.633	0.224	0.409	0.374	0.569	0.664	0.666	0.614	0.665	0.439	0.555	0.419	0.365	0.506	0.789	0.533	0.514	0.504	0.644	0.536	0.706	0.569	0.723	0.179	0.823	0.522	0.472	0.588	0.56	0.67	0.511	0.593	0.669	0.718	0.582	0.84	0.43	0.67	0.704	0.786	0.724
neoplasms by site	D009371	0.314	0.609	0.174	0.702	0.675	0.569	0.634	0.63	0.235	0.403	0.376	0.576	0.684	0.672	0.614	0.67	0.437	0.555	0.424	0.364	0.504	0.776	0.542	0.51	0.502	0.656	0.545	0.713	0.578	0.73	0.189	0.823	0.517	0.472	0.591	0.562	0.67	0.514	0.591	0.661	0.724	0.579	0.819	0.429	0.673	0.708	0.786	0.709
neoplasms, connective and soft tissue	D018204	0.321	0.646	0.181	0.71	0.676	0.619	0.639	0.66	0.245	0.442	0.391	0.613	0.724	0.684	0.653	0.69	0.438	0.561	0.439	0.389	0.509	0.727	0.565	0.539	0.532	0.672	0.601	0.686	0.59	0.709	0.202	0.755	0.567	0.494	0.633	0.573	0.689	0.562	0.612	0.681	0.714	0.611	0.713	0.451	0.685	0.665	0.723	0.693
neoplasms, connective tissue	D009372	0.337	0.645	0.188	0.688	0.653	0.614	0.634	0.638	0.261	0.45	0.393	0.634	0.675	0.681	0.653	0.682	0.428	0.548	0.438	0.408	0.512	0.684	0.571	0.538	0.531	0.674	0.62	0.661	0.593	0.673	0.22	0.707	0.575	0.488	0.632	0.571	0.679	0.577	0.616	0.662	0.692	0.621	0.645	0.443	0.669	0.636	0.683	0.657
neoplasms, glandular and epithelial	D009375	0.319	0.626	0.165	0.717	0.68	0.591	0.652	0.634	0.229	0.421	0.384	0.592	0.693	0.677	0.623	0.666	0.464	0.555	0.436	0.375	0.52	0.757	0.546	0.525	0.527	0.661	0.564	0.707	0.605	0.709	0.184	0.787	0.548	0.484	0.601	0.558	0.681	0.521	0.611	0.668	0.715	0.585	0.775	0.451	0.674	0.688	0.76	0.707
neoplasms, nerve tissue	D009380	0.333	0.623	0.187	0.696	0.699	0.597	0.647	0.62	0.252	0.433	0.388	0.606	0.67	0.679	0.632	0.676	0.477	0.566	0.451	0.397	0.523	0.714	0.553	0.531	0.526	0.678	0.591	0.697	0.621	0.703	0.206	0.754	0.603	0.499	0.616	0.578	0.675	0.555	0.6	0.649	0.724	0.593	0.708	0.463	0.669	0.656	0.719	0.671
neoplasms, neuroepithelial	D018302	0.34	0.634	0.184	0.689	0.698	0.609	0.646	0.625	0.248	0.439	0.394	0.616	0.666	0.675	0.641	0.66	0.497	0.568	0.453	0.41	0.528	0.688	0.548	0.541	0.53	0.682	0.586	0.676	0.635	0.677	0.209	0.72	0.585	0.5	0.614	0.572	0.673	0.568	0.614	0.646	0.69	0.6	0.677	0.471	0.664	0.641	0.697	0.662
neoplastic syndromes, hereditary	D009386	0.32	0.606	0.171	0.714	0.665	0.581	0.636	0.607	0.239	0.412	0.392	0.576	0.687	0.672	0.612	0.664	0.454	0.552	0.44	0.368	0.51	0.731	0.544	0.504	0.511	0.636	0.572	0.68	0.611	0.681	0.181	0.765	0.555	0.479	0.584	0.55	0.66	0.522	0.579	0.643	0.709	0.58	0.725	0.448	0.662	0.651	0.727	0.666
nervous system malformations	D009421	0.337	0.612	0.191	0.695	0.682	0.575	0.645	0.635	0.219	0.403	0.405	0.594	0.649	0.67	0.624	0.681	0.531	0.579	0.413	0.362	0.521	0.74	0.564	0.519	0.5	0.636	0.543	0.708	0.575	0.698	0.172	0.764	0.517	0.47	0.574	0.576	0.662	0.513	0.595	0.644	0.706	0.589	0.766	0.456	0.658	0.696	0.765	0.709
neurobehavioral manifestations	D019954	0.345	0.592	0.225	0.676	0.685	0.567	0.622	0.619	0.265	0.411	0.375	0.561	0.633	0.696	0.588	0.697	0.441	0.575	0.426	0.37	0.507	0.748	0.562	0.519	0.508	0.686	0.546	0.699	0.557	0.715	0.198	0.77	0.528	0.468	0.594	0.601	0.693	0.517	0.576	0.639	0.718	0.564	0.758	0.438	0.654	0.689	0.755	0.682
neuroectodermal tumors	D017599	0.339	0.621	0.191	0.686	0.701	0.604	0.644	0.622	0.259	0.434	0.38	0.604	0.666	0.675	0.63	0.668	0.476	0.561	0.448	0.399	0.529	0.708	0.554	0.536	0.525	0.682	0.593	0.688	0.618	0.701	0.212	0.748	0.608	0.5	0.611	0.581	0.676	0.554	0.607	0.648	0.695	0.59	0.699	0.459	0.663	0.651	0.709	0.667
neurologic manifestations	D009461	0.338	0.573	0.209	0.671	0.668	0.554	0.606	0.606	0.25	0.416	0.385	0.536	0.621	0.671	0.568	0.676	0.437	0.559	0.411	0.346	0.495	0.752	0.532	0.517	0.496	0.654	0.522	0.704	0.544	0.715	0.19	0.791	0.504	0.454	0.569	0.581	0.659	0.496	0.56	0.626	0.699	0.55	0.794	0.434	0.638	0.701	0.77	0.684
neuromuscular diseases	D009468	0.329	0.581	0.187	0.67	0.657	0.542	0.618	0.612	0.229	0.411	0.412	0.545	0.619	0.653	0.577	0.661	0.478	0.575	0.386	0.331	0.504	0.755	0.516	0.526	0.476	0.623	0.511	0.708	0.535	0.713	0.177	0.816	0.495	0.432	0.562	0.561	0.634	0.49	0.577	0.63	0.706	0.566	0.8	0.408	0.642	0.745	0.809	0.698
nevi and melanomas	D018326	0.355	0.556	0.204	0.58	0.589	0.602	0.55	0.558	0.264	0.443	0.381	0.558	0.591	0.603	0.552	0.584	0.403	0.488	0.504	0.442	0.492	0.55	0.515	0.479	0.559	0.592	0.661	0.562	0.57	0.568	0.234	0.568	0.663	0.521	0.561	0.515	0.6	0.534	0.529	0.542	0.574	0.53	0.495	0.442	0.556	0.48	0.538	0.528
nutrition disorders	D009748	0.309	0.588	0.188	0.63	0.615	0.546	0.612	0.615	0.234	0.481	0.387	0.556	0.607	0.631	0.696	0.61	0.412	0.578	0.461	0.385	0.495	0.634	0.554	0.54	0.54	0.653	0.542	0.638	0.559	0.64	0.215	0.612	0.59	0.513	0.629	0.578	0.699	0.561	0.595	0.649	0.642	0.61	0.587	0.449	0.652	0.583	0.603	0.663
nutritional and metabolic diseases	D009750	0.305	0.544	0.212	0.634	0.626	0.52	0.578	0.586	0.229	0.373	0.354	0.523	0.586	0.635	0.573	0.64	0.406	0.554	0.376	0.337	0.467	0.759	0.524	0.473	0.467	0.629	0.49	0.691	0.492	0.716	0.184	0.792	0.468	0.428	0.556	0.555	0.641	0.476	0.545	0.61	0.661	0.528	0.849	0.393	0.628	0.721	0.782	0.704
ocular motility disorders	D015835	0.383	0.487	0.225	0.567	0.589	0.582	0.487	0.487	0.271	0.496	0.567	0.476	0.525	0.551	0.471	0.553	0.5	0.46	0.452	0.365	0.57	0.509	0.501	0.518	0.51	0.522	0.548	0.553	0.575	0.522	0.203	0.525	0.546	0.482	0.525	0.53	0.501	0.53	0.493	0.488	0.515	0.507	0.486	0.506	0.522	0.474	0.535	0.47
orbital diseases	D009916	0.398	0.448	0.191	0.418	0.378	0.451	0.413	0.421	0.154	0.426	0.356	0.422	0.453	0.428	0.422	0.399	0.392	0.408	0.657	0.462	0.404	0.386	0.383	0.356	0.413	0.399	0.438	0.409	0.469	0.385	0.177	0.376	0.451	0.393	0.45	0.367	0.409	0.423	0.443	0.409	0.435	0.399	0.345	0.422	0.417	0.33	0.359	0.381
osteochondrodysplasias	D010009	0.335	0.652	0.177	0.738	0.674	0.586	0.671	0.676	0.237	0.457	0.395	0.611	0.683	0.704	0.657	0.703	0.454	0.593	0.451	0.388	0.528	0.733	0.57	0.559	0.547	0.684	0.584	0.727	0.617	0.715	0.19	0.724	0.556	0.489	0.639	0.597	0.692	0.608	0.656	0.69	0.73	0.642	0.712	0.47	0.715	0.693	0.73	0.725
otorhinolaryngologic diseases	D010038	0.363	0.582	0.157	0.612	0.581	0.536	0.596	0.564	0.236	0.423	0.472	0.57	0.627	0.583	0.569	0.617	0.483	0.52	0.42	0.366	0.51	0.57	0.471	0.541	0.489	0.554	0.54	0.585	0.588	0.554	0.159	0.591	0.541	0.451	0.56	0.525	0.571	0.487	0.545	0.559	0.61	0.566	0.545	0.5	0.558	0.541	0.587	0.562
overweight	D050177	0.31	0.588	0.181	0.585	0.572	0.538	0.584	0.585	0.243	0.484	0.37	0.558	0.58	0.585	0.71	0.552	0.405	0.554	0.476	0.394	0.492	0.59	0.542	0.522	0.531	0.632	0.529	0.589	0.551	0.604	0.243	0.561	0.604	0.539	0.629	0.54	0.693	0.556	0.576	0.631	0.604	0.582	0.536	0.452	0.613	0.53	0.551	0.622
parkinsonian disorders	D020734	0.305	0.541	0.173	0.612	0.569	0.502	0.582	0.586	0.267	0.369	0.337	0.502	0.58	0.627	0.524	0.619	0.403	0.538	0.384	0.329	0.502	0.647	0.493	0.521	0.471	0.615	0.478	0.649	0.537	0.614	0.193	0.674	0.481	0.447	0.528	0.531	0.6	0.458	0.567	0.59	0.619	0.54	0.664	0.362	0.612	0.752	0.71	0.618
pathologic processes	D010335	0.299	0.579	0.161	0.728	0.628	0.547	0.612	0.595	0.193	0.442	0.469	0.537	0.641	0.635	0.582	0.674	0.428	0.543	0.446	0.348	0.46	0.689	0.549	0.548	0.484	0.618	0.542	0.685	0.568	0.678	0.154	0.736	0.501	0.427	0.575	0.543	0.619	0.524	0.551	0.63	0.681	0.573	0.695	0.441	0.669	0.647	0.71	0.673
pathological conditions, anatomical	D020763	0.301	0.573	0.17	0.616	0.531	0.554	0.541	0.528	0.267	0.494	0.466	0.569	0.579	0.54	0.549	0.542	0.449	0.503	0.469	0.405	0.509	0.493	0.483	0.469	0.514	0.54	0.605	0.517	0.605	0.483	0.235	0.508	0.574	0.489	0.543	0.506	0.528	0.541	0.513	0.519	0.545	0.557	0.462	0.523	0.556	0.468	0.521	0.497
pathological conditions, signs and symptoms	D013568	0.315	0.581	0.171	0.711	0.642	0.55	0.617	0.602	0.203	0.427	0.423	0.546	0.634	0.644	0.604	0.672	0.434	0.559	0.426	0.349	0.47	0.737	0.526	0.523	0.485	0.648	0.517	0.703	0.546	0.709	0.159	0.783	0.494	0.432	0.571	0.544	0.664	0.509	0.558	0.645	0.712	0.568	0.785	0.429	0.667	0.691	0.764	0.715
peripheral nervous system diseases	D010523	0.348	0.609	0.196	0.667	0.673	0.565	0.64	0.637	0.231	0.432	0.391	0.579	0.628	0.67	0.612	0.68	0.547	0.617	0.393	0.34	0.52	0.732	0.537	0.538	0.488	0.633	0.528	0.709	0.565	0.7	0.18	0.762	0.529	0.454	0.581	0.601	0.646	0.502	0.612	0.641	0.716	0.602	0.744	0.434	0.647	0.723	0.756	0.694
peroxisomal disorders	D018901	0.365	0.376	0.289	0.429	0.487	0.434	0.393	0.401	0.272	0.344	0.339	0.444	0.406	0.435	0.42	0.502	0.471	0.452	0.294	0.355	0.515	0.409	0.414	0.415	0.408	0.477	0.414	0.429	0.454	0.436	0.191	0.442	0.448	0.409	0.442	0.579	0.442	0.402	0.389	0.386	0.41	0.396	0.424	0.401	0.423	0.433	0.441	0.396
pigmentation disorders	D010859	0.346	0.655	0.192	0.679	0.65	0.657	0.635	0.666	0.257	0.45	0.384	0.612	0.686	0.694	0.645	0.691	0.464	0.561	0.466	0.408	0.575	0.701	0.548	0.521	0.57	0.673	0.583	0.682	0.606	0.697	0.207	0.703	0.565	0.542	0.617	0.594	0.681	0.556	0.637	0.652	0.697	0.602	0.641	0.461	0.642	0.634	0.679	0.667
precursor cell lymphoblastic leukemia-lymphoma	D054198	0.344	0.657	0.182	0.66	0.658	0.649	0.641	0.663	0.249	0.44	0.393	0.631	0.673	0.667	0.651	0.625	0.484	0.588	0.449	0.394	0.556	0.693	0.568	0.541	0.522	0.641	0.577	0.655	0.597	0.687	0.21	0.685	0.577	0.526	0.606	0.59	0.68	0.577	0.632	0.675	0.692	0.614	0.643	0.46	0.653	0.604	0.666	0.664
prostatic diseases	D011469	0.355	0.601	0.192	0.623	0.652	0.606	0.588	0.567	0.265	0.453	0.398	0.574	0.627	0.626	0.575	0.604	0.472	0.56	0.483	0.416	0.535	0.595	0.537	0.511	0.527	0.601	0.58	0.603	0.637	0.592	0.225	0.629	0.592	0.502	0.583	0.538	0.6	0.571	0.555	0.581	0.617	0.558	0.569	0.512	0.589	0.57	0.627	0.573
proteostasis deficiencies	D057165	0.326	0.619	0.178	0.634	0.633	0.564	0.633	0.626	0.245	0.394	0.371	0.571	0.634	0.669	0.596	0.64	0.467	0.597	0.371	0.327	0.514	0.718	0.507	0.526	0.491	0.607	0.501	0.698	0.524	0.689	0.186	0.77	0.498	0.427	0.582	0.583	0.62	0.474	0.599	0.626	0.685	0.562	0.729	0.385	0.637	0.809	0.796	0.682
purine-pyrimidine metabolism, inborn errors	D011686	0.306	0.337	0.374	0.288	0.34	0.367	0.317	0.326	0.253	0.293	0.222	0.377	0.328	0.325	0.357	0.362	0.307	0.341	0.336	0.38	0.38	0.308	0.369	0.28	0.359	0.341	0.355	0.308	0.287	0.338	0.211	0.313	0.379	0.305	0.321	0.372	0.303	0.365	0.319	0.293	0.317	0.31	0.299	0.363	0.303	0.298	0.297	0.299
rectal diseases	D012002	0.329	0.649	0.184	0.717	0.674	0.6	0.658	0.637	0.247	0.437	0.398	0.616	0.694	0.693	0.646	0.705	0.442	0.567	0.465	0.402	0.532	0.708	0.589	0.542	0.53	0.689	0.586	0.707	0.62	0.705	0.202	0.746	0.557	0.492	0.625	0.576	0.681	0.554	0.62	0.658	0.743	0.614	0.698	0.458	0.685	0.652	0.72	0.674
renal tubular transport, inborn errors	D015499	0.318	0.573	0.186	0.662	0.645	0.547	0.625	0.632	0.228	0.488	0.424	0.541	0.62	0.647	0.58	0.645	0.401	0.564	0.458	0.376	0.483	0.656	0.668	0.549	0.529	0.651	0.571	0.719	0.564	0.681	0.19	0.634	0.544	0.439	0.659	0.585	0.633	0.604	0.603	0.617	0.643	0.613	0.634	0.426	0.655	0.63	0.636	0.685
respiratory hypersensitivity	D012130	0.373	0.557	0.209	0.545	0.551	0.544	0.553	0.544	0.282	0.401	0.42	0.533	0.577	0.527	0.535	0.531	0.419	0.507	0.442	0.37	0.476	0.508	0.484	0.45	0.511	0.499	0.5	0.514	0.514	0.511	0.222	0.504	0.532	0.45	0.561	0.493	0.511	0.475	0.535	0.524	0.537	0.52	0.472	0.487	0.524	0.468	0.505	0.505
respiratory tract neoplasms	D012142	0.337	0.658	0.17	0.664	0.651	0.618	0.662	0.664	0.242	0.482	0.385	0.653	0.722	0.68	0.653	0.666	0.442	0.578	0.448	0.401	0.55	0.678	0.549	0.569	0.56	0.674	0.62	0.668	0.625	0.682	0.213	0.694	0.586	0.488	0.64	0.583	0.672	0.546	0.672	0.674	0.683	0.66	0.632	0.432	0.662	0.629	0.646	0.67
retinal degeneration	D012162	0.335	0.642	0.174	0.661	0.624	0.6	0.65	0.654	0.233	0.442	0.421	0.589	0.646	0.688	0.613	0.674	0.492	0.569	0.419	0.357	0.528	0.709	0.526	0.555	0.527	0.62	0.526	0.74	0.553	0.667	0.169	0.696	0.534	0.473	0.58	0.592	0.646	0.511	0.636	0.661	0.694	0.61	0.697	0.477	0.656	0.693	0.709	0.7
retinal dystrophies	D058499	0.353	0.582	0.176	0.631	0.621	0.577	0.584	0.569	0.229	0.458	0.467	0.566	0.622	0.612	0.558	0.643	0.488	0.55	0.437	0.356	0.54	0.616	0.504	0.547	0.505	0.582	0.529	0.644	0.55	0.582	0.152	0.631	0.53	0.437	0.534	0.566	0.569	0.533	0.566	0.564	0.631	0.565	0.611	0.527	0.59	0.602	0.631	0.586
sensation disorders	D012678	0.35	0.538	0.169	0.57	0.552	0.516	0.535	0.517	0.242	0.487	0.481	0.534	0.585	0.554	0.503	0.585	0.496	0.507	0.431	0.344	0.514	0.519	0.474	0.566	0.518	0.513	0.533	0.563	0.592	0.505	0.175	0.537	0.535	0.441	0.529	0.524	0.508	0.511	0.504	0.499	0.54	0.537	0.505	0.56	0.516	0.506	0.532	0.498
signs and symptoms	D012816	0.342	0.6	0.186	0.695	0.666	0.572	0.635	0.623	0.226	0.456	0.416	0.573	0.643	0.67	0.64	0.685	0.459	0.583	0.43	0.353	0.503	0.742	0.534	0.535	0.517	0.691	0.523	0.717	0.557	0.72	0.175	0.757	0.522	0.455	0.594	0.571	0.711	0.526	0.589	0.666	0.733	0.588	0.755	0.436	0.667	0.703	0.756	0.727
skin abnormalities	D012868	0.353	0.64	0.22	0.674	0.672	0.628	0.619	0.628	0.251	0.405	0.39	0.64	0.675	0.7	0.625	0.769	0.46	0.539	0.422	0.375	0.538	0.71	0.551	0.518	0.55	0.653	0.554	0.693	0.579	0.699	0.203	0.728	0.543	0.522	0.584	0.616	0.661	0.524	0.585	0.633	0.706	0.567	0.687	0.454	0.64	0.653	0.712	0.653
skin and connective tissue diseases	D017437	0.314	0.62	0.185	0.678	0.648	0.568	0.638	0.652	0.223	0.395	0.349	0.575	0.648	0.68	0.62	0.694	0.438	0.561	0.399	0.355	0.496	0.809	0.522	0.53	0.498	0.651	0.516	0.718	0.535	0.768	0.181	0.814	0.498	0.482	0.591	0.578	0.688	0.496	0.624	0.689	0.733	0.584	0.85	0.393	0.678	0.74	0.78	0.769
skin diseases, papulosquamous	D017444	0.303	0.692	0.147	0.585	0.557	0.582	0.707	0.721	0.219	0.446	0.331	0.602	0.636	0.616	0.687	0.564	0.473	0.575	0.415	0.362	0.517	0.647	0.51	0.548	0.535	0.639	0.528	0.633	0.536	0.686	0.22	0.601	0.542	0.526	0.65	0.551	0.73	0.506	0.849	0.73	0.691	0.695	0.588	0.383	0.675	0.66	0.572	0.754
skin diseases, vascular	D017445	0.287	0.298	0.23	0.268	0.288	0.32	0.294	0.313	0.268	0.285	0.299	0.301	0.261	0.324	0.303	0.31	0.333	0.307	0.296	0.347	0.317	0.303	0.404	0.305	0.366	0.303	0.285	0.345	0.255	0.303	0.235	0.278	0.337	0.277	0.317	0.357	0.282	0.286	0.292	0.297	0.28	0.301	0.284	0.255	0.3	0.3	0.276	0.302
sleep disorders	D012893	0.329	0.556	0.185	0.609	0.638	0.6	0.567	0.569	0.253	0.419	0.412	0.527	0.583	0.63	0.55	0.599	0.478	0.533	0.476	0.397	0.497	0.578	0.535	0.516	0.479	0.611	0.547	0.605	0.603	0.592	0.187	0.598	0.534	0.501	0.579	0.555	0.597	0.545	0.536	0.578	0.598	0.554	0.574	0.484	0.597	0.56	0.604	0.563
spinal diseases	D013122	0.319	0.673	0.169	0.629	0.585	0.584	0.69	0.682	0.234	0.455	0.361	0.611	0.685	0.642	0.673	0.612	0.441	0.551	0.443	0.379	0.551	0.649	0.547	0.553	0.58	0.675	0.56	0.647	0.571	0.66	0.227	0.619	0.568	0.524	0.632	0.561	0.675	0.551	0.822	0.698	0.695	0.696	0.609	0.423	0.722	0.681	0.609	0.716
spinocerebellar degenerations	D013132	0.371	0.557	0.21	0.606	0.639	0.592	0.547	0.574	0.295	0.496	0.431	0.511	0.58	0.641	0.514	0.624	0.482	0.544	0.422	0.345	0.559	0.592	0.529	0.571	0.509	0.586	0.536	0.632	0.588	0.612	0.218	0.63	0.53	0.475	0.537	0.589	0.564	0.511	0.542	0.549	0.598	0.536	0.587	0.439	0.573	0.591	0.638	0.547
spondylarthritis	D025241	0.323	0.67	0.16	0.572	0.55	0.573	0.681	0.679	0.24	0.462	0.355	0.596	0.623	0.598	0.649	0.551	0.442	0.531	0.435	0.369	0.534	0.608	0.51	0.539	0.556	0.63	0.537	0.607	0.549	0.612	0.249	0.57	0.553	0.526	0.627	0.536	0.64	0.528	0.859	0.68	0.655	0.686	0.559	0.424	0.655	0.642	0.55	0.687
spondylitis	D013166	0.323	0.67	0.16	0.572	0.55	0.573	0.681	0.679	0.24	0.462	0.355	0.596	0.623	0.598	0.649	0.551	0.442	0.531	0.435	0.369	0.534	0.608	0.51	0.539	0.556	0.63	0.537	0.607	0.549	0.612	0.249	0.57	0.553	0.526	0.627	0.536	0.64	0.528	0.859	0.68	0.655	0.686	0.559	0.424	0.655	0.642	0.55	0.687
stomatognathic diseases	D009057	0.35	0.574	0.168	0.616	0.564	0.559	0.559	0.534	0.237	0.444	0.424	0.6	0.627	0.593	0.565	0.58	0.501	0.52	0.53	0.412	0.531	0.537	0.536	0.478	0.564	0.569	0.583	0.574	0.603	0.513	0.18	0.54	0.6	0.493	0.56	0.528	0.557	0.556	0.533	0.533	0.577	0.562	0.503	0.554	0.571	0.502	0.535	0.512
stomatognathic system abnormalities	D018640	0.356	0.539	0.176	0.574	0.521	0.53	0.518	0.477	0.241	0.428	0.426	0.575	0.595	0.551	0.52	0.545	0.473	0.456	0.49	0.416	0.507	0.488	0.479	0.456	0.536	0.515	0.583	0.521	0.577	0.47	0.195	0.496	0.585	0.475	0.515	0.481	0.515	0.533	0.487	0.486	0.53	0.527	0.456	0.539	0.526	0.448	0.486	0.463
tauopathies	D024801	0.345	0.582	0.188	0.607	0.61	0.553	0.614	0.589	0.274	0.395	0.359	0.55	0.61	0.653	0.587	0.629	0.452	0.711	0.429	0.363	0.522	0.643	0.524	0.532	0.503	0.629	0.508	0.65	0.556	0.621	0.2	0.679	0.535	0.448	0.576	0.568	0.609	0.5	0.583	0.593	0.633	0.576	0.652	0.393	0.616	0.699	0.723	0.619
tdp-43 proteinopathies	D057177	0.341	0.603	0.195	0.612	0.626	0.58	0.615	0.612	0.264	0.417	0.392	0.559	0.614	0.65	0.574	0.63	0.485	0.548	0.379	0.33	0.541	0.652	0.505	0.522	0.511	0.587	0.524	0.672	0.537	0.651	0.202	0.695	0.526	0.451	0.569	0.566	0.596	0.489	0.588	0.593	0.649	0.563	0.649	0.405	0.607	0.675	0.736	0.628
thoracic neoplasms	D013899	0.332	0.657	0.168	0.665	0.65	0.616	0.662	0.667	0.244	0.481	0.396	0.651	0.718	0.679	0.653	0.67	0.435	0.577	0.448	0.399	0.545	0.684	0.552	0.571	0.557	0.677	0.614	0.678	0.618	0.686	0.214	0.7	0.583	0.489	0.644	0.584	0.675	0.557	0.667	0.682	0.689	0.656	0.638	0.434	0.664	0.633	0.651	0.674
urination disorders	D014555	0.342	0.38	0.209	0.396	0.378	0.372	0.386	0.347	0.235	0.417	0.399	0.397	0.411	0.416	0.382	0.418	0.378	0.382	0.476	0.4	0.482	0.371	0.427	0.344	0.445	0.38	0.443	0.399	0.436	0.375	0.174	0.378	0.423	0.313	0.409	0.395	0.379	0.447	0.365	0.365	0.388	0.409	0.358	0.39	0.394	0.344	0.37	0.367
urogenital neoplasms	D014565	0.329	0.625	0.183	0.69	0.687	0.589	0.642	0.625	0.257	0.408	0.366	0.587	0.709	0.684	0.627	0.67	0.441	0.561	0.438	0.375	0.522	0.753	0.538	0.521	0.509	0.669	0.561	0.695	0.584	0.714	0.204	0.8	0.534	0.49	0.603	0.567	0.678	0.523	0.595	0.656	0.718	0.587	0.77	0.439	0.663	0.693	0.759	0.69
urologic diseases	D014570	0.3	0.602	0.166	0.715	0.651	0.561	0.642	0.639	0.21	0.417	0.398	0.572	0.681	0.67	0.613	0.672	0.433	0.562	0.429	0.355	0.488	0.761	0.579	0.523	0.51	0.645	0.556	0.733	0.565	0.723	0.167	0.765	0.514	0.448	0.616	0.575	0.662	0.53	0.588	0.653	0.711	0.58	0.79	0.426	0.683	0.715	0.756	0.743
urologic neoplasms	D014571	0.325	0.605	0.179	0.677	0.662	0.608	0.611	0.597	0.276	0.423	0.388	0.598	0.731	0.663	0.613	0.648	0.443	0.523	0.461	0.403	0.542	0.642	0.56	0.524	0.548	0.655	0.655	0.626	0.63	0.631	0.219	0.67	0.59	0.528	0.61	0.553	0.667	0.558	0.595	0.608	0.657	0.577	0.622	0.486	0.634	0.597	0.649	0.613
uveal diseases	D014603	0.342	0.415	0.283	0.503	0.516	0.441	0.393	0.427	0.293	0.468	0.48	0.442	0.432	0.445	0.415	0.484	0.432	0.393	0.412	0.363	0.451	0.408	0.468	0.411	0.477	0.436	0.45	0.436	0.543	0.423	0.234	0.43	0.472	0.418	0.428	0.477	0.409	0.523	0.394	0.392	0.415	0.415	0.405	0.507	0.431	0.401	0.432	0.395
vision disorders	D014786	0.341	0.536	0.167	0.577	0.547	0.517	0.528	0.515	0.247	0.504	0.466	0.532	0.568	0.559	0.505	0.594	0.488	0.505	0.434	0.35	0.508	0.52	0.483	0.576	0.51	0.519	0.544	0.559	0.589	0.508	0.18	0.542	0.542	0.443	0.536	0.51	0.515	0.52	0.502	0.504	0.548	0.531	0.504	0.561	0.518	0.509	0.536	0.496
[truncated: 685 more columns]
