# Supplementary material for: Conserved Disease Modules Extracted From Multilayer Heterogeneous Disease and Gene Networks for Understanding Disease Mechanisms and Predicting Disease Treatments
Source: Front Genet. 2019 Jan 18;9:745. doi: 10.3389/fgene.2018.00745 (PMC6346701; doi:10.3389/fgene.2018.00745)
Supplement: Table S4 — Human diseases similarity data based on DO terms. [file Table_4.XLSX]

## Sheet: Sheet1
		Histiocytoma, Benign Fibrous	Arthropathy, Neurogenic	Alzheimer Disease	Classical Lissencephalies and Subcortical Band Heterotopias	Liposarcoma	Mitral Valve Prolapse	Gallbladder Neoplasms	Port-Wine Stain	Pituitary Neoplasms	Vitreoretinopathy, Proliferative	Duodenal Diseases	Refractive Errors	Bipolar Disorder	Charcot-Marie-Tooth Disease	Gastrointestinal Hemorrhage	Respiratory Distress Syndrome, Adult	Ocular Motility Disorders	Gerstmann-Straussler-Scheinker Disease	Coloboma	Esophageal Neoplasms	Leukemia, Myeloid, Acute	Adrenocortical Hyperfunction	Paraganglioma	Lung Diseases, Obstructive	Disorders of Sex Development	Ectodermal Dysplasia 1, Anhidrotic	Myocardial Stunning	Macular Degeneration	Marfan Syndrome	Muscular Diseases	Common Variable Immunodeficiency	Smith-Lemli-Opitz Syndrome	Brachial Plexus Neuritis	Hyperemia	Aortic Valve Stenosis	Subacute Sclerosing Panencephalitis	Hyperparathyroidism	Enchondromatosis	Adrenal Cortex Diseases	Porphyrias	Eczema	Ellis-Van Creveld Syndrome	Retinal Vein Occlusion	Skin Diseases	Blepharophimosis	Neurotoxicity Syndromes	Myoclonic Epilepsy, Juvenile	Mitochondrial Diseases
Disease name	DOID	DOID:4415	DOID:14286	DOID:10652	DOID:0060402	DOID:3382	DOID:988	DOID:3121	DOID:2724	DOID:3829	DOID:9719	DOID:4072	DOID:9835	DOID:3312	DOID:10595	DOID:12612	DOID:11394	DOID:1279	DOID:4249	DOID:12270	DOID:5041	DOID:9119	DOID:3947	DOID:0050773	DOID:2320	DOID:3763	DOID:14793	DOID:9767	DOID:10871	DOID:14323	DOID:423	DOID:12177	DOID:14692	DOID:3689	DOID:1248	DOID:1712	DOID:8970	DOID:13543	DOID:4624	DOID:3952	DOID:13268	DOID:2723	DOID:12714	DOID:1727	DOID:37	DOID:10348	DOID:3602	DOID:4890	DOID:700
Histiocytoma, Benign Fibrous	DOID:4415	1	0.0262177	0.0322586	NA	0.458801	0.0322586	0.238225	NA	0.09999	0.0270641	0.0545214	0.0322586	0.0545214	0.0411723	NA	0.0322586	0.0411723	0.0322586	0.0322586	0.304051	0.163075	0.0411723	0.238225	0.0411723	0.0411723	0.0749632	0.0262177	0.0172584	0.0411723	0.0411723	0.0284379	0.0545214	0.0300073	0.0262177	0.0322586	0.0749632	0.0545214	0.10736	0.0545214	0.0749632	0.0545214	0.0411723	0.0322586	0.0749632	0.0262177	0.0749632	0.0220824	0.0749632
Arthropathy, Neurogenic	DOID:14286	0.0262177	1	0.0783424	NA	0.0262177	0.0783424	0.0322586	NA	0.0411723	0.065727	0.132409	0.0783424	0.0545214	0.09999	NA	0.0783424	0.09999	0.0783424	0.0783424	0.0411723	0.0220824	0.09999	0.0322586	0.09999	0.09999	0.0749632	0.0636715	0.0419131	0.0411723	0.184015	0.0690634	0.0545214	0.0728749	0.0636715	0.0783424	0.0749632	0.132409	0.10736	0.132409	0.0749632	0.132409	0.0411723	0.0783424	0.182054	0.0636715	0.182054	0.0536287	0.0749632
Alzheimer Disease	DOID:10652	0.0322586	0.0783424	1	NA	0.0322586	0.0934083	0.0384622	NA	0.0476199	0.143909	0.148977	0.171903	0.0613433	0.212832	NA	0.0934083	0.212832	0.284037	0.171903	0.0476199	0.0280133	0.115648	0.0384622	0.115648	0.115648	0.0823791	0.0783424	0.103074	0.0476199	0.115648	0.0822137	0.0613433	0.325918	0.144176	0.0934083	0.0823791	0.148977	0.115769	0.148977	0.0823791	0.148977	0.0476199	0.0934083	0.200064	0.144176	0.368184	0.206874	0.0823791
Classical Lissencephalies and Subcortical Band Heterotopias	DOID:0060402	NA	NA	NA	1	NA	NA	NA	NA	NA	NA	NA	NA	NA	NA	NA	NA	NA	NA	NA	NA	NA	NA	NA	NA	NA	NA	NA	NA	NA	NA	NA	NA	NA	NA	NA	NA	NA	NA	NA	NA	NA	NA	NA	NA	NA	NA	NA	NA
Liposarcoma	DOID:3382	0.458801	0.0262177	0.0322586	NA	1	0.0322586	0.238225	NA	0.09999	0.0270641	0.0545214	0.0322586	0.0545214	0.0411723	NA	0.0322586	0.0411723	0.0322586	0.0322586	0.304051	0.163075	0.0411723	0.238225	0.0411723	0.0411723	0.0749632	0.0262177	0.0172584	0.0411723	0.0411723	0.0284379	0.0545214	0.0300073	0.0262177	0.0322586	0.0749632	0.0545214	0.10736	0.0545214	0.0749632	0.0545214	0.0411723	0.0322586	0.0749632	0.0262177	0.0749632	0.0220824	0.0749632
Mitral Valve Prolapse	DOID:988	0.0322586	0.0783424	0.0934083	NA	0.0322586	1	0.0384622	NA	0.0476199	0.0781974	0.148977	0.0934083	0.0613433	0.115648	NA	0.0934083	0.115648	0.0934083	0.0934083	0.0476199	0.0280133	0.115648	0.0384622	0.115648	0.115648	0.0823791	0.144176	0.056008	0.0476199	0.115648	0.0822137	0.0613433	0.0839745	0.0783424	0.44423	0.0823791	0.148977	0.115769	0.148977	0.0823791	0.148977	0.0476199	0.171903	0.200064	0.0783424	0.200064	0.0680322	0.0823791
Gallbladder Neoplasms	DOID:3121	0.238225	0.0322586	0.0384622	NA	0.238225	0.0384622	1	NA	0.115648	0.0321989	0.0613433	0.0384622	0.0613433	0.0476199	NA	0.0384622	0.0476199	0.0384622	0.0384622	0.549999	0.206874	0.0476199	0.284037	0.0476199	0.0476199	0.0823791	0.0322586	0.0230621	0.0476199	0.0476199	0.0338527	0.0613433	0.0345777	0.0322586	0.0384622	0.0823791	0.0613433	0.115769	0.0613433	0.0823791	0.0613433	0.0476199	0.0384622	0.0823791	0.0322586	0.0823791	0.0280133	0.0823791
Port-Wine Stain	DOID:2724	NA	NA	NA	NA	NA	NA	NA	1	NA	NA	NA	NA	NA	NA	NA	NA	NA	NA	NA	NA	NA	NA	NA	NA	NA	NA	NA	NA	NA	NA	NA	NA	NA	NA	NA	NA	NA	NA	NA	NA	NA	NA	NA	NA	NA	NA	NA	NA
Pituitary Neoplasms	DOID:3829	0.09999	0.0411723	0.0476199	NA	0.09999	0.0476199	0.115648	NA	1	0.0397384	0.0714299	0.0476199	0.0714299	0.0571439	NA	0.0476199	0.0571439	0.0476199	0.0476199	0.138778	0.089279	0.0571439	0.115648	0.0571439	0.0571439	0.0933603	0.0411723	0.0316203	0.0571439	0.0571439	0.0418146	0.0714299	0.0412673	0.0411723	0.0476199	0.0933603	0.0714299	0.12825	0.0714299	0.0933603	0.0714299	0.0571439	0.0476199	0.0933603	0.0411723	0.0933603	0.0367619	0.0933603
Vitreoretinopathy, Proliferative	DOID:9719	0.0270641	0.065727	0.143909	NA	0.0270641	0.0781974	0.0321989	NA	0.0397384	1	0.12373	0.534733	0.0509475	0.177607	NA	0.0781974	0.177607	0.143909	0.534733	0.0397384	0.0235373	0.0965077	0.0321989	0.0965077	0.0965077	0.0679241	0.065727	0.43682	0.0397384	0.0965077	0.0701957	0.0509475	0.135087	0.445196	0.0781974	0.0679241	0.12373	0.0943727	0.12373	0.0679241	0.12373	0.0397384	0.0781974	0.164959	0.312584	0.303579	0.105197	0.0679241
Duodenal Diseases	DOID:4072	0.0545214	0.132409	0.148977	NA	0.0545214	0.148977	0.0613433	NA	0.0714299	0.12373	1	0.148977	0.0865818	0.173473	NA	0.148977	0.173473	0.148977	0.148977	0.0714299	0.049858	0.173473	0.0613433	0.173473	0.173473	0.109892	0.132409	0.107888	0.0714299	0.173473	0.130357	0.0865818	0.12426	0.132409	0.148977	0.109892	0.21027	0.147106	0.21027	0.109892	0.21027	0.0714299	0.148977	0.266882	0.132409	0.266882	0.121084	0.109892
Refractive Errors	DOID:9835	0.0322586	0.0783424	0.171903	NA	0.0322586	0.0934083	0.0384622	NA	0.0476199	0.534733	0.148977	1	0.0613433	0.212832	NA	0.0934083	0.212832	0.171903	0.673076	0.0476199	0.0280133	0.115648	0.0384622	0.115648	0.115648	0.0823791	0.0783424	0.40358	0.0476199	0.115648	0.0822137	0.0613433	0.154541	0.564516	0.0934083	0.0823791	0.148977	0.115769	0.148977	0.0823791	0.148977	0.0476199	0.0934083	0.200064	0.37258	0.368184	0.125202	0.0823791
Bipolar Disorder	DOID:3312	0.0545214	0.0545214	0.0613433	NA	0.0545214	0.0613433	0.0613433	NA	0.0714299	0.0509475	0.0865818	0.0613433	1	0.0714299	NA	0.0613433	0.0714299	0.0613433	0.0613433	0.0714299	0.049858	0.0714299	0.0613433	0.0714299	0.0714299	0.109892	0.0545214	0.0444246	0.0714299	0.0714299	0.0536764	0.0865818	0.051166	0.0545214	0.0613433	0.109892	0.0865818	0.147106	0.0865818	0.109892	0.0865818	0.0714299	0.0613433	0.109892	0.0545214	0.109892	0.049858	0.109892
Charcot-Marie-Tooth Disease	DOID:10595	0.0411723	0.09999	0.212832	NA	0.0411723	0.115648	0.0476199	NA	0.0571439	0.177607	0.173473	0.212832	0.0714299	1	NA	0.115648	0.421999	0.212832	0.212832	0.0571439	0.0367619	0.138778	0.0476199	0.138778	0.138778	0.0933603	0.09999	0.141323	0.0571439	0.138778	0.10155	0.0714299	0.304752	0.184015	0.115648	0.0933603	0.173473	0.12825	0.173473	0.0933603	0.173473	0.0571439	0.115648	0.226732	0.184015	0.417263	0.164303	0.0933603
Gastrointestinal Hemorrhage	DOID:12612	NA	NA	NA	NA	NA	NA	NA	NA	NA	NA	NA	NA	NA	NA	1	NA	NA	NA	NA	NA	NA	NA	NA	NA	NA	NA	NA	NA	NA	NA	NA	NA	NA	NA	NA	NA	NA	NA	NA	NA	NA	NA	NA	NA	NA	NA	NA	NA
Respiratory Distress Syndrome, Adult	DOID:11394	0.0322586	0.0783424	0.0934083	NA	0.0322586	0.0934083	0.0384622	NA	0.0476199	0.0781974	0.148977	0.0934083	0.0613433	0.115648	NA	1	0.115648	0.0934083	0.0934083	0.0476199	0.0280133	0.115648	0.0384622	0.549999	0.115648	0.0823791	0.0783424	0.056008	0.0476199	0.115648	0.0822137	0.0613433	0.0839745	0.0783424	0.0934083	0.0823791	0.148977	0.115769	0.148977	0.0823791	0.148977	0.0476199	0.0934083	0.200064	0.0783424	0.200064	0.0680322	0.0823791
Ocular Motility Disorders	DOID:1279	0.0411723	0.09999	0.212832	NA	0.0411723	0.115648	0.0476199	NA	0.0571439	0.177607	0.173473	0.212832	0.0714299	0.421999	NA	0.115648	1	0.212832	0.212832	0.0571439	0.0367619	0.138778	0.0476199	0.138778	0.138778	0.0933603	0.09999	0.141323	0.0571439	0.138778	0.10155	0.0714299	0.304752	0.184015	0.115648	0.0933603	0.173473	0.12825	0.173473	0.0933603	0.173473	0.0571439	0.115648	0.226732	0.184015	0.417263	0.164303	0.0933603
Gerstmann-Straussler-Scheinker Disease	DOID:4249	0.0322586	0.0783424	0.284037	NA	0.0322586	0.0934083	0.0384622	NA	0.0476199	0.143909	0.148977	0.171903	0.0613433	0.212832	NA	0.0934083	0.212832	1	0.171903	0.0476199	0.0280133	0.115648	0.0384622	0.115648	0.115648	0.0823791	0.0783424	0.103074	0.0476199	0.115648	0.0822137	0.0613433	0.225108	0.144176	0.0934083	0.0823791	0.148977	0.115769	0.148977	0.0823791	0.148977	0.0476199	0.0934083	0.200064	0.144176	0.368184	0.323547	0.0823791
Coloboma	DOID:12270	0.0322586	0.0783424	0.171903	NA	0.0322586	0.0934083	0.0384622	NA	0.0476199	0.534733	0.148977	0.673076	0.0613433	0.212832	NA	0.0934083	0.212832	0.171903	1	0.0476199	0.0280133	0.115648	0.0384622	0.115648	0.115648	0.0823791	0.0783424	0.40358	0.0476199	0.115648	0.0822137	0.0613433	0.154541	0.564516	0.0934083	0.0823791	0.148977	0.115769	0.148977	0.0823791	0.148977	0.0476199	0.0934083	0.200064	0.37258	0.368184	0.125202	0.0823791
Esophageal Neoplasms	DOID:5041	0.304051	0.0411723	0.0476199	NA	0.304051	0.0476199	0.549999	NA	0.138778	0.0397384	0.0714299	0.0476199	0.0714299	0.0571439	NA	0.0476199	0.0571439	0.0476199	0.0476199	1	0.271481	0.0571439	0.351665	0.0571439	0.0571439	0.0933603	0.0411723	0.0316203	0.0571439	0.0571439	0.0418146	0.0714299	0.0412673	0.0411723	0.0476199	0.0933603	0.0714299	0.12825	0.0714299	0.0933603	0.0714299	0.0571439	0.0476199	0.0933603	0.0411723	0.0933603	0.0367619	0.0933603
Leukemia, Myeloid, Acute	DOID:9119	0.163075	0.0220824	0.0280133	NA	0.163075	0.0280133	0.206874	NA	0.089279	0.0235373	0.049858	0.0280133	0.049858	0.0367619	NA	0.0280133	0.0367619	0.0280133	0.0280133	0.271481	1	0.0367619	0.206874	0.0367619	0.0367619	0.0698989	0.0220824	0.0132837	0.0367619	0.0367619	0.0247223	0.049858	0.0268613	0.0220824	0.0280133	0.0698989	0.049858	0.101627	0.049858	0.0698989	0.049858	0.0367619	0.0280133	0.0698989	0.0220824	0.0698989	0.0180216	0.0698989
Adrenocortical Hyperfunction	DOID:3947	0.0411723	0.09999	0.115648	NA	0.0411723	0.115648	0.0476199	NA	0.0571439	0.0965077	0.173473	0.115648	0.0714299	0.138778	NA	0.115648	0.138778	0.115648	0.115648	0.0571439	0.0367619	1	0.0476199	0.138778	0.255398	0.0933603	0.09999	0.0767921	0.0571439	0.138778	0.10155	0.0714299	0.10022	0.09999	0.115648	0.0933603	0.319248	0.12825	0.825	0.0933603	0.173473	0.0571439	0.115648	0.226732	0.09999	0.226732	0.089279	0.0933603
Paraganglioma	DOID:0050773	0.238225	0.0322586	0.0384622	NA	0.238225	0.0384622	0.284037	NA	0.115648	0.0321989	0.0613433	0.0384622	0.0613433	0.0476199	NA	0.0384622	0.0476199	0.0384622	0.0384622	0.351665	0.206874	0.0476199	1	0.0476199	0.0476199	0.0823791	0.0322586	0.0230621	0.0476199	0.0476199	0.0338527	0.0613433	0.0345777	0.0322586	0.0384622	0.0823791	0.0613433	0.115769	0.0613433	0.0823791	0.0613433	0.0476199	0.0384622	0.0823791	0.0322586	0.0823791	0.0280133	0.0823791
Lung Diseases, Obstructive	DOID:2320	0.0411723	0.09999	0.115648	NA	0.0411723	0.115648	0.0476199	NA	0.0571439	0.0965077	0.173473	0.115648	0.0714299	0.138778	NA	0.549999	0.138778	0.115648	0.115648	0.0571439	0.0367619	0.138778	0.0476199	1	0.138778	0.0933603	0.09999	0.0767921	0.0571439	0.138778	0.10155	0.0714299	0.10022	0.09999	0.115648	0.0933603	0.173473	0.12825	0.173473	0.0933603	0.173473	0.0571439	0.115648	0.226732	0.09999	0.226732	0.089279	0.0933603
Disorders of Sex Development	DOID:3763	0.0411723	0.09999	0.115648	NA	0.0411723	0.115648	0.0476199	NA	0.0571439	0.0965077	0.173473	0.115648	0.0714299	0.138778	NA	0.115648	0.138778	0.115648	0.115648	0.0571439	0.0367619	0.255398	0.0476199	0.138778	1	0.0933603	0.09999	0.0767921	0.0571439	0.138778	0.10155	0.0714299	0.10022	0.09999	0.115648	0.0933603	0.319248	0.12825	0.319248	0.0933603	0.173473	0.0571439	0.115648	0.226732	0.09999	0.226732	0.089279	0.0933603
Ectodermal Dysplasia 1, Anhidrotic	DOID:14793	0.0749632	0.0749632	0.0823791	NA	0.0749632	0.0823791	0.0823791	NA	0.0933603	0.0679241	0.109892	0.0823791	0.109892	0.0933603	NA	0.0823791	0.0933603	0.0823791	0.0823791	0.0933603	0.0698989	0.0933603	0.0823791	0.0933603	0.0933603	1	0.0749632	0.0640035	0.417263	0.0933603	0.0716984	0.109892	0.066053	0.0749632	0.0823791	0.135413	0.109892	0.176371	0.109892	0.135413	0.109892	0.417263	0.0823791	0.135413	0.0749632	0.135413	0.0698989	0.135413
Myocardial Stunning	DOID:9767	0.0262177	0.0636715	0.0783424	NA	0.0262177	0.144176	0.0322586	NA	0.0411723	0.065727	0.132409	0.0783424	0.0545214	0.09999	NA	0.0783424	0.09999	0.0783424	0.0783424	0.0411723	0.0220824	0.09999	0.0322586	0.09999	0.09999	0.0749632	1	0.0419131	0.0411723	0.09999	0.0690634	0.0545214	0.0728749	0.0636715	0.144176	0.0749632	0.132409	0.10736	0.132409	0.0749632	0.132409	0.0411723	0.238225	0.182054	0.0636715	0.182054	0.0536287	0.0749632
Macular Degeneration	DOID:10871	0.0172584	0.0419131	0.103074	NA	0.0172584	0.056008	0.0230621	NA	0.0316203	0.43682	0.107888	0.40358	0.0444246	0.141323	NA	0.056008	0.141323	0.103074	0.40358	0.0316203	0.0132837	0.0767921	0.0230621	0.0767921	0.0767921	0.0640035	0.0419131	1	0.0316203	0.0767921	0.0494913	0.0444246	0.103571	0.302016	0.056008	0.0640035	0.107888	0.094962	0.107888	0.0640035	0.107888	0.0316203	0.056008	0.155437	0.19933	0.286057	0.0593699	0.0640035
Marfan Syndrome	DOID:14323	0.0411723	0.0411723	0.0476199	NA	0.0411723	0.0476199	0.0476199	NA	0.0571439	0.0397384	0.0714299	0.0476199	0.0714299	0.0571439	NA	0.0476199	0.0571439	0.0476199	0.0476199	0.0571439	0.0367619	0.0571439	0.0476199	0.0571439	0.0571439	0.417263	0.0411723	0.0316203	1	0.0571439	0.0418146	0.0714299	0.0412673	0.0411723	0.0476199	0.0933603	0.0714299	0.12825	0.0714299	0.0933603	0.0714299	0.421999	0.0476199	0.0933603	0.0411723	0.0933603	0.0367619	0.0933603
Muscular Diseases	DOID:423	0.0411723	0.184015	0.115648	NA	0.0411723	0.115648	0.0476199	NA	0.0571439	0.0965077	0.173473	0.115648	0.0714299	0.138778	NA	0.115648	0.138778	0.115648	0.115648	0.0571439	0.0367619	0.138778	0.0476199	0.138778	0.138778	0.0933603	0.09999	0.0767921	0.0571439	1	0.10155	0.0714299	0.10022	0.09999	0.115648	0.0933603	0.173473	0.12825	0.173473	0.0933603	0.173473	0.0571439	0.115648	0.226732	0.09999	0.226732	0.089279	0.0933603
Common Variable Immunodeficiency	DOID:12177	0.0284379	0.0690634	0.0822137	NA	0.0284379	0.0822137	0.0338527	NA	0.0418146	0.0701957	0.130357	0.0822137	0.0536764	0.10155	NA	0.0822137	0.10155	0.0822137	0.0822137	0.0418146	0.0247223	0.10155	0.0338527	0.10155	0.10155	0.0716984	0.0690634	0.0494913	0.0418146	0.10155	1	0.0536764	0.0762843	0.0690634	0.0822137	0.0716984	0.130357	0.0999124	0.130357	0.0716984	0.130357	0.0418146	0.0822137	0.174125	0.0690634	0.174125	0.0600399	0.0716984
Smith-Lemli-Opitz Syndrome	DOID:14692	0.0545214	0.0545214	0.0613433	NA	0.0545214	0.0613433	0.0613433	NA	0.0714299	0.0509475	0.0865818	0.0613433	0.0865818	0.0714299	NA	0.0613433	0.0714299	0.0613433	0.0613433	0.0714299	0.049858	0.0714299	0.0613433	0.0714299	0.0714299	0.109892	0.0545214	0.0444246	0.0714299	0.0714299	0.0536764	1	0.051166	0.0545214	0.0613433	0.109892	0.0865818	0.147106	0.0865818	0.491152	0.0865818	0.0714299	0.0613433	0.109892	0.0545214	0.109892	0.049858	0.491152
Brachial Plexus Neuritis	DOID:3689	0.0300073	0.0728749	0.325918	NA	0.0300073	0.0839745	0.0345777	NA	0.0412673	0.135087	0.12426	0.154541	0.051166	0.304752	NA	0.0839745	0.304752	0.225108	0.154541	0.0412673	0.0268613	0.10022	0.0345777	0.10022	0.10022	0.066053	0.0728749	0.103571	0.0412673	0.10022	0.0762843	0.051166	1	0.134114	0.0839745	0.066053	0.12426	0.0889973	0.12426	0.066053	0.12426	0.0412673	0.0839745	0.160414	0.134114	0.295217	0.168627	0.066053
Hyperemia	DOID:1248	0.0262177	0.0636715	0.144176	NA	0.0262177	0.0783424	0.0322586	NA	0.0411723	0.445196	0.132409	0.564516	0.0545214	0.184015	NA	0.0783424	0.184015	0.144176	0.564516	0.0411723	0.0220824	0.09999	0.0322586	0.09999	0.09999	0.0749632	0.0636715	0.302016	0.0411723	0.09999	0.0690634	0.0545214	0.134114	1	0.0783424	0.0749632	0.132409	0.10736	0.132409	0.0749632	0.132409	0.0411723	0.0783424	0.182054	0.302808	0.33504	0.0986948	0.0749632
Aortic Valve Stenosis	DOID:1712	0.0322586	0.0783424	0.0934083	NA	0.0322586	0.44423	0.0384622	NA	0.0476199	0.0781974	0.148977	0.0934083	0.0613433	0.115648	NA	0.0934083	0.115648	0.0934083	0.0934083	0.0476199	0.0280133	0.115648	0.0384622	0.115648	0.115648	0.0823791	0.144176	0.056008	0.0476199	0.115648	0.0822137	0.0613433	0.0839745	0.0783424	1	0.0823791	0.148977	0.115769	0.148977	0.0823791	0.148977	0.0476199	0.171903	0.200064	0.0783424	0.200064	0.0680322	0.0823791
Subacute Sclerosing Panencephalitis	DOID:8970	0.0749632	0.0749632	0.0823791	NA	0.0749632	0.0823791	0.0823791	NA	0.0933603	0.0679241	0.109892	0.0823791	0.109892	0.0933603	NA	0.0823791	0.0933603	0.0823791	0.0823791	0.0933603	0.0698989	0.0933603	0.0823791	0.0933603	0.0933603	0.135413	0.0749632	0.0640035	0.0933603	0.0933603	0.0716984	0.109892	0.066053	0.0749632	0.0823791	1	0.109892	0.176371	0.109892	0.135413	0.109892	0.0933603	0.0823791	0.135413	0.0749632	0.135413	0.0698989	0.135413
Hyperparathyroidism	DOID:13543	0.0545214	0.132409	0.148977	NA	0.0545214	0.148977	0.0613433	NA	0.0714299	0.12373	0.21027	0.148977	0.0865818	0.173473	NA	0.148977	0.173473	0.148977	0.148977	0.0714299	0.049858	0.319248	0.0613433	0.173473	0.319248	0.109892	0.132409	0.107888	0.0714299	0.173473	0.130357	0.0865818	0.12426	0.132409	0.148977	0.109892	1	0.147106	0.386968	0.109892	0.21027	0.0714299	0.148977	0.266882	0.132409	0.266882	0.121084	0.109892
Enchondromatosis	DOID:4624	0.10736	0.10736	0.115769	NA	0.10736	0.115769	0.115769	NA	0.12825	0.0943727	0.147106	0.115769	0.147106	0.12825	NA	0.115769	0.12825	0.115769	0.115769	0.12825	0.101627	0.12825	0.115769	0.12825	0.12825	0.176371	0.10736	0.094962	0.12825	0.12825	0.0999124	0.147106	0.0889973	0.10736	0.115769	0.176371	0.147106	1	0.147106	0.176371	0.147106	0.12825	0.115769	0.176371	0.10736	0.176371	0.101627	0.176371
Adrenal Cortex Diseases	DOID:3952	0.0545214	0.132409	0.148977	NA	0.0545214	0.148977	0.0613433	NA	0.0714299	0.12373	0.21027	0.148977	0.0865818	0.173473	NA	0.148977	0.173473	0.148977	0.148977	0.0714299	0.049858	0.825	0.0613433	0.173473	0.319248	0.109892	0.132409	0.107888	0.0714299	0.173473	0.130357	0.0865818	0.12426	0.132409	0.148977	0.109892	0.386968	0.147106	1	0.109892	0.21027	0.0714299	0.148977	0.266882	0.132409	0.266882	0.121084	0.109892
Porphyrias	DOID:13268	0.0749632	0.0749632	0.0823791	NA	0.0749632	0.0823791	0.0823791	NA	0.0933603	0.0679241	0.109892	0.0823791	0.109892	0.0933603	NA	0.0823791	0.0933603	0.0823791	0.0823791	0.0933603	0.0698989	0.0933603	0.0823791	0.0933603	0.0933603	0.135413	0.0749632	0.0640035	0.0933603	0.0933603	0.0716984	0.491152	0.066053	0.0749632	0.0823791	0.135413	0.109892	0.176371	0.109892	1	0.109892	0.0933603	0.0823791	0.135413	0.0749632	0.135413	0.0698989	0.605211
Eczema	DOID:2723	0.0545214	0.132409	0.148977	NA	0.0545214	0.148977	0.0613433	NA	0.0714299	0.12373	0.21027	0.148977	0.0865818	0.173473	NA	0.148977	0.173473	0.148977	0.148977	0.0714299	0.049858	0.173473	0.0613433	0.173473	0.173473	0.109892	0.132409	0.107888	0.0714299	0.173473	0.130357	0.0865818	0.12426	0.132409	0.148977	0.109892	0.21027	0.147106	0.21027	0.109892	1	0.0714299	0.148977	0.811538	0.132409	0.266882	0.121084	0.109892
Ellis-Van Creveld Syndrome	DOID:12714	0.0411723	0.0411723	0.0476199	NA	0.0411723	0.0476199	0.0476199	NA	0.0571439	0.0397384	0.0714299	0.0476199	0.0714299	0.0571439	NA	0.0476199	0.0571439	0.0476199	0.0476199	0.0571439	0.0367619	0.0571439	0.0476199	0.0571439	0.0571439	0.417263	0.0411723	0.0316203	0.421999	0.0571439	0.0418146	0.0714299	0.0412673	0.0411723	0.0476199	0.0933603	0.0714299	0.12825	0.0714299	0.0933603	0.0714299	1	0.0476199	0.0933603	0.0411723	0.0933603	0.0367619	0.0933603
Retinal Vein Occlusion	DOID:1727	0.0322586	0.0783424	0.0934083	NA	0.0322586	0.171903	0.0384622	NA	0.0476199	0.0781974	0.148977	0.0934083	0.0613433	0.115648	NA	0.0934083	0.115648	0.0934083	0.0934083	0.0476199	0.0280133	0.115648	0.0384622	0.115648	0.115648	0.0823791	0.238225	0.056008	0.0476199	0.115648	0.0822137	0.0613433	0.0839745	0.0783424	0.171903	0.0823791	0.148977	0.115769	0.148977	0.0823791	0.148977	0.0476199	1	0.200064	0.0783424	0.200064	0.0680322	0.0823791
Skin Diseases	DOID:37	0.0749632	0.182054	0.200064	NA	0.0749632	0.200064	0.0823791	NA	0.0933603	0.164959	0.266882	0.200064	0.109892	0.226732	NA	0.200064	0.226732	0.200064	0.200064	0.0933603	0.0698989	0.226732	0.0823791	0.226732	0.226732	0.135413	0.182054	0.155437	0.0933603	0.226732	0.174125	0.109892	0.160414	0.182054	0.200064	0.135413	0.266882	0.176371	0.266882	0.135413	0.811538	0.0933603	0.200064	1	0.182054	0.328859	0.169754	0.135413
Blepharophimosis	DOID:10348	0.0262177	0.0636715	0.144176	NA	0.0262177	0.0783424	0.0322586	NA	0.0411723	0.312584	0.132409	0.37258	0.0545214	0.184015	NA	0.0783424	0.184015	0.144176	0.37258	0.0411723	0.0220824	0.09999	0.0322586	0.09999	0.09999	0.0749632	0.0636715	0.19933	0.0411723	0.09999	0.0690634	0.0545214	0.134114	0.302808	0.0783424	0.0749632	0.132409	0.10736	0.132409	0.0749632	0.132409	0.0411723	0.0783424	0.182054	1	0.33504	0.0986948	0.0749632
Neurotoxicity Syndromes	DOID:3602	0.0749632	0.182054	0.368184	NA	0.0749632	0.200064	0.0823791	NA	0.0933603	0.303579	0.266882	0.368184	0.109892	0.417263	NA	0.200064	0.417263	0.368184	0.368184	0.0933603	0.0698989	0.226732	0.0823791	0.226732	0.226732	0.135413	0.182054	0.286057	0.0933603	0.226732	0.174125	0.109892	0.295217	0.33504	0.200064	0.135413	0.266882	0.176371	0.266882	0.135413	0.266882	0.0933603	0.200064	0.328859	0.33504	1	0.312405	0.135413
Myoclonic Epilepsy, Juvenile	DOID:4890	0.0220824	0.0536287	0.206874	NA	0.0220824	0.0680322	0.0280133	NA	0.0367619	0.105197	0.121084	0.125202	0.049858	0.164303	NA	0.0680322	0.164303	0.323547	0.125202	0.0367619	0.0180216	0.089279	0.0280133	0.089279	0.089279	0.0698989	0.0536287	0.0593699	0.0367619	0.089279	0.0600399	0.049858	0.168627	0.0986948	0.0680322	0.0698989	0.121084	0.101627	0.121084	0.0698989	0.121084	0.0367619	0.0680322	0.169754	0.0986948	0.312405	1	0.0698989
Mitochondrial Diseases	DOID:700	0.0749632	0.0749632	0.0823791	NA	0.0749632	0.0823791	0.0823791	NA	0.0933603	0.0679241	0.109892	0.0823791	0.109892	0.0933603	NA	0.0823791	0.0933603	0.0823791	0.0823791	0.0933603	0.0698989	0.0933603	0.0823791	0.0933603	0.0933603	0.135413	0.0749632	0.0640035	0.0933603	0.0933603	0.0716984	0.491152	0.066053	0.0749632	0.0823791	0.135413	0.109892	0.176371	0.109892	0.605211	0.109892	0.0933603	0.0823791	0.135413	0.0749632	0.135413	0.0698989	1
Urologic Neoplasms	DOID:731	0.132409	0.0545214	0.0613433	NA	0.132409	0.0613433	0.148977	NA	0.527499	0.0509475	0.0865818	0.0613433	0.0865818	0.0714299	NA	0.0613433	0.0714299	0.0613433	0.0613433	0.173473	0.121084	0.0714299	0.148977	0.0714299	0.0714299	0.109892	0.0545214	0.0444246	0.0714299	0.0714299	0.0536764	0.0865818	0.051166	0.0545214	0.0613433	0.109892	0.0865818	0.147106	0.0865818	0.109892	0.0865818	0.0714299	0.0613433	0.109892	0.0545214	0.109892	0.049858	0.109892
Multiple Sclerosis, Relapsing-Remitting	DOID:2378	0.0262177	0.0636715	0.37258	NA	0.0262177	0.0783424	0.0322586	NA	0.0411723	0.12096	0.132409	0.144176	0.0545214	0.184015	NA	0.0783424	0.184015	0.238225	0.144176	0.0411723	0.0220824	0.09999	0.0322586	0.09999	0.09999	0.0749632	0.0636715	0.0771343	0.0411723	0.09999	0.0690634	0.0545214	0.273855	0.117177	0.0783424	0.0749632	0.132409	0.10736	0.132409	0.0749632	0.132409	0.0411723	0.0783424	0.182054	0.117177	0.33504	0.163075	0.0749632
Scleroderma, Localized	DOID:419	0.0318791	0.235422	0.0892681	NA	0.0318791	0.0892681	0.0367575	NA	0.0439086	0.0774163	0.132392	0.0892681	0.0545145	0.106635	NA	0.0892681	0.106635	0.0892681	0.0892681	0.0439086	0.0285246	0.106635	0.0367575	0.106635	0.106635	0.070519	0.0774206	0.0597331	0.0439086	0.196245	0.136425	0.0545145	0.0823045	0.0774206	0.0892681	0.070519	0.132392	0.0953135	0.132392	0.070519	0.132392	0.0439086	0.0892681	0.17126	0.0774206	0.17126	0.0692741	0.070519
Pancytopenia	DOID:12450	0.0411723	0.09999	0.115648	NA	0.0411723	0.115648	0.0476199	NA	0.0571439	0.0965077	0.173473	0.115648	0.0714299	0.138778	NA	0.115648	0.138778	0.115648	0.115648	0.0571439	0.0367619	0.138778	0.0476199	0.138778	0.138778	0.0933603	0.09999	0.0767921	0.0571439	0.138778	0.308794	0.0714299	0.10022	0.09999	0.115648	0.0933603	0.173473	0.12825	0.173473	0.0933603	0.173473	0.0571439	0.115648	0.226732	0.09999	0.226732	0.089279	0.0933603
Hypertension, Pulmonary	DOID:6432	0.0322586	0.0783424	0.0934083	NA	0.0322586	0.171903	0.0384622	NA	0.0476199	0.0781974	0.148977	0.0934083	0.0613433	0.115648	NA	0.0934083	0.115648	0.0934083	0.0934083	0.0476199	0.0280133	0.115648	0.0384622	0.115648	0.115648	0.0823791	0.37258	0.056008	0.0476199	0.115648	0.0822137	0.0613433	0.0839745	0.0783424	0.171903	0.0823791	0.148977	0.115769	0.148977	0.0823791	0.148977	0.0476199	0.284037	0.200064	0.0783424	0.200064	0.0680322	0.0823791
Myoclonic Epilepsies, Progressive	DOID:891	0.0220824	0.0536287	0.206874	NA	0.0220824	0.0680322	0.0280133	NA	0.0367619	0.105197	0.121084	0.125202	0.049858	0.164303	NA	0.0680322	0.164303	0.323547	0.125202	0.0367619	0.0180216	0.089279	0.0280133	0.089279	0.089279	0.0698989	0.0536287	0.0593699	0.0367619	0.089279	0.0600399	0.049858	0.168627	0.0986948	0.0680322	0.0698989	0.121084	0.101627	0.121084	0.0698989	0.121084	0.0367619	0.0680322	0.169754	0.0986948	0.312405	0.468554	0.0698989
Esophagitis	DOID:11963	0.0545214	0.132409	0.148977	NA	0.0545214	0.148977	0.0613433	NA	0.0714299	0.12373	0.386968	0.148977	0.0865818	0.173473	NA	0.148977	0.173473	0.148977	0.148977	0.0714299	0.049858	0.173473	0.0613433	0.173473	0.173473	0.109892	0.132409	0.107888	0.0714299	0.173473	0.130357	0.0865818	0.12426	0.132409	0.148977	0.109892	0.21027	0.147106	0.21027	0.109892	0.21027	0.0714299	0.148977	0.266882	0.132409	0.266882	0.121084	0.109892
Factor XI Deficiency	DOID:2229	0.0545214	0.0545214	0.0613433	NA	0.0545214	0.0613433	0.0613433	NA	0.0714299	0.0509475	0.0865818	0.0613433	0.0865818	0.0714299	NA	0.0613433	0.0714299	0.0613433	0.0613433	0.0714299	0.049858	0.0714299	0.0613433	0.0714299	0.0714299	0.491152	0.0545214	0.0444246	0.527499	0.0714299	0.0536764	0.0865818	0.051166	0.0545214	0.0613433	0.109892	0.0865818	0.147106	0.0865818	0.109892	0.0865818	0.527499	0.0613433	0.109892	0.0545214	0.109892	0.049858	0.109892
Psychoses, Substance-Induced	DOID:1742	0.0322586	0.0322586	0.0384622	NA	0.0322586	0.0384622	0.0384622	NA	0.0476199	0.0321989	0.0613433	0.0384622	0.274167	0.0476199	NA	0.0384622	0.0476199	0.0384622	0.0384622	0.0476199	0.0280133	0.0476199	0.0384622	0.0476199	0.0476199	0.0823791	0.0322586	0.0230621	0.0476199	0.0476199	0.0338527	0.0613433	0.0345777	0.0322586	0.0384622	0.0823791	0.0613433	0.115769	0.0613433	0.0823791	0.0613433	0.0476199	0.0384622	0.0823791	0.0322586	0.0823791	0.0280133	0.0823791
Stomach Ulcer	DOID:10808	0.0545214	0.132409	0.148977	NA	0.0545214	0.148977	0.0613433	NA	0.0714299	0.12373	0.386968	0.148977	0.0865818	0.173473	NA	0.148977	0.173473	0.148977	0.148977	0.0714299	0.049858	0.173473	0.0613433	0.173473	0.173473	0.109892	0.132409	0.107888	0.0714299	0.173473	0.130357	0.0865818	0.12426	0.132409	0.148977	0.109892	0.21027	0.147106	0.21027	0.109892	0.21027	0.0714299	0.148977	0.266882	0.132409	0.266882	0.121084	0.109892
Dental Enamel Hypoplasia	DOID:693	0.0322586	0.0783424	0.0934083	NA	0.0322586	0.0934083	0.0384622	NA	0.0476199	0.0781974	0.274167	0.0934083	0.0613433	0.115648	NA	0.0934083	0.115648	0.0934083	0.0934083	0.0476199	0.0280133	0.115648	0.0384622	0.115648	0.115648	0.0823791	0.0783424	0.056008	0.0476199	0.115648	0.0822137	0.0613433	0.0839745	0.0783424	0.0934083	0.0823791	0.148977	0.115769	0.148977	0.0823791	0.148977	0.0476199	0.0934083	0.200064	0.0783424	0.200064	0.0680322	0.0823791
Hepatic Encephalopathy	DOID:12550	0.0322586	0.0783424	0.284037	NA	0.0322586	0.0934083	0.0384622	NA	0.0476199	0.143909	0.148977	0.171903	0.0613433	0.212832	NA	0.0934083	0.212832	0.44423	0.171903	0.0476199	0.0280133	0.115648	0.0384622	0.115648	0.115648	0.0823791	0.0783424	0.103074	0.0476199	0.115648	0.0822137	0.0613433	0.225108	0.144176	0.0934083	0.0823791	0.148977	0.115769	0.148977	0.0823791	0.148977	0.0476199	0.0934083	0.200064	0.144176	0.368184	0.323547	0.0823791
Lung Diseases	DOID:850	0.0545214	0.132409	0.148977	NA	0.0545214	0.148977	0.0613433	NA	0.0714299	0.12373	0.21027	0.148977	0.0865818	0.173473	NA	0.708501	0.173473	0.148977	0.148977	0.0714299	0.049858	0.173473	0.0613433	0.825	0.173473	0.109892	0.132409	0.107888	0.0714299	0.173473	0.130357	0.0865818	0.12426	0.132409	0.148977	0.109892	0.21027	0.147106	0.21027	0.109892	0.21027	0.0714299	0.148977	0.266882	0.132409	0.266882	0.121084	0.109892
Legg-Perthes Disease	DOID:14415	0.0262177	0.302808	0.0783424	NA	0.0262177	0.0783424	0.0322586	NA	0.0411723	0.065727	0.132409	0.0783424	0.0545214	0.09999	NA	0.0783424	0.09999	0.0783424	0.0783424	0.0411723	0.0220824	0.09999	0.0322586	0.09999	0.09999	0.0749632	0.0636715	0.0419131	0.0411723	0.184015	0.0690634	0.0545214	0.0728749	0.0636715	0.0783424	0.0749632	0.132409	0.10736	0.132409	0.0749632	0.132409	0.0411723	0.0783424	0.182054	0.0636715	0.182054	0.0536287	0.0749632
Ciliary Motility Disorders	DOID:9562	0.0411723	0.0411723	0.0476199	NA	0.0411723	0.0476199	0.0476199	NA	0.0571439	0.0397384	0.0714299	0.0476199	0.0714299	0.0571439	NA	0.0476199	0.0571439	0.0476199	0.0476199	0.0571439	0.0367619	0.0571439	0.0476199	0.0571439	0.0571439	0.417263	0.0411723	0.0316203	0.421999	0.0571439	0.0418146	0.0714299	0.0412673	0.0411723	0.0476199	0.0933603	0.0714299	0.12825	0.0714299	0.0933603	0.0714299	0.659999	0.0476199	0.0933603	0.0411723	0.0933603	0.0367619	0.0933603
Cleidocranial Dysplasia	DOID:13994	0.0262177	0.302808	0.0783424	NA	0.0262177	0.0783424	0.0322586	NA	0.0411723	0.065727	0.132409	0.0783424	0.0545214	0.09999	NA	0.0783424	0.09999	0.0783424	0.0783424	0.0411723	0.0220824	0.09999	0.0322586	0.09999	0.09999	0.0749632	0.0636715	0.0419131	0.0411723	0.184015	0.0690634	0.0545214	0.0728749	0.0636715	0.0783424	0.0749632	0.132409	0.10736	0.132409	0.0749632	0.132409	0.0411723	0.0783424	0.182054	0.0636715	0.182054	0.0536287	0.0749632
Eunuchism	DOID:5003	0.0411723	0.09999	0.115648	NA	0.0411723	0.115648	0.0476199	NA	0.0571439	0.0965077	0.173473	0.115648	0.0714299	0.138778	NA	0.115648	0.138778	0.115648	0.115648	0.0571439	0.0367619	0.255398	0.0476199	0.138778	0.421999	0.0933603	0.09999	0.0767921	0.0571439	0.138778	0.10155	0.0714299	0.10022	0.09999	0.115648	0.0933603	0.319248	0.12825	0.319248	0.0933603	0.173473	0.0571439	0.115648	0.226732	0.09999	0.226732	0.089279	0.0933603
Pneumonia	DOID:552	0.0411723	0.09999	0.115648	NA	0.0411723	0.115648	0.0476199	NA	0.0571439	0.0965077	0.173473	0.115648	0.0714299	0.138778	NA	0.549999	0.138778	0.115648	0.115648	0.0571439	0.0367619	0.138778	0.0476199	0.659999	0.138778	0.0933603	0.09999	0.0767921	0.0571439	0.138778	0.10155	0.0714299	0.10022	0.09999	0.115648	0.0933603	0.173473	0.12825	0.173473	0.0933603	0.173473	0.0571439	0.115648	0.226732	0.09999	0.226732	0.089279	0.0933603
Lipid Metabolism, Inborn Errors	DOID:3146	0.0749632	0.0749632	0.0823791	NA	0.0749632	0.0823791	0.0823791	NA	0.0933603	0.0679241	0.109892	0.0823791	0.109892	0.0933603	NA	0.0823791	0.0933603	0.0823791	0.0823791	0.0933603	0.0698989	0.0933603	0.0823791	0.0933603	0.0933603	0.135413	0.0749632	0.0640035	0.0933603	0.0933603	0.0716984	0.811538	0.066053	0.0749632	0.0823791	0.135413	0.109892	0.176371	0.109892	0.605211	0.109892	0.0933603	0.0823791	0.135413	0.0749632	0.135413	0.0698989	0.605211
Pain	DOID:0060164	0.0749632	0.0749632	0.0823791	NA	0.0749632	0.0823791	0.0823791	NA	0.0933603	0.0679241	0.109892	0.0823791	0.266882	0.0933603	NA	0.0823791	0.0933603	0.0823791	0.0823791	0.0933603	0.0698989	0.0933603	0.0823791	0.0933603	0.0933603	0.135413	0.0749632	0.0640035	0.0933603	0.0933603	0.0716984	0.109892	0.066053	0.0749632	0.0823791	0.135413	0.109892	0.176371	0.109892	0.135413	0.109892	0.0933603	0.0823791	0.135413	0.0749632	0.135413	0.0698989	0.135413
Vipoma	DOID:5574	0.238225	0.0322586	0.0384622	NA	0.238225	0.0384622	0.284037	NA	0.115648	0.0321989	0.0613433	0.0384622	0.0613433	0.0476199	NA	0.0384622	0.0476199	0.0384622	0.0384622	0.351665	0.206874	0.0476199	0.673076	0.0476199	0.0476199	0.0823791	0.0322586	0.0230621	0.0476199	0.0476199	0.0338527	0.0613433	0.0345777	0.0322586	0.0384622	0.0823791	0.0613433	0.115769	0.0613433	0.0823791	0.0613433	0.0476199	0.0384622	0.0823791	0.0322586	0.0823791	0.0280133	0.0823791
Cogan Syndrome	DOID:0060216	0.0322586	0.0783424	0.171903	NA	0.0322586	0.0934083	0.0384622	NA	0.0476199	0.534733	0.148977	0.673076	0.0613433	0.212832	NA	0.0934083	0.212832	0.171903	0.673076	0.0476199	0.0280133	0.115648	0.0384622	0.115648	0.115648	0.0823791	0.0783424	0.40358	0.0476199	0.115648	0.0822137	0.0613433	0.154541	0.564516	0.0934083	0.0823791	0.148977	0.115769	0.148977	0.0823791	0.148977	0.0476199	0.0934083	0.200064	0.37258	0.368184	0.125202	0.0823791
Liver Cirrhosis, Alcoholic	DOID:14018	0.0322586	0.0783424	0.0934083	NA	0.0322586	0.0934083	0.0384622	NA	0.0476199	0.0781974	0.274167	0.0934083	0.0613433	0.115648	NA	0.0934083	0.115648	0.0934083	0.0934083	0.0476199	0.0280133	0.115648	0.0384622	0.115648	0.115648	0.0823791	0.0783424	0.056008	0.0476199	0.115648	0.0822137	0.0613433	0.0839745	0.0783424	0.0934083	0.0823791	0.148977	0.115769	0.148977	0.0823791	0.148977	0.0476199	0.0934083	0.200064	0.0783424	0.200064	0.0680322	0.0823791
Glioblastoma	DOID:3068	0.144176	0.0322586	0.0384622	NA	0.144176	0.0384622	0.171903	NA	0.115648	0.0321989	0.0613433	0.0384622	0.0613433	0.0476199	NA	0.0384622	0.0476199	0.0384622	0.0384622	0.212832	0.125202	0.0476199	0.171903	0.0476199	0.0476199	0.0823791	0.0322586	0.0230621	0.0476199	0.0476199	0.0338527	0.0613433	0.0345777	0.0322586	0.0384622	0.0823791	0.0613433	0.115769	0.0613433	0.0823791	0.0613433	0.0476199	0.0384622	0.0823791	0.0322586	0.0823791	0.0280133	0.0823791
Basal Ganglia Diseases	DOID:679	0.0411723	0.09999	0.351665	NA	0.0411723	0.115648	0.0476199	NA	0.0571439	0.177607	0.173473	0.212832	0.0714299	0.255398	NA	0.115648	0.255398	0.549999	0.212832	0.0571439	0.0367619	0.138778	0.0476199	0.138778	0.138778	0.0933603	0.09999	0.141323	0.0571439	0.138778	0.10155	0.0714299	0.274072	0.184015	0.115648	0.0933603	0.173473	0.12825	0.173473	0.0933603	0.173473	0.0571439	0.115648	0.226732	0.184015	0.417263	0.424592	0.0933603
Laryngeal Diseases	DOID:786	0.0545214	0.132409	0.148977	NA	0.0545214	0.148977	0.0613433	NA	0.0714299	0.12373	0.21027	0.148977	0.0865818	0.173473	NA	0.274167	0.173473	0.148977	0.148977	0.0714299	0.049858	0.173473	0.0613433	0.319248	0.173473	0.109892	0.132409	0.107888	0.0714299	0.173473	0.130357	0.0865818	0.12426	0.132409	0.148977	0.109892	0.21027	0.147106	0.21027	0.109892	0.21027	0.0714299	0.148977	0.266882	0.132409	0.266882	0.121084	0.109892
Hodgkin Disease	DOID:8543	0.163075	0.0220824	0.0280133	NA	0.163075	0.0280133	0.206874	NA	0.089279	0.0235373	0.049858	0.0280133	0.049858	0.0367619	NA	0.0280133	0.0367619	0.0280133	0.0280133	0.271481	0.315373	0.0367619	0.206874	0.0367619	0.0367619	0.0698989	0.0220824	0.0132837	0.0367619	0.0367619	0.0247223	0.049858	0.0268613	0.0220824	0.0280133	0.0698989	0.049858	0.101627	0.049858	0.0698989	0.049858	0.0367619	0.0280133	0.0698989	0.0220824	0.0698989	0.0180216	0.0698989
Acromegaly	DOID:2449	0.0411723	0.09999	0.115648	NA	0.0411723	0.115648	0.0476199	NA	0.0571439	0.0965077	0.173473	0.115648	0.0714299	0.138778	NA	0.115648	0.138778	0.115648	0.115648	0.0571439	0.0367619	0.255398	0.0476199	0.138778	0.255398	0.0933603	0.09999	0.0767921	0.0571439	0.138778	0.10155	0.0714299	0.10022	0.09999	0.115648	0.0933603	0.319248	0.12825	0.319248	0.0933603	0.173473	0.0571439	0.115648	0.226732	0.09999	0.226732	0.089279	0.0933603
Hyperlipidemias	DOID:1168	0.0545214	0.0545214	0.0613433	NA	0.0545214	0.0613433	0.0613433	NA	0.0714299	0.0509475	0.0865818	0.0613433	0.0865818	0.0714299	NA	0.0613433	0.0714299	0.0613433	0.0613433	0.0714299	0.049858	0.0714299	0.0613433	0.0714299	0.0714299	0.109892	0.0545214	0.0444246	0.0714299	0.0714299	0.0536764	0.639393	0.051166	0.0545214	0.0613433	0.109892	0.0865818	0.147106	0.0865818	0.491152	0.0865818	0.0714299	0.0613433	0.109892	0.0545214	0.109892	0.049858	0.491152
Candidiasis, Vulvovaginal	DOID:2272	0.0322586	0.0322586	0.0384622	NA	0.0322586	0.0384622	0.0384622	NA	0.0476199	0.0321989	0.0613433	0.0384622	0.0613433	0.0476199	NA	0.0384622	0.0476199	0.0384622	0.0384622	0.0476199	0.0280133	0.0476199	0.0384622	0.0476199	0.0476199	0.0823791	0.0322586	0.0230621	0.0476199	0.0476199	0.0338527	0.0613433	0.0345777	0.0322586	0.0384622	0.200064	0.0613433	0.115769	0.0613433	0.0823791	0.0613433	0.0476199	0.0384622	0.0823791	0.0322586	0.0823791	0.0280133	0.0823791
Kallmann Syndrome	DOID:3614	0.0411723	0.09999	0.115648	NA	0.0411723	0.115648	0.0476199	NA	0.0571439	0.0965077	0.173473	0.115648	0.0714299	0.138778	NA	0.115648	0.138778	0.115648	0.115648	0.0571439	0.0367619	0.255398	0.0476199	0.138778	0.421999	0.0933603	0.09999	0.0767921	0.0571439	0.138778	0.10155	0.0714299	0.10022	0.09999	0.115648	0.0933603	0.319248	0.12825	0.319248	0.0933603	0.173473	0.0571439	0.115648	0.226732	0.09999	0.226732	0.089279	0.0933603
Mucocutaneous Lymph Node Syndrome	DOID:13378	0.0322586	0.0783424	0.0934083	NA	0.0322586	0.0934083	0.0384622	NA	0.0476199	0.0781974	0.148977	0.0934083	0.0613433	0.115648	NA	0.0934083	0.115648	0.0934083	0.0934083	0.0476199	0.0280133	0.115648	0.0384622	0.115648	0.115648	0.0823791	0.0783424	0.056008	0.0476199	0.115648	0.151301	0.0613433	0.0839745	0.0783424	0.0934083	0.0823791	0.148977	0.115769	0.148977	0.0823791	0.148977	0.0476199	0.0934083	0.200064	0.0783424	0.200064	0.0680322	0.0823791
Leukemia, Lymphoid	DOID:1037	0.193613	0.0262177	0.0322586	NA	0.193613	0.0322586	0.238225	NA	0.09999	0.0270641	0.0545214	0.0322586	0.0545214	0.0411723	NA	0.0322586	0.0411723	0.0322586	0.0322586	0.304051	0.574132	0.0411723	0.238225	0.0411723	0.0411723	0.0749632	0.0262177	0.0172584	0.0411723	0.0411723	0.0284379	0.0545214	0.0300073	0.0262177	0.0322586	0.0749632	0.0545214	0.10736	0.0545214	0.0749632	0.0545214	0.0411723	0.0322586	0.0749632	0.0262177	0.0749632	0.0220824	0.0749632
Rhabdoid Tumor	DOID:3672	0.193613	0.0262177	0.0322586	NA	0.193613	0.0322586	0.238225	NA	0.09999	0.0270641	0.0545214	0.0322586	0.0545214	0.0411723	NA	0.0322586	0.0411723	0.0322586	0.0322586	0.304051	0.163075	0.0411723	0.238225	0.0411723	0.0411723	0.0749632	0.0262177	0.0172584	0.0411723	0.0411723	0.0284379	0.0545214	0.0300073	0.0262177	0.0322586	0.0749632	0.0545214	0.10736	0.0545214	0.0749632	0.0545214	0.0411723	0.0322586	0.0749632	0.0262177	0.0749632	0.0220824	0.0749632
Wilms Tumor	DOID:2154	0.238225	0.0322586	0.0384622	NA	0.238225	0.0384622	0.284037	NA	0.115648	0.0321989	0.0613433	0.0384622	0.0613433	0.0476199	NA	0.0384622	0.0476199	0.0384622	0.0384622	0.351665	0.206874	0.0476199	0.284037	0.0476199	0.0476199	0.0823791	0.0322586	0.0230621	0.0476199	0.0476199	0.0338527	0.0613433	0.0345777	0.0322586	0.0384622	0.0823791	0.0613433	0.115769	0.0613433	0.0823791	0.0613433	0.0476199	0.0384622	0.0823791	0.0322586	0.0823791	0.0280133	0.0823791
Pseudoxanthoma Elasticum	DOID:2738	0.0411723	0.0411723	0.0476199	NA	0.0411723	0.0476199	0.0476199	NA	0.0571439	0.0397384	0.0714299	0.0476199	0.0714299	0.0571439	NA	0.0476199	0.0571439	0.0476199	0.0476199	0.0571439	0.0367619	0.0571439	0.0476199	0.0571439	0.0571439	0.417263	0.0411723	0.0316203	0.421999	0.0571439	0.0418146	0.0714299	0.0412673	0.0411723	0.0476199	0.0933603	0.0714299	0.12825	0.0714299	0.0933603	0.0714299	0.659999	0.0476199	0.0933603	0.0411723	0.0933603	0.0367619	0.0933603
Peptic Ulcer	DOID:750	0.0749632	0.182054	0.200064	NA	0.0749632	0.200064	0.0823791	NA	0.0933603	0.164959	0.491152	0.200064	0.109892	0.226732	NA	0.200064	0.226732	0.200064	0.200064	0.0933603	0.0698989	0.226732	0.0823791	0.226732	0.226732	0.135413	0.182054	0.155437	0.0933603	0.226732	0.174125	0.109892	0.160414	0.182054	0.200064	0.135413	0.266882	0.176371	0.266882	0.135413	0.266882	0.0933603	0.200064	0.328859	0.182054	0.328859	0.169754	0.135413
Arthritis, Psoriatic	DOID:9008	0.10736	0.10736	0.115769	NA	0.10736	0.115769	0.115769	NA	0.12825	0.0943727	0.147106	0.115769	0.147106	0.12825	NA	0.115769	0.12825	0.115769	0.115769	0.12825	0.101627	0.12825	0.115769	0.12825	0.12825	0.176371	0.10736	0.094962	0.12825	0.12825	0.0999124	0.147106	0.0889973	0.10736	0.115769	0.176371	0.147106	0.543379	0.147106	0.176371	0.147106	0.12825	0.115769	0.176371	0.10736	0.176371	0.101627	0.176371
Galactosemias	DOID:9870	0.0545214	0.0545214	0.0613433	NA	0.0545214	0.0613433	0.0613433	NA	0.0714299	0.0509475	0.0865818	0.0613433	0.0865818	0.0714299	NA	0.0613433	0.0714299	0.0613433	0.0613433	0.0714299	0.049858	0.0714299	0.0613433	0.0714299	0.0714299	0.109892	0.0545214	0.0444246	0.0714299	0.0714299	0.0536764	0.386968	0.051166	0.0545214	0.0613433	0.109892	0.0865818	0.147106	0.0865818	0.491152	0.0865818	0.0714299	0.0613433	0.109892	0.0545214	0.109892	0.049858	0.491152
West Nile Fever	DOID:2365	0.0749632	0.0749632	0.0823791	NA	0.0749632	0.0823791	0.0823791	NA	0.0933603	0.0679241	0.109892	0.0823791	0.109892	0.0933603	NA	0.0823791	0.0933603	0.0823791	0.0823791	0.0933603	0.0698989	0.0933603	0.0823791	0.0933603	0.0933603	0.135413	0.0749632	0.0640035	0.0933603	0.0933603	0.0716984	0.109892	0.066053	0.0749632	0.0823791	0.605211	0.109892	0.176371	0.109892	0.135413	0.109892	0.0933603	0.0823791	0.135413	0.0749632	0.135413	0.0698989	0.135413
Central Nervous System Diseases	DOID:331	0.0749632	0.182054	0.608356	NA	0.0749632	0.200064	0.0823791	NA	0.0933603	0.303579	0.266882	0.368184	0.109892	0.417263	NA	0.200064	0.417263	0.608356	0.368184	0.0933603	0.0698989	0.226732	0.0823791	0.226732	0.226732	0.135413	0.182054	0.286057	0.0933603	0.226732	0.174125	0.109892	0.455493	0.33504	0.200064	0.135413	0.266882	0.176371	0.266882	0.135413	0.266882	0.0933603	0.200064	0.328859	0.33504	0.605211	0.516192	0.135413
Sinus Thrombosis, Intracranial	DOID:3572	0.0262177	0.0636715	0.0783424	NA	0.0262177	0.144176	0.0322586	NA	0.0411723	0.065727	0.132409	0.0783424	0.0545214	0.09999	NA	0.0783424	0.09999	0.0783424	0.0783424	0.0411723	0.0220824	0.09999	0.0322586	0.09999	0.09999	0.0749632	0.302808	0.0419131	0.0411723	0.09999	0.0690634	0.0545214	0.0728749	0.0636715	0.144176	0.0749632	0.132409	0.10736	0.132409	0.0749632	0.132409	0.0411723	0.238225	0.182054	0.0636715	0.182054	0.0536287	0.0749632
Immunologic Deficiency Syndromes	DOID:612	0.0749632	0.182054	0.200064	NA	0.0749632	0.200064	0.0823791	NA	0.0933603	0.164959	0.266882	0.200064	0.109892	0.226732	NA	0.200064	0.226732	0.200064	0.200064	0.0933603	0.0698989	0.226732	0.0823791	0.226732	0.226732	0.135413	0.182054	0.155437	0.0933603	0.226732	0.529481	0.109892	0.160414	0.182054	0.200064	0.135413	0.266882	0.176371	0.266882	0.135413	0.266882	0.0933603	0.200064	0.328859	0.182054	0.328859	0.169754	0.135413
Neuroendocrine Tumors	DOID:169	0.304051	0.0411723	0.0476199	NA	0.304051	0.0476199	0.351665	NA	0.138778	0.0397384	0.0714299	0.0476199	0.0714299	0.0571439	NA	0.0476199	0.0571439	0.0476199	0.0476199	0.421999	0.271481	0.0571439	0.833333	0.0571439	0.0571439	0.0933603	0.0411723	0.0316203	0.0571439	0.0571439	0.0418146	0.0714299	0.0412673	0.0411723	0.0476199	0.0933603	0.0714299	0.12825	0.0714299	0.0933603	0.0714299	0.0571439	0.0476199	0.0933603	0.0411723	0.0933603	0.0367619	0.0933603
Spinal Dysraphism	DOID:1089	0.0411723	0.09999	0.351665	NA	0.0411723	0.115648	0.0476199	NA	0.0571439	0.177607	0.173473	0.212832	0.0714299	0.255398	NA	0.115648	0.255398	0.351665	0.212832	0.0571439	0.0367619	0.138778	0.0476199	0.138778	0.138778	0.0933603	0.09999	0.141323	0.0571439	0.138778	0.10155	0.0714299	0.274072	0.184015	0.115648	0.0933603	0.173473	0.12825	0.173473	0.0933603	0.173473	0.0571439	0.115648	0.226732	0.184015	0.417263	0.271481	0.0933603
Deafness	DOID:0050563	0.0411723	0.09999	0.212832	NA	0.0411723	0.115648	0.0476199	NA	0.0571439	0.293462	0.173473	0.351665	0.0714299	0.255398	NA	0.115648	0.255398	0.212832	0.351665	0.0571439	0.0367619	0.138778	0.0476199	0.138778	0.138778	0.0933603	0.09999	0.233511	0.0571439	0.138778	0.10155	0.0714299	0.184439	0.304051	0.115648	0.0933603	0.173473	0.12825	0.173473	0.0933603	0.173473	0.0571439	0.115648	0.226732	0.304051	0.417263	0.164303	0.0933603
Macrocephaly	DOID:2186	NA	NA	NA	NA	NA	NA	NA	NA	NA	NA	NA	NA	NA	NA	NA	NA	NA	NA	NA	NA	NA	NA	NA	NA	NA	NA	NA	NA	NA	NA	NA	NA	NA	NA	NA	NA	NA	NA	NA	NA	NA	NA	NA	NA	NA	NA	NA	NA
Sick Sinus Syndrome	DOID:13884	0.0411723	0.09999	0.115648	NA	0.0411723	0.212832	0.0476199	NA	0.0571439	0.0965077	0.173473	0.115648	0.0714299	0.138778	NA	0.115648	0.138778	0.115648	0.115648	0.0571439	0.0367619	0.138778	0.0476199	0.138778	0.138778	0.0933603	0.184015	0.0767921	0.0571439	0.138778	0.10155	0.0714299	0.10022	0.09999	0.212832	0.0933603	0.173473	0.12825	0.173473	0.0933603	0.173473	0.0571439	0.212832	0.226732	0.09999	0.226732	0.089279	0.0933603
Uterine Cervical Neoplasms	DOID:2893	0.193613	0.0262177	0.0322586	NA	0.193613	0.0322586	0.238225	NA	0.09999	0.0270641	0.0545214	0.0322586	0.0545214	0.0411723	NA	0.0322586	0.0411723	0.0322586	0.0322586	0.304051	0.163075	0.0411723	0.238225	0.0411723	0.0411723	0.0749632	0.0262177	0.0172584	0.0411723	0.0411723	0.0284379	0.0545214	0.0300073	0.0262177	0.0322586	0.0749632	0.0545214	0.10736	0.0545214	0.0749632	0.0545214	0.0411723	0.0322586	0.0749632	0.0262177	0.0749632	0.0220824	0.0749632
Lymphoma, B-Cell	DOID:707	0.163075	0.0220824	0.0280133	NA	0.163075	0.0280133	0.206874	NA	0.089279	0.0235373	0.049858	0.0280133	0.049858	0.0367619	NA	0.0280133	0.0367619	0.0280133	0.0280133	0.271481	0.315373	0.0367619	0.206874	0.0367619	0.0367619	0.0698989	0.0220824	0.0132837	0.0367619	0.0367619	0.0247223	0.049858	0.0268613	0.0220824	0.0280133	0.0698989	0.049858	0.101627	0.049858	0.0698989	0.049858	0.0367619	0.0280133	0.0698989	0.0220824	0.0698989	0.0180216	0.0698989
Bartter Syndrome	DOID:445	0.0411723	0.09999	0.115648	NA	0.0411723	0.115648	0.0476199	NA	0.0571439	0.0965077	0.173473	0.115648	0.0714299	0.138778	NA	0.115648	0.138778	0.115648	0.115648	0.0571439	0.0367619	0.138778	0.0476199	0.138778	0.138778	0.0933603	0.09999	0.0767921	0.0571439	0.138778	0.10155	0.0714299	0.10022	0.09999	0.115648	0.0933603	0.173473	0.12825	0.173473	0.0933603	0.173473	0.0571439	0.115648	0.226732	0.09999	0.226732	0.089279	0.0933603
Budd-Chiari Syndrome	DOID:11512	0.0411723	0.09999	0.115648	NA	0.0411723	0.212832	0.0476199	NA	0.0571439	0.0965077	0.173473	0.115648	0.0714299	0.138778	NA	0.115648	0.138778	0.115648	0.115648	0.0571439	0.0367619	0.138778	0.0476199	0.138778	0.138778	0.0933603	0.304051	0.0767921	0.0571439	0.138778	0.10155	0.0714299	0.10022	0.09999	0.212832	0.0933603	0.173473	0.12825	0.173473	0.0933603	0.173473	0.0571439	0.351665	0.226732	0.09999	0.226732	0.089279	0.0933603
Eosinophilia	DOID:999	0.0411723	0.09999	0.115648	NA	0.0411723	0.115648	0.0476199	NA	0.0571439	0.0965077	0.173473	0.115648	0.0714299	0.138778	NA	0.115648	0.138778	0.115648	0.115648	0.0571439	0.0367619	0.138778	0.0476199	0.138778	0.138778	0.0933603	0.09999	0.0767921	0.0571439	0.138778	0.308794	0.0714299	0.10022	0.09999	0.115648	0.0933603	0.173473	0.12825	0.173473	0.0933603	0.173473	0.0571439	0.115648	0.226732	0.09999	0.226732	0.089279	0.0933603
Dengue Hemorrhagic Fever	DOID:12206	0.0545214	0.0545214	0.0613433	NA	0.0545214	0.0613433	0.0613433	NA	0.0714299	0.0509475	0.0865818	0.0613433	0.0865818	0.0714299	NA	0.0613433	0.0714299	0.0613433	0.0613433	0.0714299	0.049858	0.0714299	0.0613433	0.0714299	0.0714299	0.109892	0.0545214	0.0444246	0.0714299	0.0714299	0.0536764	0.0865818	0.051166	0.0545214	0.0613433	0.491152	0.0865818	0.147106	0.0865818	0.109892	0.0865818	0.0714299	0.0613433	0.109892	0.0545214	0.109892	0.049858	0.109892
Aortic Stenosis, Supravalvular	DOID:1929	0.0262177	0.0636715	0.0783424	NA	0.0262177	0.37258	0.0322586	NA	0.0411723	0.065727	0.132409	0.0783424	0.0545214	0.09999	NA	0.0783424	0.09999	0.0783424	0.0783424	0.0411723	0.0220824	0.09999	0.0322586	0.09999	0.09999	0.0749632	0.117177	0.0419131	0.0411723	0.09999	0.0690634	0.0545214	0.0728749	0.0636715	0.838709	0.0749632	0.132409	0.10736	0.132409	0.0749632	0.132409	0.0411723	0.144176	0.182054	0.0636715	0.182054	0.0536287	0.0749632
Agammaglobulinemia	DOID:2583	0.0344352	0.0836282	0.0965077	NA	0.0344352	0.0965077	0.0397384	NA	0.0475288	0.0828031	0.143573	0.0965077	0.0591185	0.115427	NA	0.0965077	0.115427	0.0965077	0.0965077	0.0475288	0.0307938	0.115427	0.0397384	0.115427	0.115427	0.0766892	0.0836282	0.0644408	0.0475288	0.115427	0.875358	0.0591185	0.0874453	0.0836282	0.0965077	0.0766892	0.143573	0.104106	0.143573	0.0766892	0.143573	0.0475288	0.0965077	0.186245	0.0836282	0.186245	0.0747849	0.0766892
Rhinitis	DOID:4483	0.0322586	0.0783424	0.0934083	NA	0.0322586	0.0934083	0.0384622	NA	0.0476199	0.0781974	0.148977	0.0934083	0.0613433	0.115648	NA	0.171903	0.115648	0.0934083	0.0934083	0.0476199	0.0280133	0.115648	0.0384622	0.212832	0.115648	0.0823791	0.0783424	0.056008	0.0476199	0.115648	0.0822137	0.0613433	0.0839745	0.0783424	0.0934083	0.0823791	0.148977	0.115769	0.148977	0.0823791	0.148977	0.0476199	0.0934083	0.200064	0.0783424	0.200064	0.0680322	0.0823791
Infarction, Middle Cerebral Artery	DOID:3525	0.0185926	0.0451535	0.0571619	NA	0.0185926	0.105197	0.0235373	NA	0.0307938	0.0492868	0.100965	0.0571619	0.0415738	0.0747849	NA	0.0571619	0.0747849	0.0571619	0.0571619	0.0307938	0.0151952	0.0747849	0.0235373	0.0747849	0.0747849	0.0578819	0.21474	0.0272462	0.0307938	0.0747849	0.0514116	0.0415738	0.0571424	0.0451535	0.105197	0.0578819	0.100965	0.0832441	0.100965	0.0578819	0.100965	0.0307938	0.173819	0.14057	0.0451535	0.14057	0.0369027	0.0578819
Spastic Paraplegia, Hereditary	DOID:2476	0.0411723	0.09999	0.351665	NA	0.0411723	0.115648	0.0476199	NA	0.0571439	0.177607	0.173473	0.212832	0.0714299	0.255398	NA	0.115648	0.255398	0.351665	0.212832	0.0571439	0.0367619	0.138778	0.0476199	0.138778	0.138778	0.0933603	0.09999	0.141323	0.0571439	0.138778	0.10155	0.0714299	0.274072	0.184015	0.115648	0.0933603	0.173473	0.12825	0.173473	0.0933603	0.173473	0.0571439	0.115648	0.226732	0.184015	0.417263	0.271481	0.0933603
Leukemia, Promyelocytic, Acute	DOID:0060318	0.142026	0.0192322	0.0250878	NA	0.142026	0.0250878	0.185269	NA	0.0819002	0.0211008	0.0466468	0.0250878	0.0466468	0.0337236	NA	0.0250878	0.0337236	0.0250878	0.0250878	0.249044	0.844672	0.0337236	0.185269	0.0337236	0.0337236	0.0664141	0.0192322	0.0105433	0.0337236	0.0337236	0.0221572	0.0466468	0.0246847	0.0192322	0.0250878	0.0664141	0.0466468	0.0976859	0.0466468	0.0664141	0.0466468	0.0337236	0.0250878	0.0664141	0.0192322	0.0664141	0.0152224	0.0664141
Spondylitis, Ankylosing	DOID:7147	0.0322586	0.564516	0.0934083	NA	0.0322586	0.0934083	0.0384622	NA	0.0476199	0.0781974	0.148977	0.0934083	0.0613433	0.115648	NA	0.0934083	0.115648	0.0934083	0.0934083	0.0476199	0.0280133	0.115648	0.0384622	0.115648	0.115648	0.0823791	0.0783424	0.056008	0.0476199	0.212832	0.0822137	0.0613433	0.0839745	0.0783424	0.0934083	0.0823791	0.148977	0.115769	0.148977	0.0823791	0.148977	0.0476199	0.0934083	0.200064	0.0783424	0.200064	0.0680322	0.0823791
Ileitis	DOID:0060189	0.0322586	0.0783424	0.0934083	NA	0.0322586	0.0934083	0.0384622	NA	0.0476199	0.0781974	0.45301	0.0934083	0.0613433	0.115648	NA	0.0934083	0.115648	0.0934083	0.0934083	0.0476199	0.0280133	0.115648	0.0384622	0.115648	0.115648	0.0823791	0.0783424	0.056008	0.0476199	0.115648	0.0822137	0.0613433	0.0839745	0.0783424	0.0934083	0.0823791	0.148977	0.115769	0.148977	0.0823791	0.148977	0.0476199	0.0934083	0.200064	0.0783424	0.200064	0.0680322	0.0823791
Tobacco Use Disorder	DOID:0050742	0.0545214	0.0545214	0.0613433	NA	0.0545214	0.0613433	0.0613433	NA	0.0714299	0.0509475	0.0865818	0.0613433	0.21027	0.0714299	NA	0.0613433	0.0714299	0.0613433	0.0613433	0.0714299	0.049858	0.0714299	0.0613433	0.0714299	0.0714299	0.109892	0.0545214	0.0444246	0.0714299	0.0714299	0.0536764	0.0865818	0.051166	0.0545214	0.0613433	0.109892	0.0865818	0.147106	0.0865818	0.109892	0.0865818	0.0714299	0.0613433	0.109892	0.0545214	0.109892	0.049858	0.109892
Asthma	DOID:2841	0.0344352	0.0836282	0.0965077	NA	0.0344352	0.0965077	0.0397384	NA	0.0475288	0.0828031	0.143573	0.0965077	0.0591185	0.115427	NA	0.429763	0.115427	0.0965077	0.0965077	0.0475288	0.0307938	0.115427	0.0397384	0.759627	0.115427	0.0766892	0.0836282	0.0644408	0.0475288	0.115427	0.0864876	0.0591185	0.0874453	0.0836282	0.0965077	0.0766892	0.143573	0.104106	0.143573	0.0766892	0.143573	0.0475288	0.0965077	0.186245	0.0836282	0.186245	0.0747849	0.0766892
Diffuse Cerebral Sclerosis of Schilder	DOID:0060215	0.0322586	0.0783424	0.44423	NA	0.0322586	0.0934083	0.0384622	NA	0.0476199	0.143909	0.148977	0.171903	0.0613433	0.212832	NA	0.0934083	0.212832	0.284037	0.171903	0.0476199	0.0280133	0.115648	0.0384622	0.115648	0.115648	0.0823791	0.0783424	0.103074	0.0476199	0.115648	0.0822137	0.0613433	0.325918	0.144176	0.0934083	0.0823791	0.148977	0.115769	0.148977	0.0823791	0.148977	0.0476199	0.0934083	0.200064	0.144176	0.368184	0.206874	0.0823791
Breast Neoplasms, Male	DOID:1614	0.238225	0.0322586	0.0384622	NA	0.238225	0.0384622	0.284037	NA	0.115648	0.0321989	0.0613433	0.0384622	0.0613433	0.0476199	NA	0.0384622	0.0476199	0.0384622	0.0384622	0.351665	0.206874	0.0476199	0.284037	0.0476199	0.0476199	0.0823791	0.0322586	0.0230621	0.0476199	0.0476199	0.0338527	0.0613433	0.0345777	0.0322586	0.0384622	0.0823791	0.0613433	0.115769	0.0613433	0.0823791	0.0613433	0.0476199	0.0384622	0.0823791	0.0322586	0.0823791	0.0280133	0.0823791
Carotid Artery Thrombosis	DOID:3410	0.0235893	0.0572883	0.0703946	NA	0.0235893	0.12955	0.028986	NA	0.036923	0.0600399	0.118396	0.0703946	0.0487513	0.0896701	NA	0.0703946	0.0896701	0.0703946	0.0703946	0.036923	0.0198867	0.0896701	0.028986	0.0896701	0.0896701	0.0667309	0.272451	0.0377859	0.036923	0.0896701	0.0628117	0.0487513	0.0672353	0.0572883	0.12955	0.0667309	0.118396	0.0948993	0.118396	0.0667309	0.118396	0.036923	0.214057	0.162061	0.0572883	0.162061	0.0482963	0.0667309
Purpura, Thrombotic Thrombocytopenic	DOID:10772	0.0322586	0.0783424	0.0934083	NA	0.0322586	0.0934083	0.0384622	NA	0.0476199	0.0781974	0.148977	0.0934083	0.0613433	0.115648	NA	0.0934083	0.115648	0.0934083	0.0934083	0.0476199	0.0280133	0.115648	0.0384622	0.115648	0.115648	0.0823791	0.0783424	0.056008	0.0476199	0.115648	0.249997	0.0613433	0.0839745	0.0783424	0.0934083	0.0823791	0.148977	0.115769	0.148977	0.0823791	0.148977	0.0476199	0.0934083	0.200064	0.0783424	0.200064	0.0680322	0.0823791
Leprosy	DOID:1024	0.0545214	0.0545214	0.0613433	NA	0.0545214	0.0613433	0.0613433	NA	0.0714299	0.0509475	0.0865818	0.0613433	0.0865818	0.0714299	NA	0.0613433	0.0714299	0.0613433	0.0613433	0.0714299	0.049858	0.0714299	0.0613433	0.0714299	0.0714299	0.109892	0.0545214	0.0444246	0.0714299	0.0714299	0.0536764	0.0865818	0.051166	0.0545214	0.0613433	0.266882	0.0865818	0.147106	0.0865818	0.109892	0.0865818	0.0714299	0.0613433	0.109892	0.0545214	0.109892	0.049858	0.109892
Multiple Sclerosis	DOID:2377	0.0322586	0.0783424	0.44423	NA	0.0322586	0.0934083	0.0384622	NA	0.0476199	0.143909	0.148977	0.171903	0.0613433	0.212832	NA	0.0934083	0.212832	0.284037	0.171903	0.0476199	0.0280133	0.115648	0.0384622	0.115648	0.115648	0.0823791	0.0783424	0.103074	0.0476199	0.115648	0.0822137	0.0613433	0.325918	0.144176	0.0934083	0.0823791	0.148977	0.115769	0.148977	0.0823791	0.148977	0.0476199	0.0934083	0.200064	0.144176	0.368184	0.206874	0.0823791
Wolfram Syndrome	DOID:10632	0.10736	0.10736	0.115769	NA	0.10736	0.115769	0.115769	NA	0.12825	0.0943727	0.147106	0.115769	0.147106	0.12825	NA	0.115769	0.12825	0.115769	0.115769	0.12825	0.101627	0.12825	0.115769	0.12825	0.12825	0.428329	0.10736	0.094962	0.311463	0.12825	0.0999124	0.147106	0.0889973	0.10736	0.115769	0.176371	0.147106	0.223744	0.147106	0.176371	0.147106	0.311463	0.115769	0.176371	0.10736	0.176371	0.101627	0.176371
Myoglobinuria	DOID:0080108	NA	NA	NA	NA	NA	NA	NA	NA	NA	NA	NA	NA	NA	NA	NA	NA	NA	NA	NA	NA	NA	NA	NA	NA	NA	NA	NA	NA	NA	NA	NA	NA	NA	NA	NA	NA	NA	NA	NA	NA	NA	NA	NA	NA	NA	NA	NA	NA
Anemia, Sickle Cell	DOID:10923	0.0411723	0.0411723	0.0476199	NA	0.0411723	0.0476199	0.0476199	NA	0.0571439	0.0397384	0.0714299	0.0476199	0.0714299	0.0571439	NA	0.0476199	0.0571439	0.0476199	0.0476199	0.0571439	0.0367619	0.0571439	0.0476199	0.0571439	0.0571439	0.417263	0.0411723	0.0316203	0.421999	0.0571439	0.0418146	0.0714299	0.0412673	0.0411723	0.0476199	0.0933603	0.0714299	0.12825	0.0714299	0.0933603	0.0714299	0.659999	0.0476199	0.0933603	0.0411723	0.0933603	0.0367619	0.0933603
Craniofacial Dysostosis	DOID:2339	0.0192322	0.222127	0.0609274	NA	0.0192322	0.0609274	0.0250878	NA	0.0337236	0.0512448	0.113285	0.0609274	0.0466468	0.0819002	NA	0.0609274	0.0819002	0.0609274	0.0609274	0.0337236	0.0152224	0.0819002	0.0250878	0.0819002	0.0819002	0.0664141	0.0467067	0.0256052	0.0337236	0.150724	0.0538103	0.0466468	0.0599485	0.0467067	0.0609274	0.0664141	0.113285	0.0976859	0.113285	0.0664141	0.113285	0.0337236	0.0609274	0.161291	0.0467067	0.161291	0.0369686	0.0664141
Colitis, Ulcerative	DOID:8577	0.0322586	0.0783424	0.0934083	NA	0.0322586	0.0934083	0.0384622	NA	0.0476199	0.0781974	0.45301	0.0934083	0.0613433	0.115648	NA	0.0934083	0.115648	0.0934083	0.0934083	0.0476199	0.0280133	0.115648	0.0384622	0.115648	0.115648	0.0823791	0.0783424	0.056008	0.0476199	0.115648	0.0822137	0.0613433	0.0839745	0.0783424	0.0934083	0.0823791	0.148977	0.115769	0.148977	0.0823791	0.148977	0.0476199	0.0934083	0.200064	0.0783424	0.200064	0.0680322	0.0823791
Beckwith-Wiedemann Syndrome	DOID:5572	0.10736	0.10736	0.115769	NA	0.10736	0.115769	0.115769	NA	0.12825	0.0943727	0.147106	0.115769	0.147106	0.12825	NA	0.115769	0.12825	0.115769	0.115769	0.12825	0.101627	0.12825	0.115769	0.12825	0.12825	0.176371	0.10736	0.094962	0.12825	0.12825	0.0999124	0.147106	0.0889973	0.10736	0.115769	0.176371	0.147106	0.543379	0.147106	0.176371	0.147106	0.12825	0.115769	0.176371	0.10736	0.176371	0.101627	0.176371
Aortic Aneurysm, Abdominal	DOID:7693	0.0262177	0.0636715	0.0783424	NA	0.0262177	0.144176	0.0322586	NA	0.0411723	0.065727	0.132409	0.0783424	0.0545214	0.09999	NA	0.0783424	0.09999	0.0783424	0.0783424	0.0411723	0.0220824	0.09999	0.0322586	0.09999	0.09999	0.0749632	0.302808	0.0419131	0.0411723	0.09999	0.0690634	0.0545214	0.0728749	0.0636715	0.144176	0.0749632	0.132409	0.10736	0.132409	0.0749632	0.132409	0.0411723	0.238225	0.182054	0.0636715	0.182054	0.0536287	0.0749632
Exocrine Pancreatic Insufficiency	DOID:13316	0.0545214	0.132409	0.148977	NA	0.0545214	0.148977	0.0613433	NA	0.0714299	0.12373	0.21027	0.148977	0.0865818	0.173473	NA	0.148977	0.173473	0.148977	0.148977	0.0714299	0.049858	0.319248	0.0613433	0.173473	0.319248	0.109892	0.132409	0.107888	0.0714299	0.173473	0.130357	0.0865818	0.12426	0.132409	0.148977	0.109892	0.386968	0.147106	0.386968	0.109892	0.21027	0.0714299	0.148977	0.266882	0.132409	0.266882	0.121084	0.109892
Multiple Sclerosis, Chronic Progressive	DOID:0050783	0.0262177	0.0636715	0.37258	NA	0.0262177	0.0783424	0.0322586	NA	0.0411723	0.12096	0.132409	0.144176	0.0545214	0.184015	NA	0.0783424	0.184015	0.238225	0.144176	0.0411723	0.0220824	0.09999	0.0322586	0.09999	0.09999	0.0749632	0.0636715	0.0771343	0.0411723	0.09999	0.0690634	0.0545214	0.273855	0.117177	0.0783424	0.0749632	0.132409	0.10736	0.132409	0.0749632	0.132409	0.0411723	0.0783424	0.182054	0.117177	0.33504	0.163075	0.0749632
Thrombocythemia, Essential	DOID:2224	0.142026	0.0192322	0.0250878	NA	0.142026	0.0250878	0.185269	NA	0.0819002	0.0211008	0.0466468	0.0250878	0.0466468	0.0337236	NA	0.0250878	0.0337236	0.0250878	0.0250878	0.249044	0.266387	0.0337236	0.185269	0.0337236	0.0337236	0.0664141	0.0192322	0.0105433	0.0337236	0.0337236	0.0221572	0.0466468	0.0246847	0.0192322	0.0250878	0.0664141	0.0466468	0.0976859	0.0466468	0.0664141	0.0466468	0.0337236	0.0250878	0.0664141	0.0192322	0.0664141	0.0152224	0.0664141
Microcephaly	DOID:10907	0.0749632	0.0749632	0.0823791	NA	0.0749632	0.0823791	0.0823791	NA	0.0933603	0.0679241	0.109892	0.0823791	0.109892	0.0933603	NA	0.0823791	0.0933603	0.0823791	0.0823791	0.0933603	0.0698989	0.0933603	0.0823791	0.0933603	0.0933603	0.135413	0.0749632	0.0640035	0.0933603	0.0933603	0.0716984	0.109892	0.066053	0.0749632	0.0823791	0.135413	0.109892	0.176371	0.109892	0.135413	0.109892	0.0933603	0.0823791	0.135413	0.0749632	0.135413	0.0698989	0.135413
Epilepsy, Rolandic	DOID:3329	0.0220824	0.0536287	0.206874	NA	0.0220824	0.0680322	0.0280133	NA	0.0367619	0.105197	0.121084	0.125202	0.049858	0.164303	NA	0.0680322	0.164303	0.323547	0.125202	0.0367619	0.0180216	0.089279	0.0280133	0.089279	0.089279	0.0698989	0.0536287	0.0593699	0.0367619	0.089279	0.0600399	0.049858	0.168627	0.0986948	0.0680322	0.0698989	0.121084	0.101627	0.121084	0.0698989	0.121084	0.0367619	0.0680322	0.169754	0.0986948	0.312405	0.468554	0.0698989
Fibrous Dysplasia, Polyostotic	DOID:1858	0.0411723	0.0411723	0.0476199	NA	0.0411723	0.0476199	0.0476199	NA	0.0571439	0.0397384	0.0714299	0.0476199	0.0714299	0.0571439	NA	0.0476199	0.0571439	0.0476199	0.0476199	0.0571439	0.0367619	0.0571439	0.0476199	0.0571439	0.0571439	0.417263	0.0411723	0.0316203	0.659999	0.0571439	0.0418146	0.0714299	0.0412673	0.0411723	0.0476199	0.0933603	0.0714299	0.12825	0.0714299	0.0933603	0.0714299	0.421999	0.0476199	0.0933603	0.0411723	0.0933603	0.0367619	0.0933603
HIV Infections	DOID:526	0.0749632	0.0749632	0.0823791	NA	0.0749632	0.0823791	0.0823791	NA	0.0933603	0.0679241	0.109892	0.0823791	0.109892	0.0933603	NA	0.0823791	0.0933603	0.0823791	0.0823791	0.0933603	0.0698989	0.0933603	0.0823791	0.0933603	0.0933603	0.135413	0.0749632	0.0640035	0.0933603	0.0933603	0.0716984	0.109892	0.066053	0.0749632	0.0823791	0.605211	0.109892	0.176371	0.109892	0.135413	0.109892	0.0933603	0.0823791	0.135413	0.0749632	0.135413	0.0698989	0.135413
Kidney Failure, Chronic	DOID:784	0.0411723	0.09999	0.115648	NA	0.0411723	0.115648	0.0476199	NA	0.0571439	0.0965077	0.173473	0.115648	0.0714299	0.138778	NA	0.115648	0.138778	0.115648	0.115648	0.0571439	0.0367619	0.138778	0.0476199	0.138778	0.138778	0.0933603	0.09999	0.0767921	0.0571439	0.138778	0.10155	0.0714299	0.10022	0.09999	0.115648	0.0933603	0.173473	0.12825	0.173473	0.0933603	0.173473	0.0571439	0.115648	0.226732	0.09999	0.226732	0.089279	0.0933603
Cytochrome-c Oxidase Deficiency	DOID:3762	0.0545214	0.0545214	0.0613433	NA	0.0545214	0.0613433	0.0613433	NA	0.0714299	0.0509475	0.0865818	0.0613433	0.0865818	0.0714299	NA	0.0613433	0.0714299	0.0613433	0.0613433	0.0714299	0.049858	0.0714299	0.0613433	0.0714299	0.0714299	0.109892	0.0545214	0.0444246	0.0714299	0.0714299	0.0536764	0.386968	0.051166	0.0545214	0.0613433	0.109892	0.0865818	0.147106	0.0865818	0.491152	0.0865818	0.0714299	0.0613433	0.109892	0.0545214	0.109892	0.049858	0.811538
Ichthyosis	DOID:1697	NA	NA	NA	NA	NA	NA	NA	NA	NA	NA	NA	NA	NA	NA	NA	NA	NA	NA	NA	NA	NA	NA	NA	NA	NA	NA	NA	NA	NA	NA	NA	NA	NA	NA	NA	NA	NA	NA	NA	NA	NA	NA	NA	NA	NA	NA	NA	NA
Bone Diseases	DOID:0080001	0.0545214	0.629709	0.148977	NA	0.0545214	0.148977	0.0613433	NA	0.0714299	0.12373	0.21027	0.148977	0.0865818	0.173473	NA	0.148977	0.173473	0.148977	0.148977	0.0714299	0.049858	0.173473	0.0613433	0.173473	0.173473	0.109892	0.132409	0.107888	0.0714299	0.319248	0.130357	0.0865818	0.12426	0.132409	0.148977	0.109892	0.21027	0.147106	0.21027	0.109892	0.21027	0.0714299	0.148977	0.266882	0.132409	0.266882	0.121084	0.109892
Connective Tissue Diseases	DOID:65	0.0749632	0.553591	0.200064	NA	0.0749632	0.200064	0.0823791	NA	0.0933603	0.164959	0.266882	0.200064	0.109892	0.226732	NA	0.200064	0.226732	0.200064	0.200064	0.0933603	0.0698989	0.226732	0.0823791	0.226732	0.226732	0.135413	0.182054	0.155437	0.0933603	0.417263	0.174125	0.109892	0.160414	0.182054	0.200064	0.135413	0.266882	0.176371	0.266882	0.135413	0.266882	0.0933603	0.200064	0.328859	0.182054	0.328859	0.169754	0.135413
Leydig Cell Tumor	DOID:2696	0.0783424	0.0322586	0.0384622	NA	0.0783424	0.0384622	0.0934083	NA	0.351665	0.0321989	0.0613433	0.0384622	0.0613433	0.0476199	NA	0.0384622	0.0476199	0.0384622	0.0384622	0.115648	0.0680322	0.0476199	0.0934083	0.0476199	0.0476199	0.0823791	0.0322586	0.0230621	0.0476199	0.0476199	0.0338527	0.0613433	0.0345777	0.0322586	0.0384622	0.0823791	0.0613433	0.115769	0.0613433	0.0823791	0.0613433	0.0476199	0.0384622	0.0823791	0.0322586	0.0823791	0.0280133	0.0823791
Aneurysm	DOID:178	0.0749632	0.182054	0.200064	NA	0.0749632	0.368184	0.0823791	NA	0.0933603	0.164959	0.266882	0.200064	0.109892	0.226732	NA	0.200064	0.226732	0.200064	0.200064	0.0933603	0.0698989	0.226732	0.0823791	0.226732	0.226732	0.135413	0.553591	0.155437	0.0933603	0.226732	0.174125	0.109892	0.160414	0.182054	0.368184	0.135413	0.266882	0.176371	0.266882	0.135413	0.266882	0.0933603	0.608356	0.328859	0.182054	0.328859	0.169754	0.135413
Behcet Syndrome	DOID:13241	0.0411723	0.09999	0.115648	NA	0.0411723	0.212832	0.0476199	NA	0.0571439	0.0965077	0.173473	0.115648	0.0714299	0.138778	NA	0.115648	0.138778	0.115648	0.115648	0.0571439	0.0367619	0.138778	0.0476199	0.138778	0.138778	0.0933603	0.304051	0.0767921	0.0571439	0.138778	0.10155	0.0714299	0.10022	0.09999	0.212832	0.0933603	0.173473	0.12825	0.173473	0.0933603	0.173473	0.0571439	0.351665	0.226732	0.09999	0.226732	0.089279	0.0933603
Infertility, Female	DOID:13589	0.0411723	0.09999	0.115648	NA	0.0411723	0.115648	0.0476199	NA	0.0571439	0.0965077	0.173473	0.115648	0.0714299	0.138778	NA	0.115648	0.138778	0.115648	0.115648	0.0571439	0.0367619	0.138778	0.0476199	0.138778	0.138778	0.0933603	0.09999	0.0767921	0.0571439	0.138778	0.10155	0.0714299	0.10022	0.09999	0.115648	0.0933603	0.173473	0.12825	0.173473	0.0933603	0.173473	0.0571439	0.115648	0.226732	0.09999	0.226732	0.089279	0.0933603
Glioma	DOID:3070	0.243677	0.0545214	0.0613433	NA	0.243677	0.0613433	0.274167	NA	0.173473	0.0509475	0.0865818	0.0613433	0.0865818	0.0714299	NA	0.0613433	0.0714299	0.0613433	0.0613433	0.319248	0.222835	0.0714299	0.274167	0.0714299	0.0714299	0.109892	0.0545214	0.0444246	0.0714299	0.0714299	0.0536764	0.0865818	0.051166	0.0545214	0.0613433	0.109892	0.0865818	0.147106	0.0865818	0.109892	0.0865818	0.0714299	0.0613433	0.109892	0.0545214	0.109892	0.049858	0.109892
Fanconi Syndrome	DOID:1062	0.0411723	0.09999	0.115648	NA	0.0411723	0.115648	0.0476199	NA	0.0571439	0.0965077	0.173473	0.115648	0.0714299	0.138778	NA	0.115648	0.138778	0.115648	0.115648	0.0571439	0.0367619	0.138778	0.0476199	0.138778	0.138778	0.0933603	0.09999	0.0767921	0.0571439	0.138778	0.10155	0.0714299	0.10022	0.09999	0.115648	0.0933603	0.173473	0.12825	0.173473	0.0933603	0.173473	0.0571439	0.115648	0.226732	0.09999	0.226732	0.089279	0.0933603
Pseudohypoaldosteronism	DOID:4479	0.0411723	0.09999	0.115648	NA	0.0411723	0.115648	0.0476199	NA	0.0571439	0.0965077	0.173473	0.115648	0.0714299	0.138778	NA	0.115648	0.138778	0.115648	0.115648	0.0571439	0.0367619	0.138778	0.0476199	0.138778	0.138778	0.0933603	0.09999	0.0767921	0.0571439	0.138778	0.10155	0.0714299	0.10022	0.09999	0.115648	0.0933603	0.173473	0.12825	0.173473	0.0933603	0.173473	0.0571439	0.115648	0.226732	0.09999	0.226732	0.089279	0.0933603
Creutzfeldt-Jakob Syndrome	DOID:11949	0.0322586	0.0783424	0.284037	NA	0.0322586	0.0934083	0.0384622	NA	0.0476199	0.143909	0.148977	0.171903	0.0613433	0.212832	NA	0.0934083	0.212832	0.673076	0.171903	0.0476199	0.0280133	0.115648	0.0384622	0.115648	0.115648	0.0823791	0.0783424	0.103074	0.0476199	0.115648	0.0822137	0.0613433	0.225108	0.144176	0.0934083	0.0823791	0.148977	0.115769	0.148977	0.0823791	0.148977	0.0476199	0.0934083	0.200064	0.144176	0.368184	0.323547	0.0823791
Gangliosidosis, GM1	DOID:3322	0.0215554	0.0523489	0.1954	NA	0.0215554	0.0642591	0.0264596	NA	0.0336539	0.102173	0.107671	0.118258	0.0443352	0.150412	NA	0.0642591	0.150412	0.305603	0.118258	0.0336539	0.0181849	0.081731	0.0264596	0.081731	0.081731	0.0604798	0.0523489	0.0636405	0.0336539	0.081731	0.0578805	0.198151	0.164819	0.0963396	0.0642591	0.0604798	0.107671	0.0855538	0.107671	0.270308	0.107671	0.0336539	0.0642591	0.14688	0.0963396	0.270308	0.210032	0.270308
Myasthenia Gravis	DOID:437	0.0250848	0.0609202	0.133275	NA	0.0250848	0.0724188	0.0298195	NA	0.0367575	0.11581	0.114243	0.133275	0.0470412	0.42454	NA	0.0724188	0.271448	0.133275	0.133275	0.0367575	0.0218283	0.0892681	0.0298195	0.0892681	0.0892681	0.0625464	0.0609202	0.0805088	0.0367575	0.0892681	0.120549	0.0470412	0.210238	0.112114	0.0724188	0.0625464	0.114243	0.086536	0.114243	0.0625464	0.114243	0.0367575	0.0724188	0.151898	0.112114	0.279544	0.0975589	0.0625464
Hydrocephalus	DOID:10908	0.028986	0.0703946	0.254874	NA	0.028986	0.0838176	0.0345131	NA	0.0426447	0.131329	0.133011	0.154253	0.0547694	0.190596	NA	0.0838176	0.190596	0.398619	0.154253	0.0426447	0.0251949	0.103566	0.0345131	0.103566	0.103566	0.073214	0.0703946	0.0928047	0.0426447	0.103566	0.0746915	0.0547694	0.207528	0.12955	0.0838176	0.073214	0.133011	0.102146	0.133011	0.073214	0.133011	0.0426447	0.0838176	0.177805	0.12955	0.327222	0.290995	0.073214
Sweat Gland Diseases	DOID:1383	0.0545214	0.132409	0.148977	NA	0.0545214	0.148977	0.0613433	NA	0.0714299	0.12373	0.21027	0.148977	0.0865818	0.173473	NA	0.148977	0.173473	0.148977	0.148977	0.0714299	0.049858	0.173473	0.0613433	0.173473	0.173473	0.109892	0.132409	0.107888	0.0714299	0.173473	0.130357	0.0865818	0.12426	0.132409	0.148977	0.109892	0.21027	0.147106	0.21027	0.109892	0.639393	0.0714299	0.148977	0.811538	0.132409	0.266882	0.121084	0.109892
Duane Retraction Syndrome	DOID:12557	0.0215554	0.0523489	0.118258	NA	0.0215554	0.0642591	0.0264596	NA	0.0336539	0.313495	0.107671	0.568305	0.0443352	0.248529	NA	0.0642591	0.588933	0.118258	0.390632	0.0336539	0.0181849	0.081731	0.0264596	0.081731	0.081731	0.0604798	0.0523489	0.178723	0.0336539	0.081731	0.0578805	0.0443352	0.19057	0.30559	0.0642591	0.0604798	0.107671	0.0855538	0.107671	0.0604798	0.107671	0.0336539	0.0642591	0.14688	0.210042	0.270308	0.0812755	0.0604798
Rubinstein-Taybi Syndrome	DOID:1933	0.0411723	0.0411723	0.0476199	NA	0.0411723	0.0476199	0.0476199	NA	0.0571439	0.0397384	0.0714299	0.0476199	0.0714299	0.0571439	NA	0.0476199	0.0571439	0.0476199	0.0476199	0.0571439	0.0367619	0.0571439	0.0476199	0.0571439	0.0571439	0.417263	0.0411723	0.0316203	0.659999	0.0571439	0.0418146	0.0714299	0.0412673	0.0411723	0.0476199	0.0933603	0.0714299	0.12825	0.0714299	0.0933603	0.0714299	0.421999	0.0476199	0.0933603	0.0411723	0.0933603	0.0367619	0.0933603
Motor Neuron Disease	DOID:230	0.0322586	0.0783424	0.44423	NA	0.0322586	0.0934083	0.0384622	NA	0.0476199	0.143909	0.148977	0.171903	0.0613433	0.212832	NA	0.0934083	0.212832	0.284037	0.171903	0.0476199	0.0280133	0.115648	0.0384622	0.115648	0.115648	0.0823791	0.0783424	0.103074	0.0476199	0.115648	0.0822137	0.0613433	0.325918	0.144176	0.0934083	0.0823791	0.148977	0.115769	0.148977	0.0823791	0.148977	0.0476199	0.0934083	0.200064	0.144176	0.368184	0.206874	0.0823791
Night Blindness	DOID:8499	0.0262177	0.0636715	0.144176	NA	0.0262177	0.0783424	0.0322586	NA	0.0411723	0.634641	0.132409	0.564516	0.0545214	0.184015	NA	0.0783424	0.184015	0.144176	0.564516	0.0411723	0.0220824	0.09999	0.0322586	0.09999	0.09999	0.0749632	0.0636715	0.448709	0.0411723	0.09999	0.0690634	0.0545214	0.134114	0.458801	0.0783424	0.0749632	0.132409	0.10736	0.132409	0.0749632	0.132409	0.0411723	0.0783424	0.182054	0.302808	0.33504	0.0986948	0.0749632
Soft Tissue Neoplasms	DOID:0060123	0.09999	0.0411723	0.0476199	NA	0.09999	0.0476199	0.115648	NA	0.421999	0.0397384	0.0714299	0.0476199	0.0714299	0.0571439	NA	0.0476199	0.0571439	0.0476199	0.0476199	0.138778	0.089279	0.0571439	0.115648	0.0571439	0.0571439	0.0933603	0.0411723	0.0316203	0.0571439	0.0571439	0.0418146	0.0714299	0.0412673	0.0411723	0.0476199	0.0933603	0.0714299	0.12825	0.0714299	0.0933603	0.0714299	0.0571439	0.0476199	0.0933603	0.0411723	0.0933603	0.0367619	0.0933603
Methemoglobinemia	DOID:10783	0.0192322	0.0467067	0.0609274	NA	0.0192322	0.0609274	0.0250878	NA	0.0337236	0.0512448	0.113285	0.0609274	0.0466468	0.0819002	NA	0.0609274	0.0819002	0.0609274	0.0609274	0.0337236	0.0152224	0.0819002	0.0250878	0.0819002	0.0819002	0.0664141	0.0467067	0.0256052	0.0337236	0.0819002	0.163627	0.0466468	0.0599485	0.0467067	0.0609274	0.0664141	0.113285	0.0976859	0.113285	0.0664141	0.113285	0.0337236	0.0609274	0.161291	0.0467067	0.161291	0.0369686	0.0664141
Pulmonary Disease, Chronic Obstructive	DOID:3083	0.0322586	0.0783424	0.0934083	NA	0.0322586	0.0934083	0.0384622	NA	0.0476199	0.0781974	0.148977	0.0934083	0.0613433	0.115648	NA	0.44423	0.115648	0.0934083	0.0934083	0.0476199	0.0280133	0.115648	0.0384622	0.833333	0.115648	0.0823791	0.0783424	0.056008	0.0476199	0.115648	0.0822137	0.0613433	0.0839745	0.0783424	0.0934083	0.0823791	0.148977	0.115769	0.148977	0.0823791	0.148977	0.0476199	0.0934083	0.200064	0.0783424	0.200064	0.0680322	0.0823791
Dwarfism	DOID:9405	NA	NA	NA	NA	NA	NA	NA	NA	NA	NA	NA	NA	NA	NA	NA	NA	NA	NA	NA	NA	NA	NA	NA	NA	NA	NA	NA	NA	NA	NA	NA	NA	NA	NA	NA	NA	NA	NA	NA	NA	NA	NA	NA	NA	NA	NA	NA	NA
Fatigue Syndrome, Chronic	DOID:8544	0.10736	0.10736	0.115769	NA	0.10736	0.115769	0.115769	NA	0.12825	0.0943727	0.147106	0.115769	0.147106	0.12825	NA	0.115769	0.12825	0.115769	0.115769	0.12825	0.101627	0.12825	0.115769	0.12825	0.12825	0.176371	0.10736	0.094962	0.12825	0.12825	0.0999124	0.147106	0.0889973	0.10736	0.115769	0.176371	0.147106	0.543379	0.147106	0.176371	0.147106	0.12825	0.115769	0.176371	0.10736	0.176371	0.101627	0.176371
Vesico-Ureteral Reflux	DOID:9620	0.0545214	0.132409	0.148977	NA	0.0545214	0.148977	0.0613433	NA	0.0714299	0.12373	0.21027	0.148977	0.0865818	0.173473	NA	0.148977	0.173473	0.148977	0.148977	0.0714299	0.049858	0.173473	0.0613433	0.173473	0.173473	0.109892	0.132409	0.107888	0.0714299	0.173473	0.130357	0.0865818	0.12426	0.132409	0.148977	0.109892	0.21027	0.147106	0.21027	0.109892	0.21027	0.0714299	0.148977	0.266882	0.132409	0.266882	0.121084	0.109892
Migraine with Aura	DOID:10024	0.0322586	0.0783424	0.284037	NA	0.0322586	0.0934083	0.0384622	NA	0.0476199	0.143909	0.148977	0.171903	0.0613433	0.212832	NA	0.0934083	0.212832	0.44423	0.171903	0.0476199	0.0280133	0.115648	0.0384622	0.115648	0.115648	0.0823791	0.0783424	0.103074	0.0476199	0.115648	0.0822137	0.0613433	0.225108	0.144176	0.0934083	0.0823791	0.148977	0.115769	0.148977	0.0823791	0.148977	0.0476199	0.0934083	0.200064	0.144176	0.368184	0.323547	0.0823791
Incontinentia Pigmenti	DOID:12305	0.0411723	0.09999	0.115648	NA	0.0411723	0.115648	0.0476199	NA	0.0571439	0.0965077	0.173473	0.115648	0.0714299	0.138778	NA	0.115648	0.138778	0.115648	0.115648	0.0571439	0.0367619	0.138778	0.0476199	0.138778	0.138778	0.0933603	0.09999	0.0767921	0.0571439	0.138778	0.10155	0.0714299	0.10022	0.09999	0.115648	0.0933603	0.173473	0.12825	0.173473	0.0933603	0.527499	0.0571439	0.115648	0.689451	0.09999	0.226732	0.089279	0.0933603
Rhabdomyosarcoma	DOID:3247	0.302808	0.0262177	0.0322586	NA	0.302808	0.0322586	0.238225	NA	0.09999	0.0270641	0.0545214	0.0322586	0.0545214	0.0411723	NA	0.0322586	0.0411723	0.0322586	0.0322586	0.304051	0.163075	0.0411723	0.238225	0.0411723	0.0411723	0.0749632	0.0262177	0.0172584	0.0411723	0.0411723	0.0284379	0.0545214	0.0300073	0.0262177	0.0322586	0.0749632	0.0545214	0.10736	0.0545214	0.0749632	0.0545214	0.0411723	0.0322586	0.0749632	0.0262177	0.0749632	0.0220824	0.0749632
Lymphohistiocytosis, Hemophagocytic	DOID:0050120	0.0545214	0.132409	0.148977	NA	0.0545214	0.148977	0.0613433	NA	0.0714299	0.12373	0.21027	0.148977	0.0865818	0.173473	NA	0.148977	0.173473	0.148977	0.148977	0.0714299	0.049858	0.173473	0.0613433	0.173473	0.173473	0.109892	0.132409	0.107888	0.0714299	0.173473	0.239901	0.0865818	0.12426	0.132409	0.148977	0.109892	0.21027	0.147106	0.21027	0.109892	0.21027	0.0714299	0.148977	0.266882	0.132409	0.266882	0.121084	0.109892
Learning Disorders	DOID:8927	0.0545214	0.0545214	0.0613433	NA	0.0545214	0.0613433	0.0613433	NA	0.0714299	0.0509475	0.0865818	0.0613433	0.21027	0.0714299	NA	0.0613433	0.0714299	0.0613433	0.0613433	0.0714299	0.049858	0.0714299	0.0613433	0.0714299	0.0714299	0.109892	0.0545214	0.0444246	0.0714299	0.0714299	0.0536764	0.0865818	0.051166	0.0545214	0.0613433	0.109892	0.0865818	0.147106	0.0865818	0.109892	0.0865818	0.0714299	0.0613433	0.109892	0.0545214	0.109892	0.049858	0.109892
Hypothyroidism	DOID:1459	0.0545214	0.132409	0.148977	NA	0.0545214	0.148977	0.0613433	NA	0.0714299	0.12373	0.21027	0.148977	0.0865818	0.173473	NA	0.148977	0.173473	0.148977	0.148977	0.0714299	0.049858	0.319248	0.0613433	0.173473	0.319248	0.109892	0.132409	0.107888	0.0714299	0.173473	0.130357	0.0865818	0.12426	0.132409	0.148977	0.109892	0.386968	0.147106	0.386968	0.109892	0.21027	0.0714299	0.148977	0.266882	0.132409	0.266882	0.121084	0.109892
Long QT Syndrome	DOID:2843	0.0545214	0.0545214	0.0613433	NA	0.0545214	0.0613433	0.0613433	NA	0.0714299	0.0509475	0.0865818	0.0613433	0.0865818	0.0714299	NA	0.0613433	0.0714299	0.0613433	0.0613433	0.0714299	0.049858	0.0714299	0.0613433	0.0714299	0.0714299	0.491152	0.0545214	0.0444246	0.527499	0.0714299	0.0536764	0.0865818	0.051166	0.0545214	0.0613433	0.109892	0.0865818	0.147106	0.0865818	0.109892	0.0865818	0.527499	0.0613433	0.109892	0.0545214	0.109892	0.049858	0.109892
Kuru	DOID:648	0.0322586	0.0783424	0.284037	NA	0.0322586	0.0934083	0.0384622	NA	0.0476199	0.143909	0.148977	0.171903	0.0613433	0.212832	NA	0.0934083	0.212832	0.673076	0.171903	0.0476199	0.0280133	0.115648	0.0384622	0.115648	0.115648	0.0823791	0.0783424	0.103074	0.0476199	0.115648	0.0822137	0.0613433	0.225108	0.144176	0.0934083	0.0823791	0.148977	0.115769	0.148977	0.0823791	0.148977	0.0476199	0.0934083	0.200064	0.144176	0.368184	0.323547	0.0823791
Anodontia	DOID:0050591	0.0411723	0.09999	0.115648	NA	0.0411723	0.115648	0.0476199	NA	0.0571439	0.0965077	0.319248	0.115648	0.0714299	0.138778	NA	0.115648	0.138778	0.115648	0.115648	0.0571439	0.0367619	0.138778	0.0476199	0.138778	0.138778	0.0933603	0.09999	0.0767921	0.0571439	0.138778	0.10155	0.0714299	0.10022	0.09999	0.115648	0.0933603	0.173473	0.12825	0.173473	0.0933603	0.173473	0.0571439	0.115648	0.226732	0.09999	0.226732	0.089279	0.0933603
Stomach Neoplasms	DOID:10534	0.304051	0.0411723	0.0476199	NA	0.304051	0.0476199	0.549999	NA	0.138778	0.0397384	0.0714299	0.0476199	0.0714299	0.0571439	NA	0.0476199	0.0571439	0.0476199	0.0476199	0.659999	0.271481	0.0571439	0.351665	0.0571439	0.0571439	0.0933603	0.0411723	0.0316203	0.0571439	0.0571439	0.0418146	0.0714299	0.0412673	0.0411723	0.0476199	0.0933603	0.0714299	0.12825	0.0714299	0.0933603	0.0714299	0.0571439	0.0476199	0.0933603	0.0411723	0.0933603	0.0367619	0.0933603
Cardiomyopathies	DOID:0050700	0.041946	0.154965	0.114243	NA	0.041946	0.347392	0.0470412	NA	0.0545145	0.0987853	0.159332	0.114243	0.0656074	0.132392	NA	0.114243	0.132392	0.114243	0.114243	0.0545145	0.0384438	0.132392	0.0470412	0.132392	0.132392	0.0823681	0.187473	0.0834058	0.0545145	0.707507	0.102965	0.0656074	0.101664	0.101869	0.347392	0.0823681	0.159332	0.108385	0.159332	0.0823681	0.159332	0.0545145	0.210245	0.200037	0.101869	0.200037	0.0933635	0.0823681
Diabetic Retinopathy	DOID:8947	0.0220824	0.0536287	0.125202	NA	0.0220824	0.0680322	0.0280133	NA	0.0367619	0.54348	0.121084	0.490223	0.049858	0.164303	NA	0.0680322	0.164303	0.125202	0.490223	0.0367619	0.0180216	0.089279	0.0280133	0.089279	0.089279	0.0698989	0.0536287	0.34537	0.0367619	0.089279	0.0600399	0.049858	0.120054	0.386435	0.0680322	0.0698989	0.121084	0.101627	0.121084	0.0698989	0.121084	0.0367619	0.0680322	0.169754	0.255047	0.312405	0.0805457	0.0698989
Hernia	DOID:1283	0.0328842	0.0798616	0.0921134	NA	0.0328842	0.0921134	0.037929	NA	0.0453304	0.0795472	0.415918	0.0921134	0.0563205	0.110088	NA	0.0921134	0.110088	0.0921134	0.0921134	0.0453304	0.0294172	0.110088	0.037929	0.110088	0.110088	0.0729353	0.0798616	0.0615857	0.0453304	0.110088	0.0829417	0.0563205	0.0843462	0.0798616	0.0921134	0.0729353	0.136778	0.0987475	0.136778	0.0729353	0.136778	0.0453304	0.0921134	0.177129	0.0798616	0.177129	0.0714418	0.0729353
Cerebellar Diseases	DOID:2786	0.0411723	0.09999	0.351665	NA	0.0411723	0.115648	0.0476199	NA	0.0571439	0.177607	0.173473	0.212832	0.0714299	0.255398	NA	0.115648	0.255398	0.549999	0.212832	0.0571439	0.0367619	0.138778	0.0476199	0.138778	0.138778	0.0933603	0.09999	0.141323	0.0571439	0.138778	0.10155	0.0714299	0.274072	0.184015	0.115648	0.0933603	0.173473	0.12825	0.173473	0.0933603	0.173473	0.0571439	0.115648	0.226732	0.184015	0.417263	0.424592	0.0933603
Gastroesophageal Reflux	DOID:8534	0.0749632	0.182054	0.200064	NA	0.0749632	0.200064	0.0823791	NA	0.0933603	0.164959	0.491152	0.200064	0.109892	0.226732	NA	0.200064	0.226732	0.200064	0.200064	0.0933603	0.0698989	0.226732	0.0823791	0.226732	0.226732	0.135413	0.182054	0.155437	0.0933603	0.226732	0.174125	0.109892	0.160414	0.182054	0.200064	0.135413	0.266882	0.176371	0.266882	0.135413	0.266882	0.0933603	0.200064	0.328859	0.182054	0.328859	0.169754	0.135413
Narcolepsy	DOID:8986	0.0749632	0.0749632	0.0823791	NA	0.0749632	0.0823791	0.0823791	NA	0.0933603	0.0679241	0.109892	0.0823791	0.266882	0.0933603	NA	0.0823791	0.0933603	0.0823791	0.0823791	0.0933603	0.0698989	0.0933603	0.0823791	0.0933603	0.0933603	0.135413	0.0749632	0.0640035	0.0933603	0.0933603	0.0716984	0.109892	0.066053	0.0749632	0.0823791	0.135413	0.109892	0.176371	0.109892	0.135413	0.109892	0.0933603	0.0823791	0.135413	0.0749632	0.135413	0.0698989	0.135413
Psychotic Disorders	DOID:11328	0.0545214	0.0545214	0.0613433	NA	0.0545214	0.0613433	0.0613433	NA	0.0714299	0.0509475	0.0865818	0.0613433	0.386968	0.0714299	NA	0.0613433	0.0714299	0.0613433	0.0613433	0.0714299	0.049858	0.0714299	0.0613433	0.0714299	0.0714299	0.109892	0.0545214	0.0444246	0.0714299	0.0714299	0.0536764	0.0865818	0.051166	0.0545214	0.0613433	0.109892	0.0865818	0.147106	0.0865818	0.109892	0.0865818	0.0714299	0.0613433	0.109892	0.0545214	0.109892	0.049858	0.109892
Cocaine-Related Disorders	DOID:809	0.0545214	0.0545214	0.0613433	NA	0.0545214	0.0613433	0.0613433	NA	0.0714299	0.0509475	0.0865818	0.0613433	0.21027	0.0714299	NA	0.0613433	0.0714299	0.0613433	0.0613433	0.0714299	0.049858	0.0714299	0.0613433	0.0714299	0.0714299	0.109892	0.0545214	0.0444246	0.0714299	0.0714299	0.0536764	0.0865818	0.051166	0.0545214	0.0613433	0.109892	0.0865818	0.147106	0.0865818	0.109892	0.0865818	0.0714299	0.0613433	0.109892	0.0545214	0.109892	0.049858	0.109892
Gilbert Disease	DOID:2739	0.0545214	0.0545214	0.0613433	NA	0.0545214	0.0613433	0.0613433	NA	0.0714299	0.0509475	0.0865818	0.0613433	0.0865818	0.0714299	NA	0.0613433	0.0714299	0.0613433	0.0613433	0.0714299	0.049858	0.0714299	0.0613433	0.0714299	0.0714299	0.109892	0.0545214	0.0444246	0.0714299	0.0714299	0.0536764	0.386968	0.051166	0.0545214	0.0613433	0.109892	0.0865818	0.147106	0.0865818	0.491152	0.0865818	0.0714299	0.0613433	0.109892	0.0545214	0.109892	0.049858	0.491152
Carcinoma, Basal Cell	DOID:2513	0.193613	0.0262177	0.0322586	NA	0.193613	0.0322586	0.238225	NA	0.09999	0.0270641	0.0545214	0.0322586	0.0545214	0.0411723	NA	0.0322586	0.0411723	0.0322586	0.0322586	0.304051	0.163075	0.0411723	0.238225	0.0411723	0.0411723	0.0749632	0.0262177	0.0172584	0.0411723	0.0411723	0.0284379	0.0545214	0.0300073	0.0262177	0.0322586	0.0749632	0.0545214	0.10736	0.0545214	0.0749632	0.0545214	0.0411723	0.0322586	0.0749632	0.0262177	0.0749632	0.0220824	0.0749632
Blepharospasm	DOID:529	0.0220824	0.0536287	0.206874	NA	0.0220824	0.0680322	0.0280133	NA	0.0367619	0.105197	0.121084	0.125202	0.049858	0.164303	NA	0.0680322	0.164303	0.323547	0.125202	0.0367619	0.0180216	0.089279	0.0280133	0.089279	0.089279	0.0698989	0.0536287	0.0593699	0.0367619	0.089279	0.0600399	0.049858	0.168627	0.0986948	0.0680322	0.0698989	0.121084	0.101627	0.121084	0.0698989	0.121084	0.0367619	0.0680322	0.169754	0.0986948	0.312405	0.208146	0.0698989
Heart Valve Diseases	DOID:4079	0.0545214	0.132409	0.148977	NA	0.0545214	0.708501	0.0613433	NA	0.0714299	0.12373	0.21027	0.148977	0.0865818	0.173473	NA	0.148977	0.173473	0.148977	0.148977	0.0714299	0.049858	0.173473	0.0613433	0.173473	0.173473	0.109892	0.243677	0.107888	0.0714299	0.173473	0.130357	0.0865818	0.12426	0.132409	0.708501	0.109892	0.21027	0.147106	0.21027	0.109892	0.21027	0.0714299	0.274167	0.266882	0.132409	0.266882	0.121084	0.109892
Carcinoma, Small Cell	DOID:5411	0.163075	0.0220824	0.0280133	NA	0.163075	0.0280133	0.206874	NA	0.089279	0.0235373	0.049858	0.0280133	0.049858	0.0367619	NA	0.0280133	0.0367619	0.0280133	0.0280133	0.271481	0.133087	0.0367619	0.206874	0.0367619	0.0367619	0.0698989	0.0220824	0.0132837	0.0367619	0.0367619	0.0247223	0.049858	0.0268613	0.0220824	0.0280133	0.0698989	0.049858	0.101627	0.049858	0.0698989	0.049858	0.0367619	0.0280133	0.0698989	0.0220824	0.0698989	0.0180216	0.0698989
Pseudopseudohypoparathyroidism	DOID:4183	0.0411723	0.0411723	0.0476199	NA	0.0411723	0.0476199	0.0476199	NA	0.0571439	0.0397384	0.0714299	0.0476199	0.0714299	0.0571439	NA	0.0476199	0.0571439	0.0476199	0.0476199	0.0571439	0.0367619	0.0571439	0.0476199	0.0571439	0.0571439	0.0933603	0.0411723	0.0316203	0.0571439	0.0571439	0.0418146	0.319248	0.0412673	0.0411723	0.0476199	0.0933603	0.0714299	0.12825	0.0714299	0.417263	0.0714299	0.0571439	0.0476199	0.0933603	0.0411723	0.0933603	0.0367619	0.417263
Carcinoma, Papillary	DOID:3113	0.184015	0.0411723	0.0476199	NA	0.184015	0.0476199	0.212832	NA	0.138778	0.0397384	0.0714299	0.0476199	0.0714299	0.0571439	NA	0.0476199	0.0571439	0.0476199	0.0476199	0.255398	0.164303	0.0571439	0.212832	0.0571439	0.0571439	0.0933603	0.0411723	0.0316203	0.0571439	0.0571439	0.0418146	0.0714299	0.0412673	0.0411723	0.0476199	0.0933603	0.0714299	0.12825	0.0714299	0.0933603	0.0714299	0.0571439	0.0476199	0.0933603	0.0411723	0.0933603	0.0367619	0.0933603
Osteoarthropathy, Primary Hypertrophic	DOID:14283	0.10736	0.10736	0.115769	NA	0.10736	0.115769	0.115769	NA	0.12825	0.0943727	0.147106	0.115769	0.147106	0.12825	NA	0.115769	0.12825	0.115769	0.115769	0.12825	0.101627	0.12825	0.115769	0.12825	0.12825	0.176371	0.10736	0.094962	0.12825	0.12825	0.0999124	0.147106	0.0889973	0.10736	0.115769	0.176371	0.147106	0.543379	0.147106	0.176371	0.147106	0.12825	0.115769	0.176371	0.10736	0.176371	0.101627	0.176371
Rhinitis, Allergic, Perennial	DOID:4481	0.0262177	0.0636715	0.0783424	NA	0.0262177	0.0783424	0.0322586	NA	0.0411723	0.065727	0.132409	0.0783424	0.0545214	0.09999	NA	0.144176	0.09999	0.0783424	0.0783424	0.0411723	0.0220824	0.09999	0.0322586	0.184015	0.09999	0.0749632	0.0636715	0.0419131	0.0411723	0.09999	0.0690634	0.0545214	0.0728749	0.0636715	0.0783424	0.0749632	0.132409	0.10736	0.132409	0.0749632	0.132409	0.0411723	0.0783424	0.182054	0.0636715	0.182054	0.0536287	0.0749632
Orofaciodigital Syndromes	DOID:4501	0.10736	0.10736	0.115769	NA	0.10736	0.115769	0.115769	NA	0.12825	0.0943727	0.147106	0.115769	0.147106	0.12825	NA	0.115769	0.12825	0.115769	0.115769	0.12825	0.101627	0.12825	0.115769	0.12825	0.12825	0.428329	0.10736	0.094962	0.311463	0.12825	0.0999124	0.147106	0.0889973	0.10736	0.115769	0.176371	0.147106	0.223744	0.147106	0.176371	0.147106	0.311463	0.115769	0.176371	0.10736	0.176371	0.101627	0.176371
Hyperprolactinemia	DOID:12700	0.0749632	0.0749632	0.0823791	NA	0.0749632	0.0823791	0.0823791	NA	0.0933603	0.0679241	0.109892	0.0823791	0.109892	0.0933603	NA	0.0823791	0.0933603	0.0823791	0.0823791	0.0933603	0.0698989	0.0933603	0.0823791	0.0933603	0.0933603	0.135413	0.0749632	0.0640035	0.0933603	0.0933603	0.0716984	0.266882	0.066053	0.0749632	0.0823791	0.135413	0.109892	0.176371	0.109892	0.328859	0.109892	0.0933603	0.0823791	0.135413	0.0749632	0.135413	0.0698989	0.328859
Megacolon	DOID:11372	0.0411723	0.09999	0.115648	NA	0.0411723	0.115648	0.0476199	NA	0.0571439	0.0965077	0.527499	0.115648	0.0714299	0.138778	NA	0.115648	0.138778	0.115648	0.115648	0.0571439	0.0367619	0.138778	0.0476199	0.138778	0.138778	0.0933603	0.09999	0.0767921	0.0571439	0.138778	0.10155	0.0714299	0.10022	0.09999	0.115648	0.0933603	0.173473	0.12825	0.173473	0.0933603	0.173473	0.0571439	0.115648	0.226732	0.09999	0.226732	0.089279	0.0933603
Thyroid Neoplasms	DOID:1781	0.304051	0.0411723	0.0476199	NA	0.304051	0.0476199	0.351665	NA	0.138778	0.0397384	0.0714299	0.0476199	0.0714299	0.0571439	NA	0.0476199	0.0571439	0.0476199	0.0476199	0.421999	0.271481	0.0571439	0.549999	0.0571439	0.0571439	0.0933603	0.0411723	0.0316203	0.0571439	0.0571439	0.0418146	0.0714299	0.0412673	0.0411723	0.0476199	0.0933603	0.0714299	0.12825	0.0714299	0.0933603	0.0714299	0.0571439	0.0476199	0.0933603	0.0411723	0.0933603	0.0367619	0.0933603
Asperger Syndrome	DOID:0050432	0.0411723	0.0411723	0.0476199	NA	0.0411723	0.0476199	0.0476199	NA	0.0571439	0.0397384	0.0714299	0.0476199	0.173473	0.0571439	NA	0.0476199	0.0571439	0.0476199	0.0476199	0.0571439	0.0367619	0.0571439	0.0476199	0.0571439	0.0571439	0.0933603	0.0411723	0.0316203	0.0571439	0.0571439	0.0418146	0.0714299	0.0412673	0.0411723	0.0476199	0.0933603	0.0714299	0.12825	0.0714299	0.0933603	0.0714299	0.0571439	0.0476199	0.0933603	0.0411723	0.0933603	0.0367619	0.0933603
Empty Sella Syndrome	DOID:3642	0.0545214	0.132409	0.148977	NA	0.0545214	0.148977	0.0613433	NA	0.0714299	0.12373	0.21027	0.148977	0.0865818	0.173473	NA	0.148977	0.173473	0.148977	0.148977	0.0714299	0.049858	0.319248	0.0613433	0.173473	0.319248	0.109892	0.132409	0.107888	0.0714299	0.173473	0.130357	0.0865818	0.12426	0.132409	0.148977	0.109892	0.386968	0.147106	0.386968	0.109892	0.21027	0.0714299	0.148977	0.266882	0.132409	0.266882	0.121084	0.109892
Arrhythmogenic Right Ventricular Dysplasia	DOID:0050431	0.0282938	0.109133	0.0817922	NA	0.0282938	0.248715	0.0336792	NA	0.0415966	0.0698882	0.12966	0.0817922	0.0533895	0.10102	NA	0.0817922	0.10102	0.0817922	0.0817922	0.0415966	0.0245981	0.10102	0.0336792	0.10102	0.10102	0.0713009	0.126456	0.0492449	0.0415966	0.596276	0.073079	0.0533895	0.0759851	0.0687134	0.248715	0.0713009	0.12966	0.0993274	0.12966	0.0713009	0.12966	0.0415966	0.150525	0.173159	0.0687134	0.173159	0.0597381	0.0713009
Liver Cirrhosis	DOID:5082	0.0411723	0.09999	0.115648	NA	0.0411723	0.115648	0.0476199	NA	0.0571439	0.0965077	0.319248	0.115648	0.0714299	0.138778	NA	0.115648	0.138778	0.115648	0.115648	0.0571439	0.0367619	0.138778	0.0476199	0.138778	0.138778	0.0933603	0.09999	0.0767921	0.0571439	0.138778	0.10155	0.0714299	0.10022	0.09999	0.115648	0.0933603	0.173473	0.12825	0.173473	0.0933603	0.173473	0.0571439	0.115648	0.226732	0.09999	0.226732	0.089279	0.0933603
Moyamoya Disease	DOID:13099	0.0220824	0.0536287	0.0680322	NA	0.0220824	0.125202	0.0280133	NA	0.0367619	0.0571619	0.121084	0.0680322	0.049858	0.089279	NA	0.0680322	0.089279	0.0680322	0.0680322	0.0367619	0.0180216	0.089279	0.0280133	0.089279	0.089279	0.0698989	0.255047	0.0322604	0.0367619	0.089279	0.0600399	0.049858	0.0652346	0.0536287	0.125202	0.0698989	0.121084	0.101627	0.121084	0.0698989	0.121084	0.0367619	0.206874	0.169754	0.0536287	0.169754	0.0437668	0.0698989
Facial Paralysis	DOID:13934	0.0322586	0.0783424	0.171903	NA	0.0322586	0.0934083	0.0384622	NA	0.0476199	0.143909	0.148977	0.171903	0.0613433	0.351665	NA	0.0934083	0.549999	0.171903	0.171903	0.0476199	0.0280133	0.115648	0.0384622	0.115648	0.115648	0.0823791	0.0783424	0.103074	0.0476199	0.115648	0.0822137	0.0613433	0.255351	0.144176	0.0934083	0.0823791	0.148977	0.115769	0.148977	0.0823791	0.148977	0.0476199	0.0934083	0.200064	0.144176	0.368184	0.125202	0.0823791
Dermatitis, Seborrheic	DOID:8741	0.0411723	0.09999	0.115648	NA	0.0411723	0.115648	0.0476199	NA	0.0571439	0.0965077	0.173473	0.115648	0.0714299	0.138778	NA	0.115648	0.138778	0.115648	0.115648	0.0571439	0.0367619	0.138778	0.0476199	0.138778	0.138778	0.0933603	0.09999	0.0767921	0.0571439	0.138778	0.10155	0.0714299	0.10022	0.09999	0.115648	0.0933603	0.173473	0.12825	0.173473	0.0933603	0.825	0.0571439	0.115648	0.689451	0.09999	0.226732	0.089279	0.0933603
Tooth Diseases	DOID:1091	0.0545214	0.132409	0.148977	NA	0.0545214	0.148977	0.0613433	NA	0.0714299	0.12373	0.386968	0.148977	0.0865818	0.173473	NA	0.148977	0.173473	0.148977	0.148977	0.0714299	0.049858	0.173473	0.0613433	0.173473	0.173473	0.109892	0.132409	0.107888	0.0714299	0.173473	0.130357	0.0865818	0.12426	0.132409	0.148977	0.109892	0.21027	0.147106	0.21027	0.109892	0.21027	0.0714299	0.148977	0.266882	0.132409	0.266882	0.121084	0.109892
Hepatolenticular Degeneration	DOID:893	0.041946	0.0884832	0.100712	NA	0.041946	0.100712	0.0470412	NA	0.0545145	0.0870855	0.259082	0.100712	0.0656074	0.118649	NA	0.100712	0.118649	0.100712	0.100712	0.0545145	0.0384438	0.118649	0.0470412	0.118649	0.118649	0.0823681	0.0884832	0.0702365	0.0545145	0.118649	0.09077	0.293225	0.0911105	0.0884832	0.100712	0.0823681	0.145273	0.108385	0.145273	0.368135	0.145273	0.0545145	0.100712	0.185501	0.0884832	0.185501	0.0800775	0.368135
Hypokalemic Periodic Paralysis	DOID:14452	0.0336539	0.110448	0.0776536	NA	0.0336539	0.0776536	0.0388268	NA	0.0464207	0.0668442	0.122834	0.0776536	0.0577075	0.0958257	NA	0.0776536	0.0958257	0.0776536	0.0776536	0.0464207	0.0301005	0.0958257	0.0388268	0.0958257	0.0958257	0.0747945	0.0652751	0.0468218	0.0464207	0.617036	0.0697573	0.257917	0.0730082	0.0652751	0.0776536	0.0747945	0.122834	0.101398	0.122834	0.334286	0.122834	0.0464207	0.0776536	0.163723	0.0652751	0.163723	0.0567718	0.334286
Neoplasms, Germ Cell and Embryonal	DOID:2994	0.243677	0.0545214	0.0613433	NA	0.243677	0.0613433	0.274167	NA	0.173473	0.0509475	0.0865818	0.0613433	0.0865818	0.0714299	NA	0.0613433	0.0714299	0.0613433	0.0613433	0.319248	0.222835	0.0714299	0.274167	0.0714299	0.0714299	0.109892	0.0545214	0.0444246	0.0714299	0.0714299	0.0536764	0.0865818	0.051166	0.0545214	0.0613433	0.109892	0.0865818	0.147106	0.0865818	0.109892	0.0865818	0.0714299	0.0613433	0.109892	0.0545214	0.109892	0.049858	0.109892
Adrenocortical Carcinoma	DOID:3948	0.193613	0.0262177	0.0322586	NA	0.193613	0.0322586	0.238225	NA	0.09999	0.0270641	0.0545214	0.0322586	0.0545214	0.0411723	NA	0.0322586	0.0411723	0.0322586	0.0322586	0.304051	0.163075	0.0411723	0.37258	0.0411723	0.0411723	0.0749632	0.0262177	0.0172584	0.0411723	0.0411723	0.0284379	0.0545214	0.0300073	0.0262177	0.0322586	0.0749632	0.0545214	0.10736	0.0545214	0.0749632	0.0545214	0.0411723	0.0322586	0.0749632	0.0262177	0.0749632	0.0220824	0.0749632
Anxiety Disorders	DOID:2030	0.0749632	0.0749632	0.0823791	NA	0.0749632	0.0823791	0.0823791	NA	0.0933603	0.0679241	0.109892	0.0823791	0.491152	0.0933603	NA	0.0823791	0.0933603	0.0823791	0.0823791	0.0933603	0.0698989	0.0933603	0.0823791	0.0933603	0.0933603	0.135413	0.0749632	0.0640035	0.0933603	0.0933603	0.0716984	0.109892	0.066053	0.0749632	0.0823791	0.135413	0.109892	0.176371	0.109892	0.135413	0.109892	0.0933603	0.0823791	0.135413	0.0749632	0.135413	0.0698989	0.135413
Sphingolipidoses	DOID:1927	0.0411723	0.0411723	0.0476199	NA	0.0411723	0.0476199	0.0476199	NA	0.0571439	0.0397384	0.0714299	0.0476199	0.0714299	0.0571439	NA	0.0476199	0.0571439	0.0476199	0.0476199	0.0571439	0.0367619	0.0571439	0.0476199	0.0571439	0.0571439	0.0933603	0.0411723	0.0316203	0.0571439	0.0571439	0.0418146	0.319248	0.0412673	0.0411723	0.0476199	0.0933603	0.0714299	0.12825	0.0714299	0.417263	0.0714299	0.0571439	0.0476199	0.0933603	0.0411723	0.0933603	0.0367619	0.417263
Carcinoma, Hepatocellular	DOID:684	NA	NA	NA	NA	NA	NA	NA	NA	NA	NA	NA	NA	NA	NA	NA	NA	NA	NA	NA	NA	NA	NA	NA	NA	NA	NA	NA	NA	NA	NA	NA	NA	NA	NA	NA	NA	NA	NA	NA	NA	NA	NA	NA	NA	NA	NA	NA	NA
Vestibular Diseases	DOID:3426	0.0262177	0.0636715	0.144176	NA	0.0262177	0.0783424	0.0322586	NA	0.0411723	0.199864	0.132409	0.238225	0.0545214	0.184015	NA	0.0783424	0.184015	0.144176	0.238225	0.0411723	0.0220824	0.09999	0.0322586	0.09999	0.09999	0.0749632	0.0636715	0.12745	0.0411723	0.09999	0.0690634	0.0545214	0.134114	0.193613	0.0783424	0.0749632	0.132409	0.10736	0.132409	0.0749632	0.132409	0.0411723	0.0783424	0.182054	0.193613	0.33504	0.0986948	0.0749632
Cleft Lip	DOID:9296	0.0749632	0.0749632	0.0823791	NA	0.0749632	0.0823791	0.0823791	NA	0.0933603	0.0679241	0.109892	0.0823791	0.109892	0.0933603	NA	0.0823791	0.0933603	0.0823791	0.0823791	0.0933603	0.0698989	0.0933603	0.0823791	0.0933603	0.0933603	0.135413	0.0749632	0.0640035	0.0933603	0.0933603	0.0716984	0.109892	0.066053	0.0749632	0.0823791	0.135413	0.109892	0.176371	0.109892	0.135413	0.109892	0.0933603	0.0823791	0.135413	0.0749632	0.135413	0.0698989	0.135413
Epilepsy, Absence	DOID:1825	0.0220824	0.0536287	0.206874	NA	0.0220824	0.0680322	0.0280133	NA	0.0367619	0.105197	0.121084	0.125202	0.049858	0.164303	NA	0.0680322	0.164303	0.323547	0.125202	0.0367619	0.0180216	0.089279	0.0280133	0.089279	0.089279	0.0698989	0.0536287	0.0593699	0.0367619	0.089279	0.0600399	0.049858	0.168627	0.0986948	0.0680322	0.0698989	0.121084	0.101627	0.121084	0.0698989	0.121084	0.0367619	0.0680322	0.169754	0.0986948	0.312405	0.468554	0.0698989
Tetralogy of Fallot	DOID:6419	0.0411723	0.09999	0.115648	NA	0.0411723	0.351665	0.0476199	NA	0.0571439	0.0965077	0.173473	0.115648	0.0714299	0.138778	NA	0.115648	0.138778	0.115648	0.115648	0.0571439	0.0367619	0.138778	0.0476199	0.138778	0.138778	0.0933603	0.184015	0.0767921	0.0571439	0.138778	0.10155	0.0714299	0.10022	0.09999	0.351665	0.0933603	0.173473	0.12825	0.173473	0.0933603	0.173473	0.0571439	0.212832	0.226732	0.09999	0.226732	0.089279	0.0933603
Dermatitis, Allergic Contact	DOID:3042	0.0322586	0.0783424	0.0934083	NA	0.0322586	0.0934083	0.0384622	NA	0.0476199	0.0781974	0.148977	0.0934083	0.0613433	0.115648	NA	0.0934083	0.115648	0.0934083	0.0934083	0.0476199	0.0280133	0.115648	0.0384622	0.115648	0.115648	0.0823791	0.0783424	0.056008	0.0476199	0.115648	0.0822137	0.0613433	0.0839745	0.0783424	0.0934083	0.0823791	0.148977	0.115769	0.148977	0.0823791	0.708501	0.0476199	0.0934083	0.608356	0.0783424	0.200064	0.0680322	0.0823791
Mental Retardation, X-Linked	DOID:0060309	0.0322586	0.0322586	0.0384622	NA	0.0322586	0.0384622	0.0384622	NA	0.0476199	0.0321989	0.0613433	0.0384622	0.148977	0.0476199	NA	0.0384622	0.0476199	0.0384622	0.0384622	0.0476199	0.0280133	0.0476199	0.0384622	0.0476199	0.0476199	0.0823791	0.0322586	0.0230621	0.0476199	0.0476199	0.0338527	0.0613433	0.0345777	0.0322586	0.0384622	0.0823791	0.0613433	0.115769	0.0613433	0.0823791	0.0613433	0.0476199	0.0384622	0.0823791	0.0322586	0.0823791	0.0280133	0.0823791
Distal Myopathies	DOID:11720	0.0262177	0.117177	0.0783424	NA	0.0262177	0.0783424	0.0322586	NA	0.0411723	0.065727	0.132409	0.0783424	0.0545214	0.09999	NA	0.0783424	0.09999	0.0783424	0.0783424	0.0411723	0.0220824	0.09999	0.0322586	0.09999	0.09999	0.0749632	0.0636715	0.0419131	0.0411723	0.720502	0.0690634	0.0545214	0.0728749	0.0636715	0.0783424	0.0749632	0.132409	0.10736	0.132409	0.0749632	0.132409	0.0411723	0.0783424	0.182054	0.0636715	0.182054	0.0536287	0.0749632
Holoprosencephaly	DOID:4621	0.0749632	0.0749632	0.0823791	NA	0.0749632	0.0823791	0.0823791	NA	0.0933603	0.0679241	0.109892	0.0823791	0.109892	0.0933603	NA	0.0823791	0.0933603	0.0823791	0.0823791	0.0933603	0.0698989	0.0933603	0.0823791	0.0933603	0.0933603	0.135413	0.0749632	0.0640035	0.0933603	0.0933603	0.0716984	0.109892	0.066053	0.0749632	0.0823791	0.135413	0.109892	0.176371	0.109892	0.135413	0.109892	0.0933603	0.0823791	0.135413	0.0749632	0.135413	0.0698989	0.135413
Obesity	DOID:9970	0.0411723	0.0411723	0.0476199	NA	0.0411723	0.0476199	0.0476199	NA	0.0571439	0.0397384	0.0714299	0.0476199	0.0714299	0.0571439	NA	0.0476199	0.0571439	0.0476199	0.0476199	0.0571439	0.0367619	0.0571439	0.0476199	0.0571439	0.0571439	0.0933603	0.0411723	0.0316203	0.0571439	0.0571439	0.0418146	0.173473	0.0412673	0.0411723	0.0476199	0.0933603	0.0714299	0.12825	0.0714299	0.226732	0.0714299	0.0571439	0.0476199	0.0933603	0.0411723	0.0933603	0.0367619	0.226732
Sarcoma, Kaposi	DOID:8632	0.564516	0.0322586	0.0384622	NA	0.564516	0.0384622	0.284037	NA	0.115648	0.0321989	0.0613433	0.0384622	0.0613433	0.0476199	NA	0.0384622	0.0476199	0.0384622	0.0384622	0.351665	0.206874	0.0476199	0.284037	0.0476199	0.0476199	0.0823791	0.0322586	0.0230621	0.0476199	0.0476199	0.0338527	0.0613433	0.0345777	0.0322586	0.0384622	0.0823791	0.0613433	0.115769	0.0613433	0.0823791	0.0613433	0.0476199	0.0384622	0.0823791	0.0322586	0.0823791	0.0280133	0.0823791
Clubfoot	DOID:11836	0.0322586	0.37258	0.0934083	NA	0.0322586	0.0934083	0.0384622	NA	0.0476199	0.0781974	0.148977	0.0934083	0.0613433	0.115648	NA	0.0934083	0.115648	0.0934083	0.0934083	0.0476199	0.0280133	0.115648	0.0384622	0.115648	0.115648	0.0823791	0.0783424	0.056008	0.0476199	0.212832	0.0822137	0.0613433	0.0839745	0.0783424	0.0934083	0.0823791	0.148977	0.115769	0.148977	0.0823791	0.148977	0.0476199	0.0934083	0.200064	0.0783424	0.200064	0.0680322	0.0823791
Osteosarcoma	DOID:3347	0.458801	0.0262177	0.0322586	NA	0.458801	0.0322586	0.238225	NA	0.09999	0.0270641	0.0545214	0.0322586	0.0545214	0.0411723	NA	0.0322586	0.0411723	0.0322586	0.0322586	0.304051	0.163075	0.0411723	0.238225	0.0411723	0.0411723	0.0749632	0.0262177	0.0172584	0.0411723	0.0411723	0.0284379	0.0545214	0.0300073	0.0262177	0.0322586	0.0749632	0.0545214	0.10736	0.0545214	0.0749632	0.0545214	0.0411723	0.0322586	0.0749632	0.0262177	0.0749632	0.0220824	0.0749632
Intestinal Neoplasms	DOID:4610	0.09999	0.0411723	0.0476199	NA	0.09999	0.0476199	0.115648	NA	0.421999	0.0397384	0.0714299	0.0476199	0.0714299	0.0571439	NA	0.0476199	0.0571439	0.0476199	0.0476199	0.138778	0.089279	0.0571439	0.115648	0.0571439	0.0571439	0.0933603	0.0411723	0.0316203	0.0571439	0.0571439	0.0418146	0.0714299	0.0412673	0.0411723	0.0476199	0.0933603	0.0714299	0.12825	0.0714299	0.0933603	0.0714299	0.0571439	0.0476199	0.0933603	0.0411723	0.0933603	0.0367619	0.0933603
Nephrotic Syndrome	DOID:1184	0.0411723	0.09999	0.115648	NA	0.0411723	0.115648	0.0476199	NA	0.0571439	0.0965077	0.173473	0.115648	0.0714299	0.138778	NA	0.115648	0.138778	0.115648	0.115648	0.0571439	0.0367619	0.138778	0.0476199	0.138778	0.138778	0.0933603	0.09999	0.0767921	0.0571439	0.138778	0.10155	0.0714299	0.10022	0.09999	0.115648	0.0933603	0.173473	0.12825	0.173473	0.0933603	0.173473	0.0571439	0.115648	0.226732	0.09999	0.226732	0.089279	0.0933603
Gallbladder Diseases	DOID:0060262	0.0749632	0.182054	0.200064	NA	0.0749632	0.200064	0.0823791	NA	0.0933603	0.164959	0.491152	0.200064	0.109892	0.226732	NA	0.200064	0.226732	0.200064	0.200064	0.0933603	0.0698989	0.226732	0.0823791	0.226732	0.226732	0.135413	0.182054	0.155437	0.0933603	0.226732	0.174125	0.109892	0.160414	0.182054	0.200064	0.135413	0.266882	0.176371	0.266882	0.135413	0.266882	0.0933603	0.200064	0.328859	0.182054	0.328859	0.169754	0.135413
Factor V Deficiency	DOID:2216	0.0322586	0.0783424	0.0934083	NA	0.0322586	0.0934083	0.0384622	NA	0.0476199	0.0781974	0.148977	0.0934083	0.0613433	0.115648	NA	0.0934083	0.115648	0.0934083	0.0934083	0.0476199	0.0280133	0.115648	0.0384622	0.115648	0.115648	0.0823791	0.0783424	0.056008	0.0476199	0.115648	0.249997	0.0613433	0.0839745	0.0783424	0.0934083	0.0823791	0.148977	0.115769	0.148977	0.0823791	0.148977	0.0476199	0.0934083	0.200064	0.0783424	0.200064	0.0680322	0.0823791
Metabolic Diseases	DOID:0014667	0.161604	0.161604	0.171818	NA	0.161604	0.171818	0.171818	NA	0.187037	0.137447	0.210167	0.171818	0.210167	0.187037	NA	0.171818	0.187037	0.171818	0.171818	0.187037	0.154659	0.187037	0.171818	0.187037	0.187037	0.246397	0.161604	0.146605	0.187037	0.187037	0.146222	0.510407	0.125729	0.161604	0.171818	0.246397	0.210167	0.305913	0.210167	0.598394	0.210167	0.187037	0.171818	0.246397	0.161604	0.246397	0.154659	0.598394
Bronchiectasis	DOID:9563	0.0411723	0.09999	0.115648	NA	0.0411723	0.115648	0.0476199	NA	0.0571439	0.0965077	0.173473	0.115648	0.0714299	0.138778	NA	0.351665	0.138778	0.115648	0.115648	0.0571439	0.0367619	0.138778	0.0476199	0.421999	0.138778	0.0933603	0.09999	0.0767921	0.0571439	0.138778	0.10155	0.0714299	0.10022	0.09999	0.115648	0.0933603	0.173473	0.12825	0.173473	0.0933603	0.173473	0.0571439	0.115648	0.226732	0.09999	0.226732	0.089279	0.0933603
Breast Neoplasms	DOID:1612	0.304051	0.0411723	0.0476199	NA	0.304051	0.0476199	0.351665	NA	0.138778	0.0397384	0.0714299	0.0476199	0.0714299	0.0571439	NA	0.0476199	0.0571439	0.0476199	0.0476199	0.421999	0.271481	0.0571439	0.351665	0.0571439	0.0571439	0.0933603	0.0411723	0.0316203	0.0571439	0.0571439	0.0418146	0.0714299	0.0412673	0.0411723	0.0476199	0.0933603	0.0714299	0.12825	0.0714299	0.0933603	0.0714299	0.0571439	0.0476199	0.0933603	0.0411723	0.0933603	0.0367619	0.0933603
Neurilemmoma	DOID:3192	0.0783424	0.0322586	0.0384622	NA	0.0783424	0.0384622	0.0934083	NA	0.351665	0.0321989	0.0613433	0.0384622	0.0613433	0.0476199	NA	0.0384622	0.0476199	0.0384622	0.0384622	0.115648	0.0680322	0.0476199	0.0934083	0.0476199	0.0476199	0.0823791	0.0322586	0.0230621	0.0476199	0.0476199	0.0338527	0.0613433	0.0345777	0.0322586	0.0384622	0.0823791	0.0613433	0.115769	0.0613433	0.0823791	0.0613433	0.0476199	0.0384622	0.0823791	0.0322586	0.0823791	0.0280133	0.0823791
Supranuclear Palsy, Progressive	DOID:678	0.0322586	0.0783424	0.284037	NA	0.0322586	0.0934083	0.0384622	NA	0.0476199	0.143909	0.148977	0.171903	0.0613433	0.212832	NA	0.0934083	0.212832	0.44423	0.171903	0.0476199	0.0280133	0.115648	0.0384622	0.115648	0.115648	0.0823791	0.0783424	0.103074	0.0476199	0.115648	0.0822137	0.0613433	0.225108	0.144176	0.0934083	0.0823791	0.148977	0.115769	0.148977	0.0823791	0.148977	0.0476199	0.0934083	0.200064	0.144176	0.368184	0.323547	0.0823791
Measles	DOID:8622	0.0749632	0.0749632	0.0823791	NA	0.0749632	0.0823791	0.0823791	NA	0.0933603	0.0679241	0.109892	0.0823791	0.109892	0.0933603	NA	0.0823791	0.0933603	0.0823791	0.0823791	0.0933603	0.0698989	0.0933603	0.0823791	0.0933603	0.0933603	0.135413	0.0749632	0.0640035	0.0933603	0.0933603	0.0716984	0.109892	0.066053	0.0749632	0.0823791	0.605211	0.109892	0.176371	0.109892	0.135413	0.109892	0.0933603	0.0823791	0.135413	0.0749632	0.135413	0.0698989	0.135413
Nephrosis	DOID:2527	0.0545214	0.132409	0.148977	NA	0.0545214	0.148977	0.0613433	NA	0.0714299	0.12373	0.21027	0.148977	0.0865818	0.173473	NA	0.148977	0.173473	0.148977	0.148977	0.0714299	0.049858	0.173473	0.0613433	0.173473	0.173473	0.109892	0.132409	0.107888	0.0714299	0.173473	0.130357	0.0865818	0.12426	0.132409	0.148977	0.109892	0.21027	0.147106	0.21027	0.109892	0.21027	0.0714299	0.148977	0.266882	0.132409	0.266882	0.121084	0.109892
Essential Tremor	DOID:4990	0.0322586	0.0783424	0.284037	NA	0.0322586	0.0934083	0.0384622	NA	0.0476199	0.143909	0.148977	0.171903	0.0613433	0.212832	NA	0.0934083	0.212832	0.44423	0.171903	0.0476199	0.0280133	0.115648	0.0384622	0.115648	0.115648	0.0823791	0.0783424	0.103074	0.0476199	0.115648	0.0822137	0.0613433	0.225108	0.144176	0.0934083	0.0823791	0.148977	0.115769	0.148977	0.0823791	0.148977	0.0476199	0.0934083	0.200064	0.144176	0.368184	0.323547	0.0823791
Fallopian Tube Neoplasms	DOID:1963	0.193613	0.0262177	0.0322586	NA	0.193613	0.0322586	0.238225	NA	0.09999	0.0270641	0.0545214	0.0322586	0.0545214	0.0411723	NA	0.0322586	0.0411723	0.0322586	0.0322586	0.304051	0.163075	0.0411723	0.238225	0.0411723	0.0411723	0.0749632	0.0262177	0.0172584	0.0411723	0.0411723	0.0284379	0.0545214	0.0300073	0.0262177	0.0322586	0.0749632	0.0545214	0.10736	0.0545214	0.0749632	0.0545214	0.0411723	0.0322586	0.0749632	0.0262177	0.0749632	0.0220824	0.0749632
Fetal Alcohol Syndrome	DOID:0050665	0.0630409	0.0630409	0.0691155	NA	0.0630409	0.0691155	0.0691155	NA	0.0780585	0.0586447	0.0914064	0.0691155	0.182813	0.0780585	NA	0.0691155	0.0780585	0.0691155	0.0691155	0.0780585	0.0588762	0.0780585	0.0691155	0.0780585	0.0780585	0.111743	0.0630409	0.0540112	0.0780585	0.0780585	0.0614369	0.0914064	0.0580078	0.0630409	0.0691155	0.111743	0.0914064	0.143717	0.0914064	0.111743	0.0914064	0.0780585	0.0691155	0.111743	0.0630409	0.111743	0.0588762	0.111743
Spinal Muscular Atrophies of Childhood	DOID:0060160	0.0262177	0.0636715	0.37258	NA	0.0262177	0.0783424	0.0322586	NA	0.0411723	0.12096	0.132409	0.144176	0.0545214	0.184015	NA	0.0783424	0.184015	0.238225	0.144176	0.0411723	0.0220824	0.09999	0.0322586	0.09999	0.09999	0.0749632	0.0636715	0.0771343	0.0411723	0.09999	0.0690634	0.0545214	0.273855	0.117177	0.0783424	0.0749632	0.132409	0.10736	0.132409	0.0749632	0.132409	0.0411723	0.0783424	0.182054	0.117177	0.33504	0.163075	0.0749632
Myositis Ossificans	DOID:13374	0.0545214	0.402632	0.148977	NA	0.0545214	0.148977	0.0613433	NA	0.0714299	0.12373	0.21027	0.148977	0.0865818	0.173473	NA	0.148977	0.173473	0.148977	0.148977	0.0714299	0.049858	0.173473	0.0613433	0.173473	0.173473	0.109892	0.132409	0.107888	0.0714299	0.319248	0.130357	0.0865818	0.12426	0.132409	0.148977	0.109892	0.21027	0.147106	0.21027	0.109892	0.21027	0.0714299	0.148977	0.266882	0.132409	0.266882	0.121084	0.109892
Citrullinemia	DOID:9273	0.0411723	0.0411723	0.0476199	NA	0.0411723	0.0476199	0.0476199	NA	0.0571439	0.0397384	0.0714299	0.0476199	0.0714299	0.0571439	NA	0.0476199	0.0571439	0.0476199	0.0476199	0.0571439	0.0367619	0.0571439	0.0476199	0.0571439	0.0571439	0.0933603	0.0411723	0.0316203	0.0571439	0.0571439	0.0418146	0.319248	0.0412673	0.0411723	0.0476199	0.0933603	0.0714299	0.12825	0.0714299	0.417263	0.0714299	0.0571439	0.0476199	0.0933603	0.0411723	0.0933603	0.0367619	0.417263
Photosensitivity Disorders	DOID:3159	0.0411723	0.09999	0.115648	NA	0.0411723	0.115648	0.0476199	NA	0.0571439	0.0965077	0.173473	0.115648	0.0714299	0.138778	NA	0.115648	0.138778	0.115648	0.115648	0.0571439	0.0367619	0.138778	0.0476199	0.138778	0.138778	0.0933603	0.09999	0.0767921	0.0571439	0.138778	0.10155	0.0714299	0.10022	0.09999	0.115648	0.0933603	0.173473	0.12825	0.173473	0.0933603	0.825	0.0571439	0.115648	0.689451	0.09999	0.226732	0.089279	0.0933603
Blood Platelet Disorders	DOID:2218	0.0322586	0.0783424	0.0934083	NA	0.0322586	0.0934083	0.0384622	NA	0.0476199	0.0781974	0.148977	0.0934083	0.0613433	0.115648	NA	0.0934083	0.115648	0.0934083	0.0934083	0.0476199	0.0280133	0.115648	0.0384622	0.115648	0.115648	0.0823791	0.0783424	0.056008	0.0476199	0.115648	0.249997	0.0613433	0.0839745	0.0783424	0.0934083	0.0823791	0.148977	0.115769	0.148977	0.0823791	0.148977	0.0476199	0.0934083	0.200064	0.0783424	0.200064	0.0680322	0.0823791
Influenza, Human	DOID:8469	0.0749632	0.0749632	0.0823791	NA	0.0749632	0.0823791	0.0823791	NA	0.0933603	0.0679241	0.109892	0.0823791	0.109892	0.0933603	NA	0.0823791	0.0933603	0.0823791	0.0823791	0.0933603	0.0698989	0.0933603	0.0823791	0.0933603	0.0933603	0.135413	0.0749632	0.0640035	0.0933603	0.0933603	0.0716984	0.109892	0.066053	0.0749632	0.0823791	0.605211	0.109892	0.176371	0.109892	0.135413	0.109892	0.0933603	0.0823791	0.135413	0.0749632	0.135413	0.0698989	0.135413
Prostatic Neoplasms	DOID:10283	0.238225	0.0322586	0.0384622	NA	0.238225	0.0384622	0.284037	NA	0.115648	0.0321989	0.0613433	0.0384622	0.0613433	0.0476199	NA	0.0384622	0.0476199	0.0384622	0.0384622	0.351665	0.206874	0.0476199	0.284037	0.0476199	0.0476199	0.0823791	0.0322586	0.0230621	0.0476199	0.0476199	0.0338527	0.0613433	0.0345777	0.0322586	0.0384622	0.0823791	0.0613433	0.115769	0.0613433	0.0823791	0.0613433	0.0476199	0.0384622	0.0823791	0.0322586	0.0823791	0.0280133	0.0823791
Amino Acid Metabolism, Inborn Errors	DOID:9252	0.0749632	0.0749632	0.0823791	NA	0.0749632	0.0823791	0.0823791	NA	0.0933603	0.0679241	0.109892	0.0823791	0.109892	0.0933603	NA	0.0823791	0.0933603	0.0823791	0.0823791	0.0933603	0.0698989	0.0933603	0.0823791	0.0933603	0.0933603	0.135413	0.0749632	0.0640035	0.0933603	0.0933603	0.0716984	0.491152	0.066053	0.0749632	0.0823791	0.135413	0.109892	0.176371	0.109892	0.605211	0.109892	0.0933603	0.0823791	0.135413	0.0749632	0.135413	0.0698989	0.605211
Pigmentation Disorders	DOID:3156	0.0545214	0.132409	0.148977	NA	0.0545214	0.148977	0.0613433	NA	0.0714299	0.12373	0.21027	0.148977	0.0865818	0.173473	NA	0.148977	0.173473	0.148977	0.148977	0.0714299	0.049858	0.173473	0.0613433	0.173473	0.173473	0.109892	0.132409	0.107888	0.0714299	0.173473	0.130357	0.0865818	0.12426	0.132409	0.148977	0.109892	0.21027	0.147106	0.21027	0.109892	0.639393	0.0714299	0.148977	0.811538	0.132409	0.266882	0.121084	0.109892
Paralyses, Familial Periodic	DOID:1029	0.0410485	0.129381	0.0892681	NA	0.0410485	0.0892681	0.046024	NA	0.0533176	0.0774163	0.132392	0.0892681	0.0641347	0.106635	NA	0.0892681	0.106635	0.0892681	0.0892681	0.0533176	0.0376273	0.106635	0.046024	0.106635	0.106635	0.0804579	0.0774206	0.0597331	0.0533176	0.669124	0.0806277	0.286643	0.0823045	0.0774206	0.0892681	0.0804579	0.132392	0.105746	0.132392	0.359597	0.132392	0.0533176	0.0892681	0.17126	0.0774206	0.17126	0.0692741	0.359597
Anemia, Dyserythropoietic, Congenital	DOID:1338	0.0220824	0.0536287	0.0680322	NA	0.0220824	0.0680322	0.0280133	NA	0.0367619	0.0571619	0.121084	0.0680322	0.049858	0.089279	NA	0.0680322	0.089279	0.0680322	0.0680322	0.0367619	0.0180216	0.089279	0.0280133	0.089279	0.089279	0.0698989	0.0536287	0.0322604	0.0367619	0.089279	0.18257	0.049858	0.0652346	0.0536287	0.0680322	0.0698989	0.121084	0.101627	0.121084	0.0698989	0.121084	0.0367619	0.0680322	0.169754	0.0536287	0.169754	0.0437668	0.0698989
Pituitary ACTH Hypersecretion	DOID:3946	0.0411723	0.09999	0.115648	NA	0.0411723	0.115648	0.0476199	NA	0.0571439	0.0965077	0.173473	0.115648	0.0714299	0.138778	NA	0.115648	0.138778	0.115648	0.115648	0.0571439	0.0367619	0.255398	0.0476199	0.138778	0.255398	0.0933603	0.09999	0.0767921	0.0571439	0.138778	0.10155	0.0714299	0.10022	0.09999	0.115648	0.0933603	0.319248	0.12825	0.319248	0.0933603	0.173473	0.0571439	0.115648	0.226732	0.09999	0.226732	0.089279	0.0933603
Osteopetrosis	DOID:13533	0.0262177	0.302808	0.0783424	NA	0.0262177	0.0783424	0.0322586	NA	0.0411723	0.065727	0.132409	0.0783424	0.0545214	0.09999	NA	0.0783424	0.09999	0.0783424	0.0783424	0.0411723	0.0220824	0.09999	0.0322586	0.09999	0.09999	0.0749632	0.0636715	0.0419131	0.0411723	0.184015	0.0690634	0.0545214	0.0728749	0.0636715	0.0783424	0.0749632	0.132409	0.10736	0.132409	0.0749632	0.132409	0.0411723	0.0783424	0.182054	0.0636715	0.182054	0.0536287	0.0749632
Hyperparathyroidism, Primary	DOID:11202	0.0411723	0.09999	0.115648	NA	0.0411723	0.115648	0.0476199	NA	0.0571439	0.0965077	0.173473	0.115648	0.0714299	0.138778	NA	0.115648	0.138778	0.115648	0.115648	0.0571439	0.0367619	0.255398	0.0476199	0.138778	0.255398	0.0933603	0.09999	0.0767921	0.0571439	0.138778	0.10155	0.0714299	0.10022	0.09999	0.115648	0.0933603	0.825	0.12825	0.319248	0.0933603	0.173473	0.0571439	0.115648	0.226732	0.09999	0.226732	0.089279	0.0933603
Lung Diseases, Interstitial	DOID:3082	0.0411723	0.09999	0.115648	NA	0.0411723	0.115648	0.0476199	NA	0.0571439	0.0965077	0.173473	0.115648	0.0714299	0.138778	NA	0.549999	0.138778	0.115648	0.115648	0.0571439	0.0367619	0.138778	0.0476199	0.659999	0.138778	0.0933603	0.09999	0.0767921	0.0571439	0.138778	0.10155	0.0714299	0.10022	0.09999	0.115648	0.0933603	0.173473	0.12825	0.173473	0.0933603	0.173473	0.0571439	0.115648	0.226732	0.09999	0.226732	0.089279	0.0933603
Urinary Bladder Diseases	DOID:365	0.0749632	0.182054	0.200064	NA	0.0749632	0.200064	0.0823791	NA	0.0933603	0.164959	0.266882	0.200064	0.109892	0.226732	NA	0.200064	0.226732	0.200064	0.200064	0.0933603	0.0698989	0.226732	0.0823791	0.226732	0.226732	0.135413	0.182054	0.155437	0.0933603	0.226732	0.174125	0.109892	0.160414	0.182054	0.200064	0.135413	0.266882	0.176371	0.266882	0.135413	0.266882	0.0933603	0.200064	0.328859	0.182054	0.328859	0.169754	0.135413
Hereditary Sensory and Motor Neuropathy	DOID:2477	0.0411723	0.09999	0.212832	NA	0.0411723	0.115648	0.0476199	NA	0.0571439	0.177607	0.173473	0.212832	0.0714299	0.421999	NA	0.115648	0.421999	0.212832	0.212832	0.0571439	0.0367619	0.138778	0.0476199	0.138778	0.138778	0.0933603	0.09999	0.141323	0.0571439	0.138778	0.10155	0.0714299	0.304752	0.184015	0.115648	0.0933603	0.173473	0.12825	0.173473	0.0933603	0.173473	0.0571439	0.115648	0.226732	0.184015	0.417263	0.164303	0.0933603
Myotonia Congenita	DOID:2106	0.0307603	0.109799	0.409488	NA	0.0307603	0.0861032	0.0354543	NA	0.0423288	0.138071	0.127526	0.158459	0.0525107	0.189184	NA	0.0861032	0.189184	0.261824	0.158459	0.0423288	0.0275306	0.102799	0.0354543	0.102799	0.102799	0.0678443	0.0747035	0.10613	0.0423288	0.531177	0.0780369	0.0525107	0.320988	0.13748	0.0861032	0.0678443	0.127526	0.0915259	0.127526	0.0678443	0.127526	0.0423288	0.0861032	0.164765	0.13748	0.303222	0.203309	0.0678443
Osteomalacia	DOID:10573	0.0322586	0.37258	0.0934083	NA	0.0322586	0.0934083	0.0384622	NA	0.0476199	0.0781974	0.148977	0.0934083	0.0613433	0.115648	NA	0.0934083	0.115648	0.0934083	0.0934083	0.0476199	0.0280133	0.115648	0.0384622	0.115648	0.115648	0.0823791	0.0783424	0.056008	0.0476199	0.212832	0.0822137	0.0613433	0.0839745	0.0783424	0.0934083	0.0823791	0.148977	0.115769	0.148977	0.0823791	0.148977	0.0476199	0.0934083	0.200064	0.0783424	0.200064	0.0680322	0.0823791
Lymphoma, Non-Hodgkin	DOID:8538	0.238225	0.0322586	0.0384622	NA	0.238225	0.0384622	0.284037	NA	0.115648	0.0321989	0.0613433	0.0384622	0.0613433	0.0476199	NA	0.0384622	0.0476199	0.0384622	0.0384622	0.351665	0.323547	0.0476199	0.284037	0.0476199	0.0476199	0.0823791	0.0322586	0.0230621	0.0476199	0.0476199	0.0338527	0.0613433	0.0345777	0.0322586	0.0384622	0.0823791	0.0613433	0.115769	0.0613433	0.0823791	0.0613433	0.0476199	0.0384622	0.0823791	0.0322586	0.0823791	0.0280133	0.0823791
Leukopenia	DOID:615	0.0411723	0.09999	0.115648	NA	0.0411723	0.115648	0.0476199	NA	0.0571439	0.0965077	0.173473	0.115648	0.0714299	0.138778	NA	0.115648	0.138778	0.115648	0.115648	0.0571439	0.0367619	0.138778	0.0476199	0.138778	0.138778	0.0933603	0.09999	0.0767921	0.0571439	0.138778	0.308794	0.0714299	0.10022	0.09999	0.115648	0.0933603	0.173473	0.12825	0.173473	0.0933603	0.173473	0.0571439	0.115648	0.226732	0.09999	0.226732	0.089279	0.0933603
Leukemia, Monocytic, Acute	DOID:8864	0.142026	0.0192322	0.0250878	NA	0.142026	0.0250878	0.185269	NA	0.0819002	0.0211008	0.0466468	0.0250878	0.0466468	0.0337236	NA	0.0250878	0.0337236	0.0250878	0.0250878	0.249044	0.580615	0.0337236	0.185269	0.0337236	0.0337236	0.0664141	0.0192322	0.0105433	0.0337236	0.0337236	0.0221572	0.0466468	0.0246847	0.0192322	0.0250878	0.0664141	0.0466468	0.0976859	0.0466468	0.0664141	0.0466468	0.0337236	0.0250878	0.0664141	0.0192322	0.0664141	0.0152224	0.0664141
Pyruvate Carboxylase Deficiency Disease	DOID:3651	0.0545214	0.0545214	0.0613433	NA	0.0545214	0.0613433	0.0613433	NA	0.0714299	0.0509475	0.0865818	0.0613433	0.0865818	0.0714299	NA	0.0613433	0.0714299	0.0613433	0.0613433	0.0714299	0.049858	0.0714299	0.0613433	0.0714299	0.0714299	0.109892	0.0545214	0.0444246	0.0714299	0.0714299	0.0536764	0.386968	0.051166	0.0545214	0.0613433	0.109892	0.0865818	0.147106	0.0865818	0.491152	0.0865818	0.0714299	0.0613433	0.109892	0.0545214	0.109892	0.049858	0.491152
Osteoarthritis	DOID:8398	0.0262177	0.458801	0.0783424	NA	0.0262177	0.0783424	0.0322586	NA	0.0411723	0.065727	0.132409	0.0783424	0.0545214	0.09999	NA	0.0783424	0.09999	0.0783424	0.0783424	0.0411723	0.0220824	0.09999	0.0322586	0.09999	0.09999	0.0749632	0.0636715	0.0419131	0.0411723	0.184015	0.0690634	0.0545214	0.0728749	0.0636715	0.0783424	0.0749632	0.132409	0.10736	0.132409	0.0749632	0.132409	0.0411723	0.0783424	0.182054	0.0636715	0.182054	0.0536287	0.0749632
Keratoderma, Palmoplantar	DOID:3390	0.0411723	0.09999	0.115648	NA	0.0411723	0.115648	0.0476199	NA	0.0571439	0.0965077	0.173473	0.115648	0.0714299	0.138778	NA	0.115648	0.138778	0.115648	0.115648	0.0571439	0.0367619	0.138778	0.0476199	0.138778	0.138778	0.0933603	0.09999	0.0767921	0.0571439	0.138778	0.10155	0.0714299	0.10022	0.09999	0.115648	0.0933603	0.173473	0.12825	0.173473	0.0933603	0.527499	0.0571439	0.115648	0.689451	0.09999	0.226732	0.089279	0.0933603
Carcinoma, Large Cell	DOID:4552	0.184015	0.0411723	0.0476199	NA	0.184015	0.0476199	0.212832	NA	0.138778	0.0397384	0.0714299	0.0476199	0.0714299	0.0571439	NA	0.0476199	0.0571439	0.0476199	0.0476199	0.255398	0.164303	0.0571439	0.212832	0.0571439	0.0571439	0.0933603	0.0411723	0.0316203	0.0571439	0.0571439	0.0418146	0.0714299	0.0412673	0.0411723	0.0476199	0.0933603	0.0714299	0.12825	0.0714299	0.0933603	0.0714299	0.0571439	0.0476199	0.0933603	0.0411723	0.0933603	0.0367619	0.0933603
Neurofibromatoses	DOID:8712	0.0411723	0.0411723	0.0476199	NA	0.0411723	0.0476199	0.0476199	NA	0.0571439	0.0397384	0.0714299	0.0476199	0.0714299	0.0571439	NA	0.0476199	0.0571439	0.0476199	0.0476199	0.0571439	0.0367619	0.0571439	0.0476199	0.0571439	0.0571439	0.417263	0.0411723	0.0316203	0.659999	0.0571439	0.0418146	0.0714299	0.0412673	0.0411723	0.0476199	0.0933603	0.0714299	0.12825	0.0714299	0.0933603	0.0714299	0.421999	0.0476199	0.0933603	0.0411723	0.0933603	0.0367619	0.0933603
Lacrimal Apparatus Diseases	DOID:13757	0.0262177	0.0636715	0.144176	NA	0.0262177	0.0783424	0.0322586	NA	0.0411723	0.445196	0.132409	0.564516	0.0545214	0.184015	NA	0.0783424	0.184015	0.144176	0.564516	0.0411723	0.0220824	0.09999	0.0322586	0.09999	0.09999	0.0749632	0.0636715	0.302016	0.0411723	0.09999	0.0690634	0.0545214	0.134114	0.458801	0.0783424	0.0749632	0.132409	0.10736	0.132409	0.0749632	0.132409	0.0411723	0.0783424	0.182054	0.302808	0.33504	0.0986948	0.0749632
Substance-Related Disorders	DOID:302	0.0749632	0.0749632	0.0823791	NA	0.0749632	0.0823791	0.0823791	NA	0.0933603	0.0679241	0.109892	0.0823791	0.266882	0.0933603	NA	0.0823791	0.0933603	0.0823791	0.0823791	0.0933603	0.0698989	0.0933603	0.0823791	0.0933603	0.0933603	0.135413	0.0749632	0.0640035	0.0933603	0.0933603	0.0716984	0.109892	0.066053	0.0749632	0.0823791	0.135413	0.109892	0.176371	0.109892	0.135413	0.109892	0.0933603	0.0823791	0.135413	0.0749632	0.135413	0.0698989	0.135413
Tic Disorders	DOID:10600	0.0411723	0.0411723	0.0476199	NA	0.0411723	0.0476199	0.0476199	NA	0.0571439	0.0397384	0.0714299	0.0476199	0.173473	0.0571439	NA	0.0476199	0.0571439	0.0476199	0.0476199	0.0571439	0.0367619	0.0571439	0.0476199	0.0571439	0.0571439	0.0933603	0.0411723	0.0316203	0.0571439	0.0571439	0.0418146	0.0714299	0.0412673	0.0411723	0.0476199	0.0933603	0.0714299	0.12825	0.0714299	0.0933603	0.0714299	0.0571439	0.0476199	0.0933603	0.0411723	0.0933603	0.0367619	0.0933603
Myopia, Degenerative	DOID:11829	0.0220424	0.0535316	0.12096	NA	0.0220424	0.065727	0.0270641	NA	0.0344352	0.383449	0.11023	0.675236	0.0453888	0.153904	NA	0.065727	0.153904	0.12096	0.473612	0.0344352	0.0185926	0.0836282	0.0270641	0.0836282	0.0836282	0.0619673	0.0535316	0.254718	0.0344352	0.0836282	0.0590688	0.0453888	0.117377	0.385735	0.065727	0.0619673	0.11023	0.0877686	0.11023	0.0619673	0.11023	0.0344352	0.065727	0.150492	0.254585	0.276956	0.0830976	0.0619673
Mental Retardation	DOID:1059	0.0545214	0.0545214	0.0613433	NA	0.0545214	0.0613433	0.0613433	NA	0.0714299	0.0509475	0.0865818	0.0613433	0.21027	0.0714299	NA	0.0613433	0.0714299	0.0613433	0.0613433	0.0714299	0.049858	0.0714299	0.0613433	0.0714299	0.0714299	0.109892	0.0545214	0.0444246	0.0714299	0.0714299	0.0536764	0.0865818	0.051166	0.0545214	0.0613433	0.109892	0.0865818	0.147106	0.0865818	0.109892	0.0865818	0.0714299	0.0613433	0.109892	0.0545214	0.109892	0.049858	0.109892
Leukodystrophy, Metachromatic	DOID:10581	0.0322586	0.0322586	0.0384622	NA	0.0322586	0.0384622	0.0384622	NA	0.0476199	0.0321989	0.0613433	0.0384622	0.0613433	0.0476199	NA	0.0384622	0.0476199	0.0384622	0.0384622	0.0476199	0.0280133	0.0476199	0.0384622	0.0476199	0.0476199	0.0823791	0.0322586	0.0230621	0.0476199	0.0476199	0.0338527	0.274167	0.0345777	0.0322586	0.0384622	0.0823791	0.0613433	0.115769	0.0613433	0.368184	0.0613433	0.0476199	0.0384622	0.0823791	0.0322586	0.0823791	0.0280133	0.368184
Optic Atrophy	DOID:5723	0.0322586	0.0783424	0.171903	NA	0.0322586	0.0934083	0.0384622	NA	0.0476199	0.143909	0.148977	0.171903	0.0613433	0.351665	NA	0.0934083	0.549999	0.171903	0.171903	0.0476199	0.0280133	0.115648	0.0384622	0.115648	0.115648	0.0823791	0.0783424	0.103074	0.0476199	0.115648	0.0822137	0.0613433	0.255351	0.144176	0.0934083	0.0823791	0.148977	0.115769	0.148977	0.0823791	0.148977	0.0476199	0.0934083	0.200064	0.144176	0.368184	0.125202	0.0823791
Vasospasm, Intracranial	DOID:13100	0.0322586	0.0783424	0.0934083	NA	0.0322586	0.171903	0.0384622	NA	0.0476199	0.0781974	0.148977	0.0934083	0.0613433	0.115648	NA	0.0934083	0.115648	0.0934083	0.0934083	0.0476199	0.0280133	0.115648	0.0384622	0.115648	0.115648	0.0823791	0.37258	0.056008	0.0476199	0.115648	0.0822137	0.0613433	0.0839745	0.0783424	0.171903	0.0823791	0.148977	0.115769	0.148977	0.0823791	0.148977	0.0476199	0.284037	0.200064	0.0783424	0.200064	0.0680322	0.0823791
Carotid Stenosis	DOID:13001	0.0262177	0.0636715	0.0783424	NA	0.0262177	0.144176	0.0322586	NA	0.0411723	0.065727	0.132409	0.0783424	0.0545214	0.09999	NA	0.0783424	0.09999	0.0783424	0.0783424	0.0411723	0.0220824	0.09999	0.0322586	0.09999	0.09999	0.0749632	0.302808	0.0419131	0.0411723	0.09999	0.0690634	0.0545214	0.0728749	0.0636715	0.144176	0.0749632	0.132409	0.10736	0.132409	0.0749632	0.132409	0.0411723	0.238225	0.182054	0.0636715	0.182054	0.0536287	0.0749632
Sudden Infant Death	DOID:9007	0.10736	0.10736	0.115769	NA	0.10736	0.115769	0.115769	NA	0.12825	0.0943727	0.147106	0.115769	0.147106	0.12825	NA	0.115769	0.12825	0.115769	0.115769	0.12825	0.101627	0.12825	0.115769	0.12825	0.12825	0.176371	0.10736	0.094962	0.12825	0.12825	0.0999124	0.147106	0.0889973	0.10736	0.115769	0.176371	0.147106	0.543379	0.147106	0.176371	0.147106	0.12825	0.115769	0.176371	0.10736	0.176371	0.101627	0.176371
Gastrointestinal Stromal Tumors	DOID:9253	0.304051	0.0411723	0.0476199	NA	0.304051	0.0476199	0.549999	NA	0.138778	0.0397384	0.0714299	0.0476199	0.0714299	0.0571439	NA	0.0476199	0.0571439	0.0476199	0.0476199	0.659999	0.271481	0.0571439	0.351665	0.0571439	0.0571439	0.0933603	0.0411723	0.0316203	0.0571439	0.0571439	0.0418146	0.0714299	0.0412673	0.0411723	0.0476199	0.0933603	0.0714299	0.12825	0.0714299	0.0933603	0.0714299	0.0571439	0.0476199	0.0933603	0.0411723	0.0933603	0.0367619	0.0933603
Glycogen Storage Disease Type III	DOID:2748	0.0322586	0.0322586	0.0384622	NA	0.0322586	0.0384622	0.0384622	NA	0.0476199	0.0321989	0.0613433	0.0384622	0.0613433	0.0476199	NA	0.0384622	0.0476199	0.0384622	0.0384622	0.0476199	0.0280133	0.0476199	0.0384622	0.0476199	0.0476199	0.0823791	0.0322586	0.0230621	0.0476199	0.0476199	0.0338527	0.274167	0.0345777	0.0322586	0.0384622	0.0823791	0.0613433	0.115769	0.0613433	0.368184	0.0613433	0.0476199	0.0384622	0.0823791	0.0322586	0.0823791	0.0280133	0.368184
Osteochondritis Dissecans	DOID:84	0.0322586	0.37258	0.0934083	NA	0.0322586	0.0934083	0.0384622	NA	0.0476199	0.0781974	0.148977	0.0934083	0.0613433	0.115648	NA	0.0934083	0.115648	0.0934083	0.0934083	0.0476199	0.0280133	0.115648	0.0384622	0.115648	0.115648	0.0823791	0.0783424	0.056008	0.0476199	0.212832	0.0822137	0.0613433	0.0839745	0.0783424	0.0934083	0.0823791	0.148977	0.115769	0.148977	0.0823791	0.148977	0.0476199	0.0934083	0.200064	0.0783424	0.200064	0.0680322	0.0823791
Sinusitis	DOID:0050127	0.0322586	0.0783424	0.0934083	NA	0.0322586	0.0934083	0.0384622	NA	0.0476199	0.0781974	0.148977	0.0934083	0.0613433	0.115648	NA	0.171903	0.115648	0.0934083	0.0934083	0.0476199	0.0280133	0.115648	0.0384622	0.212832	0.115648	0.0823791	0.0783424	0.056008	0.0476199	0.115648	0.0822137	0.0613433	0.0839745	0.0783424	0.0934083	0.0823791	0.148977	0.115769	0.148977	0.0823791	0.148977	0.0476199	0.0934083	0.200064	0.0783424	0.200064	0.0680322	0.0823791
Glucose Intolerance	DOID:10603	0.0322586	0.0322586	0.0384622	NA	0.0322586	0.0384622	0.0384622	NA	0.0476199	0.0321989	0.0613433	0.0384622	0.0613433	0.0476199	NA	0.0384622	0.0476199	0.0384622	0.0384622	0.0476199	0.0280133	0.0476199	0.0384622	0.0476199	0.0476199	0.0823791	0.0322586	0.0230621	0.0476199	0.0476199	0.0338527	0.148977	0.0345777	0.0322586	0.0384622	0.0823791	0.0613433	0.115769	0.0613433	0.200064	0.0613433	0.0476199	0.0384622	0.0823791	0.0322586	0.0823791	0.0280133	0.200064
Meningocele	DOID:1088	0.0749632	0.0749632	0.0823791	NA	0.0749632	0.0823791	0.0823791	NA	0.0933603	0.0679241	0.109892	0.0823791	0.109892	0.0933603	NA	0.0823791	0.0933603	0.0823791	0.0823791	0.0933603	0.0698989	0.0933603	0.0823791	0.0933603	0.0933603	0.135413	0.0749632	0.0640035	0.0933603	0.0933603	0.0716984	0.109892	0.066053	0.0749632	0.0823791	0.135413	0.109892	0.176371	0.109892	0.135413	0.109892	0.0933603	0.0823791	0.135413	0.0749632	0.135413	0.0698989	0.135413
Eosinophilia-Myalgia Syndrome	DOID:998	0.0322586	0.0783424	0.0934083	NA	0.0322586	0.0934083	0.0384622	NA	0.0476199	0.0781974	0.148977	0.0934083	0.0613433	0.115648	NA	0.0934083	0.115648	0.0934083	0.0934083	0.0476199	0.0280133	0.115648	0.0384622	0.115648	0.115648	0.0823791	0.0783424	0.056008	0.0476199	0.115648	0.249997	0.0613433	0.0839745	0.0783424	0.0934083	0.0823791	0.148977	0.115769	0.148977	0.0823791	0.148977	0.0476199	0.0934083	0.200064	0.0783424	0.200064	0.0680322	0.0823791
Muscular Dystrophy, Emery-Dreifuss	DOID:11726	0.0262177	0.117177	0.0783424	NA	0.0262177	0.0783424	0.0322586	NA	0.0411723	0.065727	0.132409	0.0783424	0.0545214	0.09999	NA	0.0783424	0.09999	0.0783424	0.0783424	0.0411723	0.0220824	0.09999	0.0322586	0.09999	0.09999	0.0749632	0.0636715	0.0419131	0.0411723	0.720502	0.0690634	0.0545214	0.0728749	0.0636715	0.0783424	0.0749632	0.132409	0.10736	0.132409	0.0749632	0.132409	0.0411723	0.0783424	0.182054	0.0636715	0.182054	0.0536287	0.0749632
Gaucher Disease	DOID:1926	0.0322586	0.0322586	0.0384622	NA	0.0322586	0.0384622	0.0384622	NA	0.0476199	0.0321989	0.0613433	0.0384622	0.0613433	0.0476199	NA	0.0384622	0.0476199	0.0384622	0.0384622	0.0476199	0.0280133	0.0476199	0.0384622	0.0476199	0.0476199	0.0823791	0.0322586	0.0230621	0.0476199	0.0476199	0.0338527	0.274167	0.0345777	0.0322586	0.0384622	0.0823791	0.0613433	0.115769	0.0613433	0.368184	0.0613433	0.0476199	0.0384622	0.0823791	0.0322586	0.0823791	0.0280133	0.368184
Restless Legs Syndrome	DOID:0050425	0.0545214	0.132409	0.45301	NA	0.0545214	0.148977	0.0613433	NA	0.0714299	0.227704	0.21027	0.274167	0.0865818	0.319248	NA	0.148977	0.319248	0.45301	0.274167	0.0714299	0.049858	0.173473	0.0613433	0.173473	0.173473	0.109892	0.132409	0.198551	0.0714299	0.173473	0.130357	0.0865818	0.346526	0.243677	0.148977	0.109892	0.21027	0.147106	0.21027	0.109892	0.21027	0.0714299	0.148977	0.266882	0.243677	0.491152	0.368193	0.109892
Lissencephaly	DOID:0050453	0.0749632	0.0749632	0.0823791	NA	0.0749632	0.0823791	0.0823791	NA	0.0933603	0.0679241	0.109892	0.0823791	0.109892	0.0933603	NA	0.0823791	0.0933603	0.0823791	0.0823791	0.0933603	0.0698989	0.0933603	0.0823791	0.0933603	0.0933603	0.135413	0.0749632	0.0640035	0.0933603	0.0933603	0.0716984	0.109892	0.066053	0.0749632	0.0823791	0.135413	0.109892	0.176371	0.109892	0.135413	0.109892	0.0933603	0.0823791	0.135413	0.0749632	0.135413	0.0698989	0.135413
Purpura Fulminans	DOID:0060538	NA	NA	NA	NA	NA	NA	NA	NA	NA	NA	NA	NA	NA	NA	NA	NA	NA	NA	NA	NA	NA	NA	NA	NA	NA	NA	NA	NA	NA	NA	NA	NA	NA	NA	NA	NA	NA	NA	NA	NA	NA	NA	NA	NA	NA	NA	NA	NA
Hemangiosarcoma	DOID:0001816	0.184015	0.0411723	0.0476199	NA	0.184015	0.0476199	0.212832	NA	0.138778	0.0397384	0.0714299	0.0476199	0.0714299	0.0571439	NA	0.0476199	0.0571439	0.0476199	0.0476199	0.255398	0.164303	0.0571439	0.212832	0.0571439	0.0571439	0.0933603	0.0411723	0.0316203	0.0571439	0.0571439	0.0418146	0.0714299	0.0412673	0.0411723	0.0476199	0.0933603	0.0714299	0.12825	0.0714299	0.0933603	0.0714299	0.0571439	0.0476199	0.0933603	0.0411723	0.0933603	0.0367619	0.0933603
Sciatic Neuropathy	DOID:11446	0.0212766	0.0516718	0.120576	NA	0.0212766	0.0655184	0.0269781	NA	0.0353785	0.101912	0.116404	0.120576	0.0479309	0.261264	NA	0.0655184	0.261264	0.120576	0.120576	0.0353785	0.0173698	0.0859192	0.0269781	0.0859192	0.0859192	0.0670886	0.0516718	0.0572444	0.0353785	0.0859192	0.0580734	0.0479309	0.301624	0.0950936	0.0655184	0.0670886	0.116404	0.0972918	0.116404	0.0670886	0.116404	0.0353785	0.0655184	0.16293	0.0950936	0.299845	0.0776322	0.0670886
Cystinosis	DOID:1064	0.0545214	0.0545214	0.0613433	NA	0.0545214	0.0613433	0.0613433	NA	0.0714299	0.0509475	0.0865818	0.0613433	0.0865818	0.0714299	NA	0.0613433	0.0714299	0.0613433	0.0613433	0.0714299	0.049858	0.0714299	0.0613433	0.0714299	0.0714299	0.109892	0.0545214	0.0444246	0.0714299	0.0714299	0.0536764	0.386968	0.051166	0.0545214	0.0613433	0.109892	0.0865818	0.147106	0.0865818	0.491152	0.0865818	0.0714299	0.0613433	0.109892	0.0545214	0.109892	0.049858	0.491152
Neuroectodermal Tumors, Primitive	DOID:4790	0.193613	0.0262177	0.0322586	NA	0.193613	0.0322586	0.238225	NA	0.09999	0.0270641	0.0545214	0.0322586	0.0545214	0.0411723	NA	0.0322586	0.0411723	0.0322586	0.0322586	0.304051	0.163075	0.0411723	0.238225	0.0411723	0.0411723	0.0749632	0.0262177	0.0172584	0.0411723	0.0411723	0.0284379	0.0545214	0.0300073	0.0262177	0.0322586	0.0749632	0.0545214	0.10736	0.0545214	0.0749632	0.0545214	0.0411723	0.0322586	0.0749632	0.0262177	0.0749632	0.0220824	0.0749632
Cystadenocarcinoma, Papillary	DOID:3110	0.117177	0.0262177	0.0322586	NA	0.117177	0.0322586	0.144176	NA	0.09999	0.0270641	0.0545214	0.0322586	0.0545214	0.0411723	NA	0.0322586	0.0411723	0.0322586	0.0322586	0.184015	0.0986948	0.0411723	0.144176	0.0411723	0.0411723	0.0749632	0.0262177	0.0172584	0.0411723	0.0411723	0.0284379	0.0545214	0.0300073	0.0262177	0.0322586	0.0749632	0.0545214	0.10736	0.0545214	0.0749632	0.0545214	0.0411723	0.0322586	0.0749632	0.0262177	0.0749632	0.0220824	0.0749632
Autistic Disorder	DOID:12849	0.0411723	0.0411723	0.0476199	NA	0.0411723	0.0476199	0.0476199	NA	0.0571439	0.0397384	0.0714299	0.0476199	0.173473	0.0571439	NA	0.0476199	0.0571439	0.0476199	0.0476199	0.0571439	0.0367619	0.0571439	0.0476199	0.0571439	0.0571439	0.0933603	0.0411723	0.0316203	0.0571439	0.0571439	0.0418146	0.0714299	0.0412673	0.0411723	0.0476199	0.0933603	0.0714299	0.12825	0.0714299	0.0933603	0.0714299	0.0571439	0.0476199	0.0933603	0.0411723	0.0933603	0.0367619	0.0933603
Leukemia, Lymphocytic, Chronic, B-Cell	DOID:1040	0.163075	0.0220824	0.0280133	NA	0.163075	0.0280133	0.206874	NA	0.089279	0.0235373	0.049858	0.0280133	0.049858	0.0367619	NA	0.0280133	0.0367619	0.0280133	0.0280133	0.271481	0.468554	0.0367619	0.206874	0.0367619	0.0367619	0.0698989	0.0220824	0.0132837	0.0367619	0.0367619	0.0247223	0.049858	0.0268613	0.0220824	0.0280133	0.0698989	0.049858	0.101627	0.049858	0.0698989	0.049858	0.0367619	0.0280133	0.0698989	0.0220824	0.0698989	0.0180216	0.0698989
Mandibulofacial Dysostosis	DOID:2908	0.0411723	0.0411723	0.0476199	NA	0.0411723	0.0476199	0.0476199	NA	0.0571439	0.0397384	0.0714299	0.0476199	0.0714299	0.0571439	NA	0.0476199	0.0571439	0.0476199	0.0476199	0.0571439	0.0367619	0.0571439	0.0476199	0.0571439	0.0571439	0.417263	0.0411723	0.0316203	0.659999	0.0571439	0.0418146	0.0714299	0.0412673	0.0411723	0.0476199	0.0933603	0.0714299	0.12825	0.0714299	0.0933603	0.0714299	0.421999	0.0476199	0.0933603	0.0411723	0.0933603	0.0367619	0.0933603
Diabetes Insipidus	DOID:9409	0.0545214	0.132409	0.148977	NA	0.0545214	0.148977	0.0613433	NA	0.0714299	0.12373	0.21027	0.148977	0.0865818	0.173473	NA	0.148977	0.173473	0.148977	0.148977	0.0714299	0.049858	0.173473	0.0613433	0.173473	0.173473	0.109892	0.132409	0.107888	0.0714299	0.173473	0.130357	0.0865818	0.12426	0.132409	0.148977	0.109892	0.21027	0.147106	0.21027	0.109892	0.21027	0.0714299	0.148977	0.266882	0.132409	0.266882	0.121084	0.109892
Chondrosarcoma	DOID:3371	0.564516	0.0322586	0.0384622	NA	0.564516	0.0384622	0.284037	NA	0.115648	0.0321989	0.0613433	0.0384622	0.0613433	0.0476199	NA	0.0384622	0.0476199	0.0384622	0.0384622	0.351665	0.206874	0.0476199	0.284037	0.0476199	0.0476199	0.0823791	0.0322586	0.0230621	0.0476199	0.0476199	0.0338527	0.0613433	0.0345777	0.0322586	0.0384622	0.0823791	0.0613433	0.115769	0.0613433	0.0823791	0.0613433	0.0476199	0.0384622	0.0823791	0.0322586	0.0823791	0.0280133	0.0823791
Heart Failure	DOID:6000	0.0545214	0.132409	0.148977	NA	0.0545214	0.45301	0.0613433	NA	0.0714299	0.12373	0.21027	0.148977	0.0865818	0.173473	NA	0.148977	0.173473	0.148977	0.148977	0.0714299	0.049858	0.173473	0.0613433	0.173473	0.173473	0.109892	0.243677	0.107888	0.0714299	0.173473	0.130357	0.0865818	0.12426	0.132409	0.45301	0.109892	0.21027	0.147106	0.21027	0.109892	0.21027	0.0714299	0.274167	0.266882	0.132409	0.266882	0.121084	0.109892
Fibromatosis, Gingival	DOID:0060466	NA	NA	NA	NA	NA	NA	NA	NA	NA	NA	NA	NA	NA	NA	NA	NA	NA	NA	NA	NA	NA	NA	NA	NA	NA	NA	NA	NA	NA	NA	NA	NA	NA	NA	NA	NA	NA	NA	NA	NA	NA	NA	NA	NA	NA	NA	NA	NA
Osteochondrodysplasias	DOID:12721	0.0262177	0.302808	0.0783424	NA	0.0262177	0.0783424	0.0322586	NA	0.0411723	0.065727	0.132409	0.0783424	0.0545214	0.09999	NA	0.0783424	0.09999	0.0783424	0.0783424	0.0411723	0.0220824	0.09999	0.0322586	0.09999	0.09999	0.0749632	0.0636715	0.0419131	0.0411723	0.184015	0.0690634	0.0545214	0.0728749	0.0636715	0.0783424	0.0749632	0.132409	0.10736	0.132409	0.0749632	0.132409	0.0411723	0.0783424	0.182054	0.0636715	0.182054	0.0536287	0.0749632
Hypohidrosis	DOID:11155	0.0411723	0.09999	0.115648	NA	0.0411723	0.115648	0.0476199	NA	0.0571439	0.0965077	0.173473	0.115648	0.0714299	0.138778	NA	0.115648	0.138778	0.115648	0.115648	0.0571439	0.0367619	0.138778	0.0476199	0.138778	0.138778	0.0933603	0.09999	0.0767921	0.0571439	0.138778	0.10155	0.0714299	0.10022	0.09999	0.115648	0.0933603	0.173473	0.12825	0.173473	0.0933603	0.527499	0.0571439	0.115648	0.689451	0.09999	0.226732	0.089279	0.0933603
Arteriosclerosis	DOID:2349	0.0411723	0.09999	0.115648	NA	0.0411723	0.212832	0.0476199	NA	0.0571439	0.0965077	0.173473	0.115648	0.0714299	0.138778	NA	0.115648	0.138778	0.115648	0.115648	0.0571439	0.0367619	0.138778	0.0476199	0.138778	0.138778	0.0933603	0.475531	0.0767921	0.0571439	0.138778	0.10155	0.0714299	0.10022	0.09999	0.212832	0.0933603	0.173473	0.12825	0.173473	0.0933603	0.173473	0.0571439	0.351665	0.226732	0.09999	0.226732	0.089279	0.0933603
Piebaldism	DOID:3263	0.0411723	0.0411723	0.0476199	NA	0.0411723	0.0476199	0.0476199	NA	0.0571439	0.0397384	0.0714299	0.0476199	0.0714299	0.0571439	NA	0.0476199	0.0571439	0.0476199	0.0476199	0.0571439	0.0367619	0.0571439	0.0476199	0.0571439	0.0571439	0.417263	0.0411723	0.0316203	0.659999	0.0571439	0.0418146	0.0714299	0.0412673	0.0411723	0.0476199	0.0933603	0.0714299	0.12825	0.0714299	0.0933603	0.0714299	0.421999	0.0476199	0.0933603	0.0411723	0.0933603	0.0367619	0.0933603
Anus Neoplasms	DOID:4551	0.0783424	0.0322586	0.0384622	NA	0.0783424	0.0384622	0.0934083	NA	0.351665	0.0321989	0.0613433	0.0384622	0.0613433	0.0476199	NA	0.0384622	0.0476199	0.0384622	0.0384622	0.115648	0.0680322	0.0476199	0.0934083	0.0476199	0.0476199	0.0823791	0.0322586	0.0230621	0.0476199	0.0476199	0.0338527	0.0613433	0.0345777	0.0322586	0.0384622	0.0823791	0.0613433	0.115769	0.0613433	0.0823791	0.0613433	0.0476199	0.0384622	0.0823791	0.0322586	0.0823791	0.0280133	0.0823791
Protein C Deficiency	DOID:3756	0.0322586	0.0783424	0.0934083	NA	0.0322586	0.0934083	0.0384622	NA	0.0476199	0.0781974	0.148977	0.0934083	0.0613433	0.115648	NA	0.0934083	0.115648	0.0934083	0.0934083	0.0476199	0.0280133	0.115648	0.0384622	0.115648	0.115648	0.0823791	0.0783424	0.056008	0.0476199	0.115648	0.249997	0.0613433	0.0839745	0.0783424	0.0934083	0.0823791	0.148977	0.115769	0.148977	0.0823791	0.148977	0.0476199	0.0934083	0.200064	0.0783424	0.200064	0.0680322	0.0823791
Dermatitis, Contact	DOID:2773	0.0411723	0.09999	0.115648	NA	0.0411723	0.115648	0.0476199	NA	0.0571439	0.0965077	0.173473	0.115648	0.0714299	0.138778	NA	0.115648	0.138778	0.115648	0.115648	0.0571439	0.0367619	0.138778	0.0476199	0.138778	0.138778	0.0933603	0.09999	0.0767921	0.0571439	0.138778	0.10155	0.0714299	0.10022	0.09999	0.115648	0.0933603	0.173473	0.12825	0.173473	0.0933603	0.825	0.0571439	0.115648	0.689451	0.09999	0.226732	0.089279	0.0933603
Cerebrovascular Disorders	DOID:6713	0.0411723	0.09999	0.115648	NA	0.0411723	0.212832	0.0476199	NA	0.0571439	0.0965077	0.173473	0.115648	0.0714299	0.138778	NA	0.115648	0.138778	0.115648	0.115648	0.0571439	0.0367619	0.138778	0.0476199	0.138778	0.138778	0.0933603	0.475531	0.0767921	0.0571439	0.138778	0.10155	0.0714299	0.10022	0.09999	0.212832	0.0933603	0.173473	0.12825	0.173473	0.0933603	0.173473	0.0571439	0.351665	0.226732	0.09999	0.226732	0.089279	0.0933603
Anemia, Megaloblastic	DOID:13382	0.0322586	0.0783424	0.0934083	NA	0.0322586	0.0934083	0.0384622	NA	0.0476199	0.0781974	0.148977	0.0934083	0.0613433	0.115648	NA	0.0934083	0.115648	0.0934083	0.0934083	0.0476199	0.0280133	0.115648	0.0384622	0.115648	0.115648	0.0823791	0.0783424	0.056008	0.0476199	0.115648	0.249997	0.0613433	0.0839745	0.0783424	0.0934083	0.0823791	0.148977	0.115769	0.148977	0.0823791	0.148977	0.0476199	0.0934083	0.200064	0.0783424	0.200064	0.0680322	0.0823791
Hypersensitivity	DOID:1205	0.0545214	0.132409	0.148977	NA	0.0545214	0.148977	0.0613433	NA	0.0714299	0.12373	0.21027	0.148977	0.0865818	0.173473	NA	0.148977	0.173473	0.148977	0.148977	0.0714299	0.049858	0.173473	0.0613433	0.173473	0.173473	0.109892	0.132409	0.107888	0.0714299	0.173473	0.239901	0.0865818	0.12426	0.132409	0.148977	0.109892	0.21027	0.147106	0.21027	0.109892	0.21027	0.0714299	0.148977	0.266882	0.132409	0.266882	0.121084	0.109892
Multiple Endocrine Neoplasia Type 1	DOID:10017	0.0411723	0.0411723	0.0476199	NA	0.0411723	0.0476199	0.0476199	NA	0.0571439	0.0397384	0.0714299	0.0476199	0.0714299	0.0571439	NA	0.0476199	0.0571439	0.0476199	0.0476199	0.0571439	0.0367619	0.0571439	0.0476199	0.0571439	0.0571439	0.417263	0.0411723	0.0316203	0.659999	0.0571439	0.0418146	0.0714299	0.0412673	0.0411723	0.0476199	0.0933603	0.0714299	0.12825	0.0714299	0.0933603	0.0714299	0.421999	0.0476199	0.0933603	0.0411723	0.0933603	0.0367619	0.0933603
Chediak-Higashi Syndrome	DOID:2935	0.0411723	0.0411723	0.0476199	NA	0.0411723	0.0476199	0.0476199	NA	0.0571439	0.0397384	0.0714299	0.0476199	0.0714299	0.0571439	NA	0.0476199	0.0571439	0.0476199	0.0476199	0.0571439	0.0367619	0.0571439	0.0476199	0.0571439	0.0571439	0.417263	0.0411723	0.0316203	0.421999	0.0571439	0.0418146	0.0714299	0.0412673	0.0411723	0.0476199	0.0933603	0.0714299	0.12825	0.0714299	0.0933603	0.0714299	0.659999	0.0476199	0.0933603	0.0411723	0.0933603	0.0367619	0.0933603
Thyroid Diseases	DOID:50	0.0749632	0.182054	0.200064	NA	0.0749632	0.200064	0.0823791	NA	0.0933603	0.164959	0.266882	0.200064	0.109892	0.226732	NA	0.200064	0.226732	0.200064	0.200064	0.0933603	0.0698989	0.417263	0.0823791	0.226732	0.417263	0.135413	0.182054	0.155437	0.0933603	0.226732	0.174125	0.109892	0.160414	0.182054	0.200064	0.135413	0.491152	0.176371	0.491152	0.135413	0.266882	0.0933603	0.200064	0.328859	0.182054	0.328859	0.169754	0.135413
Epilepsy, Frontal Lobe	DOID:3331	0.0262177	0.0636715	0.238225	NA	0.0262177	0.0783424	0.0322586	NA	0.0411723	0.12096	0.132409	0.144176	0.0545214	0.184015	NA	0.0783424	0.184015	0.37258	0.144176	0.0411723	0.0220824	0.09999	0.0322586	0.09999	0.09999	0.0749632	0.0636715	0.0771343	0.0411723	0.09999	0.0690634	0.0545214	0.191655	0.117177	0.0783424	0.0749632	0.132409	0.10736	0.132409	0.0749632	0.132409	0.0411723	0.0783424	0.182054	0.117177	0.33504	0.386435	0.0749632
Atrial Fibrillation	DOID:0060224	0.0545214	0.132409	0.148977	NA	0.0545214	0.274167	0.0613433	NA	0.0714299	0.12373	0.21027	0.148977	0.0865818	0.173473	NA	0.148977	0.173473	0.148977	0.148977	0.0714299	0.049858	0.173473	0.0613433	0.173473	0.173473	0.109892	0.243677	0.107888	0.0714299	0.173473	0.130357	0.0865818	0.12426	0.132409	0.274167	0.109892	0.21027	0.147106	0.21027	0.109892	0.21027	0.0714299	0.274167	0.266882	0.132409	0.266882	0.121084	0.109892
Polyhydramnios	DOID:8488	0.0322586	0.0783424	0.0934083	NA	0.0322586	0.0934083	0.0384622	NA	0.0476199	0.0781974	0.148977	0.0934083	0.0613433	0.115648	NA	0.0934083	0.115648	0.0934083	0.0934083	0.0476199	0.0280133	0.115648	0.0384622	0.115648	0.115648	0.0823791	0.0783424	0.056008	0.0476199	0.115648	0.0822137	0.0613433	0.0839745	0.0783424	0.0934083	0.0823791	0.148977	0.115769	0.148977	0.0823791	0.148977	0.0476199	0.0934083	0.200064	0.0783424	0.200064	0.0680322	0.0823791
Leukocyte Disorders	DOID:9500	0.0545214	0.132409	0.148977	NA	0.0545214	0.148977	0.0613433	NA	0.0714299	0.12373	0.21027	0.148977	0.0865818	0.173473	NA	0.148977	0.173473	0.148977	0.148977	0.0714299	0.049858	0.173473	0.0613433	0.173473	0.173473	0.109892	0.132409	0.107888	0.0714299	0.173473	0.396392	0.0865818	0.12426	0.132409	0.148977	0.109892	0.21027	0.147106	0.21027	0.109892	0.21027	0.0714299	0.148977	0.266882	0.132409	0.266882	0.121084	0.109892
Epidermolysis Bullosa	DOID:2730	0.0411723	0.09999	0.115648	NA	0.0411723	0.115648	0.0476199	NA	0.0571439	0.0965077	0.173473	0.115648	0.0714299	0.138778	NA	0.115648	0.138778	0.115648	0.115648	0.0571439	0.0367619	0.138778	0.0476199	0.138778	0.138778	0.0933603	0.09999	0.0767921	0.0571439	0.138778	0.10155	0.0714299	0.10022	0.09999	0.115648	0.0933603	0.173473	0.12825	0.173473	0.0933603	0.527499	0.0571439	0.115648	0.689451	0.09999	0.226732	0.089279	0.0933603
Panniculitis, Nodular Nonsuppurative	DOID:1525	0.0332855	0.114122	0.0932501	NA	0.0332855	0.0932501	0.0383971	NA	0.0458987	0.0803935	0.138534	0.0932501	0.0570433	0.111468	NA	0.0932501	0.111468	0.0932501	0.0932501	0.0458987	0.0297735	0.111468	0.0383971	0.111468	0.111468	0.0739038	0.0808363	0.0623249	0.0458987	0.540385	0.0838621	0.0570433	0.0851542	0.0808363	0.0932501	0.0739038	0.138534	0.100127	0.138534	0.0739038	0.421256	0.0458987	0.0932501	0.545768	0.0808363	0.179481	0.0723071	0.0739038
Dementia, Vascular	DOID:8725	0.0545214	0.0545214	0.0613433	NA	0.0545214	0.0613433	0.0613433	NA	0.0714299	0.0509475	0.0865818	0.0613433	0.386968	0.0714299	NA	0.0613433	0.0714299	0.0613433	0.0613433	0.0714299	0.049858	0.0714299	0.0613433	0.0714299	0.0714299	0.109892	0.0545214	0.0444246	0.0714299	0.0714299	0.0536764	0.0865818	0.051166	0.0545214	0.0613433	0.109892	0.0865818	0.147106	0.0865818	0.109892	0.0865818	0.0714299	0.0613433	0.109892	0.0545214	0.109892	0.049858	0.109892
Phenylketonurias	DOID:9281	0.0545214	0.0545214	0.0613433	NA	0.0545214	0.0613433	0.0613433	NA	0.0714299	0.0509475	0.0865818	0.0613433	0.0865818	0.0714299	NA	0.0613433	0.0714299	0.0613433	0.0613433	0.0714299	0.049858	0.0714299	0.0613433	0.0714299	0.0714299	0.109892	0.0545214	0.0444246	0.0714299	0.0714299	0.0536764	0.386968	0.051166	0.0545214	0.0613433	0.109892	0.0865818	0.147106	0.0865818	0.491152	0.0865818	0.0714299	0.0613433	0.109892	0.0545214	0.109892	0.049858	0.491152
Neurotic Disorders	DOID:4964	0.0545214	0.0545214	0.0613433	NA	0.0545214	0.0613433	0.0613433	NA	0.0714299	0.0509475	0.0865818	0.0613433	0.386968	0.0714299	NA	0.0613433	0.0714299	0.0613433	0.0613433	0.0714299	0.049858	0.0714299	0.0613433	0.0714299	0.0714299	0.109892	0.0545214	0.0444246	0.0714299	0.0714299	0.0536764	0.0865818	0.051166	0.0545214	0.0613433	0.109892	0.0865818	0.147106	0.0865818	0.109892	0.0865818	0.0714299	0.0613433	0.109892	0.0545214	0.109892	0.049858	0.109892
Dyslexia	DOID:13417	0.0322586	0.0322586	0.0384622	NA	0.0322586	0.0384622	0.0384622	NA	0.0476199	0.0321989	0.0613433	0.0384622	0.148977	0.0476199	NA	0.0384622	0.0476199	0.0384622	0.0384622	0.0476199	0.0280133	0.0476199	0.0384622	0.0476199	0.0476199	0.0823791	0.0322586	0.0230621	0.0476199	0.0476199	0.0338527	0.0613433	0.0345777	0.0322586	0.0384622	0.0823791	0.0613433	0.115769	0.0613433	0.0823791	0.0613433	0.0476199	0.0384622	0.0823791	0.0322586	0.0823791	0.0280133	0.0823791
Hyperaldosteronism	DOID:446	0.0322586	0.0783424	0.0934083	NA	0.0322586	0.0934083	0.0384622	NA	0.0476199	0.0781974	0.148977	0.0934083	0.0613433	0.115648	NA	0.0934083	0.115648	0.0934083	0.0934083	0.0476199	0.0280133	0.833333	0.0384622	0.115648	0.212832	0.0823791	0.0783424	0.056008	0.0476199	0.115648	0.0822137	0.0613433	0.0839745	0.0783424	0.0934083	0.0823791	0.274167	0.115769	0.708501	0.0823791	0.148977	0.0476199	0.0934083	0.200064	0.0783424	0.200064	0.0680322	0.0823791
Pulmonary Emphysema	DOID:9675	0.0262177	0.0636715	0.0783424	NA	0.0262177	0.0783424	0.0322586	NA	0.0411723	0.065727	0.132409	0.0783424	0.0545214	0.09999	NA	0.37258	0.09999	0.0783424	0.0783424	0.0411723	0.0220824	0.09999	0.0322586	0.720502	0.09999	0.0749632	0.0636715	0.0419131	0.0411723	0.09999	0.0690634	0.0545214	0.0728749	0.0636715	0.0783424	0.0749632	0.132409	0.10736	0.132409	0.0749632	0.132409	0.0411723	0.0783424	0.182054	0.0636715	0.182054	0.0536287	0.0749632
Hydrops Fetalis	DOID:1097	NA	NA	NA	NA	NA	NA	NA	NA	NA	NA	NA	NA	NA	NA	NA	NA	NA	NA	NA	NA	NA	NA	NA	NA	NA	NA	NA	NA	NA	NA	NA	NA	NA	NA	NA	NA	NA	NA	NA	NA	NA	NA	NA	NA	NA	NA	NA	NA
Muscular Dystrophy, Oculopharyngeal	DOID:11719	0.0197465	0.0882546	0.10213	NA	0.0197465	0.0588126	0.024217	NA	0.0307603	0.220625	0.0982183	0.252414	0.0404428	0.131286	NA	0.0588126	0.131286	0.10213	0.252414	0.0307603	0.0166693	0.0747035	0.024217	0.0747035	0.0747035	0.0550051	0.0479557	0.12425	0.0307603	0.538295	0.0534242	0.0404428	0.102729	0.201051	0.0588126	0.0550051	0.0982183	0.0774499	0.0982183	0.0550051	0.0982183	0.0307603	0.0588126	0.133584	0.300917	0.239319	0.0684982	0.0550051
Unverricht-Lundborg Syndrome	DOID:3535	0.0192322	0.0467067	0.185269	NA	0.0192322	0.0609274	0.0250878	NA	0.0337236	0.0943076	0.113285	0.112127	0.0466468	0.150724	NA	0.0609274	0.150724	0.289758	0.112127	0.0337236	0.0152224	0.0819002	0.0250878	0.0819002	0.0819002	0.0664141	0.0467067	0.0471222	0.0337236	0.0819002	0.0538103	0.0466468	0.152695	0.085956	0.0609274	0.0664141	0.113285	0.0976859	0.113285	0.0664141	0.113285	0.0337236	0.0609274	0.161291	0.085956	0.29683	0.395775	0.0664141
Malaria, Falciparum	DOID:14067	0.0411723	0.0411723	0.0476199	NA	0.0411723	0.0476199	0.0476199	NA	0.0571439	0.0397384	0.0714299	0.0476199	0.0714299	0.0571439	NA	0.0476199	0.0571439	0.0476199	0.0476199	0.0571439	0.0367619	0.0571439	0.0476199	0.0571439	0.0571439	0.0933603	0.0411723	0.0316203	0.0571439	0.0571439	0.0418146	0.0714299	0.0412673	0.0411723	0.0476199	0.226732	0.0714299	0.12825	0.0714299	0.0933603	0.0714299	0.0571439	0.0476199	0.0933603	0.0411723	0.0933603	0.0367619	0.0933603
Menkes Kinky Hair Syndrome	DOID:1838	0.0432983	0.105153	0.117967	NA	0.0432983	0.117967	0.0485747	NA	0.0563205	0.101558	0.164736	0.117967	0.0678325	0.136778	NA	0.117967	0.136778	0.117967	0.117967	0.0563205	0.0396737	0.136778	0.0485747	0.136778	0.136778	0.0852598	0.105153	0.0860499	0.0563205	0.136778	0.10598	0.30317	0.10423	0.105153	0.117967	0.0852598	0.164736	0.112391	0.164736	0.381059	0.30317	0.0563205	0.117967	0.381059	0.105153	0.207059	0.0963504	0.381059
Scleroderma, Systemic	DOID:418	0.026878	0.198489	0.0776536	NA	0.026878	0.0776536	0.031975	NA	0.0394576	0.0668442	0.122834	0.0776536	0.0505789	0.0958257	NA	0.0776536	0.0958257	0.0776536	0.0776536	0.0394576	0.0233766	0.0958257	0.031975	0.0958257	0.0958257	0.0674154	0.0652751	0.0468218	0.0394576	0.176351	0.119584	0.0505789	0.0730082	0.0652751	0.0776536	0.0674154	0.122834	0.0936287	0.122834	0.0674154	0.122834	0.0394576	0.0776536	0.163723	0.0652751	0.163723	0.0567718	0.0674154
Neurodegenerative Diseases	DOID:1289	0.0545214	0.132409	0.708501	NA	0.0545214	0.148977	0.0613433	NA	0.0714299	0.227704	0.21027	0.274167	0.0865818	0.319248	NA	0.148977	0.319248	0.45301	0.274167	0.0714299	0.049858	0.173473	0.0613433	0.173473	0.173473	0.109892	0.132409	0.198551	0.0714299	0.173473	0.130357	0.0865818	0.514878	0.243677	0.148977	0.109892	0.21027	0.147106	0.21027	0.109892	0.21027	0.0714299	0.148977	0.266882	0.243677	0.491152	0.368193	0.109892
Gout	DOID:13189	0.0262177	0.458801	0.0783424	NA	0.0262177	0.0783424	0.0322586	NA	0.0411723	0.065727	0.132409	0.0783424	0.0545214	0.09999	NA	0.0783424	0.09999	0.0783424	0.0783424	0.0411723	0.0220824	0.09999	0.0322586	0.09999	0.09999	0.0749632	0.0636715	0.0419131	0.0411723	0.184015	0.0690634	0.0545214	0.0728749	0.0636715	0.0783424	0.0749632	0.132409	0.10736	0.132409	0.0749632	0.132409	0.0411723	0.0783424	0.182054	0.0636715	0.182054	0.0536287	0.0749632
Pneumothorax	DOID:1673	0.0411723	0.09999	0.115648	NA	0.0411723	0.115648	0.0476199	NA	0.0571439	0.0965077	0.173473	0.115648	0.0714299	0.138778	NA	0.351665	0.138778	0.115648	0.115648	0.0571439	0.0367619	0.138778	0.0476199	0.421999	0.138778	0.0933603	0.09999	0.0767921	0.0571439	0.138778	0.10155	0.0714299	0.10022	0.09999	0.115648	0.0933603	0.173473	0.12825	0.173473	0.0933603	0.173473	0.0571439	0.115648	0.226732	0.09999	0.226732	0.089279	0.0933603
Diabetes Insipidus, Nephrogenic	DOID:12387	0.0411723	0.09999	0.115648	NA	0.0411723	0.115648	0.0476199	NA	0.0571439	0.0965077	0.173473	0.115648	0.0714299	0.138778	NA	0.115648	0.138778	0.115648	0.115648	0.0571439	0.0367619	0.138778	0.0476199	0.138778	0.138778	0.0933603	0.09999	0.0767921	0.0571439	0.138778	0.10155	0.0714299	0.10022	0.09999	0.115648	0.0933603	0.173473	0.12825	0.173473	0.0933603	0.173473	0.0571439	0.115648	0.226732	0.09999	0.226732	0.089279	0.0933603
Diabetes, Gestational	DOID:11714	0.0322586	0.0322586	0.0384622	NA	0.0322586	0.0384622	0.0384622	NA	0.0476199	0.0321989	0.0613433	0.0384622	0.0613433	0.0476199	NA	0.0384622	0.0476199	0.0384622	0.0384622	0.0476199	0.0280133	0.0476199	0.0384622	0.0476199	0.0476199	0.0823791	0.0322586	0.0230621	0.0476199	0.0476199	0.0338527	0.148977	0.0345777	0.0322586	0.0384622	0.0823791	0.0613433	0.115769	0.0613433	0.200064	0.0613433	0.0476199	0.0384622	0.0823791	0.0322586	0.0823791	0.0280133	0.200064
Bone Resorption	DOID:0080011	0.0322586	0.37258	0.0934083	NA	0.0322586	0.0934083	0.0384622	NA	0.0476199	0.0781974	0.148977	0.0934083	0.0613433	0.115648	NA	0.0934083	0.115648	0.0934083	0.0934083	0.0476199	0.0280133	0.115648	0.0384622	0.115648	0.115648	0.0823791	0.0783424	0.056008	0.0476199	0.212832	0.0822137	0.0613433	0.0839745	0.0783424	0.0934083	0.0823791	0.148977	0.115769	0.148977	0.0823791	0.148977	0.0476199	0.0934083	0.200064	0.0783424	0.200064	0.0680322	0.0823791
Choroid Diseases	DOID:1417	0.0262177	0.0636715	0.144176	NA	0.0262177	0.0783424	0.0322586	NA	0.0411723	0.445196	0.132409	0.564516	0.0545214	0.184015	NA	0.0783424	0.184015	0.144176	0.564516	0.0411723	0.0220824	0.09999	0.0322586	0.09999	0.09999	0.0749632	0.0636715	0.302016	0.0411723	0.09999	0.0690634	0.0545214	0.134114	0.458801	0.0783424	0.0749632	0.132409	0.10736	0.132409	0.0749632	0.132409	0.0411723	0.0783424	0.182054	0.302808	0.33504	0.0986948	0.0749632
Ureteral Neoplasms	DOID:11819	0.304051	0.0411723	0.0476199	NA	0.304051	0.0476199	0.351665	NA	0.138778	0.0397384	0.0714299	0.0476199	0.0714299	0.0571439	NA	0.0476199	0.0571439	0.0476199	0.0476199	0.421999	0.271481	0.0571439	0.351665	0.0571439	0.0571439	0.0933603	0.0411723	0.0316203	0.0571439	0.0571439	0.0418146	0.0714299	0.0412673	0.0411723	0.0476199	0.0933603	0.0714299	0.12825	0.0714299	0.0933603	0.0714299	0.0571439	0.0476199	0.0933603	0.0411723	0.0933603	0.0367619	0.0933603
Polycythemia	DOID:8432	0.0411723	0.09999	0.115648	NA	0.0411723	0.115648	0.0476199	NA	0.0571439	0.0965077	0.173473	0.115648	0.0714299	0.138778	NA	0.115648	0.138778	0.115648	0.115648	0.0571439	0.0367619	0.138778	0.0476199	0.138778	0.138778	0.0933603	0.09999	0.0767921	0.0571439	0.138778	0.308794	0.0714299	0.10022	0.09999	0.115648	0.0933603	0.173473	0.12825	0.173473	0.0933603	0.173473	0.0571439	0.115648	0.226732	0.09999	0.226732	0.089279	0.0933603
Cataract	DOID:83	NA	NA	NA	NA	NA	NA	NA	NA	NA	NA	NA	NA	NA	NA	NA	NA	NA	NA	NA	NA	NA	NA	NA	NA	NA	NA	NA	NA	NA	NA	NA	NA	NA	NA	NA	NA	NA	NA	NA	NA	NA	NA	NA	NA	NA	NA	NA	NA
Cerebral Amyloid Angiopathy	DOID:9246	0.0545214	0.0545214	0.0613433	NA	0.0545214	0.0613433	0.0613433	NA	0.0714299	0.0509475	0.0865818	0.0613433	0.0865818	0.0714299	NA	0.0613433	0.0714299	0.0613433	0.0613433	0.0714299	0.049858	0.0714299	0.0613433	0.0714299	0.0714299	0.109892	0.0545214	0.0444246	0.0714299	0.0714299	0.0536764	0.21027	0.051166	0.0545214	0.0613433	0.109892	0.0865818	0.147106	0.0865818	0.266882	0.0865818	0.0714299	0.0613433	0.109892	0.0545214	0.109892	0.049858	0.266882
Lesch-Nyhan Syndrome	DOID:1919	0.0545214	0.0545214	0.0613433	NA	0.0545214	0.0613433	0.0613433	NA	0.0714299	0.0509475	0.0865818	0.0613433	0.0865818	0.0714299	NA	0.0613433	0.0714299	0.0613433	0.0613433	0.0714299	0.049858	0.0714299	0.0613433	0.0714299	0.0714299	0.109892	0.0545214	0.0444246	0.0714299	0.0714299	0.0536764	0.386968	0.051166	0.0545214	0.0613433	0.109892	0.0865818	0.147106	0.0865818	0.491152	0.0865818	0.0714299	0.0613433	0.109892	0.0545214	0.109892	0.049858	0.491152
Hematologic Neoplasms	DOID:2531	0.304051	0.0411723	0.0476199	NA	0.304051	0.0476199	0.351665	NA	0.138778	0.0397384	0.0714299	0.0476199	0.0714299	0.0571439	NA	0.0476199	0.0571439	0.0476199	0.0476199	0.421999	0.643322	0.0571439	0.351665	0.0571439	0.0571439	0.0933603	0.0411723	0.0316203	0.0571439	0.0571439	0.0418146	0.0714299	0.0412673	0.0411723	0.0476199	0.0933603	0.0714299	0.12825	0.0714299	0.0933603	0.0714299	0.0571439	0.0476199	0.0933603	0.0411723	0.0933603	0.0367619	0.0933603
Prader-Willi Syndrome	DOID:11983	0.0749632	0.0749632	0.0823791	NA	0.0749632	0.0823791	0.0823791	NA	0.0933603	0.0679241	0.109892	0.0823791	0.109892	0.0933603	NA	0.0823791	0.0933603	0.0823791	0.0823791	0.0933603	0.0698989	0.0933603	0.0823791	0.0933603	0.0933603	0.328859	0.0749632	0.0640035	0.226732	0.0933603	0.0716984	0.109892	0.066053	0.0749632	0.0823791	0.135413	0.109892	0.176371	0.109892	0.135413	0.109892	0.226732	0.0823791	0.135413	0.0749632	0.135413	0.0698989	0.135413
Enterocolitis, Necrotizing	DOID:8677	0.0749632	0.182054	0.200064	NA	0.0749632	0.200064	0.0823791	NA	0.0933603	0.164959	0.491152	0.200064	0.109892	0.226732	NA	0.200064	0.226732	0.200064	0.200064	0.0933603	0.0698989	0.226732	0.0823791	0.226732	0.226732	0.135413	0.182054	0.155437	0.0933603	0.226732	0.174125	0.109892	0.160414	0.182054	0.200064	0.135413	0.266882	0.176371	0.266882	0.135413	0.266882	0.0933603	0.200064	0.328859	0.182054	0.328859	0.169754	0.135413
Personality Disorders	DOID:1509	0.0749632	0.0749632	0.0823791	NA	0.0749632	0.0823791	0.0823791	NA	0.0933603	0.0679241	0.109892	0.0823791	0.266882	0.0933603	NA	0.0823791	0.0933603	0.0823791	0.0823791	0.0933603	0.0698989	0.0933603	0.0823791	0.0933603	0.0933603	0.135413	0.0749632	0.0640035	0.0933603	0.0933603	0.0716984	0.109892	0.066053	0.0749632	0.0823791	0.135413	0.109892	0.176371	0.109892	0.135413	0.109892	0.0933603	0.0823791	0.135413	0.0749632	0.135413	0.0698989	0.135413
Polycythemia Vera	DOID:8997	0.0322586	0.0783424	0.0934083	NA	0.0322586	0.0934083	0.0384622	NA	0.0476199	0.0781974	0.148977	0.0934083	0.0613433	0.115648	NA	0.0934083	0.115648	0.0934083	0.0934083	0.0476199	0.0280133	0.115648	0.0384622	0.115648	0.115648	0.0823791	0.0783424	0.056008	0.0476199	0.115648	0.249997	0.0613433	0.0839745	0.0783424	0.0934083	0.0823791	0.148977	0.115769	0.148977	0.0823791	0.148977	0.0476199	0.0934083	0.200064	0.0783424	0.200064	0.0680322	0.0823791
Waardenburg's Syndrome	DOID:9258	0.0411723	0.0411723	0.0476199	NA	0.0411723	0.0476199	0.0476199	NA	0.0571439	0.0397384	0.0714299	0.0476199	0.0714299	0.0571439	NA	0.0476199	0.0571439	0.0476199	0.0476199	0.0571439	0.0367619	0.0571439	0.0476199	0.0571439	0.0571439	0.417263	0.0411723	0.0316203	0.659999	0.0571439	0.0418146	0.0714299	0.0412673	0.0411723	0.0476199	0.0933603	0.0714299	0.12825	0.0714299	0.0933603	0.0714299	0.421999	0.0476199	0.0933603	0.0411723	0.0933603	0.0367619	0.0933603
Carotid Artery Diseases	DOID:3407	0.0322586	0.0783424	0.0934083	NA	0.0322586	0.171903	0.0384622	NA	0.0476199	0.0781974	0.148977	0.0934083	0.0613433	0.115648	NA	0.0934083	0.115648	0.0934083	0.0934083	0.0476199	0.0280133	0.115648	0.0384622	0.115648	0.115648	0.0823791	0.37258	0.056008	0.0476199	0.115648	0.0822137	0.0613433	0.0839745	0.0783424	0.171903	0.0823791	0.148977	0.115769	0.148977	0.0823791	0.148977	0.0476199	0.284037	0.200064	0.0783424	0.200064	0.0680322	0.0823791
Hamartoma Syndrome, Multiple	DOID:6457	0.0411723	0.0411723	0.0476199	NA	0.0411723	0.0476199	0.0476199	NA	0.0571439	0.0397384	0.0714299	0.0476199	0.0714299	0.0571439	NA	0.0476199	0.0571439	0.0476199	0.0476199	0.0571439	0.0367619	0.0571439	0.0476199	0.0571439	0.0571439	0.417263	0.0411723	0.0316203	0.659999	0.0571439	0.0418146	0.0714299	0.0412673	0.0411723	0.0476199	0.0933603	0.0714299	0.12825	0.0714299	0.0933603	0.0714299	0.421999	0.0476199	0.0933603	0.0411723	0.0933603	0.0367619	0.0933603
Iron Metabolism Disorders	DOID:2351	0.0545214	0.0545214	0.0613433	NA	0.0545214	0.0613433	0.0613433	NA	0.0714299	0.0509475	0.0865818	0.0613433	0.0865818	0.0714299	NA	0.0613433	0.0714299	0.0613433	0.0613433	0.0714299	0.049858	0.0714299	0.0613433	0.0714299	0.0714299	0.109892	0.0545214	0.0444246	0.0714299	0.0714299	0.0536764	0.21027	0.051166	0.0545214	0.0613433	0.109892	0.0865818	0.147106	0.0865818	0.266882	0.0865818	0.0714299	0.0613433	0.109892	0.0545214	0.109892	0.049858	0.266882
Glaucoma	DOID:1686	0.0220824	0.0536287	0.125202	NA	0.0220824	0.0680322	0.0280133	NA	0.0367619	0.54348	0.121084	0.490223	0.049858	0.164303	NA	0.0680322	0.164303	0.125202	0.490223	0.0367619	0.0180216	0.089279	0.0280133	0.089279	0.089279	0.0698989	0.0536287	0.506669	0.0367619	0.089279	0.0600399	0.049858	0.120054	0.386435	0.0680322	0.0698989	0.121084	0.101627	0.121084	0.0698989	0.121084	0.0367619	0.0680322	0.169754	0.255047	0.312405	0.0805457	0.0698989
Leukemia, Myeloid	DOID:8593	0.142026	0.0192322	0.0250878	NA	0.142026	0.0250878	0.185269	NA	0.0819002	0.0211008	0.0466468	0.0250878	0.0466468	0.0337236	NA	0.0250878	0.0337236	0.0250878	0.0250878	0.249044	0.580615	0.0337236	0.185269	0.0337236	0.0337236	0.0664141	0.0192322	0.0105433	0.0337236	0.0337236	0.0221572	0.0466468	0.0246847	0.0192322	0.0250878	0.0664141	0.0466468	0.0976859	0.0466468	0.0664141	0.0466468	0.0337236	0.0250878	0.0664141	0.0192322	0.0664141	0.0152224	0.0664141
Disseminated Intravascular Coagulation	DOID:11247	0.0322586	0.0783424	0.0934083	NA	0.0322586	0.0934083	0.0384622	NA	0.0476199	0.0781974	0.148977	0.0934083	0.0613433	0.115648	NA	0.0934083	0.115648	0.0934083	0.0934083	0.0476199	0.0280133	0.115648	0.0384622	0.115648	0.115648	0.0823791	0.0783424	0.056008	0.0476199	0.115648	0.249997	0.0613433	0.0839745	0.0783424	0.0934083	0.0823791	0.148977	0.115769	0.148977	0.0823791	0.148977	0.0476199	0.0934083	0.200064	0.0783424	0.200064	0.0680322	0.0823791
Cranial Nerve Diseases	DOID:3817	0.0411723	0.09999	0.212832	NA	0.0411723	0.115648	0.0476199	NA	0.0571439	0.177607	0.173473	0.212832	0.0714299	0.421999	NA	0.115648	0.659999	0.212832	0.212832	0.0571439	0.0367619	0.138778	0.0476199	0.138778	0.138778	0.0933603	0.09999	0.141323	0.0571439	0.138778	0.10155	0.0714299	0.304752	0.184015	0.115648	0.0933603	0.173473	0.12825	0.173473	0.0933603	0.173473	0.0571439	0.115648	0.226732	0.184015	0.417263	0.164303	0.0933603
Ehlers-Danlos Syndrome	DOID:13359	0.0571154	0.271814	0.117967	NA	0.0571154	0.117967	0.0625464	NA	0.070519	0.101558	0.164736	0.117967	0.0823681	0.136778	NA	0.117967	0.136778	0.117967	0.117967	0.070519	0.0533847	0.136778	0.0625464	0.136778	0.136778	0.448305	0.105153	0.0860499	0.315177	0.231435	0.10598	0.0823681	0.10423	0.105153	0.117967	0.100306	0.164736	0.128231	0.164736	0.100306	0.164736	0.315177	0.117967	0.207059	0.105153	0.207059	0.0963504	0.100306
De Lange Syndrome	DOID:11725	0.10736	0.10736	0.115769	NA	0.10736	0.115769	0.115769	NA	0.12825	0.0943727	0.147106	0.115769	0.147106	0.12825	NA	0.115769	0.12825	0.115769	0.115769	0.12825	0.101627	0.12825	0.115769	0.12825	0.12825	0.428329	0.10736	0.094962	0.311463	0.12825	0.0999124	0.147106	0.0889973	0.10736	0.115769	0.176371	0.147106	0.223744	0.147106	0.176371	0.147106	0.311463	0.115769	0.176371	0.10736	0.176371	0.101627	0.176371
Sarcoma, Ewing's	DOID:3369	0.458801	0.0262177	0.0322586	NA	0.458801	0.0322586	0.238225	NA	0.09999	0.0270641	0.0545214	0.0322586	0.0545214	0.0411723	NA	0.0322586	0.0411723	0.0322586	0.0322586	0.304051	0.163075	0.0411723	0.238225	0.0411723	0.0411723	0.0749632	0.0262177	0.0172584	0.0411723	0.0411723	0.0284379	0.0545214	0.0300073	0.0262177	0.0322586	0.0749632	0.0545214	0.10736	0.0545214	0.0749632	0.0545214	0.0411723	0.0322586	0.0749632	0.0262177	0.0749632	0.0220824	0.0749632
Fabry Disease	DOID:14499	0.0322586	0.0322586	0.0384622	NA	0.0322586	0.0384622	0.0384622	NA	0.0476199	0.0321989	0.0613433	0.0384622	0.0613433	0.0476199	NA	0.0384622	0.0476199	0.0384622	0.0384622	0.0476199	0.0280133	0.0476199	0.0384622	0.0476199	0.0476199	0.0823791	0.0322586	0.0230621	0.0476199	0.0476199	0.0338527	0.274167	0.0345777	0.0322586	0.0384622	0.0823791	0.0613433	0.115769	0.0613433	0.368184	0.0613433	0.0476199	0.0384622	0.0823791	0.0322586	0.0823791	0.0280133	0.368184
Stevens-Johnson Syndrome	DOID:0050426	0.0545214	0.132409	0.148977	NA	0.0545214	0.148977	0.0613433	NA	0.0714299	0.12373	0.21027	0.148977	0.0865818	0.173473	NA	0.148977	0.173473	0.148977	0.148977	0.0714299	0.049858	0.173473	0.0613433	0.173473	0.173473	0.109892	0.132409	0.107888	0.0714299	0.173473	0.130357	0.0865818	0.12426	0.132409	0.148977	0.109892	0.21027	0.147106	0.21027	0.109892	0.639393	0.0714299	0.148977	0.811538	0.132409	0.266882	0.121084	0.109892
Porphyria, Variegate	DOID:4346	0.0411723	0.0411723	0.0476199	NA	0.0411723	0.0476199	0.0476199	NA	0.0571439	0.0397384	0.0714299	0.0476199	0.0714299	0.0571439	NA	0.0476199	0.0571439	0.0476199	0.0476199	0.0571439	0.0367619	0.0571439	0.0476199	0.0571439	0.0571439	0.0933603	0.0411723	0.0316203	0.0571439	0.0571439	0.0418146	0.319248	0.0412673	0.0411723	0.0476199	0.0933603	0.0714299	0.12825	0.0714299	0.689451	0.0714299	0.0571439	0.0476199	0.0933603	0.0411723	0.0933603	0.0367619	0.417263
Laryngeal Neoplasms	DOID:2596	0.304051	0.0411723	0.0476199	NA	0.304051	0.0476199	0.351665	NA	0.138778	0.0397384	0.0714299	0.0476199	0.0714299	0.0571439	NA	0.0476199	0.0571439	0.0476199	0.0476199	0.421999	0.271481	0.0571439	0.351665	0.0571439	0.0571439	0.0933603	0.0411723	0.0316203	0.0571439	0.0571439	0.0418146	0.0714299	0.0412673	0.0411723	0.0476199	0.0933603	0.0714299	0.12825	0.0714299	0.0933603	0.0714299	0.0571439	0.0476199	0.0933603	0.0411723	0.0933603	0.0367619	0.0933603
Bloom Syndrome	DOID:2717	0.0411723	0.0411723	0.0476199	NA	0.0411723	0.0476199	0.0476199	NA	0.0571439	0.0397384	0.0714299	0.0476199	0.0714299	0.0571439	NA	0.0476199	0.0571439	0.0476199	0.0476199	0.0571439	0.0367619	0.0571439	0.0476199	0.0571439	0.0571439	0.417263	0.0411723	0.0316203	0.421999	0.0571439	0.0418146	0.0714299	0.0412673	0.0411723	0.0476199	0.0933603	0.0714299	0.12825	0.0714299	0.0933603	0.0714299	0.659999	0.0476199	0.0933603	0.0411723	0.0933603	0.0367619	0.0933603
Persistent Fetal Circulation Syndrome	DOID:13042	0.0262177	0.0636715	0.0783424	NA	0.0262177	0.144176	0.0322586	NA	0.0411723	0.065727	0.132409	0.0783424	0.0545214	0.09999	NA	0.0783424	0.09999	0.0783424	0.0783424	0.0411723	0.0220824	0.09999	0.0322586	0.09999	0.09999	0.0749632	0.302808	0.0419131	0.0411723	0.09999	0.0690634	0.0545214	0.0728749	0.0636715	0.144176	0.0749632	0.132409	0.10736	0.132409	0.0749632	0.132409	0.0411723	0.238225	0.182054	0.0636715	0.182054	0.0536287	0.0749632
Cockayne Syndrome	DOID:2962	0.0411723	0.0411723	0.0476199	NA	0.0411723	0.0476199	0.0476199	NA	0.0571439	0.0397384	0.0714299	0.0476199	0.0714299	0.0571439	NA	0.0476199	0.0571439	0.0476199	0.0476199	0.0571439	0.0367619	0.0571439	0.0476199	0.0571439	0.0571439	0.417263	0.0411723	0.0316203	0.421999	0.0571439	0.0418146	0.0714299	0.0412673	0.0411723	0.0476199	0.0933603	0.0714299	0.12825	0.0714299	0.0933603	0.0714299	0.659999	0.0476199	0.0933603	0.0411723	0.0933603	0.0367619	0.0933603
Carpal Tunnel Syndrome	DOID:12169	0.0411723	0.09999	0.212832	NA	0.0411723	0.115648	0.0476199	NA	0.0571439	0.177607	0.173473	0.212832	0.0714299	0.255398	NA	0.115648	0.255398	0.212832	0.212832	0.0571439	0.0367619	0.138778	0.0476199	0.138778	0.138778	0.0933603	0.09999	0.141323	0.0571439	0.138778	0.10155	0.0714299	0.304752	0.184015	0.115648	0.0933603	0.173473	0.12825	0.173473	0.0933603	0.173473	0.0571439	0.115648	0.226732	0.184015	0.417263	0.164303	0.0933603
Carcinoma, Adenoid Cystic	DOID:4866	0.163075	0.0220824	0.0280133	NA	0.163075	0.0280133	0.323547	NA	0.089279	0.0235373	0.049858	0.0280133	0.049858	0.0367619	NA	0.0280133	0.0367619	0.0280133	0.0280133	0.424592	0.133087	0.0367619	0.206874	0.0367619	0.0367619	0.0698989	0.0220824	0.0132837	0.0367619	0.0367619	0.0247223	0.049858	0.0268613	0.0220824	0.0280133	0.0698989	0.049858	0.101627	0.049858	0.0698989	0.049858	0.0367619	0.0280133	0.0698989	0.0220824	0.0698989	0.0180216	0.0698989
Dyskeratosis Congenita	DOID:2729	0.0545214	0.132409	0.148977	NA	0.0545214	0.148977	0.0613433	NA	0.0714299	0.12373	0.21027	0.148977	0.0865818	0.173473	NA	0.148977	0.173473	0.148977	0.148977	0.0714299	0.049858	0.173473	0.0613433	0.173473	0.173473	0.109892	0.132409	0.107888	0.0714299	0.173473	0.130357	0.0865818	0.12426	0.132409	0.148977	0.109892	0.21027	0.147106	0.21027	0.109892	0.639393	0.0714299	0.148977	0.811538	0.132409	0.266882	0.121084	0.109892
Skin Diseases, Vesiculobullous	DOID:2731	0.0545214	0.132409	0.148977	NA	0.0545214	0.148977	0.0613433	NA	0.0714299	0.12373	0.21027	0.148977	0.0865818	0.173473	NA	0.148977	0.173473	0.148977	0.148977	0.0714299	0.049858	0.173473	0.0613433	0.173473	0.173473	0.109892	0.132409	0.107888	0.0714299	0.173473	0.130357	0.0865818	0.12426	0.132409	0.148977	0.109892	0.21027	0.147106	0.21027	0.109892	0.639393	0.0714299	0.148977	0.811538	0.132409	0.266882	0.121084	0.109892
Ischemia	DOID:326	0.0545214	0.132409	0.148977	NA	0.0545214	0.274167	0.0613433	NA	0.0714299	0.12373	0.21027	0.148977	0.0865818	0.173473	NA	0.148977	0.173473	0.148977	0.148977	0.0714299	0.049858	0.173473	0.0613433	0.173473	0.173473	0.109892	0.402632	0.107888	0.0714299	0.173473	0.130357	0.0865818	0.12426	0.132409	0.274167	0.109892	0.21027	0.147106	0.21027	0.109892	0.21027	0.0714299	0.45301	0.266882	0.132409	0.266882	0.121084	0.109892
Synovitis	DOID:2703	0.0545214	0.402632	0.148977	NA	0.0545214	0.148977	0.0613433	NA	0.0714299	0.12373	0.21027	0.148977	0.0865818	0.173473	NA	0.148977	0.173473	0.148977	0.148977	0.0714299	0.049858	0.173473	0.0613433	0.173473	0.173473	0.109892	0.132409	0.107888	0.0714299	0.319248	0.130357	0.0865818	0.12426	0.132409	0.148977	0.109892	0.21027	0.147106	0.21027	0.109892	0.21027	0.0714299	0.148977	0.266882	0.132409	0.266882	0.121084	0.109892
Tauopathies	DOID:680	0.0411723	0.09999	0.833333	NA	0.0411723	0.115648	0.0476199	NA	0.0571439	0.177607	0.173473	0.212832	0.0714299	0.255398	NA	0.115648	0.255398	0.351665	0.212832	0.0571439	0.0367619	0.138778	0.0476199	0.138778	0.138778	0.0933603	0.09999	0.141323	0.0571439	0.138778	0.10155	0.0714299	0.402119	0.184015	0.115648	0.0933603	0.173473	0.12825	0.173473	0.0933603	0.173473	0.0571439	0.115648	0.226732	0.184015	0.417263	0.271481	0.0933603
Spinal Cord Diseases	DOID:319	0.0545214	0.132409	0.45301	NA	0.0545214	0.148977	0.0613433	NA	0.0714299	0.227704	0.21027	0.274167	0.0865818	0.319248	NA	0.148977	0.319248	0.45301	0.274167	0.0714299	0.049858	0.173473	0.0613433	0.173473	0.173473	0.109892	0.132409	0.198551	0.0714299	0.173473	0.130357	0.0865818	0.346526	0.243677	0.148977	0.109892	0.21027	0.147106	0.21027	0.109892	0.21027	0.0714299	0.148977	0.266882	0.243677	0.491152	0.368193	0.109892
Blindness, Cortical	DOID:11831	0.0220824	0.0536287	0.125202	NA	0.0220824	0.0680322	0.0280133	NA	0.0367619	0.383697	0.121084	0.490223	0.049858	0.164303	NA	0.0680322	0.164303	0.125202	0.490223	0.0367619	0.0180216	0.089279	0.0280133	0.089279	0.089279	0.0698989	0.0536287	0.23246	0.0367619	0.089279	0.0600399	0.049858	0.120054	0.386435	0.0680322	0.0698989	0.121084	0.101627	0.121084	0.0698989	0.121084	0.0367619	0.0680322	0.169754	0.255047	0.312405	0.0805457	0.0698989
Kartagener Syndrome	DOID:0050144	0.0322586	0.0322586	0.0384622	NA	0.0322586	0.0384622	0.0384622	NA	0.0476199	0.0321989	0.0613433	0.0384622	0.0613433	0.0476199	NA	0.0384622	0.0476199	0.0384622	0.0384622	0.0476199	0.0280133	0.0476199	0.0384622	0.0476199	0.0476199	0.368184	0.0322586	0.0230621	0.351665	0.0476199	0.0338527	0.0613433	0.0345777	0.0322586	0.0384622	0.0823791	0.0613433	0.115769	0.0613433	0.0823791	0.0613433	0.549999	0.0384622	0.0823791	0.0322586	0.0823791	0.0280133	0.0823791
Pyruvate Dehydrogenase Complex Deficiency Disease	DOID:3649	0.0545214	0.0545214	0.0613433	NA	0.0545214	0.0613433	0.0613433	NA	0.0714299	0.0509475	0.0865818	0.0613433	0.0865818	0.0714299	NA	0.0613433	0.0714299	0.0613433	0.0613433	0.0714299	0.049858	0.0714299	0.0613433	0.0714299	0.0714299	0.109892	0.0545214	0.0444246	0.0714299	0.0714299	0.0536764	0.386968	0.051166	0.0545214	0.0613433	0.109892	0.0865818	0.147106	0.0865818	0.491152	0.0865818	0.0714299	0.0613433	0.109892	0.0545214	0.109892	0.049858	0.491152
Skin Diseases, Vascular	DOID:9540	0.0545214	0.132409	0.148977	NA	0.0545214	0.148977	0.0613433	NA	0.0714299	0.12373	0.21027	0.148977	0.0865818	0.173473	NA	0.148977	0.173473	0.148977	0.148977	0.0714299	0.049858	0.173473	0.0613433	0.173473	0.173473	0.109892	0.132409	0.107888	0.0714299	0.173473	0.130357	0.0865818	0.12426	0.132409	0.148977	0.109892	0.21027	0.147106	0.21027	0.109892	0.639393	0.0714299	0.148977	0.811538	0.132409	0.266882	0.121084	0.109892
Huntington Disease	DOID:12858	0.0318791	0.0774206	0.42454	NA	0.0318791	0.0892681	0.0367575	NA	0.0439086	0.142472	0.132392	0.164283	0.0545145	0.196245	NA	0.0892681	0.196245	0.271448	0.164283	0.0439086	0.0285246	0.106635	0.0367575	0.106635	0.106635	0.315177	0.0774206	0.109929	0.507135	0.106635	0.0806277	0.0545145	0.330234	0.14248	0.0892681	0.070519	0.132392	0.0953135	0.132392	0.070519	0.132392	0.324258	0.0892681	0.17126	0.14248	0.315177	0.21065	0.070519
Fibrosarcoma	DOID:3355	0.564516	0.0322586	0.0384622	NA	0.564516	0.0384622	0.284037	NA	0.115648	0.0321989	0.0613433	0.0384622	0.0613433	0.0476199	NA	0.0384622	0.0476199	0.0384622	0.0384622	0.351665	0.206874	0.0476199	0.284037	0.0476199	0.0476199	0.0823791	0.0322586	0.0230621	0.0476199	0.0476199	0.0338527	0.0613433	0.0345777	0.0322586	0.0384622	0.0823791	0.0613433	0.115769	0.0613433	0.0823791	0.0613433	0.0476199	0.0384622	0.0823791	0.0322586	0.0823791	0.0280133	0.0823791
Dry Eye Syndromes	DOID:10140	0.0262177	0.0636715	0.144176	NA	0.0262177	0.0783424	0.0322586	NA	0.0411723	0.445196	0.132409	0.564516	0.0545214	0.184015	NA	0.0783424	0.184015	0.144176	0.564516	0.0411723	0.0220824	0.09999	0.0322586	0.09999	0.09999	0.0749632	0.0636715	0.302016	0.0411723	0.09999	0.0690634	0.0545214	0.134114	0.458801	0.0783424	0.0749632	0.132409	0.10736	0.132409	0.0749632	0.132409	0.0411723	0.0783424	0.182054	0.302808	0.33504	0.0986948	0.0749632
Williams Syndrome	DOID:1928	0.0749632	0.0749632	0.0823791	NA	0.0749632	0.0823791	0.0823791	NA	0.0933603	0.0679241	0.109892	0.0823791	0.109892	0.0933603	NA	0.0823791	0.0933603	0.0823791	0.0823791	0.0933603	0.0698989	0.0933603	0.0823791	0.0933603	0.0933603	0.328859	0.0749632	0.0640035	0.226732	0.0933603	0.0716984	0.109892	0.066053	0.0749632	0.0823791	0.135413	0.109892	0.176371	0.109892	0.135413	0.109892	0.226732	0.0823791	0.135413	0.0749632	0.135413	0.0698989	0.135413
Hemorrhagic Disorders	DOID:2213	0.0411723	0.09999	0.115648	NA	0.0411723	0.115648	0.0476199	NA	0.0571439	0.0965077	0.173473	0.115648	0.0714299	0.138778	NA	0.115648	0.138778	0.115648	0.115648	0.0571439	0.0367619	0.138778	0.0476199	0.138778	0.138778	0.0933603	0.09999	0.0767921	0.0571439	0.138778	0.308794	0.0714299	0.10022	0.09999	0.115648	0.0933603	0.173473	0.12825	0.173473	0.0933603	0.173473	0.0571439	0.115648	0.226732	0.09999	0.226732	0.089279	0.0933603
Klinefelter Syndrome	DOID:1921	0.0749632	0.0749632	0.0823791	NA	0.0749632	0.0823791	0.0823791	NA	0.0933603	0.0679241	0.109892	0.0823791	0.109892	0.0933603	NA	0.0823791	0.0933603	0.0823791	0.0823791	0.0933603	0.0698989	0.0933603	0.0823791	0.0933603	0.0933603	0.328859	0.0749632	0.0640035	0.226732	0.0933603	0.0716984	0.109892	0.066053	0.0749632	0.0823791	0.135413	0.109892	0.176371	0.109892	0.135413	0.109892	0.226732	0.0823791	0.135413	0.0749632	0.135413	0.0698989	0.135413
Magnesium Deficiency	DOID:13581	NA	NA	NA	NA	NA	NA	NA	NA	NA	NA	NA	NA	NA	NA	NA	NA	NA	NA	NA	NA	NA	NA	NA	NA	NA	NA	NA	NA	NA	NA	NA	NA	NA	NA	NA	NA	NA	NA	NA	NA	NA	NA	NA	NA	NA	NA	NA	NA
Kidney Diseases, Cystic	DOID:2975	0.0545214	0.132409	0.148977	NA	0.0545214	0.148977	0.0613433	NA	0.0714299	0.12373	0.21027	0.148977	0.0865818	0.173473	NA	0.148977	0.173473	0.148977	0.148977	0.0714299	0.049858	0.173473	0.0613433	0.173473	0.173473	0.109892	0.132409	0.107888	0.0714299	0.173473	0.130357	0.0865818	0.12426	0.132409	0.148977	0.109892	0.21027	0.147106	0.21027	0.109892	0.21027	0.0714299	0.148977	0.266882	0.132409	0.266882	0.121084	0.109892
Spasms, Infantile	DOID:2481	0.0262177	0.0636715	0.238225	NA	0.0262177	0.0783424	0.0322586	NA	0.0411723	0.12096	0.132409	0.144176	0.0545214	0.184015	NA	0.0783424	0.184015	0.37258	0.144176	0.0411723	0.0220824	0.09999	0.0322586	0.09999	0.09999	0.0749632	0.0636715	0.0771343	0.0411723	0.09999	0.0690634	0.0545214	0.191655	0.117177	0.0783424	0.0749632	0.132409	0.10736	0.132409	0.0749632	0.132409	0.0411723	0.0783424	0.182054	0.117177	0.33504	0.386435	0.0749632
Blood Protein Disorders	DOID:620	0.0545214	0.132409	0.148977	NA	0.0545214	0.148977	0.0613433	NA	0.0714299	0.12373	0.21027	0.148977	0.0865818	0.173473	NA	0.148977	0.173473	0.148977	0.148977	0.0714299	0.049858	0.173473	0.0613433	0.173473	0.173473	0.109892	0.132409	0.107888	0.0714299	0.173473	0.61995	0.0865818	0.12426	0.132409	0.148977	0.109892	0.21027	0.147106	0.21027	0.109892	0.21027	0.0714299	0.148977	0.266882	0.132409	0.266882	0.121084	0.109892
Afibrinogenemia	DOID:2236	0.0322586	0.0783424	0.0934083	NA	0.0322586	0.0934083	0.0384622	NA	0.0476199	0.0781974	0.148977	0.0934083	0.0613433	0.115648	NA	0.0934083	0.115648	0.0934083	0.0934083	0.0476199	0.0280133	0.115648	0.0384622	0.115648	0.115648	0.0823791	0.0783424	0.056008	0.0476199	0.115648	0.249997	0.0613433	0.0839745	0.0783424	0.0934083	0.0823791	0.148977	0.115769	0.148977	0.0823791	0.148977	0.0476199	0.0934083	0.200064	0.0783424	0.200064	0.0680322	0.0823791
Rothmund-Thomson Syndrome	DOID:2732	0.0545214	0.132409	0.148977	NA	0.0545214	0.148977	0.0613433	NA	0.0714299	0.12373	0.21027	0.148977	0.0865818	0.173473	NA	0.148977	0.173473	0.148977	0.148977	0.0714299	0.049858	0.173473	0.0613433	0.173473	0.173473	0.109892	0.132409	0.107888	0.0714299	0.173473	0.130357	0.0865818	0.12426	0.132409	0.148977	0.109892	0.21027	0.147106	0.21027	0.109892	0.639393	0.0714299	0.148977	0.811538	0.132409	0.266882	0.121084	0.109892
Fragile X Syndrome	DOID:14261	0.041946	0.0884832	0.443394	NA	0.041946	0.100712	0.0470412	NA	0.0545145	0.153384	0.145273	0.177385	0.0656074	0.21027	NA	0.100712	0.21027	0.286918	0.177385	0.0545145	0.0384438	0.118649	0.0470412	0.118649	0.118649	0.368135	0.0884832	0.121512	0.243646	0.118649	0.09077	0.0656074	0.343314	0.154965	0.100712	0.0823681	0.145273	0.108385	0.145273	0.0823681	0.145273	0.243646	0.100712	0.185501	0.154965	0.332834	0.224521	0.0823681
Exanthema	DOID:0050486	0.0545214	0.132409	0.148977	NA	0.0545214	0.148977	0.0613433	NA	0.0714299	0.12373	0.21027	0.148977	0.0865818	0.173473	NA	0.148977	0.173473	0.148977	0.148977	0.0714299	0.049858	0.173473	0.0613433	0.173473	0.173473	0.109892	0.132409	0.107888	0.0714299	0.173473	0.130357	0.0865818	0.12426	0.132409	0.148977	0.109892	0.21027	0.147106	0.21027	0.109892	0.639393	0.0714299	0.148977	0.811538	0.132409	0.266882	0.121084	0.109892
Hyperglycemia	DOID:4195	0.0411723	0.0411723	0.0476199	NA	0.0411723	0.0476199	0.0476199	NA	0.0571439	0.0397384	0.0714299	0.0476199	0.0714299	0.0571439	NA	0.0476199	0.0571439	0.0476199	0.0476199	0.0571439	0.0367619	0.0571439	0.0476199	0.0571439	0.0571439	0.0933603	0.0411723	0.0316203	0.0571439	0.0571439	0.0418146	0.173473	0.0412673	0.0411723	0.0476199	0.0933603	0.0714299	0.12825	0.0714299	0.226732	0.0714299	0.0571439	0.0476199	0.0933603	0.0411723	0.0933603	0.0367619	0.226732
Anemia, Diamond-Blackfan	DOID:1339	0.0262177	0.0636715	0.0783424	NA	0.0262177	0.0783424	0.0322586	NA	0.0411723	0.065727	0.132409	0.0783424	0.0545214	0.09999	NA	0.0783424	0.09999	0.0783424	0.0783424	0.0411723	0.0220824	0.09999	0.0322586	0.09999	0.09999	0.0749632	0.0636715	0.0419131	0.0411723	0.09999	0.210009	0.0545214	0.0728749	0.0636715	0.0783424	0.0749632	0.132409	0.10736	0.132409	0.0749632	0.132409	0.0411723	0.0783424	0.182054	0.0636715	0.182054	0.0536287	0.0749632
Nephrocalcinosis	DOID:12679	0.0410485	0.0996893	0.111773	NA	0.0410485	0.111773	0.046024	NA	0.0533176	0.096933	0.155756	0.111773	0.0641347	0.129486	NA	0.111773	0.129486	0.111773	0.111773	0.0533176	0.0376273	0.129486	0.046024	0.129486	0.129486	0.0804579	0.0996893	0.0816495	0.0533176	0.129486	0.100954	0.132392	0.0999411	0.0996893	0.111773	0.0804579	0.155756	0.105746	0.155756	0.17126	0.155756	0.0533176	0.111773	0.195398	0.0996893	0.195398	0.0913805	0.17126
Thyrotoxicosis	DOID:7997	0.0545214	0.132409	0.148977	NA	0.0545214	0.148977	0.0613433	NA	0.0714299	0.12373	0.21027	0.148977	0.0865818	0.173473	NA	0.148977	0.173473	0.148977	0.148977	0.0714299	0.049858	0.319248	0.0613433	0.173473	0.319248	0.109892	0.132409	0.107888	0.0714299	0.173473	0.130357	0.0865818	0.12426	0.132409	0.148977	0.109892	0.386968	0.147106	0.386968	0.109892	0.21027	0.0714299	0.148977	0.266882	0.132409	0.266882	0.121084	0.109892
Peripheral Nervous System Diseases	DOID:574	0.0749632	0.182054	0.368184	NA	0.0749632	0.200064	0.0823791	NA	0.0933603	0.303579	0.266882	0.368184	0.109892	0.417263	NA	0.200064	0.417263	0.368184	0.368184	0.0933603	0.0698989	0.226732	0.0823791	0.226732	0.226732	0.135413	0.182054	0.286057	0.0933603	0.226732	0.174125	0.109892	0.487791	0.33504	0.200064	0.135413	0.266882	0.176371	0.266882	0.135413	0.266882	0.0933603	0.200064	0.328859	0.33504	0.605211	0.312405	0.135413
Mastocytosis, Systemic	DOID:349	0.0322586	0.0783424	0.0934083	NA	0.0322586	0.0934083	0.0384622	NA	0.0476199	0.0781974	0.148977	0.0934083	0.0613433	0.115648	NA	0.0934083	0.115648	0.0934083	0.0934083	0.0476199	0.0280133	0.115648	0.0384622	0.115648	0.115648	0.0823791	0.0783424	0.056008	0.0476199	0.115648	0.249997	0.0613433	0.0839745	0.0783424	0.0934083	0.0823791	0.148977	0.115769	0.148977	0.0823791	0.148977	0.0476199	0.0934083	0.200064	0.0783424	0.200064	0.0680322	0.0823791
Prion Diseases	DOID:649	0.0411723	0.09999	0.351665	NA	0.0411723	0.115648	0.0476199	NA	0.0571439	0.177607	0.173473	0.212832	0.0714299	0.255398	NA	0.115648	0.255398	0.833333	0.212832	0.0571439	0.0367619	0.138778	0.0476199	0.138778	0.138778	0.0933603	0.09999	0.141323	0.0571439	0.138778	0.10155	0.0714299	0.274072	0.184015	0.115648	0.0933603	0.173473	0.12825	0.173473	0.0933603	0.173473	0.0571439	0.115648	0.226732	0.184015	0.417263	0.424592	0.0933603
Gitelman Syndrome	DOID:0050450	0.0411723	0.09999	0.115648	NA	0.0411723	0.115648	0.0476199	NA	0.0571439	0.0965077	0.173473	0.115648	0.0714299	0.138778	NA	0.115648	0.138778	0.115648	0.115648	0.0571439	0.0367619	0.138778	0.0476199	0.138778	0.138778	0.0933603	0.09999	0.0767921	0.0571439	0.138778	0.10155	0.0714299	0.10022	0.09999	0.115648	0.0933603	0.173473	0.12825	0.173473	0.0933603	0.173473	0.0571439	0.115648	0.226732	0.09999	0.226732	0.089279	0.0933603
Klippel-Feil Syndrome	DOID:10426	0.10736	0.10736	0.115769	NA	0.10736	0.115769	0.115769	NA	0.12825	0.0943727	0.147106	0.115769	0.147106	0.12825	NA	0.115769	0.12825	0.115769	0.115769	0.12825	0.101627	0.12825	0.115769	0.12825	0.12825	0.176371	0.10736	0.094962	0.12825	0.12825	0.0999124	0.147106	0.0889973	0.10736	0.115769	0.176371	0.147106	0.223744	0.147106	0.176371	0.147106	0.12825	0.115769	0.176371	0.10736	0.176371	0.101627	0.176371
Neuromuscular Diseases	DOID:440	0.0545214	0.132409	0.274167	NA	0.0545214	0.148977	0.0613433	NA	0.0714299	0.227704	0.21027	0.274167	0.0865818	0.825	NA	0.148977	0.527499	0.274167	0.274167	0.0714299	0.049858	0.173473	0.0613433	0.173473	0.173473	0.109892	0.132409	0.198551	0.0714299	0.173473	0.130357	0.0865818	0.377853	0.243677	0.148977	0.109892	0.21027	0.147106	0.21027	0.109892	0.21027	0.0714299	0.148977	0.266882	0.243677	0.491152	0.222835	0.109892
Multiple Endocrine Neoplasia Type 2a	DOID:0050430	0.0411723	0.0411723	0.0476199	NA	0.0411723	0.0476199	0.0476199	NA	0.0571439	0.0397384	0.0714299	0.0476199	0.0714299	0.0571439	NA	0.0476199	0.0571439	0.0476199	0.0476199	0.0571439	0.0367619	0.0571439	0.0476199	0.0571439	0.0571439	0.417263	0.0411723	0.0316203	0.659999	0.0571439	0.0418146	0.0714299	0.0412673	0.0411723	0.0476199	0.0933603	0.0714299	0.12825	0.0714299	0.0933603	0.0714299	0.421999	0.0476199	0.0933603	0.0411723	0.0933603	0.0367619	0.0933603
Legionnaires' Disease	DOID:10457	0.0411723	0.0411723	0.0476199	NA	0.0411723	0.0476199	0.0476199	NA	0.0571439	0.0397384	0.0714299	0.0476199	0.0714299	0.0571439	NA	0.0476199	0.0571439	0.0476199	0.0476199	0.0571439	0.0367619	0.0571439	0.0476199	0.0571439	0.0571439	0.0933603	0.0411723	0.0316203	0.0571439	0.0571439	0.0418146	0.0714299	0.0412673	0.0411723	0.0476199	0.226732	0.0714299	0.12825	0.0714299	0.0933603	0.0714299	0.0571439	0.0476199	0.0933603	0.0411723	0.0933603	0.0367619	0.0933603
Adrenal Insufficiency	DOID:0050546	0.0545214	0.132409	0.148977	NA	0.0545214	0.148977	0.0613433	NA	0.0714299	0.12373	0.21027	0.148977	0.0865818	0.173473	NA	0.148977	0.173473	0.148977	0.148977	0.0714299	0.049858	0.527499	0.0613433	0.173473	0.319248	0.109892	0.132409	0.107888	0.0714299	0.173473	0.130357	0.0865818	0.12426	0.132409	0.148977	0.109892	0.386968	0.147106	0.639393	0.109892	0.21027	0.0714299	0.148977	0.266882	0.132409	0.266882	0.121084	0.109892
Color Vision Defects	DOID:11661	0.0192322	0.0467067	0.112127	NA	0.0192322	0.0609274	0.0250878	NA	0.0337236	0.480502	0.113285	0.439028	0.0466468	0.150724	NA	0.0609274	0.150724	0.112127	0.439028	0.0337236	0.0152224	0.0819002	0.0250878	0.0819002	0.0819002	0.0664141	0.0467067	0.274121	0.0337236	0.0819002	0.0538103	0.0466468	0.110325	0.336557	0.0609274	0.0664141	0.113285	0.0976859	0.113285	0.0664141	0.113285	0.0337236	0.0609274	0.161291	0.222127	0.29683	0.0680347	0.0664141
Adenoma, Oxyphilic	DOID:5389	0.09999	0.0411723	0.0476199	NA	0.09999	0.0476199	0.115648	NA	0.659999	0.0397384	0.0714299	0.0476199	0.0714299	0.0571439	NA	0.0476199	0.0571439	0.0476199	0.0476199	0.138778	0.089279	0.0571439	0.115648	0.0571439	0.0571439	0.0933603	0.0411723	0.0316203	0.0571439	0.0571439	0.0418146	0.0714299	0.0412673	0.0411723	0.0476199	0.0933603	0.0714299	0.12825	0.0714299	0.0933603	0.0714299	0.0571439	0.0476199	0.0933603	0.0411723	0.0933603	0.0367619	0.0933603
Werner Syndrome	DOID:5688	0.0411723	0.0411723	0.0476199	NA	0.0411723	0.0476199	0.0476199	NA	0.0571439	0.0397384	0.0714299	0.0476199	0.0714299	0.0571439	NA	0.0476199	0.0571439	0.0476199	0.0476199	0.0571439	0.0367619	0.0571439	0.0476199	0.0571439	0.0571439	0.417263	0.0411723	0.0316203	0.421999	0.0571439	0.0418146	0.0714299	0.0412673	0.0411723	0.0476199	0.0933603	0.0714299	0.12825	0.0714299	0.0933603	0.0714299	0.659999	0.0476199	0.0933603	0.0411723	0.0933603	0.0367619	0.0933603
Spinocerebellar Ataxias	DOID:1441	0.0322586	0.0783424	0.44423	NA	0.0322586	0.0934083	0.0384622	NA	0.0476199	0.143909	0.148977	0.171903	0.0613433	0.212832	NA	0.0934083	0.212832	0.284037	0.171903	0.0476199	0.0280133	0.115648	0.0384622	0.115648	0.115648	0.0823791	0.0783424	0.103074	0.0476199	0.115648	0.0822137	0.0613433	0.325918	0.144176	0.0934083	0.0823791	0.148977	0.115769	0.148977	0.0823791	0.148977	0.0476199	0.0934083	0.200064	0.144176	0.368184	0.206874	0.0823791
Immune Complex Diseases	DOID:1557	0.0545214	0.132409	0.148977	NA	0.0545214	0.148977	0.0613433	NA	0.0714299	0.12373	0.21027	0.148977	0.0865818	0.173473	NA	0.148977	0.173473	0.148977	0.148977	0.0714299	0.049858	0.173473	0.0613433	0.173473	0.173473	0.109892	0.132409	0.107888	0.0714299	0.173473	0.239901	0.0865818	0.12426	0.132409	0.148977	0.109892	0.21027	0.147106	0.21027	0.109892	0.21027	0.0714299	0.148977	0.266882	0.132409	0.266882	0.121084	0.109892
Facial Dermatoses	DOID:3134	0.0545214	0.132409	0.148977	NA	0.0545214	0.148977	0.0613433	NA	0.0714299	0.12373	0.21027	0.148977	0.0865818	0.173473	NA	0.148977	0.173473	0.148977	0.148977	0.0714299	0.049858	0.173473	0.0613433	0.173473	0.173473	0.109892	0.132409	0.107888	0.0714299	0.173473	0.130357	0.0865818	0.12426	0.132409	0.148977	0.109892	0.21027	0.147106	0.21027	0.109892	0.639393	0.0714299	0.148977	0.811538	0.132409	0.266882	0.121084	0.109892
Cholangitis, Sclerosing	DOID:14268	0.0262177	0.0636715	0.0783424	NA	0.0262177	0.0783424	0.0322586	NA	0.0411723	0.065727	0.243677	0.0783424	0.0545214	0.09999	NA	0.0783424	0.09999	0.0783424	0.0783424	0.0411723	0.0220824	0.09999	0.0322586	0.09999	0.09999	0.0749632	0.0636715	0.0419131	0.0411723	0.09999	0.0690634	0.0545214	0.0728749	0.0636715	0.0783424	0.0749632	0.132409	0.10736	0.132409	0.0749632	0.132409	0.0411723	0.0783424	0.182054	0.0636715	0.182054	0.0536287	0.0749632
Epilepsy, Complex Partial	DOID:12382	0.0262177	0.0636715	0.238225	NA	0.0262177	0.0783424	0.0322586	NA	0.0411723	0.12096	0.132409	0.144176	0.0545214	0.184015	NA	0.0783424	0.184015	0.37258	0.144176	0.0411723	0.0220824	0.09999	0.0322586	0.09999	0.09999	0.0749632	0.0636715	0.0771343	0.0411723	0.09999	0.0690634	0.0545214	0.191655	0.117177	0.0783424	0.0749632	0.132409	0.10736	0.132409	0.0749632	0.132409	0.0411723	0.0783424	0.182054	0.117177	0.33504	0.386435	0.0749632
Niemann-Pick Diseases	DOID:14504	0.0245669	0.0596625	0.0709085	NA	0.0245669	0.0709085	0.0291976	NA	0.0359795	0.061785	0.111773	0.0709085	0.046024	0.0873788	NA	0.0709085	0.0873788	0.0709085	0.0709085	0.0359795	0.0213808	0.0873788	0.0291976	0.0873788	0.0873788	0.0611509	0.0596625	0.0428574	0.0359795	0.0873788	0.11827	0.205699	0.0679999	0.0596625	0.0709085	0.0611509	0.111773	0.0845132	0.111773	0.273307	0.111773	0.0359795	0.0709085	0.148509	0.0596625	0.148509	0.0519248	0.273307
Tuberous Sclerosis	DOID:13515	0.0411723	0.0411723	0.0476199	NA	0.0411723	0.0476199	0.0476199	NA	0.0571439	0.0397384	0.0714299	0.0476199	0.0714299	0.0571439	NA	0.0476199	0.0571439	0.0476199	0.0476199	0.0571439	0.0367619	0.0571439	0.0476199	0.0571439	0.0571439	0.417263	0.0411723	0.0316203	0.659999	0.0571439	0.0418146	0.0714299	0.0412673	0.0411723	0.0476199	0.0933603	0.0714299	0.12825	0.0714299	0.0933603	0.0714299	0.421999	0.0476199	0.0933603	0.0411723	0.0933603	0.0367619	0.0933603
Diabetic Neuropathies	DOID:9743	0.0545214	0.132409	0.274167	NA	0.0545214	0.148977	0.0613433	NA	0.0714299	0.227704	0.21027	0.274167	0.0865818	0.527499	NA	0.148977	0.527499	0.274167	0.274167	0.0714299	0.049858	0.173473	0.0613433	0.173473	0.173473	0.109892	0.132409	0.198551	0.0714299	0.173473	0.130357	0.0865818	0.377853	0.243677	0.148977	0.109892	0.21027	0.147106	0.21027	0.109892	0.21027	0.0714299	0.148977	0.266882	0.243677	0.491152	0.222835	0.109892
Aortic Aneurysm, Thoracic	DOID:14004	0.0262177	0.0636715	0.0783424	NA	0.0262177	0.144176	0.0322586	NA	0.0411723	0.065727	0.132409	0.0783424	0.0545214	0.09999	NA	0.0783424	0.09999	0.0783424	0.0783424	0.0411723	0.0220824	0.09999	0.0322586	0.09999	0.09999	0.0749632	0.302808	0.0419131	0.0411723	0.09999	0.0690634	0.0545214	0.0728749	0.0636715	0.144176	0.0749632	0.132409	0.10736	0.132409	0.0749632	0.132409	0.0411723	0.238225	0.182054	0.0636715	0.182054	0.0536287	0.0749632
Acanthosis Nigricans	DOID:3138	0.0411723	0.09999	0.115648	NA	0.0411723	0.115648	0.0476199	NA	0.0571439	0.0965077	0.173473	0.115648	0.0714299	0.138778	NA	0.115648	0.138778	0.115648	0.115648	0.0571439	0.0367619	0.138778	0.0476199	0.138778	0.138778	0.0933603	0.09999	0.0767921	0.0571439	0.138778	0.10155	0.0714299	0.10022	0.09999	0.115648	0.0933603	0.173473	0.12825	0.173473	0.0933603	0.527499	0.0571439	0.115648	0.689451	0.09999	0.226732	0.089279	0.0933603
DiGeorge Syndrome	DOID:11198	0.0411723	0.09999	0.115648	NA	0.0411723	0.115648	0.0476199	NA	0.0571439	0.0965077	0.173473	0.115648	0.0714299	0.138778	NA	0.115648	0.138778	0.115648	0.115648	0.0571439	0.0367619	0.138778	0.0476199	0.138778	0.138778	0.0933603	0.09999	0.0767921	0.0571439	0.138778	0.308794	0.0714299	0.10022	0.09999	0.115648	0.0933603	0.173473	0.12825	0.173473	0.0933603	0.173473	0.0571439	0.115648	0.226732	0.09999	0.226732	0.089279	0.0933603
Retinal Detachment	DOID:5327	0.0262177	0.0636715	0.144176	NA	0.0262177	0.0783424	0.0322586	NA	0.0411723	0.634641	0.132409	0.564516	0.0545214	0.184015	NA	0.0783424	0.184015	0.144176	0.564516	0.0411723	0.0220824	0.09999	0.0322586	0.09999	0.09999	0.0749632	0.0636715	0.448709	0.0411723	0.09999	0.0690634	0.0545214	0.134114	0.458801	0.0783424	0.0749632	0.132409	0.10736	0.132409	0.0749632	0.132409	0.0411723	0.0783424	0.182054	0.302808	0.33504	0.0986948	0.0749632
Nasopharyngeal Neoplasms	DOID:9261	0.238225	0.0322586	0.0384622	NA	0.238225	0.0384622	0.44423	NA	0.115648	0.0321989	0.0613433	0.0384622	0.0613433	0.0476199	NA	0.0384622	0.0476199	0.0384622	0.0384622	0.549999	0.206874	0.0476199	0.284037	0.0476199	0.0476199	0.0823791	0.0322586	0.0230621	0.0476199	0.0476199	0.0338527	0.0613433	0.0345777	0.0322586	0.0384622	0.0823791	0.0613433	0.115769	0.0613433	0.0823791	0.0613433	0.0476199	0.0384622	0.0823791	0.0322586	0.0823791	0.0280133	0.0823791
Oligospermia	DOID:14228	0.0411723	0.09999	0.115648	NA	0.0411723	0.115648	0.0476199	NA	0.0571439	0.0965077	0.173473	0.115648	0.0714299	0.138778	NA	0.115648	0.138778	0.115648	0.115648	0.0571439	0.0367619	0.138778	0.0476199	0.138778	0.138778	0.0933603	0.09999	0.0767921	0.0571439	0.138778	0.10155	0.0714299	0.10022	0.09999	0.115648	0.0933603	0.173473	0.12825	0.173473	0.0933603	0.173473	0.0571439	0.115648	0.226732	0.09999	0.226732	0.089279	0.0933603
Pantothenate Kinase-Associated Neurodegeneration	DOID:3981	0.0411723	0.09999	0.549999	NA	0.0411723	0.115648	0.0476199	NA	0.0571439	0.177607	0.173473	0.212832	0.0714299	0.255398	NA	0.115648	0.255398	0.351665	0.212832	0.0571439	0.0367619	0.138778	0.0476199	0.138778	0.138778	0.0933603	0.09999	0.141323	0.0571439	0.138778	0.10155	0.0714299	0.402119	0.184015	0.115648	0.0933603	0.173473	0.12825	0.173473	0.0933603	0.173473	0.0571439	0.115648	0.226732	0.184015	0.417263	0.271481	0.0933603
Hallermann's Syndrome	DOID:4534	0.10736	0.10736	0.115769	NA	0.10736	0.115769	0.115769	NA	0.12825	0.0943727	0.147106	0.115769	0.147106	0.12825	NA	0.115769	0.12825	0.115769	0.115769	0.12825	0.101627	0.12825	0.115769	0.12825	0.12825	0.176371	0.10736	0.094962	0.12825	0.12825	0.0999124	0.147106	0.0889973	0.10736	0.115769	0.176371	0.147106	0.543379	0.147106	0.176371	0.147106	0.12825	0.115769	0.176371	0.10736	0.176371	0.101627	0.176371
Conjunctivitis	DOID:6195	0.0262177	0.0636715	0.144176	NA	0.0262177	0.0783424	0.0322586	NA	0.0411723	0.445196	0.132409	0.564516	0.0545214	0.184015	NA	0.0783424	0.184015	0.144176	0.564516	0.0411723	0.0220824	0.09999	0.0322586	0.09999	0.09999	0.0749632	0.0636715	0.302016	0.0411723	0.09999	0.0690634	0.0545214	0.134114	0.681648	0.0783424	0.0749632	0.132409	0.10736	0.132409	0.0749632	0.132409	0.0411723	0.0783424	0.182054	0.302808	0.33504	0.0986948	0.0749632
Muscular Dystrophy, Duchenne	DOID:11723	0.0262177	0.117177	0.0783424	NA	0.0262177	0.0783424	0.0322586	NA	0.0411723	0.065727	0.132409	0.0783424	0.0545214	0.09999	NA	0.0783424	0.09999	0.0783424	0.0783424	0.0411723	0.0220824	0.09999	0.0322586	0.09999	0.09999	0.0749632	0.0636715	0.0419131	0.0411723	0.720502	0.0690634	0.0545214	0.0728749	0.0636715	0.0783424	0.0749632	0.132409	0.10736	0.132409	0.0749632	0.132409	0.0411723	0.0783424	0.182054	0.0636715	0.182054	0.0536287	0.0749632
Protein-Losing Enteropathies	DOID:10611	0.0545214	0.132409	0.148977	NA	0.0545214	0.148977	0.0613433	NA	0.0714299	0.12373	0.639393	0.148977	0.0865818	0.173473	NA	0.148977	0.173473	0.148977	0.148977	0.0714299	0.049858	0.173473	0.0613433	0.173473	0.173473	0.109892	0.132409	0.107888	0.0714299	0.173473	0.130357	0.0865818	0.12426	0.132409	0.148977	0.109892	0.21027	0.147106	0.21027	0.109892	0.21027	0.0714299	0.148977	0.266882	0.132409	0.266882	0.121084	0.109892
Carcinoma, Non-Small-Cell Lung	DOID:3908	0.193613	0.0262177	0.0322586	NA	0.193613	0.0322586	0.238225	NA	0.09999	0.0270641	0.0545214	0.0322586	0.0545214	0.0411723	NA	0.0322586	0.0411723	0.0322586	0.0322586	0.304051	0.163075	0.0411723	0.238225	0.0411723	0.0411723	0.0749632	0.0262177	0.0172584	0.0411723	0.0411723	0.0284379	0.0545214	0.0300073	0.0262177	0.0322586	0.0749632	0.0545214	0.10736	0.0545214	0.0749632	0.0545214	0.0411723	0.0322586	0.0749632	0.0262177	0.0749632	0.0220824	0.0749632
Hypertension	DOID:10763	0.0411723	0.09999	0.115648	NA	0.0411723	0.212832	0.0476199	NA	0.0571439	0.0965077	0.173473	0.115648	0.0714299	0.138778	NA	0.115648	0.138778	0.115648	0.115648	0.0571439	0.0367619	0.138778	0.0476199	0.138778	0.138778	0.0933603	0.475531	0.0767921	0.0571439	0.138778	0.10155	0.0714299	0.10022	0.09999	0.212832	0.0933603	0.173473	0.12825	0.173473	0.0933603	0.173473	0.0571439	0.351665	0.226732	0.09999	0.226732	0.089279	0.0933603
Osteosclerosis	DOID:4254	0.0322586	0.37258	0.0934083	NA	0.0322586	0.0934083	0.0384622	NA	0.0476199	0.0781974	0.148977	0.0934083	0.0613433	0.115648	NA	0.0934083	0.115648	0.0934083	0.0934083	0.0476199	0.0280133	0.115648	0.0384622	0.115648	0.115648	0.0823791	0.0783424	0.056008	0.0476199	0.212832	0.0822137	0.0613433	0.0839745	0.0783424	0.0934083	0.0823791	0.148977	0.115769	0.148977	0.0823791	0.148977	0.0476199	0.0934083	0.200064	0.0783424	0.200064	0.0680322	0.0823791
Neoplasms, Squamous Cell	DOID:1749	0.184015	0.0411723	0.0476199	NA	0.184015	0.0476199	0.212832	NA	0.138778	0.0397384	0.0714299	0.0476199	0.0714299	0.0571439	NA	0.0476199	0.0571439	0.0476199	0.0476199	0.255398	0.164303	0.0571439	0.212832	0.0571439	0.0571439	0.0933603	0.0411723	0.0316203	0.0571439	0.0571439	0.0418146	0.0714299	0.0412673	0.0411723	0.0476199	0.0933603	0.0714299	0.12825	0.0714299	0.0933603	0.0714299	0.0571439	0.0476199	0.0933603	0.0411723	0.0933603	0.0367619	0.0933603
Spinocerebellar Degenerations	DOID:9277	0.0322586	0.0783424	0.44423	NA	0.0322586	0.0934083	0.0384622	NA	0.0476199	0.143909	0.148977	0.171903	0.0613433	0.212832	NA	0.0934083	0.212832	0.284037	0.171903	0.0476199	0.0280133	0.115648	0.0384622	0.115648	0.115648	0.0823791	0.0783424	0.103074	0.0476199	0.115648	0.0822137	0.0613433	0.325918	0.144176	0.0934083	0.0823791	0.148977	0.115769	0.148977	0.0823791	0.148977	0.0476199	0.0934083	0.200064	0.144176	0.368184	0.206874	0.0823791
Herpes Simplex	DOID:8566	0.0749632	0.0749632	0.0823791	NA	0.0749632	0.0823791	0.0823791	NA	0.0933603	0.0679241	0.109892	0.0823791	0.109892	0.0933603	NA	0.0823791	0.0933603	0.0823791	0.0823791	0.0933603	0.0698989	0.0933603	0.0823791	0.0933603	0.0933603	0.135413	0.0749632	0.0640035	0.0933603	0.0933603	0.0716984	0.109892	0.066053	0.0749632	0.0823791	0.605211	0.109892	0.176371	0.109892	0.135413	0.109892	0.0933603	0.0823791	0.135413	0.0749632	0.135413	0.0698989	0.135413
Coronary Aneurysm	DOID:3362	0.0411723	0.09999	0.115648	NA	0.0411723	0.351665	0.0476199	NA	0.0571439	0.0965077	0.173473	0.115648	0.0714299	0.138778	NA	0.115648	0.138778	0.115648	0.115648	0.0571439	0.0367619	0.138778	0.0476199	0.138778	0.138778	0.0933603	0.184015	0.0767921	0.0571439	0.138778	0.10155	0.0714299	0.10022	0.09999	0.351665	0.0933603	0.173473	0.12825	0.173473	0.0933603	0.173473	0.0571439	0.212832	0.226732	0.09999	0.226732	0.089279	0.0933603
Duodenal Ulcer	DOID:1724	0.0545214	0.132409	0.148977	NA	0.0545214	0.148977	0.0613433	NA	0.0714299	0.12373	0.386968	0.148977	0.0865818	0.173473	NA	0.148977	0.173473	0.148977	0.148977	0.0714299	0.049858	0.173473	0.0613433	0.173473	0.173473	0.109892	0.132409	0.107888	0.0714299	0.173473	0.130357	0.0865818	0.12426	0.132409	0.148977	0.109892	0.21027	0.147106	0.21027	0.109892	0.21027	0.0714299	0.148977	0.266882	0.132409	0.266882	0.121084	0.109892
Keratoderma, Palmoplantar, Diffuse	DOID:0050428	0.0322586	0.0783424	0.0934083	NA	0.0322586	0.0934083	0.0384622	NA	0.0476199	0.0781974	0.148977	0.0934083	0.0613433	0.115648	NA	0.0934083	0.115648	0.0934083	0.0934083	0.0476199	0.0280133	0.115648	0.0384622	0.115648	0.115648	0.0823791	0.0783424	0.056008	0.0476199	0.115648	0.0822137	0.0613433	0.0839745	0.0783424	0.0934083	0.0823791	0.148977	0.115769	0.148977	0.0823791	0.45301	0.0476199	0.0934083	0.608356	0.0783424	0.200064	0.0680322	0.0823791
Anemia, Hemolytic, Congenital	DOID:589	0.0262177	0.0636715	0.0783424	NA	0.0262177	0.0783424	0.0322586	NA	0.0411723	0.065727	0.132409	0.0783424	0.0545214	0.09999	NA	0.0783424	0.09999	0.0783424	0.0783424	0.0411723	0.0220824	0.09999	0.0322586	0.09999	0.09999	0.0749632	0.0636715	0.0419131	0.0411723	0.09999	0.210009	0.0545214	0.0728749	0.0636715	0.0783424	0.0749632	0.132409	0.10736	0.132409	0.0749632	0.132409	0.0411723	0.0783424	0.182054	0.0636715	0.182054	0.0536287	0.0749632
Burkitt Lymphoma	DOID:8584	0.12745	0.0172584	0.0230621	NA	0.12745	0.0230621	0.17031	NA	0.0767921	0.0194108	0.0444246	0.0230621	0.0444246	0.0316203	NA	0.0230621	0.0316203	0.0230621	0.0230621	0.233511	0.23246	0.0316203	0.17031	0.0316203	0.0316203	0.0640035	0.0172584	0.0086452	0.0316203	0.0316203	0.0203788	0.0444246	0.0231734	0.0172584	0.0230621	0.0640035	0.0444246	0.094962	0.0444246	0.0640035	0.0444246	0.0316203	0.0230621	0.0640035	0.0172584	0.0640035	0.0132837	0.0640035
Polycystic Ovary Syndrome	DOID:11612	0.10736	0.10736	0.115769	NA	0.10736	0.115769	0.115769	NA	0.12825	0.0943727	0.147106	0.115769	0.147106	0.12825	NA	0.115769	0.12825	0.115769	0.115769	0.12825	0.101627	0.12825	0.115769	0.12825	0.12825	0.176371	0.10736	0.094962	0.12825	0.12825	0.0999124	0.147106	0.0889973	0.10736	0.115769	0.176371	0.147106	0.543379	0.147106	0.176371	0.147106	0.12825	0.115769	0.176371	0.10736	0.176371	0.101627	0.176371
Dandy-Walker Syndrome	DOID:2785	0.0322586	0.0783424	0.284037	NA	0.0322586	0.0934083	0.0384622	NA	0.0476199	0.143909	0.148977	0.171903	0.0613433	0.212832	NA	0.0934083	0.212832	0.44423	0.171903	0.0476199	0.0280133	0.115648	0.0384622	0.115648	0.115648	0.0823791	0.0783424	0.103074	0.0476199	0.115648	0.0822137	0.0613433	0.225108	0.144176	0.0934083	0.0823791	0.148977	0.115769	0.148977	0.0823791	0.148977	0.0476199	0.0934083	0.200064	0.144176	0.368184	0.323547	0.0823791
Pancreatitis	DOID:4989	0.0545214	0.132409	0.148977	NA	0.0545214	0.148977	0.0613433	NA	0.0714299	0.12373	0.21027	0.148977	0.0865818	0.173473	NA	0.148977	0.173473	0.148977	0.148977	0.0714299	0.049858	0.319248	0.0613433	0.173473	0.319248	0.109892	0.132409	0.107888	0.0714299	0.173473	0.130357	0.0865818	0.12426	0.132409	0.148977	0.109892	0.386968	0.147106	0.386968	0.109892	0.21027	0.0714299	0.148977	0.266882	0.132409	0.266882	0.121084	0.109892
Hyperandrogenism	DOID:11613	0.0411723	0.09999	0.115648	NA	0.0411723	0.115648	0.0476199	NA	0.0571439	0.0965077	0.173473	0.115648	0.0714299	0.138778	NA	0.115648	0.138778	0.115648	0.115648	0.0571439	0.0367619	0.255398	0.0476199	0.138778	0.659999	0.0933603	0.09999	0.0767921	0.0571439	0.138778	0.10155	0.0714299	0.10022	0.09999	0.115648	0.0933603	0.319248	0.12825	0.319248	0.0933603	0.173473	0.0571439	0.115648	0.226732	0.09999	0.226732	0.089279	0.0933603
Vaginal Diseases	DOID:121	0.0545214	0.132409	0.148977	NA	0.0545214	0.148977	0.0613433	NA	0.0714299	0.12373	0.21027	0.148977	0.0865818	0.173473	NA	0.148977	0.173473	0.148977	0.148977	0.0714299	0.049858	0.173473	0.0613433	0.173473	0.173473	0.109892	0.132409	0.107888	0.0714299	0.173473	0.130357	0.0865818	0.12426	0.132409	0.148977	0.109892	0.21027	0.147106	0.21027	0.109892	0.21027	0.0714299	0.148977	0.266882	0.132409	0.266882	0.121084	0.109892
Porphyria, Acute Intermittent	DOID:3890	0.0411723	0.0411723	0.0476199	NA	0.0411723	0.0476199	0.0476199	NA	0.0571439	0.0397384	0.0714299	0.0476199	0.0714299	0.0571439	NA	0.0476199	0.0571439	0.0476199	0.0476199	0.0571439	0.0367619	0.0571439	0.0476199	0.0571439	0.0571439	0.0933603	0.0411723	0.0316203	0.0571439	0.0571439	0.0418146	0.319248	0.0412673	0.0411723	0.0476199	0.0933603	0.0714299	0.12825	0.0714299	0.689451	0.0714299	0.0571439	0.0476199	0.0933603	0.0411723	0.0933603	0.0367619	0.417263
Hypopituitarism	DOID:9406	0.0545214	0.132409	0.148977	NA	0.0545214	0.148977	0.0613433	NA	0.0714299	0.12373	0.21027	0.148977	0.0865818	0.173473	NA	0.148977	0.173473	0.148977	0.148977	0.0714299	0.049858	0.319248	0.0613433	0.173473	0.319248	0.109892	0.132409	0.107888	0.0714299	0.173473	0.130357	0.0865818	0.12426	0.132409	0.148977	0.109892	0.386968	0.147106	0.386968	0.109892	0.21027	0.0714299	0.148977	0.266882	0.132409	0.266882	0.121084	0.109892
Speech Disorders	DOID:92	0.0411723	0.0411723	0.0476199	NA	0.0411723	0.0476199	0.0476199	NA	0.0571439	0.0397384	0.0714299	0.0476199	0.173473	0.0571439	NA	0.0476199	0.0571439	0.0476199	0.0476199	0.0571439	0.0367619	0.0571439	0.0476199	0.0571439	0.0571439	0.0933603	0.0411723	0.0316203	0.0571439	0.0571439	0.0418146	0.0714299	0.0412673	0.0411723	0.0476199	0.0933603	0.0714299	0.12825	0.0714299	0.0933603	0.0714299	0.0571439	0.0476199	0.0933603	0.0411723	0.0933603	0.0367619	0.0933603
Acquired Immunodeficiency Syndrome	DOID:635	0.0545214	0.0545214	0.0613433	NA	0.0545214	0.0613433	0.0613433	NA	0.0714299	0.0509475	0.0865818	0.0613433	0.0865818	0.0714299	NA	0.0613433	0.0714299	0.0613433	0.0613433	0.0714299	0.049858	0.0714299	0.0613433	0.0714299	0.0714299	0.109892	0.0545214	0.0444246	0.0714299	0.0714299	0.0536764	0.0865818	0.051166	0.0545214	0.0613433	0.491152	0.0865818	0.147106	0.0865818	0.109892	0.0865818	0.0714299	0.0613433	0.109892	0.0545214	0.109892	0.049858	0.109892
Glomerulonephritis, Membranoproliferative	DOID:2920	0.0322586	0.0783424	0.0934083	NA	0.0322586	0.0934083	0.0384622	NA	0.0476199	0.0781974	0.148977	0.0934083	0.0613433	0.115648	NA	0.0934083	0.115648	0.0934083	0.0934083	0.0476199	0.0280133	0.115648	0.0384622	0.115648	0.115648	0.0823791	0.0783424	0.056008	0.0476199	0.115648	0.0822137	0.0613433	0.0839745	0.0783424	0.0934083	0.0823791	0.148977	0.115769	0.148977	0.0823791	0.148977	0.0476199	0.0934083	0.200064	0.0783424	0.200064	0.0680322	0.0823791
Conjunctival Diseases	DOID:4251	0.0322586	0.0783424	0.171903	NA	0.0322586	0.0934083	0.0384622	NA	0.0476199	0.534733	0.148977	0.673076	0.0613433	0.212832	NA	0.0934083	0.212832	0.171903	0.673076	0.0476199	0.0280133	0.115648	0.0384622	0.115648	0.115648	0.0823791	0.0783424	0.40358	0.0476199	0.115648	0.0822137	0.0613433	0.154541	0.838709	0.0934083	0.0823791	0.148977	0.115769	0.148977	0.0823791	0.148977	0.0476199	0.0934083	0.200064	0.37258	0.368184	0.125202	0.0823791
Down Syndrome	DOID:14250	0.0749632	0.0749632	0.0823791	NA	0.0749632	0.0823791	0.0823791	NA	0.0933603	0.0679241	0.109892	0.0823791	0.109892	0.0933603	NA	0.0823791	0.0933603	0.0823791	0.0823791	0.0933603	0.0698989	0.0933603	0.0823791	0.0933603	0.0933603	0.328859	0.0749632	0.0640035	0.226732	0.0933603	0.0716984	0.109892	0.066053	0.0749632	0.0823791	0.135413	0.109892	0.176371	0.109892	0.135413	0.109892	0.226732	0.0823791	0.135413	0.0749632	0.135413	0.0698989	0.135413
Angina, Unstable	DOID:8805	0.0322586	0.0783424	0.0934083	NA	0.0322586	0.171903	0.0384622	NA	0.0476199	0.0781974	0.148977	0.0934083	0.0613433	0.115648	NA	0.0934083	0.115648	0.0934083	0.0934083	0.0476199	0.0280133	0.115648	0.0384622	0.115648	0.115648	0.0823791	0.564516	0.056008	0.0476199	0.115648	0.0822137	0.0613433	0.0839745	0.0783424	0.171903	0.0823791	0.148977	0.115769	0.148977	0.0823791	0.148977	0.0476199	0.284037	0.200064	0.0783424	0.200064	0.0680322	0.0823791
Esophageal Atresia	DOID:10485	0.0545214	0.132409	0.148977	NA	0.0545214	0.148977	0.0613433	NA	0.0714299	0.12373	0.386968	0.148977	0.0865818	0.173473	NA	0.148977	0.173473	0.148977	0.148977	0.0714299	0.049858	0.173473	0.0613433	0.173473	0.173473	0.109892	0.132409	0.107888	0.0714299	0.173473	0.130357	0.0865818	0.12426	0.132409	0.148977	0.109892	0.21027	0.147106	0.21027	0.109892	0.21027	0.0714299	0.148977	0.266882	0.132409	0.266882	0.121084	0.109892
Spondylarthropathies	DOID:1123	0.0262177	0.681648	0.0783424	NA	0.0262177	0.0783424	0.0322586	NA	0.0411723	0.065727	0.132409	0.0783424	0.0545214	0.09999	NA	0.0783424	0.09999	0.0783424	0.0783424	0.0411723	0.0220824	0.09999	0.0322586	0.09999	0.09999	0.0749632	0.0636715	0.0419131	0.0411723	0.184015	0.0690634	0.0545214	0.0728749	0.0636715	0.0783424	0.0749632	0.132409	0.10736	0.132409	0.0749632	0.132409	0.0411723	0.0783424	0.182054	0.0636715	0.182054	0.0536287	0.0749632
von Hippel-Lindau Disease	DOID:14175	0.0783424	0.0322586	0.0384622	NA	0.0783424	0.0384622	0.0934083	NA	0.212832	0.0321989	0.0613433	0.0384622	0.0613433	0.0476199	NA	0.0384622	0.0476199	0.0384622	0.0384622	0.115648	0.0680322	0.0476199	0.0934083	0.0476199	0.0476199	0.0823791	0.0322586	0.0230621	0.0476199	0.0476199	0.0338527	0.0613433	0.0345777	0.0322586	0.0384622	0.0823791	0.0613433	0.115769	0.0613433	0.0823791	0.0613433	0.0476199	0.0384622	0.0823791	0.0322586	0.0823791	0.0280133	0.0823791
Psoriasis	DOID:4398	0.0411723	0.09999	0.115648	NA	0.0411723	0.115648	0.0476199	NA	0.0571439	0.0965077	0.173473	0.115648	0.0714299	0.138778	NA	0.115648	0.138778	0.115648	0.115648	0.0571439	0.0367619	0.138778	0.0476199	0.138778	0.138778	0.0933603	0.09999	0.0767921	0.0571439	0.138778	0.10155	0.0714299	0.10022	0.09999	0.115648	0.0933603	0.173473	0.12825	0.173473	0.0933603	0.825	0.0571439	0.115648	0.689451	0.09999	0.226732	0.089279	0.0933603
Hyperbilirubinemia	DOID:2741	0.0749632	0.0749632	0.0823791	NA	0.0749632	0.0823791	0.0823791	NA	0.0933603	0.0679241	0.109892	0.0823791	0.109892	0.0933603	NA	0.0823791	0.0933603	0.0823791	0.0823791	0.0933603	0.0698989	0.0933603	0.0823791	0.0933603	0.0933603	0.135413	0.0749632	0.0640035	0.0933603	0.0933603	0.0716984	0.491152	0.066053	0.0749632	0.0823791	0.135413	0.109892	0.176371	0.109892	0.605211	0.109892	0.0933603	0.0823791	0.135413	0.0749632	0.135413	0.0698989	0.605211
Optic Atrophy, Hereditary, Leber	DOID:705	0.0322586	0.0783424	0.171903	NA	0.0322586	0.0934083	0.0384622	NA	0.0476199	0.143909	0.148977	0.171903	0.0613433	0.351665	NA	0.0934083	0.549999	0.171903	0.171903	0.0476199	0.0280133	0.115648	0.0384622	0.115648	0.115648	0.0823791	0.0783424	0.103074	0.0476199	0.115648	0.0822137	0.0613433	0.255351	0.144176	0.0934083	0.0823791	0.148977	0.115769	0.148977	0.0823791	0.148977	0.0476199	0.0934083	0.200064	0.144176	0.368184	0.125202	0.0823791
Hyperthyroidism	DOID:7998	0.0545214	0.132409	0.148977	NA	0.0545214	0.148977	0.0613433	NA	0.0714299	0.12373	0.21027	0.148977	0.0865818	0.173473	NA	0.148977	0.173473	0.148977	0.148977	0.0714299	0.049858	0.319248	0.0613433	0.173473	0.319248	0.109892	0.132409	0.107888	0.0714299	0.173473	0.130357	0.0865818	0.12426	0.132409	0.148977	0.109892	0.386968	0.147106	0.386968	0.109892	0.21027	0.0714299	0.148977	0.266882	0.132409	0.266882	0.121084	0.109892
Ductus Arteriosus, Patent	DOID:13832	0.0411723	0.09999	0.115648	NA	0.0411723	0.351665	0.0476199	NA	0.0571439	0.0965077	0.173473	0.115648	0.0714299	0.138778	NA	0.115648	0.138778	0.115648	0.115648	0.0571439	0.0367619	0.138778	0.0476199	0.138778	0.138778	0.0933603	0.184015	0.0767921	0.0571439	0.138778	0.10155	0.0714299	0.10022	0.09999	0.351665	0.0933603	0.173473	0.12825	0.173473	0.0933603	0.173473	0.0571439	0.212832	0.226732	0.09999	0.226732	0.089279	0.0933603
Tyrosinemias	DOID:9275	0.0545214	0.0545214	0.0613433	NA	0.0545214	0.0613433	0.0613433	NA	0.0714299	0.0509475	0.0865818	0.0613433	0.0865818	0.0714299	NA	0.0613433	0.0714299	0.0613433	0.0613433	0.0714299	0.049858	0.0714299	0.0613433	0.0714299	0.0714299	0.109892	0.0545214	0.0444246	0.0714299	0.0714299	0.0536764	0.386968	0.051166	0.0545214	0.0613433	0.109892	0.0865818	0.147106	0.0865818	0.491152	0.0865818	0.0714299	0.0613433	0.109892	0.0545214	0.109892	0.049858	0.491152
Carcinoma	DOID:305<	NA	NA	NA	NA	NA	NA	NA	NA	NA	NA	NA	NA	NA	NA	NA	NA	NA	NA	NA	NA	NA	NA	NA	NA	NA	NA	NA	NA	NA	NA	NA	NA	NA	NA	NA	NA	NA	NA	NA	NA	NA	NA	NA	NA	NA	NA	NA	NA
Antisocial Personality Disorder	DOID:10939	0.0749632	0.0749632	0.0823791	NA	0.0749632	0.0823791	0.0823791	NA	0.0933603	0.0679241	0.109892	0.0823791	0.266882	0.0933603	NA	0.0823791	0.0933603	0.0823791	0.0823791	0.0933603	0.0698989	0.0933603	0.0823791	0.0933603	0.0933603	0.135413	0.0749632	0.0640035	0.0933603	0.0933603	0.0716984	0.109892	0.066053	0.0749632	0.0823791	0.135413	0.109892	0.176371	0.109892	0.135413	0.109892	0.0933603	0.0823791	0.135413	0.0749632	0.135413	0.0698989	0.135413
Acro-Osteolysis	DOID:2736	0.0411723	0.0411723	0.0476199	NA	0.0411723	0.0476199	0.0476199	NA	0.0571439	0.0397384	0.0714299	0.0476199	0.0714299	0.0571439	NA	0.0476199	0.0571439	0.0476199	0.0476199	0.0571439	0.0367619	0.0571439	0.0476199	0.0571439	0.0571439	0.417263	0.0411723	0.0316203	0.659999	0.0571439	0.0418146	0.0714299	0.0412673	0.0411723	0.0476199	0.0933603	0.0714299	0.12825	0.0714299	0.0933603	0.0714299	0.421999	0.0476199	0.0933603	0.0411723	0.0933603	0.0367619	0.0933603
Hemolytic-Uremic Syndrome	DOID:12554	0.0262177	0.0636715	0.0783424	NA	0.0262177	0.0783424	0.0322586	NA	0.0411723	0.065727	0.132409	0.0783424	0.0545214	0.09999	NA	0.0783424	0.09999	0.0783424	0.0783424	0.0411723	0.0220824	0.09999	0.0322586	0.09999	0.09999	0.0749632	0.0636715	0.0419131	0.0411723	0.09999	0.210009	0.0545214	0.0728749	0.0636715	0.0783424	0.0749632	0.132409	0.10736	0.132409	0.0749632	0.132409	0.0411723	0.0783424	0.182054	0.0636715	0.182054	0.0536287	0.0749632
Papilloma	DOID:139	0.09999	0.0411723	0.0476199	NA	0.09999	0.0476199	0.115648	NA	0.255398	0.0397384	0.0714299	0.0476199	0.0714299	0.0571439	NA	0.0476199	0.0571439	0.0476199	0.0476199	0.138778	0.089279	0.0571439	0.115648	0.0571439	0.0571439	0.0933603	0.0411723	0.0316203	0.0571439	0.0571439	0.0418146	0.0714299	0.0412673	0.0411723	0.0476199	0.0933603	0.0714299	0.12825	0.0714299	0.0933603	0.0714299	0.0571439	0.0476199	0.0933603	0.0411723	0.0933603	0.0367619	0.0933603
Migraine without Aura	DOID:12783	0.0322586	0.0783424	0.284037	NA	0.0322586	0.0934083	0.0384622	NA	0.0476199	0.143909	0.148977	0.171903	0.0613433	0.212832	NA	0.0934083	0.212832	0.44423	0.171903	0.0476199	0.0280133	0.115648	0.0384622	0.115648	0.115648	0.0823791	0.0783424	0.103074	0.0476199	0.115648	0.0822137	0.0613433	0.225108	0.144176	0.0934083	0.0823791	0.148977	0.115769	0.148977	0.0823791	0.148977	0.0476199	0.0934083	0.200064	0.144176	0.368184	0.323547	0.0823791
Amyloidosis, Familial	DOID:0050638	0.0545214	0.0545214	0.0613433	NA	0.0545214	0.0613433	0.0613433	NA	0.0714299	0.0509475	0.0865818	0.0613433	0.0865818	0.0714299	NA	0.0613433	0.0714299	0.0613433	0.0613433	0.0714299	0.049858	0.0714299	0.0613433	0.0714299	0.0714299	0.109892	0.0545214	0.0444246	0.0714299	0.0714299	0.0536764	0.21027	0.051166	0.0545214	0.0613433	0.109892	0.0865818	0.147106	0.0865818	0.266882	0.0865818	0.0714299	0.0613433	0.109892	0.0545214	0.109892	0.049858	0.266882
Vitiligo	DOID:12306	0.0411723	0.09999	0.115648	NA	0.0411723	0.115648	0.0476199	NA	0.0571439	0.0965077	0.173473	0.115648	0.0714299	0.138778	NA	0.115648	0.138778	0.115648	0.115648	0.0571439	0.0367619	0.138778	0.0476199	0.138778	0.138778	0.0933603	0.09999	0.0767921	0.0571439	0.138778	0.186886	0.0714299	0.10022	0.09999	0.115648	0.0933603	0.173473	0.12825	0.173473	0.0933603	0.173473	0.0571439	0.115648	0.226732	0.09999	0.226732	0.089279	0.0933603
Epilepsy, Benign Neonatal	DOID:14264	0.0220824	0.0536287	0.206874	NA	0.0220824	0.0680322	0.0280133	NA	0.0367619	0.105197	0.121084	0.125202	0.049858	0.164303	NA	0.0680322	0.164303	0.323547	0.125202	0.0367619	0.0180216	0.089279	0.0280133	0.089279	0.089279	0.0698989	0.0536287	0.0593699	0.0367619	0.089279	0.0600399	0.049858	0.168627	0.0986948	0.0680322	0.0698989	0.121084	0.101627	0.121084	0.0698989	0.121084	0.0367619	0.0680322	0.169754	0.0986948	0.312405	0.468554	0.0698989
Nephritis, Interstitial	DOID:1063	0.0411723	0.09999	0.115648	NA	0.0411723	0.115648	0.0476199	NA	0.0571439	0.0965077	0.173473	0.115648	0.0714299	0.138778	NA	0.115648	0.138778	0.115648	0.115648	0.0571439	0.0367619	0.138778	0.0476199	0.138778	0.138778	0.0933603	0.09999	0.0767921	0.0571439	0.138778	0.10155	0.0714299	0.10022	0.09999	0.115648	0.0933603	0.173473	0.12825	0.173473	0.0933603	0.173473	0.0571439	0.115648	0.226732	0.09999	0.226732	0.089279	0.0933603
Myeloproliferative Disorders	DOID:4960	0.238225	0.0322586	0.0384622	NA	0.238225	0.0384622	0.284037	NA	0.115648	0.0321989	0.0613433	0.0384622	0.0613433	0.0476199	NA	0.0384622	0.0476199	0.0384622	0.0384622	0.351665	0.490223	0.0476199	0.284037	0.0476199	0.0476199	0.0823791	0.0322586	0.0230621	0.0476199	0.0476199	0.0338527	0.0613433	0.0345777	0.0322586	0.0384622	0.0823791	0.0613433	0.115769	0.0613433	0.0823791	0.0613433	0.0476199	0.0384622	0.0823791	0.0322586	0.0823791	0.0280133	0.0823791
Fructose Intolerance	DOID:9869	0.0545214	0.0545214	0.0613433	NA	0.0545214	0.0613433	0.0613433	NA	0.0714299	0.0509475	0.0865818	0.0613433	0.0865818	0.0714299	NA	0.0613433	0.0714299	0.0613433	0.0613433	0.0714299	0.049858	0.0714299	0.0613433	0.0714299	0.0714299	0.109892	0.0545214	0.0444246	0.0714299	0.0714299	0.0536764	0.386968	0.051166	0.0545214	0.0613433	0.109892	0.0865818	0.147106	0.0865818	0.491152	0.0865818	0.0714299	0.0613433	0.109892	0.0545214	0.109892	0.049858	0.491152
Osteonecrosis	DOID:10159	0.0322586	0.37258	0.0934083	NA	0.0322586	0.0934083	0.0384622	NA	0.0476199	0.0781974	0.148977	0.0934083	0.0613433	0.115648	NA	0.0934083	0.115648	0.0934083	0.0934083	0.0476199	0.0280133	0.115648	0.0384622	0.115648	0.115648	0.0823791	0.0783424	0.056008	0.0476199	0.212832	0.0822137	0.0613433	0.0839745	0.0783424	0.0934083	0.0823791	0.148977	0.115769	0.148977	0.0823791	0.148977	0.0476199	0.0934083	0.200064	0.0783424	0.200064	0.0680322	0.0823791
Pulmonary Alveolar Proteinosis	DOID:12120	0.0411723	0.09999	0.115648	NA	0.0411723	0.115648	0.0476199	NA	0.0571439	0.0965077	0.173473	0.115648	0.0714299	0.138778	NA	0.549999	0.138778	0.115648	0.115648	0.0571439	0.0367619	0.138778	0.0476199	0.659999	0.138778	0.0933603	0.09999	0.0767921	0.0571439	0.138778	0.10155	0.0714299	0.10022	0.09999	0.115648	0.0933603	0.173473	0.12825	0.173473	0.0933603	0.173473	0.0571439	0.115648	0.226732	0.09999	0.226732	0.089279	0.0933603
Muscular Dystrophies, Limb-Girdle	DOID:11724	0.0262177	0.117177	0.0783424	NA	0.0262177	0.0783424	0.0322586	NA	0.0411723	0.065727	0.132409	0.0783424	0.0545214	0.09999	NA	0.0783424	0.09999	0.0783424	0.0783424	0.0411723	0.0220824	0.09999	0.0322586	0.09999	0.09999	0.0749632	0.0636715	0.0419131	0.0411723	0.720502	0.0690634	0.0545214	0.0728749	0.0636715	0.0783424	0.0749632	0.132409	0.10736	0.132409	0.0749632	0.132409	0.0411723	0.0783424	0.182054	0.0636715	0.182054	0.0536287	0.0749632
Lymphoma	DOID:0060058	0.238225	0.0322586	0.0384622	NA	0.238225	0.0384622	0.284037	NA	0.115648	0.0321989	0.0613433	0.0384622	0.0613433	0.0476199	NA	0.0384622	0.0476199	0.0384622	0.0384622	0.351665	0.490223	0.0476199	0.284037	0.0476199	0.0476199	0.0823791	0.0322586	0.0230621	0.0476199	0.0476199	0.0338527	0.0613433	0.0345777	0.0322586	0.0384622	0.0823791	0.0613433	0.115769	0.0613433	0.0823791	0.0613433	0.0476199	0.0384622	0.0823791	0.0322586	0.0823791	0.0280133	0.0823791
Sea-Blue Histiocyte Syndrome	DOID:4423	0.0245669	0.0596625	0.0709085	NA	0.0245669	0.0709085	0.0291976	NA	0.0359795	0.061785	0.111773	0.0709085	0.046024	0.0873788	NA	0.0709085	0.0873788	0.0709085	0.0709085	0.0359795	0.0213808	0.0873788	0.0291976	0.0873788	0.0873788	0.0611509	0.0596625	0.0428574	0.0359795	0.0873788	0.11827	0.205699	0.0679999	0.0596625	0.0709085	0.0611509	0.111773	0.0845132	0.111773	0.273307	0.111773	0.0359795	0.0709085	0.148509	0.0596625	0.148509	0.0519248	0.273307
Raynaud Disease	DOID:10300	0.0411723	0.09999	0.115648	NA	0.0411723	0.212832	0.0476199	NA	0.0571439	0.0965077	0.173473	0.115648	0.0714299	0.138778	NA	0.115648	0.138778	0.115648	0.115648	0.0571439	0.0367619	0.138778	0.0476199	0.138778	0.138778	0.0933603	0.304051	0.0767921	0.0571439	0.138778	0.10155	0.0714299	0.10022	0.09999	0.212832	0.0933603	0.173473	0.12825	0.173473	0.0933603	0.173473	0.0571439	0.549999	0.226732	0.09999	0.226732	0.089279	0.0933603
Peritonitis	DOID:8283	0.0749632	0.182054	0.200064	NA	0.0749632	0.200064	0.0823791	NA	0.0933603	0.164959	0.491152	0.200064	0.109892	0.226732	NA	0.200064	0.226732	0.200064	0.200064	0.0933603	0.0698989	0.226732	0.0823791	0.226732	0.226732	0.135413	0.182054	0.155437	0.0933603	0.226732	0.174125	0.109892	0.160414	0.182054	0.200064	0.135413	0.266882	0.176371	0.266882	0.135413	0.266882	0.0933603	0.200064	0.328859	0.182054	0.328859	0.169754	0.135413
Cecal Neoplasms	DOID:1517	0.0783424	0.0322586	0.0384622	NA	0.0783424	0.0384622	0.0934083	NA	0.351665	0.0321989	0.0613433	0.0384622	0.0613433	0.0476199	NA	0.0384622	0.0476199	0.0384622	0.0384622	0.115648	0.0680322	0.0476199	0.0934083	0.0476199	0.0476199	0.0823791	0.0322586	0.0230621	0.0476199	0.0476199	0.0338527	0.0613433	0.0345777	0.0322586	0.0384622	0.0823791	0.0613433	0.115769	0.0613433	0.0823791	0.0613433	0.0476199	0.0384622	0.0823791	0.0322586	0.0823791	0.0280133	0.0823791
Heart Block	DOID:990	0.0411723	0.09999	0.115648	NA	0.0411723	0.212832	0.0476199	NA	0.0571439	0.0965077	0.173473	0.115648	0.0714299	0.138778	NA	0.115648	0.138778	0.115648	0.115648	0.0571439	0.0367619	0.138778	0.0476199	0.138778	0.138778	0.0933603	0.184015	0.0767921	0.0571439	0.138778	0.10155	0.0714299	0.10022	0.09999	0.212832	0.0933603	0.173473	0.12825	0.173473	0.0933603	0.173473	0.0571439	0.212832	0.226732	0.09999	0.226732	0.089279	0.0933603
Myopathies, Structural, Congenital	DOID:422	0.0322586	0.144176	0.0934083	NA	0.0322586	0.0934083	0.0384622	NA	0.0476199	0.0781974	0.148977	0.0934083	0.0613433	0.115648	NA	0.0934083	0.115648	0.0934083	0.0934083	0.0476199	0.0280133	0.115648	0.0384622	0.115648	0.115648	0.0823791	0.0783424	0.056008	0.0476199	0.833333	0.0822137	0.0613433	0.0839745	0.0783424	0.0934083	0.0823791	0.148977	0.115769	0.148977	0.0823791	0.148977	0.0476199	0.0934083	0.200064	0.0783424	0.200064	0.0680322	0.0823791
Mesothelioma	DOID:2645	0.132409	0.0545214	0.0613433	NA	0.132409	0.0613433	0.148977	NA	0.319248	0.0509475	0.0865818	0.0613433	0.0865818	0.0714299	NA	0.0613433	0.0714299	0.0613433	0.0613433	0.173473	0.121084	0.0714299	0.148977	0.0714299	0.0714299	0.109892	0.0545214	0.0444246	0.0714299	0.0714299	0.0536764	0.0865818	0.051166	0.0545214	0.0613433	0.109892	0.0865818	0.147106	0.0865818	0.109892	0.0865818	0.0714299	0.0613433	0.109892	0.0545214	0.109892	0.049858	0.109892
Heart Defects, Congenital	DOID:1682	0.0545214	0.132409	0.148977	NA	0.0545214	0.45301	0.0613433	NA	0.0714299	0.12373	0.21027	0.148977	0.0865818	0.173473	NA	0.148977	0.173473	0.148977	0.148977	0.0714299	0.049858	0.173473	0.0613433	0.173473	0.173473	0.109892	0.243677	0.107888	0.0714299	0.173473	0.130357	0.0865818	0.12426	0.132409	0.45301	0.109892	0.21027	0.147106	0.21027	0.109892	0.21027	0.0714299	0.274167	0.266882	0.132409	0.266882	0.121084	0.109892
Fibroma	DOID:0050871	0.132409	0.0545214	0.0613433	NA	0.132409	0.0613433	0.148977	NA	0.319248	0.0509475	0.0865818	0.0613433	0.0865818	0.0714299	NA	0.0613433	0.0714299	0.0613433	0.0613433	0.173473	0.121084	0.0714299	0.148977	0.0714299	0.0714299	0.109892	0.0545214	0.0444246	0.0714299	0.0714299	0.0536764	0.0865818	0.051166	0.0545214	0.0613433	0.109892	0.0865818	0.147106	0.0865818	0.109892	0.0865818	0.0714299	0.0613433	0.109892	0.0545214	0.109892	0.049858	0.109892
Dystonia	DOID:543	0.0322586	0.0783424	0.284037	NA	0.0322586	0.0934083	0.0384622	NA	0.0476199	0.143909	0.148977	0.171903	0.0613433	0.212832	NA	0.0934083	0.212832	0.44423	0.171903	0.0476199	0.0280133	0.115648	0.0384622	0.115648	0.115648	0.0823791	0.0783424	0.103074	0.0476199	0.115648	0.0822137	0.0613433	0.225108	0.144176	0.0934083	0.0823791	0.148977	0.115769	0.148977	0.0823791	0.148977	0.0476199	0.0934083	0.200064	0.144176	0.368184	0.323547	0.0823791
Retinoblastoma	DOID:768	0.142026	0.0192322	0.0250878	NA	0.142026	0.0250878	0.185269	NA	0.0819002	0.0211008	0.0466468	0.0250878	0.0466468	0.0337236	NA	0.0250878	0.0337236	0.0250878	0.0250878	0.249044	0.112415	0.0337236	0.185269	0.0337236	0.0337236	0.0664141	0.0192322	0.0105433	0.0337236	0.0337236	0.0221572	0.0466468	0.0246847	0.0192322	0.0250878	0.0664141	0.0466468	0.0976859	0.0466468	0.0664141	0.0466468	0.0337236	0.0250878	0.0664141	0.0192322	0.0664141	0.0152224	0.0664141
Lung Neoplasms	DOID:3683	0.09999	0.0411723	0.0476199	NA	0.09999	0.0476199	0.115648	NA	0.421999	0.0397384	0.0714299	0.0476199	0.0714299	0.0571439	NA	0.0476199	0.0571439	0.0476199	0.0476199	0.138778	0.089279	0.0571439	0.115648	0.0571439	0.0571439	0.0933603	0.0411723	0.0316203	0.0571439	0.0571439	0.0418146	0.0714299	0.0412673	0.0411723	0.0476199	0.0933603	0.0714299	0.12825	0.0714299	0.0933603	0.0714299	0.0571439	0.0476199	0.0933603	0.0411723	0.0933603	0.0367619	0.0933603
Hepatitis B	DOID:2043	0.0749632	0.0749632	0.0823791	NA	0.0749632	0.0823791	0.0823791	NA	0.0933603	0.0679241	0.109892	0.0823791	0.109892	0.0933603	NA	0.0823791	0.0933603	0.0823791	0.0823791	0.0933603	0.0698989	0.0933603	0.0823791	0.0933603	0.0933603	0.135413	0.0749632	0.0640035	0.0933603	0.0933603	0.0716984	0.109892	0.066053	0.0749632	0.0823791	0.605211	0.109892	0.176371	0.109892	0.135413	0.109892	0.0933603	0.0823791	0.135413	0.0749632	0.135413	0.0698989	0.135413
Kernicterus	DOID:2382	0.0411723	0.09999	0.351665	NA	0.0411723	0.115648	0.0476199	NA	0.0571439	0.177607	0.173473	0.212832	0.0714299	0.255398	NA	0.115648	0.255398	0.549999	0.212832	0.0571439	0.0367619	0.138778	0.0476199	0.138778	0.138778	0.0933603	0.09999	0.141323	0.0571439	0.138778	0.10155	0.0714299	0.274072	0.184015	0.115648	0.0933603	0.173473	0.12825	0.173473	0.0933603	0.173473	0.0571439	0.115648	0.226732	0.184015	0.417263	0.424592	0.0933603
Hepatitis C	DOID:1883	0.0749632	0.0749632	0.0823791	NA	0.0749632	0.0823791	0.0823791	NA	0.0933603	0.0679241	0.109892	0.0823791	0.109892	0.0933603	NA	0.0823791	0.0933603	0.0823791	0.0823791	0.0933603	0.0698989	0.0933603	0.0823791	0.0933603	0.0933603	0.135413	0.0749632	0.0640035	0.0933603	0.0933603	0.0716984	0.109892	0.066053	0.0749632	0.0823791	0.605211	0.109892	0.176371	0.109892	0.135413	0.109892	0.0933603	0.0823791	0.135413	0.0749632	0.135413	0.0698989	0.135413
Hair Diseases	DOID:421	0.0749632	0.182054	0.200064	NA	0.0749632	0.200064	0.0823791	NA	0.0933603	0.164959	0.266882	0.200064	0.109892	0.226732	NA	0.200064	0.226732	0.200064	0.200064	0.0933603	0.0698989	0.226732	0.0823791	0.226732	0.226732	0.135413	0.182054	0.155437	0.0933603	0.226732	0.174125	0.109892	0.160414	0.182054	0.200064	0.135413	0.266882	0.176371	0.266882	0.135413	0.491152	0.0933603	0.200064	0.605211	0.182054	0.328859	0.169754	0.135413
Purpura	DOID:3326	0.0322586	0.0783424	0.0934083	NA	0.0322586	0.0934083	0.0384622	NA	0.0476199	0.0781974	0.148977	0.0934083	0.0613433	0.115648	NA	0.0934083	0.115648	0.0934083	0.0934083	0.0476199	0.0280133	0.115648	0.0384622	0.115648	0.115648	0.0823791	0.0783424	0.056008	0.0476199	0.115648	0.249997	0.0613433	0.0839745	0.0783424	0.0934083	0.0823791	0.148977	0.115769	0.148977	0.0823791	0.148977	0.0476199	0.0934083	0.200064	0.0783424	0.200064	0.0680322	0.0823791
Metabolic Syndrome X	DOID:14221	0.0411723	0.0411723	0.0476199	NA	0.0411723	0.0476199	0.0476199	NA	0.0571439	0.0397384	0.0714299	0.0476199	0.0714299	0.0571439	NA	0.0476199	0.0571439	0.0476199	0.0476199	0.0571439	0.0367619	0.0571439	0.0476199	0.0571439	0.0571439	0.0933603	0.0411723	0.0316203	0.0571439	0.0571439	0.0418146	0.173473	0.0412673	0.0411723	0.0476199	0.0933603	0.0714299	0.12825	0.0714299	0.226732	0.0714299	0.0571439	0.0476199	0.0933603	0.0411723	0.0933603	0.0367619	0.226732
Oculocerebrorenal Syndrome	DOID:1056	0.0545214	0.0545214	0.0613433	NA	0.0545214	0.0613433	0.0613433	NA	0.0714299	0.0509475	0.0865818	0.0613433	0.0865818	0.0714299	NA	0.0613433	0.0714299	0.0613433	0.0613433	0.0714299	0.049858	0.0714299	0.0613433	0.0714299	0.0714299	0.491152	0.0545214	0.0444246	0.319248	0.0714299	0.0536764	0.0865818	0.051166	0.0545214	0.0613433	0.109892	0.0865818	0.147106	0.0865818	0.109892	0.0865818	0.319248	0.0613433	0.109892	0.0545214	0.109892	0.049858	0.109892
Urticaria	DOID:1555	0.0545214	0.132409	0.148977	NA	0.0545214	0.148977	0.0613433	NA	0.0714299	0.12373	0.21027	0.148977	0.0865818	0.173473	NA	0.148977	0.173473	0.148977	0.148977	0.0714299	0.049858	0.173473	0.0613433	0.173473	0.173473	0.109892	0.132409	0.107888	0.0714299	0.173473	0.130357	0.0865818	0.12426	0.132409	0.148977	0.109892	0.21027	0.147106	0.21027	0.109892	0.639393	0.0714299	0.148977	0.811538	0.132409	0.266882	0.121084	0.109892
Metal Metabolism, Inborn Errors	DOID:896	0.0749632	0.0749632	0.0823791	NA	0.0749632	0.0823791	0.0823791	NA	0.0933603	0.0679241	0.109892	0.0823791	0.109892	0.0933603	NA	0.0823791	0.0933603	0.0823791	0.0823791	0.0933603	0.0698989	0.0933603	0.0823791	0.0933603	0.0933603	0.135413	0.0749632	0.0640035	0.0933603	0.0933603	0.0716984	0.491152	0.066053	0.0749632	0.0823791	0.135413	0.109892	0.176371	0.109892	0.605211	0.109892	0.0933603	0.0823791	0.135413	0.0749632	0.135413	0.0698989	0.605211
Nystagmus, Congenital	DOID:9649	0.0262177	0.0636715	0.144176	NA	0.0262177	0.0783424	0.0322586	NA	0.0411723	0.12096	0.132409	0.144176	0.0545214	0.304051	NA	0.0783424	0.720502	0.144176	0.144176	0.0411723	0.0220824	0.09999	0.0322586	0.09999	0.09999	0.0749632	0.0636715	0.0771343	0.0411723	0.09999	0.0690634	0.0545214	0.221599	0.117177	0.0783424	0.0749632	0.132409	0.10736	0.132409	0.0749632	0.132409	0.0411723	0.0783424	0.182054	0.117177	0.33504	0.0986948	0.0749632
Anemia, Macrocytic	DOID:2361	0.0411723	0.09999	0.115648	NA	0.0411723	0.115648	0.0476199	NA	0.0571439	0.0965077	0.173473	0.115648	0.0714299	0.138778	NA	0.115648	0.138778	0.115648	0.115648	0.0571439	0.0367619	0.138778	0.0476199	0.138778	0.138778	0.0933603	0.09999	0.0767921	0.0571439	0.138778	0.308794	0.0714299	0.10022	0.09999	0.115648	0.0933603	0.173473	0.12825	0.173473	0.0933603	0.173473	0.0571439	0.115648	0.226732	0.09999	0.226732	0.089279	0.0933603
Pseudohypoparathyroidism	DOID:4184	0.0545214	0.0545214	0.0613433	NA	0.0545214	0.0613433	0.0613433	NA	0.0714299	0.0509475	0.0865818	0.0613433	0.0865818	0.0714299	NA	0.0613433	0.0714299	0.0613433	0.0613433	0.0714299	0.049858	0.0714299	0.0613433	0.0714299	0.0714299	0.109892	0.0545214	0.0444246	0.0714299	0.0714299	0.0536764	0.386968	0.051166	0.0545214	0.0613433	0.109892	0.0865818	0.147106	0.0865818	0.491152	0.0865818	0.0714299	0.0613433	0.109892	0.0545214	0.109892	0.049858	0.491152
Brain Ischemia	DOID:2316	0.0411723	0.09999	0.115648	NA	0.0411723	0.212832	0.0476199	NA	0.0571439	0.0965077	0.173473	0.115648	0.0714299	0.138778	NA	0.115648	0.138778	0.115648	0.115648	0.0571439	0.0367619	0.138778	0.0476199	0.138778	0.138778	0.0933603	0.304051	0.0767921	0.0571439	0.138778	0.10155	0.0714299	0.10022	0.09999	0.212832	0.0933603	0.173473	0.12825	0.173473	0.0933603	0.173473	0.0571439	0.351665	0.226732	0.09999	0.226732	0.089279	0.0933603
Testicular Diseases	DOID:2519	0.0545214	0.132409	0.148977	NA	0.0545214	0.148977	0.0613433	NA	0.0714299	0.12373	0.21027	0.148977	0.0865818	0.173473	NA	0.148977	0.173473	0.148977	0.148977	0.0714299	0.049858	0.173473	0.0613433	0.173473	0.173473	0.109892	0.132409	0.107888	0.0714299	0.173473	0.130357	0.0865818	0.12426	0.132409	0.148977	0.109892	0.21027	0.147106	0.21027	0.109892	0.21027	0.0714299	0.148977	0.266882	0.132409	0.266882	0.121084	0.109892
Cystic Fibrosis	DOID:1485	0.0411723	0.0411723	0.0476199	NA	0.0411723	0.0476199	0.0476199	NA	0.0571439	0.0397384	0.0714299	0.0476199	0.0714299	0.0571439	NA	0.0476199	0.0571439	0.0476199	0.0476199	0.0571439	0.0367619	0.0571439	0.0476199	0.0571439	0.0571439	0.417263	0.0411723	0.0316203	0.421999	0.0571439	0.0418146	0.0714299	0.0412673	0.0411723	0.0476199	0.0933603	0.0714299	0.12825	0.0714299	0.0933603	0.0714299	0.659999	0.0476199	0.0933603	0.0411723	0.0933603	0.0367619	0.0933603
Epilepsy	DOID:1826	0.0411723	0.09999	0.351665	NA	0.0411723	0.115648	0.0476199	NA	0.0571439	0.177607	0.173473	0.212832	0.0714299	0.255398	NA	0.115648	0.255398	0.549999	0.212832	0.0571439	0.0367619	0.138778	0.0476199	0.138778	0.138778	0.0933603	0.09999	0.141323	0.0571439	0.138778	0.10155	0.0714299	0.274072	0.184015	0.115648	0.0933603	0.173473	0.12825	0.173473	0.0933603	0.173473	0.0571439	0.115648	0.226732	0.184015	0.417263	0.643322	0.0933603
Zellweger Syndrome	DOID:905	0.0545214	0.0545214	0.0613433	NA	0.0545214	0.0613433	0.0613433	NA	0.0714299	0.0509475	0.0865818	0.0613433	0.0865818	0.0714299	NA	0.0613433	0.0714299	0.0613433	0.0613433	0.0714299	0.049858	0.0714299	0.0613433	0.0714299	0.0714299	0.109892	0.0545214	0.0444246	0.0714299	0.0714299	0.0536764	0.386968	0.051166	0.0545214	0.0613433	0.109892	0.0865818	0.147106	0.0865818	0.491152	0.0865818	0.0714299	0.0613433	0.109892	0.0545214	0.109892	0.049858	0.491152
Mucopolysaccharidosis VI	DOID:12800	0.0411723	0.0411723	0.0476199	NA	0.0411723	0.0476199	0.0476199	NA	0.0571439	0.0397384	0.0714299	0.0476199	0.0714299	0.0571439	NA	0.0476199	0.0571439	0.0476199	0.0476199	0.0571439	0.0367619	0.0571439	0.0476199	0.0571439	0.0571439	0.0933603	0.0411723	0.0316203	0.0571439	0.0571439	0.0418146	0.319248	0.0412673	0.0411723	0.0476199	0.0933603	0.0714299	0.12825	0.0714299	0.417263	0.0714299	0.0571439	0.0476199	0.0933603	0.0411723	0.0933603	0.0367619	0.417263
Achondroplasia	DOID:4480	0.0262177	0.302808	0.0783424	NA	0.0262177	0.0783424	0.0322586	NA	0.0411723	0.065727	0.132409	0.0783424	0.0545214	0.09999	NA	0.0783424	0.09999	0.0783424	0.0783424	0.0411723	0.0220824	0.09999	0.0322586	0.09999	0.09999	0.0749632	0.0636715	0.0419131	0.0411723	0.184015	0.0690634	0.0545214	0.0728749	0.0636715	0.0783424	0.0749632	0.132409	0.10736	0.132409	0.0749632	0.132409	0.0411723	0.0783424	0.182054	0.0636715	0.182054	0.0536287	0.0749632
Cerebral Infarction	DOID:3526	0.0262177	0.0636715	0.0783424	NA	0.0262177	0.144176	0.0322586	NA	0.0411723	0.065727	0.132409	0.0783424	0.0545214	0.09999	NA	0.0783424	0.09999	0.0783424	0.0783424	0.0411723	0.0220824	0.09999	0.0322586	0.09999	0.09999	0.0749632	0.302808	0.0419131	0.0411723	0.09999	0.0690634	0.0545214	0.0728749	0.0636715	0.144176	0.0749632	0.132409	0.10736	0.132409	0.0749632	0.132409	0.0411723	0.238225	0.182054	0.0636715	0.182054	0.0536287	0.0749632
Adrenal Gland Diseases	DOID:9553	0.0749632	0.182054	0.200064	NA	0.0749632	0.200064	0.0823791	NA	0.0933603	0.164959	0.266882	0.200064	0.109892	0.226732	NA	0.200064	0.226732	0.200064	0.200064	0.0933603	0.0698989	0.689451	0.0823791	0.226732	0.417263	0.135413	0.182054	0.155437	0.0933603	0.226732	0.174125	0.109892	0.160414	0.182054	0.200064	0.135413	0.491152	0.176371	0.811538	0.135413	0.266882	0.0933603	0.200064	0.328859	0.182054	0.328859	0.169754	0.135413
Basal Cell Nevus Syndrome	DOID:2512	0.0411723	0.0411723	0.0476199	NA	0.0411723	0.0476199	0.0476199	NA	0.0571439	0.0397384	0.0714299	0.0476199	0.0714299	0.0571439	NA	0.0476199	0.0571439	0.0476199	0.0476199	0.0571439	0.0367619	0.0571439	0.0476199	0.0571439	0.0571439	0.417263	0.0411723	0.0316203	0.659999	0.0571439	0.0418146	0.0714299	0.0412673	0.0411723	0.0476199	0.0933603	0.0714299	0.12825	0.0714299	0.0933603	0.0714299	0.421999	0.0476199	0.0933603	0.0411723	0.0933603	0.0367619	0.0933603
Liver Cirrhosis, Biliary	DOID:12236	0.0250848	0.0609202	0.0724188	NA	0.0250848	0.0724188	0.0298195	NA	0.0367575	0.0629286	0.210245	0.0724188	0.0470412	0.0892681	NA	0.0724188	0.0892681	0.0724188	0.0724188	0.0367575	0.0218283	0.0892681	0.0298195	0.0892681	0.0892681	0.0625464	0.0609202	0.0437468	0.0367575	0.0892681	0.120549	0.0470412	0.0691387	0.0609202	0.0724188	0.0625464	0.114243	0.086536	0.114243	0.0625464	0.114243	0.0367575	0.0724188	0.151898	0.0609202	0.151898	0.0530115	0.0625464
Urinary Bladder Neoplasms	DOID:11054	0.304051	0.0411723	0.0476199	NA	0.304051	0.0476199	0.351665	NA	0.138778	0.0397384	0.0714299	0.0476199	0.0714299	0.0571439	NA	0.0476199	0.0571439	0.0476199	0.0476199	0.421999	0.271481	0.0571439	0.351665	0.0571439	0.0571439	0.0933603	0.0411723	0.0316203	0.0571439	0.0571439	0.0418146	0.0714299	0.0412673	0.0411723	0.0476199	0.0933603	0.0714299	0.12825	0.0714299	0.0933603	0.0714299	0.0571439	0.0476199	0.0933603	0.0411723	0.0933603	0.0367619	0.0933603
Kyphosis	DOID:4667	NA	NA	NA	NA	NA	NA	NA	NA	NA	NA	NA	NA	NA	NA	NA	NA	NA	NA	NA	NA	NA	NA	NA	NA	NA	NA	NA	NA	NA	NA	NA	NA	NA	NA	NA	NA	NA	NA	NA	NA	NA	NA	NA	NA	NA	NA	NA	NA
CADASIL	DOID:13945	0.0262177	0.0636715	0.238225	NA	0.0262177	0.0783424	0.0322586	NA	0.0411723	0.12096	0.132409	0.144176	0.0545214	0.184015	NA	0.0783424	0.184015	0.37258	0.144176	0.0411723	0.0220824	0.09999	0.0322586	0.09999	0.09999	0.0749632	0.0636715	0.0771343	0.0411723	0.09999	0.0690634	0.0545214	0.191655	0.117177	0.0783424	0.0749632	0.132409	0.10736	0.132409	0.0749632	0.132409	0.0411723	0.0783424	0.182054	0.117177	0.33504	0.255047	0.0749632
Dystonic Disorders	DOID:0050835	0.0262177	0.0636715	0.238225	NA	0.0262177	0.0783424	0.0322586	NA	0.0411723	0.12096	0.132409	0.144176	0.0545214	0.184015	NA	0.0783424	0.184015	0.37258	0.144176	0.0411723	0.0220824	0.09999	0.0322586	0.09999	0.09999	0.0749632	0.0636715	0.0771343	0.0411723	0.09999	0.0690634	0.0545214	0.191655	0.117177	0.0783424	0.0749632	0.132409	0.10736	0.132409	0.0749632	0.132409	0.0411723	0.0783424	0.182054	0.117177	0.33504	0.255047	0.0749632
Food Hypersensitivity	DOID:3044	0.0411723	0.09999	0.115648	NA	0.0411723	0.115648	0.0476199	NA	0.0571439	0.0965077	0.173473	0.115648	0.0714299	0.138778	NA	0.115648	0.138778	0.115648	0.115648	0.0571439	0.0367619	0.138778	0.0476199	0.138778	0.138778	0.0933603	0.09999	0.0767921	0.0571439	0.138778	0.186886	0.0714299	0.10022	0.09999	0.115648	0.0933603	0.173473	0.12825	0.173473	0.0933603	0.173473	0.0571439	0.115648	0.226732	0.09999	0.226732	0.089279	0.0933603
Pregnancy Complications	DOID:780	0.0411723	0.09999	0.115648	NA	0.0411723	0.115648	0.0476199	NA	0.0571439	0.0965077	0.173473	0.115648	0.0714299	0.138778	NA	0.115648	0.138778	0.115648	0.115648	0.0571439	0.0367619	0.138778	0.0476199	0.138778	0.138778	0.0933603	0.09999	0.0767921	0.0571439	0.138778	0.10155	0.0714299	0.10022	0.09999	0.115648	0.0933603	0.173473	0.12825	0.173473	0.0933603	0.173473	0.0571439	0.115648	0.226732	0.09999	0.226732	0.089279	0.0933603
Glycogen Storage Disease Type II	DOID:2752	0.0322586	0.0322586	0.0384622	NA	0.0322586	0.0384622	0.0384622	NA	0.0476199	0.0321989	0.0613433	0.0384622	0.0613433	0.0476199	NA	0.0384622	0.0476199	0.0384622	0.0384622	0.0476199	0.0280133	0.0476199	0.0384622	0.0476199	0.0476199	0.0823791	0.0322586	0.0230621	0.0476199	0.0476199	0.0338527	0.274167	0.0345777	0.0322586	0.0384622	0.0823791	0.0613433	0.115769	0.0613433	0.368184	0.0613433	0.0476199	0.0384622	0.0823791	0.0322586	0.0823791	0.0280133	0.368184
Epilepsy, Tonic-Clonic	DOID:7725	0.0220824	0.0536287	0.206874	NA	0.0220824	0.0680322	0.0280133	NA	0.0367619	0.105197	0.121084	0.125202	0.049858	0.164303	NA	0.0680322	0.164303	0.323547	0.125202	0.0367619	0.0180216	0.089279	0.0280133	0.089279	0.089279	0.0698989	0.0536287	0.0593699	0.0367619	0.089279	0.0600399	0.049858	0.168627	0.0986948	0.0680322	0.0698989	0.121084	0.101627	0.121084	0.0698989	0.121084	0.0367619	0.0680322	0.169754	0.0986948	0.312405	0.687385	0.0698989
Adenocarcinoma, Follicular	DOID:3962	0.193613	0.0262177	0.0322586	NA	0.193613	0.0322586	0.238225	NA	0.09999	0.0270641	0.0545214	0.0322586	0.0545214	0.0411723	NA	0.0322586	0.0411723	0.0322586	0.0322586	0.304051	0.163075	0.0411723	0.37258	0.0411723	0.0411723	0.0749632	0.0262177	0.0172584	0.0411723	0.0411723	0.0284379	0.0545214	0.0300073	0.0262177	0.0322586	0.0749632	0.0545214	0.10736	0.0545214	0.0749632	0.0545214	0.0411723	0.0322586	0.0749632	0.0262177	0.0749632	0.0220824	0.0749632
Dengue	DOID:12205	0.0749632	0.0749632	0.0823791	NA	0.0749632	0.0823791	0.0823791	NA	0.0933603	0.0679241	0.109892	0.0823791	0.109892	0.0933603	NA	0.0823791	0.0933603	0.0823791	0.0823791	0.0933603	0.0698989	0.0933603	0.0823791	0.0933603	0.0933603	0.135413	0.0749632	0.0640035	0.0933603	0.0933603	0.0716984	0.109892	0.066053	0.0749632	0.0823791	0.605211	0.109892	0.176371	0.109892	0.135413	0.109892	0.0933603	0.0823791	0.135413	0.0749632	0.135413	0.0698989	0.135413
Noonan Syndrome	DOID:3490	0.0411723	0.0411723	0.0476199	NA	0.0411723	0.0476199	0.0476199	NA	0.0571439	0.0397384	0.0714299	0.0476199	0.0714299	0.0571439	NA	0.0476199	0.0571439	0.0476199	0.0476199	0.0571439	0.0367619	0.0571439	0.0476199	0.0571439	0.0571439	0.417263	0.0411723	0.0316203	0.659999	0.0571439	0.0418146	0.0714299	0.0412673	0.0411723	0.0476199	0.0933603	0.0714299	0.12825	0.0714299	0.0933603	0.0714299	0.421999	0.0476199	0.0933603	0.0411723	0.0933603	0.0367619	0.0933603
Osteogenesis Imperfecta	DOID:12347	0.0262177	0.302808	0.0783424	NA	0.0262177	0.0783424	0.0322586	NA	0.0411723	0.065727	0.132409	0.0783424	0.0545214	0.09999	NA	0.0783424	0.09999	0.0783424	0.0783424	0.0411723	0.0220824	0.09999	0.0322586	0.09999	0.09999	0.0749632	0.0636715	0.0419131	0.0411723	0.184015	0.0690634	0.0545214	0.0728749	0.0636715	0.0783424	0.0749632	0.132409	0.10736	0.132409	0.0749632	0.132409	0.0411723	0.0783424	0.182054	0.0636715	0.182054	0.0536287	0.0749632
Cholecystitis	DOID:1949	0.041946	0.101869	0.114243	NA	0.041946	0.114243	0.0470412	NA	0.0545145	0.0987853	0.293225	0.114243	0.0656074	0.132392	NA	0.114243	0.132392	0.114243	0.114243	0.0545145	0.0384438	0.132392	0.0470412	0.132392	0.132392	0.0823681	0.101869	0.0834058	0.0545145	0.132392	0.102965	0.0656074	0.101664	0.101869	0.114243	0.0823681	0.159332	0.108385	0.159332	0.0823681	0.159332	0.0545145	0.114243	0.200037	0.101869	0.200037	0.0933635	0.0823681
Depressive Disorder	DOID:2848	0.0411723	0.0411723	0.0476199	NA	0.0411723	0.0476199	0.0476199	NA	0.0571439	0.0397384	0.0714299	0.0476199	0.527499	0.0571439	NA	0.0476199	0.0571439	0.0476199	0.0476199	0.0571439	0.0367619	0.0571439	0.0476199	0.0571439	0.0571439	0.0933603	0.0411723	0.0316203	0.0571439	0.0571439	0.0418146	0.0714299	0.0412673	0.0411723	0.0476199	0.0933603	0.0714299	0.12825	0.0714299	0.0933603	0.0714299	0.0571439	0.0476199	0.0933603	0.0411723	0.0933603	0.0367619	0.0933603
Supratentorial Neoplasms	DOID:1659	0.193613	0.0262177	0.0322586	NA	0.193613	0.0322586	0.238225	NA	0.09999	0.0270641	0.0545214	0.0322586	0.0545214	0.0411723	NA	0.0322586	0.0411723	0.0322586	0.0322586	0.304051	0.163075	0.0411723	0.238225	0.0411723	0.0411723	0.0749632	0.0262177	0.0172584	0.0411723	0.0411723	0.0284379	0.0545214	0.0300073	0.0262177	0.0322586	0.0749632	0.0545214	0.10736	0.0545214	0.0749632	0.0545214	0.0411723	0.0322586	0.0749632	0.0262177	0.0749632	0.0220824	0.0749632
Cerebellar Ataxia	DOID:0050753	0.0322586	0.0783424	0.284037	NA	0.0322586	0.0934083	0.0384622	NA	0.0476199	0.143909	0.148977	0.171903	0.0613433	0.212832	NA	0.0934083	0.212832	0.44423	0.171903	0.0476199	0.0280133	0.115648	0.0384622	0.115648	0.115648	0.0823791	0.0783424	0.103074	0.0476199	0.115648	0.0822137	0.0613433	0.225108	0.144176	0.0934083	0.0823791	0.148977	0.115769	0.148977	0.0823791	0.148977	0.0476199	0.0934083	0.200064	0.144176	0.368184	0.323547	0.0823791
Scoliosis	DOID:0060249	0.0322586	0.37258	0.0934083	NA	0.0322586	0.0934083	0.0384622	NA	0.0476199	0.0781974	0.148977	0.0934083	0.0613433	0.115648	NA	0.0934083	0.115648	0.0934083	0.0934083	0.0476199	0.0280133	0.115648	0.0384622	0.115648	0.115648	0.0823791	0.0783424	0.056008	0.0476199	0.212832	0.0822137	0.0613433	0.0839745	0.0783424	0.0934083	0.0823791	0.148977	0.115769	0.148977	0.0823791	0.148977	0.0476199	0.0934083	0.200064	0.0783424	0.200064	0.0680322	0.0823791
Deficiency Diseases	DOID:5113	0.0545214	0.0545214	0.0613433	NA	0.0545214	0.0613433	0.0613433	NA	0.0714299	0.0509475	0.0865818	0.0613433	0.0865818	0.0714299	NA	0.0613433	0.0714299	0.0613433	0.0613433	0.0714299	0.049858	0.0714299	0.0613433	0.0714299	0.0714299	0.109892	0.0545214	0.0444246	0.0714299	0.0714299	0.0536764	0.21027	0.051166	0.0545214	0.0613433	0.109892	0.0865818	0.147106	0.0865818	0.266882	0.0865818	0.0714299	0.0613433	0.109892	0.0545214	0.109892	0.049858	0.266882
Synostosis	DOID:11971	0.0262177	0.302808	0.0783424	NA	0.0262177	0.0783424	0.0322586	NA	0.0411723	0.065727	0.132409	0.0783424	0.0545214	0.09999	NA	0.0783424	0.09999	0.0783424	0.0783424	0.0411723	0.0220824	0.09999	0.0322586	0.09999	0.09999	0.0749632	0.0636715	0.0419131	0.0411723	0.184015	0.0690634	0.0545214	0.0728749	0.0636715	0.0783424	0.0749632	0.132409	0.10736	0.132409	0.0749632	0.132409	0.0411723	0.0783424	0.182054	0.0636715	0.182054	0.0536287	0.0749632
Endometrial Neoplasms	DOID:1380	0.193613	0.0262177	0.0322586	NA	0.193613	0.0322586	0.238225	NA	0.09999	0.0270641	0.0545214	0.0322586	0.0545214	0.0411723	NA	0.0322586	0.0411723	0.0322586	0.0322586	0.304051	0.163075	0.0411723	0.238225	0.0411723	0.0411723	0.0749632	0.0262177	0.0172584	0.0411723	0.0411723	0.0284379	0.0545214	0.0300073	0.0262177	0.0322586	0.0749632	0.0545214	0.10736	0.0545214	0.0749632	0.0545214	0.0411723	0.0322586	0.0749632	0.0262177	0.0749632	0.0220824	0.0749632
Job's Syndrome	DOID:3261	0.0322586	0.0783424	0.0934083	NA	0.0322586	0.0934083	0.0384622	NA	0.0476199	0.0781974	0.148977	0.0934083	0.0613433	0.115648	NA	0.0934083	0.115648	0.0934083	0.0934083	0.0476199	0.0280133	0.115648	0.0384622	0.115648	0.115648	0.0823791	0.0783424	0.056008	0.0476199	0.115648	0.390991	0.0613433	0.0839745	0.0783424	0.0934083	0.0823791	0.148977	0.115769	0.148977	0.0823791	0.148977	0.0476199	0.0934083	0.200064	0.0783424	0.200064	0.0680322	0.0823791
Histiocytoma	DOID:4231	0.838709	0.0322586	0.0384622	NA	0.564516	0.0384622	0.284037	NA	0.115648	0.0321989	0.0613433	0.0384622	0.0613433	0.0476199	NA	0.0384622	0.0476199	0.0384622	0.0384622	0.351665	0.206874	0.0476199	0.284037	0.0476199	0.0476199	0.0823791	0.0322586	0.0230621	0.0476199	0.0476199	0.0338527	0.0613433	0.0345777	0.0322586	0.0384622	0.0823791	0.0613433	0.115769	0.0613433	0.0823791	0.0613433	0.0476199	0.0384622	0.0823791	0.0322586	0.0823791	0.0280133	0.0823791
Shock, Septic	DOID:14115	0.0545214	0.0545214	0.0613433	NA	0.0545214	0.0613433	0.0613433	NA	0.0714299	0.0509475	0.0865818	0.0613433	0.0865818	0.0714299	NA	0.0613433	0.0714299	0.0613433	0.0613433	0.0714299	0.049858	0.0714299	0.0613433	0.0714299	0.0714299	0.109892	0.0545214	0.0444246	0.0714299	0.0714299	0.0536764	0.0865818	0.051166	0.0545214	0.0613433	0.266882	0.0865818	0.147106	0.0865818	0.109892	0.0865818	0.0714299	0.0613433	0.109892	0.0545214	0.109892	0.049858	0.109892
Sleep Disorders	DOID:535	0.10736	0.10736	0.115769	NA	0.10736	0.115769	0.115769	NA	0.12825	0.0943727	0.147106	0.115769	0.357257	0.12825	NA	0.115769	0.12825	0.115769	0.115769	0.12825	0.101627	0.12825	0.115769	0.12825	0.12825	0.176371	0.10736	0.094962	0.12825	0.12825	0.0999124	0.147106	0.0889973	0.10736	0.115769	0.176371	0.147106	0.223744	0.147106	0.176371	0.147106	0.12825	0.115769	0.176371	0.10736	0.176371	0.101627	0.176371
Endometriosis	DOID:289	0.0545214	0.132409	0.148977	NA	0.0545214	0.148977	0.0613433	NA	0.0714299	0.12373	0.21027	0.148977	0.0865818	0.173473	NA	0.148977	0.173473	0.148977	0.148977	0.0714299	0.049858	0.173473	0.0613433	0.173473	0.173473	0.109892	0.132409	0.107888	0.0714299	0.173473	0.130357	0.0865818	0.12426	0.132409	0.148977	0.109892	0.21027	0.147106	0.21027	0.109892	0.21027	0.0714299	0.148977	0.266882	0.132409	0.266882	0.121084	0.109892
Histiocytosis	DOID:3405	0.0545214	0.132409	0.148977	NA	0.0545214	0.148977	0.0613433	NA	0.0714299	0.12373	0.21027	0.148977	0.0865818	0.173473	NA	0.148977	0.173473	0.148977	0.148977	0.0714299	0.049858	0.173473	0.0613433	0.173473	0.173473	0.109892	0.132409	0.107888	0.0714299	0.173473	0.239901	0.0865818	0.12426	0.132409	0.148977	0.109892	0.21027	0.147106	0.21027	0.109892	0.21027	0.0714299	0.148977	0.266882	0.132409	0.266882	0.121084	0.109892
Carcinoma in Situ	DOID:8719	0.182054	0.0749632	0.0823791	NA	0.182054	0.0823791	0.200064	NA	0.226732	0.0679241	0.109892	0.0823791	0.109892	0.0933603	NA	0.0823791	0.0933603	0.0823791	0.0823791	0.226732	0.169754	0.0933603	0.200064	0.0933603	0.0933603	0.135413	0.0749632	0.0640035	0.0933603	0.0933603	0.0716984	0.109892	0.066053	0.0749632	0.0823791	0.135413	0.109892	0.176371	0.109892	0.135413	0.109892	0.0933603	0.0823791	0.135413	0.0749632	0.135413	0.0698989	0.135413
Spherocytosis, Hereditary	DOID:12971	0.0220824	0.0536287	0.0680322	NA	0.0220824	0.0680322	0.0280133	NA	0.0367619	0.0571619	0.121084	0.0680322	0.049858	0.089279	NA	0.0680322	0.089279	0.0680322	0.0680322	0.0367619	0.0180216	0.089279	0.0280133	0.089279	0.089279	0.0698989	0.0536287	0.0322604	0.0367619	0.089279	0.18257	0.049858	0.0652346	0.0536287	0.0680322	0.0698989	0.121084	0.101627	0.121084	0.0698989	0.121084	0.0367619	0.0680322	0.169754	0.0536287	0.169754	0.0437668	0.0698989
Diabetes Mellitus, Type 1	DOID:9744	0.0322586	0.0322586	0.0384622	NA	0.0322586	0.0384622	0.0384622	NA	0.0476199	0.0321989	0.0613433	0.0384622	0.0613433	0.0476199	NA	0.0384622	0.0476199	0.0384622	0.0384622	0.0476199	0.0280133	0.0476199	0.0384622	0.0476199	0.0476199	0.0823791	0.0322586	0.0230621	0.0476199	0.0476199	0.0338527	0.148977	0.0345777	0.0322586	0.0384622	0.0823791	0.0613433	0.115769	0.0613433	0.200064	0.0613433	0.0476199	0.0384622	0.0823791	0.0322586	0.0823791	0.0280133	0.200064
Diabetes Mellitus, Type 2	DOID:9352	0.0322586	0.0322586	0.0384622	NA	0.0322586	0.0384622	0.0384622	NA	0.0476199	0.0321989	0.0613433	0.0384622	0.0613433	0.0476199	NA	0.0384622	0.0476199	0.0384622	0.0384622	0.0476199	0.0280133	0.0476199	0.0384622	0.0476199	0.0476199	0.0823791	0.0322586	0.0230621	0.0476199	0.0476199	0.0338527	0.148977	0.0345777	0.0322586	0.0384622	0.0823791	0.0613433	0.115769	0.0613433	0.200064	0.0613433	0.0476199	0.0384622	0.0823791	0.0322586	0.0823791	0.0280133	0.200064
alpha-Thalassemia	DOID:1099	0.0322586	0.0322586	0.0384622	NA	0.0322586	0.0384622	0.0384622	NA	0.0476199	0.0321989	0.0613433	0.0384622	0.0613433	0.0476199	NA	0.0384622	0.0476199	0.0384622	0.0384622	0.0476199	0.0280133	0.0476199	0.0384622	0.0476199	0.0476199	0.368184	0.0322586	0.0230621	0.351665	0.0476199	0.0338527	0.0613433	0.0345777	0.0322586	0.0384622	0.0823791	0.0613433	0.115769	0.0613433	0.0823791	0.0613433	0.549999	0.0384622	0.0823791	0.0322586	0.0823791	0.0280133	0.0823791
Hyperostosis, Cortical, Congenital	DOID:4257	0.0322586	0.564516	0.0934083	NA	0.0322586	0.0934083	0.0384622	NA	0.0476199	0.0781974	0.148977	0.0934083	0.0613433	0.115648	NA	0.0934083	0.115648	0.0934083	0.0934083	0.0476199	0.0280133	0.115648	0.0384622	0.115648	0.115648	0.0823791	0.0783424	0.056008	0.0476199	0.212832	0.0822137	0.0613433	0.0839745	0.0783424	0.0934083	0.0823791	0.148977	0.115769	0.148977	0.0823791	0.148977	0.0476199	0.0934083	0.200064	0.0783424	0.200064	0.0680322	0.0823791
von Willebrand Diseases	DOID:12531	0.0322586	0.0783424	0.0934083	NA	0.0322586	0.0934083	0.0384622	NA	0.0476199	0.0781974	0.148977	0.0934083	0.0613433	0.115648	NA	0.0934083	0.115648	0.0934083	0.0934083	0.0476199	0.0280133	0.115648	0.0384622	0.115648	0.115648	0.0823791	0.0783424	0.056008	0.0476199	0.115648	0.249997	0.0613433	0.0839745	0.0783424	0.0934083	0.0823791	0.148977	0.115769	0.148977	0.0823791	0.148977	0.0476199	0.0934083	0.200064	0.0783424	0.200064	0.0680322	0.0823791
Genital Neoplasms, Female	DOID:120	0.304051	0.0411723	0.0476199	NA	0.304051	0.0476199	0.351665	NA	0.138778	0.0397384	0.0714299	0.0476199	0.0714299	0.0571439	NA	0.0476199	0.0571439	0.0476199	0.0476199	0.421999	0.271481	0.0571439	0.351665	0.0571439	0.0571439	0.0933603	0.0411723	0.0316203	0.0571439	0.0571439	0.0418146	0.0714299	0.0412673	0.0411723	0.0476199	0.0933603	0.0714299	0.12825	0.0714299	0.0933603	0.0714299	0.0571439	0.0476199	0.0933603	0.0411723	0.0933603	0.0367619	0.0933603
Asbestosis	DOID:10320	0.0262177	0.0636715	0.0783424	NA	0.0262177	0.0783424	0.0322586	NA	0.0411723	0.065727	0.132409	0.0783424	0.0545214	0.09999	NA	0.37258	0.09999	0.0783424	0.0783424	0.0411723	0.0220824	0.09999	0.0322586	0.475531	0.09999	0.0749632	0.0636715	0.0419131	0.0411723	0.09999	0.0690634	0.0545214	0.0728749	0.0636715	0.0783424	0.0749632	0.132409	0.10736	0.132409	0.0749632	0.132409	0.0411723	0.0783424	0.182054	0.0636715	0.182054	0.0536287	0.0749632
Peroxisomal Disorders	DOID:906	0.0749632	0.0749632	0.0823791	NA	0.0749632	0.0823791	0.0823791	NA	0.0933603	0.0679241	0.109892	0.0823791	0.109892	0.0933603	NA	0.0823791	0.0933603	0.0823791	0.0823791	0.0933603	0.0698989	0.0933603	0.0823791	0.0933603	0.0933603	0.135413	0.0749632	0.0640035	0.0933603	0.0933603	0.0716984	0.491152	0.066053	0.0749632	0.0823791	0.135413	0.109892	0.176371	0.109892	0.605211	0.109892	0.0933603	0.0823791	0.135413	0.0749632	0.135413	0.0698989	0.605211
Intracranial Aneurysm	DOID:10941	0.0220824	0.0536287	0.0680322	NA	0.0220824	0.125202	0.0280133	NA	0.0367619	0.0571619	0.121084	0.0680322	0.049858	0.089279	NA	0.0680322	0.089279	0.0680322	0.0680322	0.0367619	0.0180216	0.089279	0.0280133	0.089279	0.089279	0.0698989	0.255047	0.0322604	0.0367619	0.089279	0.0600399	0.049858	0.0652346	0.0536287	0.125202	0.0698989	0.121084	0.101627	0.121084	0.0698989	0.121084	0.0367619	0.206874	0.169754	0.0536287	0.169754	0.0437668	0.0698989
Adenocarcinoma	DOID:299	0.184015	0.0411723	0.0476199	NA	0.184015	0.0476199	0.212832	NA	0.138778	0.0397384	0.0714299	0.0476199	0.0714299	0.0571439	NA	0.0476199	0.0571439	0.0476199	0.0476199	0.255398	0.164303	0.0571439	0.212832	0.0571439	0.0571439	0.0933603	0.0411723	0.0316203	0.0571439	0.0571439	0.0418146	0.0714299	0.0412673	0.0411723	0.0476199	0.0933603	0.0714299	0.12825	0.0714299	0.0933603	0.0714299	0.0571439	0.0476199	0.0933603	0.0411723	0.0933603	0.0367619	0.0933603
Metabolism, Inborn Errors	DOID:655	0.10736	0.10736	0.115769	NA	0.10736	0.115769	0.115769	NA	0.12825	0.0943727	0.147106	0.115769	0.147106	0.12825	NA	0.115769	0.12825	0.115769	0.115769	0.12825	0.101627	0.12825	0.115769	0.12825	0.12825	0.176371	0.10736	0.094962	0.12825	0.12825	0.0999124	0.657472	0.0889973	0.10736	0.115769	0.176371	0.147106	0.223744	0.147106	0.78827	0.147106	0.12825	0.115769	0.176371	0.10736	0.176371	0.101627	0.78827
Hernia, Inguinal	DOID:0060320	0.0545214	0.132409	0.148977	NA	0.0545214	0.148977	0.0613433	NA	0.0714299	0.12373	0.639393	0.148977	0.0865818	0.173473	NA	0.148977	0.173473	0.148977	0.148977	0.0714299	0.049858	0.173473	0.0613433	0.173473	0.173473	0.109892	0.132409	0.107888	0.0714299	0.173473	0.130357	0.0865818	0.12426	0.132409	0.148977	0.109892	0.21027	0.147106	0.21027	0.109892	0.21027	0.0714299	0.148977	0.266882	0.132409	0.266882	0.121084	0.109892
Folliculitis	DOID:4409	0.0453888	0.11023	0.12373	NA	0.0453888	0.12373	0.0509475	NA	0.0591185	0.1058	0.173124	0.12373	0.0712865	0.143573	NA	0.12373	0.143573	0.12373	0.12373	0.0591185	0.0415738	0.143573	0.0509475	0.143573	0.143573	0.0897615	0.11023	0.090132	0.0591185	0.143573	0.110608	0.0712865	0.10813	0.11023	0.12373	0.0897615	0.173124	0.118656	0.173124	0.0897615	0.747632	0.0591185	0.12373	0.630548	0.11023	0.217992	0.100965	0.0897615
Obesity, Morbid	DOID:11981	0.0322586	0.0322586	0.0384622	NA	0.0322586	0.0384622	0.0384622	NA	0.0476199	0.0321989	0.0613433	0.0384622	0.0613433	0.0476199	NA	0.0384622	0.0476199	0.0384622	0.0384622	0.0476199	0.0280133	0.0476199	0.0384622	0.0476199	0.0476199	0.0823791	0.0322586	0.0230621	0.0476199	0.0476199	0.0338527	0.148977	0.0345777	0.0322586	0.0384622	0.0823791	0.0613433	0.115769	0.0613433	0.200064	0.0613433	0.0476199	0.0384622	0.0823791	0.0322586	0.0823791	0.0280133	0.200064
Opisthorchiasis	DOID:13768	0.0545214	0.0545214	0.0613433	NA	0.0545214	0.0613433	0.0613433	NA	0.0714299	0.0509475	0.0865818	0.0613433	0.0865818	0.0714299	NA	0.0613433	0.0714299	0.0613433	0.0613433	0.0714299	0.049858	0.0714299	0.0613433	0.0714299	0.0714299	0.109892	0.0545214	0.0444246	0.0714299	0.0714299	0.0536764	0.0865818	0.051166	0.0545214	0.0613433	0.266882	0.0865818	0.147106	0.0865818	0.109892	0.0865818	0.0714299	0.0613433	0.109892	0.0545214	0.109892	0.049858	0.109892
Nephrolithiasis	DOID:585	0.0545214	0.132409	0.148977	NA	0.0545214	0.148977	0.0613433	NA	0.0714299	0.12373	0.21027	0.148977	0.0865818	0.173473	NA	0.148977	0.173473	0.148977	0.148977	0.0714299	0.049858	0.173473	0.0613433	0.173473	0.173473	0.109892	0.132409	0.107888	0.0714299	0.173473	0.130357	0.0865818	0.12426	0.132409	0.148977	0.109892	0.21027	0.147106	0.21027	0.109892	0.21027	0.0714299	0.148977	0.266882	0.132409	0.266882	0.121084	0.109892
Mucopolysaccharidosis II	DOID:12799	0.0411723	0.0411723	0.0476199	NA	0.0411723	0.0476199	0.0476199	NA	0.0571439	0.0397384	0.0714299	0.0476199	0.0714299	0.0571439	NA	0.0476199	0.0571439	0.0476199	0.0476199	0.0571439	0.0367619	0.0571439	0.0476199	0.0571439	0.0571439	0.0933603	0.0411723	0.0316203	0.0571439	0.0571439	0.0418146	0.319248	0.0412673	0.0411723	0.0476199	0.0933603	0.0714299	0.12825	0.0714299	0.417263	0.0714299	0.0571439	0.0476199	0.0933603	0.0411723	0.0933603	0.0367619	0.417263
Avitaminosis	DOID:8450	NA	NA	NA	NA	NA	NA	NA	NA	NA	NA	NA	NA	NA	NA	NA	NA	NA	NA	NA	NA	NA	NA	NA	NA	NA	NA	NA	NA	NA	NA	NA	NA	NA	NA	NA	NA	NA	NA	NA	NA	NA	NA	NA	NA	NA	NA	NA	NA
Malaria	DOID:12365	0.0545214	0.0545214	0.0613433	NA	0.0545214	0.0613433	0.0613433	NA	0.0714299	0.0509475	0.0865818	0.0613433	0.0865818	0.0714299	NA	0.0613433	0.0714299	0.0613433	0.0613433	0.0714299	0.049858	0.0714299	0.0613433	0.0714299	0.0714299	0.109892	0.0545214	0.0444246	0.0714299	0.0714299	0.0536764	0.0865818	0.051166	0.0545214	0.0613433	0.266882	0.0865818	0.147106	0.0865818	0.109892	0.0865818	0.0714299	0.0613433	0.109892	0.0545214	0.109892	0.049858	0.109892
Congenital Disorders of Glycosylation	DOID:5212	0.0545214	0.0545214	0.0613433	NA	0.0545214	0.0613433	0.0613433	NA	0.0714299	0.0509475	0.0865818	0.0613433	0.0865818	0.0714299	NA	0.0613433	0.0714299	0.0613433	0.0613433	0.0714299	0.049858	0.0714299	0.0613433	0.0714299	0.0714299	0.109892	0.0545214	0.0444246	0.0714299	0.0714299	0.0536764	0.386968	0.051166	0.0545214	0.0613433	0.109892	0.0865818	0.147106	0.0865818	0.491152	0.0865818	0.0714299	0.0613433	0.109892	0.0545214	0.109892	0.049858	0.491152
Intestinal Perforation	DOID:2074	0.0545214	0.132409	0.148977	NA	0.0545214	0.148977	0.0613433	NA	0.0714299	0.12373	0.639393	0.148977	0.0865818	0.173473	NA	0.148977	0.173473	0.148977	0.148977	0.0714299	0.049858	0.173473	0.0613433	0.173473	0.173473	0.109892	0.132409	0.107888	0.0714299	0.173473	0.130357	0.0865818	0.12426	0.132409	0.148977	0.109892	0.21027	0.147106	0.21027	0.109892	0.21027	0.0714299	0.148977	0.266882	0.132409	0.266882	0.121084	0.109892
Stomach Diseases	DOID:76	0.0749632	0.182054	0.200064	NA	0.0749632	0.200064	0.0823791	NA	0.0933603	0.164959	0.491152	0.200064	0.109892	0.226732	NA	0.200064	0.226732	0.200064	0.200064	0.0933603	0.0698989	0.226732	0.0823791	0.226732	0.226732	0.135413	0.182054	0.155437	0.0933603	0.226732	0.174125	0.109892	0.160414	0.182054	0.200064	0.135413	0.266882	0.176371	0.266882	0.135413	0.266882	0.0933603	0.200064	0.328859	0.182054	0.328859	0.169754	0.135413
Mucopolysaccharidosis IV	DOID:12804	0.0411723	0.0411723	0.0476199	NA	0.0411723	0.0476199	0.0476199	NA	0.0571439	0.0397384	0.0714299	0.0476199	0.0714299	0.0571439	NA	0.0476199	0.0571439	0.0476199	0.0476199	0.0571439	0.0367619	0.0571439	0.0476199	0.0571439	0.0571439	0.0933603	0.0411723	0.0316203	0.0571439	0.0571439	0.0418146	0.319248	0.0412673	0.0411723	0.0476199	0.0933603	0.0714299	0.12825	0.0714299	0.417263	0.0714299	0.0571439	0.0476199	0.0933603	0.0411723	0.0933603	0.0367619	0.417263
Refsum Disease	DOID:10582	0.0545214	0.0545214	0.0613433	NA	0.0545214	0.0613433	0.0613433	NA	0.0714299	0.0509475	0.0865818	0.0613433	0.0865818	0.0714299	NA	0.0613433	0.0714299	0.0613433	0.0613433	0.0714299	0.049858	0.0714299	0.0613433	0.0714299	0.0714299	0.109892	0.0545214	0.0444246	0.0714299	0.0714299	0.0536764	0.639393	0.051166	0.0545214	0.0613433	0.109892	0.0865818	0.147106	0.0865818	0.491152	0.0865818	0.0714299	0.0613433	0.109892	0.0545214	0.109892	0.049858	0.491152
Ovarian Hyperstimulation Syndrome	DOID:5425	0.0411723	0.09999	0.115648	NA	0.0411723	0.115648	0.0476199	NA	0.0571439	0.0965077	0.173473	0.115648	0.0714299	0.138778	NA	0.115648	0.138778	0.115648	0.115648	0.0571439	0.0367619	0.138778	0.0476199	0.138778	0.138778	0.0933603	0.09999	0.0767921	0.0571439	0.138778	0.10155	0.0714299	0.10022	0.09999	0.115648	0.0933603	0.173473	0.12825	0.173473	0.0933603	0.173473	0.0571439	0.115648	0.226732	0.09999	0.226732	0.089279	0.0933603
Lactose Intolerance	DOID:10604	0.0545214	0.0545214	0.0613433	NA	0.0545214	0.0613433	0.0613433	NA	0.0714299	0.0509475	0.0865818	0.0613433	0.0865818	0.0714299	NA	0.0613433	0.0714299	0.0613433	0.0613433	0.0714299	0.049858	0.0714299	0.0613433	0.0714299	0.0714299	0.109892	0.0545214	0.0444246	0.0714299	0.0714299	0.0536764	0.386968	0.051166	0.0545214	0.0613433	0.109892	0.0865818	0.147106	0.0865818	0.491152	0.0865818	0.0714299	0.0613433	0.109892	0.0545214	0.109892	0.049858	0.491152
Ovarian Neoplasms	DOID:2394	0.238225	0.0322586	0.0384622	NA	0.238225	0.0384622	0.284037	NA	0.115648	0.0321989	0.0613433	0.0384622	0.0613433	0.0476199	NA	0.0384622	0.0476199	0.0384622	0.0384622	0.351665	0.206874	0.0476199	0.284037	0.0476199	0.0476199	0.0823791	0.0322586	0.0230621	0.0476199	0.0476199	0.0338527	0.0613433	0.0345777	0.0322586	0.0384622	0.0823791	0.0613433	0.115769	0.0613433	0.0823791	0.0613433	0.0476199	0.0384622	0.0823791	0.0322586	0.0823791	0.0280133	0.0823791
Fanconi Anemia	DOID:13636	0.0262177	0.0636715	0.0783424	NA	0.0262177	0.0783424	0.0322586	NA	0.0411723	0.065727	0.132409	0.0783424	0.0545214	0.09999	NA	0.0783424	0.09999	0.0783424	0.0783424	0.0411723	0.0220824	0.09999	0.0322586	0.09999	0.09999	0.0749632	0.0636715	0.0419131	0.0411723	0.09999	0.210009	0.0545214	0.0728749	0.0636715	0.0783424	0.0749632	0.132409	0.10736	0.132409	0.0749632	0.132409	0.0411723	0.0783424	0.182054	0.0636715	0.182054	0.0536287	0.0749632
Panic Disorder	DOID:594	0.0545214	0.0545214	0.0613433	NA	0.0545214	0.0613433	0.0613433	NA	0.0714299	0.0509475	0.0865818	0.0613433	0.386968	0.0714299	NA	0.0613433	0.0714299	0.0613433	0.0613433	0.0714299	0.049858	0.0714299	0.0613433	0.0714299	0.0714299	0.109892	0.0545214	0.0444246	0.0714299	0.0714299	0.0536764	0.0865818	0.051166	0.0545214	0.0613433	0.109892	0.0865818	0.147106	0.0865818	0.109892	0.0865818	0.0714299	0.0613433	0.109892	0.0545214	0.109892	0.049858	0.109892
Hypobetalipoproteinemias	DOID:1390	0.0411723	0.0411723	0.0476199	NA	0.0411723	0.0476199	0.0476199	NA	0.0571439	0.0397384	0.0714299	0.0476199	0.0714299	0.0571439	NA	0.0476199	0.0571439	0.0476199	0.0476199	0.0571439	0.0367619	0.0571439	0.0476199	0.0571439	0.0571439	0.0933603	0.0411723	0.0316203	0.0571439	0.0571439	0.0418146	0.527499	0.0412673	0.0411723	0.0476199	0.0933603	0.0714299	0.12825	0.0714299	0.417263	0.0714299	0.0571439	0.0476199	0.0933603	0.0411723	0.0933603	0.0367619	0.417263
Vaginal Neoplasms	DOID:119	0.238225	0.0322586	0.0384622	NA	0.238225	0.0384622	0.284037	NA	0.115648	0.0321989	0.0613433	0.0384622	0.0613433	0.0476199	NA	0.0384622	0.0476199	0.0384622	0.0384622	0.351665	0.206874	0.0476199	0.284037	0.0476199	0.0476199	0.0823791	0.0322586	0.0230621	0.0476199	0.0476199	0.0338527	0.0613433	0.0345777	0.0322586	0.0384622	0.0823791	0.0613433	0.115769	0.0613433	0.0823791	0.0613433	0.0476199	0.0384622	0.0823791	0.0322586	0.0823791	0.0280133	0.0823791
Severe Combined Immunodeficiency	DOID:5812	0.0322586	0.0783424	0.0934083	NA	0.0322586	0.0934083	0.0384622	NA	0.0476199	0.0781974	0.148977	0.0934083	0.0613433	0.115648	NA	0.0934083	0.115648	0.0934083	0.0934083	0.0476199	0.0280133	0.115648	0.0384622	0.115648	0.115648	0.0823791	0.0783424	0.056008	0.0476199	0.115648	0.249997	0.0613433	0.0839745	0.0783424	0.0934083	0.0823791	0.148977	0.115769	0.148977	0.0823791	0.148977	0.0476199	0.0934083	0.200064	0.0783424	0.200064	0.0680322	0.0823791
Anemia, Hemolytic	DOID:583	0.0322586	0.0783424	0.0934083	NA	0.0322586	0.0934083	0.0384622	NA	0.0476199	0.0781974	0.148977	0.0934083	0.0613433	0.115648	NA	0.0934083	0.115648	0.0934083	0.0934083	0.0476199	0.0280133	0.115648	0.0384622	0.115648	0.115648	0.0823791	0.0783424	0.056008	0.0476199	0.115648	0.249997	0.0613433	0.0839745	0.0783424	0.0934083	0.0823791	0.148977	0.115769	0.148977	0.0823791	0.148977	0.0476199	0.0934083	0.200064	0.0783424	0.200064	0.0680322	0.0823791
Calcinosis	DOID:182	0.0411723	0.0411723	0.0476199	NA	0.0411723	0.0476199	0.0476199	NA	0.0571439	0.0397384	0.0714299	0.0476199	0.0714299	0.0571439	NA	0.0476199	0.0571439	0.0476199	0.0476199	0.0571439	0.0367619	0.0571439	0.0476199	0.0571439	0.0571439	0.0933603	0.0411723	0.0316203	0.0571439	0.0571439	0.0418146	0.173473	0.0412673	0.0411723	0.0476199	0.0933603	0.0714299	0.12825	0.0714299	0.226732	0.0714299	0.0571439	0.0476199	0.0933603	0.0411723	0.0933603	0.0367619	0.226732
Hepatitis	DOID:12549	0.0749632	0.0749632	0.0823791	NA	0.0749632	0.0823791	0.0823791	NA	0.0933603	0.0679241	0.109892	0.0823791	0.109892	0.0933603	NA	0.0823791	0.0933603	0.0823791	0.0823791	0.0933603	0.0698989	0.0933603	0.0823791	0.0933603	0.0933603	0.135413	0.0749632	0.0640035	0.0933603	0.0933603	0.0716984	0.109892	0.066053	0.0749632	0.0823791	0.605211	0.109892	0.176371	0.109892	0.135413	0.109892	0.0933603	0.0823791	0.135413	0.0749632	0.135413	0.0698989	0.135413
Liddle Syndrome	DOID:0050477	0.0411723	0.09999	0.115648	NA	0.0411723	0.115648	0.0476199	NA	0.0571439	0.0965077	0.173473	0.115648	0.0714299	0.138778	NA	0.115648	0.138778	0.115648	0.115648	0.0571439	0.0367619	0.138778	0.0476199	0.138778	0.138778	0.0933603	0.09999	0.0767921	0.0571439	0.138778	0.10155	0.0714299	0.10022	0.09999	0.115648	0.0933603	0.173473	0.12825	0.173473	0.0933603	0.173473	0.0571439	0.115648	0.226732	0.09999	0.226732	0.089279	0.0933603
Erectile Dysfunction	DOID:1875	0.041946	0.0884832	0.100712	NA	0.041946	0.100712	0.0470412	NA	0.0545145	0.0870855	0.145273	0.100712	0.159332	0.118649	NA	0.100712	0.118649	0.100712	0.100712	0.0545145	0.0384438	0.118649	0.0470412	0.118649	0.118649	0.0823681	0.0884832	0.0702365	0.0545145	0.118649	0.09077	0.0656074	0.0911105	0.0884832	0.100712	0.0823681	0.145273	0.108385	0.145273	0.0823681	0.145273	0.0545145	0.100712	0.185501	0.0884832	0.185501	0.0800775	0.0823681
Protein S Deficiency	DOID:2451	0.0344352	0.0836282	0.0965077	NA	0.0344352	0.0965077	0.0397384	NA	0.0475288	0.0828031	0.143573	0.0965077	0.0591185	0.115427	NA	0.0965077	0.115427	0.0965077	0.0965077	0.0475288	0.0307938	0.115427	0.0397384	0.115427	0.115427	0.0766892	0.0836282	0.0644408	0.0475288	0.115427	0.411317	0.0591185	0.0874453	0.0836282	0.0965077	0.0766892	0.143573	0.104106	0.143573	0.0766892	0.143573	0.0475288	0.0965077	0.186245	0.0836282	0.186245	0.0747849	0.0766892
Thrombasthenia	DOID:2219	0.0270641	0.065727	0.0781974	NA	0.0270641	0.0781974	0.0321989	NA	0.0397384	0.0672467	0.12373	0.0781974	0.0509475	0.0965077	NA	0.0781974	0.0965077	0.0781974	0.0781974	0.0397384	0.0235373	0.0965077	0.0321989	0.0965077	0.0965077	0.0679241	0.065727	0.0471406	0.0397384	0.0965077	0.213452	0.0509475	0.0734034	0.065727	0.0781974	0.0679241	0.12373	0.0943727	0.12373	0.0679241	0.12373	0.0397384	0.0781974	0.164959	0.065727	0.164959	0.0571619	0.0679241
Uterine Neoplasms	DOID:363	0.238225	0.0322586	0.0384622	NA	0.238225	0.0384622	0.284037	NA	0.115648	0.0321989	0.0613433	0.0384622	0.0613433	0.0476199	NA	0.0384622	0.0476199	0.0384622	0.0384622	0.351665	0.206874	0.0476199	0.284037	0.0476199	0.0476199	0.0823791	0.0322586	0.0230621	0.0476199	0.0476199	0.0338527	0.0613433	0.0345777	0.0322586	0.0384622	0.0823791	0.0613433	0.115769	0.0613433	0.0823791	0.0613433	0.0476199	0.0384622	0.0823791	0.0322586	0.0823791	0.0280133	0.0823791
Syndactyly	DOID:11193	0.0220824	0.255047	0.0680322	NA	0.0220824	0.0680322	0.0280133	NA	0.0367619	0.0571619	0.121084	0.0680322	0.049858	0.089279	NA	0.0680322	0.089279	0.0680322	0.0680322	0.0367619	0.0180216	0.089279	0.0280133	0.089279	0.089279	0.0698989	0.0536287	0.0322604	0.0367619	0.164303	0.0600399	0.049858	0.0652346	0.0536287	0.0680322	0.0698989	0.121084	0.101627	0.121084	0.0698989	0.121084	0.0367619	0.0680322	0.169754	0.0536287	0.169754	0.0437668	0.0698989
Severe Acute Respiratory Syndrome	DOID:2945	0.0749632	0.0749632	0.0823791	NA	0.0749632	0.0823791	0.0823791	NA	0.0933603	0.0679241	0.109892	0.0823791	0.109892	0.0933603	NA	0.0823791	0.0933603	0.0823791	0.0823791	0.0933603	0.0698989	0.0933603	0.0823791	0.0933603	0.0933603	0.135413	0.0749632	0.0640035	0.0933603	0.0933603	0.0716984	0.109892	0.066053	0.0749632	0.0823791	0.605211	0.109892	0.176371	0.109892	0.135413	0.109892	0.0933603	0.0823791	0.135413	0.0749632	0.135413	0.0698989	0.135413
Hypophosphatasia	DOID:14213	0.0411723	0.0411723	0.0476199	NA	0.0411723	0.0476199	0.0476199	NA	0.0571439	0.0397384	0.0714299	0.0476199	0.0714299	0.0571439	NA	0.0476199	0.0571439	0.0476199	0.0476199	0.0571439	0.0367619	0.0571439	0.0476199	0.0571439	0.0571439	0.417263	0.0411723	0.0316203	0.659999	0.0571439	0.0418146	0.0714299	0.0412673	0.0411723	0.0476199	0.0933603	0.0714299	0.12825	0.0714299	0.0933603	0.0714299	0.421999	0.0476199	0.0933603	0.0411723	0.0933603	0.0367619	0.0933603
Hyperuricemia	DOID:1920	0.0749632	0.0749632	0.0823791	NA	0.0749632	0.0823791	0.0823791	NA	0.0933603	0.0679241	0.109892	0.0823791	0.109892	0.0933603	NA	0.0823791	0.0933603	0.0823791	0.0823791	0.0933603	0.0698989	0.0933603	0.0823791	0.0933603	0.0933603	0.135413	0.0749632	0.0640035	0.0933603	0.0933603	0.0716984	0.266882	0.066053	0.0749632	0.0823791	0.135413	0.109892	0.176371	0.109892	0.328859	0.109892	0.0933603	0.0823791	0.135413	0.0749632	0.135413	0.0698989	0.328859
Retinal Degeneration	DOID:8466	0.0262177	0.0636715	0.144176	NA	0.0262177	0.0783424	0.0322586	NA	0.0411723	0.634641	0.132409	0.564516	0.0545214	0.184015	NA	0.0783424	0.184015	0.144176	0.564516	0.0411723	0.0220824	0.09999	0.0322586	0.09999	0.09999	0.0749632	0.0636715	0.658271	0.0411723	0.09999	0.0690634	0.0545214	0.134114	0.458801	0.0783424	0.0749632	0.132409	0.10736	0.132409	0.0749632	0.132409	0.0411723	0.0783424	0.182054	0.302808	0.33504	0.0986948	0.0749632
Lymphedema	DOID:4977	0.0545214	0.132409	0.148977	NA	0.0545214	0.148977	0.0613433	NA	0.0714299	0.12373	0.21027	0.148977	0.0865818	0.173473	NA	0.148977	0.173473	0.148977	0.148977	0.0714299	0.049858	0.173473	0.0613433	0.173473	0.173473	0.109892	0.132409	0.107888	0.0714299	0.173473	0.239901	0.0865818	0.12426	0.132409	0.148977	0.109892	0.21027	0.147106	0.21027	0.109892	0.21027	0.0714299	0.148977	0.266882	0.132409	0.266882	0.121084	0.109892
Coronary Artery Disease	DOID:3393	0.0411723	0.09999	0.115648	NA	0.0411723	0.212832	0.0476199	NA	0.0571439	0.0965077	0.173473	0.115648	0.0714299	0.138778	NA	0.115648	0.138778	0.115648	0.115648	0.0571439	0.0367619	0.138778	0.0476199	0.138778	0.138778	0.0933603	0.720502	0.0767921	0.0571439	0.138778	0.10155	0.0714299	0.10022	0.09999	0.212832	0.0933603	0.173473	0.12825	0.173473	0.0933603	0.173473	0.0571439	0.351665	0.226732	0.09999	0.226732	0.089279	0.0933603
Pick Disease of the Brain	DOID:11870	0.0411723	0.09999	0.549999	NA	0.0411723	0.115648	0.0476199	NA	0.0571439	0.177607	0.173473	0.212832	0.0714299	0.255398	NA	0.115648	0.255398	0.351665	0.212832	0.0571439	0.0367619	0.138778	0.0476199	0.138778	0.138778	0.0933603	0.09999	0.141323	0.0571439	0.138778	0.10155	0.0714299	0.402119	0.184015	0.115648	0.0933603	0.173473	0.12825	0.173473	0.0933603	0.173473	0.0571439	0.115648	0.226732	0.184015	0.417263	0.271481	0.0933603
Oral Ulcer	DOID:9663	0.0411723	0.09999	0.115648	NA	0.0411723	0.115648	0.0476199	NA	0.0571439	0.0965077	0.319248	0.115648	0.0714299	0.138778	NA	0.115648	0.138778	0.115648	0.115648	0.0571439	0.0367619	0.138778	0.0476199	0.138778	0.138778	0.0933603	0.09999	0.0767921	0.0571439	0.138778	0.10155	0.0714299	0.10022	0.09999	0.115648	0.0933603	0.173473	0.12825	0.173473	0.0933603	0.173473	0.0571439	0.115648	0.226732	0.09999	0.226732	0.089279	0.0933603
Fatty Liver	DOID:9452	0.0411723	0.0411723	0.0476199	NA	0.0411723	0.0476199	0.0476199	NA	0.0571439	0.0397384	0.0714299	0.0476199	0.0714299	0.0571439	NA	0.0476199	0.0571439	0.0476199	0.0476199	0.0571439	0.0367619	0.0571439	0.0476199	0.0571439	0.0571439	0.0933603	0.0411723	0.0316203	0.0571439	0.0571439	0.0418146	0.319248	0.0412673	0.0411723	0.0476199	0.0933603	0.0714299	0.12825	0.0714299	0.417263	0.0714299	0.0571439	0.0476199	0.0933603	0.0411723	0.0933603	0.0367619	0.417263
Camurati-Engelmann Syndrome	DOID:4997	0.0262177	0.302808	0.0783424	NA	0.0262177	0.0783424	0.0322586	NA	0.0411723	0.065727	0.132409	0.0783424	0.0545214	0.09999	NA	0.0783424	0.09999	0.0783424	0.0783424	0.0411723	0.0220824	0.09999	0.0322586	0.09999	0.09999	0.0749632	0.0636715	0.0419131	0.0411723	0.184015	0.0690634	0.0545214	0.0728749	0.0636715	0.0783424	0.0749632	0.132409	0.10736	0.132409	0.0749632	0.132409	0.0411723	0.0783424	0.182054	0.0636715	0.182054	0.0536287	0.0749632
Barrett Esophagus	DOID:9206	0.0545214	0.132409	0.148977	NA	0.0545214	0.148977	0.0613433	NA	0.0714299	0.12373	0.386968	0.148977	0.0865818	0.173473	NA	0.148977	0.173473	0.148977	0.148977	0.0714299	0.049858	0.173473	0.0613433	0.173473	0.173473	0.109892	0.132409	0.107888	0.0714299	0.173473	0.130357	0.0865818	0.12426	0.132409	0.148977	0.109892	0.21027	0.147106	0.21027	0.109892	0.21027	0.0714299	0.148977	0.266882	0.132409	0.266882	0.121084	0.109892
Low Tension Glaucoma	DOID:13544	0.0172584	0.0419131	0.103074	NA	0.0172584	0.056008	0.0230621	NA	0.0316203	0.43682	0.107888	0.40358	0.0444246	0.141323	NA	0.056008	0.141323	0.103074	0.40358	0.0316203	0.0132837	0.0767921	0.0230621	0.0767921	0.0767921	0.0640035	0.0419131	0.329747	0.0316203	0.0767921	0.0494913	0.0444246	0.103571	0.302016	0.056008	0.0640035	0.107888	0.094962	0.107888	0.0640035	0.107888	0.0316203	0.056008	0.155437	0.19933	0.286057	0.0593699	0.0640035
Wolff-Parkinson-White Syndrome	DOID:384	0.0545214	0.132409	0.148977	NA	0.0545214	0.274167	0.0613433	NA	0.0714299	0.12373	0.21027	0.148977	0.0865818	0.173473	NA	0.148977	0.173473	0.148977	0.148977	0.0714299	0.049858	0.173473	0.0613433	0.173473	0.173473	0.109892	0.243677	0.107888	0.0714299	0.173473	0.130357	0.0865818	0.12426	0.132409	0.274167	0.109892	0.21027	0.147106	0.21027	0.109892	0.21027	0.0714299	0.274167	0.266882	0.132409	0.266882	0.121084	0.109892
Heart Diseases	DOID:114	0.0749632	0.182054	0.200064	NA	0.0749632	0.608356	0.0823791	NA	0.0933603	0.164959	0.266882	0.200064	0.109892	0.226732	NA	0.200064	0.226732	0.200064	0.200064	0.0933603	0.0698989	0.226732	0.0823791	0.226732	0.226732	0.135413	0.33504	0.155437	0.0933603	0.226732	0.174125	0.109892	0.160414	0.182054	0.608356	0.135413	0.266882	0.176371	0.266882	0.135413	0.266882	0.0933603	0.368184	0.328859	0.182054	0.328859	0.169754	0.135413
Proteus Syndrome	DOID:13482	0.10736	0.10736	0.115769	NA	0.10736	0.115769	0.115769	NA	0.12825	0.0943727	0.147106	0.115769	0.147106	0.12825	NA	0.115769	0.12825	0.115769	0.115769	0.12825	0.101627	0.12825	0.115769	0.12825	0.12825	0.176371	0.10736	0.094962	0.12825	0.12825	0.0999124	0.147106	0.0889973	0.10736	0.115769	0.176371	0.147106	0.223744	0.147106	0.176371	0.147106	0.12825	0.115769	0.176371	0.10736	0.176371	0.101627	0.176371
Entamoebiasis	DOID:9181	0.0545214	0.0545214	0.0613433	NA	0.0545214	0.0613433	0.0613433	NA	0.0714299	0.0509475	0.0865818	0.0613433	0.0865818	0.0714299	NA	0.0613433	0.0714299	0.0613433	0.0613433	0.0714299	0.049858	0.0714299	0.0613433	0.0714299	0.0714299	0.109892	0.0545214	0.0444246	0.0714299	0.0714299	0.0536764	0.0865818	0.051166	0.0545214	0.0613433	0.266882	0.0865818	0.147106	0.0865818	0.109892	0.0865818	0.0714299	0.0613433	0.109892	0.0545214	0.109892	0.049858	0.109892
Neutropenia	DOID:1227	0.0262177	0.0636715	0.0783424	NA	0.0262177	0.0783424	0.0322586	NA	0.0411723	0.065727	0.132409	0.0783424	0.0545214	0.09999	NA	0.0783424	0.09999	0.0783424	0.0783424	0.0411723	0.0220824	0.09999	0.0322586	0.09999	0.09999	0.0749632	0.0636715	0.0419131	0.0411723	0.09999	0.210009	0.0545214	0.0728749	0.0636715	0.0783424	0.0749632	0.132409	0.10736	0.132409	0.0749632	0.132409	0.0411723	0.0783424	0.182054	0.0636715	0.182054	0.0536287	0.0749632
Pulmonary Embolism	DOID:9477	0.0411723	0.09999	0.115648	NA	0.0411723	0.212832	0.0476199	NA	0.0571439	0.0965077	0.173473	0.115648	0.0714299	0.138778	NA	0.115648	0.138778	0.115648	0.115648	0.0571439	0.0367619	0.138778	0.0476199	0.138778	0.138778	0.0933603	0.475531	0.0767921	0.0571439	0.138778	0.10155	0.0714299	0.10022	0.09999	0.212832	0.0933603	0.173473	0.12825	0.173473	0.0933603	0.173473	0.0571439	0.351665	0.226732	0.09999	0.226732	0.089279	0.0933603
Myositis	DOID:633	0.0322586	0.144176	0.0934083	NA	0.0322586	0.0934083	0.0384622	NA	0.0476199	0.0781974	0.148977	0.0934083	0.0613433	0.115648	NA	0.0934083	0.115648	0.0934083	0.0934083	0.0476199	0.0280133	0.115648	0.0384622	0.115648	0.115648	0.0823791	0.0783424	0.056008	0.0476199	0.833333	0.0822137	0.0613433	0.0839745	0.0783424	0.0934083	0.0823791	0.148977	0.115769	0.148977	0.0823791	0.148977	0.0476199	0.0934083	0.200064	0.0783424	0.200064	0.0680322	0.0823791
Optic Neuritis	DOID:1210	0.0322586	0.0783424	0.171903	NA	0.0322586	0.0934083	0.0384622	NA	0.0476199	0.143909	0.148977	0.171903	0.0613433	0.351665	NA	0.0934083	0.549999	0.171903	0.171903	0.0476199	0.0280133	0.115648	0.0384622	0.115648	0.115648	0.0823791	0.0783424	0.103074	0.0476199	0.115648	0.0822137	0.0613433	0.255351	0.144176	0.0934083	0.0823791	0.148977	0.115769	0.148977	0.0823791	0.148977	0.0476199	0.0934083	0.200064	0.144176	0.368184	0.125202	0.0823791
Leukemia-Lymphoma, Adult T-Cell	DOID:5603	0.12745	0.0172584	0.0230621	NA	0.12745	0.0230621	0.17031	NA	0.0767921	0.0194108	0.0444246	0.0230621	0.0444246	0.0316203	NA	0.0230621	0.0316203	0.0230621	0.0230621	0.233511	0.34537	0.0316203	0.17031	0.0316203	0.0316203	0.0640035	0.0172584	0.0086452	0.0316203	0.0316203	0.0203788	0.0444246	0.0231734	0.0172584	0.0230621	0.0640035	0.0444246	0.094962	0.0444246	0.0640035	0.0444246	0.0316203	0.0230621	0.0640035	0.0172584	0.0640035	0.0132837	0.0640035
Uterine Diseases	DOID:345	0.0545214	0.132409	0.148977	NA	0.0545214	0.148977	0.0613433	NA	0.0714299	0.12373	0.21027	0.148977	0.0865818	0.173473	NA	0.148977	0.173473	0.148977	0.148977	0.0714299	0.049858	0.173473	0.0613433	0.173473	0.173473	0.109892	0.132409	0.107888	0.0714299	0.173473	0.130357	0.0865818	0.12426	0.132409	0.148977	0.109892	0.21027	0.147106	0.21027	0.109892	0.21027	0.0714299	0.148977	0.266882	0.132409	0.266882	0.121084	0.109892
Lymphatic Diseases	DOID:75	0.0749632	0.182054	0.200064	NA	0.0749632	0.200064	0.0823791	NA	0.0933603	0.164959	0.266882	0.200064	0.109892	0.226732	NA	0.200064	0.226732	0.200064	0.200064	0.0933603	0.0698989	0.226732	0.0823791	0.226732	0.226732	0.135413	0.182054	0.155437	0.0933603	0.226732	0.320448	0.109892	0.160414	0.182054	0.200064	0.135413	0.266882	0.176371	0.266882	0.135413	0.266882	0.0933603	0.200064	0.328859	0.182054	0.328859	0.169754	0.135413
Wegener Granulomatosis	DOID:12132	0.0328842	0.0798616	0.0921134	NA	0.0328842	0.16952	0.037929	NA	0.0453304	0.0795472	0.136778	0.0921134	0.0563205	0.110088	NA	0.0921134	0.110088	0.0921134	0.0921134	0.0453304	0.0294172	0.110088	0.037929	0.110088	0.110088	0.0729353	0.242844	0.0615857	0.0453304	0.110088	0.152641	0.0563205	0.0843462	0.0798616	0.16952	0.0729353	0.136778	0.0987475	0.136778	0.0729353	0.136778	0.0453304	0.2801	0.177129	0.0798616	0.177129	0.0714418	0.0729353
Tongue Neoplasms	DOID:8649	0.238225	0.0322586	0.0384622	NA	0.238225	0.0384622	0.44423	NA	0.115648	0.0321989	0.0613433	0.0384622	0.0613433	0.0476199	NA	0.0384622	0.0476199	0.0384622	0.0384622	0.549999	0.206874	0.0476199	0.284037	0.0476199	0.0476199	0.0823791	0.0322586	0.0230621	0.0476199	0.0476199	0.0338527	0.0613433	0.0345777	0.0322586	0.0384622	0.0823791	0.0613433	0.115769	0.0613433	0.0823791	0.0613433	0.0476199	0.0384622	0.0823791	0.0322586	0.0823791	0.0280133	0.0823791
Seminoma	DOID:4440	0.184015	0.0411723	0.0476199	NA	0.184015	0.0476199	0.212832	NA	0.138778	0.0397384	0.0714299	0.0476199	0.0714299	0.0571439	NA	0.0476199	0.0571439	0.0476199	0.0476199	0.255398	0.164303	0.0571439	0.212832	0.0571439	0.0571439	0.0933603	0.0411723	0.0316203	0.0571439	0.0571439	0.0418146	0.0714299	0.0412673	0.0411723	0.0476199	0.0933603	0.0714299	0.12825	0.0714299	0.0933603	0.0714299	0.0571439	0.0476199	0.0933603	0.0411723	0.0933603	0.0367619	0.0933603
Hypophosphatemic Rickets, X-Linked Dominant	DOID:0050445	0.0545214	0.0545214	0.0613433	NA	0.0545214	0.0613433	0.0613433	NA	0.0714299	0.0509475	0.0865818	0.0613433	0.0865818	0.0714299	NA	0.0613433	0.0714299	0.0613433	0.0613433	0.0714299	0.049858	0.0714299	0.0613433	0.0714299	0.0714299	0.109892	0.0545214	0.0444246	0.0714299	0.0714299	0.0536764	0.386968	0.051166	0.0545214	0.0613433	0.109892	0.0865818	0.147106	0.0865818	0.491152	0.0865818	0.0714299	0.0613433	0.109892	0.0545214	0.109892	0.049858	0.491152
Gonadal Dysgenesis	DOID:14447	0.0411723	0.09999	0.115648	NA	0.0411723	0.115648	0.0476199	NA	0.0571439	0.0965077	0.173473	0.115648	0.0714299	0.138778	NA	0.115648	0.138778	0.115648	0.115648	0.0571439	0.0367619	0.255398	0.0476199	0.138778	0.421999	0.0933603	0.09999	0.0767921	0.0571439	0.138778	0.10155	0.0714299	0.10022	0.09999	0.115648	0.0933603	0.319248	0.12825	0.319248	0.0933603	0.173473	0.0571439	0.115648	0.226732	0.09999	0.226732	0.089279	0.0933603
Nail Diseases	DOID:4123	0.0749632	0.182054	0.200064	NA	0.0749632	0.200064	0.0823791	NA	0.0933603	0.164959	0.266882	0.200064	0.109892	0.226732	NA	0.200064	0.226732	0.200064	0.200064	0.0933603	0.0698989	0.226732	0.0823791	0.226732	0.226732	0.135413	0.182054	0.155437	0.0933603	0.226732	0.174125	0.109892	0.160414	0.182054	0.200064	0.135413	0.266882	0.176371	0.266882	0.135413	0.491152	0.0933603	0.200064	0.605211	0.182054	0.328859	0.169754	0.135413
Varicose Veins	DOID:799	0.0411723	0.09999	0.115648	NA	0.0411723	0.212832	0.0476199	NA	0.0571439	0.0965077	0.173473	0.115648	0.0714299	0.138778	NA	0.115648	0.138778	0.115648	0.115648	0.0571439	0.0367619	0.138778	0.0476199	0.138778	0.138778	0.0933603	0.304051	0.0767921	0.0571439	0.138778	0.10155	0.0714299	0.10022	0.09999	0.212832	0.0933603	0.173473	0.12825	0.173473	0.0933603	0.173473	0.0571439	0.351665	0.226732	0.09999	0.226732	0.089279	0.0933603
Hemiplegia	DOID:10969	0.0545214	0.132409	0.45301	NA	0.0545214	0.148977	0.0613433	NA	0.0714299	0.227704	0.21027	0.274167	0.0865818	0.319248	NA	0.148977	0.319248	0.45301	0.274167	0.0714299	0.049858	0.173473	0.0613433	0.173473	0.173473	0.109892	0.132409	0.198551	0.0714299	0.173473	0.130357	0.0865818	0.346526	0.243677	0.148977	0.109892	0.21027	0.147106	0.21027	0.109892	0.21027	0.0714299	0.148977	0.266882	0.243677	0.491152	0.368193	0.109892
Acrocallosal Syndrome	DOID:9250	0.10736	0.10736	0.115769	NA	0.10736	0.115769	0.115769	NA	0.12825	0.0943727	0.147106	0.115769	0.147106	0.12825	NA	0.115769	0.12825	0.115769	0.115769	0.12825	0.101627	0.12825	0.115769	0.12825	0.12825	0.176371	0.10736	0.094962	0.12825	0.12825	0.0999124	0.147106	0.0889973	0.10736	0.115769	0.176371	0.147106	0.543379	0.147106	0.176371	0.147106	0.12825	0.115769	0.176371	0.10736	0.176371	0.101627	0.176371
Diabetes Mellitus	DOID:9351	0.0411723	0.0411723	0.0476199	NA	0.0411723	0.0476199	0.0476199	NA	0.0571439	0.0397384	0.0714299	0.0476199	0.0714299	0.0571439	NA	0.0476199	0.0571439	0.0476199	0.0476199	0.0571439	0.0367619	0.0571439	0.0476199	0.0571439	0.0571439	0.0933603	0.0411723	0.0316203	0.0571439	0.0571439	0.0418146	0.173473	0.0412673	0.0411723	0.0476199	0.0933603	0.0714299	0.12825	0.0714299	0.226732	0.0714299	0.0571439	0.0476199	0.0933603	0.0411723	0.0933603	0.0367619	0.226732
Heart Arrest	DOID:0060319	0.0411723	0.09999	0.115648	NA	0.0411723	0.351665	0.0476199	NA	0.0571439	0.0965077	0.173473	0.115648	0.0714299	0.138778	NA	0.115648	0.138778	0.115648	0.115648	0.0571439	0.0367619	0.138778	0.0476199	0.138778	0.138778	0.0933603	0.184015	0.0767921	0.0571439	0.138778	0.10155	0.0714299	0.10022	0.09999	0.351665	0.0933603	0.173473	0.12825	0.173473	0.0933603	0.173473	0.0571439	0.212832	0.226732	0.09999	0.226732	0.089279	0.0933603
Facial Nerve Diseases	DOID:14075	0.0322586	0.0783424	0.171903	NA	0.0322586	0.0934083	0.0384622	NA	0.0476199	0.143909	0.148977	0.171903	0.0613433	0.351665	NA	0.0934083	0.549999	0.171903	0.171903	0.0476199	0.0280133	0.115648	0.0384622	0.115648	0.115648	0.0823791	0.0783424	0.103074	0.0476199	0.115648	0.0822137	0.0613433	0.255351	0.144176	0.0934083	0.0823791	0.148977	0.115769	0.148977	0.0823791	0.148977	0.0476199	0.0934083	0.200064	0.144176	0.368184	0.125202	0.0823791
Leukemia, Myelogenous, Chronic, BCR-ABL Positive	DOID:8552	0.163075	0.0220824	0.0280133	NA	0.163075	0.0280133	0.206874	NA	0.089279	0.0235373	0.049858	0.0280133	0.049858	0.0367619	NA	0.0280133	0.0367619	0.0280133	0.0280133	0.271481	0.687385	0.0367619	0.206874	0.0367619	0.0367619	0.0698989	0.0220824	0.0132837	0.0367619	0.0367619	0.0247223	0.049858	0.0268613	0.0220824	0.0280133	0.0698989	0.049858	0.101627	0.049858	0.0698989	0.049858	0.0367619	0.0280133	0.0698989	0.0220824	0.0698989	0.0180216	0.0698989
Epilepsy, Temporal Lobe	DOID:3328	0.0262177	0.0636715	0.238225	NA	0.0262177	0.0783424	0.0322586	NA	0.0411723	0.12096	0.132409	0.144176	0.0545214	0.184015	NA	0.0783424	0.184015	0.37258	0.144176	0.0411723	0.0220824	0.09999	0.0322586	0.09999	0.09999	0.0749632	0.0636715	0.0771343	0.0411723	0.09999	0.0690634	0.0545214	0.191655	0.117177	0.0783424	0.0749632	0.132409	0.10736	0.132409	0.0749632	0.132409	0.0411723	0.0783424	0.182054	0.117177	0.33504	0.386435	0.0749632
Infertility, Male	DOID:12336	0.0545214	0.132409	0.148977	NA	0.0545214	0.148977	0.0613433	NA	0.0714299	0.12373	0.21027	0.148977	0.0865818	0.173473	NA	0.148977	0.173473	0.148977	0.148977	0.0714299	0.049858	0.173473	0.0613433	0.173473	0.173473	0.109892	0.132409	0.107888	0.0714299	0.173473	0.130357	0.0865818	0.12426	0.132409	0.148977	0.109892	0.21027	0.147106	0.21027	0.109892	0.21027	0.0714299	0.148977	0.266882	0.132409	0.266882	0.121084	0.109892
Hypertension, Renal	DOID:1073	0.0262177	0.0636715	0.0783424	NA	0.0262177	0.144176	0.0322586	NA	0.0411723	0.065727	0.132409	0.0783424	0.0545214	0.09999	NA	0.0783424	0.09999	0.0783424	0.0783424	0.0411723	0.0220824	0.09999	0.0322586	0.09999	0.09999	0.0749632	0.302808	0.0419131	0.0411723	0.09999	0.0690634	0.0545214	0.0728749	0.0636715	0.144176	0.0749632	0.132409	0.10736	0.132409	0.0749632	0.132409	0.0411723	0.238225	0.182054	0.0636715	0.182054	0.0536287	0.0749632
Craniosynostoses	DOID:2340	0.0220824	0.255047	0.0680322	NA	0.0220824	0.0680322	0.0280133	NA	0.0367619	0.0571619	0.121084	0.0680322	0.049858	0.089279	NA	0.0680322	0.089279	0.0680322	0.0680322	0.0367619	0.0180216	0.089279	0.0280133	0.089279	0.089279	0.0698989	0.0536287	0.0322604	0.0367619	0.164303	0.0600399	0.049858	0.0652346	0.0536287	0.0680322	0.0698989	0.121084	0.101627	0.121084	0.0698989	0.121084	0.0367619	0.0680322	0.169754	0.0536287	0.169754	0.0437668	0.0698989
MELAS Syndrome	DOID:3687	0.0220824	0.0986948	0.0680322	NA	0.0220824	0.0680322	0.0280133	NA	0.0367619	0.0571619	0.121084	0.0680322	0.049858	0.089279	NA	0.0680322	0.089279	0.0680322	0.0680322	0.0367619	0.0180216	0.089279	0.0280133	0.089279	0.089279	0.0698989	0.0536287	0.0322604	0.0367619	0.643322	0.0600399	0.049858	0.0652346	0.0536287	0.0680322	0.0698989	0.121084	0.101627	0.121084	0.0698989	0.121084	0.0367619	0.0680322	0.169754	0.0536287	0.169754	0.0437668	0.0698989
Machado-Joseph Disease	DOID:1440	0.0262177	0.0636715	0.37258	NA	0.0262177	0.0783424	0.0322586	NA	0.0411723	0.12096	0.132409	0.144176	0.0545214	0.184015	NA	0.0783424	0.184015	0.238225	0.144176	0.0411723	0.0220824	0.09999	0.0322586	0.09999	0.09999	0.0749632	0.0636715	0.0771343	0.0411723	0.09999	0.0690634	0.0545214	0.273855	0.117177	0.0783424	0.0749632	0.132409	0.10736	0.132409	0.0749632	0.132409	0.0411723	0.0783424	0.182054	0.117177	0.33504	0.163075	0.0749632
Cholelithiasis	DOID:10211	0.0545214	0.132409	0.148977	NA	0.0545214	0.148977	0.0613433	NA	0.0714299	0.12373	0.386968	0.148977	0.0865818	0.173473	NA	0.148977	0.173473	0.148977	0.148977	0.0714299	0.049858	0.173473	0.0613433	0.173473	0.173473	0.109892	0.132409	0.107888	0.0714299	0.173473	0.130357	0.0865818	0.12426	0.132409	0.148977	0.109892	0.21027	0.147106	0.21027	0.109892	0.21027	0.0714299	0.148977	0.266882	0.132409	0.266882	0.121084	0.109892
Periodontitis	DOID:824	0.0322586	0.0783424	0.0934083	NA	0.0322586	0.0934083	0.0384622	NA	0.0476199	0.0781974	0.274167	0.0934083	0.0613433	0.115648	NA	0.0934083	0.115648	0.0934083	0.0934083	0.0476199	0.0280133	0.115648	0.0384622	0.115648	0.115648	0.0823791	0.0783424	0.056008	0.0476199	0.115648	0.0822137	0.0613433	0.0839745	0.0783424	0.0934083	0.0823791	0.148977	0.115769	0.148977	0.0823791	0.148977	0.0476199	0.0934083	0.200064	0.0783424	0.200064	0.0680322	0.0823791
Ovarian Diseases	DOID:1100	0.0545214	0.132409	0.148977	NA	0.0545214	0.148977	0.0613433	NA	0.0714299	0.12373	0.21027	0.148977	0.0865818	0.173473	NA	0.148977	0.173473	0.148977	0.148977	0.0714299	0.049858	0.173473	0.0613433	0.173473	0.173473	0.109892	0.132409	0.107888	0.0714299	0.173473	0.130357	0.0865818	0.12426	0.132409	0.148977	0.109892	0.21027	0.147106	0.21027	0.109892	0.21027	0.0714299	0.148977	0.266882	0.132409	0.266882	0.121084	0.109892
Heart Septal Defects, Atrial	DOID:1882	0.0322586	0.0783424	0.0934083	NA	0.0322586	0.284037	0.0384622	NA	0.0476199	0.0781974	0.148977	0.0934083	0.0613433	0.115648	NA	0.0934083	0.115648	0.0934083	0.0934083	0.0476199	0.0280133	0.115648	0.0384622	0.115648	0.115648	0.0823791	0.144176	0.056008	0.0476199	0.115648	0.0822137	0.0613433	0.0839745	0.0783424	0.284037	0.0823791	0.148977	0.115769	0.148977	0.0823791	0.148977	0.0476199	0.171903	0.200064	0.0783424	0.200064	0.0680322	0.0823791
Hirschsprung Disease	DOID:10487	0.0322586	0.0783424	0.0934083	NA	0.0322586	0.0934083	0.0384622	NA	0.0476199	0.0781974	0.45301	0.0934083	0.0613433	0.115648	NA	0.0934083	0.115648	0.0934083	0.0934083	0.0476199	0.0280133	0.115648	0.0384622	0.115648	0.115648	0.0823791	0.0783424	0.056008	0.0476199	0.115648	0.0822137	0.0613433	0.0839745	0.0783424	0.0934083	0.0823791	0.148977	0.115769	0.148977	0.0823791	0.148977	0.0476199	0.0934083	0.200064	0.0783424	0.200064	0.0680322	0.0823791
Melanoma	DOID:1909	0.243677	0.0545214	0.0613433	NA	0.243677	0.0613433	0.274167	NA	0.173473	0.0509475	0.0865818	0.0613433	0.0865818	0.0714299	NA	0.0613433	0.0714299	0.0613433	0.0613433	0.319248	0.222835	0.0714299	0.274167	0.0714299	0.0714299	0.109892	0.0545214	0.0444246	0.0714299	0.0714299	0.0536764	0.0865818	0.051166	0.0545214	0.0613433	0.109892	0.0865818	0.147106	0.0865818	0.109892	0.0865818	0.0714299	0.0613433	0.109892	0.0545214	0.109892	0.049858	0.109892
Pulmonary Veno-Occlusive Disease	DOID:5453	0.0262177	0.0636715	0.0783424	NA	0.0262177	0.144176	0.0322586	NA	0.0411723	0.065727	0.132409	0.0783424	0.0545214	0.09999	NA	0.0783424	0.09999	0.0783424	0.0783424	0.0411723	0.0220824	0.09999	0.0322586	0.09999	0.09999	0.0749632	0.302808	0.0419131	0.0411723	0.09999	0.0690634	0.0545214	0.0728749	0.0636715	0.144176	0.0749632	0.132409	0.10736	0.132409	0.0749632	0.132409	0.0411723	0.238225	0.182054	0.0636715	0.182054	0.0536287	0.0749632
Kidney Neoplasms	DOID:263	0.304051	0.0411723	0.0476199	NA	0.304051	0.0476199	0.351665	NA	0.138778	0.0397384	0.0714299	0.0476199	0.0714299	0.0571439	NA	0.0476199	0.0571439	0.0476199	0.0476199	0.421999	0.271481	0.0571439	0.351665	0.0571439	0.0571439	0.0933603	0.0411723	0.0316203	0.0571439	0.0571439	0.0418146	0.0714299	0.0412673	0.0411723	0.0476199	0.0933603	0.0714299	0.12825	0.0714299	0.0933603	0.0714299	0.0571439	0.0476199	0.0933603	0.0411723	0.0933603	0.0367619	0.0933603
Telangiectasis	DOID:1272	0.0411723	0.09999	0.115648	NA	0.0411723	0.212832	0.0476199	NA	0.0571439	0.0965077	0.173473	0.115648	0.0714299	0.138778	NA	0.115648	0.138778	0.115648	0.115648	0.0571439	0.0367619	0.138778	0.0476199	0.138778	0.138778	0.0933603	0.304051	0.0767921	0.0571439	0.138778	0.10155	0.0714299	0.10022	0.09999	0.212832	0.0933603	0.173473	0.12825	0.173473	0.0933603	0.173473	0.0571439	0.549999	0.226732	0.09999	0.226732	0.089279	0.0933603
Neuronal Ceroid-Lipofuscinoses	DOID:14503	0.0411723	0.0411723	0.0476199	NA	0.0411723	0.0476199	0.0476199	NA	0.0571439	0.0397384	0.0714299	0.0476199	0.0714299	0.0571439	NA	0.0476199	0.0571439	0.0476199	0.0476199	0.0571439	0.0367619	0.0571439	0.0476199	0.0571439	0.0571439	0.0933603	0.0411723	0.0316203	0.0571439	0.0571439	0.0418146	0.319248	0.0412673	0.0411723	0.0476199	0.0933603	0.0714299	0.12825	0.0714299	0.417263	0.0714299	0.0571439	0.0476199	0.0933603	0.0411723	0.0933603	0.0367619	0.417263
Corneal Diseases	DOID:10124	0.0322586	0.0783424	0.171903	NA	0.0322586	0.0934083	0.0384622	NA	0.0476199	0.534733	0.148977	0.673076	0.0613433	0.212832	NA	0.0934083	0.212832	0.171903	0.673076	0.0476199	0.0280133	0.115648	0.0384622	0.115648	0.115648	0.0823791	0.0783424	0.40358	0.0476199	0.115648	0.0822137	0.0613433	0.154541	0.564516	0.0934083	0.0823791	0.148977	0.115769	0.148977	0.0823791	0.148977	0.0476199	0.0934083	0.200064	0.37258	0.368184	0.125202	0.0823791
Hypogonadism	DOID:1924	0.0545214	0.132409	0.148977	NA	0.0545214	0.148977	0.0613433	NA	0.0714299	0.12373	0.21027	0.148977	0.0865818	0.173473	NA	0.148977	0.173473	0.148977	0.148977	0.0714299	0.049858	0.319248	0.0613433	0.173473	0.527499	0.109892	0.132409	0.107888	0.0714299	0.173473	0.130357	0.0865818	0.12426	0.132409	0.148977	0.109892	0.386968	0.147106	0.386968	0.109892	0.21027	0.0714299	0.148977	0.266882	0.132409	0.266882	0.121084	0.109892
Carbohydrate Metabolism, Inborn Errors	DOID:2978	0.0749632	0.0749632	0.0823791	NA	0.0749632	0.0823791	0.0823791	NA	0.0933603	0.0679241	0.109892	0.0823791	0.109892	0.0933603	NA	0.0823791	0.0933603	0.0823791	0.0823791	0.0933603	0.0698989	0.0933603	0.0823791	0.0933603	0.0933603	0.135413	0.0749632	0.0640035	0.0933603	0.0933603	0.0716984	0.491152	0.066053	0.0749632	0.0823791	0.135413	0.109892	0.176371	0.109892	0.605211	0.109892	0.0933603	0.0823791	0.135413	0.0749632	0.135413	0.0698989	0.605211
Anus, Imperforate	DOID:10488	0.10736	0.10736	0.115769	NA	0.10736	0.115769	0.115769	NA	0.12825	0.0943727	0.147106	0.115769	0.147106	0.12825	NA	0.115769	0.12825	0.115769	0.115769	0.12825	0.101627	0.12825	0.115769	0.12825	0.12825	0.176371	0.10736	0.094962	0.12825	0.12825	0.0999124	0.147106	0.0889973	0.10736	0.115769	0.176371	0.147106	0.223744	0.147106	0.176371	0.147106	0.12825	0.115769	0.176371	0.10736	0.176371	0.101627	0.176371
Polydactyly	DOID:1148	0.10736	0.10736	0.115769	NA	0.10736	0.115769	0.115769	NA	0.12825	0.0943727	0.147106	0.115769	0.147106	0.12825	NA	0.115769	0.12825	0.115769	0.115769	0.12825	0.101627	0.12825	0.115769	0.12825	0.12825	0.176371	0.10736	0.094962	0.12825	0.12825	0.0999124	0.147106	0.0889973	0.10736	0.115769	0.176371	0.147106	0.223744	0.147106	0.176371	0.147106	0.12825	0.115769	0.176371	0.10736	0.176371	0.101627	0.176371
Hyperostosis	DOID:205	0.0322586	0.37258	0.0934083	NA	0.0322586	0.0934083	0.0384622	NA	0.0476199	0.0781974	0.148977	0.0934083	0.0613433	0.115648	NA	0.0934083	0.115648	0.0934083	0.0934083	0.0476199	0.0280133	0.115648	0.0384622	0.115648	0.115648	0.0823791	0.0783424	0.056008	0.0476199	0.212832	0.0822137	0.0613433	0.0839745	0.0783424	0.0934083	0.0823791	0.148977	0.115769	0.148977	0.0823791	0.148977	0.0476199	0.0934083	0.200064	0.0783424	0.200064	0.0680322	0.0823791
Cushing Syndrome	DOID:12252	0.0322586	0.0783424	0.0934083	NA	0.0322586	0.0934083	0.0384622	NA	0.0476199	0.0781974	0.148977	0.0934083	0.0613433	0.115648	NA	0.0934083	0.115648	0.0934083	0.0934083	0.0476199	0.0280133	0.833333	0.0384622	0.115648	0.212832	0.0823791	0.0783424	0.056008	0.0476199	0.115648	0.0822137	0.0613433	0.0839745	0.0783424	0.0934083	0.0823791	0.274167	0.115769	0.708501	0.0823791	0.148977	0.0476199	0.0934083	0.200064	0.0783424	0.200064	0.0680322	0.0823791
Hypophosphatemia, Familial	DOID:4332	NA	NA	NA	NA	NA	NA	NA	NA	NA	NA	NA	NA	NA	NA	NA	NA	NA	NA	NA	NA	NA	NA	NA	NA	NA	NA	NA	NA	NA	NA	NA	NA	NA	NA	NA	NA	NA	NA	NA	NA	NA	NA	NA	NA	NA	NA	NA	NA
Olivopontocerebellar Atrophies	DOID:14784	0.0262177	0.0636715	0.37258	NA	0.0262177	0.0783424	0.0322586	NA	0.0411723	0.12096	0.132409	0.144176	0.0545214	0.184015	NA	0.0783424	0.184015	0.238225	0.144176	0.0411723	0.0220824	0.09999	0.0322586	0.09999	0.09999	0.0749632	0.0636715	0.0771343	0.0411723	0.09999	0.0690634	0.0545214	0.273855	0.117177	0.0783424	0.0749632	0.132409	0.10736	0.132409	0.0749632	0.132409	0.0411723	0.0783424	0.182054	0.117177	0.33504	0.163075	0.0749632
Bile Duct Neoplasms	DOID:4606	0.238225	0.0322586	0.0384622	NA	0.238225	0.0384622	0.673076	NA	0.115648	0.0321989	0.0613433	0.0384622	0.0613433	0.0476199	NA	0.0384622	0.0476199	0.0384622	0.0384622	0.549999	0.206874	0.0476199	0.284037	0.0476199	0.0476199	0.0823791	0.0322586	0.0230621	0.0476199	0.0476199	0.0338527	0.0613433	0.0345777	0.0322586	0.0384622	0.0823791	0.0613433	0.115769	0.0613433	0.0823791	0.0613433	0.0476199	0.0384622	0.0823791	0.0322586	0.0823791	0.0280133	0.0823791
Myopathies, Nemaline	DOID:3191	0.0262177	0.117177	0.0783424	NA	0.0262177	0.0783424	0.0322586	NA	0.0411723	0.065727	0.132409	0.0783424	0.0545214	0.09999	NA	0.0783424	0.09999	0.0783424	0.0783424	0.0411723	0.0220824	0.09999	0.0322586	0.09999	0.09999	0.0749632	0.0636715	0.0419131	0.0411723	0.720502	0.0690634	0.0545214	0.0728749	0.0636715	0.0783424	0.0749632	0.132409	0.10736	0.132409	0.0749632	0.132409	0.0411723	0.0783424	0.182054	0.0636715	0.182054	0.0536287	0.0749632
Blindness	DOID:1432	0.0262177	0.0636715	0.144176	NA	0.0262177	0.0783424	0.0322586	NA	0.0411723	0.634641	0.132409	0.564516	0.0545214	0.184015	NA	0.0783424	0.184015	0.144176	0.564516	0.0411723	0.0220824	0.09999	0.0322586	0.09999	0.09999	0.0749632	0.0636715	0.448709	0.0411723	0.09999	0.0690634	0.0545214	0.134114	0.458801	0.0783424	0.0749632	0.132409	0.10736	0.132409	0.0749632	0.132409	0.0411723	0.0783424	0.182054	0.302808	0.33504	0.0986948	0.0749632
Alcoholism	DOID:1574	0.0545214	0.0545214	0.0613433	NA	0.0545214	0.0613433	0.0613433	NA	0.0714299	0.0509475	0.0865818	0.0613433	0.21027	0.0714299	NA	0.0613433	0.0714299	0.0613433	0.0613433	0.0714299	0.049858	0.0714299	0.0613433	0.0714299	0.0714299	0.109892	0.0545214	0.0444246	0.0714299	0.0714299	0.0536764	0.0865818	0.051166	0.0545214	0.0613433	0.109892	0.0865818	0.147106	0.0865818	0.109892	0.0865818	0.0714299	0.0613433	0.109892	0.0545214	0.109892	0.049858	0.109892
Medulloblastoma	DOID:3861	0.142026	0.0192322	0.0250878	NA	0.142026	0.0250878	0.185269	NA	0.0819002	0.0211008	0.0466468	0.0250878	0.0466468	0.0337236	NA	0.0250878	0.0337236	0.0250878	0.0250878	0.249044	0.112415	0.0337236	0.185269	0.0337236	0.0337236	0.0664141	0.0192322	0.0105433	0.0337236	0.0337236	0.0221572	0.0466468	0.0246847	0.0192322	0.0250878	0.0664141	0.0466468	0.0976859	0.0466468	0.0664141	0.0466468	0.0337236	0.0250878	0.0664141	0.0192322	0.0664141	0.0152224	0.0664141
Mevalonate Kinase Deficiency	DOID:0050452	0.0545214	0.0545214	0.0613433	NA	0.0545214	0.0613433	0.0613433	NA	0.0714299	0.0509475	0.0865818	0.0613433	0.0865818	0.0714299	NA	0.0613433	0.0714299	0.0613433	0.0613433	0.0714299	0.049858	0.0714299	0.0613433	0.0714299	0.0714299	0.109892	0.0545214	0.0444246	0.0714299	0.0714299	0.0536764	0.386968	0.051166	0.0545214	0.0613433	0.109892	0.0865818	0.147106	0.0865818	0.491152	0.0865818	0.0714299	0.0613433	0.109892	0.0545214	0.109892	0.049858	0.491152
Diabetic Angiopathies	DOID:11713	0.0411723	0.09999	0.115648	NA	0.0411723	0.212832	0.0476199	NA	0.0571439	0.0965077	0.173473	0.115648	0.0714299	0.138778	NA	0.115648	0.138778	0.115648	0.115648	0.0571439	0.0367619	0.138778	0.0476199	0.138778	0.138778	0.0933603	0.304051	0.0767921	0.0571439	0.138778	0.10155	0.0714299	0.10022	0.09999	0.212832	0.0933603	0.173473	0.12825	0.173473	0.0933603	0.173473	0.0571439	0.549999	0.226732	0.09999	0.226732	0.089279	0.0933603
Prostatic Hyperplasia	DOID:2883	0.0783424	0.0322586	0.0384622	NA	0.0783424	0.0384622	0.0934083	NA	0.351665	0.0321989	0.0613433	0.0384622	0.0613433	0.0476199	NA	0.0384622	0.0476199	0.0384622	0.0384622	0.115648	0.0680322	0.0476199	0.0934083	0.0476199	0.0476199	0.0823791	0.0322586	0.0230621	0.0476199	0.0476199	0.0338527	0.0613433	0.0345777	0.0322586	0.0384622	0.0823791	0.0613433	0.115769	0.0613433	0.0823791	0.0613433	0.0476199	0.0384622	0.0823791	0.0322586	0.0823791	0.0280133	0.0823791
Xeroderma Pigmentosum	DOID:0050427	0.0411723	0.0411723	0.0476199	NA	0.0411723	0.0476199	0.0476199	NA	0.0571439	0.0397384	0.0714299	0.0476199	0.0714299	0.0571439	NA	0.0476199	0.0571439	0.0476199	0.0476199	0.0571439	0.0367619	0.0571439	0.0476199	0.0571439	0.0571439	0.417263	0.0411723	0.0316203	0.421999	0.0571439	0.0418146	0.0714299	0.0412673	0.0411723	0.0476199	0.0933603	0.0714299	0.12825	0.0714299	0.0933603	0.0714299	0.659999	0.0476199	0.0933603	0.0411723	0.0933603	0.0367619	0.0933603
Cervical Intraepithelial Neoplasia	DOID:8991	0.132409	0.0545214	0.0613433	NA	0.132409	0.0613433	0.148977	NA	0.173473	0.0509475	0.0865818	0.0613433	0.0865818	0.0714299	NA	0.0613433	0.0714299	0.0613433	0.0613433	0.173473	0.121084	0.0714299	0.148977	0.0714299	0.0714299	0.109892	0.0545214	0.0444246	0.0714299	0.0714299	0.0536764	0.0865818	0.051166	0.0545214	0.0613433	0.109892	0.0865818	0.147106	0.0865818	0.109892	0.0865818	0.0714299	0.0613433	0.109892	0.0545214	0.109892	0.049858	0.109892
Proteinuria	DOID:576	0.0545214	0.132409	0.148977	NA	0.0545214	0.148977	0.0613433	NA	0.0714299	0.12373	0.21027	0.148977	0.0865818	0.173473	NA	0.148977	0.173473	0.148977	0.148977	0.0714299	0.049858	0.173473	0.0613433	0.173473	0.173473	0.109892	0.132409	0.107888	0.0714299	0.173473	0.130357	0.0865818	0.12426	0.132409	0.148977	0.109892	0.21027	0.147106	0.21027	0.109892	0.21027	0.0714299	0.148977	0.266882	0.132409	0.266882	0.121084	0.109892
Brucellosis	DOID:11077	0.0545214	0.0545214	0.0613433	NA	0.0545214	0.0613433	0.0613433	NA	0.0714299	0.0509475	0.0865818	0.0613433	0.0865818	0.0714299	NA	0.0613433	0.0714299	0.0613433	0.0613433	0.0714299	0.049858	0.0714299	0.0613433	0.0714299	0.0714299	0.109892	0.0545214	0.0444246	0.0714299	0.0714299	0.0536764	0.0865818	0.051166	0.0545214	0.0613433	0.266882	0.0865818	0.147106	0.0865818	0.109892	0.0865818	0.0714299	0.0613433	0.109892	0.0545214	0.109892	0.049858	0.109892
Pterygium	DOID:0002116	0.0262177	0.0636715	0.144176	NA	0.0262177	0.0783424	0.0322586	NA	0.0411723	0.445196	0.132409	0.564516	0.0545214	0.184015	NA	0.0783424	0.184015	0.144176	0.564516	0.0411723	0.0220824	0.09999	0.0322586	0.09999	0.09999	0.0749632	0.0636715	0.302016	0.0411723	0.09999	0.0690634	0.0545214	0.134114	0.458801	0.0783424	0.0749632	0.132409	0.10736	0.132409	0.0749632	0.132409	0.0411723	0.0783424	0.182054	0.302808	0.33504	0.0986948	0.0749632
Cardiomyopathy, Dilated	DOID:12930	0.0282938	0.109133	0.0817922	NA	0.0282938	0.248715	0.0336792	NA	0.0415966	0.0698882	0.12966	0.0817922	0.0533895	0.10102	NA	0.0817922	0.10102	0.0817922	0.0817922	0.0415966	0.0245981	0.10102	0.0336792	0.10102	0.10102	0.0713009	0.126456	0.0492449	0.0415966	0.596276	0.073079	0.0533895	0.0759851	0.0687134	0.248715	0.0713009	0.12966	0.0993274	0.12966	0.0713009	0.12966	0.0415966	0.150525	0.173159	0.0687134	0.173159	0.0597381	0.0713009
Glucosephosphate Dehydrogenase Deficiency	DOID:2862	0.0545214	0.0545214	0.0613433	NA	0.0545214	0.0613433	0.0613433	NA	0.0714299	0.0509475	0.0865818	0.0613433	0.0865818	0.0714299	NA	0.0613433	0.0714299	0.0613433	0.0613433	0.0714299	0.049858	0.0714299	0.0613433	0.0714299	0.0714299	0.109892	0.0545214	0.0444246	0.0714299	0.0714299	0.0536764	0.386968	0.051166	0.0545214	0.0613433	0.109892	0.0865818	0.147106	0.0865818	0.491152	0.0865818	0.0714299	0.0613433	0.109892	0.0545214	0.109892	0.049858	0.491152
Myocardial Infarction	DOID:5844	0.0322586	0.0783424	0.0934083	NA	0.0322586	0.171903	0.0384622	NA	0.0476199	0.0781974	0.148977	0.0934083	0.0613433	0.115648	NA	0.0934083	0.115648	0.0934083	0.0934083	0.0476199	0.0280133	0.115648	0.0384622	0.115648	0.115648	0.0823791	0.838709	0.056008	0.0476199	0.115648	0.0822137	0.0613433	0.0839745	0.0783424	0.171903	0.0823791	0.148977	0.115769	0.148977	0.0823791	0.148977	0.0476199	0.284037	0.200064	0.0783424	0.200064	0.0680322	0.0823791
Cleft Palate	DOID:674	0.0749632	0.0749632	0.0823791	NA	0.0749632	0.0823791	0.0823791	NA	0.0933603	0.0679241	0.109892	0.0823791	0.109892	0.0933603	NA	0.0823791	0.0933603	0.0823791	0.0823791	0.0933603	0.0698989	0.0933603	0.0823791	0.0933603	0.0933603	0.135413	0.0749632	0.0640035	0.0933603	0.0933603	0.0716984	0.109892	0.066053	0.0749632	0.0823791	0.135413	0.109892	0.176371	0.109892	0.135413	0.109892	0.0933603	0.0823791	0.135413	0.0749632	0.135413	0.0698989	0.135413
Myopathy, Central Core	DOID:3529	0.0262177	0.117177	0.0783424	NA	0.0262177	0.0783424	0.0322586	NA	0.0411723	0.065727	0.132409	0.0783424	0.0545214	0.09999	NA	0.0783424	0.09999	0.0783424	0.0783424	0.0411723	0.0220824	0.09999	0.0322586	0.09999	0.09999	0.0749632	0.0636715	0.0419131	0.0411723	0.720502	0.0690634	0.0545214	0.0728749	0.0636715	0.0783424	0.0749632	0.132409	0.10736	0.132409	0.0749632	0.132409	0.0411723	0.0783424	0.182054	0.0636715	0.182054	0.0536287	0.0749632
Bacterial Infections	DOID:104	0.10736	0.10736	0.115769	NA	0.10736	0.115769	0.115769	NA	0.12825	0.0943727	0.147106	0.115769	0.147106	0.12825	NA	0.115769	0.12825	0.115769	0.115769	0.12825	0.101627	0.12825	0.115769	0.12825	0.12825	0.176371	0.10736	0.094962	0.12825	0.12825	0.0999124	0.147106	0.0889973	0.10736	0.115769	0.428329	0.147106	0.223744	0.147106	0.176371	0.147106	0.12825	0.115769	0.176371	0.10736	0.176371	0.101627	0.176371
Hereditary Sensory and Autonomic Neuropathies	DOID:2491	0.0411723	0.09999	0.212832	NA	0.0411723	0.115648	0.0476199	NA	0.0571439	0.177607	0.173473	0.212832	0.0714299	0.421999	NA	0.115648	0.421999	0.212832	0.212832	0.0571439	0.0367619	0.138778	0.0476199	0.138778	0.138778	0.0933603	0.09999	0.141323	0.0571439	0.138778	0.10155	0.0714299	0.304752	0.184015	0.115648	0.0933603	0.173473	0.12825	0.173473	0.0933603	0.173473	0.0571439	0.115648	0.226732	0.184015	0.417263	0.164303	0.0933603
Bone Neoplasms	DOID:184	0.564516	0.0322586	0.0384622	NA	0.564516	0.0384622	0.284037	NA	0.115648	0.0321989	0.0613433	0.0384622	0.0613433	0.0476199	NA	0.0384622	0.0476199	0.0384622	0.0384622	0.351665	0.206874	0.0476199	0.284037	0.0476199	0.0476199	0.0823791	0.0322586	0.0230621	0.0476199	0.0476199	0.0338527	0.0613433	0.0345777	0.0322586	0.0384622	0.0823791	0.0613433	0.115769	0.0613433	0.0823791	0.0613433	0.0476199	0.0384622	0.0823791	0.0322586	0.0823791	0.0280133	0.0823791
Polycystic Kidney, Autosomal Dominant	DOID:5937	NA	NA	NA	NA	NA	NA	NA	NA	NA	NA	NA	NA	NA	NA	NA	NA	NA	NA	NA	NA	NA	NA	NA	NA	NA	NA	NA	NA	NA	NA	NA	NA	NA	NA	NA	NA	NA	NA	NA	NA	NA	NA	NA	NA	NA	NA	NA	NA
Arthritis, Rheumatoid	DOID:7148	0.0262177	0.458801	0.0783424	NA	0.0262177	0.0783424	0.0322586	NA	0.0411723	0.065727	0.132409	0.0783424	0.0545214	0.09999	NA	0.0783424	0.09999	0.0783424	0.0783424	0.0411723	0.0220824	0.09999	0.0322586	0.09999	0.09999	0.0749632	0.0636715	0.0419131	0.0411723	0.184015	0.0690634	0.0545214	0.0728749	0.0636715	0.0783424	0.0749632	0.132409	0.10736	0.132409	0.0749632	0.132409	0.0411723	0.0783424	0.182054	0.0636715	0.182054	0.0536287	0.0749632
Motor Skills Disorders	DOID:9923	0.0545214	0.0545214	0.0613433	NA	0.0545214	0.0613433	0.0613433	NA	0.0714299	0.0509475	0.0865818	0.0613433	0.21027	0.0714299	NA	0.0613433	0.0714299	0.0613433	0.0613433	0.0714299	0.049858	0.0714299	0.0613433	0.0714299	0.0714299	0.109892	0.0545214	0.0444246	0.0714299	0.0714299	0.0536764	0.0865818	0.051166	0.0545214	0.0613433	0.109892	0.0865818	0.147106	0.0865818	0.109892	0.0865818	0.0714299	0.0613433	0.109892	0.0545214	0.109892	0.049858	0.109892
Telangiectasia, Hereditary Hemorrhagic	DOID:1270	0.0411723	0.0411723	0.0476199	NA	0.0411723	0.0476199	0.0476199	NA	0.0571439	0.0397384	0.0714299	0.0476199	0.0714299	0.0571439	NA	0.0476199	0.0571439	0.0476199	0.0476199	0.0571439	0.0367619	0.0571439	0.0476199	0.0571439	0.0571439	0.417263	0.0411723	0.0316203	0.659999	0.0571439	0.0418146	0.0714299	0.0412673	0.0411723	0.0476199	0.0933603	0.0714299	0.12825	0.0714299	0.0933603	0.0714299	0.421999	0.0476199	0.0933603	0.0411723	0.0933603	0.0367619	0.0933603
Darier Disease	DOID:2734	0.0411723	0.09999	0.115648	NA	0.0411723	0.115648	0.0476199	NA	0.0571439	0.0965077	0.173473	0.115648	0.0714299	0.138778	NA	0.115648	0.138778	0.115648	0.115648	0.0571439	0.0367619	0.138778	0.0476199	0.138778	0.138778	0.0933603	0.09999	0.0767921	0.0571439	0.138778	0.10155	0.0714299	0.10022	0.09999	0.115648	0.0933603	0.173473	0.12825	0.173473	0.0933603	0.527499	0.0571439	0.115648	0.689451	0.09999	0.226732	0.089279	0.0933603
Keratoconus	DOID:10126	0.0262177	0.0636715	0.144176	NA	0.0262177	0.0783424	0.0322586	NA	0.0411723	0.445196	0.132409	0.564516	0.0545214	0.184015	NA	0.0783424	0.184015	0.144176	0.564516	0.0411723	0.0220824	0.09999	0.0322586	0.09999	0.09999	0.0749632	0.0636715	0.302016	0.0411723	0.09999	0.0690634	0.0545214	0.134114	0.458801	0.0783424	0.0749632	0.132409	0.10736	0.132409	0.0749632	0.132409	0.0411723	0.0783424	0.182054	0.302808	0.33504	0.0986948	0.0749632
Colorectal Neoplasms, Hereditary Nonpolyposis	DOID:3883	0.0411723	0.0411723	0.0476199	NA	0.0411723	0.0476199	0.0476199	NA	0.0571439	0.0397384	0.0714299	0.0476199	0.0714299	0.0571439	NA	0.0476199	0.0571439	0.0476199	0.0476199	0.0571439	0.0367619	0.0571439	0.0476199	0.0571439	0.0571439	0.417263	0.0411723	0.0316203	0.659999	0.0571439	0.0418146	0.0714299	0.0412673	0.0411723	0.0476199	0.0933603	0.0714299	0.12825	0.0714299	0.0933603	0.0714299	0.421999	0.0476199	0.0933603	0.0411723	0.0933603	0.0367619	0.0933603
Nephritis, Hereditary	DOID:10983	0.0411723	0.0411723	0.0476199	NA	0.0411723	0.0476199	0.0476199	NA	0.0571439	0.0397384	0.0714299	0.0476199	0.0714299	0.0571439	NA	0.0476199	0.0571439	0.0476199	0.0476199	0.0571439	0.0367619	0.0571439	0.0476199	0.0571439	0.0571439	0.417263	0.0411723	0.0316203	0.421999	0.0571439	0.0418146	0.0714299	0.0412673	0.0411723	0.0476199	0.0933603	0.0714299	0.12825	0.0714299	0.0933603	0.0714299	0.659999	0.0476199	0.0933603	0.0411723	0.0933603	0.0367619	0.0933603
Leishmaniasis, Visceral	DOID:9146	0.0411723	0.0411723	0.0476199	NA	0.0411723	0.0476199	0.0476199	NA	0.0571439	0.0397384	0.0714299	0.0476199	0.0714299	0.0571439	NA	0.0476199	0.0571439	0.0476199	0.0476199	0.0571439	0.0367619	0.0571439	0.0476199	0.0571439	0.0571439	0.0933603	0.0411723	0.0316203	0.0571439	0.0571439	0.0418146	0.0714299	0.0412673	0.0411723	0.0476199	0.226732	0.0714299	0.12825	0.0714299	0.0933603	0.0714299	0.0571439	0.0476199	0.0933603	0.0411723	0.0933603	0.0367619	0.0933603
Sexual Dysfunctions, Psychological	DOID:13868	0.0545214	0.0545214	0.0613433	NA	0.0545214	0.0613433	0.0613433	NA	0.0714299	0.0509475	0.0865818	0.0613433	0.21027	0.0714299	NA	0.0613433	0.0714299	0.0613433	0.0613433	0.0714299	0.049858	0.0714299	0.0613433	0.0714299	0.0714299	0.109892	0.0545214	0.0444246	0.0714299	0.0714299	0.0536764	0.0865818	0.051166	0.0545214	0.0613433	0.109892	0.0865818	0.147106	0.0865818	0.109892	0.0865818	0.0714299	0.0613433	0.109892	0.0545214	0.109892	0.049858	0.109892
Congenital Hypothyroidism	DOID:0050328	0.0411723	0.09999	0.115648	NA	0.0411723	0.115648	0.0476199	NA	0.0571439	0.0965077	0.173473	0.115648	0.0714299	0.138778	NA	0.115648	0.138778	0.115648	0.115648	0.0571439	0.0367619	0.255398	0.0476199	0.138778	0.255398	0.0933603	0.09999	0.0767921	0.0571439	0.138778	0.10155	0.0714299	0.10022	0.09999	0.115648	0.0933603	0.319248	0.12825	0.319248	0.0933603	0.173473	0.0571439	0.115648	0.226732	0.09999	0.226732	0.089279	0.0933603
Anus Diseases	DOID:3128	0.0411723	0.09999	0.115648	NA	0.0411723	0.115648	0.0476199	NA	0.0571439	0.0965077	0.527499	0.115648	0.0714299	0.138778	NA	0.115648	0.138778	0.115648	0.115648	0.0571439	0.0367619	0.138778	0.0476199	0.138778	0.138778	0.0933603	0.09999	0.0767921	0.0571439	0.138778	0.10155	0.0714299	0.10022	0.09999	0.115648	0.0933603	0.173473	0.12825	0.173473	0.0933603	0.173473	0.0571439	0.115648	0.226732	0.09999	0.226732	0.089279	0.0933603
Infertility	DOID:5223	0.0749632	0.182054	0.200064	NA	0.0749632	0.200064	0.0823791	NA	0.0933603	0.164959	0.266882	0.200064	0.109892	0.226732	NA	0.200064	0.226732	0.200064	0.200064	0.0933603	0.0698989	0.226732	0.0823791	0.226732	0.226732	0.135413	0.182054	0.155437	0.0933603	0.226732	0.174125	0.109892	0.160414	0.182054	0.200064	0.135413	0.266882	0.176371	0.266882	0.135413	0.266882	0.0933603	0.200064	0.328859	0.182054	0.328859	0.169754	0.135413
Glycogen Storage Disease Type I	DOID:2749	0.0322586	0.0322586	0.0384622	NA	0.0322586	0.0384622	0.0384622	NA	0.0476199	0.0321989	0.0613433	0.0384622	0.0613433	0.0476199	NA	0.0384622	0.0476199	0.0384622	0.0384622	0.0476199	0.0280133	0.0476199	0.0384622	0.0476199	0.0476199	0.0823791	0.0322586	0.0230621	0.0476199	0.0476199	0.0338527	0.274167	0.0345777	0.0322586	0.0384622	0.0823791	0.0613433	0.115769	0.0613433	0.368184	0.0613433	0.0476199	0.0384622	0.0823791	0.0322586	0.0823791	0.0280133	0.368184
Uveitis	DOID:13141	0.0262177	0.0636715	0.144176	NA	0.0262177	0.0783424	0.0322586	NA	0.0411723	0.445196	0.132409	0.564516	0.0545214	0.184015	NA	0.0783424	0.184015	0.144176	0.564516	0.0411723	0.0220824	0.09999	0.0322586	0.09999	0.09999	0.0749632	0.0636715	0.302016	0.0411723	0.09999	0.0690634	0.0545214	0.134114	0.458801	0.0783424	0.0749632	0.132409	0.10736	0.132409	0.0749632	0.132409	0.0411723	0.0783424	0.182054	0.302808	0.33504	0.0986948	0.0749632
Glaucoma, Open-Angle	DOID:1067	0.0192322	0.0467067	0.112127	NA	0.0192322	0.0609274	0.0250878	NA	0.0337236	0.480502	0.113285	0.439028	0.0466468	0.150724	NA	0.0609274	0.150724	0.112127	0.439028	0.0337236	0.0152224	0.0819002	0.0250878	0.0819002	0.0819002	0.0664141	0.0467067	0.402145	0.0337236	0.0819002	0.0538103	0.0466468	0.110325	0.336557	0.0609274	0.0664141	0.113285	0.0976859	0.113285	0.0664141	0.113285	0.0337236	0.0609274	0.161291	0.222127	0.29683	0.0680347	0.0664141
Aphasia	DOID:0060046	0.0322586	0.0322586	0.0384622	NA	0.0322586	0.0384622	0.0384622	NA	0.0476199	0.0321989	0.0613433	0.0384622	0.148977	0.0476199	NA	0.0384622	0.0476199	0.0384622	0.0384622	0.0476199	0.0280133	0.0476199	0.0384622	0.0476199	0.0476199	0.0823791	0.0322586	0.0230621	0.0476199	0.0476199	0.0338527	0.0613433	0.0345777	0.0322586	0.0384622	0.0823791	0.0613433	0.115769	0.0613433	0.0823791	0.0613433	0.0476199	0.0384622	0.0823791	0.0322586	0.0823791	0.0280133	0.0823791
Tietze's Syndrome	DOID:14021	0.0192322	0.500027	0.0609274	NA	0.0192322	0.0609274	0.0250878	NA	0.0337236	0.0512448	0.113285	0.0609274	0.0466468	0.0819002	NA	0.0609274	0.0819002	0.0609274	0.0609274	0.0337236	0.0152224	0.0819002	0.0250878	0.0819002	0.0819002	0.0664141	0.0467067	0.0256052	0.0337236	0.150724	0.0538103	0.0466468	0.0599485	0.0467067	0.0609274	0.0664141	0.113285	0.0976859	0.113285	0.0664141	0.113285	0.0337236	0.0609274	0.161291	0.0467067	0.161291	0.0369686	0.0664141
Mood Disorders	DOID:3324	0.0749632	0.0749632	0.0823791	NA	0.0749632	0.0823791	0.0823791	NA	0.0933603	0.0679241	0.109892	0.0823791	0.811538	0.0933603	NA	0.0823791	0.0933603	0.0823791	0.0823791	0.0933603	0.0698989	0.0933603	0.0823791	0.0933603	0.0933603	0.135413	0.0749632	0.0640035	0.0933603	0.0933603	0.0716984	0.109892	0.066053	0.0749632	0.0823791	0.135413	0.109892	0.176371	0.109892	0.135413	0.109892	0.0933603	0.0823791	0.135413	0.0749632	0.135413	0.0698989	0.135413
Frasier Syndrome	DOID:0050438	0.0411723	0.0411723	0.0476199	NA	0.0411723	0.0476199	0.0476199	NA	0.0571439	0.0397384	0.0714299	0.0476199	0.0714299	0.0571439	NA	0.0476199	0.0571439	0.0476199	0.0476199	0.0571439	0.0367619	0.0571439	0.0476199	0.0571439	0.0571439	0.417263	0.0411723	0.0316203	0.659999	0.0571439	0.0418146	0.0714299	0.0412673	0.0411723	0.0476199	0.0933603	0.0714299	0.12825	0.0714299	0.0933603	0.0714299	0.421999	0.0476199	0.0933603	0.0411723	0.0933603	0.0367619	0.0933603
Epilepsy, Generalized	DOID:1827	0.0322586	0.0783424	0.284037	NA	0.0322586	0.0934083	0.0384622	NA	0.0476199	0.143909	0.148977	0.171903	0.0613433	0.212832	NA	0.0934083	0.212832	0.44423	0.171903	0.0476199	0.0280133	0.115648	0.0384622	0.115648	0.115648	0.0823791	0.0783424	0.103074	0.0476199	0.115648	0.0822137	0.0613433	0.225108	0.144176	0.0934083	0.0823791	0.148977	0.115769	0.148977	0.0823791	0.148977	0.0476199	0.0934083	0.200064	0.144176	0.368184	0.490223	0.0823791
Stereotypic Movement Disorder	DOID:2303	0.0545214	0.0545214	0.0613433	NA	0.0545214	0.0613433	0.0613433	NA	0.0714299	0.0509475	0.0865818	0.0613433	0.21027	0.0714299	NA	0.0613433	0.0714299	0.0613433	0.0613433	0.0714299	0.049858	0.0714299	0.0613433	0.0714299	0.0714299	0.109892	0.0545214	0.0444246	0.0714299	0.0714299	0.0536764	0.0865818	0.051166	0.0545214	0.0613433	0.109892	0.0865818	0.147106	0.0865818	0.109892	0.0865818	0.0714299	0.0613433	0.109892	0.0545214	0.109892	0.049858	0.109892
Myotonic Disorders	DOID:450	0.0262177	0.117177	0.0783424	NA	0.0262177	0.0783424	0.0322586	NA	0.0411723	0.065727	0.132409	0.0783424	0.0545214	0.09999	NA	0.0783424	0.09999	0.0783424	0.0783424	0.0411723	0.0220824	0.09999	0.0322586	0.09999	0.09999	0.0749632	0.0636715	0.0419131	0.0411723	0.720502	0.0690634	0.0545214	0.0728749	0.0636715	0.0783424	0.0749632	0.132409	0.10736	0.132409	0.0749632	0.132409	0.0411723	0.0783424	0.182054	0.0636715	0.182054	0.0536287	0.0749632
Hyperinsulinism	DOID:2018	0.0318791	0.0774206	0.0892681	NA	0.0318791	0.0892681	0.0367575	NA	0.0439086	0.0774163	0.132392	0.0892681	0.0545145	0.106635	NA	0.0892681	0.106635	0.0892681	0.0892681	0.0439086	0.0285246	0.196245	0.0367575	0.106635	0.196245	0.070519	0.0774206	0.0597331	0.0439086	0.106635	0.0806277	0.132392	0.0823045	0.0774206	0.0892681	0.070519	0.243646	0.0953135	0.243646	0.17126	0.132392	0.0439086	0.0892681	0.17126	0.0774206	0.17126	0.0692741	0.17126
Hyperopia	DOID:9834	0.0262177	0.0636715	0.144176	NA	0.0262177	0.0783424	0.0322586	NA	0.0411723	0.445196	0.132409	0.838709	0.0545214	0.184015	NA	0.0783424	0.184015	0.144176	0.564516	0.0411723	0.0220824	0.09999	0.0322586	0.09999	0.09999	0.0749632	0.0636715	0.302016	0.0411723	0.09999	0.0690634	0.0545214	0.134114	0.458801	0.0783424	0.0749632	0.132409	0.10736	0.132409	0.0749632	0.132409	0.0411723	0.0783424	0.182054	0.302808	0.33504	0.0986948	0.0749632
Appendicitis	DOID:8337	0.0411723	0.09999	0.115648	NA	0.0411723	0.115648	0.0476199	NA	0.0571439	0.0965077	0.527499	0.115648	0.0714299	0.138778	NA	0.115648	0.138778	0.115648	0.115648	0.0571439	0.0367619	0.138778	0.0476199	0.138778	0.138778	0.0933603	0.09999	0.0767921	0.0571439	0.138778	0.10155	0.0714299	0.10022	0.09999	0.115648	0.0933603	0.173473	0.12825	0.173473	0.0933603	0.173473	0.0571439	0.115648	0.226732	0.09999	0.226732	0.089279	0.0933603
Rheumatic Diseases	DOID:204	0.0545214	0.402632	0.148977	NA	0.0545214	0.148977	0.0613433	NA	0.0714299	0.12373	0.21027	0.148977	0.0865818	0.173473	NA	0.148977	0.173473	0.148977	0.148977	0.0714299	0.049858	0.173473	0.0613433	0.173473	0.173473	0.109892	0.132409	0.107888	0.0714299	0.319248	0.130357	0.0865818	0.12426	0.132409	0.148977	0.109892	0.21027	0.147106	0.21027	0.109892	0.21027	0.0714299	0.148977	0.266882	0.132409	0.266882	0.121084	0.109892
Muscular Dystrophy, Facioscapulohumeral	DOID:11727	0.0262177	0.117177	0.0783424	NA	0.0262177	0.0783424	0.0322586	NA	0.0411723	0.065727	0.132409	0.0783424	0.0545214	0.09999	NA	0.0783424	0.09999	0.0783424	0.0783424	0.0411723	0.0220824	0.09999	0.0322586	0.09999	0.09999	0.0749632	0.0636715	0.0419131	0.0411723	0.720502	0.0690634	0.0545214	0.0728749	0.0636715	0.0783424	0.0749632	0.132409	0.10736	0.132409	0.0749632	0.132409	0.0411723	0.0783424	0.182054	0.0636715	0.182054	0.0536287	0.0749632
Muscular Dystrophies	DOID:9884	0.0322586	0.144176	0.0934083	NA	0.0322586	0.0934083	0.0384622	NA	0.0476199	0.0781974	0.148977	0.0934083	0.0613433	0.115648	NA	0.0934083	0.115648	0.0934083	0.0934083	0.0476199	0.0280133	0.115648	0.0384622	0.115648	0.115648	0.0823791	0.0783424	0.056008	0.0476199	0.833333	0.0822137	0.0613433	0.0839745	0.0783424	0.0934083	0.0823791	0.148977	0.115769	0.148977	0.0823791	0.148977	0.0476199	0.0934083	0.200064	0.0783424	0.200064	0.0680322	0.0823791
Progeria	DOID:3911	0.0411723	0.0411723	0.0476199	NA	0.0411723	0.0476199	0.0476199	NA	0.0571439	0.0397384	0.0714299	0.0476199	0.0714299	0.0571439	NA	0.0476199	0.0571439	0.0476199	0.0476199	0.0571439	0.0367619	0.0571439	0.0476199	0.0571439	0.0571439	0.417263	0.0411723	0.0316203	0.421999	0.0571439	0.0418146	0.0714299	0.0412673	0.0411723	0.0476199	0.0933603	0.0714299	0.12825	0.0714299	0.0933603	0.0714299	0.659999	0.0476199	0.0933603	0.0411723	0.0933603	0.0367619	0.0933603
Blood Coagulation Disorders	DOID:1247	0.0545214	0.132409	0.148977	NA	0.0545214	0.148977	0.0613433	NA	0.0714299	0.12373	0.21027	0.148977	0.0865818	0.173473	NA	0.148977	0.173473	0.148977	0.148977	0.0714299	0.049858	0.173473	0.0613433	0.173473	0.173473	0.109892	0.132409	0.107888	0.0714299	0.173473	0.396392	0.0865818	0.12426	0.132409	0.148977	0.109892	0.21027	0.147106	0.21027	0.109892	0.21027	0.0714299	0.148977	0.266882	0.132409	0.266882	0.121084	0.109892
Homocystinuria	DOID:9263	0.0545214	0.0545214	0.0613433	NA	0.0545214	0.0613433	0.0613433	NA	0.0714299	0.0509475	0.0865818	0.0613433	0.0865818	0.0714299	NA	0.0613433	0.0714299	0.0613433	0.0613433	0.0714299	0.049858	0.0714299	0.0613433	0.0714299	0.0714299	0.109892	0.0545214	0.0444246	0.0714299	0.0714299	0.0536764	0.386968	0.051166	0.0545214	0.0613433	0.109892	0.0865818	0.147106	0.0865818	0.491152	0.0865818	0.0714299	0.0613433	0.109892	0.0545214	0.109892	0.049858	0.491152
Brain Neoplasms	DOID:1319	0.238225	0.0322586	0.0384622	NA	0.238225	0.0384622	0.284037	NA	0.115648	0.0321989	0.0613433	0.0384622	0.0613433	0.0476199	NA	0.0384622	0.0476199	0.0384622	0.0384622	0.351665	0.206874	0.0476199	0.284037	0.0476199	0.0476199	0.0823791	0.0322586	0.0230621	0.0476199	0.0476199	0.0338527	0.0613433	0.0345777	0.0322586	0.0384622	0.0823791	0.0613433	0.115769	0.0613433	0.0823791	0.0613433	0.0476199	0.0384622	0.0823791	0.0322586	0.0823791	0.0280133	0.0823791
Rickets	DOID:10609	0.0322586	0.37258	0.0934083	NA	0.0322586	0.0934083	0.0384622	NA	0.0476199	0.0781974	0.148977	0.0934083	0.0613433	0.115648	NA	0.0934083	0.115648	0.0934083	0.0934083	0.0476199	0.0280133	0.115648	0.0384622	0.115648	0.115648	0.0823791	0.0783424	0.056008	0.0476199	0.212832	0.0822137	0.0613433	0.0839745	0.0783424	0.0934083	0.0823791	0.148977	0.115769	0.148977	0.0823791	0.148977	0.0476199	0.0934083	0.200064	0.0783424	0.200064	0.0680322	0.0823791
Colonic Diseases, Functional	DOID:3877	0.0411723	0.09999	0.115648	NA	0.0411723	0.115648	0.0476199	NA	0.0571439	0.0965077	0.527499	0.115648	0.0714299	0.138778	NA	0.115648	0.138778	0.115648	0.115648	0.0571439	0.0367619	0.138778	0.0476199	0.138778	0.138778	0.0933603	0.09999	0.0767921	0.0571439	0.138778	0.10155	0.0714299	0.10022	0.09999	0.115648	0.0933603	0.173473	0.12825	0.173473	0.0933603	0.173473	0.0571439	0.115648	0.226732	0.09999	0.226732	0.089279	0.0933603
Opioid-Related Disorders	DOID:2559	0.0411723	0.0411723	0.0476199	NA	0.0411723	0.0476199	0.0476199	NA	0.0571439	0.0397384	0.0714299	0.0476199	0.173473	0.0571439	NA	0.0476199	0.0571439	0.0476199	0.0476199	0.0571439	0.0367619	0.0571439	0.0476199	0.0571439	0.0571439	0.0933603	0.0411723	0.0316203	0.0571439	0.0571439	0.0418146	0.0714299	0.0412673	0.0411723	0.0476199	0.0933603	0.0714299	0.12825	0.0714299	0.0933603	0.0714299	0.0571439	0.0476199	0.0933603	0.0411723	0.0933603	0.0367619	0.0933603
Movement Disorders	DOID:480	0.0411723	0.09999	0.351665	NA	0.0411723	0.115648	0.0476199	NA	0.0571439	0.177607	0.173473	0.212832	0.0714299	0.255398	NA	0.115648	0.255398	0.549999	0.212832	0.0571439	0.0367619	0.138778	0.0476199	0.138778	0.138778	0.0933603	0.09999	0.141323	0.0571439	0.138778	0.10155	0.0714299	0.274072	0.184015	0.115648	0.0933603	0.173473	0.12825	0.173473	0.0933603	0.173473	0.0571439	0.115648	0.226732	0.184015	0.417263	0.424592	0.0933603
Hypoparathyroidism	DOID:11199	0.0432983	0.105153	0.117967	NA	0.0432983	0.117967	0.0485747	NA	0.0563205	0.101558	0.164736	0.117967	0.0678325	0.136778	NA	0.117967	0.136778	0.117967	0.117967	0.0563205	0.0396737	0.251718	0.0485747	0.136778	0.251718	0.0852598	0.105153	0.0860499	0.0563205	0.136778	0.177108	0.0678325	0.10423	0.105153	0.117967	0.0852598	0.500932	0.112391	0.30317	0.0852598	0.164736	0.0563205	0.117967	0.207059	0.105153	0.207059	0.0963504	0.0852598
Glycogen Storage Disease Type V	DOID:2746	0.0322586	0.0322586	0.0384622	NA	0.0322586	0.0384622	0.0384622	NA	0.0476199	0.0321989	0.0613433	0.0384622	0.0613433	0.0476199	NA	0.0384622	0.0476199	0.0384622	0.0384622	0.0476199	0.0280133	0.0476199	0.0384622	0.0476199	0.0476199	0.0823791	0.0322586	0.0230621	0.0476199	0.0476199	0.0338527	0.274167	0.0345777	0.0322586	0.0384622	0.0823791	0.0613433	0.115769	0.0613433	0.368184	0.0613433	0.0476199	0.0384622	0.0823791	0.0322586	0.0823791	0.0280133	0.368184
Hyperhomocysteinemia	DOID:9279	0.0545214	0.0545214	0.0613433	NA	0.0545214	0.0613433	0.0613433	NA	0.0714299	0.0509475	0.0865818	0.0613433	0.0865818	0.0714299	NA	0.0613433	0.0714299	0.0613433	0.0613433	0.0714299	0.049858	0.0714299	0.0613433	0.0714299	0.0714299	0.109892	0.0545214	0.0444246	0.0714299	0.0714299	0.0536764	0.386968	0.051166	0.0545214	0.0613433	0.109892	0.0865818	0.147106	0.0865818	0.491152	0.0865818	0.0714299	0.0613433	0.109892	0.0545214	0.109892	0.049858	0.491152
Myelodysplastic Syndromes	DOID:0050908	0.193613	0.0262177	0.0322586	NA	0.193613	0.0322586	0.238225	NA	0.09999	0.0270641	0.0545214	0.0322586	0.0545214	0.0411723	NA	0.0322586	0.0411723	0.0322586	0.0322586	0.304051	0.386435	0.0411723	0.238225	0.0411723	0.0411723	0.0749632	0.0262177	0.0172584	0.0411723	0.0411723	0.0284379	0.0545214	0.0300073	0.0262177	0.0322586	0.0749632	0.0545214	0.10736	0.0545214	0.0749632	0.0545214	0.0411723	0.0322586	0.0749632	0.0262177	0.0749632	0.0220824	0.0749632
Warts	DOID:11165	0.0749632	0.0749632	0.0823791	NA	0.0749632	0.0823791	0.0823791	NA	0.0933603	0.0679241	0.109892	0.0823791	0.109892	0.0933603	NA	0.0823791	0.0933603	0.0823791	0.0823791	0.0933603	0.0698989	0.0933603	0.0823791	0.0933603	0.0933603	0.135413	0.0749632	0.0640035	0.0933603	0.0933603	0.0716984	0.109892	0.066053	0.0749632	0.0823791	0.605211	0.109892	0.176371	0.109892	0.135413	0.109892	0.0933603	0.0823791	0.135413	0.0749632	0.135413	0.0698989	0.135413
Carcinoma, Renal Cell	DOID:4450	0.193613	0.0262177	0.0322586	NA	0.193613	0.0322586	0.238225	NA	0.09999	0.0270641	0.0545214	0.0322586	0.0545214	0.0411723	NA	0.0322586	0.0411723	0.0322586	0.0322586	0.304051	0.163075	0.0411723	0.238225	0.0411723	0.0411723	0.0749632	0.0262177	0.0172584	0.0411723	0.0411723	0.0284379	0.0545214	0.0300073	0.0262177	0.0322586	0.0749632	0.0545214	0.10736	0.0545214	0.0749632	0.0545214	0.0411723	0.0322586	0.0749632	0.0262177	0.0749632	0.0220824	0.0749632
Hemochromatosis	DOID:2352	0.0545214	0.0545214	0.0613433	NA	0.0545214	0.0613433	0.0613433	NA	0.0714299	0.0509475	0.0865818	0.0613433	0.0865818	0.0714299	NA	0.0613433	0.0714299	0.0613433	0.0613433	0.0714299	0.049858	0.0714299	0.0613433	0.0714299	0.0714299	0.109892	0.0545214	0.0444246	0.0714299	0.0714299	0.0536764	0.386968	0.051166	0.0545214	0.0613433	0.109892	0.0865818	0.147106	0.0865818	0.491152	0.0865818	0.0714299	0.0613433	0.109892	0.0545214	0.109892	0.049858	0.491152
Pelger-Huet Anomaly	DOID:9631	0.0411723	0.0411723	0.0476199	NA	0.0411723	0.0476199	0.0476199	NA	0.0571439	0.0397384	0.0714299	0.0476199	0.0714299	0.0571439	NA	0.0476199	0.0571439	0.0476199	0.0476199	0.0571439	0.0367619	0.0571439	0.0476199	0.0571439	0.0571439	0.417263	0.0411723	0.0316203	0.659999	0.0571439	0.0418146	0.0714299	0.0412673	0.0411723	0.0476199	0.0933603	0.0714299	0.12825	0.0714299	0.0933603	0.0714299	0.421999	0.0476199	0.0933603	0.0411723	0.0933603	0.0367619	0.0933603
Leiomyoma	DOID:127	0.132409	0.0545214	0.0613433	NA	0.132409	0.0613433	0.148977	NA	0.319248	0.0509475	0.0865818	0.0613433	0.0865818	0.0714299	NA	0.0613433	0.0714299	0.0613433	0.0613433	0.173473	0.121084	0.0714299	0.148977	0.0714299	0.0714299	0.109892	0.0545214	0.0444246	0.0714299	0.0714299	0.0536764	0.0865818	0.051166	0.0545214	0.0613433	0.109892	0.0865818	0.147106	0.0865818	0.109892	0.0865818	0.0714299	0.0613433	0.109892	0.0545214	0.109892	0.049858	0.109892
Ataxia Telangiectasia	DOID:12704	0.0411723	0.0411723	0.0476199	NA	0.0411723	0.0476199	0.0476199	NA	0.0571439	0.0397384	0.0714299	0.0476199	0.0714299	0.0571439	NA	0.0476199	0.0571439	0.0476199	0.0476199	0.0571439	0.0367619	0.0571439	0.0476199	0.0571439	0.0571439	0.417263	0.0411723	0.0316203	0.421999	0.0571439	0.0418146	0.0714299	0.0412673	0.0411723	0.0476199	0.0933603	0.0714299	0.12825	0.0714299	0.0933603	0.0714299	0.659999	0.0476199	0.0933603	0.0411723	0.0933603	0.0367619	0.0933603
Ectodermal Dysplasia	DOID:14693	0.0411723	0.0411723	0.0476199	NA	0.0411723	0.0476199	0.0476199	NA	0.0571439	0.0397384	0.0714299	0.0476199	0.0714299	0.0571439	NA	0.0476199	0.0571439	0.0476199	0.0476199	0.0571439	0.0367619	0.0571439	0.0476199	0.0571439	0.0571439	0.417263	0.0411723	0.0316203	0.659999	0.0571439	0.0418146	0.0714299	0.0412673	0.0411723	0.0476199	0.0933603	0.0714299	0.12825	0.0714299	0.0933603	0.0714299	0.421999	0.0476199	0.0933603	0.0411723	0.0933603	0.0367619	0.0933603
Muscular Atrophy	DOID:767	0.0322586	0.144176	0.0934083	NA	0.0322586	0.0934083	0.0384622	NA	0.0476199	0.0781974	0.148977	0.0934083	0.0613433	0.115648	NA	0.0934083	0.115648	0.0934083	0.0934083	0.0476199	0.0280133	0.115648	0.0384622	0.115648	0.115648	0.0823791	0.0783424	0.056008	0.0476199	0.833333	0.0822137	0.0613433	0.0839745	0.0783424	0.0934083	0.0823791	0.148977	0.115769	0.148977	0.0823791	0.148977	0.0476199	0.0934083	0.200064	0.0783424	0.200064	0.0680322	0.0823791
Fucosidosis	DOID:14500	0.0545214	0.0545214	0.0613433	NA	0.0545214	0.0613433	0.0613433	NA	0.0714299	0.0509475	0.0865818	0.0613433	0.0865818	0.0714299	NA	0.0613433	0.0714299	0.0613433	0.0613433	0.0714299	0.049858	0.0714299	0.0613433	0.0714299	0.0714299	0.109892	0.0545214	0.0444246	0.0714299	0.0714299	0.0536764	0.386968	0.051166	0.0545214	0.0613433	0.109892	0.0865818	0.147106	0.0865818	0.491152	0.0865818	0.0714299	0.0613433	0.109892	0.0545214	0.109892	0.049858	0.491152
Hyperlipoproteinemia Type I	DOID:14118	0.0411723	0.0411723	0.0476199	NA	0.0411723	0.0476199	0.0476199	NA	0.0571439	0.0397384	0.0714299	0.0476199	0.0714299	0.0571439	NA	0.0476199	0.0571439	0.0476199	0.0476199	0.0571439	0.0367619	0.0571439	0.0476199	0.0571439	0.0571439	0.0933603	0.0411723	0.0316203	0.0571439	0.0571439	0.0418146	0.527499	0.0412673	0.0411723	0.0476199	0.0933603	0.0714299	0.12825	0.0714299	0.417263	0.0714299	0.0571439	0.0476199	0.0933603	0.0411723	0.0933603	0.0367619	0.417263
Neuroectodermal Tumors	DOID:171	0.304051	0.0411723	0.0476199	NA	0.304051	0.0476199	0.351665	NA	0.138778	0.0397384	0.0714299	0.0476199	0.0714299	0.0571439	NA	0.0476199	0.0571439	0.0476199	0.0476199	0.421999	0.271481	0.0571439	0.351665	0.0571439	0.0571439	0.0933603	0.0411723	0.0316203	0.0571439	0.0571439	0.0418146	0.0714299	0.0412673	0.0411723	0.0476199	0.0933603	0.0714299	0.12825	0.0714299	0.0933603	0.0714299	0.0571439	0.0476199	0.0933603	0.0411723	0.0933603	0.0367619	0.0933603
Friedreich Ataxia	DOID:12705	0.0262177	0.0636715	0.37258	NA	0.0262177	0.0783424	0.0322586	NA	0.0411723	0.12096	0.132409	0.144176	0.0545214	0.184015	NA	0.0783424	0.184015	0.238225	0.144176	0.0411723	0.0220824	0.09999	0.0322586	0.09999	0.09999	0.0749632	0.0636715	0.0771343	0.0411723	0.09999	0.0690634	0.0545214	0.273855	0.117177	0.0783424	0.0749632	0.132409	0.10736	0.132409	0.0749632	0.132409	0.0411723	0.0783424	0.182054	0.117177	0.33504	0.163075	0.0749632
Cri-du-Chat Syndrome	DOID:12580	0.0749632	0.0749632	0.0823791	NA	0.0749632	0.0823791	0.0823791	NA	0.0933603	0.0679241	0.109892	0.0823791	0.109892	0.0933603	NA	0.0823791	0.0933603	0.0823791	0.0823791	0.0933603	0.0698989	0.0933603	0.0823791	0.0933603	0.0933603	0.328859	0.0749632	0.0640035	0.226732	0.0933603	0.0716984	0.109892	0.066053	0.0749632	0.0823791	0.135413	0.109892	0.176371	0.109892	0.135413	0.109892	0.226732	0.0823791	0.135413	0.0749632	0.135413	0.0698989	0.135413
Blepharoptosis	DOID:0060260	0.0322586	0.0783424	0.171903	NA	0.0322586	0.0934083	0.0384622	NA	0.0476199	0.534733	0.148977	0.673076	0.0613433	0.212832	NA	0.0934083	0.212832	0.171903	0.673076	0.0476199	0.0280133	0.115648	0.0384622	0.115648	0.115648	0.0823791	0.0783424	0.40358	0.0476199	0.115648	0.0822137	0.0613433	0.154541	0.564516	0.0934083	0.0823791	0.148977	0.115769	0.148977	0.0823791	0.148977	0.0476199	0.0934083	0.200064	0.37258	0.368184	0.125202	0.0823791
Goiter	DOID:12176	0.0545214	0.132409	0.148977	NA	0.0545214	0.148977	0.0613433	NA	0.0714299	0.12373	0.21027	0.148977	0.0865818	0.173473	NA	0.148977	0.173473	0.148977	0.148977	0.0714299	0.049858	0.319248	0.0613433	0.173473	0.319248	0.109892	0.132409	0.107888	0.0714299	0.173473	0.130357	0.0865818	0.12426	0.132409	0.148977	0.109892	0.386968	0.147106	0.386968	0.109892	0.21027	0.0714299	0.148977	0.266882	0.132409	0.266882	0.121084	0.109892
Tourette Syndrome	DOID:11119	0.0411723	0.0411723	0.0476199	NA	0.0411723	0.0476199	0.0476199	NA	0.0571439	0.0397384	0.0714299	0.0476199	0.173473	0.0571439	NA	0.0476199	0.0571439	0.0476199	0.0476199	0.0571439	0.0367619	0.0571439	0.0476199	0.0571439	0.0571439	0.0933603	0.0411723	0.0316203	0.0571439	0.0571439	0.0418146	0.0714299	0.0412673	0.0411723	0.0476199	0.0933603	0.0714299	0.12825	0.0714299	0.0933603	0.0714299	0.0571439	0.0476199	0.0933603	0.0411723	0.0933603	0.0367619	0.0933603
Meningomyelocele	DOID:0060326	0.0749632	0.0749632	0.0823791	NA	0.0749632	0.0823791	0.0823791	NA	0.0933603	0.0679241	0.109892	0.0823791	0.109892	0.0933603	NA	0.0823791	0.0933603	0.0823791	0.0823791	0.0933603	0.0698989	0.0933603	0.0823791	0.0933603	0.0933603	0.135413	0.0749632	0.0640035	0.0933603	0.0933603	0.0716984	0.109892	0.066053	0.0749632	0.0823791	0.135413	0.109892	0.176371	0.109892	0.135413	0.109892	0.0933603	0.0823791	0.135413	0.0749632	0.135413	0.0698989	0.135413
Parkinson Disease	DOID:14330	0.0322586	0.0783424	0.44423	NA	0.0322586	0.0934083	0.0384622	NA	0.0476199	0.143909	0.148977	0.171903	0.0613433	0.212832	NA	0.0934083	0.212832	0.284037	0.171903	0.0476199	0.0280133	0.115648	0.0384622	0.115648	0.115648	0.0823791	0.0783424	0.103074	0.0476199	0.115648	0.0822137	0.0613433	0.325918	0.144176	0.0934083	0.0823791	0.148977	0.115769	0.148977	0.0823791	0.148977	0.0476199	0.0934083	0.200064	0.144176	0.368184	0.206874	0.0823791
Choanal Atresia	DOID:9574	0.0322586	0.0783424	0.0934083	NA	0.0322586	0.0934083	0.0384622	NA	0.0476199	0.0781974	0.148977	0.0934083	0.0613433	0.115648	NA	0.171903	0.115648	0.0934083	0.0934083	0.0476199	0.0280133	0.115648	0.0384622	0.212832	0.115648	0.0823791	0.0783424	0.056008	0.0476199	0.115648	0.0822137	0.0613433	0.0839745	0.0783424	0.0934083	0.0823791	0.148977	0.115769	0.148977	0.0823791	0.148977	0.0476199	0.0934083	0.200064	0.0783424	0.200064	0.0680322	0.0823791
Dysostoses	DOID:1934	0.0322586	0.37258	0.0934083	NA	0.0322586	0.0934083	0.0384622	NA	0.0476199	0.0781974	0.148977	0.0934083	0.0613433	0.115648	NA	0.0934083	0.115648	0.0934083	0.0934083	0.0476199	0.0280133	0.115648	0.0384622	0.115648	0.115648	0.0823791	0.0783424	0.056008	0.0476199	0.212832	0.0822137	0.0613433	0.0839745	0.0783424	0.0934083	0.0823791	0.148977	0.115769	0.148977	0.0823791	0.148977	0.0476199	0.0934083	0.200064	0.0783424	0.200064	0.0680322	0.0823791
Epilepsies, Partial	DOID:2234	0.0322586	0.0783424	0.284037	NA	0.0322586	0.0934083	0.0384622	NA	0.0476199	0.143909	0.148977	0.171903	0.0613433	0.212832	NA	0.0934083	0.212832	0.44423	0.171903	0.0476199	0.0280133	0.115648	0.0384622	0.115648	0.115648	0.0823791	0.0783424	0.103074	0.0476199	0.115648	0.0822137	0.0613433	0.225108	0.144176	0.0934083	0.0823791	0.148977	0.115769	0.148977	0.0823791	0.148977	0.0476199	0.0934083	0.200064	0.144176	0.368184	0.490223	0.0823791
Liver Diseases	DOID:409	0.0545214	0.132409	0.148977	NA	0.0545214	0.148977	0.0613433	NA	0.0714299	0.12373	0.386968	0.148977	0.0865818	0.173473	NA	0.148977	0.173473	0.148977	0.148977	0.0714299	0.049858	0.173473	0.0613433	0.173473	0.173473	0.109892	0.132409	0.107888	0.0714299	0.173473	0.130357	0.0865818	0.12426	0.132409	0.148977	0.109892	0.21027	0.147106	0.21027	0.109892	0.21027	0.0714299	0.148977	0.266882	0.132409	0.266882	0.121084	0.109892
Hypoglycemia	DOID:9993	0.0318791	0.0774206	0.0892681	NA	0.0318791	0.0892681	0.0367575	NA	0.0439086	0.0774163	0.132392	0.0892681	0.0545145	0.106635	NA	0.0892681	0.106635	0.0892681	0.0892681	0.0439086	0.0285246	0.196245	0.0367575	0.106635	0.196245	0.070519	0.0774206	0.0597331	0.0439086	0.106635	0.0806277	0.132392	0.0823045	0.0774206	0.0892681	0.070519	0.243646	0.0953135	0.243646	0.17126	0.132392	0.0439086	0.0892681	0.17126	0.0774206	0.17126	0.0692741	0.17126
Klippel-Trenaunay-Weber Syndrome	DOID:2926	0.10736	0.10736	0.115769	NA	0.10736	0.115769	0.115769	NA	0.12825	0.0943727	0.147106	0.115769	0.147106	0.12825	NA	0.115769	0.12825	0.115769	0.115769	0.12825	0.101627	0.12825	0.115769	0.12825	0.12825	0.176371	0.10736	0.094962	0.12825	0.12825	0.0999124	0.147106	0.0889973	0.10736	0.115769	0.176371	0.147106	0.543379	0.147106	0.176371	0.147106	0.12825	0.115769	0.176371	0.10736	0.176371	0.101627	0.176371
Pyloric Stenosis, Hypertrophic	DOID:12638	0.0322586	0.0783424	0.0934083	NA	0.0322586	0.0934083	0.0384622	NA	0.0476199	0.0781974	0.274167	0.0934083	0.0613433	0.115648	NA	0.0934083	0.115648	0.0934083	0.0934083	0.0476199	0.0280133	0.115648	0.0384622	0.115648	0.115648	0.0823791	0.0783424	0.056008	0.0476199	0.115648	0.0822137	0.0613433	0.0839745	0.0783424	0.0934083	0.0823791	0.148977	0.115769	0.148977	0.0823791	0.148977	0.0476199	0.0934083	0.200064	0.0783424	0.200064	0.0680322	0.0823791
Cholestasis, Intrahepatic	DOID:1852	0.0328842	0.0798616	0.0921134	NA	0.0328842	0.0921134	0.037929	NA	0.0453304	0.0795472	0.251718	0.0921134	0.0563205	0.110088	NA	0.0921134	0.110088	0.0921134	0.0921134	0.0453304	0.0294172	0.110088	0.037929	0.110088	0.110088	0.0729353	0.0798616	0.0615857	0.0453304	0.110088	0.0829417	0.0563205	0.0843462	0.0798616	0.0921134	0.0729353	0.136778	0.0987475	0.136778	0.0729353	0.136778	0.0453304	0.0921134	0.177129	0.0798616	0.177129	0.0714418	0.0729353
Frontotemporal Dementia	DOID:9255	0.0322586	0.0783424	0.284037	NA	0.0322586	0.0934083	0.0384622	NA	0.0476199	0.143909	0.148977	0.171903	0.0613433	0.212832	NA	0.0934083	0.212832	0.44423	0.171903	0.0476199	0.0280133	0.115648	0.0384622	0.115648	0.115648	0.0823791	0.0783424	0.103074	0.0476199	0.115648	0.0822137	0.0613433	0.225108	0.144176	0.0934083	0.0823791	0.148977	0.115769	0.148977	0.0823791	0.148977	0.0476199	0.0934083	0.200064	0.144176	0.368184	0.323547	0.0823791
Adrenoleukodystrophy	DOID:10588	0.0262177	0.0636715	0.238225	NA	0.0262177	0.0783424	0.0322586	NA	0.0411723	0.12096	0.132409	0.144176	0.0545214	0.184015	NA	0.0783424	0.184015	0.37258	0.144176	0.0411723	0.0220824	0.09999	0.0322586	0.09999	0.09999	0.0749632	0.0636715	0.0771343	0.0411723	0.09999	0.0690634	0.0545214	0.191655	0.117177	0.0783424	0.0749632	0.132409	0.10736	0.132409	0.0749632	0.132409	0.0411723	0.0783424	0.182054	0.117177	0.33504	0.255047	0.0749632
Hypophosphatemia	DOID:0050336	0.0411723	0.0411723	0.0476199	NA	0.0411723	0.0476199	0.0476199	NA	0.0571439	0.0397384	0.0714299	0.0476199	0.0714299	0.0571439	NA	0.0476199	0.0571439	0.0476199	0.0476199	0.0571439	0.0367619	0.0571439	0.0476199	0.0571439	0.0571439	0.0933603	0.0411723	0.0316203	0.0571439	0.0571439	0.0418146	0.173473	0.0412673	0.0411723	0.0476199	0.0933603	0.0714299	0.12825	0.0714299	0.226732	0.0714299	0.0571439	0.0476199	0.0933603	0.0411723	0.0933603	0.0367619	0.226732
Primary Ovarian Insufficiency	DOID:5426	0.0411723	0.09999	0.115648	NA	0.0411723	0.115648	0.0476199	NA	0.0571439	0.0965077	0.173473	0.115648	0.0714299	0.138778	NA	0.115648	0.138778	0.115648	0.115648	0.0571439	0.0367619	0.138778	0.0476199	0.138778	0.138778	0.0933603	0.09999	0.0767921	0.0571439	0.138778	0.10155	0.0714299	0.10022	0.09999	0.115648	0.0933603	0.173473	0.12825	0.173473	0.0933603	0.173473	0.0571439	0.115648	0.226732	0.09999	0.226732	0.089279	0.0933603
Prolactinoma	DOID:5394	0.0636715	0.0262177	0.0322586	NA	0.0636715	0.0322586	0.0783424	NA	0.720502	0.0270641	0.0545214	0.0322586	0.0545214	0.0411723	NA	0.0322586	0.0411723	0.0322586	0.0322586	0.09999	0.0536287	0.0411723	0.0783424	0.0411723	0.0411723	0.0749632	0.0262177	0.0172584	0.0411723	0.0411723	0.0284379	0.0545214	0.0300073	0.0262177	0.0322586	0.0749632	0.0545214	0.10736	0.0545214	0.0749632	0.0545214	0.0411723	0.0322586	0.0749632	0.0262177	0.0749632	0.0220824	0.0749632
Exostoses, Multiple Hereditary	DOID:206	0.0220824	0.255047	0.0680322	NA	0.0220824	0.0680322	0.0280133	NA	0.0367619	0.0571619	0.121084	0.0680322	0.049858	0.089279	NA	0.0680322	0.089279	0.0680322	0.0680322	0.0367619	0.0180216	0.089279	0.0280133	0.089279	0.089279	0.0698989	0.0536287	0.0322604	0.0367619	0.164303	0.0600399	0.049858	0.0652346	0.0536287	0.0680322	0.0698989	0.121084	0.101627	0.121084	0.0698989	0.121084	0.0367619	0.0680322	0.169754	0.0536287	0.169754	0.0437668	0.0698989
Chondrosarcoma, Mesenchymal	DOID:4545	0.458801	0.0262177	0.0322586	NA	0.458801	0.0322586	0.238225	NA	0.09999	0.0270641	0.0545214	0.0322586	0.0545214	0.0411723	NA	0.0322586	0.0411723	0.0322586	0.0322586	0.304051	0.163075	0.0411723	0.238225	0.0411723	0.0411723	0.0749632	0.0262177	0.0172584	0.0411723	0.0411723	0.0284379	0.0545214	0.0300073	0.0262177	0.0322586	0.0749632	0.0545214	0.10736	0.0545214	0.0749632	0.0545214	0.0411723	0.0322586	0.0749632	0.0262177	0.0749632	0.0220824	0.0749632
Sarcoma	DOID:6193	0.184015	0.0411723	0.0476199	NA	0.184015	0.0476199	0.212832	NA	0.138778	0.0397384	0.0714299	0.0476199	0.0714299	0.0571439	NA	0.0476199	0.0571439	0.0476199	0.0476199	0.255398	0.164303	0.0571439	0.212832	0.0571439	0.0571439	0.0933603	0.0411723	0.0316203	0.0571439	0.0571439	0.0418146	0.0714299	0.0412673	0.0411723	0.0476199	0.0933603	0.0714299	0.12825	0.0714299	0.0933603	0.0714299	0.0571439	0.0476199	0.0933603	0.0411723	0.0933603	0.0367619	0.0933603
Glomerulosclerosis, Focal Segmental	DOID:1312	0.0262177	0.0636715	0.0783424	NA	0.0262177	0.0783424	0.0322586	NA	0.0411723	0.065727	0.132409	0.0783424	0.0545214	0.09999	NA	0.0783424	0.09999	0.0783424	0.0783424	0.0411723	0.0220824	0.09999	0.0322586	0.09999	0.09999	0.0749632	0.0636715	0.0419131	0.0411723	0.09999	0.0690634	0.0545214	0.0728749	0.0636715	0.0783424	0.0749632	0.132409	0.10736	0.132409	0.0749632	0.132409	0.0411723	0.0783424	0.182054	0.0636715	0.182054	0.0536287	0.0749632
Pre-Eclampsia	DOID:10591	0.0322586	0.0783424	0.0934083	NA	0.0322586	0.171903	0.0384622	NA	0.0476199	0.0781974	0.148977	0.0934083	0.0613433	0.115648	NA	0.0934083	0.115648	0.0934083	0.0934083	0.0476199	0.0280133	0.115648	0.0384622	0.115648	0.115648	0.0823791	0.37258	0.056008	0.0476199	0.115648	0.0822137	0.0613433	0.0839745	0.0783424	0.171903	0.0823791	0.148977	0.115769	0.148977	0.0823791	0.148977	0.0476199	0.284037	0.200064	0.0783424	0.200064	0.0680322	0.0823791
Coronary Vasospasm	DOID:11840	0.0322586	0.0783424	0.0934083	NA	0.0322586	0.171903	0.0384622	NA	0.0476199	0.0781974	0.148977	0.0934083	0.0613433	0.115648	NA	0.0934083	0.115648	0.0934083	0.0934083	0.0476199	0.0280133	0.115648	0.0384622	0.115648	0.115648	0.0823791	0.564516	0.056008	0.0476199	0.115648	0.0822137	0.0613433	0.0839745	0.0783424	0.171903	0.0823791	0.148977	0.115769	0.148977	0.0823791	0.148977	0.0476199	0.284037	0.200064	0.0783424	0.200064	0.0680322	0.0823791
Acne Vulgaris	DOID:6543	0.0411723	0.09999	0.115648	NA	0.0411723	0.115648	0.0476199	NA	0.0571439	0.0965077	0.173473	0.115648	0.0714299	0.138778	NA	0.115648	0.138778	0.115648	0.115648	0.0571439	0.0367619	0.138778	0.0476199	0.138778	0.138778	0.0933603	0.09999	0.0767921	0.0571439	0.138778	0.10155	0.0714299	0.10022	0.09999	0.115648	0.0933603	0.173473	0.12825	0.173473	0.0933603	0.527499	0.0571439	0.115648	0.689451	0.09999	0.226732	0.089279	0.0933603
Leukemia	DOID:1240	0.238225	0.0322586	0.0384622	NA	0.238225	0.0384622	0.284037	NA	0.115648	0.0321989	0.0613433	0.0384622	0.0613433	0.0476199	NA	0.0384622	0.0476199	0.0384622	0.0384622	0.351665	0.728332	0.0476199	0.284037	0.0476199	0.0476199	0.0823791	0.0322586	0.0230621	0.0476199	0.0476199	0.0338527	0.0613433	0.0345777	0.0322586	0.0384622	0.0823791	0.0613433	0.115769	0.0613433	0.0823791	0.0613433	0.0476199	0.0384622	0.0823791	0.0322586	0.0823791	0.0280133	0.0823791
Anemia, Neonatal	DOID:11244	0.0411723	0.09999	0.115648	NA	0.0411723	0.115648	0.0476199	NA	0.0571439	0.0965077	0.173473	0.115648	0.0714299	0.138778	NA	0.115648	0.138778	0.115648	0.115648	0.0571439	0.0367619	0.138778	0.0476199	0.138778	0.138778	0.0933603	0.09999	0.0767921	0.0571439	0.138778	0.308794	0.0714299	0.10022	0.09999	0.115648	0.0933603	0.173473	0.12825	0.173473	0.0933603	0.173473	0.0571439	0.115648	0.226732	0.09999	0.226732	0.089279	0.0933603
Cholangiocarcinoma	DOID:4947	0.142026	0.0192322	0.0250878	NA	0.142026	0.0250878	0.439028	NA	0.0819002	0.0211008	0.0466468	0.0250878	0.0466468	0.0337236	NA	0.0250878	0.0337236	0.0250878	0.0250878	0.3895	0.112415	0.0337236	0.185269	0.0337236	0.0337236	0.0664141	0.0192322	0.0105433	0.0337236	0.0337236	0.0221572	0.0466468	0.0246847	0.0192322	0.0250878	0.0664141	0.0466468	0.0976859	0.0466468	0.0664141	0.0466468	0.0337236	0.0250878	0.0664141	0.0192322	0.0664141	0.0152224	0.0664141
Cutis Laxa	DOID:3144	0.0545214	0.132409	0.148977	NA	0.0545214	0.148977	0.0613433	NA	0.0714299	0.12373	0.21027	0.148977	0.0865818	0.173473	NA	0.148977	0.173473	0.148977	0.148977	0.0714299	0.049858	0.173473	0.0613433	0.173473	0.173473	0.109892	0.132409	0.107888	0.0714299	0.173473	0.130357	0.0865818	0.12426	0.132409	0.148977	0.109892	0.21027	0.147106	0.21027	0.109892	0.639393	0.0714299	0.148977	0.811538	0.132409	0.266882	0.121084	0.109892
Pleural Diseases	DOID:1532	0.0545214	0.132409	0.148977	NA	0.0545214	0.148977	0.0613433	NA	0.0714299	0.12373	0.21027	0.148977	0.0865818	0.173473	NA	0.45301	0.173473	0.148977	0.148977	0.0714299	0.049858	0.173473	0.0613433	0.527499	0.173473	0.109892	0.132409	0.107888	0.0714299	0.173473	0.130357	0.0865818	0.12426	0.132409	0.148977	0.109892	0.21027	0.147106	0.21027	0.109892	0.21027	0.0714299	0.148977	0.266882	0.132409	0.266882	0.121084	0.109892
Skin Neoplasms	DOID:3165	0.09999	0.0411723	0.0476199	NA	0.09999	0.0476199	0.115648	NA	0.421999	0.0397384	0.0714299	0.0476199	0.0714299	0.0571439	NA	0.0476199	0.0571439	0.0476199	0.0476199	0.138778	0.089279	0.0571439	0.115648	0.0571439	0.0571439	0.0933603	0.0411723	0.0316203	0.0571439	0.0571439	0.0418146	0.0714299	0.0412673	0.0411723	0.0476199	0.0933603	0.0714299	0.12825	0.0714299	0.0933603	0.0714299	0.0571439	0.0476199	0.0933603	0.0411723	0.0933603	0.0367619	0.0933603
Intestinal Diseases	DOID:5295	0.0749632	0.182054	0.200064	NA	0.0749632	0.200064	0.0823791	NA	0.0933603	0.164959	0.811538	0.200064	0.109892	0.226732	NA	0.200064	0.226732	0.200064	0.200064	0.0933603	0.0698989	0.226732	0.0823791	0.226732	0.226732	0.135413	0.182054	0.155437	0.0933603	0.226732	0.174125	0.109892	0.160414	0.182054	0.200064	0.135413	0.266882	0.176371	0.266882	0.135413	0.266882	0.0933603	0.200064	0.328859	0.182054	0.328859	0.169754	0.135413
Hyperlipoproteinemia Type II	DOID:13810	0.0411723	0.0411723	0.0476199	NA	0.0411723	0.0476199	0.0476199	NA	0.0571439	0.0397384	0.0714299	0.0476199	0.0714299	0.0571439	NA	0.0476199	0.0571439	0.0476199	0.0476199	0.0571439	0.0367619	0.0571439	0.0476199	0.0571439	0.0571439	0.0933603	0.0411723	0.0316203	0.0571439	0.0571439	0.0418146	0.527499	0.0412673	0.0411723	0.0476199	0.0933603	0.0714299	0.12825	0.0714299	0.417263	0.0714299	0.0571439	0.0476199	0.0933603	0.0411723	0.0933603	0.0367619	0.417263
Hyperlipoproteinemia Type IV	DOID:1172	0.0411723	0.0411723	0.0476199	NA	0.0411723	0.0476199	0.0476199	NA	0.0571439	0.0397384	0.0714299	0.0476199	0.0714299	0.0571439	NA	0.0476199	0.0571439	0.0476199	0.0476199	0.0571439	0.0367619	0.0571439	0.0476199	0.0571439	0.0571439	0.0933603	0.0411723	0.0316203	0.0571439	0.0571439	0.0418146	0.527499	0.0412673	0.0411723	0.0476199	0.0933603	0.0714299	0.12825	0.0714299	0.417263	0.0714299	0.0571439	0.0476199	0.0933603	0.0411723	0.0933603	0.0367619	0.417263
Brain Diseases	DOID:936	0.0545214	0.132409	0.45301	NA	0.0545214	0.148977	0.0613433	NA	0.0714299	0.227704	0.21027	0.274167	0.0865818	0.319248	NA	0.148977	0.319248	0.708501	0.274167	0.0714299	0.049858	0.173473	0.0613433	0.173473	0.173473	0.109892	0.132409	0.198551	0.0714299	0.173473	0.130357	0.0865818	0.346526	0.243677	0.148977	0.109892	0.21027	0.147106	0.21027	0.109892	0.21027	0.0714299	0.148977	0.266882	0.243677	0.491152	0.575848	0.109892
Periventricular Nodular Heterotopia	DOID:0050454	0.0749632	0.0749632	0.0823791	NA	0.0749632	0.0823791	0.0823791	NA	0.0933603	0.0679241	0.109892	0.0823791	0.109892	0.0933603	NA	0.0823791	0.0933603	0.0823791	0.0823791	0.0933603	0.0698989	0.0933603	0.0823791	0.0933603	0.0933603	0.135413	0.0749632	0.0640035	0.0933603	0.0933603	0.0716984	0.109892	0.066053	0.0749632	0.0823791	0.135413	0.109892	0.176371	0.109892	0.135413	0.109892	0.0933603	0.0823791	0.135413	0.0749632	0.135413	0.0698989	0.135413
Bronchopulmonary Dysplasia	DOID:11650	NA	NA	NA	NA	NA	NA	NA	NA	NA	NA	NA	NA	NA	NA	NA	NA	NA	NA	NA	NA	NA	NA	NA	NA	NA	NA	NA	NA	NA	NA	NA	NA	NA	NA	NA	NA	NA	NA	NA	NA	NA	NA	NA	NA	NA	NA	NA	NA
Hypospadias	DOID:10892	0.10736	0.10736	0.115769	NA	0.10736	0.115769	0.115769	NA	0.12825	0.0943727	0.147106	0.115769	0.147106	0.12825	NA	0.115769	0.12825	0.115769	0.115769	0.12825	0.101627	0.12825	0.115769	0.12825	0.12825	0.176371	0.10736	0.094962	0.12825	0.12825	0.0999124	0.147106	0.0889973	0.10736	0.115769	0.176371	0.147106	0.223744	0.147106	0.176371	0.147106	0.12825	0.115769	0.176371	0.10736	0.176371	0.101627	0.176371
Mitochondrial Myopathies	DOID:699	0.0322586	0.144176	0.0934083	NA	0.0322586	0.0934083	0.0384622	NA	0.0476199	0.0781974	0.148977	0.0934083	0.0613433	0.115648	NA	0.0934083	0.115648	0.0934083	0.0934083	0.0476199	0.0280133	0.115648	0.0384622	0.115648	0.115648	0.0823791	0.0783424	0.056008	0.0476199	0.833333	0.0822137	0.0613433	0.0839745	0.0783424	0.0934083	0.0823791	0.148977	0.115769	0.148977	0.0823791	0.148977	0.0476199	0.0934083	0.200064	0.0783424	0.200064	0.0680322	0.0823791
Aniridia	DOID:12271	0.0220824	0.0536287	0.125202	NA	0.0220824	0.0680322	0.0280133	NA	0.0367619	0.383697	0.121084	0.490223	0.049858	0.164303	NA	0.0680322	0.164303	0.125202	0.490223	0.0367619	0.0180216	0.089279	0.0280133	0.089279	0.089279	0.0698989	0.0536287	0.23246	0.0367619	0.089279	0.0600399	0.049858	0.120054	0.386435	0.0680322	0.0698989	0.121084	0.101627	0.121084	0.0698989	0.121084	0.0367619	0.0680322	0.169754	0.255047	0.312405	0.0805457	0.0698989
Breast Diseases	DOID:3463	0.0749632	0.182054	0.200064	NA	0.0749632	0.200064	0.0823791	NA	0.0933603	0.164959	0.266882	0.200064	0.109892	0.226732	NA	0.200064	0.226732	0.200064	0.200064	0.0933603	0.0698989	0.226732	0.0823791	0.226732	0.226732	0.135413	0.182054	0.155437	0.0933603	0.226732	0.174125	0.109892	0.160414	0.182054	0.200064	0.135413	0.266882	0.176371	0.266882	0.135413	0.266882	0.0933603	0.200064	0.328859	0.182054	0.328859	0.169754	0.135413
Hypothalamic Diseases	DOID:6676	0.0322586	0.0783424	0.284037	NA	0.0322586	0.0934083	0.0384622	NA	0.0476199	0.143909	0.148977	0.171903	0.0613433	0.212832	NA	0.0934083	0.212832	0.44423	0.171903	0.0476199	0.0280133	0.115648	0.0384622	0.115648	0.115648	0.0823791	0.0783424	0.103074	0.0476199	0.115648	0.0822137	0.0613433	0.225108	0.144176	0.0934083	0.0823791	0.148977	0.115769	0.148977	0.0823791	0.148977	0.0476199	0.0934083	0.200064	0.144176	0.368184	0.323547	0.0823791
Ischemic Attack, Transient	DOID:224	0.0322586	0.0783424	0.0934083	NA	0.0322586	0.171903	0.0384622	NA	0.0476199	0.0781974	0.148977	0.0934083	0.0613433	0.115648	NA	0.0934083	0.115648	0.0934083	0.0934083	0.0476199	0.0280133	0.115648	0.0384622	0.115648	0.115648	0.0823791	0.238225	0.056008	0.0476199	0.115648	0.0822137	0.0613433	0.0839745	0.0783424	0.171903	0.0823791	0.148977	0.115769	0.148977	0.0823791	0.148977	0.0476199	0.284037	0.200064	0.0783424	0.200064	0.0680322	0.0823791
Genital Diseases, Male	DOID:48	0.0749632	0.182054	0.200064	NA	0.0749632	0.200064	0.0823791	NA	0.0933603	0.164959	0.266882	0.200064	0.109892	0.226732	NA	0.200064	0.226732	0.200064	0.200064	0.0933603	0.0698989	0.226732	0.0823791	0.226732	0.226732	0.135413	0.182054	0.155437	0.0933603	0.226732	0.174125	0.109892	0.160414	0.182054	0.200064	0.135413	0.266882	0.176371	0.266882	0.135413	0.266882	0.0933603	0.200064	0.328859	0.182054	0.328859	0.169754	0.135413
Keratitis	DOID:4677	0.0262177	0.0636715	0.144176	NA	0.0262177	0.0783424	0.0322586	NA	0.0411723	0.445196	0.132409	0.564516	0.0545214	0.184015	NA	0.0783424	0.184015	0.144176	0.564516	0.0411723	0.0220824	0.09999	0.0322586	0.09999	0.09999	0.0749632	0.0636715	0.302016	0.0411723	0.09999	0.0690634	0.0545214	0.134114	0.458801	0.0783424	0.0749632	0.132409	0.10736	0.132409	0.0749632	0.132409	0.0411723	0.0783424	0.182054	0.302808	0.33504	0.0986948	0.0749632
Cryptorchidism	DOID:11383	0.10736	0.10736	0.115769	NA	0.10736	0.115769	0.115769	NA	0.12825	0.0943727	0.147106	0.115769	0.147106	0.12825	NA	0.115769	0.12825	0.115769	0.115769	0.12825	0.101627	0.12825	0.115769	0.12825	0.12825	0.176371	0.10736	0.094962	0.12825	0.12825	0.0999124	0.147106	0.0889973	0.10736	0.115769	0.176371	0.147106	0.223744	0.147106	0.176371	0.147106	0.12825	0.115769	0.176371	0.10736	0.176371	0.101627	0.176371
Atherosclerosis	DOID:1936	0.0262177	0.0636715	0.0783424	NA	0.0262177	0.144176	0.0322586	NA	0.0411723	0.065727	0.132409	0.0783424	0.0545214	0.09999	NA	0.0783424	0.09999	0.0783424	0.0783424	0.0411723	0.0220824	0.09999	0.0322586	0.09999	0.09999	0.0749632	0.302808	0.0419131	0.0411723	0.09999	0.0690634	0.0545214	0.0728749	0.0636715	0.144176	0.0749632	0.132409	0.10736	0.132409	0.0749632	0.132409	0.0411723	0.238225	0.182054	0.0636715	0.182054	0.0536287	0.0749632
Renal Insufficiency	DOID:1074	0.0545214	0.132409	0.148977	NA	0.0545214	0.148977	0.0613433	NA	0.0714299	0.12373	0.21027	0.148977	0.0865818	0.173473	NA	0.148977	0.173473	0.148977	0.148977	0.0714299	0.049858	0.173473	0.0613433	0.173473	0.173473	0.109892	0.132409	0.107888	0.0714299	0.173473	0.130357	0.0865818	0.12426	0.132409	0.148977	0.109892	0.21027	0.147106	0.21027	0.109892	0.21027	0.0714299	0.148977	0.266882	0.132409	0.266882	0.121084	0.109892
Hyperglycinemia, Nonketotic	DOID:9268	0.0545214	0.0545214	0.0613433	NA	0.0545214	0.0613433	0.0613433	NA	0.0714299	0.0509475	0.0865818	0.0613433	0.0865818	0.0714299	NA	0.0613433	0.0714299	0.0613433	0.0613433	0.0714299	0.049858	0.0714299	0.0613433	0.0714299	0.0714299	0.109892	0.0545214	0.0444246	0.0714299	0.0714299	0.0536764	0.386968	0.051166	0.0545214	0.0613433	0.109892	0.0865818	0.147106	0.0865818	0.491152	0.0865818	0.0714299	0.0613433	0.109892	0.0545214	0.109892	0.049858	0.491152
Prostatitis	DOID:14654	0.0411723	0.09999	0.115648	NA	0.0411723	0.115648	0.0476199	NA	0.0571439	0.0965077	0.173473	0.115648	0.0714299	0.138778	NA	0.115648	0.138778	0.115648	0.115648	0.0571439	0.0367619	0.138778	0.0476199	0.138778	0.138778	0.0933603	0.09999	0.0767921	0.0571439	0.138778	0.10155	0.0714299	0.10022	0.09999	0.115648	0.0933603	0.173473	0.12825	0.173473	0.0933603	0.173473	0.0571439	0.115648	0.226732	0.09999	0.226732	0.089279	0.0933603
Hypokalemia	DOID:4500	0.0545214	0.0545214	0.0613433	NA	0.0545214	0.0613433	0.0613433	NA	0.0714299	0.0509475	0.0865818	0.0613433	0.0865818	0.0714299	NA	0.0613433	0.0714299	0.0613433	0.0613433	0.0714299	0.049858	0.0714299	0.0613433	0.0714299	0.0714299	0.109892	0.0545214	0.0444246	0.0714299	0.0714299	0.0536764	0.21027	0.051166	0.0545214	0.0613433	0.109892	0.0865818	0.147106	0.0865818	0.266882	0.0865818	0.0714299	0.0613433	0.109892	0.0545214	0.109892	0.049858	0.266882
Retinal Diseases	DOID:5679	0.0322586	0.0783424	0.171903	NA	0.0322586	0.0934083	0.0384622	NA	0.0476199	0.767367	0.148977	0.673076	0.0613433	0.212832	NA	0.0934083	0.212832	0.171903	0.673076	0.0476199	0.0280133	0.115648	0.0384622	0.115648	0.115648	0.0823791	0.0783424	0.599604	0.0476199	0.115648	0.0822137	0.0613433	0.154541	0.564516	0.0934083	0.0823791	0.148977	0.115769	0.148977	0.0823791	0.148977	0.0476199	0.0934083	0.200064	0.37258	0.368184	0.125202	0.0823791
Acidosis, Lactic	DOID:3650	0.0749632	0.0749632	0.0823791	NA	0.0749632	0.0823791	0.0823791	NA	0.0933603	0.0679241	0.109892	0.0823791	0.109892	0.0933603	NA	0.0823791	0.0933603	0.0823791	0.0823791	0.0933603	0.0698989	0.0933603	0.0823791	0.0933603	0.0933603	0.135413	0.0749632	0.0640035	0.0933603	0.0933603	0.0716984	0.266882	0.066053	0.0749632	0.0823791	0.135413	0.109892	0.176371	0.109892	0.328859	0.109892	0.0933603	0.0823791	0.135413	0.0749632	0.135413	0.0698989	0.328859
Sarcoidosis	DOID:11335	0.0411723	0.09999	0.115648	NA	0.0411723	0.115648	0.0476199	NA	0.0571439	0.0965077	0.173473	0.115648	0.0714299	0.138778	NA	0.115648	0.138778	0.115648	0.115648	0.0571439	0.0367619	0.138778	0.0476199	0.138778	0.138778	0.0933603	0.09999	0.0767921	0.0571439	0.138778	0.186886	0.0714299	0.10022	0.09999	0.115648	0.0933603	0.173473	0.12825	0.173473	0.0933603	0.173473	0.0571439	0.115648	0.226732	0.09999	0.226732	0.089279	0.0933603
ACTH-Secreting Pituitary Adenoma	DOID:7004	0.0636715	0.0262177	0.0322586	NA	0.0636715	0.0322586	0.0783424	NA	0.720502	0.0270641	0.0545214	0.0322586	0.0545214	0.0411723	NA	0.0322586	0.0411723	0.0322586	0.0322586	0.09999	0.0536287	0.0411723	0.0783424	0.0411723	0.0411723	0.0749632	0.0262177	0.0172584	0.0411723	0.0411723	0.0284379	0.0545214	0.0300073	0.0262177	0.0322586	0.0749632	0.0545214	0.10736	0.0545214	0.0749632	0.0545214	0.0411723	0.0322586	0.0749632	0.0262177	0.0749632	0.0220824	0.0749632
Parathyroid Neoplasms	DOID:7608	0.09999	0.0411723	0.0476199	NA	0.09999	0.0476199	0.115648	NA	0.659999	0.0397384	0.0714299	0.0476199	0.0714299	0.0571439	NA	0.0476199	0.0571439	0.0476199	0.0476199	0.138778	0.089279	0.0571439	0.115648	0.0571439	0.0571439	0.0933603	0.0411723	0.0316203	0.0571439	0.0571439	0.0418146	0.0714299	0.0412673	0.0411723	0.0476199	0.0933603	0.0714299	0.12825	0.0714299	0.0933603	0.0714299	0.0571439	0.0476199	0.0933603	0.0411723	0.0933603	0.0367619	0.0933603
Head and Neck Neoplasms	DOID:11934	0.402632	0.0545214	0.0613433	NA	0.402632	0.0613433	0.45301	NA	0.173473	0.0509475	0.0865818	0.0613433	0.0865818	0.0714299	NA	0.0613433	0.0714299	0.0613433	0.0613433	0.527499	0.368193	0.0714299	0.45301	0.0714299	0.0714299	0.109892	0.0545214	0.0444246	0.0714299	0.0714299	0.0536764	0.0865818	0.051166	0.0545214	0.0613433	0.109892	0.0865818	0.147106	0.0865818	0.109892	0.0865818	0.0714299	0.0613433	0.109892	0.0545214	0.109892	0.049858	0.109892
Isaacs Syndrome	DOID:963	0.0411723	0.09999	0.212832	NA	0.0411723	0.115648	0.0476199	NA	0.0571439	0.177607	0.173473	0.212832	0.0714299	0.659999	NA	0.115648	0.421999	0.212832	0.212832	0.0571439	0.0367619	0.138778	0.0476199	0.138778	0.138778	0.0933603	0.09999	0.141323	0.0571439	0.138778	0.10155	0.0714299	0.304752	0.184015	0.115648	0.0933603	0.173473	0.12825	0.173473	0.0933603	0.173473	0.0571439	0.115648	0.226732	0.184015	0.417263	0.164303	0.0933603
Hypoprothrombinemias	DOID:2235	0.0411723	0.0411723	0.0476199	NA	0.0411723	0.0476199	0.0476199	NA	0.0571439	0.0397384	0.0714299	0.0476199	0.0714299	0.0571439	NA	0.0476199	0.0571439	0.0476199	0.0476199	0.0571439	0.0367619	0.0571439	0.0476199	0.0571439	0.0571439	0.417263	0.0411723	0.0316203	0.421999	0.0571439	0.0418146	0.0714299	0.0412673	0.0411723	0.0476199	0.0933603	0.0714299	0.12825	0.0714299	0.0933603	0.0714299	0.659999	0.0476199	0.0933603	0.0411723	0.0933603	0.0367619	0.0933603
Depression, Postpartum	DOID:9478	0.0322586	0.0322586	0.0384622	NA	0.0322586	0.0384622	0.0384622	NA	0.0476199	0.0321989	0.0613433	0.0384622	0.45301	0.0476199	NA	0.0384622	0.0476199	0.0384622	0.0384622	0.0476199	0.0280133	0.0476199	0.0384622	0.0476199	0.0476199	0.0823791	0.0322586	0.0230621	0.0476199	0.0476199	0.0338527	0.0613433	0.0345777	0.0322586	0.0384622	0.0823791	0.0613433	0.115769	0.0613433	0.0823791	0.0613433	0.0476199	0.0384622	0.0823791	0.0322586	0.0823791	0.0280133	0.0823791
Sebaceous Gland Neoplasms	DOID:5759	0.0783424	0.0322586	0.0384622	NA	0.0783424	0.0384622	0.0934083	NA	0.351665	0.0321989	0.0613433	0.0384622	0.0613433	0.0476199	NA	0.0384622	0.0476199	0.0384622	0.0384622	0.115648	0.0680322	0.0476199	0.0934083	0.0476199	0.0476199	0.0823791	0.0322586	0.0230621	0.0476199	0.0476199	0.0338527	0.0613433	0.0345777	0.0322586	0.0384622	0.0823791	0.0613433	0.115769	0.0613433	0.0823791	0.0613433	0.0476199	0.0384622	0.0823791	0.0322586	0.0823791	0.0280133	0.0823791
Androgen-Insensitivity Syndrome	DOID:4674	0.0318791	0.0774206	0.0892681	NA	0.0318791	0.0892681	0.0367575	NA	0.0439086	0.0774163	0.132392	0.0892681	0.0545145	0.106635	NA	0.0892681	0.106635	0.0892681	0.0892681	0.0439086	0.0285246	0.182803	0.0367575	0.106635	0.669124	0.070519	0.0774206	0.0597331	0.0439086	0.106635	0.0806277	0.0545145	0.0823045	0.0774206	0.0892681	0.070519	0.229903	0.0953135	0.229903	0.070519	0.132392	0.0439086	0.0892681	0.17126	0.0774206	0.17126	0.0692741	0.070519
Testicular Neoplasms	DOID:2998	0.238225	0.0322586	0.0384622	NA	0.238225	0.0384622	0.284037	NA	0.115648	0.0321989	0.0613433	0.0384622	0.0613433	0.0476199	NA	0.0384622	0.0476199	0.0384622	0.0384622	0.351665	0.206874	0.0476199	0.284037	0.0476199	0.0476199	0.0823791	0.0322586	0.0230621	0.0476199	0.0476199	0.0338527	0.0613433	0.0345777	0.0322586	0.0384622	0.0823791	0.0613433	0.115769	0.0613433	0.0823791	0.0613433	0.0476199	0.0384622	0.0823791	0.0322586	0.0823791	0.0280133	0.0823791
Anemia, Hemolytic, Autoimmune	DOID:718	0.0322586	0.0783424	0.0934083	NA	0.0322586	0.0934083	0.0384622	NA	0.0476199	0.0781974	0.148977	0.0934083	0.0613433	0.115648	NA	0.0934083	0.115648	0.0934083	0.0934083	0.0476199	0.0280133	0.115648	0.0384622	0.115648	0.115648	0.0823791	0.0783424	0.056008	0.0476199	0.115648	0.151301	0.0613433	0.0839745	0.0783424	0.0934083	0.0823791	0.148977	0.115769	0.148977	0.0823791	0.148977	0.0476199	0.0934083	0.200064	0.0783424	0.200064	0.0680322	0.0823791
Pyoderma Gangrenosum	DOID:8553	0.0322586	0.0783424	0.0934083	NA	0.0322586	0.0934083	0.0384622	NA	0.0476199	0.0781974	0.148977	0.0934083	0.0613433	0.115648	NA	0.0934083	0.115648	0.0934083	0.0934083	0.0476199	0.0280133	0.115648	0.0384622	0.115648	0.115648	0.0823791	0.0783424	0.056008	0.0476199	0.115648	0.0822137	0.0613433	0.0839745	0.0783424	0.0934083	0.0823791	0.148977	0.115769	0.148977	0.0823791	0.708501	0.0476199	0.0934083	0.608356	0.0783424	0.200064	0.0680322	0.0823791
Pulmonary Valve Stenosis	DOID:6420	0.0322586	0.0783424	0.0934083	NA	0.0322586	0.44423	0.0384622	NA	0.0476199	0.0781974	0.148977	0.0934083	0.0613433	0.115648	NA	0.0934083	0.115648	0.0934083	0.0934083	0.0476199	0.0280133	0.115648	0.0384622	0.115648	0.115648	0.0823791	0.144176	0.056008	0.0476199	0.115648	0.0822137	0.0613433	0.0839745	0.0783424	0.44423	0.0823791	0.148977	0.115769	0.148977	0.0823791	0.148977	0.0476199	0.171903	0.200064	0.0783424	0.200064	0.0680322	0.0823791
Li-Fraumeni Syndrome	DOID:3012	0.0411723	0.0411723	0.0476199	NA	0.0411723	0.0476199	0.0476199	NA	0.0571439	0.0397384	0.0714299	0.0476199	0.0714299	0.0571439	NA	0.0476199	0.0571439	0.0476199	0.0476199	0.0571439	0.0367619	0.0571439	0.0476199	0.0571439	0.0571439	0.417263	0.0411723	0.0316203	0.659999	0.0571439	0.0418146	0.0714299	0.0412673	0.0411723	0.0476199	0.0933603	0.0714299	0.12825	0.0714299	0.0933603	0.0714299	0.421999	0.0476199	0.0933603	0.0411723	0.0933603	0.0367619	0.0933603
Familial Mediterranean Fever	DOID:2987	0.0411723	0.09999	0.115648	NA	0.0411723	0.115648	0.0476199	NA	0.0571439	0.0965077	0.173473	0.115648	0.0714299	0.138778	NA	0.115648	0.138778	0.115648	0.115648	0.0571439	0.0367619	0.138778	0.0476199	0.138778	0.138778	0.0933603	0.09999	0.0767921	0.0571439	0.138778	0.186886	0.0714299	0.10022	0.09999	0.115648	0.0933603	0.173473	0.12825	0.173473	0.0933603	0.173473	0.0571439	0.115648	0.226732	0.09999	0.226732	0.089279	0.0933603
Anemia, Pernicious	DOID:13381	0.0411723	0.0411723	0.0476199	NA	0.0411723	0.0476199	0.0476199	NA	0.0571439	0.0397384	0.0714299	0.0476199	0.0714299	0.0571439	NA	0.0476199	0.0571439	0.0476199	0.0476199	0.0571439	0.0367619	0.0571439	0.0476199	0.0571439	0.0571439	0.0933603	0.0411723	0.0316203	0.0571439	0.0571439	0.0418146	0.173473	0.0412673	0.0411723	0.0476199	0.0933603	0.0714299	0.12825	0.0714299	0.226732	0.0714299	0.0571439	0.0476199	0.0933603	0.0411723	0.0933603	0.0367619	0.226732
Seizures	DOID:11832	0.0245669	0.0596625	0.21562	NA	0.0245669	0.0709085	0.0291976	NA	0.0359795	0.337969	0.111773	0.413933	0.046024	0.160806	NA	0.0709085	0.160806	0.337226	0.413933	0.0359795	0.0213808	0.0873788	0.0291976	0.0873788	0.0873788	0.0611509	0.0596625	0.214252	0.0359795	0.0873788	0.0642657	0.046024	0.182286	0.333879	0.0709085	0.0611509	0.111773	0.0845132	0.111773	0.0611509	0.111773	0.0359795	0.0709085	0.148509	0.231559	0.273307	0.374157	0.0611509
Sjogren's Syndrome	DOID:12894	0.0411723	0.09999	0.115648	NA	0.0411723	0.115648	0.0476199	NA	0.0571439	0.0965077	0.173473	0.115648	0.0714299	0.138778	NA	0.115648	0.138778	0.115648	0.115648	0.0571439	0.0367619	0.138778	0.0476199	0.138778	0.138778	0.0933603	0.09999	0.0767921	0.0571439	0.138778	0.186886	0.0714299	0.10022	0.09999	0.115648	0.0933603	0.173473	0.12825	0.173473	0.0933603	0.173473	0.0571439	0.115648	0.226732	0.09999	0.226732	0.089279	0.0933603
Colitis	DOID:0060180	0.0411723	0.09999	0.115648	NA	0.0411723	0.115648	0.0476199	NA	0.0571439	0.0965077	0.527499	0.115648	0.0714299	0.138778	NA	0.115648	0.138778	0.115648	0.115648	0.0571439	0.0367619	0.138778	0.0476199	0.138778	0.138778	0.0933603	0.09999	0.0767921	0.0571439	0.138778	0.10155	0.0714299	0.10022	0.09999	0.115648	0.0933603	0.173473	0.12825	0.173473	0.0933603	0.173473	0.0571439	0.115648	0.226732	0.09999	0.226732	0.089279	0.0933603
Rectal Neoplasms	DOID:1984	0.0783424	0.0322586	0.0384622	NA	0.0783424	0.0384622	0.0934083	NA	0.351665	0.0321989	0.0613433	0.0384622	0.0613433	0.0476199	NA	0.0384622	0.0476199	0.0384622	0.0384622	0.115648	0.0680322	0.0476199	0.0934083	0.0476199	0.0476199	0.0823791	0.0322586	0.0230621	0.0476199	0.0476199	0.0338527	0.0613433	0.0345777	0.0322586	0.0384622	0.0823791	0.0613433	0.115769	0.0613433	0.0823791	0.0613433	0.0476199	0.0384622	0.0823791	0.0322586	0.0823791	0.0280133	0.0823791
Syringomyelia	DOID:327	0.0411723	0.09999	0.351665	NA	0.0411723	0.115648	0.0476199	NA	0.0571439	0.177607	0.173473	0.212832	0.0714299	0.255398	NA	0.115648	0.255398	0.351665	0.212832	0.0571439	0.0367619	0.138778	0.0476199	0.138778	0.138778	0.0933603	0.09999	0.141323	0.0571439	0.138778	0.10155	0.0714299	0.274072	0.184015	0.115648	0.0933603	0.173473	0.12825	0.173473	0.0933603	0.173473	0.0571439	0.115648	0.226732	0.184015	0.417263	0.271481	0.0933603
Leishmaniasis, Cutaneous	DOID:9111	0.0411723	0.0411723	0.0476199	NA	0.0411723	0.0476199	0.0476199	NA	0.0571439	0.0397384	0.0714299	0.0476199	0.0714299	0.0571439	NA	0.0476199	0.0571439	0.0476199	0.0476199	0.0571439	0.0367619	0.0571439	0.0476199	0.0571439	0.0571439	0.0933603	0.0411723	0.0316203	0.0571439	0.0571439	0.0418146	0.0714299	0.0412673	0.0411723	0.0476199	0.226732	0.0714299	0.12825	0.0714299	0.0933603	0.0714299	0.0571439	0.0476199	0.0933603	0.0411723	0.0933603	0.0367619	0.0933603
Pulmonary Fibrosis	DOID:2797	0.0322586	0.0783424	0.0934083	NA	0.0322586	0.0934083	0.0384622	NA	0.0476199	0.0781974	0.148977	0.0934083	0.0613433	0.115648	NA	0.44423	0.115648	0.0934083	0.0934083	0.0476199	0.0280133	0.115648	0.0384622	0.549999	0.115648	0.0823791	0.0783424	0.056008	0.0476199	0.115648	0.0822137	0.0613433	0.0839745	0.0783424	0.0934083	0.0823791	0.148977	0.115769	0.148977	0.0823791	0.148977	0.0476199	0.0934083	0.200064	0.0783424	0.200064	0.0680322	0.0823791
Lupus Erythematosus, Systemic	DOID:9074	0.041946	0.309764	0.114243	NA	0.041946	0.114243	0.0470412	NA	0.0545145	0.0987853	0.159332	0.114243	0.0656074	0.132392	NA	0.114243	0.132392	0.114243	0.114243	0.0545145	0.0384438	0.132392	0.0470412	0.132392	0.132392	0.0823681	0.101869	0.0834058	0.0545145	0.243646	0.159874	0.0656074	0.101664	0.101869	0.114243	0.0823681	0.159332	0.108385	0.159332	0.0823681	0.159332	0.0545145	0.114243	0.200037	0.101869	0.200037	0.0933635	0.0823681
Eyelid Diseases	DOID:530	0.0322586	0.0783424	0.171903	NA	0.0322586	0.0934083	0.0384622	NA	0.0476199	0.37189	0.148977	0.44423	0.0613433	0.212832	NA	0.0934083	0.212832	0.171903	0.44423	0.0476199	0.0280133	0.115648	0.0384622	0.115648	0.115648	0.0823791	0.0783424	0.266362	0.0476199	0.115648	0.0822137	0.0613433	0.154541	0.37258	0.0934083	0.0823791	0.148977	0.115769	0.148977	0.0823791	0.148977	0.0476199	0.0934083	0.200064	0.838709	0.368184	0.125202	0.0823791
Polycystic Kidney Diseases	DOID:898	0.0411723	0.0411723	0.0476199	NA	0.0411723	0.0476199	0.0476199	NA	0.0571439	0.0397384	0.0714299	0.0476199	0.0714299	0.0571439	NA	0.0476199	0.0571439	0.0476199	0.0476199	0.0571439	0.0367619	0.0571439	0.0476199	0.0571439	0.0571439	0.417263	0.0411723	0.0316203	0.659999	0.0571439	0.0418146	0.0714299	0.0412673	0.0411723	0.0476199	0.0933603	0.0714299	0.12825	0.0714299	0.0933603	0.0714299	0.421999	0.0476199	0.0933603	0.0411723	0.0933603	0.0367619	0.0933603
Ophthalmoplegia	DOID:539	0.0322586	0.0783424	0.171903	NA	0.0322586	0.0934083	0.0384622	NA	0.0476199	0.143909	0.148977	0.171903	0.0613433	0.351665	NA	0.0934083	0.833333	0.171903	0.171903	0.0476199	0.0280133	0.115648	0.0384622	0.115648	0.115648	0.0823791	0.0783424	0.103074	0.0476199	0.115648	0.0822137	0.0613433	0.255351	0.144176	0.0934083	0.0823791	0.148977	0.115769	0.148977	0.0823791	0.148977	0.0476199	0.0934083	0.200064	0.144176	0.368184	0.125202	0.0823791
Multiple Myeloma	DOID:9538	0.163075	0.0220824	0.0280133	NA	0.163075	0.0280133	0.206874	NA	0.089279	0.0235373	0.049858	0.0280133	0.049858	0.0367619	NA	0.0280133	0.0367619	0.0280133	0.0280133	0.271481	0.315373	0.0367619	0.206874	0.0367619	0.0367619	0.0698989	0.0220824	0.0132837	0.0367619	0.0367619	0.0247223	0.049858	0.0268613	0.0220824	0.0280133	0.0698989	0.049858	0.101627	0.049858	0.0698989	0.049858	0.0367619	0.0280133	0.0698989	0.0220824	0.0698989	0.0180216	0.0698989
Granulomatous Disease, Chronic	DOID:3265	0.0411723	0.09999	0.115648	NA	0.0411723	0.115648	0.0476199	NA	0.0571439	0.0965077	0.173473	0.115648	0.0714299	0.138778	NA	0.115648	0.138778	0.115648	0.115648	0.0571439	0.0367619	0.138778	0.0476199	0.138778	0.138778	0.0933603	0.09999	0.0767921	0.0571439	0.138778	0.308794	0.0714299	0.10022	0.09999	0.115648	0.0933603	0.173473	0.12825	0.173473	0.0933603	0.173473	0.0571439	0.115648	0.226732	0.09999	0.226732	0.089279	0.0933603
Lipidoses	DOID:9455	0.0545214	0.0545214	0.0613433	NA	0.0545214	0.0613433	0.0613433	NA	0.0714299	0.0509475	0.0865818	0.0613433	0.0865818	0.0714299	NA	0.0613433	0.0714299	0.0613433	0.0613433	0.0714299	0.049858	0.0714299	0.0613433	0.0714299	0.0714299	0.109892	0.0545214	0.0444246	0.0714299	0.0714299	0.0536764	0.386968	0.051166	0.0545214	0.0613433	0.109892	0.0865818	0.147106	0.0865818	0.491152	0.0865818	0.0714299	0.0613433	0.109892	0.0545214	0.109892	0.049858	0.491152
Glomerulonephritis	DOID:2921	0.0411723	0.09999	0.115648	NA	0.0411723	0.115648	0.0476199	NA	0.0571439	0.0965077	0.173473	0.115648	0.0714299	0.138778	NA	0.115648	0.138778	0.115648	0.115648	0.0571439	0.0367619	0.138778	0.0476199	0.138778	0.138778	0.0933603	0.09999	0.0767921	0.0571439	0.138778	0.10155	0.0714299	0.10022	0.09999	0.115648	0.0933603	0.173473	0.12825	0.173473	0.0933603	0.173473	0.0571439	0.115648	0.226732	0.09999	0.226732	0.089279	0.0933603
Hernia, Diaphragmatic	DOID:3827	0.0411723	0.184015	0.115648	NA	0.0411723	0.115648	0.0476199	NA	0.0571439	0.0965077	0.173473	0.115648	0.0714299	0.138778	NA	0.115648	0.138778	0.115648	0.115648	0.0571439	0.0367619	0.138778	0.0476199	0.138778	0.138778	0.0933603	0.09999	0.0767921	0.0571439	0.421999	0.10155	0.0714299	0.10022	0.09999	0.115648	0.0933603	0.173473	0.12825	0.173473	0.0933603	0.173473	0.0571439	0.115648	0.226732	0.09999	0.226732	0.089279	0.0933603
Migraine Disorders	DOID:6364	0.0411723	0.09999	0.351665	NA	0.0411723	0.115648	0.0476199	NA	0.0571439	0.177607	0.173473	0.212832	0.0714299	0.255398	NA	0.115648	0.255398	0.549999	0.212832	0.0571439	0.0367619	0.138778	0.0476199	0.138778	0.138778	0.0933603	0.09999	0.141323	0.0571439	0.138778	0.10155	0.0714299	0.274072	0.184015	0.115648	0.0933603	0.173473	0.12825	0.173473	0.0933603	0.173473	0.0571439	0.115648	0.226732	0.184015	0.417263	0.424592	0.0933603
Hemangioma	DOID:255	0.132409	0.0545214	0.0613433	NA	0.132409	0.0613433	0.148977	NA	0.319248	0.0509475	0.0865818	0.0613433	0.0865818	0.0714299	NA	0.0613433	0.0714299	0.0613433	0.0613433	0.173473	0.121084	0.0714299	0.148977	0.0714299	0.0714299	0.109892	0.0545214	0.0444246	0.0714299	0.0714299	0.0536764	0.0865818	0.051166	0.0545214	0.0613433	0.109892	0.0865818	0.147106	0.0865818	0.109892	0.0865818	0.0714299	0.0613433	0.109892	0.0545214	0.109892	0.049858	0.109892
Apraxias	DOID:4090	0.0411723	0.0411723	0.0476199	NA	0.0411723	0.0476199	0.0476199	NA	0.0571439	0.0397384	0.0714299	0.0476199	0.173473	0.0571439	NA	0.0476199	0.0571439	0.0476199	0.0476199	0.0571439	0.0367619	0.0571439	0.0476199	0.0571439	0.0571439	0.0933603	0.0411723	0.0316203	0.0571439	0.0571439	0.0418146	0.0714299	0.0412673	0.0411723	0.0476199	0.0933603	0.0714299	0.12825	0.0714299	0.0933603	0.0714299	0.0571439	0.0476199	0.0933603	0.0411723	0.0933603	0.0367619	0.0933603
Astrocytoma	DOID:4851	0.144176	0.0322586	0.0384622	NA	0.144176	0.0384622	0.171903	NA	0.115648	0.0321989	0.0613433	0.0384622	0.0613433	0.0476199	NA	0.0384622	0.0476199	0.0384622	0.0384622	0.212832	0.125202	0.0476199	0.171903	0.0476199	0.0476199	0.0823791	0.0322586	0.0230621	0.0476199	0.0476199	0.0338527	0.0613433	0.0345777	0.0322586	0.0384622	0.0823791	0.0613433	0.115769	0.0613433	0.0823791	0.0613433	0.0476199	0.0384622	0.0823791	0.0322586	0.0823791	0.0280133	0.0823791
Rett Syndrome	DOID:1206	0.0545214	0.0545214	0.0613433	NA	0.0545214	0.0613433	0.0613433	NA	0.0714299	0.0509475	0.0865818	0.0613433	0.21027	0.0714299	NA	0.0613433	0.0714299	0.0613433	0.0613433	0.0714299	0.049858	0.0714299	0.0613433	0.0714299	0.0714299	0.109892	0.0545214	0.0444246	0.0714299	0.0714299	0.0536764	0.0865818	0.051166	0.0545214	0.0613433	0.109892	0.0865818	0.147106	0.0865818	0.109892	0.0865818	0.0714299	0.0613433	0.109892	0.0545214	0.109892	0.049858	0.109892
Purpura, Thrombocytopenic, Idiopathic	DOID:8924	0.0262177	0.0636715	0.0783424	NA	0.0262177	0.0783424	0.0322586	NA	0.0411723	0.065727	0.132409	0.0783424	0.0545214	0.09999	NA	0.0783424	0.09999	0.0783424	0.0783424	0.0411723	0.0220824	0.09999	0.0322586	0.09999	0.09999	0.0749632	0.0636715	0.0419131	0.0411723	0.09999	0.1271	0.0545214	0.0728749	0.0636715	0.0783424	0.0749632	0.132409	0.10736	0.132409	0.0749632	0.132409	0.0411723	0.0783424	0.182054	0.0636715	0.182054	0.0536287	0.0749632
Dysgammaglobulinemia	DOID:11702	0.0322586	0.0783424	0.0934083	NA	0.0322586	0.0934083	0.0384622	NA	0.0476199	0.0781974	0.148977	0.0934083	0.0613433	0.115648	NA	0.0934083	0.115648	0.0934083	0.0934083	0.0476199	0.0280133	0.115648	0.0384622	0.115648	0.115648	0.0823791	0.0783424	0.056008	0.0476199	0.115648	0.390991	0.0613433	0.0839745	0.0783424	0.0934083	0.0823791	0.148977	0.115769	0.148977	0.0823791	0.148977	0.0476199	0.0934083	0.200064	0.0783424	0.200064	0.0680322	0.0823791
Candidiasis, Oral	DOID:14262	0.0322586	0.0322586	0.0384622	NA	0.0322586	0.0384622	0.0384622	NA	0.0476199	0.0321989	0.0613433	0.0384622	0.0613433	0.0476199	NA	0.0384622	0.0476199	0.0384622	0.0384622	0.0476199	0.0280133	0.0476199	0.0384622	0.0476199	0.0476199	0.0823791	0.0322586	0.0230621	0.0476199	0.0476199	0.0338527	0.0613433	0.0345777	0.0322586	0.0384622	0.200064	0.0613433	0.115769	0.0613433	0.0823791	0.0613433	0.0476199	0.0384622	0.0823791	0.0322586	0.0823791	0.0280133	0.0823791
Inflammatory Bowel Diseases	DOID:0050589	0.0545214	0.132409	0.148977	NA	0.0545214	0.148977	0.0613433	NA	0.0714299	0.12373	0.639393	0.148977	0.0865818	0.173473	NA	0.148977	0.173473	0.148977	0.148977	0.0714299	0.049858	0.173473	0.0613433	0.173473	0.173473	0.109892	0.132409	0.107888	0.0714299	0.173473	0.130357	0.0865818	0.12426	0.132409	0.148977	0.109892	0.21027	0.147106	0.21027	0.109892	0.21027	0.0714299	0.148977	0.266882	0.132409	0.266882	0.121084	0.109892
Myositis, Inclusion Body	DOID:3429	0.0262177	0.117177	0.0783424	NA	0.0262177	0.0783424	0.0322586	NA	0.0411723	0.065727	0.132409	0.0783424	0.0545214	0.09999	NA	0.0783424	0.09999	0.0783424	0.0783424	0.0411723	0.0220824	0.09999	0.0322586	0.09999	0.09999	0.0749632	0.0636715	0.0419131	0.0411723	0.720502	0.0690634	0.0545214	0.0728749	0.0636715	0.0783424	0.0749632	0.132409	0.10736	0.132409	0.0749632	0.132409	0.0411723	0.0783424	0.182054	0.0636715	0.182054	0.0536287	0.0749632
Parkinson Disease, Secondary	DOID:13548	0.0411723	0.09999	0.549999	NA	0.0411723	0.115648	0.0476199	NA	0.0571439	0.177607	0.173473	0.212832	0.0714299	0.255398	NA	0.115648	0.255398	0.351665	0.212832	0.0571439	0.0367619	0.138778	0.0476199	0.138778	0.138778	0.0933603	0.09999	0.141323	0.0571439	0.138778	0.10155	0.0714299	0.402119	0.184015	0.115648	0.0933603	0.173473	0.12825	0.173473	0.0933603	0.173473	0.0571439	0.115648	0.226732	0.184015	0.417263	0.271481	0.0933603
Acrocephalosyndactylia	DOID:14705	0.0192322	0.222127	0.0609274	NA	0.0192322	0.0609274	0.0250878	NA	0.0337236	0.0512448	0.113285	0.0609274	0.0466468	0.0819002	NA	0.0609274	0.0819002	0.0609274	0.0609274	0.0337236	0.0152224	0.0819002	0.0250878	0.0819002	0.0819002	0.0664141	0.0467067	0.0256052	0.0337236	0.150724	0.0538103	0.0466468	0.0599485	0.0467067	0.0609274	0.0664141	0.113285	0.0976859	0.113285	0.0664141	0.113285	0.0337236	0.0609274	0.161291	0.0467067	0.161291	0.0369686	0.0664141
Carcinoma, Pancreatic Ductal	DOID:3587	0.193613	0.0262177	0.0322586	NA	0.193613	0.0322586	0.238225	NA	0.09999	0.0270641	0.0545214	0.0322586	0.0545214	0.0411723	NA	0.0322586	0.0411723	0.0322586	0.0322586	0.304051	0.163075	0.0411723	0.37258	0.0411723	0.0411723	0.0749632	0.0262177	0.0172584	0.0411723	0.0411723	0.0284379	0.0545214	0.0300073	0.0262177	0.0322586	0.0749632	0.0545214	0.10736	0.0545214	0.0749632	0.0545214	0.0411723	0.0322586	0.0749632	0.0262177	0.0749632	0.0220824	0.0749632
Heart Septal Defects, Ventricular	DOID:1657	0.0322586	0.0783424	0.0934083	NA	0.0322586	0.284037	0.0384622	NA	0.0476199	0.0781974	0.148977	0.0934083	0.0613433	0.115648	NA	0.0934083	0.115648	0.0934083	0.0934083	0.0476199	0.0280133	0.115648	0.0384622	0.115648	0.115648	0.0823791	0.144176	0.056008	0.0476199	0.115648	0.0822137	0.0613433	0.0839745	0.0783424	0.284037	0.0823791	0.148977	0.115769	0.148977	0.0823791	0.148977	0.0476199	0.171903	0.200064	0.0783424	0.200064	0.0680322	0.0823791
Thymus Neoplasms	DOID:3277	0.304051	0.0411723	0.0476199	NA	0.304051	0.0476199	0.351665	NA	0.138778	0.0397384	0.0714299	0.0476199	0.0714299	0.0571439	NA	0.0476199	0.0571439	0.0476199	0.0476199	0.421999	0.424592	0.0571439	0.351665	0.0571439	0.0571439	0.0933603	0.0411723	0.0316203	0.0571439	0.0571439	0.0418146	0.0714299	0.0412673	0.0411723	0.0476199	0.0933603	0.0714299	0.12825	0.0714299	0.0933603	0.0714299	0.0571439	0.0476199	0.0933603	0.0411723	0.0933603	0.0367619	0.0933603
Vitamin E Deficiency	DOID:4026	NA	NA	NA	NA	NA	NA	NA	NA	NA	NA	NA	NA	NA	NA	NA	NA	NA	NA	NA	NA	NA	NA	NA	NA	NA	NA	NA	NA	NA	NA	NA	NA	NA	NA	NA	NA	NA	NA	NA	NA	NA	NA	NA	NA	NA	NA	NA	NA
Graves Disease	DOID:12361	0.0318791	0.0774206	0.0892681	NA	0.0318791	0.0892681	0.0367575	NA	0.0439086	0.0774163	0.132392	0.0892681	0.0545145	0.106635	NA	0.0892681	0.106635	0.0892681	0.0892681	0.0439086	0.0285246	0.196245	0.0367575	0.106635	0.196245	0.070519	0.0774206	0.0597331	0.0439086	0.106635	0.136425	0.0545145	0.0823045	0.0774206	0.0892681	0.070519	0.243646	0.0953135	0.243646	0.070519	0.132392	0.0439086	0.0892681	0.17126	0.0774206	0.17126	0.0692741	0.070519
Atrioventricular Block	DOID:0050820	0.0545214	0.132409	0.148977	NA	0.0545214	0.274167	0.0613433	NA	0.0714299	0.12373	0.21027	0.148977	0.0865818	0.173473	NA	0.148977	0.173473	0.148977	0.148977	0.0714299	0.049858	0.173473	0.0613433	0.173473	0.173473	0.109892	0.243677	0.107888	0.0714299	0.173473	0.130357	0.0865818	0.12426	0.132409	0.274167	0.109892	0.21027	0.147106	0.21027	0.109892	0.21027	0.0714299	0.274167	0.266882	0.132409	0.266882	0.121084	0.109892
Chondrodysplasia Punctata	DOID:2581	0.10736	0.10736	0.115769	NA	0.10736	0.115769	0.115769	NA	0.12825	0.0943727	0.147106	0.115769	0.147106	0.12825	NA	0.115769	0.12825	0.115769	0.115769	0.12825	0.101627	0.12825	0.115769	0.12825	0.12825	0.428329	0.10736	0.094962	0.311463	0.12825	0.0999124	0.147106	0.0889973	0.10736	0.115769	0.176371	0.147106	0.223744	0.147106	0.176371	0.147106	0.311463	0.115769	0.176371	0.10736	0.176371	0.101627	0.176371
Nose Diseases	DOID:2825	0.0545214	0.132409	0.148977	NA	0.0545214	0.148977	0.0613433	NA	0.0714299	0.12373	0.21027	0.148977	0.0865818	0.173473	NA	0.274167	0.173473	0.148977	0.148977	0.0714299	0.049858	0.173473	0.0613433	0.319248	0.173473	0.109892	0.132409	0.107888	0.0714299	0.173473	0.130357	0.0865818	0.12426	0.132409	0.148977	0.109892	0.21027	0.147106	0.21027	0.109892	0.21027	0.0714299	0.148977	0.266882	0.132409	0.266882	0.121084	0.109892
Brugada Syndrome	DOID:0050451	0.0545214	0.132409	0.148977	NA	0.0545214	0.274167	0.0613433	NA	0.0714299	0.12373	0.21027	0.148977	0.0865818	0.173473	NA	0.148977	0.173473	0.148977	0.148977	0.0714299	0.049858	0.173473	0.0613433	0.173473	0.173473	0.109892	0.243677	0.107888	0.0714299	0.173473	0.130357	0.0865818	0.12426	0.132409	0.274167	0.109892	0.21027	0.147106	0.21027	0.109892	0.21027	0.0714299	0.274167	0.266882	0.132409	0.266882	0.121084	0.109892
Pierre Robin Syndrome	DOID:4258	0.0262177	0.302808	0.0783424	NA	0.0262177	0.0783424	0.0322586	NA	0.0411723	0.065727	0.132409	0.0783424	0.0545214	0.09999	NA	0.0783424	0.09999	0.0783424	0.0783424	0.0411723	0.0220824	0.09999	0.0322586	0.09999	0.09999	0.0749632	0.0636715	0.0419131	0.0411723	0.184015	0.0690634	0.0545214	0.0728749	0.0636715	0.0783424	0.0749632	0.132409	0.10736	0.132409	0.0749632	0.132409	0.0411723	0.0783424	0.182054	0.0636715	0.182054	0.0536287	0.0749632
Bronchiolitis Obliterans	DOID:2799	0.028986	0.0703946	0.0838176	NA	0.028986	0.0838176	0.0345131	NA	0.0426447	0.0713616	0.133011	0.0838176	0.0547694	0.103566	NA	0.398619	0.103566	0.0838176	0.0838176	0.0426447	0.0251949	0.103566	0.0345131	0.746268	0.103566	0.073214	0.0703946	0.0504281	0.0426447	0.103566	0.0746915	0.0547694	0.0774163	0.0703946	0.0838176	0.073214	0.133011	0.102146	0.133011	0.073214	0.133011	0.0426447	0.0838176	0.177805	0.0703946	0.177805	0.0611876	0.073214
Alexander Disease	DOID:4252	0.0262177	0.0636715	0.238225	NA	0.0262177	0.0783424	0.0322586	NA	0.0411723	0.12096	0.132409	0.144176	0.0545214	0.184015	NA	0.0783424	0.184015	0.37258	0.144176	0.0411723	0.0220824	0.09999	0.0322586	0.09999	0.09999	0.0749632	0.0636715	0.0771343	0.0411723	0.09999	0.0690634	0.0545214	0.191655	0.117177	0.0783424	0.0749632	0.132409	0.10736	0.132409	0.0749632	0.132409	0.0411723	0.0783424	0.182054	0.117177	0.33504	0.255047	0.0749632
Schistosomiasis	DOID:1395	0.0545214	0.0545214	0.0613433	NA	0.0545214	0.0613433	0.0613433	NA	0.0714299	0.0509475	0.0865818	0.0613433	0.0865818	0.0714299	NA	0.0613433	0.0714299	0.0613433	0.0613433	0.0714299	0.049858	0.0714299	0.0613433	0.0714299	0.0714299	0.109892	0.0545214	0.0444246	0.0714299	0.0714299	0.0536764	0.0865818	0.051166	0.0545214	0.0613433	0.266882	0.0865818	0.147106	0.0865818	0.109892	0.0865818	0.0714299	0.0613433	0.109892	0.0545214	0.109892	0.049858	0.109892
Ophthalmoplegia, Chronic Progressive External	DOID:12558	0.0262177	0.117177	0.0783424	NA	0.0262177	0.0783424	0.0322586	NA	0.0411723	0.065727	0.132409	0.0783424	0.0545214	0.09999	NA	0.0783424	0.09999	0.0783424	0.0783424	0.0411723	0.0220824	0.09999	0.0322586	0.09999	0.09999	0.0749632	0.0636715	0.0419131	0.0411723	0.720502	0.0690634	0.0545214	0.0728749	0.0636715	0.0783424	0.0749632	0.132409	0.10736	0.132409	0.0749632	0.132409	0.0411723	0.0783424	0.182054	0.0636715	0.182054	0.0536287	0.0749632
Schistosomiasis mansoni	DOID:0050597	0.0411723	0.0411723	0.0476199	NA	0.0411723	0.0476199	0.0476199	NA	0.0571439	0.0397384	0.0714299	0.0476199	0.0714299	0.0571439	NA	0.0476199	0.0571439	0.0476199	0.0476199	0.0571439	0.0367619	0.0571439	0.0476199	0.0571439	0.0571439	0.0933603	0.0411723	0.0316203	0.0571439	0.0571439	0.0418146	0.0714299	0.0412673	0.0411723	0.0476199	0.226732	0.0714299	0.12825	0.0714299	0.0933603	0.0714299	0.0571439	0.0476199	0.0933603	0.0411723	0.0933603	0.0367619	0.0933603
Ear Diseases	DOID:2742	0.0545214	0.132409	0.274167	NA	0.0545214	0.148977	0.0613433	NA	0.0714299	0.376239	0.21027	0.45301	0.0865818	0.319248	NA	0.148977	0.319248	0.274167	0.45301	0.0714299	0.049858	0.173473	0.0613433	0.173473	0.173473	0.109892	0.132409	0.328068	0.0714299	0.173473	0.130357	0.0865818	0.228681	0.402632	0.148977	0.109892	0.21027	0.147106	0.21027	0.109892	0.21027	0.0714299	0.148977	0.266882	0.402632	0.491152	0.222835	0.109892
Alagille Syndrome	DOID:9245	0.0411723	0.09999	0.115648	NA	0.0411723	0.115648	0.0476199	NA	0.0571439	0.0965077	0.319248	0.115648	0.0714299	0.138778	NA	0.115648	0.138778	0.115648	0.115648	0.0571439	0.0367619	0.138778	0.0476199	0.138778	0.138778	0.0933603	0.09999	0.0767921	0.0571439	0.138778	0.10155	0.0714299	0.10022	0.09999	0.115648	0.0933603	0.173473	0.12825	0.173473	0.0933603	0.173473	0.0571439	0.115648	0.226732	0.09999	0.226732	0.089279	0.0933603
Bardet-Biedl Syndrome	DOID:1935	0.0411723	0.0411723	0.0476199	NA	0.0411723	0.0476199	0.0476199	NA	0.0571439	0.0397384	0.0714299	0.0476199	0.0714299	0.0571439	NA	0.0476199	0.0571439	0.0476199	0.0476199	0.0571439	0.0367619	0.0571439	0.0476199	0.0571439	0.0571439	0.417263	0.0411723	0.0316203	0.421999	0.0571439	0.0418146	0.0714299	0.0412673	0.0411723	0.0476199	0.0933603	0.0714299	0.12825	0.0714299	0.0933603	0.0714299	0.659999	0.0476199	0.0933603	0.0411723	0.0933603	0.0367619	0.0933603
Agranulocytosis	DOID:12987	0.0322586	0.0783424	0.0934083	NA	0.0322586	0.0934083	0.0384622	NA	0.0476199	0.0781974	0.148977	0.0934083	0.0613433	0.115648	NA	0.0934083	0.115648	0.0934083	0.0934083	0.0476199	0.0280133	0.115648	0.0384622	0.115648	0.115648	0.0823791	0.0783424	0.056008	0.0476199	0.115648	0.249997	0.0613433	0.0839745	0.0783424	0.0934083	0.0823791	0.148977	0.115769	0.148977	0.0823791	0.148977	0.0476199	0.0934083	0.200064	0.0783424	0.200064	0.0680322	0.0823791
Thalassemia	DOID:10241	0.0411723	0.0411723	0.0476199	NA	0.0411723	0.0476199	0.0476199	NA	0.0571439	0.0397384	0.0714299	0.0476199	0.0714299	0.0571439	NA	0.0476199	0.0571439	0.0476199	0.0476199	0.0571439	0.0367619	0.0571439	0.0476199	0.0571439	0.0571439	0.417263	0.0411723	0.0316203	0.421999	0.0571439	0.0418146	0.0714299	0.0412673	0.0411723	0.0476199	0.0933603	0.0714299	0.12825	0.0714299	0.0933603	0.0714299	0.659999	0.0476199	0.0933603	0.0411723	0.0933603	0.0367619	0.0933603
Amyloidosis	DOID:9120	0.0749632	0.0749632	0.0823791	NA	0.0749632	0.0823791	0.0823791	NA	0.0933603	0.0679241	0.109892	0.0823791	0.109892	0.0933603	NA	0.0823791	0.0933603	0.0823791	0.0823791	0.0933603	0.0698989	0.0933603	0.0823791	0.0933603	0.0933603	0.135413	0.0749632	0.0640035	0.0933603	0.0933603	0.0716984	0.266882	0.066053	0.0749632	0.0823791	0.135413	0.109892	0.176371	0.109892	0.328859	0.109892	0.0933603	0.0823791	0.135413	0.0749632	0.135413	0.0698989	0.328859
Abruptio Placentae	DOID:9667	0.0322586	0.0783424	0.0934083	NA	0.0322586	0.0934083	0.0384622	NA	0.0476199	0.0781974	0.148977	0.0934083	0.0613433	0.115648	NA	0.0934083	0.115648	0.0934083	0.0934083	0.0476199	0.0280133	0.115648	0.0384622	0.115648	0.115648	0.0823791	0.0783424	0.056008	0.0476199	0.115648	0.0822137	0.0613433	0.0839745	0.0783424	0.0934083	0.0823791	0.148977	0.115769	0.148977	0.0823791	0.148977	0.0476199	0.0934083	0.200064	0.0783424	0.200064	0.0680322	0.0823791
Respiratory Insufficiency	DOID:11162	0.0411723	0.09999	0.115648	NA	0.0411723	0.115648	0.0476199	NA	0.0571439	0.0965077	0.173473	0.115648	0.0714299	0.138778	NA	0.833333	0.138778	0.115648	0.115648	0.0571439	0.0367619	0.138778	0.0476199	0.659999	0.138778	0.0933603	0.09999	0.0767921	0.0571439	0.138778	0.10155	0.0714299	0.10022	0.09999	0.115648	0.0933603	0.173473	0.12825	0.173473	0.0933603	0.173473	0.0571439	0.115648	0.226732	0.09999	0.226732	0.089279	0.0933603
Multiple Endocrine Neoplasia	DOID:3125	NA	NA	NA	NA	NA	NA	NA	NA	NA	NA	NA	NA	NA	NA	NA	NA	NA	NA	NA	NA	NA	NA	NA	NA	NA	NA	NA	NA	NA	NA	NA	NA	NA	NA	NA	NA	NA	NA	NA	NA	NA	NA	NA	NA	NA	NA	NA	NA
Hypertriglyceridemia	DOID:0050527	0.0545214	0.0545214	0.0613433	NA	0.0545214	0.0613433	0.0613433	NA	0.0714299	0.0509475	0.0865818	0.0613433	0.0865818	0.0714299	NA	0.0613433	0.0714299	0.0613433	0.0613433	0.0714299	0.049858	0.0714299	0.0613433	0.0714299	0.0714299	0.109892	0.0545214	0.0444246	0.0714299	0.0714299	0.0536764	0.639393	0.051166	0.0545214	0.0613433	0.109892	0.0865818	0.147106	0.0865818	0.491152	0.0865818	0.0714299	0.0613433	0.109892	0.0545214	0.109892	0.049858	0.491152
Heroin Dependence	DOID:9976	0.0322586	0.0322586	0.0384622	NA	0.0322586	0.0384622	0.0384622	NA	0.0476199	0.0321989	0.0613433	0.0384622	0.148977	0.0476199	NA	0.0384622	0.0476199	0.0384622	0.0384622	0.0476199	0.0280133	0.0476199	0.0384622	0.0476199	0.0476199	0.0823791	0.0322586	0.0230621	0.0476199	0.0476199	0.0338527	0.0613433	0.0345777	0.0322586	0.0384622	0.0823791	0.0613433	0.115769	0.0613433	0.0823791	0.0613433	0.0476199	0.0384622	0.0823791	0.0322586	0.0823791	0.0280133	0.0823791
Hemangioma, Capillary	DOID:2725	0.0636715	0.0262177	0.0322586	NA	0.0636715	0.0322586	0.0783424	NA	0.304051	0.0270641	0.0545214	0.0322586	0.0545214	0.0411723	NA	0.0322586	0.0411723	0.0322586	0.0322586	0.09999	0.0536287	0.0411723	0.0783424	0.0411723	0.0411723	0.0749632	0.0262177	0.0172584	0.0411723	0.0411723	0.0284379	0.0545214	0.0300073	0.0262177	0.0322586	0.0749632	0.0545214	0.10736	0.0545214	0.0749632	0.0545214	0.0411723	0.0322586	0.0749632	0.0262177	0.0749632	0.0220824	0.0749632
Insulinoma	DOID:3892	0.177542	0.0312113	0.0359795	NA	0.177542	0.0359795	0.212206	NA	0.192029	0.0312906	0.0533176	0.0359795	0.0533176	0.0429654	NA	0.0359795	0.0429654	0.0359795	0.0359795	0.262991	0.153698	0.0429654	0.317102	0.0429654	0.0429654	0.0689206	0.0312113	0.0240887	0.0429654	0.0429654	0.0325637	0.0533176	0.0333254	0.0312113	0.0359795	0.0689206	0.0533176	0.0930484	0.0533176	0.0689206	0.0533176	0.0429654	0.0359795	0.0689206	0.0312113	0.0689206	0.0279314	0.0689206
Amyotrophic Lateral Sclerosis	DOID:332	0.0322586	0.0783424	0.44423	NA	0.0322586	0.0934083	0.0384622	NA	0.0476199	0.143909	0.148977	0.171903	0.0613433	0.212832	NA	0.0934083	0.212832	0.284037	0.171903	0.0476199	0.0280133	0.115648	0.0384622	0.115648	0.115648	0.0823791	0.0783424	0.103074	0.0476199	0.115648	0.0822137	0.0613433	0.325918	0.144176	0.0934083	0.0823791	0.148977	0.115769	0.148977	0.0823791	0.148977	0.0476199	0.0934083	0.200064	0.144176	0.368184	0.206874	0.0823791
Glycogen Storage Disease	DOID:2747	0.0411723	0.0411723	0.0476199	NA	0.0411723	0.0476199	0.0476199	NA	0.0571439	0.0397384	0.0714299	0.0476199	0.0714299	0.0571439	NA	0.0476199	0.0571439	0.0476199	0.0476199	0.0571439	0.0367619	0.0571439	0.0476199	0.0571439	0.0571439	0.0933603	0.0411723	0.0316203	0.0571439	0.0571439	0.0418146	0.319248	0.0412673	0.0411723	0.0476199	0.0933603	0.0714299	0.12825	0.0714299	0.417263	0.0714299	0.0571439	0.0476199	0.0933603	0.0411723	0.0933603	0.0367619	0.417263
Vulvar Neoplasms	DOID:1245	0.238225	0.0322586	0.0384622	NA	0.238225	0.0384622	0.284037	NA	0.115648	0.0321989	0.0613433	0.0384622	0.0613433	0.0476199	NA	0.0384622	0.0476199	0.0384622	0.0384622	0.351665	0.206874	0.0476199	0.284037	0.0476199	0.0476199	0.0823791	0.0322586	0.0230621	0.0476199	0.0476199	0.0338527	0.0613433	0.0345777	0.0322586	0.0384622	0.0823791	0.0613433	0.115769	0.0613433	0.0823791	0.0613433	0.0476199	0.0384622	0.0823791	0.0322586	0.0823791	0.0280133	0.0823791
Arthritis	DOID:848	0.0322586	0.564516	0.0934083	NA	0.0322586	0.0934083	0.0384622	NA	0.0476199	0.0781974	0.148977	0.0934083	0.0613433	0.115648	NA	0.0934083	0.115648	0.0934083	0.0934083	0.0476199	0.0280133	0.115648	0.0384622	0.115648	0.115648	0.0823791	0.0783424	0.056008	0.0476199	0.212832	0.0822137	0.0613433	0.0839745	0.0783424	0.0934083	0.0823791	0.148977	0.115769	0.148977	0.0823791	0.148977	0.0476199	0.0934083	0.200064	0.0783424	0.200064	0.0680322	0.0823791
Idiopathic Pulmonary Fibrosis	DOID:0050156	0.0262177	0.0636715	0.0783424	NA	0.0262177	0.0783424	0.0322586	NA	0.0411723	0.065727	0.132409	0.0783424	0.0545214	0.09999	NA	0.37258	0.09999	0.0783424	0.0783424	0.0411723	0.0220824	0.09999	0.0322586	0.475531	0.09999	0.0749632	0.0636715	0.0419131	0.0411723	0.09999	0.0690634	0.0545214	0.0728749	0.0636715	0.0783424	0.0749632	0.132409	0.10736	0.132409	0.0749632	0.132409	0.0411723	0.0783424	0.182054	0.0636715	0.182054	0.0536287	0.0749632
Lipodystrophy	DOID:811	0.0545214	0.132409	0.148977	NA	0.0545214	0.148977	0.0613433	NA	0.0714299	0.12373	0.21027	0.148977	0.0865818	0.173473	NA	0.148977	0.173473	0.148977	0.148977	0.0714299	0.049858	0.173473	0.0613433	0.173473	0.173473	0.109892	0.132409	0.107888	0.0714299	0.173473	0.130357	0.0865818	0.12426	0.132409	0.148977	0.109892	0.21027	0.147106	0.21027	0.109892	0.639393	0.0714299	0.148977	0.811538	0.132409	0.266882	0.121084	0.109892
Hemoglobinuria, Paroxysmal	DOID:0060284	0.0264596	0.0642591	0.0764317	NA	0.0264596	0.0764317	0.0314719	NA	0.0388268	0.0659367	0.120825	0.0764317	0.0497514	0.0942937	NA	0.0764317	0.0942937	0.0764317	0.0764317	0.0388268	0.0230156	0.0942937	0.0314719	0.0942937	0.0942937	0.0662743	0.0642591	0.0461051	0.0388268	0.0942937	0.173327	0.0497514	0.0721155	0.0642591	0.0764317	0.0662743	0.120825	0.0919616	0.120825	0.0662743	0.120825	0.0388268	0.0764317	0.160952	0.0642591	0.160952	0.0558949	0.0662743
Tuberculosis	DOID:399	0.0545214	0.0545214	0.0613433	NA	0.0545214	0.0613433	0.0613433	NA	0.0714299	0.0509475	0.0865818	0.0613433	0.0865818	0.0714299	NA	0.0613433	0.0714299	0.0613433	0.0613433	0.0714299	0.049858	0.0714299	0.0613433	0.0714299	0.0714299	0.109892	0.0545214	0.0444246	0.0714299	0.0714299	0.0536764	0.0865818	0.051166	0.0545214	0.0613433	0.266882	0.0865818	0.147106	0.0865818	0.109892	0.0865818	0.0714299	0.0613433	0.109892	0.0545214	0.109892	0.049858	0.109892
Epidermolysis Bullosa Dystrophica	DOID:4959	0.0322586	0.0783424	0.0934083	NA	0.0322586	0.0934083	0.0384622	NA	0.0476199	0.0781974	0.148977	0.0934083	0.0613433	0.115648	NA	0.0934083	0.115648	0.0934083	0.0934083	0.0476199	0.0280133	0.115648	0.0384622	0.115648	0.115648	0.0823791	0.0783424	0.056008	0.0476199	0.115648	0.0822137	0.0613433	0.0839745	0.0783424	0.0934083	0.0823791	0.148977	0.115769	0.148977	0.0823791	0.45301	0.0476199	0.0934083	0.608356	0.0783424	0.200064	0.0680322	0.0823791
Strabismus	DOID:9306	0.0215554	0.0523489	0.118258	NA	0.0215554	0.0642591	0.0264596	NA	0.0336539	0.313495	0.107671	0.568305	0.0443352	0.248529	NA	0.0642591	0.588933	0.118258	0.390632	0.0336539	0.0181849	0.081731	0.0264596	0.081731	0.081731	0.0604798	0.0523489	0.178723	0.0336539	0.081731	0.0578805	0.0443352	0.19057	0.30559	0.0642591	0.0604798	0.107671	0.0855538	0.107671	0.0604798	0.107671	0.0336539	0.0642591	0.14688	0.210042	0.270308	0.0812755	0.0604798
Scurvy	DOID:13724	0.0411723	0.0411723	0.0476199	NA	0.0411723	0.0476199	0.0476199	NA	0.0571439	0.0397384	0.0714299	0.0476199	0.0714299	0.0571439	NA	0.0476199	0.0571439	0.0476199	0.0476199	0.0571439	0.0367619	0.0571439	0.0476199	0.0571439	0.0571439	0.0933603	0.0411723	0.0316203	0.0571439	0.0571439	0.0418146	0.173473	0.0412673	0.0411723	0.0476199	0.0933603	0.0714299	0.12825	0.0714299	0.226732	0.0714299	0.0571439	0.0476199	0.0933603	0.0411723	0.0933603	0.0367619	0.226732
Crohn Disease	DOID:8778	0.0411723	0.09999	0.115648	NA	0.0411723	0.115648	0.0476199	NA	0.0571439	0.0965077	0.527499	0.115648	0.0714299	0.138778	NA	0.115648	0.138778	0.115648	0.115648	0.0571439	0.0367619	0.138778	0.0476199	0.138778	0.138778	0.0933603	0.09999	0.0767921	0.0571439	0.138778	0.10155	0.0714299	0.10022	0.09999	0.115648	0.0933603	0.173473	0.12825	0.173473	0.0933603	0.173473	0.0571439	0.115648	0.226732	0.09999	0.226732	0.089279	0.0933603
Thyroiditis, Autoimmune	DOID:7188	0.0318791	0.0774206	0.0892681	NA	0.0318791	0.0892681	0.0367575	NA	0.0439086	0.0774163	0.132392	0.0892681	0.0545145	0.106635	NA	0.0892681	0.106635	0.0892681	0.0892681	0.0439086	0.0285246	0.196245	0.0367575	0.106635	0.196245	0.070519	0.0774206	0.0597331	0.0439086	0.106635	0.136425	0.0545145	0.0823045	0.0774206	0.0892681	0.070519	0.243646	0.0953135	0.243646	0.070519	0.132392	0.0439086	0.0892681	0.17126	0.0774206	0.17126	0.0692741	0.070519
Angelman Syndrome	DOID:1932	0.0749632	0.0749632	0.0823791	NA	0.0749632	0.0823791	0.0823791	NA	0.0933603	0.0679241	0.109892	0.0823791	0.109892	0.0933603	NA	0.0823791	0.0933603	0.0823791	0.0823791	0.0933603	0.0698989	0.0933603	0.0823791	0.0933603	0.0933603	0.328859	0.0749632	0.0640035	0.226732	0.0933603	0.0716984	0.109892	0.066053	0.0749632	0.0823791	0.135413	0.109892	0.176371	0.109892	0.135413	0.109892	0.226732	0.0823791	0.135413	0.0749632	0.135413	0.0698989	0.135413
Hernia, Umbilical	DOID:0060321	0.0545214	0.132409	0.148977	NA	0.0545214	0.148977	0.0613433	NA	0.0714299	0.12373	0.639393	0.148977	0.0865818	0.173473	NA	0.148977	0.173473	0.148977	0.148977	0.0714299	0.049858	0.173473	0.0613433	0.173473	0.173473	0.109892	0.132409	0.107888	0.0714299	0.173473	0.130357	0.0865818	0.12426	0.132409	0.148977	0.109892	0.21027	0.147106	0.21027	0.109892	0.21027	0.0714299	0.148977	0.266882	0.132409	0.266882	0.121084	0.109892
Pulmonary Blastoma	DOID:4765	0.238225	0.0322586	0.0384622	NA	0.238225	0.0384622	0.284037	NA	0.115648	0.0321989	0.0613433	0.0384622	0.0613433	0.0476199	NA	0.0384622	0.0476199	0.0384622	0.0384622	0.351665	0.206874	0.0476199	0.284037	0.0476199	0.0476199	0.0823791	0.0322586	0.0230621	0.0476199	0.0476199	0.0338527	0.0613433	0.0345777	0.0322586	0.0384622	0.0823791	0.0613433	0.115769	0.0613433	0.0823791	0.0613433	0.0476199	0.0384622	0.0823791	0.0322586	0.0823791	0.0280133	0.0823791
Gonadal Dysgenesis, 46,XY	DOID:14448	0.0322586	0.0783424	0.0934083	NA	0.0322586	0.0934083	0.0384622	NA	0.0476199	0.0781974	0.148977	0.0934083	0.0613433	0.115648	NA	0.0934083	0.115648	0.0934083	0.0934083	0.0476199	0.0280133	0.212832	0.0384622	0.115648	0.351665	0.0823791	0.0783424	0.056008	0.0476199	0.115648	0.0822137	0.0613433	0.0839745	0.0783424	0.0934083	0.0823791	0.274167	0.115769	0.274167	0.0823791	0.148977	0.0476199	0.0934083	0.200064	0.0783424	0.200064	0.0680322	0.0823791
Ankylosis	DOID:227	0.0262177	0.681648	0.0783424	NA	0.0262177	0.0783424	0.0322586	NA	0.0411723	0.065727	0.132409	0.0783424	0.0545214	0.09999	NA	0.0783424	0.09999	0.0783424	0.0783424	0.0411723	0.0220824	0.09999	0.0322586	0.09999	0.09999	0.0749632	0.0636715	0.0419131	0.0411723	0.184015	0.0690634	0.0545214	0.0728749	0.0636715	0.0783424	0.0749632	0.132409	0.10736	0.132409	0.0749632	0.132409	0.0411723	0.0783424	0.182054	0.0636715	0.182054	0.0536287	0.0749632
Mitochondrial Encephalomyopathies	DOID:890	0.0262177	0.117177	0.0783424	NA	0.0262177	0.0783424	0.0322586	NA	0.0411723	0.065727	0.132409	0.0783424	0.0545214	0.09999	NA	0.0783424	0.09999	0.0783424	0.0783424	0.0411723	0.0220824	0.09999	0.0322586	0.09999	0.09999	0.0749632	0.0636715	0.0419131	0.0411723	0.720502	0.0690634	0.0545214	0.0728749	0.0636715	0.0783424	0.0749632	0.132409	0.10736	0.132409	0.0749632	0.132409	0.0411723	0.0783424	0.182054	0.0636715	0.182054	0.0536287	0.0749632
Uremia	DOID:4676	0.0411723	0.09999	0.115648	NA	0.0411723	0.115648	0.0476199	NA	0.0571439	0.0965077	0.173473	0.115648	0.0714299	0.138778	NA	0.115648	0.138778	0.115648	0.115648	0.0571439	0.0367619	0.138778	0.0476199	0.138778	0.138778	0.0933603	0.09999	0.0767921	0.0571439	0.138778	0.10155	0.0714299	0.10022	0.09999	0.115648	0.0933603	0.173473	0.12825	0.173473	0.0933603	0.173473	0.0571439	0.115648	0.226732	0.09999	0.226732	0.089279	0.0933603
Carcinoma, Squamous Cell	DOID:0050865	0.193613	0.0262177	0.0322586	NA	0.193613	0.0322586	0.37258	NA	0.09999	0.0270641	0.0545214	0.0322586	0.0545214	0.0411723	NA	0.0322586	0.0411723	0.0322586	0.0322586	0.475531	0.163075	0.0411723	0.238225	0.0411723	0.0411723	0.0749632	0.0262177	0.0172584	0.0411723	0.0411723	0.0284379	0.0545214	0.0300073	0.0262177	0.0322586	0.0749632	0.0545214	0.10736	0.0545214	0.0749632	0.0545214	0.0411723	0.0322586	0.0749632	0.0262177	0.0749632	0.0220824	0.0749632
Corneal Dystrophies, Hereditary	DOID:12318	0.0220824	0.0536287	0.125202	NA	0.0220824	0.0680322	0.0280133	NA	0.0367619	0.383697	0.121084	0.490223	0.049858	0.164303	NA	0.0680322	0.164303	0.125202	0.490223	0.0367619	0.0180216	0.089279	0.0280133	0.089279	0.089279	0.0698989	0.0536287	0.23246	0.0367619	0.089279	0.0600399	0.049858	0.120054	0.386435	0.0680322	0.0698989	0.121084	0.101627	0.121084	0.0698989	0.121084	0.0367619	0.0680322	0.169754	0.255047	0.312405	0.0805457	0.0698989
[truncated: 270 more rows]
[truncated: 1,077 more columns]
